# Supplementary material for: EDF1 coordinates cellular responses to ribosome collisions
Source: eLife. 2020 Aug 3;9:e58828. doi: 10.7554/eLife.58828 (PMC7486125; doi:10.7554/eLife.58828)
Supplement: Figure 1—source data 1. — Eleven 6-plex TMT-MS3 analysis of HCT116 cells. [file elife-58828-fig1-data1.xlsx]

## Sheet: Fig1-source-data-1
Sinha N. et al. (2020)
Figure 1-source data 1: Related to Figure 1 and Figure 1-figure supplement 1

## Sheet: HCT116 Sucrose Gradient
Sucrose gradient fraction analysis with or without low dose emetine treatment. Eleven 6-plex TMT-MS3 analysis of HCT116 cells. Analyzed with Comet (2018.01 rev. 2)
Related to Figure 1C-1H and Figure 1-figure supplement 1B-1P
				Annotations				Quantified Peptides											TMT intensity (sum signal to noise)
Rank	UniProt ID	Gene Symbol	Description	Ribosome_Full_List	Ribosome_Detailed	Ub Ligase or DUB	Kinase or Phosphatase	Fr01 Quant Peptides	Fr02 Quant Peptides	Fr03 Quant Peptides	Fr04 Quant Peptides	Fr05 Quant Peptides	Fr06 Quant Peptides	Fr07 Quant Peptides	Fr08 Quant Peptides	Fr09 Quant Peptides	Fr10 Quant Peptides	Fr11 Quant Peptides	Fr01~UT_01_sum_sn	Fr01~UT_02_sum_sn	Fr01~UT_03_sum_sn	Fr01~EL_01_sum_sn	Fr01~EL_02_sum_sn	Fr01~EL_03_sum_sn	Fr02~UT_01_sum_sn	Fr02~UT_02_sum_sn	Fr02~UT_03_sum_sn	Fr02~EL_01_sum_sn	Fr02~EL_02_sum_sn	Fr02~EL_03_sum_sn	Fr03~UT_01_sum_sn	Fr03~UT_02_sum_sn	Fr03~UT_03_sum_sn	Fr03~EL_01_sum_sn	Fr03~EL_02_sum_sn	Fr03~EL_03_sum_sn	Fr04~UT_01_sum_sn	Fr04~UT_02_sum_sn	Fr04~UT_03_sum_sn	Fr04~EL_01_sum_sn	Fr04~EL_02_sum_sn	Fr04~EL_03_sum_sn	Fr05~UT_01_sum_sn	Fr05~UT_02_sum_sn	Fr05~UT_03_sum_sn	Fr05~EL_01_sum_sn	Fr05~EL_02_sum_sn	Fr05~EL_03_sum_sn	Fr06~UT_01_sum_sn
1	P01023	A2M	Alpha-2-macroglobulin OS=Homo sapiens OX=9606 GN=A2M PE=1 SV=3					2	6	3	0	0	0	1	0	0	0	0	140.157	142.442	163.977	229.531	220.181	60.3847	1723.23	1364.9	1205.39	1703.34	818.673	1486.54	584.688	484.859	454.008	683.376	422.874	577.199	0	0	0	0	0	0	0	0	0	0	0	0	0
2	Q9NRG9	AAAS	Aladin OS=Homo sapiens OX=9606 GN=AAAS PE=1 SV=1					1	1	4	2	2	4	2	3	4	3	3	30.0685	24.9831	24.878	35.1603	4.49596	25.5753	134.744	117.824	123.876	140.284	68.7314	118.532	322.078	264.684	296.947	332.897	308.023	271.262	120.147	118.334	113.567	135.804	152.304	121.96	185.712	181.35	204.465	202.846	223.692	178.915	402.627
3	Q86V21	AACS	Acetoacetyl-CoA synthetase OS=Homo sapiens OX=9606 GN=AACS PE=1 SV=1					1	0	0	0	0	0	0	0	0	0	0	91.5359	82.4713	81.2516	101.361	124.138	89.0137	0	0	0	0	0	0	0	0	0	0	0	0	0	0	0	0	0	0	0	0	0	0	0	0	0
4	Q8N5Z0	AADAT	Kynurenine/alpha-aminoadipate aminotransferase, mitochondrial OS=Homo sapiens OX=9606 GN=AADAT PE=1 SV=2					1	0	0	0	0	0	0	0	0	0	0	47.7629	49.5033	46.8521	52.5192	76.715	43.6153	0	0	0	0	0	0	0	0	0	0	0	0	0	0	0	0	0	0	0	0	0	0	0	0	0
5	Q6PD74	AAGAB	Alpha- and gamma-adaptin-binding protein p34 OS=Homo sapiens OX=9606 GN=AAGAB PE=1 SV=1					0	1	1	1	2	2	1	0	1	0	0	0	0	0	0	0	0	183.883	166.328	175.65	179.198	212.147	156.954	96.6758	89.668	71.6832	90.3988	81.4161	81.8309	49.7331	48.2503	46.7008	56.9381	54.799	59.1933	327.118	328.82	314.943	247.484	310.905	309.374	175.779
6	Q13685	AAMP	Angio-associated migratory cell protein OS=Homo sapiens OX=9606 GN=AAMP PE=1 SV=2					0	4	3	2	2	1	0	0	0	0	0	0	0	0	0	0	0	225.04	220.699	215.914	218.836	110.581	218.804	212.584	206.897	174.812	184.148	187.634	176.22	136.37	138.307	123.69	139.544	169.02	144.807	50.5981	53.6094	59.8559	59.5514	60.9374	49.9135	58.96
7	Q9Y312	AAR2	Protein AAR2 homolog OS=Homo sapiens OX=9606 GN=AAR2 PE=1 SV=2					0	4	2	2	3	0	3	1	0	1	1	0	0	0	0	0	0	166.883	157.132	150.69	173.126	198.057	154.134	280.989	265.853	227.24	330.041	267.991	273.5	222.933	236.301	230.65	276.295	258.253	246.26	156.16	141.445	159.274	172.66	162.56	171.082	0
8	P49588	AARS	Alanine--tRNA ligase, cytoplasmic OS=Homo sapiens OX=9606 GN=AARS PE=1 SV=2					4	5	2	1	2	1	0	0	0	0	0	126.661	130.626	123.722	136.693	29.1091	124.957	320.432	302.003	284.115	315.863	195.575	381.418	92.4106	89.4283	83.1632	90.6166	92.0151	91.5198	24.3583	25.8023	25.4543	32.9558	24.4124	26.3637	97.8004	96.9308	107.233	110.444	104.416	107.703	23.7417
9	Q9BTE6	AARSD1	Alanyl-tRNA editing protein Aarsd1 OS=Homo sapiens OX=9606 GN=AARSD1 PE=1 SV=2					1	1	3	3	3	3	4	2	1	0	3	23.0363	19.3129	17.5205	23.6302	8.7643	21.0105	51.1359	43.4213	47.8549	50.4758	16.9107	52.8653	181.797	172.016	178.817	200.034	184.404	176.417	133.274	135.342	145.121	153.559	158.439	147.833	234.492	229.001	260.811	240.65	275.567	251.244	173.247
10	Q9NRN7	AASDHPPT	L-aminoadipate-semialdehyde dehydrogenase-phosphopantetheinyl transferase OS=Homo sapiens OX=9606 GN=AASDHPPT PE=1 SV=2					3	0	1	0	0	0	0	0	0	0	0	406.839	407.101	417.806	446.72	211.163	415.613	0	0	0	0	0	0	134.482	147.538	124.28	146.279	132.845	144.051	0	0	0	0	0	0	0	0	0	0	0	0	0
11	Q9NRK6	ABCB10	ATP-binding cassette sub-family B member 10, mitochondrial OS=Homo sapiens OX=9606 GN=ABCB10 PE=1 SV=2					1	0	0	0	0	0	0	0	0	0	0	19.4829	24.1604	23.634	20.0864	34.5637	19.6981	0	0	0	0	0	0	0	0	0	0	0	0	0	0	0	0	0	0	0	0	0	0	0	0	0
12	P21439	ABCB4	Phosphatidylcholine translocator ABCB4 OS=Homo sapiens OX=9606 GN=ABCB4 PE=1 SV=2					0	0	1	0	0	0	0	0	0	0	0	0	0	0	0	0	0	0	0	0	0	0	0	85.597	72.2809	78.8014	88.266	83.4599	83.6845	0	0	0	0	0	0	0	0	0	0	0	0	0
13	O75027	ABCB7	ATP-binding cassette sub-family B member 7, mitochondrial OS=Homo sapiens OX=9606 GN=ABCB7 PE=1 SV=2					1	0	0	0	0	0	0	0	0	0	0	220.761	220.537	229.501	240.546	20.9459	216.134	0	0	0	0	0	0	0	0	0	0	0	0	0	0	0	0	0	0	0	0	0	0	0	0	0
14	P33527	ABCC1	Multidrug resistance-associated protein 1 OS=Homo sapiens OX=9606 GN=ABCC1 PE=1 SV=3					1	3	0	2	0	1	0	1	0	0	0	40.1795	45.6499	46.9194	54.2815	38.3271	39.3227	201.538	191.681	210.872	197.678	98.116	208.628	0	0	0	0	0	0	309.725	400.073	327.305	404.522	355.323	436.234	0	0	0	0	0	0	136.325
15	O15439	ABCC4	Multidrug resistance-associated protein 4 OS=Homo sapiens OX=9606 GN=ABCC4 PE=1 SV=3					0	0	1	0	0	0	0	0	0	0	0	0	0	0	0	0	0	0	0	0	0	0	0	20.732	22.5874	20.3436	17.6546	17.3899	20.9936	0	0	0	0	0	0	0	0	0	0	0	0	0
16	P28288	ABCD3	ATP-binding cassette sub-family D member 3 OS=Homo sapiens OX=9606 GN=ABCD3 PE=1 SV=1					0	3	2	4	1	3	3	4	2	5	5	0	0	0	0	0	0	203.534	212.933	227.844	223.474	253.985	225.306	281.392	261.285	255.652	271.119	250.86	293.495	303.097	340.572	360.528	394.787	366.385	426.363	125.948	153.169	177.157	221.831	190.712	211.197	162.848
17	P61221	ABCE1	ATP-binding cassette sub-family E member 1 OS=Homo sapiens OX=9606 GN=ABCE1 PE=1 SV=1					3	5	3	3	3	4	1	1	0	0	1	216.65	259.716	255.69	255.013	195.394	238.894	569.934	517.537	508.825	602.069	218.206	641.911	431.685	365.429	389.616	387.001	335.753	364.432	185.696	174.908	154.905	165.1	176.766	178.388	286.762	263.351	319.129	239.228	241.947	228.501	159.706
18	Q8NE71	ABCF1	ATP-binding cassette sub-family F member 1 OS=Homo sapiens OX=9606 GN=ABCF1 PE=1 SV=2					4	1	0	1	0	0	0	0	0	0	0	116.384	110.51	105.255	127.744	71.1197	117.528	109.329	97.7336	102.388	110.633	126.732	121.158	0	0	0	0	0	0	22.134	17.774	15.2163	33.8684	18.8275	26.3561	0	0	0	0	0	0	0
19	Q9UG63	ABCF2	ATP-binding cassette sub-family F member 2 OS=Homo sapiens OX=9606 GN=ABCF2 PE=1 SV=2					2	4	4	4	4	6	3	3	4	5	5	103.681	108.809	110.23	115.185	87.8228	93.8698	460.327	452.097	457.913	505.554	189.829	479.882	422.245	382.155	401.876	447.464	422.737	431.029	397.571	393.935	389.038	451.816	410.712	428.971	603.174	489.493	506.103	522.136	478.087	506.728	718.609
20	Q9NUQ8	ABCF3	ATP-binding cassette sub-family F member 3 OS=Homo sapiens OX=9606 GN=ABCF3 PE=1 SV=2					3	1	1	0	0	0	0	0	0	0	0	109.988	107.389	92.8102	110.963	28.6071	103.051	68.3501	61.9114	69.9871	73.106	22.1343	76.3651	12.6694	12.8201	10.2161	15.215	12.0141	12.9089	0	0	0	0	0	0	0	0	0	0	0	0	0
21	Q9NUJ1	ABHD10	Mycophenolic acid acyl-glucuronide esterase, mitochondrial OS=Homo sapiens OX=9606 GN=ABHD10 PE=1 SV=1					2	2	0	0	0	0	0	0	0	0	0	76.4461	95.4629	92.7325	91.4393	144.762	78.7146	314.912	327.72	316.812	322.521	78.7367	378.673	0	0	0	0	0	0	0	0	0	0	0	0	0	0	0	0	0	0	0
22	Q8N2K0	ABHD12	Monoacylglycerol lipase ABHD12 OS=Homo sapiens OX=9606 GN=ABHD12 PE=1 SV=2					0	0	1	0	1	1	0	0	0	0	0	0	0	0	0	0	0	0	0	0	0	0	0	42.9658	42.3721	38.0905	49.3926	46.8602	39.9719	0	0	0	0	0	0	30.8626	32.7206	31.6589	34.4615	33.9482	32.5648	28.1199
23	Q96IU4	ABHD14B	Protein ABHD14B OS=Homo sapiens OX=9606 GN=ABHD14B PE=1 SV=1					3	3	1	3	2	1	1	1	1	0	0	257.242	238.871	250.503	314.787	23.6205	262.227	355.994	352.857	352.364	388.118	188.705	362.932	209.047	200.006	186.147	223.797	217.566	214.118	280.073	258.206	302.118	295.68	310.778	294.557	214.123	203.767	216.984	212.006	240.936	223.421	182.023
24	Q8IZP0	ABI1	Abl interactor 1 OS=Homo sapiens OX=9606 GN=ABI1 PE=1 SV=4					0	1	2	2	2	1	2	1	0	0	1	0	0	0	0	0	0	172.268	140.678	140.644	186.992	213.014	202.071	147.725	112.319	115.019	157.217	132.53	155.543	126.635	112.704	103.667	163.054	141.794	152.561	164.908	137.025	163.639	186.607	163.697	182.762	110.741
25	Q15018	ABRAXAS2	BRISC complex subunit Abraxas 2 OS=Homo sapiens OX=9606 GN=ABRAXAS2 PE=1 SV=2					1	0	0	1	0	1	0	2	0	0	0	15.0431	14.5337	13.89	16.3228	18.6962	11.2195	0	0	0	0	0	0	0	0	0	0	0	0	13.0691	13.7205	12.5238	15.4287	14.2049	13.7051	0	0	0	0	0	0	56.2025
26	P09110	ACAA1	3-ketoacyl-CoA thiolase, peroxisomal OS=Homo sapiens OX=9606 GN=ACAA1 PE=1 SV=2					3	3	1	1	1	0	0	0	0	0	0	159.803	152.862	151.696	172.001	89.0434	157.463	182.715	180.54	178.834	184.826	151.684	192.082	34.719	30.245	30.9896	35.734	34.4191	35.2929	133.196	128.924	136.716	167.306	186.786	171.149	49.7511	52.1977	51.0064	53.8954	63.3679	60.7204	0
27	Q13085	ACACA	Acetyl-CoA carboxylase 1 OS=Homo sapiens OX=9606 GN=ACACA PE=1 SV=2					0	4	4	5	4	4	3	4	4	3	3	0	0	0	0	0	0	303.957	265.509	261.138	318.995	86.2059	282.801	134.842	119.964	110.547	151.078	138.429	141.75	220.267	227.879	221.508	287.106	266.759	253.634	268.956	230.083	268.34	256.819	271.65	258.008	471.499
28	O00763	ACACB	Acetyl-CoA carboxylase 2 OS=Homo sapiens OX=9606 GN=ACACB PE=1 SV=3					0	4	4	4	4	0	2	3	3	2	2	0	0	0	0	0	0	151.228	144.749	140.866	159.807	169.389	157.533	321.092	293.742	258.723	332.087	282.676	300.508	204.903	221.678	193.847	262.406	275.053	253.26	261.438	284.13	281.7	328.894	339.916	320.52	0
29	Q6JQN1	ACAD10	Acyl-CoA dehydrogenase family member 10 OS=Homo sapiens OX=9606 GN=ACAD10 PE=1 SV=1					0	0	0	0	0	0	1	0	0	0	0	0	0	0	0	0	0	0	0	0	0	0	0	0	0	0	0	0	0	0	0	0	0	0	0	0	0	0	0	0	0	0
30	Q709F0	ACAD11	Acyl-CoA dehydrogenase family member 11 OS=Homo sapiens OX=9606 GN=ACAD11 PE=1 SV=3					0	0	1	0	0	0	0	0	0	1	0	0	0	0	0	0	0	0	0	0	0	0	0	14.7773	17.0639	13.1629	18.2869	14.3643	18.2571	0	0	0	0	0	0	0	0	0	0	0	0	0
31	Q9H845	ACAD9	Acyl-CoA dehydrogenase family member 9, mitochondrial OS=Homo sapiens OX=9606 GN=ACAD9 PE=1 SV=1					2	2	1	3	2	3	2	3	2	0	1	128.809	134.66	136.878	136.903	183.948	116.127	247.088	225.094	241.257	248.304	296.258	222.169	31.1604	33.6321	33.3679	33.4968	31.4531	34.4032	193.134	180.388	182.642	211.139	196.747	207.515	134.013	133.247	156.77	165.622	142.415	148.674	310.722
32	P11310	ACADM	Medium-chain specific acyl-CoA dehydrogenase, mitochondrial OS=Homo sapiens OX=9606 GN=ACADM PE=1 SV=1					1	2	2	2	2	4	2	0	0	0	0	28.3809	28.1399	23.1999	23.6295	0	26.131	158.36	154.187	145.13	163.341	207.095	164.584	75.0213	59.8333	64.9837	85.5781	72.1163	63.8037	112.567	101.13	109.418	126.921	109.308	119.265	268.059	233.576	277.246	306.027	259.831	257.669	418.034
33	P16219	ACADS	Short-chain specific acyl-CoA dehydrogenase, mitochondrial OS=Homo sapiens OX=9606 GN=ACADS PE=1 SV=1					2	0	0	0	0	0	0	0	0	0	0	113.287	105.336	114.602	120.608	199.028	99.029	0	0	0	0	0	0	0	0	0	0	0	0	0	0	0	0	0	0	0	0	0	0	0	0	0
34	P45954	ACADSB	Short/branched chain specific acyl-CoA dehydrogenase, mitochondrial OS=Homo sapiens OX=9606 GN=ACADSB PE=1 SV=1					1	2	4	3	2	0	1	1	1	1	1	31.0108	32.2225	27.6093	39.9228	51.8407	30.2893	115.548	100.727	108.496	113.573	167.49	111.13	212.601	195.338	169.141	215.983	214.724	198.758	141.42	144.299	123.531	138.643	165.816	155.158	138.923	126.475	137.972	137.719	143.854	126.066	0
35	P49748	ACADVL	Very long-chain specific acyl-CoA dehydrogenase, mitochondrial OS=Homo sapiens OX=9606 GN=ACADVL PE=1 SV=1					2	2	0	0	0	0	0	0	0	0	0	238.681	233.466	218.438	248.928	296.417	221.057	147.028	148.625	131.959	140.326	151.304	168.19	0	0	0	0	0	0	0	0	0	0	0	0	0	0	0	0	0	0	0
36	Q15057	ACAP2	Arf-GAP with coiled-coil, ANK repeat and PH domain-containing protein 2 OS=Homo sapiens OX=9606 GN=ACAP2 PE=1 SV=3					1	1	0	0	0	0	0	0	0	0	0	46.3579	41.7674	41.5674	51.6716	13.7669	40.8637	36.0481	35.6555	34.8691	39.105	32.1844	43.5091	0	0	0	0	0	0	0	0	0	0	0	0	0	0	0	0	0	0	0
37	P24752	ACAT1	Acetyl-CoA acetyltransferase, mitochondrial OS=Homo sapiens OX=9606 GN=ACAT1 PE=1 SV=1					1	5	1	3	4	4	3	3	3	4	3	19.0407	19.0172	18.3112	22.8291	21.1648	15.6659	387.558	367.505	343.624	403.406	238.08	376.98	115.334	100.52	99.0069	108.576	101.849	103.182	199.88	187.258	178.904	225.562	192.196	200.383	549.445	499.076	507.747	526.489	523.699	515.72	399.234
38	Q9BWD1	ACAT2	Acetyl-CoA acetyltransferase, cytosolic OS=Homo sapiens OX=9606 GN=ACAT2 PE=1 SV=2					1	4	3	3	2	2	1	1	1	0	0	88.6468	86.8194	96.5197	111.403	6.07526	93.972	197.845	188.241	182.887	206.851	156.477	209.147	298.644	241.538	262.241	301.493	278.29	284.231	375.665	313.377	365.712	377.105	376.62	341.511	225.304	222.806	241.356	242.956	257.653	237.201	256.305
39	Q9H3P7	ACBD3	Golgi resident protein GCP60 OS=Homo sapiens OX=9606 GN=ACBD3 PE=1 SV=4					2	2	0	0	0	0	0	0	0	0	0	64.1743	63.1145	59.7969	62.2158	47.4697	61.6394	89.1541	81.9201	92.8284	88.6751	0	92.6511	0	0	0	0	0	0	0	0	0	0	0	0	0	0	0	0	0	0	0
40	Q9BR61	ACBD6	Acyl-CoA-binding domain-containing protein 6 OS=Homo sapiens OX=9606 GN=ACBD6 PE=1 SV=1					0	0	2	0	0	0	0	0	0	0	0	0	0	0	0	0	0	0	0	0	0	0	0	131.394	127.52	117.656	145.552	134.611	142.095	0	0	0	0	0	0	0	0	0	0	0	0	0
41	Q96AP0	ACD	Adrenocortical dysplasia protein homolog OS=Homo sapiens OX=9606 GN=ACD PE=1 SV=3					0	0	0	0	1	0	0	1	0	0	0	0	0	0	0	0	0	0	0	0	0	0	0	0	0	0	0	0	0	0	0	0	0	0	0	133.149	119.905	136.562	117.376	134.462	110.032	0
42	Q9UKV3	ACIN1	Apoptotic chromatin condensation inducer in the nucleus OS=Homo sapiens OX=9606 GN=ACIN1 PE=1 SV=2					0	0	0	1	4	2	3	0	2	0	2	0	0	0	0	0	0	0	0	0	0	0	0	0	0	0	0	0	0	80.4225	67.9489	74.5262	108.799	102.488	97.2834	308.121	263.077	293.91	375.631	382.625	329.701	190.311
43	P53396	ACLY	ATP-citrate synthase OS=Homo sapiens OX=9606 GN=ACLY PE=1 SV=3					1	4	3	3	3	3	3	4	3	3	2	37.4654	34.1903	36.1513	36.8289	46.4304	28.9033	419.601	376.259	378.994	431.887	155.514	500.823	433.577	458.217	436.012	398.208	438.371	342.984	282.034	297.245	324.133	286.478	329.083	246.91	356.26	398.54	443.25	350.74	385.81	313.606	346.462
44	P21399	ACO1	Cytoplasmic aconitate hydratase OS=Homo sapiens OX=9606 GN=ACO1 PE=1 SV=3					0	4	2	0	0	0	0	0	0	0	0	0	0	0	0	0	0	274.073	255.747	250.226	251.43	260.308	289.675	105.641	104.269	87.0249	106.72	92.6939	108.273	0	0	0	0	0	0	0	0	0	0	0	0	0
45	Q99798	ACO2	Aconitate hydratase, mitochondrial OS=Homo sapiens OX=9606 GN=ACO2 PE=1 SV=2					4	1	0	0	0	0	0	0	0	0	0	141.323	150.145	131.021	141.837	126.188	137.459	19.9979	19.4601	19.7402	18.4832	9.98492	24.0039	0	0	0	0	0	0	0	0	0	0	0	0	0	0	0	0	0	0	0
46	Q8WXI4	ACOT11	Acyl-coenzyme A thioesterase 11 OS=Homo sapiens OX=9606 GN=ACOT11 PE=1 SV=1					0	0	4	1	1	0	3	3	2	0	1	0	0	0	0	0	0	0	0	0	0	0	0	248.27	238.292	204.643	292.967	237.819	257.069	82.9269	87.2646	83.7237	96.8296	98.8049	85.4758	126.359	101.424	124.376	133.544	123.139	123.799	0
47	Q9NPJ3	ACOT13	Acyl-coenzyme A thioesterase 13 OS=Homo sapiens OX=9606 GN=ACOT13 PE=1 SV=1					3	0	0	0	0	0	0	0	0	0	0	240.122	262.121	245.166	269.107	455.877	251.944	0	0	0	0	0	0	0	0	0	0	0	0	0	0	0	0	0	0	0	0	0	0	0	0	0
48	O00154	ACOT7	Cytosolic acyl coenzyme A thioester hydrolase OS=Homo sapiens OX=9606 GN=ACOT7 PE=1 SV=3					2	5	4	4	3	4	3	4	3	4	3	64.0451	65.328	55.9122	66.8065	44.6234	64.8092	481.131	446.599	448.171	492.413	234.353	458.678	172.195	163.923	175.887	202.342	177.45	168.641	358.007	379.104	365.44	418.736	431.428	361.974	150.802	176.835	177.547	184.197	185.904	158.665	311.161
49	Q9Y305	ACOT9	Acyl-coenzyme A thioesterase 9, mitochondrial OS=Homo sapiens OX=9606 GN=ACOT9 PE=1 SV=2					3	2	2	0	0	1	0	0	0	0	0	451.973	471.735	480.356	517.896	831.475	409.734	462.206	475.662	408.888	497.47	614.637	571.364	488.628	505.321	446.943	578.737	468.668	488.273	0	0	0	0	0	0	0	0	0	0	0	0	119.88
50	P24666	ACP1	Low molecular weight phosphotyrosine protein phosphatase OS=Homo sapiens OX=9606 GN=ACP1 PE=1 SV=3				Phosphatase	2	0	3	4	3	3	3	4	3	3	3	44.3975	39.8245	39.1498	47.1098	27.8159	35.4461	0	0	0	0	0	0	141.592	126.617	105.967	155.118	118.033	107.234	310.162	292.296	299.297	402.159	357.003	348.973	592.251	562.914	617.022	703.968	640.9	592.891	363.709
51	Q4G176	ACSF3	Acyl-CoA synthetase family member 3, mitochondrial OS=Homo sapiens OX=9606 GN=ACSF3 PE=1 SV=3					2	0	0	0	0	0	0	0	0	0	0	99.655	102.68	85.7352	104.872	21.3594	95.4591	0	0	0	0	0	0	0	0	0	0	0	0	0	0	0	0	0	0	0	0	0	0	0	0	0
52	P33121	ACSL1	Long-chain-fatty-acid--CoA ligase 1 OS=Homo sapiens OX=9606 GN=ACSL1 PE=1 SV=1					0	1	4	1	1	1	0	1	2	1	0	0	0	0	0	0	0	104.534	90.4498	93.8613	110.91	137.065	104.94	381.377	339.786	340.779	407.019	397.675	373.149	170.781	156.534	157.864	185.434	175.896	189.574	47.0129	49.2894	57.9828	57.2811	57.7307	51.9817	60.6777
53	O95573	ACSL3	Long-chain-fatty-acid--CoA ligase 3 OS=Homo sapiens OX=9606 GN=ACSL3 PE=1 SV=3					1	1	3	5	5	2	4	4	4	3	5	82.6899	90.1065	77.4867	102.507	147.443	87.1065	50.5438	58.0546	53.0814	64.5165	2.72551	51.9459	169.722	148.63	106.107	188.054	151.685	162.846	372.017	352.801	349.329	417.682	413.908	377.193	245.763	239.831	269.107	293.866	275.239	279.378	144.824
54	O60488	ACSL4	Long-chain-fatty-acid--CoA ligase 4 OS=Homo sapiens OX=9606 GN=ACSL4 PE=1 SV=2					0	1	2	3	2	2	2	2	2	2	2	0	0	0	0	0	0	15.7056	13.899	15.0732	14.7333	10.9804	17.1093	206.627	177.846	197.289	215.926	204.412	183.524	169.372	164.371	157.295	214.428	183.979	188.466	334.074	313.774	322.744	368.039	357.635	331.036	86.8475
55	Q9ULC5	ACSL5	Long-chain-fatty-acid--CoA ligase 5 OS=Homo sapiens OX=9606 GN=ACSL5 PE=1 SV=1					3	2	2	2	2	2	2	1	1	1	1	221.49	219.285	192.252	247.833	176.146	199.082	212.106	198.22	186.934	216.754	255.373	201.572	131.866	129.131	114.953	136.584	136.168	123.479	57.3562	56.6981	75.6068	82.2936	79.2881	63.9845	156.742	174.352	193.188	196.767	193.38	188.635	203.546
56	Q9UKU0	ACSL6	Long-chain-fatty-acid--CoA ligase 6 OS=Homo sapiens OX=9606 GN=ACSL6 PE=2 SV=4					0	0	1	0	0	0	0	0	0	0	0	0	0	0	0	0	0	0	0	0	0	0	0	232.293	231.993	183.573	159.77	181.779	196.164	0	0	0	0	0	0	0	0	0	0	0	0	0
57	P68133	ACTA1	Actin, alpha skeletal muscle OS=Homo sapiens OX=9606 GN=ACTA1 PE=1 SV=1					6	8	8	8	9	8	8	7	9	9	7	493.335	479.069	560.12	544.662	708.668	438.797	1645.24	1566.05	1508.52	1528.6	951.14	1617.23	1491.9	1333.65	1471.47	1426.95	1435.83	1377.04	1867.53	1585.62	1819.58	2142.16	1914.53	1706.67	2685.1	2832.15	2583.97	2687.46	2497.73	2492.13	2050.5
58	P63261	ACTG1	Actin, cytoplasmic 2 OS=Homo sapiens OX=9606 GN=ACTG1 PE=1 SV=1					2	4	3	3	2	4	2	2	3	4	3	40.8422	284.885	40.7683	61.0027	5.65399	71.3019	478.539	448.543	449.623	447.541	1036.4	449.885	226.608	197.034	173.705	223.359	200.395	186.352	152.661	165.812	157.371	181.053	163.888	164.668	184.195	203.706	199.208	223.406	192.406	190.945	342.066
59	O96019	ACTL6A	Actin-like protein 6A OS=Homo sapiens OX=9606 GN=ACTL6A PE=1 SV=1					2	2	2	4	2	2	5	2	2	3	1	55.7749	62.177	62.2974	71.6324	54.5077	58.4337	54.3682	54.9338	62.8876	73.4727	10.1774	62.2746	47.4258	46.7282	40.6075	46.6235	44.0519	43.3503	74.716	71.0176	69.5107	80.3953	66.9487	67.2677	253.856	224.627	229.16	216.582	214.71	197.004	56.5388
60	P12814	ACTN1	Alpha-actinin-1 OS=Homo sapiens OX=9606 GN=ACTN1 PE=1 SV=2					2	1	2	1	0	0	0	0	0	0	0	44.7461	61.6094	61.5362	61.6392	26.5	67.6822	65.518	55.2903	55.7397	63.654	56.6492	65.6561	186.632	176.978	177.394	236.97	210.519	218.888	55.9916	47.6738	51.3137	61.7852	59.4242	56.6726	0	0	0	0	0	0	0
61	P35609	ACTN2	Alpha-actinin-2 OS=Homo sapiens OX=9606 GN=ACTN2 PE=1 SV=1					1	0	0	0	0	0	0	0	0	0	0	738.458	544.013	625.833	656.947	792.799	631.243	0	0	0	0	0	0	0	0	0	0	0	0	0	0	0	0	0	0	0	0	0	0	0	0	0
62	O43707	ACTN4	Alpha-actinin-4 OS=Homo sapiens OX=9606 GN=ACTN4 PE=1 SV=2					5	3	4	6	5	5	6	7	5	5	5	508.174	479.476	568.353	710.691	41.8439	702.637	176.064	160.17	154.535	191.391	70.211	218.37	122.67	106.108	117.511	152.78	116.544	156.215	434.736	452.021	448.349	615.773	515.224	621.065	534.641	540.264	586.522	749.174	596.144	762.896	567.422
63	Q9NZ32	ACTR10	Actin-related protein 10 OS=Homo sapiens OX=9606 GN=ACTR10 PE=1 SV=1					0	2	2	2	3	2	0	0	0	0	0	0	0	0	0	0	0	220.314	196.42	196.091	256.308	59.976	194.883	280.172	240.512	235.305	250.593	271.807	260.296	89.7164	97.7932	96.5133	105.326	92.4647	105.702	312.193	293.689	304.999	302.248	323.161	304.995	218.246
64	P61163	ACTR1A	Alpha-centractin OS=Homo sapiens OX=9606 GN=ACTR1A PE=1 SV=1					0	3	3	4	3	3	3	3	4	4	2	0	0	0	0	0	0	978.245	928.564	949.095	1139.74	468.278	948.853	622.036	600.491	564.481	680.833	598.638	615.146	535.602	549.277	542.206	614.924	644.682	608.952	336.834	294.074	300.017	288.267	318.598	291.684	240.731
65	P42025	ACTR1B	Beta-centractin OS=Homo sapiens OX=9606 GN=ACTR1B PE=1 SV=1					0	1	0	0	0	0	0	0	0	0	0	0	0	0	0	0	0	43.6399	39.0904	45.9502	45.4491	62.191	45.7368	0	0	0	0	0	0	0	0	0	0	0	0	0	0	0	0	0	0	0
66	P61160	ACTR2	Actin-related protein 2 OS=Homo sapiens OX=9606 GN=ACTR2 PE=1 SV=1					4	3	2	1	0	0	0	0	0	0	2	307.17	296.694	295.521	328.367	339.467	282.828	347.39	337.294	309.658	344.332	343.168	403.18	142.197	121.601	119.422	143.439	121.421	139.82	107.824	104.105	106.985	116.639	124.773	116.141	0	0	0	0	0	0	0
67	P61158	ACTR3	Actin-related protein 3 OS=Homo sapiens OX=9606 GN=ACTR3 PE=1 SV=3					1	5	4	4	6	1	5	4	4	3	4	23.7799	22.6011	20.5835	30.9416	2.60415	24.2499	434.308	435.161	382.26	443.751	253.364	495.291	267.197	260.263	214.388	250.619	215.294	230.509	617.859	742.904	630.744	715.427	732.949	695.35	478.157	491.637	539.777	542.672	494.302	443.689	73.5708
68	Q9GZN1	ACTR6	Actin-related protein 6 OS=Homo sapiens OX=9606 GN=ACTR6 PE=1 SV=1					0	1	0	0	0	0	0	0	0	0	0	0	0	0	0	0	0	14.4374	21.7828	18.8522	21.0472	23.5833	24.4095	0	0	0	0	0	0	0	0	0	0	0	0	0	0	0	0	0	0	0
69	Q9H981	ACTR8	Actin-related protein 8 OS=Homo sapiens OX=9606 GN=ACTR8 PE=1 SV=2					0	0	1	0	0	0	0	0	0	0	0	0	0	0	0	0	0	0	0	0	0	0	0	33.5161	34.1841	29.2067	40.9285	33.5664	35.6583	0	0	0	0	0	0	0	0	0	0	0	0	0
70	P00813	ADA	Adenosine deaminase OS=Homo sapiens OX=9606 GN=ADA PE=1 SV=3					2	0	0	0	0	0	0	0	0	0	0	173.279	268.224	273.879	266.409	278.484	238.481	0	0	0	0	0	0	0	0	0	0	0	0	0	0	0	0	0	0	0	0	0	0	0	0	0
71	P55265	ADAR	Double-stranded RNA-specific adenosine deaminase OS=Homo sapiens OX=9606 GN=ADAR PE=1 SV=4					1	3	3	2	3	5	3	4	2	2	4	46.0235	54.6709	52.1272	66.0869	73.9209	56.4795	344.838	333.502	345.725	360.804	292.414	344.059	658.245	585.633	616.897	688.943	684.762	594.988	353.967	315.186	304.53	378.889	383.614	338.795	173.914	172.722	184.68	169.302	178.027	158.346	446.942
72	Q9UEY8	ADD3	Gamma-adducin OS=Homo sapiens OX=9606 GN=ADD3 PE=1 SV=1					2	0	0	0	0	0	0	1	0	0	0	58.6402	68.2749	58.3117	74.4811	100.46	59.8147	0	0	0	0	0	0	0	0	0	0	0	0	0	0	0	0	0	0	0	0	0	0	0	0	0
73	Q86SQ4	ADGRG6	Adhesion G-protein coupled receptor G6 OS=Homo sapiens OX=9606 GN=ADGRG6 PE=1 SV=3					0	0	1	0	0	0	0	0	0	0	0	0	0	0	0	0	0	0	0	0	0	0	0	127.367	108.97	123.63	129.611	112.413	117.636	0	0	0	0	0	0	0	0	0	0	0	0	0
74	P11766	ADH5	Alcohol dehydrogenase class-3 OS=Homo sapiens OX=9606 GN=ADH5 PE=1 SV=4					4	3	1	2	2	0	0	0	0	0	0	1077.03	1115.89	1041.41	1186.16	1497.89	1103.65	196.46	191.065	175.712	195.504	220.136	216.622	78.2824	81.5082	91.9646	96.079	90.1823	89.9154	105.601	107.746	105.424	133.431	122.969	115.411	102.429	106.221	126.425	118.734	113.986	119.689	0
75	Q9BV57	ADI1	1,2-dihydroxy-3-keto-5-methylthiopentene dioxygenase OS=Homo sapiens OX=9606 GN=ADI1 PE=1 SV=1					2	0	0	0	0	0	0	0	0	0	0	46.63	60.8597	60.644	64.5439	155.54	57.1314	0	0	0	0	0	0	0	0	0	0	0	0	0	0	0	0	0	0	0	0	0	0	0	0	0
76	Q15847	ADIRF	Adipogenesis regulatory factor OS=Homo sapiens OX=9606 GN=ADIRF PE=1 SV=1					1	3	1	0	0	0	0	0	0	0	0	23.2097	33.8375	30.9428	25.4558	34.2689	32.763	51.5584	49.8615	45.8785	48.6932	81.6219	70.0223	30.066	34.8891	34.9262	39.3008	53.9254	43.1817	0	0	0	0	0	0	0	0	0	0	0	0	0
77	P55263	ADK	Adenosine kinase OS=Homo sapiens OX=9606 GN=ADK PE=1 SV=2					3	0	2	0	0	0	0	0	0	0	0	150.416	155.998	158.344	167.133	182.456	149.464	0	0	0	0	0	0	92.2808	99.4975	82.5902	104.781	100.283	98.2269	0	0	0	0	0	0	0	0	0	0	0	0	0
78	Q9H2P0	ADNP	Activity-dependent neuroprotector homeobox protein OS=Homo sapiens OX=9606 GN=ADNP PE=1 SV=1					0	2	3	3	1	4	4	2	2	2	0	0	0	0	0	0	0	135.442	132.98	137.788	149.651	112.642	135.046	195.179	183.334	175.555	206.063	194.693	168.361	135.671	118.41	152.699	159.943	155.202	119.646	83.9777	78.1959	89.4378	74.0165	86.3288	68.5343	340.513
79	Q9BRR6	ADPGK	ADP-dependent glucokinase OS=Homo sapiens OX=9606 GN=ADPGK PE=1 SV=1					1	0	0	0	0	0	0	0	0	0	0	24.2568	21.7628	26.3311	24.08	23.5009	19.922	0	0	0	0	0	0	0	0	0	0	0	0	0	0	0	0	0	0	0	0	0	0	0	0	0
80	Q9NX46	ADPRHL2	ADP-ribose glycohydrolase ARH3 OS=Homo sapiens OX=9606 GN=ADPRHL2 PE=1 SV=1					1	0	0	0	0	0	0	0	0	0	0	28.6722	29.943	23.8271	27.9624	5.92697	27.3333	0	0	0	0	0	0	0	0	0	0	0	0	0	0	0	0	0	0	0	0	0	0	0	0	0
81	Q16186	ADRM1	Proteasomal ubiquitin receptor ADRM1 OS=Homo sapiens OX=9606 GN=ADRM1 PE=1 SV=2					3	2	2	3	1	1	0	1	0	0	0	258.655	264.011	254.056	249.405	285.114	217.057	231.796	214.658	213.113	277.051	363.811	240.768	174.73	156.4	137.136	185.906	149.912	196.478	217.235	240.937	221.035	274.966	265.77	316.014	45.0074	45.1156	43.3922	41.4945	42.6442	48.3057	76.2235
82	P30566	ADSL	Adenylosuccinate lyase OS=Homo sapiens OX=9606 GN=ADSL PE=1 SV=2					0	4	1	2	1	3	2	4	3	4	2	0	0	0	0	0	0	158.873	155.57	146.364	173.371	125.558	174.395	18.7722	17.0175	20.703	18.8274	19.9674	16.4669	46.6656	56.1828	46.351	57.073	53.9378	56.5763	26.3442	27.1907	30.3838	26.6931	33.2888	31.2889	123.942
83	P30520	ADSS	Adenylosuccinate synthetase isozyme 2 OS=Homo sapiens OX=9606 GN=ADSS PE=1 SV=3					3	6	5	5	4	2	4	2	4	4	4	376.308	322.499	343.192	437.503	59.3637	353.863	452.707	449.505	440.143	470.671	204.315	489.746	294.201	274.244	267.536	295.583	280.689	307.167	443.55	408.98	432.792	467.631	494.239	488.116	324.597	313.266	351.441	340.786	363.942	368.351	170.438
84	P55196	AFDN	Afadin OS=Homo sapiens OX=9606 GN=AFDN PE=1 SV=3					1	0	1	0	0	0	0	0	0	0	0	28.4055	29.9797	37.5289	33.4957	6.94642	29.1187	0	0	0	0	0	0	41.1319	43.5438	43.9897	56.0926	49.9319	46.0792	0	0	0	0	0	0	0	0	0	0	0	0	0
85	Q9Y4W6	AFG3L2	AFG3-like protein 2 OS=Homo sapiens OX=9606 GN=AFG3L2 PE=1 SV=2					1	1	3	3	0	4	1	1	3	1	2	71.9228	74.7616	77.0753	79.7299	6.51865	58.0915	113.309	121.513	118.905	127.767	43.4099	126.767	144.775	122.197	116.198	139.073	110.629	145.182	180.714	186.091	164.786	191.285	191.603	224.882	0	0	0	0	0	0	303.931
86	Q96P47	AGAP3	Arf-GAP with GTPase, ANK repeat and PH domain-containing protein 3 OS=Homo sapiens OX=9606 GN=AGAP3 PE=1 SV=2					0	2	2	1	1	1	1	1	1	0	1	0	0	0	0	0	0	146.992	134.654	147.338	156.435	80.8096	151.648	54.4092	43.5541	44.5285	51.4229	48.6063	48.0013	75.2733	72.4487	69.2107	100.936	97.1469	95.6987	122.257	120.914	132.701	150.763	149.369	163.642	127.875
87	P52594	AGFG1	Arf-GAP domain and FG repeat-containing protein 1 OS=Homo sapiens OX=9606 GN=AGFG1 PE=1 SV=2					1	0	0	0	1	1	0	1	0	0	0	30.33	27.6191	23.8749	29.5474	0	28.112	0	0	0	0	0	0	0	0	0	0	0	0	0	0	0	0	0	0	37.4397	30.6577	46.282	36.0385	32.9526	29.0151	27.7781
88	Q53H12	AGK	Acylglycerol kinase, mitochondrial OS=Homo sapiens OX=9606 GN=AGK PE=1 SV=2					0	0	2	2	2	4	3	2	2	1	1	0	0	0	0	0	0	0	0	0	0	0	0	120.392	128.098	123.407	119.198	109.731	114.683	249.265	285.579	297.747	349.914	342.702	327.504	304.1	319.207	385.778	352.183	359.582	346.478	527.044
89	P35573	AGL	Glycogen debranching enzyme OS=Homo sapiens OX=9606 GN=AGL PE=1 SV=3					0	2	1	1	1	2	1	2	1	0	0	0	0	0	0	0	0	150.925	143.137	140.116	152.45	190.801	147.8	50.8837	48.94	46.3637	52.4145	54.3985	48.8144	106.638	125.149	117.272	145.87	155.062	140.708	119.506	126.432	126.712	123.549	131.135	137.111	161.626
90	Q9UL18	AGO1	Protein argonaute-1 OS=Homo sapiens OX=9606 GN=AGO1 PE=1 SV=3					0	0	0	0	0	0	0	0	1	0	0	0	0	0	0	0	0	0	0	0	0	0	0	0	0	0	0	0	0	0	0	0	0	0	0	0	0	0	0	0	0	0
91	Q9UKV8	AGO2	Protein argonaute-2 OS=Homo sapiens OX=9606 GN=AGO2 PE=1 SV=3					0	2	3	2	2	1	5	7	3	6	5	0	0	0	0	0	0	159.96	156.185	160.354	182.85	217.131	179.044	83.9018	82.3405	74.5881	91.343	75.0215	81.5798	147.508	131.896	144.603	172.725	151.306	136.205	306.717	323.002	325.272	345.176	296.825	303.669	70.1722
92	Q9NUQ2	AGPAT5	1-acyl-sn-glycerol-3-phosphate acyltransferase epsilon OS=Homo sapiens OX=9606 GN=AGPAT5 PE=1 SV=3					0	0	3	3	1	0	0	0	0	0	0	0	0	0	0	0	0	0	0	0	0	0	0	51.6743	50.9261	52.2975	62.5924	56.6082	52.1271	77.9034	80.9293	94.2023	87.4352	94.4364	82.3786	11.0638	14.2403	15.5157	14.195	17.0123	12.8667	0
93	O00116	AGPS	Alkyldihydroxyacetonephosphate synthase, peroxisomal OS=Homo sapiens OX=9606 GN=AGPS PE=1 SV=1					1	4	2	4	4	4	4	3	4	3	1	47.9316	46.9601	49.9047	55.8618	46.1581	50.2282	166.878	147.081	147.9	153.362	161.02	146.617	128.938	113.251	129.37	139.125	128.492	119.431	221.329	192.324	194.213	224.432	233.44	213.025	377.436	358.894	380.416	358.807	384.433	333.836	401.6
94	Q6RW13	AGTRAP	Type-1 angiotensin II receptor-associated protein OS=Homo sapiens OX=9606 GN=AGTRAP PE=1 SV=1					1	0	0	0	0	0	0	0	0	0	0	26.5632	27.2111	25.5677	30.8185	0	23.2495	0	0	0	0	0	0	0	0	0	0	0	0	0	0	0	0	0	0	0	0	0	0	0	0	0
95	Q8WYP5	AHCTF1	Protein ELYS OS=Homo sapiens OX=9606 GN=AHCTF1 PE=1 SV=3					0	0	0	0	1	0	0	1	2	2	2	0	0	0	0	0	0	0	0	0	0	0	0	0	0	0	0	0	0	0	0	0	0	0	0	130.298	129.202	162.455	109.784	119.335	134.316	0
96	P23526	AHCY	Adenosylhomocysteinase OS=Homo sapiens OX=9606 GN=AHCY PE=1 SV=4					3	4	3	3	1	0	2	0	0	0	0	554.193	526.462	557.687	615.272	750.302	528.422	949.688	1001.59	872.896	1012.85	1111.03	1230.26	466.983	429.181	498.978	547.875	488.825	477.282	477.458	470.571	514.868	582.767	533.286	507.628	92.7203	82.3978	122.626	107.045	104.838	88.6939	0
97	O43865	AHCYL1	S-adenosylhomocysteine hydrolase-like protein 1 OS=Homo sapiens OX=9606 GN=AHCYL1 PE=1 SV=2					2	1	1	1	1	1	0	0	0	0	0	250.023	238.557	253.082	284.438	26.8376	251.62	132.707	136.17	115.708	123.692	12.688	165.019	122.188	122.411	98.4692	126.039	122.551	116.123	97.2666	114.242	98.5208	126.125	119.853	110.347	53.701	45.8095	52.8698	46.4486	46.1708	44.7671	97.2048
98	Q09666	AHNAK	Neuroblast differentiation-associated protein AHNAK OS=Homo sapiens OX=9606 GN=AHNAK PE=1 SV=2					4	5	4	3	2	1	1	3	3	2	2	253.029	270.086	245.099	289.279	339.362	229.577	420.058	410.41	404.142	389.486	462.474	423.406	207.822	188.41	208.46	208.489	247.713	233.175	208.574	198.044	206.408	208.904	224.912	207.193	224.895	226.162	225.859	189.438	239.309	203.252	263.097
99	P35869	AHR	Aryl hydrocarbon receptor OS=Homo sapiens OX=9606 GN=AHR PE=1 SV=2					0	0	1	0	0	0	0	0	0	0	0	0	0	0	0	0	0	0	0	0	0	0	0	110.047	114.595	55.105	119.261	96.2776	95.1261	0	0	0	0	0	0	0	0	0	0	0	0	0
100	O95433	AHSA1	Activator of 90 kDa heat shock protein ATPase homolog 1 OS=Homo sapiens OX=9606 GN=AHSA1 PE=1 SV=1					3	4	5	4	3	3	4	4	4	2	3	211.043	207.003	203.086	228.937	70.7718	200.018	243.199	214.765	198.598	205.732	277.264	194.112	326.331	303.363	306.156	331.607	299.144	306.043	199.798	231.045	232.997	253.361	273.287	253.827	197.043	210.007	238.981	243.158	230.344	236.249	214.077
101	O95831	AIFM1	Apoptosis-inducing factor 1, mitochondrial OS=Homo sapiens OX=9606 GN=AIFM1 PE=1 SV=1					1	3	2	2	5	5	5	3	3	4	3	18.771	13.7437	21.4227	24.2572	2.97036	15.5576	215.909	197.897	225.341	220.604	274.75	214.226	107.171	112.219	104.033	107.942	124.005	111.723	125.742	117.373	130.81	133.896	146.875	143.52	292.072	298.329	314.234	311.534	346.027	317.388	332.173
102	Q9BRQ8	AIFM2	Apoptosis-inducing factor 2 OS=Homo sapiens OX=9606 GN=AIFM2 PE=1 SV=1					2	1	2	0	0	0	0	0	0	0	0	40.2355	44.6443	38.0253	48.4369	57.0652	43.4943	87.0557	79.6656	73.2624	81.3802	106.681	91.6293	80.9754	81.8358	65.8319	85.7169	72.7751	93.8043	0	0	0	0	0	0	0	0	0	0	0	0	0
103	Q12904	AIMP1	Aminoacyl tRNA synthase complex-interacting multifunctional protein 1 OS=Homo sapiens OX=9606 GN=AIMP1 PE=1 SV=2					3	2	2	3	3	3	3	1	2	1	2	140.696	152.131	141.156	153.133	127.102	126.444	100.175	115.94	108.469	129.724	52.4357	131.101	96.7793	78.6804	117.687	103.085	91.1908	122.327	97.0584	76.2865	79.0447	98.7185	106.439	112.097	134.306	124.95	146.863	153.408	184.118	182.521	158.565
104	Q13155	AIMP2	Aminoacyl tRNA synthase complex-interacting multifunctional protein 2 OS=Homo sapiens OX=9606 GN=AIMP2 PE=1 SV=2					3	4	4	4	3	4	4	3	3	2	3	269.727	286.862	286.081	322.976	82.9047	237.942	201.573	188.144	228.502	263.905	94.8381	244.092	126.891	118.884	132.993	181.308	147.693	150.666	138.475	135.618	174.089	194.752	193.316	167.073	195.29	186.295	233.241	254.907	238.343	210.14	285.545
105	O00170	AIP	AH receptor-interacting protein OS=Homo sapiens OX=9606 GN=AIP PE=1 SV=2					1	0	0	0	0	0	0	0	0	0	0	116.891	90.3834	98.8004	112.101	144.553	100.486	0	0	0	0	0	0	0	0	0	0	0	0	0	0	0	0	0	0	0	0	0	0	0	0	0
106	P00568	AK1	Adenylate kinase isoenzyme 1 OS=Homo sapiens OX=9606 GN=AK1 PE=1 SV=3					3	1	0	0	0	0	0	0	0	0	0	118.938	127.901	107.936	116.671	150.085	112.93	26.3919	27.5395	25.8619	28.5327	36.0247	26.717	0	0	0	0	0	0	0	0	0	0	0	0	0	0	0	0	0	0	0
107	P54819	AK2	Adenylate kinase 2, mitochondrial OS=Homo sapiens OX=9606 GN=AK2 PE=1 SV=2					2	1	1	0	0	0	0	0	0	0	0	135.481	249.64	256.54	209.118	22.9416	208.498	139.905	162.545	143.049	188.941	55.2441	184.638	54.9173	51.3558	48.2583	58.0393	76.6339	58.6247	0	0	0	0	0	0	0	0	0	0	0	0	0
108	Q9UIJ7	AK3	GTP:AMP phosphotransferase AK3, mitochondrial OS=Homo sapiens OX=9606 GN=AK3 PE=1 SV=4					2	0	0	0	0	0	0	0	0	0	0	138.112	179.523	161.165	165.919	54.4047	162.288	0	0	0	0	0	0	0	0	0	0	0	0	0	0	0	0	0	0	0	0	0	0	0	0	0
109	P27144	AK4	Adenylate kinase 4, mitochondrial OS=Homo sapiens OX=9606 GN=AK4 PE=1 SV=1					2	1	2	1	0	0	2	1	1	1	3	144.817	158.529	155.974	160.206	228.456	170.805	57.9695	60.6504	52.1393	63.5175	86.2334	49.7555	274.808	276.956	195.419	290.894	282.243	237.229	96.246	99.2223	115.877	122.516	133.111	113.958	0	0	0	0	0	0	0
110	Q9Y3D8	AK6	Adenylate kinase isoenzyme 6 OS=Homo sapiens OX=9606 GN=AK6 PE=1 SV=1					1	0	2	1	2	2	1	1	0	0	0	34.5746	30.3886	35.697	37.8368	72.1456	37.592	0	0	0	0	0	0	269.441	245.158	275.648	304.645	256.301	267.351	77.4287	81.0966	96.6582	98.8441	97.1375	79.311	281.561	259.109	336.792	294.609	302.096	245.361	229.589
111	Q92667	AKAP1	A-kinase anchor protein 1, mitochondrial OS=Homo sapiens OX=9606 GN=AKAP1 PE=1 SV=1					1	0	0	0	0	0	0	0	0	0	0	39.712	40.1532	42.6951	45.9036	11.0846	41.0672	0	0	0	0	0	0	0	0	0	0	0	0	0	0	0	0	0	0	0	0	0	0	0	0	0
112	Q9UKA4	AKAP11	A-kinase anchor protein 11 OS=Homo sapiens OX=9606 GN=AKAP11 PE=1 SV=1					0	0	3	0	3	2	1	0	1	0	0	0	0	0	0	0	0	0	0	0	0	0	0	279.309	232.894	261.996	327.937	267.073	248.655	0	0	0	0	0	0	309.876	283.622	328.228	345.531	316.528	298.766	229.777
113	Q02952	AKAP12	A-kinase anchor protein 12 OS=Homo sapiens OX=9606 GN=AKAP12 PE=1 SV=4					2	5	3	2	4	4	3	2	3	3	2	82.9883	85.523	90.0649	96.6452	132.48	77.0509	312.129	285.049	307.465	301.227	413.527	311.859	185.306	179.873	202.228	237.364	247.497	219.202	97.6928	89.7689	127.188	109.99	118.385	95.284	348.972	315.512	331.24	299.508	339.565	323.517	403.149
114	Q12802	AKAP13	A-kinase anchor protein 13 OS=Homo sapiens OX=9606 GN=AKAP13 PE=1 SV=2					0	0	1	0	0	0	0	0	0	0	0	0	0	0	0	0	0	0	0	0	0	0	0	53.84	45.9458	51.9533	56.4608	64.443	56.0933	0	0	0	0	0	0	0	0	0	0	0	0	0
115	Q02040	AKAP17A	A-kinase anchor protein 17A OS=Homo sapiens OX=9606 GN=AKAP17A PE=1 SV=2					0	0	0	0	0	0	1	0	0	0	0	0	0	0	0	0	0	0	0	0	0	0	0	0	0	0	0	0	0	0	0	0	0	0	0	0	0	0	0	0	0	0
116	O43823	AKAP8	A-kinase anchor protein 8 OS=Homo sapiens OX=9606 GN=AKAP8 PE=1 SV=1					0	0	2	2	3	1	2	4	3	2	3	0	0	0	0	0	0	0	0	0	0	0	0	69.1666	69.9115	65.7574	75.7436	77.0878	80.5035	56.6064	56.1956	53.5084	64.4601	77.9996	69.7992	166.851	178.846	182.831	175.162	197.401	194.759	62.4904
117	Q9ULX6	AKAP8L	A-kinase anchor protein 8-like OS=Homo sapiens OX=9606 GN=AKAP8L PE=1 SV=4					0	3	2	3	4	2	5	4	4	3	3	0	0	0	0	0	0	95.7735	79.0978	84.9202	101.468	76.914	82.7766	81.8217	71.3158	67.0211	76.8754	82.4293	75.7403	134.396	123.392	123.582	169.284	172.118	153.798	176.385	168.059	177.285	191.012	208.933	188.864	190.512
118	Q99996	AKAP9	A-kinase anchor protein 9 OS=Homo sapiens OX=9606 GN=AKAP9 PE=1 SV=4					0	0	3	0	0	0	0	0	0	0	0	0	0	0	0	0	0	0	0	0	0	0	0	89.373	84.9867	81.7585	107.974	90.8038	87.1002	0	0	0	0	0	0	0	0	0	0	0	0	0
119	P14550	AKR1A1	Alcohol dehydrogenase [NADP(+)] OS=Homo sapiens OX=9606 GN=AKR1A1 PE=1 SV=3					4	1	0	0	0	0	0	0	0	0	0	172.934	183.905	168.007	188.375	378.117	167.193	36.5023	35.7169	32.76	36.6037	16.7496	44.2673	0	0	0	0	0	0	0	0	0	0	0	0	0	0	0	0	0	0	0
120	P15121	AKR1B1	Aldose reductase OS=Homo sapiens OX=9606 GN=AKR1B1 PE=1 SV=3					2	1	0	0	0	0	0	0	0	0	0	311.665	335.319	354.027	385.821	492.258	361.118	105.408	111.086	103.057	111.294	152.741	123.933	0	0	0	0	0	0	0	0	0	0	0	0	0	0	0	0	0	0	0
121	O43488	AKR7A2	Aflatoxin B1 aldehyde reductase member 2 OS=Homo sapiens OX=9606 GN=AKR7A2 PE=1 SV=3					2	0	1	0	0	0	0	0	0	0	0	55.7324	54.6705	47.6639	56.0207	8.10482	55.9793	0	0	0	0	0	0	41.1609	42.6227	35.6232	42.706	37.1229	40.0468	0	0	0	0	0	0	0	0	0	0	0	0	0
122	Q96B36	AKT1S1	Proline-rich AKT1 substrate 1 OS=Homo sapiens OX=9606 GN=AKT1S1 PE=1 SV=1					1	0	0	0	0	0	0	0	0	0	0	34.499	31.4666	33.5946	34.8752	9.93324	34.202	0	0	0	0	0	0	0	0	0	0	0	0	0	0	0	0	0	0	0	0	0	0	0	0	0
123	P13196	ALAS1	5-aminolevulinate synthase, nonspecific, mitochondrial OS=Homo sapiens OX=9606 GN=ALAS1 PE=1 SV=2					0	0	2	0	0	0	0	0	0	0	0	0	0	0	0	0	0	0	0	0	0	0	0	171.238	171.789	145.949	173.171	150.795	159.38	0	0	0	0	0	0	0	0	0	0	0	0	0
124	Q13740	ALCAM	CD166 antigen OS=Homo sapiens OX=9606 GN=ALCAM PE=1 SV=2					2	0	0	0	0	0	0	0	0	0	0	298.407	301.924	268.215	335.523	95.871	278.959	0	0	0	0	0	0	0	0	0	0	0	0	0	0	0	0	0	0	0	0	0	0	0	0	0
125	Q8IZ83	ALDH16A1	Aldehyde dehydrogenase family 16 member A1 OS=Homo sapiens OX=9606 GN=ALDH16A1 PE=1 SV=2					0	2	3	4	2	0	2	2	0	2	2	0	0	0	0	0	0	46.0513	35.7572	36.9902	45.3426	4.13381	42.5056	149.688	120.693	124.049	161.427	148.144	155.543	216.697	173.606	253.968	265.22	278.274	219.082	237.264	197.19	304.521	297.569	296.322	236.02	0
126	P54886	ALDH18A1	Delta-1-pyrroline-5-carboxylate synthase OS=Homo sapiens OX=9606 GN=ALDH18A1 PE=1 SV=2					5	4	2	3	2	1	0	0	0	0	0	409.31	399.587	390.236	424.702	101.388	326.522	266.591	281.847	237.197	263.928	117.271	248.816	337.421	324.235	311.586	398.397	307.77	267.721	262.196	251.547	239.42	267.493	240.032	233.227	320.307	379.019	400.331	381.047	374.323	320.545	120.073
127	P47895	ALDH1A3	Aldehyde dehydrogenase family 1 member A3 OS=Homo sapiens OX=9606 GN=ALDH1A3 PE=1 SV=2					3	2	4	0	0	0	0	0	0	0	0	115.278	146.928	137.568	144.922	122.533	114.512	195.032	196.945	189.187	218.497	104.565	264.521	272.042	246.593	227.306	266.272	257.719	253.414	0	0	0	0	0	0	0	0	0	0	0	0	0
128	P30837	ALDH1B1	Aldehyde dehydrogenase X, mitochondrial OS=Homo sapiens OX=9606 GN=ALDH1B1 PE=1 SV=3					3	4	3	1	0	0	0	0	0	0	0	211.105	201.712	207.012	233.399	140.844	186.269	740.556	736.657	673.244	720.051	595.148	869.322	89.4891	73.3705	86.3508	82.3283	83.5051	80.2792	69.5215	62.4248	74.5325	80.5519	75.7901	62.8105	0	0	0	0	0	0	0
129	P05091	ALDH2	Aldehyde dehydrogenase, mitochondrial OS=Homo sapiens OX=9606 GN=ALDH2 PE=1 SV=2					1	0	0	0	0	0	0	0	0	0	0	39.9177	45.2948	36.3444	38.6731	7.50526	39.8415	0	0	0	0	0	0	0	0	0	0	0	0	0	0	0	0	0	0	0	0	0	0	0	0	0
130	P51648	ALDH3A2	Fatty aldehyde dehydrogenase OS=Homo sapiens OX=9606 GN=ALDH3A2 PE=1 SV=1					1	3	3	3	4	3	2	3	1	2	3	89.9478	91.9419	81.9736	99.5917	30.0873	78.0237	160.938	147.303	155.161	176.222	103.486	179.348	129.622	120.515	101.832	132.76	121.517	132.423	406.157	361.737	363.202	492.861	424.888	493.75	348.551	343.411	347.969	376.157	359.461	401.63	416.252
131	P49419	ALDH7A1	Alpha-aminoadipic semialdehyde dehydrogenase OS=Homo sapiens OX=9606 GN=ALDH7A1 PE=1 SV=5					1	3	0	0	0	0	0	0	0	0	0	27.7867	29.137	26.6027	25.4414	36.0723	27.6165	233.016	222.336	201.758	216.35	162.879	279.611	0	0	0	0	0	0	0	0	0	0	0	0	0	0	0	0	0	0	0
132	P49189	ALDH9A1	4-trimethylaminobutyraldehyde dehydrogenase OS=Homo sapiens OX=9606 GN=ALDH9A1 PE=1 SV=3					1	4	1	3	2	1	2	1	1	1	1	17.3994	21.1894	15.9643	23.9746	3.00124	19.3453	178.477	177.698	173.537	186.996	181.913	186.21	140.713	126.111	118.65	108.971	121.282	100.113	173.711	181.759	184.197	167.378	178.767	147.201	184.985	177.779	203.066	161.358	168.301	149.344	157.152
133	P04075	ALDOA	Fructose-bisphosphate aldolase A OS=Homo sapiens OX=9606 GN=ALDOA PE=1 SV=2					6	3	4	4	4	2	3	1	2	2	2	702.51	754.554	715.939	801.565	879.802	714.431	147.298	150.601	120.749	147.816	46.406	197.724	320.7	298.763	318.379	354.868	350.243	346.896	330.854	308.083	380.58	396.477	406.918	364.739	228.381	252.21	254.267	247.428	236.048	239.23	209.946
134	P09972	ALDOC	Fructose-bisphosphate aldolase C OS=Homo sapiens OX=9606 GN=ALDOC PE=1 SV=2					3	3	1	2	2	1	2	0	0	0	0	73.091	105.192	67.7258	85.449	63.3196	78.0265	133.571	134.927	115.47	121.052	116.104	160.733	29.3604	33.2906	26.4911	32.2899	33.2877	34.0042	61.4688	66.7682	62.5065	72.6136	78.4221	69.7081	66.9204	72.037	64.1043	69.7214	69.5246	70.2429	40.0029
135	Q9BT22	ALG1	Chitobiosyldiphosphodolichol beta-mannosyltransferase OS=Homo sapiens OX=9606 GN=ALG1 PE=1 SV=2					0	0	1	1	1	1	0	1	1	1	0	0	0	0	0	0	0	0	0	0	0	0	0	13.4866	12.3174	12.8102	15.7967	12.4312	13.3699	89.1385	106.553	91.1225	106.234	111.166	110.47	135.532	168.032	169.916	197.242	196.888	190.106	150.593
136	Q2TAA5	ALG11	GDP-Man:Man(3)GlcNAc(2)-PP-Dol alpha-1,2-mannosyltransferase OS=Homo sapiens OX=9606 GN=ALG11 PE=1 SV=2					0	0	1	0	0	0	0	0	0	0	0	0	0	0	0	0	0	0	0	0	0	0	0	77.9082	76.3744	59.2823	80.5872	72.8222	76.1519	0	0	0	0	0	0	0	0	0	0	0	0	0
137	Q9H553	ALG2	Alpha-1,3/1,6-mannosyltransferase ALG2 OS=Homo sapiens OX=9606 GN=ALG2 PE=1 SV=1					0	0	0	0	0	0	0	0	1	0	0	0	0	0	0	0	0	0	0	0	0	0	0	0	0	0	0	0	0	0	0	0	0	0	0	0	0	0	0	0	0	0
138	Q92685	ALG3	Dol-P-Man:Man(5)GlcNAc(2)-PP-Dol alpha-1,3-mannosyltransferase OS=Homo sapiens OX=9606 GN=ALG3 PE=1 SV=1					0	0	1	0	1	0	0	1	0	0	0	0	0	0	0	0	0	0	0	0	0	0	0	77.5282	63.498	64.137	74.0767	98.511	66.4334	0	0	0	0	0	0	97.868	131.132	143.498	65.6871	192.519	148.337	0
139	Q9Y673	ALG5	Dolichyl-phosphate beta-glucosyltransferase OS=Homo sapiens OX=9606 GN=ALG5 PE=1 SV=1					2	2	0	0	0	0	0	0	0	0	0	195.216	161.255	167.667	174.23	168.187	156.525	131.389	131.51	134.295	134.453	213.286	135.621	0	0	0	0	0	0	0	0	0	0	0	0	0	0	0	0	0	0	0
140	Q6P6C2	ALKBH5	RNA demethylase ALKBH5 OS=Homo sapiens OX=9606 GN=ALKBH5 PE=1 SV=2					1	0	0	0	0	0	0	0	0	0	0	47.1931	50.6753	44.0489	45.9508	28.6	43.1593	0	0	0	0	0	0	0	0	0	0	0	0	0	0	0	0	0	0	0	0	0	0	0	0	0
141	Q86V81	ALYREF	THO complex subunit 4 OS=Homo sapiens OX=9606 GN=ALYREF PE=1 SV=3					1	2	4	4	4	4	3	6	7	3	4	52.5115	64.2446	54.0329	47.288	60.1691	51.1513	55.6406	53.6084	58.5272	52.7852	31.9334	62.6582	479.639	362.808	427.168	532.566	452.651	522.395	312.723	224.57	285.319	236.389	191.789	205.346	884.088	676.687	791.41	631.304	608.296	587.534	905.821
142	Q9C0C7	AMBRA1	Activating molecule in BECN1-regulated autophagy protein 1 OS=Homo sapiens OX=9606 GN=AMBRA1 PE=1 SV=2					0	0	1	1	0	0	0	0	0	0	0	0	0	0	0	0	0	0	0	0	0	0	0	40.6512	38.0022	36.0926	47.0213	41.4164	44.184	16.4844	18.6746	18.2767	23.8217	23.1231	17.2968	0	0	0	0	0	0	0
143	Q9UKV5	AMFR	E3 ubiquitin-protein ligase AMFR OS=Homo sapiens OX=9606 GN=AMFR PE=1 SV=2			E3 ligase		0	0	1	0	0	0	1	0	2	0	0	0	0	0	0	0	0	0	0	0	0	0	0	21.0405	16.3676	16.7219	20.1673	19.0788	20.5372	0	0	0	0	0	0	0	0	0	0	0	0	0
144	Q01433	AMPD2	AMP deaminase 2 OS=Homo sapiens OX=9606 GN=AMPD2 PE=1 SV=2					0	1	0	0	0	0	0	0	0	0	0	0	0	0	0	0	0	82.0363	79.858	75.4467	99.612	120.974	111.588	0	0	0	0	0	0	0	0	0	0	0	0	0	0	0	0	0	0	0
145	Q9H1A4	ANAPC1	Anaphase-promoting complex subunit 1 OS=Homo sapiens OX=9606 GN=ANAPC1 PE=1 SV=1					0	2	4	2	2	2	0	2	0	0	0	0	0	0	0	0	0	295.203	278.601	287.56	334.326	249.465	281.073	235.411	228.299	191.204	281.229	219.732	260.741	92.9378	94.5773	94.6428	128.894	123.378	115.951	52.6635	44.4215	57.1475	64.3771	60.8827	60.1735	124.141
146	Q9BS18	ANAPC13	Anaphase-promoting complex subunit 13 OS=Homo sapiens OX=9606 GN=ANAPC13 PE=1 SV=1					0	0	1	0	0	0	0	0	0	0	0	0	0	0	0	0	0	0	0	0	0	0	0	43.9832	38.3193	35.4541	63.2035	46.2527	66.1939	0	0	0	0	0	0	0	0	0	0	0	0	0
147	Q9UJX5	ANAPC4	Anaphase-promoting complex subunit 4 OS=Homo sapiens OX=9606 GN=ANAPC4 PE=1 SV=2					0	1	3	1	2	1	0	1	1	0	0	0	0	0	0	0	0	23.1302	21.4758	23.8778	23.912	26.3014	20.0808	245.673	227.261	145.45	290.483	216.931	279.184	152.702	157.95	145.64	218.26	176.802	215.175	87.0612	80.5475	87.8353	95.373	92.3459	88.4077	20.2385
148	Q9UJX4	ANAPC5	Anaphase-promoting complex subunit 5 OS=Homo sapiens OX=9606 GN=ANAPC5 PE=1 SV=2					0	0	2	3	2	2	2	2	1	1	0	0	0	0	0	0	0	0	0	0	0	0	0	134.905	132.329	80.5363	132.504	133.266	124.459	80.7404	86.5763	90.0797	104.634	105.945	103.846	419.822	368.765	406.668	519.088	454	473.241	203.089
149	Q9UJX3	ANAPC7	Anaphase-promoting complex subunit 7 OS=Homo sapiens OX=9606 GN=ANAPC7 PE=1 SV=4					0	2	5	1	2	2	1	2	0	0	0	0	0	0	0	0	0	108.847	98.8602	104.245	105.688	21.2033	107.892	447.753	421.785	380.056	474.03	441.975	451.726	160.871	176.487	161.911	210.505	222.701	217.517	181.533	165.318	207.238	215.383	214.817	199.612	215.674
150	Q9P2R3	ANKFY1	Rabankyrin-5 OS=Homo sapiens OX=9606 GN=ANKFY1 PE=1 SV=2					0	1	3	2	4	2	2	3	2	3	2	0	0	0	0	0	0	70.0605	73.433	73.398	103.281	59.0671	77.8377	86.3718	77.8773	66.9694	89.1034	68.8759	79.3958	69.2392	85.5688	79.4219	98.9771	84.3792	81.935	303.122	315.826	337.729	348.138	364.478	370.058	117.421
151	Q8IWZ3	ANKHD1	Ankyrin repeat and KH domain-containing protein 1 OS=Homo sapiens OX=9606 GN=ANKHD1 PE=1 SV=1					0	1	0	0	0	1	0	1	1	0	1	0	0	0	0	0	0	34.3414	24.9222	29.0845	29.4646	8.39384	29.2559	0	0	0	0	0	0	0	0	0	0	0	0	0	0	0	0	0	0	67.4224
152	Q86XL3	ANKLE2	Ankyrin repeat and LEM domain-containing protein 2 OS=Homo sapiens OX=9606 GN=ANKLE2 PE=1 SV=4					0	2	2	2	1	1	1	1	0	1	0	0	0	0	0	0	0	81.9483	76.1119	86.092	85.9227	18.0072	81.155	188.612	176.63	146.6	216.001	185.247	191.304	448.109	393.959	424.805	531.66	528.084	516.814	79.0838	74.7501	84.1583	70.1507	86.7662	84.3544	22.2201
153	Q8IV38	ANKMY2	Ankyrin repeat and MYND domain-containing protein 2 OS=Homo sapiens OX=9606 GN=ANKMY2 PE=1 SV=1					0	1	2	1	0	0	0	0	0	0	0	0	0	0	0	0	0	18.881	22.4828	23.1671	24.6344	29.9818	18.7325	162.226	160.516	180.31	169.097	176.753	169.694	55.1539	50.7351	49.3648	56.5096	65.9462	63.352	0	0	0	0	0	0	0
154	Q6UB99	ANKRD11	Ankyrin repeat domain-containing protein 11 OS=Homo sapiens OX=9606 GN=ANKRD11 PE=1 SV=3					0	0	1	0	0	0	0	0	0	0	0	0	0	0	0	0	0	0	0	0	0	0	0	20.1312	17.6607	17.3326	22.6917	18.4203	17.021	0	0	0	0	0	0	0	0	0	0	0	0	0
155	O75179	ANKRD17	Ankyrin repeat domain-containing protein 17 OS=Homo sapiens OX=9606 GN=ANKRD17 PE=1 SV=3					2	2	2	4	4	2	3	5	2	1	2	193.254	178.8	183.099	228.417	53.2066	179.844	102.397	106.975	95.5062	101.488	95.4254	99.1973	125.49	102.986	152.79	142.744	146.443	135.704	263.834	264.149	255.549	270.523	263.985	318.377	247.598	232.751	270.919	235.584	248.022	233.172	167.984
156	O15084	ANKRD28	Serine/threonine-protein phosphatase 6 regulatory ankyrin repeat subunit A OS=Homo sapiens OX=9606 GN=ANKRD28 PE=1 SV=5					0	0	1	2	1	3	2	3	2	2	2	0	0	0	0	0	0	0	0	0	0	0	0	169.764	166.308	106.516	135.245	128.499	147.542	209.712	216.137	160.617	244.673	218.351	240.009	35.545	35.6625	36.128	41.6757	40.7663	40.1528	236.033
157	Q92625	ANKS1A	Ankyrin repeat and SAM domain-containing protein 1A OS=Homo sapiens OX=9606 GN=ANKS1A PE=1 SV=4					0	1	0	0	0	0	0	0	0	0	0	0	0	0	0	0	0	64.9588	55.7777	54.8492	63.962	87.0089	55.8415	0	0	0	0	0	0	0	0	0	0	0	0	0	0	0	0	0	0	0
158	Q9NQW6	ANLN	Anillin OS=Homo sapiens OX=9606 GN=ANLN PE=1 SV=2					0	4	3	4	2	3	4	2	2	3	2	0	0	0	0	0	0	311.445	309.644	314.552	330.428	416.872	291.753	185.705	164.97	182.982	192.308	194.678	185.337	191.835	167.945	184.038	196.121	186.571	184.202	155.514	152.895	167.902	152.917	168.537	148.712	151.817
159	Q5XXA6	ANO1	Anoctamin-1 OS=Homo sapiens OX=9606 GN=ANO1 PE=1 SV=1					0	1	0	0	0	0	0	0	0	0	0	0	0	0	0	0	0	116.448	114.381	123.887	106.44	137.897	111.294	0	0	0	0	0	0	0	0	0	0	0	0	0	0	0	0	0	0	0
160	Q4KMQ2	ANO6	Anoctamin-6 OS=Homo sapiens OX=9606 GN=ANO6 PE=1 SV=2					1	0	0	0	0	0	0	0	0	0	0	15.4502	16.601	14.1965	13.9866	14.5788	14.3569	0	0	0	0	0	0	0	0	0	0	0	0	0	0	0	0	0	0	0	0	0	0	0	0	0
161	P39687	ANP32A	Acidic leucine-rich nuclear phosphoprotein 32 family member A OS=Homo sapiens OX=9606 GN=ANP32A PE=1 SV=1					1	3	2	1	0	0	0	0	0	0	0	23.1728	21.9983	18.5244	24.2452	25.8365	16.8419	223.127	215.154	214.454	204.815	264.192	221.64	91.4224	80.6887	89.0234	90.773	106.213	87.6841	63.1864	55.6114	61.2575	66.8326	74.4335	63.037	0	0	0	0	0	0	0
162	Q92688	ANP32B	Acidic leucine-rich nuclear phosphoprotein 32 family member B OS=Homo sapiens OX=9606 GN=ANP32B PE=1 SV=1					4	2	1	1	0	0	0	0	0	0	0	304.239	299.978	299.163	327.408	346.774	274.303	152.954	147.064	165.581	165.604	178.239	187.734	17.9837	19.2906	17.9032	18.1462	15.5109	20.059	34.6202	33.1194	36.3334	35.4508	34.9288	38.6699	0	0	0	0	0	0	0
163	Q9BTT0	ANP32E	Acidic leucine-rich nuclear phosphoprotein 32 family member E OS=Homo sapiens OX=9606 GN=ANP32E PE=1 SV=1					1	3	3	2	3	2	2	1	2	3	4	153.198	144.298	141.445	141.664	209.293	133.714	491.483	497.288	447.043	517.847	649.04	541.313	320.377	275.448	270.936	331.124	307.054	337.303	229.928	202.512	213.133	249.369	264.028	262.864	224.681	195.682	190.204	216.94	220.505	237.006	59.015
164	P04083	ANXA1	Annexin A1 OS=Homo sapiens OX=9606 GN=ANXA1 PE=1 SV=2					1	6	4	2	2	0	0	0	0	0	1	21.6586	19.5348	21.694	26.463	3.15772	16.2697	296.224	287.038	270.027	277.504	114.534	333.866	165.229	166.719	173.488	188.016	186.208	190.996	55.2509	46.9662	62.6305	67.2221	57.3225	57.5975	35.927	55.4729	61.1651	53.0366	60.3698	66.1478	0
165	P50995	ANXA11	Annexin A11 OS=Homo sapiens OX=9606 GN=ANXA11 PE=1 SV=1					3	4	2	0	1	0	0	1	1	0	2	84.4078	83.4838	80.2253	83.0229	175.171	73.5097	276.463	293.312	255.209	262.654	162.404	292.816	61.9685	69.8226	77.4821	80.714	72.5222	67.4424	0	0	0	0	0	0	56.7547	60.8314	69.7761	61.3589	69.4799	68.4484	0
166	P07355	ANXA2	Annexin A2 OS=Homo sapiens OX=9606 GN=ANXA2 PE=1 SV=2					4	4	4	4	3	0	1	0	0	0	4	272.731	291.804	294.813	305.217	49.952	273.026	500.056	661.866	566.864	657.607	96.504	813.049	265.065	301.306	285.707	307.691	343.679	312.044	190.946	209.462	204.911	241.57	254.51	254.567	275.288	360.272	384.006	373.372	356.549	344.803	0
167	P12429	ANXA3	Annexin A3 OS=Homo sapiens OX=9606 GN=ANXA3 PE=1 SV=3					2	4	2	0	0	0	0	0	0	0	0	161.423	159.585	153.834	173.092	83.0037	172.421	552.237	547.536	549.343	559.112	798.853	617.822	109.739	91.5481	106.931	98.5958	104.695	106.214	0	0	0	0	0	0	0	0	0	0	0	0	0
168	P09525	ANXA4	Annexin A4 OS=Homo sapiens OX=9606 GN=ANXA4 PE=1 SV=4					1	0	0	0	0	0	0	0	0	0	0	38.7585	38.934	38.4098	36.03	57.5852	42.4871	0	0	0	0	0	0	0	0	0	0	0	0	0	0	0	0	0	0	0	0	0	0	0	0	0
169	P08758	ANXA5	Annexin A5 OS=Homo sapiens OX=9606 GN=ANXA5 PE=1 SV=2					6	4	2	2	0	0	0	0	0	0	0	399.678	386.457	356.336	375.238	266.956	369.646	303.745	329.503	289.411	311.533	185.218	371.545	135.388	116.302	110.086	135.162	119.275	123.277	50.8647	43.7402	57.6802	52.3798	66.8834	62.875	0	0	0	0	0	0	0
170	P08133	ANXA6	Annexin A6 OS=Homo sapiens OX=9606 GN=ANXA6 PE=1 SV=3					2	2	1	2	1	0	0	0	0	0	0	382.551	465.391	534.34	453.982	25.4543	479.169	76.7432	74.0992	71.5556	101.543	33.0677	101.777	69.1817	62.1298	68.0545	108.286	82.1846	132.132	89.9462	78.5049	76.496	120.851	88.7596	180.781	10.3758	6.12495	8.61041	13.9992	10.6806	40.8277	0
171	P20073	ANXA7	Annexin A7 OS=Homo sapiens OX=9606 GN=ANXA7 PE=1 SV=3					0	0	1	0	0	0	0	0	0	0	0	0	0	0	0	0	0	0	0	0	0	0	0	18.5862	18.6791	16.2994	18.2828	15.7052	21.1567	0	0	0	0	0	0	0	0	0	0	0	0	0
172	Q06278	AOX1	Aldehyde oxidase OS=Homo sapiens OX=9606 GN=AOX1 PE=1 SV=2					1	0	0	0	0	0	0	0	0	0	0	17.0448	24.3469	18.2713	21.4597	21.7505	16.6101	0	0	0	0	0	0	0	0	0	0	0	0	0	0	0	0	0	0	0	0	0	0	0	0	0
173	Q10567	AP1B1	AP-1 complex subunit beta-1 OS=Homo sapiens OX=9606 GN=AP1B1 PE=1 SV=2					2	2	3	4	4	4	3	5	4	4	3	137.519	148.133	130.991	143.098	83.1138	122.269	173.678	163.289	162.7	193.416	204.302	173.917	298.866	280.915	195.879	333.955	302.476	283.953	346.059	334.008	312.227	465.001	406.723	399.399	463.295	441.133	486.899	630.031	545.988	564.604	446.401
174	O43747	AP1G1	AP-1 complex subunit gamma-1 OS=Homo sapiens OX=9606 GN=AP1G1 PE=1 SV=5					3	3	4	2	4	3	3	3	3	0	1	178.959	182.348	169.163	217.572	259.063	165.17	108.826	97.133	95.1435	120.037	77.2456	109.828	202.955	205.635	157.512	221.777	224.632	182.485	92.846	88.6793	99.1759	114.914	113.528	107.113	181.782	205.773	228.403	266.183	241.155	215.78	85.1736
175	O75843	AP1G2	AP-1 complex subunit gamma-like 2 OS=Homo sapiens OX=9606 GN=AP1G2 PE=1 SV=1					0	0	1	0	0	0	0	0	0	1	0	0	0	0	0	0	0	0	0	0	0	0	0	20.5236	16.8782	15.4076	22.8805	15.5647	17.4477	0	0	0	0	0	0	0	0	0	0	0	0	0
176	Q9BXS5	AP1M1	AP-1 complex subunit mu-1 OS=Homo sapiens OX=9606 GN=AP1M1 PE=1 SV=3					0	2	2	3	3	3	3	2	3	2	3	0	0	0	0	0	0	81.2317	74.3179	76.2878	86.8191	90.6242	77.1939	83.817	83.6673	83.5918	116.961	93.9017	94.2012	138.241	142.305	145.767	174.089	171.639	137.328	190.161	173.565	213.665	229.433	205.838	205.341	178.161
177	Q9Y6Q5	AP1M2	AP-1 complex subunit mu-2 OS=Homo sapiens OX=9606 GN=AP1M2 PE=1 SV=4					0	4	2	5	3	4	5	5	4	4	3	0	0	0	0	0	0	203.119	188.323	176.591	215.25	91.903	198.858	95.4725	87.3597	84.3655	104.99	86.2151	91.6144	378.428	366.583	347.612	407.153	409.101	390.545	249.586	250.065	264.984	276.373	283.24	261.812	351.1
178	Q96PC3	AP1S3	AP-1 complex subunit sigma-3 OS=Homo sapiens OX=9606 GN=AP1S3 PE=1 SV=1					0	0	1	0	0	1	0	2	0	0	0	0	0	0	0	0	0	0	0	0	0	0	0	27.7428	27.6015	16.8487	31.9475	29.1697	29.2238	0	0	0	0	0	0	0	0	0	0	0	0	29.2343
179	O95782	AP2A1	AP-2 complex subunit alpha-1 OS=Homo sapiens OX=9606 GN=AP2A1 PE=1 SV=3					1	4	2	3	2	4	4	4	5	3	1	19.4303	19.322	15.6379	19.7823	11.0893	11.5239	177.509	146.141	156.098	197.326	162.113	162.011	215.781	210.61	148.21	225.936	197.307	197.15	229.337	243.872	216.199	281.291	262.427	256.685	145.407	138.643	146.51	167.637	165.343	171.728	467.525
180	O94973	AP2A2	AP-2 complex subunit alpha-2 OS=Homo sapiens OX=9606 GN=AP2A2 PE=1 SV=2					0	2	2	3	3	3	2	2	2	2	1	0	0	0	0	0	0	64.6166	52.7024	55.3075	68.6288	53.3891	63.612	98.9842	83.2928	76.9743	102.473	97.3853	97.6056	67.8606	69.3379	69.4619	96.4254	94.0966	97.275	257.935	228.807	270.692	271.604	262.8	267.966	164.347
181	P63010	AP2B1	AP-2 complex subunit beta OS=Homo sapiens OX=9606 GN=AP2B1 PE=1 SV=1					0	1	1	2	2	1	2	2	2	2	2	0	0	0	0	0	0	54.4661	47.3328	46.4882	55.5034	70.7953	47.3296	76.6592	62.6032	66.4058	90.0818	69.411	86.5778	124.77	100.613	103.266	165.131	139.06	127.136	133.612	111.558	120.866	143.214	125.996	123.608	49.289
182	Q96CW1	AP2M1	AP-2 complex subunit mu OS=Homo sapiens OX=9606 GN=AP2M1 PE=1 SV=2					0	3	4	4	5	4	5	6	6	5	5	0	0	0	0	0	0	211.935	196.475	198.447	244.469	115.57	197.486	514.845	481.227	446.214	579.474	487.726	532.905	469.192	475.563	472.288	653.538	576.754	571.976	470.364	414.457	479.581	580.728	518.258	492.181	356.573
183	P53680	AP2S1	AP-2 complex subunit sigma OS=Homo sapiens OX=9606 GN=AP2S1 PE=1 SV=2					0	0	4	1	1	2	1	3	4	3	1	0	0	0	0	0	0	0	0	0	0	0	0	268.245	278.896	241.173	343.783	271.507	314.194	59.089	66.7282	60.2354	76.6675	83.6446	71.0195	72.6637	82.9576	82.1245	98.4713	97.7408	89.3355	76.0366
184	O00203	AP3B1	AP-3 complex subunit beta-1 OS=Homo sapiens OX=9606 GN=AP3B1 PE=1 SV=3					1	3	1	1	0	2	0	1	1	1	2	39.7698	31.1318	32.4153	40.2961	40.087	38.3783	199.748	201.269	169.048	205.079	133.183	227.533	18.2382	18.8958	17.944	16.2603	19.6883	19.2907	95.3613	105.421	112.179	140.387	135.546	116.95	0	0	0	0	0	0	241.053
185	Q13367	AP3B2	AP-3 complex subunit beta-2 OS=Homo sapiens OX=9606 GN=AP3B2 PE=1 SV=2					0	0	0	0	0	0	0	1	0	0	0	0	0	0	0	0	0	0	0	0	0	0	0	0	0	0	0	0	0	0	0	0	0	0	0	0	0	0	0	0	0	0
186	O14617	AP3D1	AP-3 complex subunit delta-1 OS=Homo sapiens OX=9606 GN=AP3D1 PE=1 SV=1					2	2	2	4	2	4	3	3	5	4	5	139.408	138.481	120.866	168.89	196.946	118.368	70.2693	69.7016	73.0473	81.9451	73.6131	63.236	282.438	265.212	220.587	309.737	265.889	251.135	206.467	209.611	200.602	255.554	226.368	209.17	126.676	121.432	117.48	132.759	128.07	121.888	582.835
187	Q9Y2T2	AP3M1	AP-3 complex subunit mu-1 OS=Homo sapiens OX=9606 GN=AP3M1 PE=1 SV=1					3	3	1	0	0	0	0	0	0	1	4	209.864	182.762	164.346	229.038	121.017	190.321	338.588	325.01	309.929	348.201	343.072	356.6	96.1822	88.7027	77.0583	85.8652	90.3417	82.7706	0	0	0	0	0	0	0	0	0	0	0	0	0
188	Q92572	AP3S1	AP-3 complex subunit sigma-1 OS=Homo sapiens OX=9606 GN=AP3S1 PE=1 SV=1					0	4	4	3	4	4	3	2	4	3	1	0	0	0	0	0	0	397.9	390.906	367.505	430.544	166.963	402.156	444.865	454.366	393.227	448.689	420.367	471.205	360.844	408.616	345.713	447.528	448.545	456.695	461.683	396.201	437.172	346.244	414.498	394.283	552.025
189	Q2VPB7	AP5B1	AP-5 complex subunit beta-1 OS=Homo sapiens OX=9606 GN=AP5B1 PE=1 SV=4					0	0	0	0	0	0	0	1	0	0	0	0	0	0	0	0	0	0	0	0	0	0	0	0	0	0	0	0	0	0	0	0	0	0	0	0	0	0	0	0	0	0
190	P25054	APC	Adenomatous polyposis coli protein OS=Homo sapiens OX=9606 GN=APC PE=1 SV=2					0	0	0	0	0	0	0	1	0	0	0	0	0	0	0	0	0	0	0	0	0	0	0	0	0	0	0	0	0	0	0	0	0	0	0	0	0	0	0	0	0	0
191	O95996	APC2	Adenomatous polyposis coli protein 2 OS=Homo sapiens OX=9606 GN=APC2 PE=1 SV=1					0	0	1	1	0	1	0	0	0	0	0	0	0	0	0	0	0	0	0	0	0	0	0	120.893	109.734	98.474	116.928	108.371	105.266	105.491	101.631	90.3083	110.552	107.996	109.979	0	0	0	0	0	0	181.833
192	P13798	APEH	Acylamino-acid-releasing enzyme OS=Homo sapiens OX=9606 GN=APEH PE=1 SV=4					2	3	3	2	1	1	0	2	0	0	0	48.4436	52.3659	53.8114	56.5586	9.85859	38.8523	478.018	444.747	418.388	451.088	472.197	552.162	220.6	188.949	181.529	211.714	206.262	214.015	61.3581	50.1051	54.7765	63.8116	61.903	54.9487	34.5547	35.0859	37.3453	34.6147	38.5653	33.4314	24.7973
193	P27695	APEX1	DNA-(apurinic or apyrimidinic site) lyase OS=Homo sapiens OX=9606 GN=APEX1 PE=1 SV=2					4	2	4	1	0	0	0	0	0	0	0	88.0132	89.0844	85.5982	90.316	87.1638	72.1353	152.127	139.257	147.259	166.782	199.511	173.489	264.773	257.824	244.157	283.979	282.573	287.001	23.6625	19.8809	26.0538	30.3173	28.314	19.072	0	0	0	0	0	0	0
194	Q9BZZ5	API5	Apoptosis inhibitor 5 OS=Homo sapiens OX=9606 GN=API5 PE=1 SV=3					3	3	1	1	1	1	0	0	0	0	0	185.634	206.982	174.758	200.613	217.301	187.614	214.733	206.521	202.792	203.309	259.114	205.322	98.9852	97.6993	96.861	103.374	111.996	96.2924	82.4077	89.3528	86.8539	101.224	105.391	86.7769	97.4998	106.311	110.523	104.337	100.096	90.2323	101.586
195	Q96GX9	APIP	Methylthioribulose-1-phosphate dehydratase OS=Homo sapiens OX=9606 GN=APIP PE=1 SV=1					4	0	0	0	0	0	0	0	0	0	0	243.18	222.675	221.062	251.779	175.791	235.716	0	0	0	0	0	0	0	0	0	0	0	0	0	0	0	0	0	0	0	0	0	0	0	0	0
196	Q9HDC9	APMAP	Adipocyte plasma membrane-associated protein OS=Homo sapiens OX=9606 GN=APMAP PE=1 SV=2					3	4	1	0	0	0	0	0	0	0	0	49.7495	45.5746	38.2056	53.1975	50.7258	47.5688	240.794	219.488	215.842	249.767	275.775	254.706	49.1371	38.1659	38.7704	49.3252	45.4495	58.0124	0	0	0	0	0	0	0	0	0	0	0	0	0
197	P02647	APOA1	Apolipoprotein A-I OS=Homo sapiens OX=9606 GN=APOA1 PE=1 SV=1					2	0	0	0	0	0	0	0	0	0	0	73.6193	107.985	97.879	117.2	52.7684	95.1312	0	0	0	0	0	0	0	0	0	0	0	0	0	0	0	0	0	0	0	0	0	0	0	0	0
198	P04114	APOB	Apolipoprotein B-100 OS=Homo sapiens OX=9606 GN=APOB PE=1 SV=2					0	2	1	0	0	0	0	0	0	0	0	0	0	0	0	0	0	334.374	278.651	248.365	328.325	275.743	293.621	20.6156	22.4007	23.09	28.0801	20.2569	27.1831	0	0	0	0	0	0	0	0	0	0	0	0	0
199	Q9UH17	APOBEC3B	DNA dC->dU-editing enzyme APOBEC-3B OS=Homo sapiens OX=9606 GN=APOBEC3B PE=1 SV=1					0	0	0	0	0	1	0	1	0	0	0	0	0	0	0	0	0	0	0	0	0	0	0	0	0	0	0	0	0	0	0	0	0	0	0	0	0	0	0	0	0	143.268
200	Q9NRW3	APOBEC3C	DNA dC->dU-editing enzyme APOBEC-3C OS=Homo sapiens OX=9606 GN=APOBEC3C PE=1 SV=2					0	0	0	1	0	0	0	0	0	0	0	0	0	0	0	0	0	0	0	0	0	0	0	0	0	0	0	0	0	221.834	215.373	228.291	249.022	215.134	221.54	0	0	0	0	0	0	0
201	P05067	APP	Amyloid-beta precursor protein OS=Homo sapiens OX=9606 GN=APP PE=1 SV=3					0	0	0	0	0	0	0	1	0	0	0	0	0	0	0	0	0	0	0	0	0	0	0	0	0	0	0	0	0	0	0	0	0	0	0	0	0	0	0	0	0	0
202	P07741	APRT	Adenine phosphoribosyltransferase OS=Homo sapiens OX=9606 GN=APRT PE=1 SV=2					4	2	2	0	0	0	0	0	0	0	0	350.866	354.033	335.922	364.023	23.8144	405.92	197.47	214.769	205.127	221.292	394.115	241.988	78.6341	79.6054	79.1859	82.9182	83.7282	83.2881	0	0	0	0	0	0	0	0	0	0	0	0	0
203	Q7Z2E3	APTX	Aprataxin OS=Homo sapiens OX=9606 GN=APTX PE=1 SV=2					0	0	0	0	0	0	0	0	0	1	0	0	0	0	0	0	0	0	0	0	0	0	0	0	0	0	0	0	0	0	0	0	0	0	0	0	0	0	0	0	0	0
204	O60306	AQR	RNA helicase aquarius OS=Homo sapiens OX=9606 GN=AQR PE=1 SV=4					0	4	0	3	2	3	0	0	0	0	0	0	0	0	0	0	0	172.387	163.916	173.146	176.582	90.7009	174.582	0	0	0	0	0	0	427.343	425.966	411.936	548.954	511.131	493.626	509.242	542.074	470.469	599.486	521.141	565.939	740.419
205	Q8WWN8	ARAP3	Arf-GAP with Rho-GAP domain, ANK repeat and PH domain-containing protein 3 OS=Homo sapiens OX=9606 GN=ARAP3 PE=1 SV=1					0	0	0	0	0	0	0	1	0	0	0	0	0	0	0	0	0	0	0	0	0	0	0	0	0	0	0	0	0	0	0	0	0	0	0	0	0	0	0	0	0	0
206	P48444	ARCN1	Coatomer subunit delta OS=Homo sapiens OX=9606 GN=ARCN1 PE=1 SV=1					0	4	3	2	3	3	4	3	2	4	3	0	0	0	0	0	0	315.42	283.911	292.612	346.738	181.656	330.83	155.085	127.502	154.087	174.269	152.652	153.855	81.1484	75.2692	86.2975	96.7061	92.3374	88.426	256.576	226.283	273.396	265.142	252.539	243.281	329.296
207	P84077	ARF1	ADP-ribosylation factor 1 OS=Homo sapiens OX=9606 GN=ARF1 PE=1 SV=2					1	1	5	2	1	0	0	0	0	0	0	15.6737	21.2444	20.8456	18.6684	25.8647	21.708	13.7221	14.9122	17.6648	20.6223	22.4557	22.424	881.079	1001.76	792.199	1002.45	1017.11	982.585	157.616	216.297	199.105	217.723	265.475	263.55	188.373	277.135	292.752	297.621	286.426	292.962	0
208	P18085	ARF4	ADP-ribosylation factor 4 OS=Homo sapiens OX=9606 GN=ARF4 PE=1 SV=3					3	0	0	0	0	0	0	0	0	0	0	209.005	225.589	186.387	218.357	40.1228	208.994	0	0	0	0	0	0	0	0	0	0	0	0	0	0	0	0	0	0	0	0	0	0	0	0	0
209	P84085	ARF5	ADP-ribosylation factor 5 OS=Homo sapiens OX=9606 GN=ARF5 PE=1 SV=2					1	1	0	0	0	0	0	0	0	0	0	49.0561	50.6712	54.429	53.6997	270.668	45.0835	58.9237	60.3163	61.5379	70.0789	12.7499	80.3184	0	0	0	0	0	0	0	0	0	0	0	0	0	0	0	0	0	0	0
210	P62330	ARF6	ADP-ribosylation factor 6 OS=Homo sapiens OX=9606 GN=ARF6 PE=1 SV=2					4	3	0	0	0	0	0	0	0	0	0	579.428	608.644	541.317	592.897	272.421	607.281	260.998	256.925	265.783	260.23	346.352	279.708	0	0	0	0	0	0	0	0	0	0	0	0	0	0	0	0	0	0	0
211	Q8N6T3	ARFGAP1	ADP-ribosylation factor GTPase-activating protein 1 OS=Homo sapiens OX=9606 GN=ARFGAP1 PE=1 SV=2					2	0	1	0	0	0	0	0	0	0	0	95.4724	91.5736	97.6306	101.233	93.8388	91.9594	0	0	0	0	0	0	24.2704	17.0402	18.803	17.9476	17.9197	17.9121	0	0	0	0	0	0	0	0	0	0	0	0	0
212	Q8N6H7	ARFGAP2	ADP-ribosylation factor GTPase-activating protein 2 OS=Homo sapiens OX=9606 GN=ARFGAP2 PE=1 SV=1					2	0	0	0	0	0	0	0	0	0	0	106.503	106.271	117.702	121.172	35.3641	107.616	0	0	0	0	0	0	0	0	0	0	0	0	0	0	0	0	0	0	0	0	0	0	0	0	0
213	Q9Y6D6	ARFGEF1	Brefeldin A-inhibited guanine nucleotide-exchange protein 1 OS=Homo sapiens OX=9606 GN=ARFGEF1 PE=1 SV=2					0	3	1	2	0	2	0	1	0	0	0	0	0	0	0	0	0	294.937	266.896	287.532	305.34	310.776	277.569	68.8349	55.2799	66.8207	70.1895	67.1789	72.5547	262.191	249.268	275.01	336.624	317.121	313.152	0	0	0	0	0	0	373.746
214	Q9Y6D5	ARFGEF2	Brefeldin A-inhibited guanine nucleotide-exchange protein 2 OS=Homo sapiens OX=9606 GN=ARFGEF2 PE=1 SV=3					0	3	3	2	1	0	0	0	0	0	0	0	0	0	0	0	0	272.942	263.838	254.053	275.46	278.281	260.401	504.674	444.637	427.699	512.96	507.753	495.412	219.405	192.661	217.166	255.112	266.093	248.509	50.3276	47.209	49.6109	46.2256	57.8419	52.1609	0
215	P53367	ARFIP1	Arfaptin-1 OS=Homo sapiens OX=9606 GN=ARFIP1 PE=1 SV=2					2	0	0	0	0	0	0	0	0	0	0	64.7238	69.2505	53.8135	62.3827	57.4344	60.5557	0	0	0	0	0	0	0	0	0	0	0	0	0	0	0	0	0	0	0	0	0	0	0	0	0
216	P53365	ARFIP2	Arfaptin-2 OS=Homo sapiens OX=9606 GN=ARFIP2 PE=1 SV=1					2	0	0	0	0	0	0	0	0	0	0	40.6117	45.2004	38.5929	42.402	10.4722	44.4514	0	0	0	0	0	0	0	0	0	0	0	0	0	0	0	0	0	0	0	0	0	0	0	0	0
217	Q07960	ARHGAP1	Rho GTPase-activating protein 1 OS=Homo sapiens OX=9606 GN=ARHGAP1 PE=1 SV=1					2	0	0	0	0	0	0	0	0	0	0	84.7741	90.5629	83.9668	100.048	45.9147	95.7172	0	0	0	0	0	0	0	0	0	0	0	0	0	0	0	0	0	0	0	0	0	0	0	0	0
218	Q8IWW6	ARHGAP12	Rho GTPase-activating protein 12 OS=Homo sapiens OX=9606 GN=ARHGAP12 PE=1 SV=1					3	0	0	0	0	0	0	0	0	0	0	139.129	115.203	118.481	133.896	33.8684	128.725	0	0	0	0	0	0	0	0	0	0	0	0	0	0	0	0	0	0	0	0	0	0	0	0	0
219	Q68EM7	ARHGAP17	Rho GTPase-activating protein 17 OS=Homo sapiens OX=9606 GN=ARHGAP17 PE=1 SV=1					2	0	0	1	0	0	0	0	0	0	0	134.322	133.695	132.032	137.942	182.403	132.264	0	0	0	0	0	0	0	0	0	0	0	0	44.9482	40.7972	47.8699	53.9777	46.7984	42.4751	0	0	0	0	0	0	0
220	Q8N392	ARHGAP18	Rho GTPase-activating protein 18 OS=Homo sapiens OX=9606 GN=ARHGAP18 PE=1 SV=3					1	0	0	0	0	0	0	0	0	0	0	42.8945	39.4357	37.5212	40.3648	0	39.9318	0	0	0	0	0	0	0	0	0	0	0	0	0	0	0	0	0	0	0	0	0	0	0	0	0
221	Q5T5U3	ARHGAP21	Rho GTPase-activating protein 21 OS=Homo sapiens OX=9606 GN=ARHGAP21 PE=1 SV=1					0	0	0	0	1	1	1	1	0	1	1	0	0	0	0	0	0	0	0	0	0	0	0	0	0	0	0	0	0	0	0	0	0	0	0	41.3067	41.5981	43.5966	45.4264	50.0896	44.9257	50.9409
222	Q9NRY4	ARHGAP35	Rho GTPase-activating protein 35 OS=Homo sapiens OX=9606 GN=ARHGAP35 PE=1 SV=3					1	0	1	1	1	0	2	1	1	0	0	144.479	130.884	130.271	181.405	214.688	121.626	0	0	0	0	0	0	107.963	97.7375	83.8932	100.625	96.5574	97.6773	296.135	314.549	303.819	402.482	375.855	346.3	279.652	267.979	294.538	313.752	288.293	289.015	0
223	P98171	ARHGAP4	Rho GTPase-activating protein 4 OS=Homo sapiens OX=9606 GN=ARHGAP4 PE=1 SV=2					0	1	2	1	2	1	1	3	2	4	3	0	0	0	0	0	0	28.4232	25.2744	26.8293	27.8069	30.305	34.7261	53.483	51.8261	42.9433	62.9282	53.7543	58.1457	47.4776	46.5605	42.2479	60.6285	50.5042	47.7307	134.006	122.896	130.801	135.209	123.573	124.439	93.5633
224	P85298	ARHGAP8	Rho GTPase-activating protein 8 OS=Homo sapiens OX=9606 GN=ARHGAP8 PE=1 SV=1					0	0	0	0	1	0	1	0	1	0	0	0	0	0	0	0	0	0	0	0	0	0	0	0	0	0	0	0	0	0	0	0	0	0	0	169.693	141.569	164.652	182.194	186.665	144.023	0
225	P52565	ARHGDIA	Rho GDP-dissociation inhibitor 1 OS=Homo sapiens OX=9606 GN=ARHGDIA PE=1 SV=3					3	3	2	0	0	0	0	0	0	0	0	221.747	225.522	205.698	232.305	8.87982	232.803	212.593	211.634	205.533	220.249	47.1112	252.015	73.9567	68.7062	62.9701	72.3107	81.907	71.3864	0	0	0	0	0	0	0	0	0	0	0	0	0
226	Q92888	ARHGEF1	Rho guanine nucleotide exchange factor 1 OS=Homo sapiens OX=9606 GN=ARHGEF1 PE=1 SV=2					1	1	1	3	1	1	0	0	3	0	1	106.499	114.928	108.111	127.575	160.622	102.468	62.8482	57.8354	58.1023	69.9032	58.0839	69.3041	42.4619	37.3633	33.8917	34.764	34.7285	44.0064	140.459	134.872	154.604	171.842	165.696	153.715	225.576	223.164	251.994	230.735	242.926	222.338	151.79
227	O15013	ARHGEF10	Rho guanine nucleotide exchange factor 10 OS=Homo sapiens OX=9606 GN=ARHGEF10 PE=1 SV=4					3	1	0	0	0	0	0	0	0	0	0	409.552	386.369	347.282	444.708	548.419	371.879	65.29	70.0249	61.0339	66.9362	87.9647	63.0412	0	0	0	0	0	0	0	0	0	0	0	0	0	0	0	0	0	0	0
228	Q5VV41	ARHGEF16	Rho guanine nucleotide exchange factor 16 OS=Homo sapiens OX=9606 GN=ARHGEF16 PE=1 SV=1					1	0	0	0	0	0	0	0	0	0	0	116.46	114.23	112.406	122.627	154.858	115.741	0	0	0	0	0	0	0	0	0	0	0	0	0	0	0	0	0	0	0	0	0	0	0	0	0
229	Q92974	ARHGEF2	Rho guanine nucleotide exchange factor 2 OS=Homo sapiens OX=9606 GN=ARHGEF2 PE=1 SV=4					1	3	2	2	3	2	1	2	0	0	0	58.0649	57.8826	51.3981	72.3449	12.5468	59.032	254.7	250.121	260.516	274.706	275.138	281.416	222.256	222.979	218.205	235.392	222.104	220.018	228.764	170.052	190.412	222.718	185.52	170.163	438.879	397.987	466.452	548.481	428.101	489.394	209.928
230	Q8TER5	ARHGEF40	Rho guanine nucleotide exchange factor 40 OS=Homo sapiens OX=9606 GN=ARHGEF40 PE=1 SV=3					1	0	0	0	0	0	0	0	0	0	0	115.343	97.6684	77.122	122.345	86.0444	103.248	0	0	0	0	0	0	0	0	0	0	0	0	0	0	0	0	0	0	0	0	0	0	0	0	0
231	Q15052	ARHGEF6	Rho guanine nucleotide exchange factor 6 OS=Homo sapiens OX=9606 GN=ARHGEF6 PE=1 SV=2					0	0	0	1	0	0	0	0	0	0	0	0	0	0	0	0	0	0	0	0	0	0	0	0	0	0	0	0	0	308.26	255.045	274.71	332.521	306.664	346.792	0	0	0	0	0	0	0
232	Q14155	ARHGEF7	Rho guanine nucleotide exchange factor 7 OS=Homo sapiens OX=9606 GN=ARHGEF7 PE=1 SV=2					1	4	3	3	3	3	3	0	1	0	0	31.5007	35.6295	32.3501	40.4655	51.4059	30.4228	271.153	237.477	242.943	276.019	292.147	244.357	96.8085	83.5173	83.3524	92.8136	90.9454	99.7286	92.7747	83.7917	93.293	112.439	100.06	115.674	200.426	172.544	185.855	198.039	185.321	214.042	88.3112
233	O14497	ARID1A	AT-rich interactive domain-containing protein 1A OS=Homo sapiens OX=9606 GN=ARID1A PE=1 SV=3					0	2	0	0	0	0	1	0	0	0	0	0	0	0	0	0	0	61.0076	62.986	60.878	67.6301	25.1434	65.4342	0	0	0	0	0	0	0	0	0	0	0	0	0	0	0	0	0	0	0
234	Q8NFD5	ARID1B	AT-rich interactive domain-containing protein 1B OS=Homo sapiens OX=9606 GN=ARID1B PE=1 SV=2					0	1	0	0	0	0	0	0	0	0	0	0	0	0	0	0	0	42.5595	39.3379	38.2849	39.6362	74.4559	42.7283	0	0	0	0	0	0	0	0	0	0	0	0	0	0	0	0	0	0	0
235	Q68CP9	ARID2	AT-rich interactive domain-containing protein 2 OS=Homo sapiens OX=9606 GN=ARID2 PE=1 SV=2					0	1	0	1	0	0	1	0	2	0	0	0	0	0	0	0	0	17.3005	26.9434	22.3617	19.6261	30.4011	17.0234	0	0	0	0	0	0	39.8963	43.7722	39.9889	31.0876	36.5994	34.1657	0	0	0	0	0	0	0
236	Q9Y4X5	ARIH1	E3 ubiquitin-protein ligase ARIH1 OS=Homo sapiens OX=9606 GN=ARIH1 PE=1 SV=2			E3 ligase		0	4	3	4	2	3	3	3	2	3	1	0	0	0	0	0	0	365.078	334.11	332.828	371.703	77.3132	368.056	99.6907	87.3646	93.7788	103.525	101.768	94.2015	315.739	319.335	292.423	369.842	400.409	380.602	79.4623	92.3997	110.075	107.537	111.239	106.914	186.925
237	O95376	ARIH2	E3 ubiquitin-protein ligase ARIH2 OS=Homo sapiens OX=9606 GN=ARIH2 PE=1 SV=1			E3 ligase		0	0	2	0	0	0	0	0	0	0	0	0	0	0	0	0	0	0	0	0	0	0	0	80.8549	76.5202	74.7531	70.8361	78.7229	68.2713	0	0	0	0	0	0	0	0	0	0	0	0	0
238	P40616	ARL1	ADP-ribosylation factor-like protein 1 OS=Homo sapiens OX=9606 GN=ARL1 PE=1 SV=1					4	0	1	0	0	0	0	0	0	0	0	178.6	169.025	161.577	178.181	240.689	173.649	0	0	0	0	0	0	95.3049	93.4646	88.9259	103.034	93.0298	94.7429	0	0	0	0	0	0	0	0	0	0	0	0	0
239	P36404	ARL2	ADP-ribosylation factor-like protein 2 OS=Homo sapiens OX=9606 GN=ARL2 PE=1 SV=4					2	0	0	0	0	0	0	1	0	0	0	144.958	165.985	143.76	162.81	204.743	173.131	0	0	0	0	0	0	0	0	0	0	0	0	0	0	0	0	0	0	0	0	0	0	0	0	0
240	Q9Y2Y0	ARL2BP	ADP-ribosylation factor-like protein 2-binding protein OS=Homo sapiens OX=9606 GN=ARL2BP PE=1 SV=1					1	0	0	0	0	0	0	0	0	0	0	17.6983	10.5139	11.3926	12.1299	16.3474	15.2744	0	0	0	0	0	0	0	0	0	0	0	0	0	0	0	0	0	0	0	0	0	0	0	0	0
241	P36405	ARL3	ADP-ribosylation factor-like protein 3 OS=Homo sapiens OX=9606 GN=ARL3 PE=1 SV=2					1	0	0	0	0	0	0	0	0	0	0	87.2632	101.719	100.559	91.6508	146.545	115.584	0	0	0	0	0	0	0	0	0	0	0	0	0	0	0	0	0	0	0	0	0	0	0	0	0
242	Q66PJ3	ARL6IP4	ADP-ribosylation factor-like protein 6-interacting protein 4 OS=Homo sapiens OX=9606 GN=ARL6IP4 PE=1 SV=2					0	0	0	0	0	0	0	0	0	1	0	0	0	0	0	0	0	0	0	0	0	0	0	0	0	0	0	0	0	0	0	0	0	0	0	0	0	0	0	0	0	0
243	Q9NVJ2	ARL8B	ADP-ribosylation factor-like protein 8B OS=Homo sapiens OX=9606 GN=ARL8B PE=1 SV=1					3	0	1	0	0	0	0	0	0	0	0	130.072	149.53	141.964	148.515	116.292	137.038	0	0	0	0	0	0	73.4451	67.5567	71.6608	86.1739	70.6524	95.9388	0	0	0	0	0	0	0	0	0	0	0	0	0
244	Q9NVT9	ARMC1	Armadillo repeat-containing protein 1 OS=Homo sapiens OX=9606 GN=ARMC1 PE=1 SV=1					1	0	0	0	0	0	0	0	0	0	0	37.8285	43.1908	43.491	42.7305	65.1164	40.6226	0	0	0	0	0	0	0	0	0	0	0	0	0	0	0	0	0	0	0	0	0	0	0	0	0
245	Q8N2F6	ARMC10	Armadillo repeat-containing protein 10 OS=Homo sapiens OX=9606 GN=ARMC10 PE=1 SV=1					1	0	0	0	0	0	0	0	0	0	0	21.4709	24.5813	21.7797	22.7512	11.7631	20.8969	0	0	0	0	0	0	0	0	0	0	0	0	0	0	0	0	0	0	0	0	0	0	0	0	0
246	Q96C12	ARMC5	Armadillo repeat-containing protein 5 OS=Homo sapiens OX=9606 GN=ARMC5 PE=1 SV=2					0	0	0	0	0	1	0	0	0	0	0	0	0	0	0	0	0	0	0	0	0	0	0	0	0	0	0	0	0	0	0	0	0	0	0	0	0	0	0	0	0	116.374
247	Q6NXE6	ARMC6	Armadillo repeat-containing protein 6 OS=Homo sapiens OX=9606 GN=ARMC6 PE=1 SV=2					0	1	2	3	2	2	0	2	1	0	0	0	0	0	0	0	0	149.844	151.656	152.007	173.286	243.106	171.42	210.379	213.146	191.938	258.221	231.686	230.303	302.057	317.184	343.29	403.563	422.523	384.747	219.179	248.876	283.74	306.268	324.438	307.098	190.179
248	Q8IUR7	ARMC8	Armadillo repeat-containing protein 8 OS=Homo sapiens OX=9606 GN=ARMC8 PE=1 SV=2					0	0	1	0	0	0	0	0	0	0	0	0	0	0	0	0	0	0	0	0	0	0	0	79.1956	86.3228	82.2812	103.942	86.1755	93.8289	0	0	0	0	0	0	0	0	0	0	0	0	0
249	Q9H993	ARMT1	Protein-glutamate O-methyltransferase OS=Homo sapiens OX=9606 GN=ARMT1 PE=1 SV=1					3	1	0	0	0	0	0	0	0	0	0	137.564	144.015	149.301	167.441	196.321	151.454	50.2957	49.513	43.9558	55.1414	29.6767	56.5486	0	0	0	0	0	0	0	0	0	0	0	0	0	0	0	0	0	0	0
250	O15143	ARPC1B	Actin-related protein 2/3 complex subunit 1B OS=Homo sapiens OX=9606 GN=ARPC1B PE=1 SV=3					2	2	1	1	0	0	0	3	1	1	0	73.2108	75.0935	68.348	98.374	30.3043	72.9676	89.3399	91.9279	84.9161	97.9911	55.6244	105.909	38.3092	35.6535	37.5055	37.9645	39.0829	30.1687	100.917	125.78	114.378	137.242	132.46	104.359	0	0	0	0	0	0	0
251	O15144	ARPC2	Actin-related protein 2/3 complex subunit 2 OS=Homo sapiens OX=9606 GN=ARPC2 PE=1 SV=1					0	6	1	1	0	0	0	0	1	1	1	0	0	0	0	0	0	427.009	415.64	363.58	464.298	216.44	586.646	21.1141	18.051	17.022	21.4872	19.5474	21.062	119.227	139.831	112.02	146.333	150.361	166.167	0	0	0	0	0	0	0
252	O15145	ARPC3	Actin-related protein 2/3 complex subunit 3 OS=Homo sapiens OX=9606 GN=ARPC3 PE=1 SV=3					2	1	2	2	2	2	0	1	2	1	0	36.2817	37.6305	36.5626	46.6067	81.839	33.1301	93.522	84.4468	83.6986	105.226	60.5889	111.14	120.321	118.373	98.4448	125.332	110.941	129.803	72.9965	69.9398	72.1333	91.4788	72.4697	86.3755	388.833	404.153	426.773	473.097	455.072	465.265	120.648
253	P59998	ARPC4	Actin-related protein 2/3 complex subunit 4 OS=Homo sapiens OX=9606 GN=ARPC4 PE=1 SV=3					4	3	0	0	0	0	0	0	0	0	0	205.679	209.003	195.01	230.789	42.2903	206.999	160.715	179.221	143.262	181.389	83.2875	224.468	0	0	0	0	0	0	0	0	0	0	0	0	0	0	0	0	0	0	0
254	O15511	ARPC5	Actin-related protein 2/3 complex subunit 5 OS=Homo sapiens OX=9606 GN=ARPC5 PE=1 SV=3					2	1	1	0	0	0	0	0	0	0	0	73.2772	66.3024	67.9805	77.7343	106.423	55.1733	106.127	111.627	88.4357	106.42	127.867	151.172	24.6655	21.2153	24.4297	32.5214	24.6002	23.6728	0	0	0	0	0	0	0	0	0	0	0	0	0
255	Q9BPX5	ARPC5L	Actin-related protein 2/3 complex subunit 5-like protein OS=Homo sapiens OX=9606 GN=ARPC5L PE=1 SV=1					1	1	0	0	0	0	1	0	0	0	2	12.4058	13.009	19.3849	19.3312	5.96636	16.1974	26.3312	29.7429	24.2805	37.211	9.09374	40.1817	0	0	0	0	0	0	0	0	0	0	0	0	0	0	0	0	0	0	0
256	P32121	ARRB2	Beta-arrestin-2 OS=Homo sapiens OX=9606 GN=ARRB2 PE=1 SV=2					1	0	0	0	1	0	0	0	0	0	0	43.3515	45.526	42.3412	48.8006	67.5849	47.4318	0	0	0	0	0	0	0	0	0	0	0	0	0	0	0	0	0	0	67.3194	77.8313	77.2815	79.4157	76.522	78.6256	0
257	Q8N5I2	ARRDC1	Arrestin domain-containing protein 1 OS=Homo sapiens OX=9606 GN=ARRDC1 PE=1 SV=1					0	2	0	0	0	0	0	0	0	0	0	0	0	0	0	0	0	131.211	128.114	141.255	164.848	246.972	136.639	0	0	0	0	0	0	0	0	0	0	0	0	0	0	0	0	0	0	0
258	O00192	ARVCF	Armadillo repeat protein deleted in velo-cardio-facial syndrome OS=Homo sapiens OX=9606 GN=ARVCF PE=1 SV=1					0	1	0	0	0	1	0	1	0	0	0	0	0	0	0	0	0	19.4845	20.2383	18.1106	25.7125	4.98246	18.3356	0	0	0	0	0	0	0	0	0	0	0	0	0	0	0	0	0	0	47.3212
259	Q13510	ASAH1	Acid ceramidase OS=Homo sapiens OX=9606 GN=ASAH1 PE=1 SV=5					1	0	0	0	0	0	0	0	0	0	0	74.2878	70.3897	64.9578	75.1341	18.0825	63.1392	0	0	0	0	0	0	0	0	0	0	0	0	0	0	0	0	0	0	0	0	0	0	0	0	0
260	Q8N9N2	ASCC1	Activating signal cointegrator 1 complex subunit 1 OS=Homo sapiens OX=9606 GN=ASCC1 PE=1 SV=1					0	2	0	0	0	0	0	0	0	0	0	0	0	0	0	0	0	81.1915	78.8221	83.3896	83.5403	65.3622	84.4432	0	0	0	0	0	0	0	0	0	0	0	0	0	0	0	0	0	0	0
261	Q9H1I8	ASCC2	Activating signal cointegrator 1 complex subunit 2 OS=Homo sapiens OX=9606 GN=ASCC2 PE=1 SV=3					0	0	3	3	2	1	2	1	3	2	0	0	0	0	0	0	0	0	0	0	0	0	0	160.281	139.13	134.219	184.671	134.501	165.458	120.269	109.272	107.913	161.088	117.809	157.167	236.579	223.708	233.093	303.369	227.774	291.476	37.2849
262	Q8N3C0	ASCC3	Activating signal cointegrator 1 complex subunit 3 OS=Homo sapiens OX=9606 GN=ASCC3 PE=1 SV=3					0	0	4	2	2	1	5	3	4	3	1	0	0	0	0	0	0	0	0	0	0	0	0	598.994	567.327	466.638	663.579	515.678	549.183	499.956	570.306	483.636	737.075	624.426	684.257	93.3172	99.6227	108.988	129.772	108.24	118.128	62.6358
263	L0R819	ASDURF	ASNSD1 upstream open reading frame protein OS=Homo sapiens OX=9606 GN=ASDURF PE=1 SV=1					0	1	0	1	0	0	0	0	0	0	0	0	0	0	0	0	0	23.641	24.8237	19.6805	33.2163	10.3908	26.003	0	0	0	0	0	0	41.3172	39.3768	46.8749	40.4547	42.3373	46.7697	0	0	0	0	0	0	0
264	Q9UBL3	ASH2L	Set1/Ash2 histone methyltransferase complex subunit ASH2 OS=Homo sapiens OX=9606 GN=ASH2L PE=1 SV=1					2	1	2	1	1	2	0	1	1	1	0	178.195	179.809	174.053	210.458	277.005	169.344	24.6593	22.5073	20.2699	20.4219	24.5903	20.1827	218.182	212.353	178.732	208.33	205.304	197.075	52.1082	69.2134	63.7073	71.5615	67.1213	61.952	143.526	160.347	183.157	171.99	169.885	157.326	210.267
265	O95671	ASMTL	N-acetylserotonin O-methyltransferase-like protein OS=Homo sapiens OX=9606 GN=ASMTL PE=1 SV=3					1	0	1	2	2	2	1	2	2	1	4	17.0554	20.6629	13.4484	26.0122	11.587	22.4972	0	0	0	0	0	0	60.4551	60.3723	61.6011	69.1355	67.9636	71.3388	48.2438	50.8917	47.89	59.7338	71.9118	69.5721	163.47	152.885	187.936	190.217	220.96	200.317	222.908
266	O43681	ASNA1	ATPase ASNA1 OS=Homo sapiens OX=9606 GN=ASNA1 PE=1 SV=2					3	5	1	2	1	0	0	0	0	0	0	218.832	212.742	204.69	224.68	239.004	211.443	711.959	617.668	663.319	639.59	729.046	632.626	19.5377	19.2624	18.0064	20.9332	14.3987	23.2215	121.101	136.822	125.881	153.034	123.187	171.312	15.9506	15.16	15.3296	13.3938	12.8258	17.2565	0
267	P08243	ASNS	Asparagine synthetase [glutamine-hydrolyzing] OS=Homo sapiens OX=9606 GN=ASNS PE=1 SV=4					3	3	5	4	4	4	4	5	4	3	4	204.891	203.564	215.833	250.413	121.262	212.534	434.895	398.242	430.584	446.141	421.101	427.833	973.555	918.825	926.897	1024.24	895.904	994.638	575.361	578.365	618.059	687.154	666.578	634.872	712.237	771.385	886.888	858.235	804.655	791.594	528.125
268	Q12797	ASPH	Aspartyl/asparaginyl beta-hydroxylase OS=Homo sapiens OX=9606 GN=ASPH PE=1 SV=3					2	3	3	2	4	4	2	4	1	3	2	242.283	254.935	246.539	266.435	412.081	199.781	112.452	105.188	102.856	115.187	42.5889	126.627	336.706	276.697	300.97	372.467	314.235	364.981	72.2904	74.1472	58.8158	70.1616	67.3672	78.2786	516.471	430.552	464.462	512.269	421.333	486.557	259.19
269	Q53RT3	ASPRV1	Retroviral-like aspartic protease 1 OS=Homo sapiens OX=9606 GN=ASPRV1 PE=1 SV=1					0	0	0	0	0	0	0	0	0	0	1	0	0	0	0	0	0	0	0	0	0	0	0	0	0	0	0	0	0	0	0	0	0	0	0	0	0	0	0	0	0	0
270	Q9BZE9	ASPSCR1	Tether containing UBX domain for GLUT4 OS=Homo sapiens OX=9606 GN=ASPSCR1 PE=1 SV=1					0	2	0	0	0	0	0	0	0	0	0	0	0	0	0	0	0	137.189	124.601	114.076	141.966	155.455	138.393	0	0	0	0	0	0	0	0	0	0	0	0	0	0	0	0	0	0	0
271	P00966	ASS1	Argininosuccinate synthase OS=Homo sapiens OX=9606 GN=ASS1 PE=1 SV=2					2	0	0	0	0	0	0	0	0	0	0	110.607	104.003	98.5598	106.203	78.0877	101.599	0	0	0	0	0	0	0	0	0	0	0	0	0	0	0	0	0	0	0	0	0	0	0	0	0
272	Q8IXJ9	ASXL1	Putative Polycomb group protein ASXL1 OS=Homo sapiens OX=9606 GN=ASXL1 PE=1 SV=4					0	0	1	0	0	0	0	0	0	0	0	0	0	0	0	0	0	0	0	0	0	0	0	11.3951	16.1252	13.1951	15.425	13.9254	15.0167	0	0	0	0	0	0	0	0	0	0	0	0	0
273	Q8NBU5	ATAD1	ATPase family AAA domain-containing protein 1 OS=Homo sapiens OX=9606 GN=ATAD1 PE=1 SV=1					0	1	0	0	0	0	2	1	1	0	1	0	0	0	0	0	0	58.4509	62.6859	64.9826	66.6712	65.3108	74.858	0	0	0	0	0	0	0	0	0	0	0	0	0	0	0	0	0	0	0
274	Q6PL18	ATAD2	ATPase family AAA domain-containing protein 2 OS=Homo sapiens OX=9606 GN=ATAD2 PE=1 SV=1					0	0	2	1	0	2	0	1	1	0	0	0	0	0	0	0	0	0	0	0	0	0	0	184.686	192.568	200.545	208.292	194.143	193.799	46.8406	49.47	48.3641	52.8224	45.6049	50.922	0	0	0	0	0	0	232.761
275	Q9NVI7	ATAD3A	ATPase family AAA domain-containing protein 3A OS=Homo sapiens OX=9606 GN=ATAD3A PE=1 SV=2					0	2	2	2	1	2	2	3	2	4	2	0	0	0	0	0	0	69.6893	82.7205	93.1633	82.6234	54.7182	90.669	87.906	103.975	101.038	91.2671	79.371	107.898	106.18	102.26	126.233	128.665	116.919	137.554	16.8439	11.8776	17.9357	15.6106	14.904	18.282	90.9433
276	Q5T9A4	ATAD3B	ATPase family AAA domain-containing protein 3B OS=Homo sapiens OX=9606 GN=ATAD3B PE=1 SV=1					0	2	3	2	4	3	3	3	3	3	3	0	0	0	0	0	0	97.5447	118.104	136.785	122.936	99.4885	101.126	246.995	283.14	338.81	304.097	285.501	324.107	102.478	90.705	94.3638	121.757	95.4913	111.038	329.561	341.79	459.589	407.465	396.4	440.287	199.449
277	Q96QE3	ATAD5	ATPase family AAA domain-containing protein 5 OS=Homo sapiens OX=9606 GN=ATAD5 PE=1 SV=4					0	1	0	1	1	0	0	1	0	0	0	0	0	0	0	0	0	27.0435	26.8367	26.421	30.6173	37.7425	28.7127	0	0	0	0	0	0	20.9791	18.6709	22.4265	23.3742	21.3548	23.3098	14.3256	12.4488	14.4103	14.4512	13.8232	15.2325	0
278	O95260	ATE1	Arginyl-tRNA--protein transferase 1 OS=Homo sapiens OX=9606 GN=ATE1 PE=1 SV=2					0	1	0	0	1	0	0	0	0	0	0	0	0	0	0	0	0	41.8599	43.4779	48.9465	39.7358	67.4614	48.1373	0	0	0	0	0	0	0	0	0	0	0	0	53.3054	55.2827	70.4981	48.1959	67.1616	43.8062	0
279	Q9BSB4	ATG101	Autophagy-related protein 101 OS=Homo sapiens OX=9606 GN=ATG101 PE=1 SV=1					1	1	0	0	0	0	0	0	0	0	0	17.6356	21.3472	20.5236	21.9976	2.60685	17.7538	19.2229	18.4017	22.6587	20.9926	0	19.138	0	0	0	0	0	0	0	0	0	0	0	0	0	0	0	0	0	0	0
280	O94817	ATG12	Ubiquitin-like protein ATG12 OS=Homo sapiens OX=9606 GN=ATG12 PE=1 SV=1					0	2	0	0	0	1	0	0	0	0	1	0	0	0	0	0	0	393.796	381.13	396.894	464.055	546.381	366.813	0	0	0	0	0	0	0	0	0	0	0	0	0	0	0	0	0	0	57.842
281	Q6ZNE5	ATG14	Beclin 1-associated autophagy-related key regulator OS=Homo sapiens OX=9606 GN=ATG14 PE=1 SV=1					0	0	0	0	0	0	0	1	0	0	0	0	0	0	0	0	0	0	0	0	0	0	0	0	0	0	0	0	0	0	0	0	0	0	0	0	0	0	0	0	0	0
282	Q676U5	ATG16L1	Autophagy-related protein 16-1 OS=Homo sapiens OX=9606 GN=ATG16L1 PE=1 SV=2					0	2	2	3	0	1	0	1	0	0	0	0	0	0	0	0	0	81.3068	80.341	79.2694	98.7711	76.0113	88.3452	102.119	81.6146	79.0964	96.4606	91.8331	87.1633	184.236	172.926	174.018	195.088	200.761	192.275	0	0	0	0	0	0	69.132
283	Q9NT62	ATG3	Ubiquitin-like-conjugating enzyme ATG3 OS=Homo sapiens OX=9606 GN=ATG3 PE=1 SV=1					1	0	0	0	0	0	0	0	0	0	0	16.4185	21.7825	23.0499	16.67	0	16.5783	0	0	0	0	0	0	0	0	0	0	0	0	0	0	0	0	0	0	0	0	0	0	0	0	0
284	Q9Y4P1	ATG4B	Cysteine protease ATG4B OS=Homo sapiens OX=9606 GN=ATG4B PE=1 SV=2					1	2	2	3	3	2	2	3	3	0	1	80.7777	76.6666	80.7512	106.44	5.14183	83.5456	171.954	162.166	158.889	190.856	218.042	163.122	50.4634	40.5721	34.7303	53.5505	48.4516	50.4911	90.3613	99.6346	97.3732	119.186	115.336	109.588	140.828	155.166	166.281	175.73	176.229	181.95	84.2732
285	Q9H1Y0	ATG5	Autophagy protein 5 OS=Homo sapiens OX=9606 GN=ATG5 PE=1 SV=2					0	2	3	2	2	1	0	1	1	0	1	0	0	0	0	0	0	139.153	141.115	137.791	157.73	217.331	133.92	237.36	202.693	199.328	247.794	221.628	226.293	169.893	147.687	172.134	187.108	166.045	170.551	303.465	259.898	299.721	291.232	300.357	263.415	252.576
286	O95352	ATG7	Ubiquitin-like modifier-activating enzyme ATG7 OS=Homo sapiens OX=9606 GN=ATG7 PE=1 SV=1					1	0	0	1	1	1	0	0	0	0	0	61.5599	61.1249	59.7458	72.2985	89.862	61.3842	0	0	0	0	0	0	0	0	0	0	0	0	75.983	76.6467	76.3168	92.7408	92.0187	88.7188	82.2988	85.2329	87.1992	88.5253	86.4876	81.6956	181.317
287	P31939	ATIC	Bifunctional purine biosynthesis protein PURH OS=Homo sapiens OX=9606 GN=ATIC PE=1 SV=3					3	3	2	3	2	0	2	0	0	0	0	83.9558	93.707	96.2212	95.4817	106.747	95.4127	290.284	277.282	291.191	310.186	251.518	364.939	80.0508	87.525	74.5612	86.2054	85.9966	88.6249	143.142	126.307	154.399	153.69	141.056	149.5	174.565	187.014	194.598	162.46	163.312	169.041	0
288	Q8NHH9	ATL2	Atlastin-2 OS=Homo sapiens OX=9606 GN=ATL2 PE=1 SV=2					1	1	1	2	2	2	0	1	0	0	0	101.426	102.025	91.137	105.748	46.6659	96.3336	111.868	101.148	98.3724	102.079	35.8702	101.442	57.7127	52.5856	44.0891	56.0161	43.922	52.6675	244.439	232.044	212.252	250.112	201.493	252.863	349.82	333.306	320.981	334.234	271.207	377.278	280.371
289	Q6DD88	ATL3	Atlastin-3 OS=Homo sapiens OX=9606 GN=ATL3 PE=1 SV=1					3	1	0	0	0	0	0	0	0	0	0	96.8266	107.452	102.978	124.135	222.143	102.231	168.386	153.541	153.958	154.999	188.838	145.875	0	0	0	0	0	0	0	0	0	0	0	0	0	0	0	0	0	0	0
290	O00244	ATOX1	Copper transport protein ATOX1 OS=Homo sapiens OX=9606 GN=ATOX1 PE=1 SV=1					1	0	0	0	0	0	0	0	0	0	0	43.2207	51.5537	46.5073	49.01	51.9089	44.54	0	0	0	0	0	0	0	0	0	0	0	0	0	0	0	0	0	0	0	0	0	0	0	0	0
291	Q9Y2G3	ATP11B	Probable phospholipid-transporting ATPase IF OS=Homo sapiens OX=9606 GN=ATP11B PE=1 SV=2					1	0	0	0	0	0	0	0	0	0	0	56.3034	52.7116	36.5324	56.4656	0	49.9886	0	0	0	0	0	0	0	0	0	0	0	0	0	0	0	0	0	0	0	0	0	0	0	0	0
292	Q9HD20	ATP13A1	Manganese-transporting ATPase 13A1 OS=Homo sapiens OX=9606 GN=ATP13A1 PE=1 SV=2					2	3	1	3	3	3	1	2	0	2	1	134.462	159.59	144.327	155.84	189.193	127.76	157.352	147.759	160.05	160.155	96.6072	163.998	141.097	115.027	122.168	144.575	123.988	155.697	176.855	161.374	180.565	225.726	204.214	246.508	743.935	748.231	829.373	833.436	795.892	954.025	432.918
293	Q9H7F0	ATP13A3	Probable cation-transporting ATPase 13A3 OS=Homo sapiens OX=9606 GN=ATP13A3 PE=1 SV=4					0	0	1	0	0	0	0	0	0	0	0	0	0	0	0	0	0	0	0	0	0	0	0	18.9745	21.0362	23.7129	25.2542	20.8082	21.8403	0	0	0	0	0	0	0	0	0	0	0	0	0
294	P05023	ATP1A1	Sodium/potassium-transporting ATPase subunit alpha-1 OS=Homo sapiens OX=9606 GN=ATP1A1 PE=1 SV=1					5	10	6	6	6	6	9	5	7	7	7	281.1	309.18	286.191	333.372	235.069	221.178	863.013	795.622	853.098	833	649.607	931.43	512.017	497.898	528.157	595.295	487.021	793.013	452.6	444.911	520.71	596.917	494.619	799.931	563.669	570.095	697.543	735.823	628.889	1004.72	509.715
295	P05026	ATP1B1	Sodium/potassium-transporting ATPase subunit beta-1 OS=Homo sapiens OX=9606 GN=ATP1B1 PE=1 SV=1					2	4	3	2	1	2	1	1	1	0	1	94.9967	111.635	112.002	118.328	165.057	69.2822	261.235	255.469	252.857	247.709	98.9307	303.244	81.4225	67.9456	65.9205	90.624	60.2496	119.044	89.1203	74.4603	80.351	107.997	83.729	161.707	89.9079	69.9051	74.3154	99.061	70.8651	133.652	101.397
296	P54709	ATP1B3	Sodium/potassium-transporting ATPase subunit beta-3 OS=Homo sapiens OX=9606 GN=ATP1B3 PE=1 SV=1					1	2	4	4	2	3	0	1	0	0	2	71.1605	68.6709	63.546	60.8048	99.4685	52.1734	143.805	140.919	121.081	143.986	160.032	196.471	151.491	127.247	111.386	174.216	115.38	283.065	153.172	119.654	114.206	166.697	122.525	281.35	38.6761	41.0494	32.4283	49.2424	35.3282	92.959	159.648
297	P16615	ATP2A2	Sarcoplasmic/endoplasmic reticulum calcium ATPase 2 OS=Homo sapiens OX=9606 GN=ATP2A2 PE=1 SV=1					4	8	7	6	5	7	6	7	8	8	4	127.034	136.485	123.639	136.295	109.234	101.163	489.519	470.751	478.386	498.758	217.685	480.21	398.31	359.043	400.97	422.892	364.622	417.1	220.855	206.904	215.232	242.819	243.021	263.654	363.766	380.374	428.439	461.605	414.496	456.76	347.81
298	P20020	ATP2B1	Plasma membrane calcium-transporting ATPase 1 OS=Homo sapiens OX=9606 GN=ATP2B1 PE=1 SV=4					1	0	1	2	0	0	0	0	0	0	0	49.0967	47.2964	47.513	45.0113	5.0172	35.449	0	0	0	0	0	0	18.2595	18.9246	16.3365	18.6906	14.6868	28.0209	54.0199	51.4453	52.8834	62.5282	52.5179	99.5742	0	0	0	0	0	0	0
299	P98194	ATP2C1	Calcium-transporting ATPase type 2C member 1 OS=Homo sapiens OX=9606 GN=ATP2C1 PE=1 SV=3					0	1	1	1	1	0	0	0	0	0	0	0	0	0	0	0	0	56.5389	55.2004	59.4813	57.446	43.5707	58.0988	21.9976	24.0235	27.2032	28.9058	21.7009	31.4603	88.749	88.6836	77.7736	100.969	99.4744	119.684	104.355	103.368	117.776	111.785	99.9165	124.857	0
300	Q5VTU8	ATP5EP2	ATP synthase subunit epsilon-like protein, mitochondrial OS=Homo sapiens OX=9606 GN=ATP5EP2 PE=3 SV=1					0	1	1	0	0	0	0	0	0	0	0	0	0	0	0	0	0	79.7157	72.3268	78.4767	70.1336	97.7432	70.5772	51.2208	46.3923	48.7965	52.673	51.4319	69.6012	0	0	0	0	0	0	0	0	0	0	0	0	0
301	P25705	ATP5F1A	ATP synthase subunit alpha, mitochondrial OS=Homo sapiens OX=9606 GN=ATP5F1A PE=1 SV=1					2	6	3	5	4	5	4	4	4	3	5	88.5467	152.436	134.224	131.97	52.7822	86.0631	1068.95	964.513	1002.58	1041.37	415.644	1043.85	395.792	348.264	129.502	360.239	390.978	448.764	409.684	368.935	374.375	454.201	432.459	574.325	488.295	486.969	508.744	577.926	514.195	631.654	761.699
302	P06576	ATP5F1B	ATP synthase subunit beta, mitochondrial OS=Homo sapiens OX=9606 GN=ATP5F1B PE=1 SV=3					3	4	5	5	4	3	5	5	4	4	5	173.868	235.81	190.275	209.734	172.02	145.566	479.541	398.995	509.248	498.308	461.7	433.568	404.724	317.792	389.512	442.503	409.143	444.504	442.228	379.259	412.629	502.7	428.881	549.602	410.838	360.6	402.204	410.839	365.333	438.128	429.553
303	P36542	ATP5F1C	ATP synthase subunit gamma, mitochondrial OS=Homo sapiens OX=9606 GN=ATP5F1C PE=1 SV=1					3	2	3	3	3	1	3	2	2	3	4	203.912	341.37	308.731	302.719	41.5462	178.741	184.135	190.828	179.032	199.781	72.4749	195.152	607.331	596.247	484.523	638.698	570.133	678.652	291.014	297.86	274.569	354.73	335.002	420.148	856.322	1084.04	1042.49	1261.61	1148.28	1308.55	109.533
304	P30049	ATP5F1D	ATP synthase subunit delta, mitochondrial OS=Homo sapiens OX=9606 GN=ATP5F1D PE=1 SV=2					2	3	2	2	3	2	2	2	1	3	3	55.4266	64.0702	62.6678	69.9525	0	46.7668	295.978	287.44	310.615	300.135	42.9076	279.91	257.12	217.615	247.136	238.256	247.715	274.59	212.795	182.204	257.101	277.73	241.002	232.272	193.549	174.927	199.581	228.101	193.987	242.345	337.545
305	P56381	ATP5F1E	ATP synthase subunit epsilon, mitochondrial OS=Homo sapiens OX=9606 GN=ATP5F1E PE=1 SV=2					0	2	0	0	0	0	0	0	0	0	0	0	0	0	0	0	0	46.5911	50.2647	47.8744	55.6009	401.825	32.1091	0	0	0	0	0	0	0	0	0	0	0	0	0	0	0	0	0	0	0
306	Q9UII2	ATP5IF1	ATPase inhibitor, mitochondrial OS=Homo sapiens OX=9606 GN=ATP5IF1 PE=1 SV=1					0	0	1	0	0	0	0	0	0	0	0	0	0	0	0	0	0	0	0	0	0	0	0	46.4953	45.6831	27.8155	44.162	49.2871	55.246	0	0	0	0	0	0	0	0	0	0	0	0	0
307	P48201	ATP5MC3	ATP synthase F(0) complex subunit C3, mitochondrial OS=Homo sapiens OX=9606 GN=ATP5MC3 PE=2 SV=1					0	1	1	1	1	1	1	1	1	1	1	0	0	0	0	0	0	467.229	415.571	462.687	432.724	551.779	385.965	488.855	395.629	427.62	490.86	401.344	481.57	333.199	308.433	323.42	441.711	359.922	452.934	444.094	407.535	460.92	543.65	438.519	590.263	401.131
308	Q96IX5	ATP5MD	Up-regulated during skeletal muscle growth protein 5 OS=Homo sapiens OX=9606 GN=ATP5MD PE=1 SV=1					0	1	1	1	1	1	0	1	1	1	1	0	0	0	0	0	0	38.6009	35.7189	37.4104	45.8035	9.34476	38.0324	15.4061	20.7005	12.5114	18.0554	16.8271	20.5637	15.7745	17.3387	12.4208	23.2112	20.7194	22.7303	13.5502	15.9737	17.5736	19.8444	21.4314	17.0708	42.5358
309	P56385	ATP5ME	ATP synthase subunit e, mitochondrial OS=Homo sapiens OX=9606 GN=ATP5ME PE=1 SV=2					2	3	2	1	0	1	1	1	0	1	1	93.2421	111.926	117.995	104.793	54.3417	70.2709	619.052	612.549	560.798	659.814	292.898	640.77	179.009	161.557	143.443	210.738	176.408	228.214	13.4935	11.0606	11.4578	16.8434	16.5518	17.6592	0	0	0	0	0	0	103.699
310	P56134	ATP5MF	ATP synthase subunit f, mitochondrial OS=Homo sapiens OX=9606 GN=ATP5MF PE=1 SV=3					2	2	3	2	2	3	2	2	3	1	1	170.834	192.863	189.216	191.143	22.3354	129.413	126.405	133.01	123.214	147.588	23.485	143.409	140.416	118.587	108.335	139.144	126.309	157.559	81.8489	92.7926	91.9665	103.638	129.436	116.578	172.985	207.289	251.301	259.693	276.879	242.082	230.038
311	O75964	ATP5MG	ATP synthase subunit g, mitochondrial OS=Homo sapiens OX=9606 GN=ATP5MG PE=1 SV=3					3	2	3	3	1	2	2	3	3	1	2	118.19	161.168	168.935	149.749	172.839	93.3954	169.335	155.201	127.183	162.119	144.818	163.966	339.094	353.385	265.403	408.483	324.739	419.211	211.933	225.942	226.042	298.16	297.88	372.678	42.9974	41.8906	52.0706	52.838	47.6787	55.2635	152.925
312	P24539	ATP5PB	ATP synthase F(0) complex subunit B1, mitochondrial OS=Homo sapiens OX=9606 GN=ATP5PB PE=1 SV=2					3	4	3	3	3	3	3	3	3	2	2	234.792	299.786	277.153	300.376	29.253	153.153	524.804	507.332	522.264	657.472	445.816	584.684	356.209	345.592	322.469	406.892	339.339	427.133	237.283	185.405	272.816	285.138	268.055	298.541	261.626	261.948	295.873	374.754	294.104	373.44	535.715
313	O75947	ATP5PD	ATP synthase subunit d, mitochondrial OS=Homo sapiens OX=9606 GN=ATP5PD PE=1 SV=3					2	4	5	2	3	4	3	3	4	2	2	56.4786	94.8349	84.0093	75.5361	105.236	48.1483	561.013	619.849	534.966	649.037	752.756	579.527	517.557	467.362	476.341	580.704	549.657	686.647	275.708	227.815	278.882	289.658	282.941	383.381	628.903	626.27	688.075	708.447	668.379	821.062	688.573
314	P18859	ATP5PF	ATP synthase-coupling factor 6, mitochondrial OS=Homo sapiens OX=9606 GN=ATP5PF PE=1 SV=1					0	4	4	3	1	2	4	1	2	1	1	0	0	0	0	0	0	456.482	456.518	505.828	617.436	347.673	412.14	339.1	317.121	280.457	385.13	365.296	456.78	227.847	200.758	252.447	231.037	239.472	312.72	22.1179	23.664	26.0522	21.6641	22.8316	29.6122	162.665
315	P48047	ATP5PO	ATP synthase subunit O, mitochondrial OS=Homo sapiens OX=9606 GN=ATP5PO PE=1 SV=1					4	4	4	4	4	3	4	4	1	3	3	119.908	148.526	128.136	147.49	125.036	96.8114	379.825	368.708	378.59	408.818	332.22	379.27	401.738	328.025	373.235	432.012	349.99	436.118	359.182	316.511	346.204	412.986	372.353	479.823	391.101	375.21	423.418	469.035	415.507	507.785	369.213
316	Q15904	ATP6AP1	V-type proton ATPase subunit S1 OS=Homo sapiens OX=9606 GN=ATP6AP1 PE=1 SV=2					1	0	1	1	0	1	1	1	2	2	2	80.0618	84.6297	75.6116	82.1183	109.718	57.3128	0	0	0	0	0	0	21.7744	14.9494	15.7032	20.809	16.9467	36.9822	33.6701	32.51	28.6567	38.4949	36.5582	69.4033	0	0	0	0	0	0	76.0234
317	O75787	ATP6AP2	Renin receptor OS=Homo sapiens OX=9606 GN=ATP6AP2 PE=1 SV=2					1	1	0	0	1	1	1	1	1	1	1	25.5314	25.9824	27.8802	31.4017	13.7945	14.8416	29.5001	29.4794	28.4965	28.5338	36.1378	33.0403	0	0	0	0	0	0	0	0	0	0	0	0	30.4909	33.5385	28.1068	45.5548	42.3397	49.3467	26.054
318	Q93050	ATP6V0A1	V-type proton ATPase 116 kDa subunit a isoform 1 OS=Homo sapiens OX=9606 GN=ATP6V0A1 PE=1 SV=3					0	1	2	1	1	3	2	5	3	2	1	0	0	0	0	0	0	17.8669	15.8452	16.6336	18.9848	15.8212	20.8612	248.453	193.959	223.99	366.266	226.992	320.328	19.9289	20.0682	19.1926	29.2723	25.6552	34.791	21.7795	21.8939	16.0676	38.2093	22.1597	33.8187	70.6324
319	Q9Y487	ATP6V0A2	V-type proton ATPase 116 kDa subunit a isoform 2 OS=Homo sapiens OX=9606 GN=ATP6V0A2 PE=1 SV=2					0	0	0	0	0	1	0	1	2	3	3	0	0	0	0	0	0	0	0	0	0	0	0	0	0	0	0	0	0	0	0	0	0	0	0	0	0	0	0	0	0	90.7716
320	P27449	ATP6V0C	V-type proton ATPase 16 kDa proteolipid subunit OS=Homo sapiens OX=9606 GN=ATP6V0C PE=1 SV=1					0	0	1	1	1	1	1	1	1	1	0	0	0	0	0	0	0	0	0	0	0	0	0	24.3138	28.5623	13.5693	27.6101	13.9523	38.8064	13.1587	11.1378	10.8941	17.4842	10.976	20.7261	20.3176	21.9222	19.003	32.0065	22.0613	33.5862	31.9101
321	P61421	ATP6V0D1	V-type proton ATPase subunit d 1 OS=Homo sapiens OX=9606 GN=ATP6V0D1 PE=1 SV=1					0	2	2	2	2	2	4	3	2	3	2	0	0	0	0	0	0	133.861	130.29	139.227	141.354	143.475	144.719	56.6661	61.4309	46.9312	71.6748	62.7048	78.8335	61.4855	64.7672	69.8677	97.5861	86.9115	99.0683	156.207	164.551	142.613	214.977	184.228	227.942	70.6576
322	P38606	ATP6V1A	V-type proton ATPase catalytic subunit A OS=Homo sapiens OX=9606 GN=ATP6V1A PE=1 SV=2					1	1	0	1	2	2	2	2	3	3	2	20.1565	19.9978	18.1943	16.6455	24.6357	17.1231	35.8591	37.2774	32.9229	35.1675	39.8809	31.5158	0	0	0	0	0	0	102.769	82.9529	75.0308	126.325	95.2541	110.93	115.638	90.9827	82.511	125.044	96.3249	115.5	188.122
323	P21281	ATP6V1B2	V-type proton ATPase subunit B, brain isoform OS=Homo sapiens OX=9606 GN=ATP6V1B2 PE=1 SV=3					3	3	2	0	0	1	1	2	4	0	1	137.483	141.649	135.751	156.52	126.064	135.824	195.522	207.827	194.266	201.034	118.948	218.857	177.171	168.395	143.542	205.203	162.582	214.948	0	0	0	0	0	0	0	0	0	0	0	0	32.5847
324	P21283	ATP6V1C1	V-type proton ATPase subunit C 1 OS=Homo sapiens OX=9606 GN=ATP6V1C1 PE=1 SV=4					3	0	0	2	1	0	0	1	1	0	0	156.856	159.629	146.676	162.081	154.592	158.418	0	0	0	0	0	0	0	0	0	0	0	0	154.85	146.873	140.697	158.093	133.294	146.418	46.2788	51.0471	48.0152	67.6495	49.2851	61.7619	0
325	P36543	ATP6V1E1	V-type proton ATPase subunit E 1 OS=Homo sapiens OX=9606 GN=ATP6V1E1 PE=1 SV=1					2	1	0	0	2	1	0	1	1	0	0	62.0008	65.3386	63.8064	62.1473	84.1633	63.8369	46.6122	52.3436	45.9472	55.184	55.4695	66.6894	0	0	0	0	0	0	0	0	0	0	0	0	160.864	157.256	136.505	192.326	174.893	194.407	95.4311
326	Q16864	ATP6V1F	V-type proton ATPase subunit F OS=Homo sapiens OX=9606 GN=ATP6V1F PE=1 SV=2					0	1	0	0	0	0	0	0	0	0	1	0	0	0	0	0	0	14.529	16.7068	13.8808	17.9131	9.78865	23.723	0	0	0	0	0	0	0	0	0	0	0	0	0	0	0	0	0	0	0
327	O75348	ATP6V1G1	V-type proton ATPase subunit G 1 OS=Homo sapiens OX=9606 GN=ATP6V1G1 PE=1 SV=3					1	1	1	1	1	0	1	1	1	1	0	26.2429	32.9978	28.8576	27.3314	13.881	22.3915	55.7012	72.0035	61.0727	88.8184	4.45056	69.1967	38.1811	37.6987	28.7969	48.7838	44.689	52.9245	48.97	37.6007	37.5708	57.0541	43.643	66.0875	65.7204	64.645	55.6637	88.6537	65.2982	80.5711	0
328	Q9UI12	ATP6V1H	V-type proton ATPase subunit H OS=Homo sapiens OX=9606 GN=ATP6V1H PE=1 SV=1					2	0	1	1	1	0	0	0	0	0	0	70.7094	66.1625	63.0349	77.2341	21.2248	64.5514	0	0	0	0	0	0	36.8203	37.5016	30.0281	35.3841	35.1819	35.4262	60.9729	61.063	59.6358	70.2362	74.5288	69.0882	62.3541	65.4753	73.6268	70.9683	77.9767	64.742	0
329	Q13535	ATR	Serine/threonine-protein kinase ATR OS=Homo sapiens OX=9606 GN=ATR PE=1 SV=3				Kinase	0	0	0	0	2	3	0	2	2	0	0	0	0	0	0	0	0	0	0	0	0	0	0	0	0	0	0	0	0	0	0	0	0	0	0	233.796	249.266	272.979	310.905	286.105	276.982	381.111
330	P46100	ATRX	Transcriptional regulator ATRX OS=Homo sapiens OX=9606 GN=ATRX PE=1 SV=5			E3 ligase		0	1	3	0	2	2	2	2	2	2	3	0	0	0	0	0	0	70.366	73.9849	68.6304	78.9751	10.3342	72.3733	150.495	129.071	124.913	149.882	133.219	133.224	0	0	0	0	0	0	86.7626	89.3301	94.3597	88.1068	84.4861	86.9599	249.471
331	Q9UBB4	ATXN10	Ataxin-10 OS=Homo sapiens OX=9606 GN=ATXN10 PE=1 SV=1					2	4	3	3	1	2	2	1	2	1	0	216.192	242.415	243.674	276.097	54.5629	246.103	258.246	293.076	303.154	359.719	39.6541	383.82	114.626	122.525	113.414	132.77	123.776	134.505	246.193	255.885	242.678	287.369	325.497	324.02	24.3729	39.3325	38.7612	46.4707	47.7528	49.6491	118.98
332	Q99700	ATXN2	Ataxin-2 OS=Homo sapiens OX=9606 GN=ATXN2 PE=1 SV=2					0	0	1	0	0	0	0	0	0	0	0	0	0	0	0	0	0	0	0	0	0	0	0	12.9421	12.8353	14.0722	15.1733	12.1217	10.924	0	0	0	0	0	0	0	0	0	0	0	0	0
333	Q8WWM7	ATXN2L	Ataxin-2-like protein OS=Homo sapiens OX=9606 GN=ATXN2L PE=1 SV=2					2	3	4	2	4	5	3	4	0	4	4	254.682	232.133	243.521	267.337	12.9068	248.697	104.187	102.395	101.264	104.98	113.535	112.395	482.084	471.521	432.231	498.188	462.823	489.796	77.4551	81.8164	73.4029	83.9547	78.0432	88.9064	261.422	233.971	244.949	238.962	240.508	227.477	587.043
334	Q96GX2	ATXN7L3B	Ataxin-7-like protein 3B OS=Homo sapiens OX=9606 GN=ATXN7L3B PE=1 SV=2					0	1	2	2	1	1	0	0	0	0	0	0	0	0	0	0	0	74.9043	66.142	63.971	80.7469	78.0256	73.0472	78.5296	69.0045	60.8915	83.5159	75.8021	85.9303	237.21	225.699	228.625	282.048	294.581	299.686	201.522	193.144	222.07	213.444	218.685	222.213	108.3
335	Q13825	AUH	Methylglutaconyl-CoA hydratase, mitochondrial OS=Homo sapiens OX=9606 GN=AUH PE=1 SV=1					1	0	0	0	0	0	0	0	0	0	0	89.0974	92.6726	89.0862	95.4014	130.121	80.2103	0	0	0	0	0	0	0	0	0	0	0	0	0	0	0	0	0	0	0	0	0	0	0	0	0
336	Q9Y679	AUP1	Ancient ubiquitous protein 1 OS=Homo sapiens OX=9606 GN=AUP1 PE=1 SV=2					0	2	2	1	3	2	2	2	1	1	2	0	0	0	0	0	0	215.388	224.047	202.877	249.982	86.3863	208.555	40.0377	36.9201	32.0315	43.6834	39.9447	48.99	80.616	69.387	71.2244	80.224	91.504	84.1401	163.601	172.259	186.037	194.075	192.609	193.59	167.925
337	Q96GD4	AURKB	Aurora kinase B OS=Homo sapiens OX=9606 GN=AURKB PE=1 SV=3				Kinase	0	0	0	0	0	0	0	1	0	0	0	0	0	0	0	0	0	0	0	0	0	0	0	0	0	0	0	0	0	0	0	0	0	0	0	0	0	0	0	0	0	0
338	O94766	B3GAT3	Galactosylgalactosylxylosylprotein 3-beta-glucuronosyltransferase 3 OS=Homo sapiens OX=9606 GN=B3GAT3 PE=1 SV=2					1	0	0	0	0	0	0	0	0	0	0	12.0318	18.3552	13.9863	16.7274	13.0638	13.2291	0	0	0	0	0	0	0	0	0	0	0	0	0	0	0	0	0	0	0	0	0	0	0	0	0
339	P15291	B4GALT1	Beta-1,4-galactosyltransferase 1 OS=Homo sapiens OX=9606 GN=B4GALT1 PE=1 SV=5					1	0	0	0	0	0	0	0	0	0	0	68.5956	75.295	73.0399	79.6424	37.8703	66.1183	0	0	0	0	0	0	0	0	0	0	0	0	0	0	0	0	0	0	0	0	0	0	0	0	0
340	O60512	B4GALT3	Beta-1,4-galactosyltransferase 3 OS=Homo sapiens OX=9606 GN=B4GALT3 PE=1 SV=2					2	0	0	0	0	0	0	0	0	0	0	48.4048	58.8684	50.8038	60.8128	80.8079	46.9586	0	0	0	0	0	0	0	0	0	0	0	0	0	0	0	0	0	0	0	0	0	0	0	0	0
341	Q9NWV8	BABAM1	BRISC and BRCA1-A complex member 1 OS=Homo sapiens OX=9606 GN=BABAM1 PE=1 SV=1					0	2	2	0	0	0	0	0	0	0	0	0	0	0	0	0	0	122.035	124.224	114.662	123.705	5.70345	129.624	150.036	126.916	139.006	142.6	166.963	165.78	0	0	0	0	0	0	0	0	0	0	0	0	0
342	Q9NXR7	BABAM2	BRISC and BRCA1-A complex member 2 OS=Homo sapiens OX=9606 GN=BABAM2 PE=1 SV=2					0	2	1	1	1	1	1	0	0	0	0	0	0	0	0	0	0	175.357	152.089	166.308	177.858	249.872	158.625	75.3855	72.4572	60.1468	72.9865	71.3052	59.5499	175.47	194.698	192.367	199.734	212.079	184.067	209.844	204.793	236.323	235.718	242.64	207.912	277.281
343	O95816	BAG2	BAG family molecular chaperone regulator 2 OS=Homo sapiens OX=9606 GN=BAG2 PE=1 SV=1					2	1	3	3	4	3	3	3	3	2	3	79.5618	95.1925	102.62	108.737	17.3649	84.3422	41.7894	38.7213	42.4306	46.2331	3.56673	40.511	327.18	290.243	243.295	396.534	348.293	398.416	182.769	155.008	141.372	215.346	190.474	224.7	216.346	202.796	193.895	278.952	264.689	290.021	284.497
344	O95817	BAG3	BAG family molecular chaperone regulator 3 OS=Homo sapiens OX=9606 GN=BAG3 PE=1 SV=3					4	0	0	0	0	0	0	0	0	0	0	231.623	211.327	201.53	233.544	199.89	213.888	0	0	0	0	0	0	0	0	0	0	0	0	0	0	0	0	0	0	0	0	0	0	0	0	0
345	O95429	BAG4	BAG family molecular chaperone regulator 4 OS=Homo sapiens OX=9606 GN=BAG4 PE=1 SV=1					2	0	0	0	0	0	0	0	0	0	0	237.383	222.949	227.739	241.304	306.951	216.168	0	0	0	0	0	0	0	0	0	0	0	0	0	0	0	0	0	0	0	0	0	0	0	0	0
346	P46379	BAG6	Large proline-rich protein BAG6 OS=Homo sapiens OX=9606 GN=BAG6 PE=1 SV=2					0	4	1	1	1	0	0	0	0	0	0	0	0	0	0	0	0	453.694	380.977	422.172	365.52	166.33	385.021	76.6602	67.8878	55.8015	72.6084	66.8541	83.1376	45.0205	42.8835	39.7271	35.9245	40.6721	52.8541	31.5413	34.7465	30.0143	29.1014	28.7648	34.2233	0
347	Q9UQB8	BAIAP2	Brain-specific angiogenesis inhibitor 1-associated protein 2 OS=Homo sapiens OX=9606 GN=BAIAP2 PE=1 SV=1					2	0	1	0	0	0	0	0	0	0	0	99.5631	94.8474	89.883	96.2143	58.6247	93.1333	0	0	0	0	0	0	52.4403	54.7992	41.8276	62.4461	48.0248	52.5942	0	0	0	0	0	0	0	0	0	0	0	0	0
348	Q9UHR4	BAIAP2L1	Brain-specific angiogenesis inhibitor 1-associated protein 2-like protein 1 OS=Homo sapiens OX=9606 GN=BAIAP2L1 PE=1 SV=2					0	3	1	0	0	0	0	0	0	0	0	0	0	0	0	0	0	187.454	179.861	174.666	184.795	239.176	192.398	130.993	120.404	124.337	136.056	125.297	139.469	0	0	0	0	0	0	0	0	0	0	0	0	0
349	O75531	BANF1	Barrier-to-autointegration factor OS=Homo sapiens OX=9606 GN=BANF1 PE=1 SV=1					4	0	0	0	0	0	0	0	0	0	0	210.954	286.497	288.648	249.999	578.686	232.781	0	0	0	0	0	0	0	0	0	0	0	0	0	0	0	0	0	0	0	0	0	0	0	0	0
350	Q92560	BAP1	Ubiquitin carboxyl-terminal hydrolase BAP1 OS=Homo sapiens OX=9606 GN=BAP1 PE=1 SV=2			DUB		0	0	0	0	0	0	0	0	1	0	0	0	0	0	0	0	0	0	0	0	0	0	0	0	0	0	0	0	0	0	0	0	0	0	0	0	0	0	0	0	0	0
351	Q9NRL2	BAZ1A	Bromodomain adjacent to zinc finger domain protein 1A OS=Homo sapiens OX=9606 GN=BAZ1A PE=1 SV=2			E3 ligase		0	0	1	3	1	2	2	3	0	3	2	0	0	0	0	0	0	0	0	0	0	0	0	24.4216	23.2512	20.2605	26.934	27.2419	27.2287	232.564	256.06	243.842	275.431	246.99	259.861	85.6697	81.1988	87.8558	71.4594	76.0322	81.8131	320.712
352	Q9UIG0	BAZ1B	Tyrosine-protein kinase BAZ1B OS=Homo sapiens OX=9606 GN=BAZ1B PE=1 SV=2			E3 ligase		0	0	0	0	1	1	1	2	3	1	0	0	0	0	0	0	0	0	0	0	0	0	0	0	0	0	0	0	0	0	0	0	0	0	0	23.0206	22.1426	25.8255	17.6207	18.2758	18.739	57.5143
353	Q9UIF9	BAZ2A	Bromodomain adjacent to zinc finger domain protein 2A OS=Homo sapiens OX=9606 GN=BAZ2A PE=1 SV=4					0	0	0	1	1	1	1	2	2	1	2	0	0	0	0	0	0	0	0	0	0	0	0	0	0	0	0	0	0	113.427	95.1736	114.207	95.7181	121.263	90.106	140.464	144.16	155.176	110.872	129.59	114.237	185.529
354	Q8WY36	BBX	HMG box transcription factor BBX OS=Homo sapiens OX=9606 GN=BBX PE=1 SV=1					0	0	0	0	0	0	0	1	2	1	0	0	0	0	0	0	0	0	0	0	0	0	0	0	0	0	0	0	0	0	0	0	0	0	0	0	0	0	0	0	0	0
355	P51572	BCAP31	B-cell receptor-associated protein 31 OS=Homo sapiens OX=9606 GN=BCAP31 PE=1 SV=3					1	3	4	2	3	2	1	1	1	2	1	29.6788	52.6855	54.9145	32.1688	54.9487	35.5444	468.01	518.306	401.013	592.913	384.114	516.487	724.442	609.63	492.441	739.108	794.109	784.326	232.692	185.245	213.762	217.079	266.461	298.818	214.826	217.457	232.003	238.053	225.236	255.457	298.34
356	O75934	BCAS2	Pre-mRNA-splicing factor SPF27 OS=Homo sapiens OX=9606 GN=BCAS2 PE=1 SV=1					0	0	2	2	2	2	2	4	1	3	3	0	0	0	0	0	0	0	0	0	0	0	0	116.393	107.827	111.032	134.416	130.414	173.672	145.513	123.704	146.603	167.392	150.996	179.722	269.587	207.84	236.188	232.942	248.23	257.126	341.503
357	Q9H6U6	BCAS3	Breast carcinoma-amplified sequence 3 OS=Homo sapiens OX=9606 GN=BCAS3 PE=1 SV=3					0	0	1	0	0	0	0	0	0	0	0	0	0	0	0	0	0	0	0	0	0	0	0	122.215	109.656	107.143	103.453	116.742	85.665	0	0	0	0	0	0	0	0	0	0	0	0	0
358	O15382	BCAT2	Branched-chain-amino-acid aminotransferase, mitochondrial OS=Homo sapiens OX=9606 GN=BCAT2 PE=1 SV=2					1	0	0	0	0	0	0	0	0	0	0	25.0341	24.555	22.4303	22.2678	14.3066	23.7042	0	0	0	0	0	0	0	0	0	0	0	0	0	0	0	0	0	0	0	0	0	0	0	0	0
359	Q9P287	BCCIP	BRCA2 and CDKN1A-interacting protein OS=Homo sapiens OX=9606 GN=BCCIP PE=1 SV=1					4	4	4	4	1	1	0	1	0	0	0	142.118	148.551	154.716	170.208	211.232	139.943	185.641	177.246	191.58	182.934	156.95	188.155	154.208	115.486	241.838	173.587	165.344	149.831	147.357	120.365	173.421	155.713	172.944	141.573	42.0869	39.5759	67.0361	48.7666	54.9124	37.0712	46.5692
360	P06276	BCHE	Cholinesterase OS=Homo sapiens OX=9606 GN=BCHE PE=1 SV=1					0	0	0	0	0	1	0	1	0	0	0	0	0	0	0	0	0	0	0	0	0	0	0	0	0	0	0	0	0	0	0	0	0	0	0	0	0	0	0	0	0	60.7956
361	O95999	BCL10	B-cell lymphoma/leukemia 10 OS=Homo sapiens OX=9606 GN=BCL10 PE=1 SV=1					1	0	0	0	0	0	0	0	0	0	0	38.2311	33.5374	32.7018	43.8108	38.1203	34.0386	0	0	0	0	0	0	0	0	0	0	0	0	0	0	0	0	0	0	0	0	0	0	0	0	0
362	Q9BXK5	BCL2L13	Bcl-2-like protein 13 OS=Homo sapiens OX=9606 GN=BCL2L13 PE=1 SV=1					1	0	0	0	0	0	0	0	0	0	0	22.5762	24.6773	21.1933	21.4904	27.7447	21.0223	0	0	0	0	0	0	0	0	0	0	0	0	0	0	0	0	0	0	0	0	0	0	0	0	0
363	Q9BQE9	BCL7B	B-cell CLL/lymphoma 7 protein family member B OS=Homo sapiens OX=9606 GN=BCL7B PE=1 SV=1					0	2	0	0	1	0	0	0	0	0	0	0	0	0	0	0	0	89.232	86.7793	86.9601	100.66	123.996	75.5496	0	0	0	0	0	0	0	0	0	0	0	0	72.0782	69.6404	70.6673	51.733	64.1693	57.9628	0
364	Q8WUZ0	BCL7C	B-cell CLL/lymphoma 7 protein family member C OS=Homo sapiens OX=9606 GN=BCL7C PE=1 SV=3					0	1	2	2	3	1	0	0	0	0	0	0	0	0	0	0	0	34.859	35.9245	33.562	35.638	0	32.3246	133.697	114.405	129.626	122.404	141.379	140.923	153.8	143.938	131.079	130.624	141.66	124.889	242.556	217.622	211.198	167.413	190.834	169.914	28.577
365	Q9NYF8	BCLAF1	Bcl-2-associated transcription factor 1 OS=Homo sapiens OX=9606 GN=BCLAF1 PE=1 SV=2					0	0	0	0	0	0	0	0	2	1	1	0	0	0	0	0	0	0	0	0	0	0	0	0	0	0	0	0	0	0	0	0	0	0	0	0	0	0	0	0	0	0
366	P11274	BCR	Breakpoint cluster region protein OS=Homo sapiens OX=9606 GN=BCR PE=1 SV=2					0	0	1	0	0	0	0	0	0	0	0	0	0	0	0	0	0	0	0	0	0	0	0	169.811	148.681	148.19	185.077	184.719	173.776	0	0	0	0	0	0	0	0	0	0	0	0	0
367	Q9Y276	BCS1L	Mitochondrial chaperone BCS1 OS=Homo sapiens OX=9606 GN=BCS1L PE=1 SV=1					0	2	0	0	0	0	0	0	0	0	0	0	0	0	0	0	0	141.92	149.797	152.403	169.424	56.2826	161.13	0	0	0	0	0	0	0	0	0	0	0	0	0	0	0	0	0	0	0
368	Q02338	BDH1	D-beta-hydroxybutyrate dehydrogenase, mitochondrial OS=Homo sapiens OX=9606 GN=BDH1 PE=1 SV=3					2	2	2	0	0	0	0	0	0	0	0	79.6962	72.8027	66.1771	92.9636	117.725	83.4808	68.1058	71.9247	63.2303	74.1797	104.823	67.0898	57.8339	43.2441	47.6736	47.8815	43.3252	46.6113	0	0	0	0	0	0	0	0	0	0	0	0	0
369	Q14457	BECN1	Beclin-1 OS=Homo sapiens OX=9606 GN=BECN1 PE=1 SV=2					0	1	0	0	0	0	0	0	0	0	0	0	0	0	0	0	0	16.9492	16.2484	18.8729	19.4954	21.8119	15.7272	0	0	0	0	0	0	0	0	0	0	0	0	0	0	0	0	0	0	0
370	Q5T5X7	BEND3	BEN domain-containing protein 3 OS=Homo sapiens OX=9606 GN=BEND3 PE=1 SV=1					0	0	1	1	0	3	2	2	4	1	1	0	0	0	0	0	0	0	0	0	0	0	0	22.9404	18.716	18.8655	23.0905	17.7048	13.8302	101.191	103.985	109.135	129.201	128.617	113.366	0	0	0	0	0	0	421.578
371	Q8TD16	BICD2	Protein bicaudal D homolog 2 OS=Homo sapiens OX=9606 GN=BICD2 PE=1 SV=1					1	0	0	0	0	0	0	0	0	0	0	15.098	12.5839	15.623	12.7874	7.13178	12.6851	0	0	0	0	0	0	0	0	0	0	0	0	0	0	0	0	0	0	0	0	0	0	0	0	0
372	P55957	BID	BH3-interacting domain death agonist OS=Homo sapiens OX=9606 GN=BID PE=1 SV=1					3	0	1	0	0	0	0	0	0	0	0	211.766	353.305	383.482	273.584	19.8673	315.943	0	0	0	0	0	0	10.8422	13.1592	10.7835	15.8961	14.8103	14.3211	0	0	0	0	0	0	0	0	0	0	0	0	0
373	Q9NQY0	BIN3	Bridging integrator 3 OS=Homo sapiens OX=9606 GN=BIN3 PE=1 SV=1					1	0	0	0	0	0	0	0	0	0	0	26.3308	24.5521	28.8404	30.2391	5.9704	29.8924	0	0	0	0	0	0	0	0	0	0	0	0	0	0	0	0	0	0	0	0	0	0	0	0	0
374	Q9NR09	BIRC6	Baculoviral IAP repeat-containing protein 6 OS=Homo sapiens OX=9606 GN=BIRC6 PE=1 SV=2					0	3	4	2	3	0	0	1	0	1	2	0	0	0	0	0	0	283.019	248.337	289.846	296.069	478.398	208.08	192.579	171.688	177.367	219.928	184.134	200.22	344.026	323.851	371.271	452.16	417.269	419.747	480.342	456.868	570.982	634.787	597.474	582.489	0
375	P54132	BLM	Bloom syndrome protein OS=Homo sapiens OX=9606 GN=BLM PE=1 SV=1					0	0	0	0	0	0	2	1	2	1	2	0	0	0	0	0	0	0	0	0	0	0	0	0	0	0	0	0	0	0	0	0	0	0	0	0	0	0	0	0	0	0
376	Q13867	BLMH	Bleomycin hydrolase OS=Homo sapiens OX=9606 GN=BLMH PE=1 SV=1					3	2	1	0	0	0	0	0	0	0	0	80.0721	98.9821	107.303	112.508	73.4095	73.3421	125.754	119.689	114.318	137.244	48.4136	168.981	11.7665	13.6579	13.4393	14.4268	16.3838	13.6579	0	0	0	0	0	0	0	0	0	0	0	0	0
377	Q6QNY1	BLOC1S2	Biogenesis of lysosome-related organelles complex 1 subunit 2 OS=Homo sapiens OX=9606 GN=BLOC1S2 PE=1 SV=1					1	0	0	0	0	0	0	0	0	0	0	36.1501	55.6871	57.2674	43.7218	61.872	53.86	0	0	0	0	0	0	0	0	0	0	0	0	0	0	0	0	0	0	0	0	0	0	0	0	0
378	P53004	BLVRA	Biliverdin reductase A OS=Homo sapiens OX=9606 GN=BLVRA PE=1 SV=2					1	0	3	2	0	2	2	1	0	1	0	14.4315	13.7699	8.31615	15.5737	23.1282	13.4872	0	0	0	0	0	0	64.0681	56.342	54.0438	60.007	58.3119	63.8617	41.2359	44.103	42.0482	48.2056	50.9915	51.4746	0	0	0	0	0	0	87.295
379	P30043	BLVRB	Flavin reductase (NADPH) OS=Homo sapiens OX=9606 GN=BLVRB PE=1 SV=3					2	0	0	0	0	0	0	0	0	0	0	32.2578	32.7346	35.2212	38.2401	0	39.3319	0	0	0	0	0	0	0	0	0	0	0	0	0	0	0	0	0	0	0	0	0	0	0	0	0
380	Q9NSY1	BMP2K	BMP-2-inducible protein kinase OS=Homo sapiens OX=9606 GN=BMP2K PE=1 SV=2				Kinase	0	0	0	2	2	1	1	1	1	2	1	0	0	0	0	0	0	0	0	0	0	0	0	0	0	0	0	0	0	95.1118	91.696	91.1408	130.171	111.119	109.337	90.4536	80.8578	95.6404	100.415	89.3272	92.7702	55.1668
381	Q14692	BMS1	Ribosome biogenesis protein BMS1 homolog OS=Homo sapiens OX=9606 GN=BMS1 PE=1 SV=1					0	0	2	2	2	2	0	3	1	1	2	0	0	0	0	0	0	0	0	0	0	0	0	154.712	152.61	156.661	146.479	144.999	138.03	217.035	198.689	199.866	195.439	157.581	158.906	53.8007	50.325	49.8329	36.3981	35.2064	36.9304	80.5795
382	Q9H3K6	BOLA2	BolA-like protein 2 OS=Homo sapiens OX=9606 GN=BOLA2 PE=1 SV=1					2	0	0	0	0	0	0	0	0	0	0	100.479	108.595	108.604	109.424	31.9815	106.816	0	0	0	0	0	0	0	0	0	0	0	0	0	0	0	0	0	0	0	0	0	0	0	0	0
383	Q14137	BOP1	Ribosome biogenesis protein BOP1 OS=Homo sapiens OX=9606 GN=BOP1 PE=1 SV=2					1	3	0	1	2	1	0	0	2	1	0	199.317	198.212	184.006	212.327	23.8801	183.398	90.2214	88.6376	84.0903	83.6975	36.4865	96.4474	0	0	0	0	0	0	20.7842	23.2976	17.148	18.3993	24.0942	16.3398	42.8929	42.7972	45.8246	42.581	34.7472	38.2335	19.1309
384	Q86WA6	BPHL	Valacyclovir hydrolase OS=Homo sapiens OX=9606 GN=BPHL PE=1 SV=1					0	0	0	0	0	0	0	1	0	0	0	0	0	0	0	0	0	0	0	0	0	0	0	0	0	0	0	0	0	0	0	0	0	0	0	0	0	0	0	0	0	0
385	O95861	BPNT1	3'(2'),5'-bisphosphate nucleotidase 1 OS=Homo sapiens OX=9606 GN=BPNT1 PE=1 SV=1					2	1	0	0	0	0	0	0	0	0	0	289.983	277.225	265.541	283	337.432	283.036	54.0241	52.5681	51.1251	58.011	78.2322	53.2368	0	0	0	0	0	0	0	0	0	0	0	0	0	0	0	0	0	0	0
386	Q7Z569	BRAP	BRCA1-associated protein OS=Homo sapiens OX=9606 GN=BRAP PE=1 SV=2			E3 ligase		1	0	0	0	0	0	0	0	0	0	0	24.691	24.0406	23.4272	27.9054	36.8133	26.0747	0	0	0	0	0	0	0	0	0	0	0	0	0	0	0	0	0	0	0	0	0	0	0	0	0
387	Q6PJG6	BRAT1	BRCA1-associated ATM activator 1 OS=Homo sapiens OX=9606 GN=BRAT1 PE=1 SV=2					3	1	1	0	0	2	1	0	0	0	0	78.3136	81.9805	77.462	99.6029	62.871	77.3702	55.6199	56.0236	53.8617	58.2439	10.9232	53.6884	164.306	148.208	162.59	162.494	175.093	163.216	0	0	0	0	0	0	0	0	0	0	0	0	68.0673
388	P46736	BRCC3	Lys-63-specific deubiquitinase BRCC36 OS=Homo sapiens OX=9606 GN=BRCC3 PE=1 SV=2			DUB		0	1	2	0	0	1	0	0	0	0	0	0	0	0	0	0	0	49.4903	51.3759	50.9315	50.8357	26.6931	54.4108	201.612	188.29	273.353	378.389	286.515	228.687	0	0	0	0	0	0	0	0	0	0	0	0	67.2537
389	O95696	BRD1	Bromodomain-containing protein 1 OS=Homo sapiens OX=9606 GN=BRD1 PE=1 SV=1					0	0	0	0	0	0	0	0	1	1	1	0	0	0	0	0	0	0	0	0	0	0	0	0	0	0	0	0	0	0	0	0	0	0	0	0	0	0	0	0	0	0
390	P25440	BRD2	Bromodomain-containing protein 2 OS=Homo sapiens OX=9606 GN=BRD2 PE=1 SV=2					0	0	0	0	0	0	0	0	0	1	3	0	0	0	0	0	0	0	0	0	0	0	0	0	0	0	0	0	0	0	0	0	0	0	0	0	0	0	0	0	0	0
391	Q9NPI1	BRD7	Bromodomain-containing protein 7 OS=Homo sapiens OX=9606 GN=BRD7 PE=1 SV=1					0	0	0	2	1	2	0	2	0	1	0	0	0	0	0	0	0	0	0	0	0	0	0	0	0	0	0	0	0	77.0064	66.003	71.1315	58.0964	61.0255	57.2871	48.7756	45.7341	41.0771	26.1334	25.6376	27.1815	150.228
392	Q9H0E9	BRD8	Bromodomain-containing protein 8 OS=Homo sapiens OX=9606 GN=BRD8 PE=1 SV=2					0	0	2	2	1	1	0	0	0	0	0	0	0	0	0	0	0	0	0	0	0	0	0	112.258	104.334	91.8297	115.851	120.292	113.374	110.077	120.427	112.261	142.602	131.88	117.248	48.8973	46.183	51.7551	47.0571	47.4122	48.3928	47.5038
393	Q9H8M2	BRD9	Bromodomain-containing protein 9 OS=Homo sapiens OX=9606 GN=BRD9 PE=1 SV=2					0	1	0	0	0	0	1	2	0	0	0	0	0	0	0	0	0	328.918	253.27	233.355	317.175	245.584	324.363	0	0	0	0	0	0	0	0	0	0	0	0	0	0	0	0	0	0	0
394	Q92994	BRF1	Transcription factor IIIB 90 kDa subunit OS=Homo sapiens OX=9606 GN=BRF1 PE=1 SV=1					0	0	0	1	0	0	0	0	0	0	0	0	0	0	0	0	0	0	0	0	0	0	0	0	0	0	0	0	0	32.2045	27.8177	27.9957	32.5834	34.6211	39.9797	0	0	0	0	0	0	0
395	Q8WY22	BRI3BP	BRI3-binding protein OS=Homo sapiens OX=9606 GN=BRI3BP PE=1 SV=1					0	1	2	0	0	0	1	0	0	0	1	0	0	0	0	0	0	43.1599	45.3428	47.0834	46.71	2.84365	41.2419	122.275	123.839	97.3824	152.062	119.709	182.828	0	0	0	0	0	0	0	0	0	0	0	0	0
396	Q8TDN6	BRIX1	Ribosome biogenesis protein BRX1 homolog OS=Homo sapiens OX=9606 GN=BRIX1 PE=1 SV=2					0	0	1	2	3	2	2	5	4	4	3	0	0	0	0	0	0	0	0	0	0	0	0	33.4828	25.5565	29.6618	34.0916	26.1807	32.7747	285.164	312.969	245.508	180.909	168.946	176.674	517.665	494.663	494.408	358.837	321.673	345.991	437.092
397	Q8WUW1	BRK1	Protein BRICK1 OS=Homo sapiens OX=9606 GN=BRK1 PE=1 SV=1					1	0	0	0	0	0	0	0	0	0	0	160.568	258.614	234.197	165.448	28.9112	195.549	0	0	0	0	0	0	0	0	0	0	0	0	0	0	0	0	0	0	0	0	0	0	0	0	0
398	Q5VW32	BROX	BRO1 domain-containing protein BROX OS=Homo sapiens OX=9606 GN=BROX PE=1 SV=1					1	0	0	0	0	0	0	0	0	0	0	14.6327	14.5329	16.5992	15.5218	18.577	13.5506	0	0	0	0	0	0	0	0	0	0	0	0	0	0	0	0	0	0	0	0	0	0	0	0	0
399	Q9ULD4	BRPF3	Bromodomain and PHD finger-containing protein 3 OS=Homo sapiens OX=9606 GN=BRPF3 PE=1 SV=2					0	0	0	0	0	1	0	0	0	1	1	0	0	0	0	0	0	0	0	0	0	0	0	0	0	0	0	0	0	0	0	0	0	0	0	0	0	0	0	0	0	85.2249
400	P35613	BSG	Basigin OS=Homo sapiens OX=9606 GN=BSG PE=1 SV=2					3	4	3	3	3	2	4	3	2	0	3	150.288	151.782	147.487	153.93	13.071	123.166	375.958	362.687	370.324	376.048	325.113	409.039	251.195	209.416	212.753	260.321	232.639	318.247	246.549	221.433	216.708	322.773	255.566	356.16	404.797	348.103	373.903	496.746	392.445	511.925	268.714
401	O14981	BTAF1	TATA-binding protein-associated factor 172 OS=Homo sapiens OX=9606 GN=BTAF1 PE=1 SV=2					0	2	1	3	3	3	3	4	1	1	2	0	0	0	0	0	0	303.334	294.336	291.941	321.018	130.318	305.423	398.002	319.06	328.255	431.906	354.912	343.126	265.856	257.911	262.409	337.147	313.702	317.247	742.556	685.898	809.827	931.518	803.715	827.852	284.215
402	Q9BSF8	BTBD10	BTB/POZ domain-containing protein 10 OS=Homo sapiens OX=9606 GN=BTBD10 PE=1 SV=2					0	0	0	0	0	0	0	0	1	0	0	0	0	0	0	0	0	0	0	0	0	0	0	0	0	0	0	0	0	0	0	0	0	0	0	0	0	0	0	0	0	0
403	P20290	BTF3	Transcription factor BTF3 OS=Homo sapiens OX=9606 GN=BTF3 PE=1 SV=1					4	1	3	5	5	4	1	3	3	2	3	168.897	190.148	206.437	198.104	197.312	150.478	71.7159	76.0562	108.81	123.426	163.289	101.564	798.728	550.138	567.644	646.224	600.161	575.26	1229.42	875.711	1052.64	718.636	597.795	585.23	1235.05	1084.67	815.726	1121.25	993.707	990.274	599.062
404	Q96K17	BTF3L4	Transcription factor BTF3 homolog 4 OS=Homo sapiens OX=9606 GN=BTF3L4 PE=1 SV=1					2	0	3	5	3	3	1	0	0	0	0	94.8256	97.3844	109.92	93.887	98.3907	78.0663	0	0	0	0	0	0	209.874	199.638	189.627	203.408	226.68	204.965	618.653	589.853	525.819	435.789	415.496	429.057	260.491	281.088	214.69	301.101	292.286	297.683	126.723
405	Q9Y297	BTRC	F-box/WD repeat-containing protein 1A OS=Homo sapiens OX=9606 GN=BTRC PE=1 SV=1					0	1	1	2	2	2	2	0	1	1	1	0	0	0	0	0	0	45.3195	46.0179	42.856	52.8606	13.0802	43.0201	32.48	27.4338	27.0378	35.403	29.3144	31.0921	61.3417	61.764	61.8339	77.659	68.1343	75.3173	96.7394	121.106	125.226	134.674	124.775	122.373	121.714
406	O43683	BUB1	Mitotic checkpoint serine/threonine-protein kinase BUB1 OS=Homo sapiens OX=9606 GN=BUB1 PE=1 SV=1				Kinase	0	1	2	1	1	0	1	0	0	0	0	0	0	0	0	0	0	123.478	111.321	99.0235	114.366	126.102	99.2254	212.386	173.666	226.404	218.494	198.321	195.67	90.9441	78.6891	91.2906	94.9506	93.136	86.1352	108.968	113.99	121.201	91.3574	100.659	95.0547	0
407	O60566	BUB1B	Mitotic checkpoint serine/threonine-protein kinase BUB1 beta OS=Homo sapiens OX=9606 GN=BUB1B PE=1 SV=3				Kinase	1	4	3	4	1	4	2	2	3	2	1	58.4996	55.8834	56.5644	67.2432	72.5028	56.2562	251.971	229.963	222.628	233.643	179.02	244.799	379.583	340.139	376.811	393.208	390.898	357.085	274.75	266.817	284.395	330.92	331.041	299.487	94.5313	87.5835	107.84	105.089	102.761	99.0518	301.903
408	O43684	BUB3	Mitotic checkpoint protein BUB3 OS=Homo sapiens OX=9606 GN=BUB3 PE=1 SV=1					0	4	3	4	3	2	3	3	4	5	3	0	0	0	0	0	0	157.756	148.025	150.565	169.433	25.8316	153.163	103.195	99.6685	89.1991	100.559	109.503	95.9626	137.821	155.058	151.668	172.904	162.287	153.176	146.67	172.443	177.669	177.822	185.048	184.556	179.107
409	O43709	BUD23	Probable 18S rRNA (guanine-N(7))-methyltransferase OS=Homo sapiens OX=9606 GN=BUD23 PE=1 SV=2					2	0	1	1	1	1	1	0	0	0	0	58.7387	56.0988	54.2234	70.5364	8.8382	63.0362	0	0	0	0	0	0	19.8818	23.2508	19.2465	23.5078	19.6598	18.4018	19.3626	24.9417	20.5035	19.4926	19.2304	19.1586	86.423	101.449	118.822	116.63	103.495	99.307	101.081
410	P41223	BUD31	Protein BUD31 homolog OS=Homo sapiens OX=9606 GN=BUD31 PE=1 SV=2					3	1	3	2	0	1	0	1	1	0	0	140.982	130.282	139.794	155.267	84.5466	135.626	83.2079	96.1079	101.256	82.6078	139.986	76.0637	169.363	181.01	186.355	165.576	187.296	148.419	100.128	109.311	119.664	96.8693	126.302	100.517	0	0	0	0	0	0	68.9683
411	Q13895	BYSL	Bystin OS=Homo sapiens OX=9606 GN=BYSL PE=1 SV=3					0	1	3	3	4	4	2	3	3	2	1	0	0	0	0	0	0	13.3338	14.3865	22.1058	18.8714	5.36567	11.5986	282.749	223.344	279.744	314.754	259.495	239.899	217.822	191.083	233.207	295.948	267.667	254.361	367.711	365.232	378.913	465.679	471.099	457.891	246.031
412	Q7L1Q6	BZW1	Basic leucine zipper and W2 domain-containing protein 1 OS=Homo sapiens OX=9606 GN=BZW1 PE=1 SV=1					3	2	3	0	2	1	1	1	0	0	0	163.399	162.581	147.016	162.683	158.212	151.676	147.868	141.057	145.897	170.726	218.843	161.074	199.719	215.982	198.571	240.704	233.64	223.363	0	0	0	0	0	0	285.307	332.212	346.747	396.713	375.856	356.937	20.4733
413	Q9Y6E2	BZW2	Basic leucine zipper and W2 domain-containing protein 2 OS=Homo sapiens OX=9606 GN=BZW2 PE=1 SV=1					4	2	1	0	1	0	0	0	0	0	0	333.117	365.215	343.538	365.933	319.101	349.255	76.4809	96.6594	81.6334	93.0159	27.3671	90.1329	86.7119	90.937	83.4257	92.5325	83.3021	91.5139	0	0	0	0	0	0	18.2852	21.8205	24.0904	22.3652	20.8242	22.2092	0
414	Q9H8K7	C10orf88	Uncharacterized protein C10orf88 OS=Homo sapiens OX=9606 GN=C10orf88 PE=1 SV=2					0	0	1	0	0	0	0	1	2	2	0	0	0	0	0	0	0	0	0	0	0	0	0	22.2324	19.9096	17.8815	21.0024	19.1402	16.7021	0	0	0	0	0	0	0	0	0	0	0	0	0
415	E9PRG8	C11orf98	Uncharacterized protein C11orf98 OS=Homo sapiens OX=9606 GN=C11orf98 PE=4 SV=1					0	0	0	2	2	2	0	2	1	1	1	0	0	0	0	0	0	0	0	0	0	0	0	0	0	0	0	0	0	157.628	133.536	150.609	80.0517	81.0875	86.5319	173.721	178.581	182.632	115.198	107.18	105.679	402.254
416	Q9HB07	C12orf10	UPF0160 protein MYG1, mitochondrial OS=Homo sapiens OX=9606 GN=C12orf10 PE=1 SV=2					0	1	0	0	0	0	0	0	0	0	0	0	0	0	0	0	0	51.5703	55.1986	51.2213	50.7924	20.3608	62.6572	0	0	0	0	0	0	0	0	0	0	0	0	0	0	0	0	0	0	0
417	Q99622	C12orf57	Protein C10 OS=Homo sapiens OX=9606 GN=C12orf57 PE=1 SV=1					2	0	0	0	0	0	0	0	0	0	0	71.22	113.852	119.799	89.1701	81.9274	104.758	0	0	0	0	0	0	0	0	0	0	0	0	0	0	0	0	0	0	0	0	0	0	0	0	0
418	Q7Z3J2	C16orf62	UPF0505 protein C16orf62 OS=Homo sapiens OX=9606 GN=C16orf62 PE=1 SV=2					0	0	1	0	0	0	0	0	0	0	0	0	0	0	0	0	0	0	0	0	0	0	0	56.0506	50.4354	49.8434	52.0521	54.0432	42.7128	0	0	0	0	0	0	0	0	0	0	0	0	0
419	Q9HAS0	C17orf75	Protein Njmu-R1 OS=Homo sapiens OX=9606 GN=C17orf75 PE=1 SV=2					0	1	1	0	1	0	0	1	0	0	0	0	0	0	0	0	0	91.0609	79.1756	78.1404	85.0777	113.497	91.6374	151.631	143.74	118.409	129.219	122.23	137.477	0	0	0	0	0	0	122.957	125.885	122.128	126.778	134.671	151.976	0
420	Q9UFG5	C19orf25	UPF0449 protein C19orf25 OS=Homo sapiens OX=9606 GN=C19orf25 PE=1 SV=2					0	0	2	1	0	1	0	0	1	0	0	0	0	0	0	0	0	0	0	0	0	0	0	31.4944	26.816	23.4594	35.8598	37.3034	34.8987	62.8885	60.0121	64.9842	62.1363	71.7256	70.5324	0	0	0	0	0	0	51.4716
421	Q9UNZ5	C19orf53	Leydig cell tumor 10 kDa protein homolog OS=Homo sapiens OX=9606 GN=C19orf53 PE=1 SV=1					0	0	0	2	0	1	0	1	0	0	0	0	0	0	0	0	0	0	0	0	0	0	0	0	0	0	0	0	0	341.971	256.206	281.359	233.047	200.417	248.418	0	0	0	0	0	0	427.731
422	Q8N6N3	C1orf52	UPF0690 protein C1orf52 OS=Homo sapiens OX=9606 GN=C1orf52 PE=1 SV=1					1	0	0	0	0	0	0	0	0	0	0	63.3236	59.3681	65.3317	61.8812	78.2826	59.8837	0	0	0	0	0	0	0	0	0	0	0	0	0	0	0	0	0	0	0	0	0	0	0	0	0
423	Q07021	C1QBP	Complement component 1 Q subcomponent-binding protein, mitochondrial OS=Homo sapiens OX=9606 GN=C1QBP PE=1 SV=1					2	2	3	3	5	3	2	4	4	4	1	60.0787	55.7148	61.5093	64.5002	106.352	59.5959	119.501	116.675	113.395	110.733	14.2665	144.746	171.899	168.271	182.632	173.962	212.686	186.613	175.418	175.758	189.181	181.33	205.958	199.623	239.957	266.79	308.584	241.292	294.441	268.679	214.185
424	Q9GZN8	C20orf27	UPF0687 protein C20orf27 OS=Homo sapiens OX=9606 GN=C20orf27 PE=1 SV=3					2	0	0	0	0	0	0	0	0	0	0	101.347	112.759	105.694	121.993	136.609	112.231	0	0	0	0	0	0	0	0	0	0	0	0	0	0	0	0	0	0	0	0	0	0	0	0	0
425	Q9NWW7	C2orf42	Uncharacterized protein C2orf42 OS=Homo sapiens OX=9606 GN=C2orf42 PE=1 SV=1					0	0	0	0	0	0	1	0	0	0	0	0	0	0	0	0	0	0	0	0	0	0	0	0	0	0	0	0	0	0	0	0	0	0	0	0	0	0	0	0	0	0
426	Q9BVC5	C2orf49	Ashwin OS=Homo sapiens OX=9606 GN=C2orf49 PE=1 SV=1					0	1	1	0	2	0	0	0	0	0	0	0	0	0	0	0	0	75.3243	67.6342	83.5346	87.2046	100.646	98.8631	50.6069	41.8871	42.5737	59.0048	45.5179	59.611	0	0	0	0	0	0	159.553	126.718	146.289	184.434	149.012	167.363	0
427	P01024	C3	Complement C3 OS=Homo sapiens OX=9606 GN=C3 PE=1 SV=2					2	1	0	0	0	0	0	0	0	0	0	161.72	149.7	109.924	153.583	112.187	129.69	35.0416	36.257	26.0539	36.2299	21.1584	36.9484	0	0	0	0	0	0	0	0	0	0	0	0	0	0	0	0	0	0	0
428	P0C0L5	C4B	Complement C4-B OS=Homo sapiens OX=9606 GN=C4B PE=1 SV=2					1	1	1	0	0	0	1	0	1	1	0	43.6133	37.7449	28.885	52.6582	34.2966	36.9124	40.7755	46.1601	43.8047	54.07	90.4368	51.1168	167.421	133.972	107.498	148.039	137.285	141.687	0	0	0	0	0	0	0	0	0	0	0	0	0
429	Q49AR2	C5orf22	UPF0489 protein C5orf22 OS=Homo sapiens OX=9606 GN=C5orf22 PE=1 SV=2					3	0	0	0	0	0	0	0	0	0	0	194.458	183.067	169.15	186.418	217.204	174.739	0	0	0	0	0	0	0	0	0	0	0	0	0	0	0	0	0	0	0	0	0	0	0	0	0
430	Q7Z4R8	C6orf120	UPF0669 protein C6orf120 OS=Homo sapiens OX=9606 GN=C6orf120 PE=1 SV=1					0	0	0	0	0	0	0	1	2	2	2	0	0	0	0	0	0	0	0	0	0	0	0	0	0	0	0	0	0	0	0	0	0	0	0	0	0	0	0	0	0	0
431	Q8WVR3	C7orf43	Uncharacterized protein C7orf43 OS=Homo sapiens OX=9606 GN=C7orf43 PE=1 SV=2					0	0	0	0	0	0	0	0	1	0	0	0	0	0	0	0	0	0	0	0	0	0	0	0	0	0	0	0	0	0	0	0	0	0	0	0	0	0	0	0	0	0
432	Q9BRJ6	C7orf50	Uncharacterized protein C7orf50 OS=Homo sapiens OX=9606 GN=C7orf50 PE=1 SV=1					0	0	0	2	1	3	3	1	3	2	3	0	0	0	0	0	0	0	0	0	0	0	0	0	0	0	0	0	0	138.983	115.807	111.905	63.1481	73.8784	61.4858	72.7474	68.6586	73.084	48.1419	48.9188	47.5202	467.418
433	Q9H7E9	C8orf33	UPF0488 protein C8orf33 OS=Homo sapiens OX=9606 GN=C8orf33 PE=1 SV=1					0	0	0	0	2	2	2	2	2	2	2	0	0	0	0	0	0	0	0	0	0	0	0	0	0	0	0	0	0	0	0	0	0	0	0	138.857	124.887	129.895	126.982	127.593	122.842	96.952
434	Q6P1X6	C8orf82	UPF0598 protein C8orf82 OS=Homo sapiens OX=9606 GN=C8orf82 PE=1 SV=2					0	1	1	3	2	2	1	0	1	1	0	0	0	0	0	0	0	221.151	206.882	206.378	256.044	53.3563	226.339	51.458	50.7019	39.8992	57.2592	49.7981	50.8062	220.193	229.199	230.39	273.856	271.423	263.455	191.58	210.589	229.411	269.721	260.574	252.657	146.136
435	Q9NZ63	C9orf78	Telomere length and silencing protein 1 homolog OS=Homo sapiens OX=9606 GN=C9orf78 PE=1 SV=1					1	0	0	0	0	0	0	0	0	0	0	38.3125	38.323	39.4842	41.519	52.6367	36.6704	0	0	0	0	0	0	0	0	0	0	0	0	0	0	0	0	0	0	0	0	0	0	0	0	0
436	P00918	CA2	Carbonic anhydrase 2 OS=Homo sapiens OX=9606 GN=CA2 PE=1 SV=2					2	1	0	0	0	0	0	0	0	0	0	449.726	461.348	436.005	519.891	664.45	464.319	45.0217	41.9126	40.9851	43.0086	55.3797	49.3601	0	0	0	0	0	0	0	0	0	0	0	0	0	0	0	0	0	0	0
437	Q9Y376	CAB39	Calcium-binding protein 39 OS=Homo sapiens OX=9606 GN=CAB39 PE=1 SV=1					2	0	0	0	0	0	0	0	0	0	0	108.99	123.844	111.584	112.336	64.8855	119.735	0	0	0	0	0	0	0	0	0	0	0	0	0	0	0	0	0	0	0	0	0	0	0	0	0
438	Q8WUQ7	CACTIN	Cactin OS=Homo sapiens OX=9606 GN=CACTIN PE=1 SV=3					1	0	0	0	0	0	0	0	0	0	0	57.0571	57.4589	53.2541	65.8481	77.4391	54.3107	0	0	0	0	0	0	0	0	0	0	0	0	0	0	0	0	0	0	0	0	0	0	0	0	0
439	Q86Y37	CACUL1	CDK2-associated and cullin domain-containing protein 1 OS=Homo sapiens OX=9606 GN=CACUL1 PE=1 SV=1					2	0	0	0	0	0	0	0	0	0	0	117.331	119.05	111.143	127.607	172.838	101.997	0	0	0	0	0	0	0	0	0	0	0	0	0	0	0	0	0	0	0	0	0	0	0	0	0
440	Q9HB71	CACYBP	Calcyclin-binding protein OS=Homo sapiens OX=9606 GN=CACYBP PE=1 SV=2					5	4	3	2	1	0	0	0	0	0	0	50.1675	49.2361	49.6114	52.1083	262.505	43.2027	342.065	352.66	363.222	371.24	482.39	424.195	224.017	229.913	205.231	242.596	243.885	253.779	99.4087	105.141	103.107	117.822	103.199	125.434	31.0956	35.3865	43.5036	38.2639	37.5657	39.9705	0
441	P27708	CAD	CAD protein OS=Homo sapiens OX=9606 GN=CAD PE=1 SV=3					0	4	6	4	6	7	5	6	3	4	5	0	0	0	0	0	0	438.6	385.309	403.278	563.679	120.636	420.758	468.564	434.741	359.469	542.633	427.391	439.127	128.395	139.587	120.658	190.14	168.082	152.15	317.475	307.308	336.42	366.87	378.983	346.36	439.665
442	Q05682	CALD1	Caldesmon OS=Homo sapiens OX=9606 GN=CALD1 PE=1 SV=3					1	0	1	0	0	0	0	0	0	0	0	69.8946	73.0781	68.5869	73.804	102.82	70.309	0	0	0	0	0	0	18.9632	14.709	19.3787	22.5375	29.5248	24.0441	0	0	0	0	0	0	0	0	0	0	0	0	0
443	P0DP23	CALM1	Calmodulin-1 OS=Homo sapiens OX=9606 GN=CALM1 PE=1 SV=1					3	4	4	3	3	1	2	0	1	1	1	63.2909	74.1102	74.8974	72.0584	17.0112	61.9227	282.073	290.136	290.217	297.502	289.582	301.71	160.248	191.746	208.123	246.923	187.186	235.065	102.475	105.14	111.736	128.679	97.2334	103.46	168.923	177.298	173.785	170.298	155.029	145.891	89.4118
444	P27482	CALML3	Calmodulin-like protein 3 OS=Homo sapiens OX=9606 GN=CALML3 PE=1 SV=2					0	1	1	0	0	0	1	0	1	0	2	0	0	0	0	0	0	83.8457	85.9671	93.7637	93.8741	121.309	87.6518	60.2479	53.788	55.8715	66.3201	61.8489	68.0455	0	0	0	0	0	0	0	0	0	0	0	0	0
445	P27797	CALR	Calreticulin OS=Homo sapiens OX=9606 GN=CALR PE=1 SV=1					1	2	3	3	3	3	1	0	0	0	2	414.551	408.038	376.583	423.172	550.608	402.883	643.592	582.607	589.87	569.252	28.9108	615.079	243.189	233.04	213.013	233.165	277.223	231.815	511.893	505.918	508.895	618.922	615.012	570.846	303.17	354.989	339.373	384.337	332.768	340.594	224.28
446	O43852	CALU	Calumenin OS=Homo sapiens OX=9606 GN=CALU PE=1 SV=2					3	2	0	0	0	0	0	0	0	0	0	109.369	106.477	102.725	109.651	148.156	110.894	179.43	166.809	194.368	159.2	240.581	182.95	0	0	0	0	0	0	0	0	0	0	0	0	0	0	0	0	0	0	0
447	Q13557	CAMK2D	Calcium/calmodulin-dependent protein kinase type II subunit delta OS=Homo sapiens OX=9606 GN=CAMK2D PE=1 SV=3				Kinase	0	1	3	1	3	2	2	2	2	2	1	0	0	0	0	0	0	51.1498	47.309	61.8696	65.1959	70.3822	43.5557	335.139	299.411	296.003	379.287	318.001	327.633	208.484	187.169	193.118	277.051	232.535	230.209	211.134	196.198	229.384	219.209	197.86	195.558	137.044
448	Q13555	CAMK2G	Calcium/calmodulin-dependent protein kinase type II subunit gamma OS=Homo sapiens OX=9606 GN=CAMK2G PE=1 SV=4				Kinase	0	1	5	6	3	2	2	2	3	1	1	0	0	0	0	0	0	136.607	128.773	144.286	170.137	227.626	124.606	622.942	521.111	569.263	717.15	571.706	616.456	428.804	379.27	388.516	513.482	486.335	450.445	172.588	164.774	184.853	191.05	190.219	166.449	299.807
449	Q86VP6	CAND1	Cullin-associated NEDD8-dissociated protein 1 OS=Homo sapiens OX=9606 GN=CAND1 PE=1 SV=2					3	4	7	4	4	4	4	4	4	3	3	286.778	283.874	251.042	302.72	152.931	249.661	283.637	275.887	266.401	270.882	747.659	256.58	441.445	431.262	408.4	445.246	431.108	442.024	383.49	401.397	416.201	460.996	475.057	474.369	396.833	363.508	445.827	460.01	455.071	451.995	373.678
450	P27824	CANX	Calnexin OS=Homo sapiens OX=9606 GN=CANX PE=1 SV=2					4	3	5	3	6	4	5	4	5	4	6	534.853	516.212	560.638	680.619	800.548	503.709	251.697	207.604	211.322	272.163	300.499	281.588	568.811	475.833	432.312	631.542	557.368	704.614	159.14	157.24	138.081	190.961	176.719	223.77	659.114	594.945	559.638	659.308	535.857	813.387	421.426
451	Q01518	CAP1	Adenylyl cyclase-associated protein 1 OS=Homo sapiens OX=9606 GN=CAP1 PE=1 SV=5					3	5	3	3	3	2	0	1	0	0	0	226.923	219.855	231.376	250.931	269.075	197.439	509.137	498.077	389.727	499.999	568.213	651.643	243.061	225.058	225.761	271.158	256.342	249.239	397.529	349.969	373.242	409.154	397.962	386.006	167.286	152.265	179.119	174.005	169.568	166.322	178.38
452	P40121	CAPG	Macrophage-capping protein OS=Homo sapiens OX=9606 GN=CAPG PE=1 SV=2					0	1	0	0	0	0	0	0	0	0	0	0	0	0	0	0	0	24.3307	24.7712	22.0849	21.6906	31.0051	23.9572	0	0	0	0	0	0	0	0	0	0	0	0	0	0	0	0	0	0	0
453	P07384	CAPN1	Calpain-1 catalytic subunit OS=Homo sapiens OX=9606 GN=CAPN1 PE=1 SV=1					1	2	4	2	4	3	4	7	5	4	5	18.2728	13.5764	16.2051	18.78	8.64608	15.7617	116.036	100.675	107.821	116.384	84.0442	101.505	265.423	258.949	219.099	292.499	269.878	256.316	128.834	131.944	128.252	177.551	167.438	166.937	226.443	251.55	256.282	290.461	283.751	278.656	348.882
454	P17655	CAPN2	Calpain-2 catalytic subunit OS=Homo sapiens OX=9606 GN=CAPN2 PE=1 SV=6					2	4	3	3	3	4	4	4	3	3	4	132.588	147.113	140.48	171.318	210.872	134.736	232.245	211.829	252.501	257.971	268.489	227.886	360.014	287.3	313.779	455.94	349.586	337.324	193.941	165.034	256.095	264.027	232.107	182.494	578.041	495.715	630.962	702.176	623.652	595.205	636.375
455	Q9Y6W3	CAPN7	Calpain-7 OS=Homo sapiens OX=9606 GN=CAPN7 PE=1 SV=1					0	0	0	1	0	1	0	0	3	0	1	0	0	0	0	0	0	0	0	0	0	0	0	0	0	0	0	0	0	52.5503	53.0284	50.16	62.9211	70.5381	62.7926	0	0	0	0	0	0	319.997
456	P04632	CAPNS1	Calpain small subunit 1 OS=Homo sapiens OX=9606 GN=CAPNS1 PE=1 SV=1					3	2	3	5	4	3	4	4	4	3	5	89.3032	95.3393	92.139	90.8036	79.7289	89.5599	62.37	56.6623	61.6247	64.0197	37.456	55.6418	570.01	479.383	479.141	671.799	574.646	551.809	347.694	313.192	367.143	463.748	430.891	396.07	350.164	320.821	496.686	604.098	480.077	391.291	463.471
457	Q14444	CAPRIN1	Caprin-1 OS=Homo sapiens OX=9606 GN=CAPRIN1 PE=1 SV=2					1	4	2	5	4	5	4	3	5	3	3	33.5523	36.3315	39.6074	46.4348	0	43.6536	125.222	127.788	126.174	183.147	670.452	197.61	57.2247	53.8804	56.5577	130.818	99.4629	142.943	250.727	148.262	192.944	332.982	196.826	339.826	1026.04	692.965	604.252	685	479.785	761.106	452.762
458	P52907	CAPZA1	F-actin-capping protein subunit alpha-1 OS=Homo sapiens OX=9606 GN=CAPZA1 PE=1 SV=3					2	4	3	3	4	2	2	1	1	1	0	95.7632	107.076	102.053	108.144	5.89187	111.786	232.118	232.729	231.754	262.732	264.246	263.556	129.911	121.965	120.847	148.264	136.281	142.359	216.254	218.218	214.929	231.113	243.545	237.375	454.656	471.257	510.303	497.368	517.702	469.888	186.386
459	P47755	CAPZA2	F-actin-capping protein subunit alpha-2 OS=Homo sapiens OX=9606 GN=CAPZA2 PE=1 SV=3					4	2	2	3	1	2	0	0	1	0	1	228.697	214.895	216.089	247.927	143.468	214.371	236.568	247.296	221.16	268.978	91.5129	285.843	125.102	117.883	119.142	139.891	129.702	135.187	223.53	221.745	219.469	262.111	263.934	272.494	110.267	109.731	122.494	126.25	123.031	121.096	98.2159
460	P47756	CAPZB	F-actin-capping protein subunit beta OS=Homo sapiens OX=9606 GN=CAPZB PE=1 SV=4					3	4	2	1	4	3	1	0	0	0	2	159.185	159.57	161.361	175.885	64.9134	163.779	285.049	309.222	276.063	301.186	155.58	319.741	129.545	123.562	102.416	110.902	131.365	117.588	84.9965	72.5225	68.4219	87.0941	97.0806	86.4949	310.365	361.175	361.879	361.522	369.585	333.585	161.012
461	Q9BWT7	CARD10	Caspase recruitment domain-containing protein 10 OS=Homo sapiens OX=9606 GN=CARD10 PE=1 SV=2					0	0	0	0	1	0	0	0	0	0	0	0	0	0	0	0	0	0	0	0	0	0	0	0	0	0	0	0	0	0	0	0	0	0	0	30.5458	26.8948	36.8805	41.9432	35.5953	32.7578	0
462	Q9Y2V2	CARHSP1	Calcium-regulated heat-stable protein 1 OS=Homo sapiens OX=9606 GN=CARHSP1 PE=1 SV=2					2	0	0	0	1	0	0	0	0	0	0	255.742	262.401	239.093	277.37	371.365	246.222	0	0	0	0	0	0	0	0	0	0	0	0	0	0	0	0	0	0	81.0844	87.1282	80.1537	73.0551	92.0338	80.809	0
463	Q86X55	CARM1	Histone-arginine methyltransferase CARM1 OS=Homo sapiens OX=9606 GN=CARM1 PE=1 SV=3					3	4	3	2	3	2	1	3	2	2	1	122.91	115.57	97.1494	127.626	90.7522	94.8066	432.36	433.525	415.152	452.697	406.774	443.036	208.219	209.535	199.055	224.758	223.976	203.854	189.581	243.991	244.372	253.284	277.524	246.232	472.621	543.322	623.763	594.059	644.89	557.967	562.223
464	Q5VZK9	CARMIL1	F-actin-uncapping protein LRRC16A OS=Homo sapiens OX=9606 GN=CARMIL1 PE=1 SV=1					0	0	0	2	0	0	0	0	0	0	0	0	0	0	0	0	0	0	0	0	0	0	0	0	0	0	0	0	0	132.102	116.47	125.642	128.878	132.351	115.074	0	0	0	0	0	0	0
465	Q8N4J0	CARNMT1	Carnosine N-methyltransferase OS=Homo sapiens OX=9606 GN=CARNMT1 PE=1 SV=1					1	0	1	0	0	0	0	0	0	0	0	81.878	73.8836	65.3381	71.2559	103.096	66.2542	0	0	0	0	0	0	59.8288	54.489	40.689	58.2153	55.4446	50.2481	0	0	0	0	0	0	0	0	0	0	0	0	0
466	P49589	CARS	Cysteine--tRNA ligase, cytoplasmic OS=Homo sapiens OX=9606 GN=CARS PE=1 SV=3					2	2	2	0	1	0	0	0	0	0	0	62.9973	62.7371	62.9495	66.5578	89.3671	62.3057	66.8851	71.8725	62.1808	67.4308	19.1134	86.485	39.9976	38.5872	40.1391	42.4571	37.5383	44.5373	0	0	0	0	0	0	124.702	124.074	135.728	127.202	121.514	112.68	0
467	O15234	CASC3	Protein CASC3 OS=Homo sapiens OX=9606 GN=CASC3 PE=1 SV=2					0	0	1	0	0	1	1	3	1	4	0	0	0	0	0	0	0	0	0	0	0	0	0	46.7204	41.8637	34.5766	45.6923	38.7301	49.1322	0	0	0	0	0	0	0	0	0	0	0	0	157.086
468	P42575	CASP2	Caspase-2 OS=Homo sapiens OX=9606 GN=CASP2 PE=1 SV=2					1	1	0	0	1	0	0	0	0	0	0	90.4406	88.3514	95.7528	111.418	131.812	88.5097	99.2352	94.3034	97.7825	100.017	133.999	94.0639	0	0	0	0	0	0	0	0	0	0	0	0	138.588	128.497	161.556	140.486	148.445	134.141	0
469	P55212	CASP6	Caspase-6 OS=Homo sapiens OX=9606 GN=CASP6 PE=1 SV=2					2	1	0	0	0	0	0	0	0	0	0	225.114	215.941	204.041	217.344	277.798	202.143	36.3795	29.7217	29.6777	30.3932	42.742	32.4493	0	0	0	0	0	0	0	0	0	0	0	0	0	0	0	0	0	0	0
470	P55210	CASP7	Caspase-7 OS=Homo sapiens OX=9606 GN=CASP7 PE=1 SV=1					0	2	3	1	1	1	1	2	3	2	0	0	0	0	0	0	0	116.525	102.373	121.43	127.844	12.3274	136.328	103.936	102.556	112.549	115.288	106.268	113.794	42.0934	36.4129	42.7544	41.2924	45.4536	45.6766	34.7792	30.4354	33.468	34.9965	34.8972	32.9085	39.5977
471	Q14790	CASP8	Caspase-8 OS=Homo sapiens OX=9606 GN=CASP8 PE=1 SV=1					0	3	2	2	3	5	0	3	1	1	2	0	0	0	0	0	0	118.524	108.512	119.533	135.791	142.36	118.518	98.933	88.0244	79.2884	97.0055	90.753	90.4375	69.2869	66.6831	58.1656	74.2761	80.1642	74.3804	153.806	147.339	153.416	166.91	170.863	173.543	239.558
472	P20810	CAST	Calpastatin OS=Homo sapiens OX=9606 GN=CAST PE=1 SV=4					2	0	0	0	0	0	0	0	0	1	0	135.49	139.046	127.192	148.318	18.6388	127.249	0	0	0	0	0	0	0	0	0	0	0	0	0	0	0	0	0	0	0	0	0	0	0	0	0
473	P04040	CAT	Catalase OS=Homo sapiens OX=9606 GN=CAT PE=1 SV=3					1	2	0	0	0	0	0	0	0	0	0	37.776	38.3884	34.0625	36.8792	10.2795	34.1246	72.2401	72.3783	72.1178	71.1132	54.1506	93.956	0	0	0	0	0	0	0	0	0	0	0	0	0	0	0	0	0	0	0
474	Q03135	CAV1	Caveolin-1 OS=Homo sapiens OX=9606 GN=CAV1 PE=1 SV=4					1	2	2	4	3	4	5	4	6	4	4	33.014	42.689	51.6108	26.4313	50.4462	12.4297	442.304	461.429	546.127	494.318	715.634	382.012	264.894	234.649	255.564	342.279	267.737	316.206	632.651	541.666	515.227	1017.3	723.288	1002.71	455.965	386.975	374.617	762.99	477.812	632.574	618.629
475	P51636	CAV2	Caveolin-2 OS=Homo sapiens OX=9606 GN=CAV2 PE=1 SV=2					0	1	1	1	1	1	1	2	2	1	1	0	0	0	0	0	0	67.0774	65.3104	77.2923	79.18	86.1628	52.3721	88.5451	91.9875	59.2469	123.011	90.8492	92.5232	52.5412	53.6963	50.0844	98.6415	65.5079	82.258	94.1927	91.9605	81.6588	226.478	110.82	146.086	44.9569
476	Q6NZI2	CAVIN1	Caveolae-associated protein 1 OS=Homo sapiens OX=9606 GN=CAVIN1 PE=1 SV=1					0	2	5	4	4	4	4	4	5	4	3	0	0	0	0	0	0	151.25	139.951	128.972	170.645	164.028	150.405	288.05	259.131	222.475	319.302	282.511	254.413	216.758	211.928	188.591	265.901	270.249	246.712	381.638	393.606	336.963	530.31	479.937	488.069	646.103
477	Q969G5	CAVIN3	Caveolae-associated protein 3 OS=Homo sapiens OX=9606 GN=CAVIN3 PE=1 SV=3					0	0	0	0	2	2	2	4	3	3	1	0	0	0	0	0	0	0	0	0	0	0	0	0	0	0	0	0	0	0	0	0	0	0	0	933.861	1036.46	987.577	1645.21	1519.73	1467.84	90.823
478	Q13951	CBFB	Core-binding factor subunit beta OS=Homo sapiens OX=9606 GN=CBFB PE=1 SV=2					0	2	2	0	1	2	1	2	0	1	1	0	0	0	0	0	0	57.3173	57.5182	52.3171	67.5636	15.7273	61.3114	114.057	124.999	101.36	116.379	137.245	130.355	0	0	0	0	0	0	20.9991	25.6133	25.9413	27.6652	26.4624	28.2022	91.1787
479	Q13191	CBLB	E3 ubiquitin-protein ligase CBL-B OS=Homo sapiens OX=9606 GN=CBLB PE=1 SV=2			E3 ligase		1	1	0	0	0	0	0	0	0	0	0	54.6947	55.6739	56.5249	67.3919	102.296	50.3786	22.4888	21.5502	23.9742	22.2492	15.8725	21.6885	0	0	0	0	0	0	0	0	0	0	0	0	0	0	0	0	0	0	0
480	Q9BRT8	CBWD1	COBW domain-containing protein 1 OS=Homo sapiens OX=9606 GN=CBWD1 PE=2 SV=1					2	2	3	1	1	1	0	0	0	0	1	69.5425	71.4214	64.0514	66.8782	92.9991	75.5752	57.0605	52.794	54.6447	61.0208	71.2974	53.027	141.961	139.678	129.103	150.851	151.627	126.79	120.259	110.169	110.942	128.788	124.104	120.094	121.344	120.156	121.034	120.365	132.5	117.363	220.378
481	P83916	CBX1	Chromobox protein homolog 1 OS=Homo sapiens OX=9606 GN=CBX1 PE=1 SV=1					2	2	1	2	1	0	2	1	2	1	0	32.3279	38.9268	29.8821	40.8981	39.1374	26.1743	231.725	231.839	225.583	243.811	124.859	230.702	38.2951	32.2107	33.3534	41.6735	40.206	43.3482	74.4524	64.0089	72.1823	83.0686	88.1716	80.8156	77.762	73.4043	69.2355	71.6059	76.2199	75.6702	0
482	Q13185	CBX3	Chromobox protein homolog 3 OS=Homo sapiens OX=9606 GN=CBX3 PE=1 SV=4					2	3	2	2	1	1	2	2	0	1	3	109.875	126.835	104.667	115.872	159.651	107.843	262.47	257.978	242.534	269.878	356.846	276.561	197.902	213.088	171.621	206.674	247.837	239.38	169.269	137.935	176.823	158.571	152.48	151.414	123.497	129.83	134.904	123.046	138.444	133.853	133.869
483	O00257	CBX4	E3 SUMO-protein ligase CBX4 OS=Homo sapiens OX=9606 GN=CBX4 PE=1 SV=3					0	0	1	0	2	1	0	2	0	0	0	0	0	0	0	0	0	0	0	0	0	0	0	18.9771	17.7536	15.5051	18.0575	17.7504	20.5881	0	0	0	0	0	0	70.4988	65.5328	74.0456	63.0827	70.5058	68.9286	22.1902
484	P45973	CBX5	Chromobox protein homolog 5 OS=Homo sapiens OX=9606 GN=CBX5 PE=1 SV=1					1	2	1	0	2	1	2	4	1	2	1	37.0719	33.2572	35.1936	34.9545	48.632	31.5464	108.568	117.455	123.377	120.059	148.75	127.655	26.1384	21.201	21.8814	18.9876	24.1939	27.1007	0	0	0	0	0	0	122.583	117.83	121.578	119.251	127.767	125.196	61.5419
485	Q9HC52	CBX8	Chromobox protein homolog 8 OS=Homo sapiens OX=9606 GN=CBX8 PE=1 SV=3					0	0	1	0	1	2	1	1	2	1	0	0	0	0	0	0	0	0	0	0	0	0	0	27.9128	34.7448	31.4017	30.8421	41.7083	34.0491	0	0	0	0	0	0	61.169	59.4789	73.2361	57.5558	65.3025	62.5748	193.689
486	Q6P1N0	CC2D1A	Coiled-coil and C2 domain-containing protein 1A OS=Homo sapiens OX=9606 GN=CC2D1A PE=1 SV=1					1	0	0	0	0	0	0	0	0	0	0	16.0221	17.2213	12.8888	17.7532	5.13702	20.2101	0	0	0	0	0	0	0	0	0	0	0	0	0	0	0	0	0	0	0	0	0	0	0	0	0
487	Q8IX12	CCAR1	Cell division cycle and apoptosis regulator protein 1 OS=Homo sapiens OX=9606 GN=CCAR1 PE=1 SV=2					3	2	2	0	0	0	0	0	0	0	0	125.726	122.409	128.021	137.994	102.982	117.239	302.129	310.08	268.427	297.402	93.7816	326.754	65.4223	60.7608	53.6471	70.7376	69.6968	63.7532	0	0	0	0	0	0	0	0	0	0	0	0	0
488	Q8N163	CCAR2	Cell cycle and apoptosis regulator protein 2 OS=Homo sapiens OX=9606 GN=CCAR2 PE=1 SV=2					4	5	3	2	3	2	3	2	1	2	2	69.7659	82.4919	83.1282	89.9875	73.3225	53.6767	704.269	624.196	597.534	748.959	813.937	779.785	327.793	363.184	199.801	276.776	339.024	299.045	71.6176	88.5728	78.578	84.4322	90.8059	79.75	163.484	189.68	206.31	152.081	196.793	159.532	125.307
489	Q96CT7	CCDC124	Coiled-coil domain-containing protein 124 OS=Homo sapiens OX=9606 GN=CCDC124 PE=1 SV=1					3	0	1	4	3	4	2	2	4	3	2	109.742	187.789	204.499	203.12	85.8631	158.935	0	0	0	0	0	0	66.3726	60.1375	68.8059	111.525	83.4957	88.9229	556.862	434.593	479.459	277.438	219.558	303.984	391.591	320.256	305.435	195.094	170.357	257.441	452.966
490	Q6PK04	CCDC137	Coiled-coil domain-containing protein 137 OS=Homo sapiens OX=9606 GN=CCDC137 PE=1 SV=1					0	0	0	0	0	0	0	1	0	1	0	0	0	0	0	0	0	0	0	0	0	0	0	0	0	0	0	0	0	0	0	0	0	0	0	0	0	0	0	0	0	0
491	Q0P6D6	CCDC15	Coiled-coil domain-containing protein 15 OS=Homo sapiens OX=9606 GN=CCDC15 PE=2 SV=2					0	0	0	0	0	0	0	0	0	1	0	0	0	0	0	0	0	0	0	0	0	0	0	0	0	0	0	0	0	0	0	0	0	0	0	0	0	0	0	0	0	0
492	Q5M9N0	CCDC158	Coiled-coil domain-containing protein 158 OS=Homo sapiens OX=9606 GN=CCDC158 PE=2 SV=2					0	0	0	0	0	0	0	0	0	1	0	0	0	0	0	0	0	0	0	0	0	0	0	0	0	0	0	0	0	0	0	0	0	0	0	0	0	0	0	0	0	0
493	O60826	CCDC22	Coiled-coil domain-containing protein 22 OS=Homo sapiens OX=9606 GN=CCDC22 PE=1 SV=1					0	2	1	0	0	0	1	1	0	0	0	0	0	0	0	0	0	64.9821	65.5737	68.2485	75.4469	36.0288	72.2848	17.5905	14.704	13.0806	19.4371	18.2444	17.6225	0	0	0	0	0	0	0	0	0	0	0	0	0
494	Q96A33	CCDC47	Coiled-coil domain-containing protein 47 OS=Homo sapiens OX=9606 GN=CCDC47 PE=1 SV=1					3	4	4	3	3	2	3	4	3	4	2	70.1672	73.0309	65.8899	75.4574	127.443	65.371	566.141	537.245	553.304	576.084	201.897	615.433	466.155	461.935	459.494	531.274	467.765	486.763	420.7	429.156	428.867	521.278	487.304	455.591	450.671	441.053	500.763	525.21	501.635	470.652	512.889
495	Q2TAC2	CCDC57	Coiled-coil domain-containing protein 57 OS=Homo sapiens OX=9606 GN=CCDC57 PE=1 SV=2					1	0	0	0	0	0	0	0	0	0	0	39.9126	51.1549	55.0733	59.0113	6.8105	42.3488	0	0	0	0	0	0	0	0	0	0	0	0	0	0	0	0	0	0	0	0	0	0	0	0	0
496	Q4VC31	CCDC58	Coiled-coil domain-containing protein 58 OS=Homo sapiens OX=9606 GN=CCDC58 PE=1 SV=1					1	0	0	0	0	0	0	0	0	0	0	32.308	43.4232	47.5065	44.5937	3.70733	46.5634	0	0	0	0	0	0	0	0	0	0	0	0	0	0	0	0	0	0	0	0	0	0	0	0	0
497	Q9P031	CCDC59	Thyroid transcription factor 1-associated protein 26 OS=Homo sapiens OX=9606 GN=CCDC59 PE=1 SV=2					0	0	0	1	1	2	1	1	0	0	0	0	0	0	0	0	0	0	0	0	0	0	0	0	0	0	0	0	0	50.2298	39.4085	42.9296	27.2838	19.9562	19.3453	47.2759	41.9577	37.2984	23.6632	21.3819	24.7391	122.037
498	Q16204	CCDC6	Coiled-coil domain-containing protein 6 OS=Homo sapiens OX=9606 GN=CCDC6 PE=1 SV=2					1	0	0	0	0	0	0	0	0	0	0	30.6515	31.2579	28.9366	31.7984	9.759	26.2307	0	0	0	0	0	0	0	0	0	0	0	0	0	0	0	0	0	0	0	0	0	0	0	0	0
499	Q9H6F5	CCDC86	Coiled-coil domain-containing protein 86 OS=Homo sapiens OX=9606 GN=CCDC86 PE=1 SV=1					0	0	0	1	2	1	1	0	1	2	0	0	0	0	0	0	0	0	0	0	0	0	0	0	0	0	0	0	0	37.7199	30.2159	44.1424	36.3705	35.0432	33.2169	83.5918	74.0592	92.0322	80.7787	64.2717	84.0871	49.6455
500	Q53HC0	CCDC92	Coiled-coil domain-containing protein 92 OS=Homo sapiens OX=9606 GN=CCDC92 PE=1 SV=2					1	0	0	0	0	0	0	0	0	0	0	43.2051	40.6322	36.6661	41.0903	53.8032	33.7616	0	0	0	0	0	0	0	0	0	0	0	0	0	0	0	0	0	0	0	0	0	0	0	0	0
501	Q567U6	CCDC93	Coiled-coil domain-containing protein 93 OS=Homo sapiens OX=9606 GN=CCDC93 PE=1 SV=2					0	0	1	0	0	0	0	0	0	0	0	0	0	0	0	0	0	0	0	0	0	0	0	19.3848	16.8823	14.8792	21.4636	18.2724	19.0684	0	0	0	0	0	0	0	0	0	0	0	0	0
502	Q9BSQ5	CCM2	Cerebral cavernous malformations 2 protein OS=Homo sapiens OX=9606 GN=CCM2 PE=1 SV=1					0	0	0	0	0	0	0	0	1	0	0	0	0	0	0	0	0	0	0	0	0	0	0	0	0	0	0	0	0	0	0	0	0	0	0	0	0	0	0	0	0	0
503	P14635	CCNB1	G2/mitotic-specific cyclin-B1 OS=Homo sapiens OX=9606 GN=CCNB1 PE=1 SV=1					2	1	0	0	0	0	0	0	0	0	0	284.298	315.125	291.874	293.102	166.886	265.865	52.0341	57.9387	49.8374	56.8682	5.99477	70.8771	0	0	0	0	0	0	0	0	0	0	0	0	0	0	0	0	0	0	0
504	O95067	CCNB2	G2/mitotic-specific cyclin-B2 OS=Homo sapiens OX=9606 GN=CCNB2 PE=1 SV=1					1	1	0	0	0	0	0	0	0	1	0	130.893	129.025	133.894	138.749	83.4624	120.114	60.1618	56.1745	50.7319	53.2931	42.3387	53.8944	0	0	0	0	0	0	0	0	0	0	0	0	0	0	0	0	0	0	0
505	P24385	CCND1	G1/S-specific cyclin-D1 OS=Homo sapiens OX=9606 GN=CCND1 PE=1 SV=1					0	2	0	1	2	1	0	0	0	0	0	0	0	0	0	0	0	73.9961	74.892	83.0058	58.0285	59.6113	49.9577	0	0	0	0	0	0	55.2955	52.0987	61.3765	44.5692	41.9397	43.0438	179.93	200.464	257.14	161.744	149.426	120.273	76.0589
506	O95273	CCNDBP1	Cyclin-D1-binding protein 1 OS=Homo sapiens OX=9606 GN=CCNDBP1 PE=1 SV=2					1	0	0	0	0	0	0	0	0	0	0	36.6095	38.886	32.0042	37.9702	51.3278	35.6097	0	0	0	0	0	0	0	0	0	0	0	0	0	0	0	0	0	0	0	0	0	0	0	0	0
507	P51946	CCNH	Cyclin-H OS=Homo sapiens OX=9606 GN=CCNH PE=1 SV=1					0	1	0	0	0	0	0	0	0	0	0	0	0	0	0	0	0	41.4403	36.6896	42.085	48.3147	49.9798	41.6099	0	0	0	0	0	0	0	0	0	0	0	0	0	0	0	0	0	0	0
508	O75909	CCNK	Cyclin-K OS=Homo sapiens OX=9606 GN=CCNK PE=1 SV=2					1	0	0	0	0	0	0	0	0	0	0	31.8712	34.5566	31.4574	37.9167	81.2914	36.854	0	0	0	0	0	0	0	0	0	0	0	0	0	0	0	0	0	0	0	0	0	0	0	0	0
509	O60563	CCNT1	Cyclin-T1 OS=Homo sapiens OX=9606 GN=CCNT1 PE=1 SV=1					0	3	2	3	0	1	0	2	1	0	1	0	0	0	0	0	0	204.298	208.136	227.322	207.868	246.602	210.6	50.3865	40.4543	38.406	49.4755	45.1408	51.0114	151.386	133.279	151.321	174.84	175.708	153.658	0	0	0	0	0	0	45.5114
510	O60583	CCNT2	Cyclin-T2 OS=Homo sapiens OX=9606 GN=CCNT2 PE=1 SV=2					0	1	0	0	0	0	0	0	0	0	0	0	0	0	0	0	0	52.0603	57.4258	51.9915	61.5064	15.8852	52.9638	0	0	0	0	0	0	0	0	0	0	0	0	0	0	0	0	0	0	0
511	P78371	CCT2	T-complex protein 1 subunit beta OS=Homo sapiens OX=9606 GN=CCT2 PE=1 SV=4					2	5	6	6	3	4	6	4	4	5	2	163.28	153.053	164.947	175.964	200.744	153.708	877.005	877.102	843.112	1091.68	1078.94	888.362	734.165	581.674	762.113	794.95	721.844	805.928	610.699	509.248	592.225	656.361	637.267	597.252	748.152	748.977	853.458	898.698	870.598	836.058	608.309
512	P49368	CCT3	T-complex protein 1 subunit gamma OS=Homo sapiens OX=9606 GN=CCT3 PE=1 SV=4					3	6	5	5	4	9	6	4	5	4	8	185.574	170.613	175.271	202.1	104.135	145.544	293.675	278.965	277.009	328.906	212.771	278.612	899.314	706.288	726.341	938.281	946.834	1050.13	903.357	744.838	808.725	1024.61	1018.75	970.35	916.315	843.491	993.133	958.254	1014.48	912.222	1335.97
513	P50991	CCT4	T-complex protein 1 subunit delta OS=Homo sapiens OX=9606 GN=CCT4 PE=1 SV=4					2	6	5	5	6	4	4	3	5	4	2	90.3224	81.7536	79.5392	102.649	18.0294	76.3032	488.456	450.666	502.831	572.934	610.627	473.474	359.257	308.089	298.774	364.993	360.365	383.996	615.708	463.299	526.035	600.011	613.064	606.048	534.727	464.575	531.163	449.099	458.473	457.899	547.331
514	P48643	CCT5	T-complex protein 1 subunit epsilon OS=Homo sapiens OX=9606 GN=CCT5 PE=1 SV=1					1	4	5	5	6	4	8	5	5	5	5	93.3716	92.8314	88.3816	119.249	26.0994	86.8593	377.871	381.01	389.062	483.583	534.15	398.019	1324.76	1231.53	1178.13	1426.01	1264.36	1375.89	1426.29	1273.52	1366.83	1568.72	1547.54	1515.74	1445.29	1417.63	1539.48	1460.29	1534.93	1431.36	916.672
515	P40227	CCT6A	T-complex protein 1 subunit zeta OS=Homo sapiens OX=9606 GN=CCT6A PE=1 SV=3					3	7	6	4	4	4	4	5	3	4	4	164.549	151.558	160.914	187.93	237.311	136.072	885.257	833.055	846.159	1042.22	929.978	811.706	2008.45	1645.65	1423.37	1798.25	1699.49	1906.13	847.424	797.351	778.956	977.425	937.811	924.726	1024.19	897.656	977.697	949.171	966.022	944.029	905.582
516	Q99832	CCT7	T-complex protein 1 subunit eta OS=Homo sapiens OX=9606 GN=CCT7 PE=1 SV=2					2	7	5	7	6	5	6	8	6	7	5	76.9781	75.0244	71.4064	84.5626	80.2883	68.1792	839.89	803.591	847.372	975.776	430.805	789.461	803.63	770.351	592.344	821.655	740.825	786.69	564.02	536.533	526.486	652.696	667.335	652.417	679.633	733.624	823.798	885.201	828.879	807.766	800.219
517	P50990	CCT8	T-complex protein 1 subunit theta OS=Homo sapiens OX=9606 GN=CCT8 PE=1 SV=4					3	4	10	6	8	6	7	6	8	5	7	251.8	255.348	245.806	264.006	310.22	235.55	515.299	479.34	513.54	614.772	549.707	483.604	1652.25	1481.02	1512.5	1706.28	1574.5	1604.17	900.341	836.733	835.834	1043.52	988.333	937.679	1673.59	1513.13	1789.99	1739.52	1762.28	1644.42	1650.16
518	P86790	CCZ1B	Vacuolar fusion protein CCZ1 homolog B OS=Homo sapiens OX=9606 GN=CCZ1B PE=1 SV=1					0	0	1	0	0	0	0	0	0	0	0	0	0	0	0	0	0	0	0	0	0	0	0	16.9213	15.6919	14.4663	18.0083	14.8682	16.1718	0	0	0	0	0	0	0	0	0	0	0	0	0
519	Q6YHK3	CD109	CD109 antigen OS=Homo sapiens OX=9606 GN=CD109 PE=1 SV=2					2	2	3	0	1	3	1	2	1	0	1	197.087	202.678	204.038	209.222	324.269	128.807	193.148	185.666	167.56	192.798	136.712	210.259	69.1273	76.4766	73.6592	86.1295	77.4306	93.3655	0	0	0	0	0	0	62.6365	70.2444	53.0377	87.6562	82.3373	137.862	178.771
520	P48509	CD151	CD151 antigen OS=Homo sapiens OX=9606 GN=CD151 PE=1 SV=3					1	1	0	0	0	0	0	0	0	0	0	196.595	123.523	148.342	170.766	9.71797	139.634	109.068	87.0582	85.3093	100.141	4.53496	128.819	0	0	0	0	0	0	0	0	0	0	0	0	0	0	0	0	0	0	0
521	Q9Y5K6	CD2AP	CD2-associated protein OS=Homo sapiens OX=9606 GN=CD2AP PE=1 SV=1					2	1	0	0	0	0	0	0	0	0	0	128.599	117.126	117.422	124.308	167.574	116.441	51.8393	46.6776	39.9079	41.2502	52.1721	52.785	0	0	0	0	0	0	0	0	0	0	0	0	0	0	0	0	0	0	0
522	O95400	CD2BP2	CD2 antigen cytoplasmic tail-binding protein 2 OS=Homo sapiens OX=9606 GN=CD2BP2 PE=1 SV=1					0	1	2	4	5	2	4	3	5	4	3	0	0	0	0	0	0	46.5257	36.3354	33.2594	35.5832	20.5263	33.8217	41.4692	37.5857	35.2558	40.3284	39.15	37.5269	170.287	146.054	147.233	200.499	203.925	194.364	295.204	270.93	280.278	331.634	315.352	319.262	74.3167
523	Q9NPF0	CD320	CD320 antigen OS=Homo sapiens OX=9606 GN=CD320 PE=1 SV=1					0	0	1	0	0	0	0	0	0	0	0	0	0	0	0	0	0	0	0	0	0	0	0	50.2285	45.8676	39.986	59.9371	55.4426	61.0662	0	0	0	0	0	0	0	0	0	0	0	0	0
524	O15446	CD3EAP	DNA-directed RNA polymerase I subunit RPA34 OS=Homo sapiens OX=9606 GN=CD3EAP PE=1 SV=1					1	1	4	3	2	3	3	3	4	2	4	45.5581	48.387	51.9351	44.7335	77.4357	38.0786	45.3528	47.6054	53.8533	45.072	3.37871	59.4835	194.237	186.496	191.919	199.982	245.532	239.764	194.618	158.068	181.028	160.095	157.682	174.601	220.813	164.221	197.601	139.578	156.763	148.242	462.996
525	P16070	CD44	CD44 antigen OS=Homo sapiens OX=9606 GN=CD44 PE=1 SV=3					2	4	3	3	3	4	2	2	0	2	2	492.418	486.066	467.649	512.74	50.841	441.282	218.565	205.937	210.094	202.09	18.1605	207.172	185.202	175.385	192.625	265.193	191.35	239.147	120.502	111.794	95.3852	115.248	106.449	141.382	239.182	245.73	224.715	290.743	243.279	368.588	370.404
526	P13987	CD59	CD59 glycoprotein OS=Homo sapiens OX=9606 GN=CD59 PE=1 SV=1					0	0	1	0	0	0	0	0	0	0	0	0	0	0	0	0	0	0	0	0	0	0	0	177.551	166.487	147.558	203.908	169.932	206.044	0	0	0	0	0	0	0	0	0	0	0	0	0
527	P08962	CD63	CD63 antigen OS=Homo sapiens OX=9606 GN=CD63 PE=1 SV=2					1	1	0	0	0	0	0	0	0	0	0	17.4726	14.0871	15.0321	15.961	2.90894	19.0181	18.8903	16.6826	18.129	20.0923	7.03464	22.5557	0	0	0	0	0	0	0	0	0	0	0	0	0	0	0	0	0	0	0
528	P60033	CD81	CD81 antigen OS=Homo sapiens OX=9606 GN=CD81 PE=1 SV=1					0	1	0	0	0	0	0	0	0	0	0	0	0	0	0	0	0	27.9435	32.707	18.8395	23.8196	34.6865	27.8961	0	0	0	0	0	0	0	0	0	0	0	0	0	0	0	0	0	0	0
529	P21926	CD9	CD9 antigen OS=Homo sapiens OX=9606 GN=CD9 PE=1 SV=4					1	1	1	0	0	0	0	0	0	0	0	25.8152	50.9857	47.2693	36.8671	41.1579	39.1043	65.0847	63.9675	59.6484	64.1878	78.6311	81.7794	47.0191	45.7701	41.2137	58.1394	50.6299	65.6475	0	0	0	0	0	0	0	0	0	0	0	0	0
530	P48960	CD97	CD97 antigen OS=Homo sapiens OX=9606 GN=CD97 PE=1 SV=4					0	3	2	0	0	0	0	0	0	0	0	0	0	0	0	0	0	228.597	199.44	213.925	225.237	94.1357	220.325	83.6663	81.9151	73.8386	95.9775	86.8062	95.113	0	0	0	0	0	0	0	0	0	0	0	0	0
531	O75794	CDC123	Cell division cycle protein 123 homolog OS=Homo sapiens OX=9606 GN=CDC123 PE=1 SV=1					1	4	0	0	3	1	0	0	0	0	0	217.117	177.108	190.345	201.15	276.717	161.47	440.75	411.298	420.204	443.14	511.493	472.953	0	0	0	0	0	0	0	0	0	0	0	0	479.629	449.048	538.846	555.504	444.757	549.182	84.3143
532	Q13042	CDC16	Cell division cycle protein 16 homolog OS=Homo sapiens OX=9606 GN=CDC16 PE=1 SV=2					0	2	3	1	3	2	3	1	1	0	1	0	0	0	0	0	0	270.697	261.801	257.261	285.022	387.905	243.996	224.484	209.662	172.588	243.668	208.486	217.797	133.372	147.782	146.196	200.157	173.181	176.918	365.165	348.109	406.782	441.824	390.363	401.114	254.311
533	Q12834	CDC20	Cell division cycle protein 20 homolog OS=Homo sapiens OX=9606 GN=CDC20 PE=1 SV=2					0	1	3	3	1	2	1	3	1	1	0	0	0	0	0	0	0	135.093	128.096	128.939	145.21	146.783	131.735	123.261	97.0535	136.613	124.667	94.6819	115.738	160.028	137.116	146.998	178.419	150.961	154.397	125.212	84.3484	110.939	88.0737	97.108	102.042	79.6338
534	Q9UJX2	CDC23	Cell division cycle protein 23 homolog OS=Homo sapiens OX=9606 GN=CDC23 PE=1 SV=3					0	1	4	3	2	1	1	1	0	0	0	0	0	0	0	0	0	19.1838	24.9505	20.2459	33.2534	3.34966	23.5945	213.724	199.851	158.227	236.555	190.19	217.076	206.901	209.623	191.528	268.213	265.746	282.224	227.161	243.849	254.568	318.772	277.713	301.702	33.1434
535	P30260	CDC27	Cell division cycle protein 27 homolog OS=Homo sapiens OX=9606 GN=CDC27 PE=1 SV=2					0	2	3	1	3	3	3	3	3	3	3	0	0	0	0	0	0	59.4725	60.3715	56.4142	66.8853	42.2058	68.7692	275.643	243.46	257.431	277.42	262.153	269.094	49.5744	42.0659	44.7469	51.0594	51.7769	50.5122	228.864	215.9	248.216	248.717	241.536	240.745	385.993
536	P49427	CDC34	Ubiquitin-conjugating enzyme E2 R1 OS=Homo sapiens OX=9606 GN=CDC34 PE=1 SV=2					3	0	0	0	0	0	0	0	0	0	0	63.9889	58.9824	59.9403	61.511	266.304	51.9306	0	0	0	0	0	0	0	0	0	0	0	0	0	0	0	0	0	0	0	0	0	0	0	0	0
537	Q16543	CDC37	Hsp90 co-chaperone Cdc37 OS=Homo sapiens OX=9606 GN=CDC37 PE=1 SV=1					2	4	2	3	2	2	4	4	2	4	2	98.9545	96.8134	96.082	112.057	249.314	95.1578	223.814	212.917	213.232	244.523	276.124	251.845	390.902	358.503	364.894	365.048	378.143	381.711	445.993	396.611	389.811	449.864	476.001	462.827	261.735	272.376	305.316	281.951	304.268	311.442	334.706
538	P60953	CDC42	Cell division control protein 42 homolog OS=Homo sapiens OX=9606 GN=CDC42 PE=1 SV=2					6	3	3	4	1	3	2	1	1	2	2	414.178	447.948	421.173	437.247	499.014	428.242	379.94	370.975	376.161	392.426	350.211	416.675	211.701	203.086	199.959	211.691	201.057	251.37	344.336	371.57	323.497	432.253	394.957	505.814	159.416	165.865	161.118	183.136	158.844	217.909	469.559
539	Q5VT25	CDC42BPA	Serine/threonine-protein kinase MRCK alpha OS=Homo sapiens OX=9606 GN=CDC42BPA PE=1 SV=1				Kinase	0	1	3	1	2	1	1	2	3	1	2	0	0	0	0	0	0	64.5953	77.1046	58.9755	64.5966	45.4499	72.71	172.082	161.71	139.571	179.096	155.641	160.442	150.53	128.142	126.638	165.75	153.504	154.573	282.127	260.913	263.936	287.343	273.813	286.201	85.4963
540	Q9Y5S2	CDC42BPB	Serine/threonine-protein kinase MRCK beta OS=Homo sapiens OX=9606 GN=CDC42BPB PE=1 SV=2				Kinase	0	1	2	1	1	3	4	3	1	3	2	0	0	0	0	0	0	42.8019	40.0411	39.0584	41.2598	50.3331	48.3299	201.561	167.291	190.44	227.644	194.08	192.445	95.4208	85.5361	87.9523	111.204	108.817	97.7567	325.492	283.437	380.432	401.193	364.932	331.48	327.197
541	Q6DT37	CDC42BPG	Serine/threonine-protein kinase MRCK gamma OS=Homo sapiens OX=9606 GN=CDC42BPG PE=1 SV=2				Kinase	0	0	1	1	0	1	0	0	0	0	0	0	0	0	0	0	0	0	0	0	0	0	0	139.094	120.065	106.706	142.072	130.078	131.07	155.505	147.742	145.069	195.843	188.123	173.826	0	0	0	0	0	0	356.04
542	O14613	CDC42EP2	Cdc42 effector protein 2 OS=Homo sapiens OX=9606 GN=CDC42EP2 PE=1 SV=1					1	0	0	0	0	0	0	0	0	0	0	19.93	23.1471	21.6706	30.2281	31.8285	27.9892	0	0	0	0	0	0	0	0	0	0	0	0	0	0	0	0	0	0	0	0	0	0	0	0	0
543	Q9H3Q1	CDC42EP4	Cdc42 effector protein 4 OS=Homo sapiens OX=9606 GN=CDC42EP4 PE=1 SV=1					1	0	0	0	0	0	0	0	0	0	0	28.9079	27.9133	27.9602	32.031	0	33.267	0	0	0	0	0	0	0	0	0	0	0	0	0	0	0	0	0	0	0	0	0	0	0	0	0
544	O75419	CDC45	Cell division control protein 45 homolog OS=Homo sapiens OX=9606 GN=CDC45 PE=1 SV=1					0	0	0	2	0	1	1	1	1	0	0	0	0	0	0	0	0	0	0	0	0	0	0	0	0	0	0	0	0	503.033	550.877	477.832	565.423	664.904	611.877	0	0	0	0	0	0	169.332
545	Q99459	CDC5L	Cell division cycle 5-like protein OS=Homo sapiens OX=9606 GN=CDC5L PE=1 SV=2					0	2	3	5	1	3	5	3	4	3	3	0	0	0	0	0	0	143.591	149.413	165.523	141.99	91.492	169.05	127.535	123.466	118.897	145.834	135.165	159.188	260.191	217.751	240.525	300.909	281.336	317.224	26.297	24.1656	25.0788	26.3211	27.4865	26.4251	228.764
546	Q99741	CDC6	Cell division control protein 6 homolog OS=Homo sapiens OX=9606 GN=CDC6 PE=1 SV=1					0	0	0	0	0	0	0	1	0	0	0	0	0	0	0	0	0	0	0	0	0	0	0	0	0	0	0	0	0	0	0	0	0	0	0	0	0	0	0	0	0	0
547	Q6P1J9	CDC73	Parafibromin OS=Homo sapiens OX=9606 GN=CDC73 PE=1 SV=1					2	2	0	1	1	2	1	1	2	2	1	134.433	144.245	129.554	135.167	174.004	123.64	252.94	255.243	237.431	258.216	373.793	253.202	0	0	0	0	0	0	218.806	244.133	217.334	287.258	277.13	244.78	46.0458	46.3372	46.1437	55.5443	53.965	45.9378	266.1
548	Q69YH5	CDCA2	Cell division cycle-associated protein 2 OS=Homo sapiens OX=9606 GN=CDCA2 PE=1 SV=2					0	0	2	0	1	0	0	1	0	0	0	0	0	0	0	0	0	0	0	0	0	0	0	41.5839	46.9188	51.883	52.0797	48.1127	53.5475	0	0	0	0	0	0	86.4295	98.0994	113.411	87.3877	92.1099	91.4093	0
549	Q53HL2	CDCA8	Borealin OS=Homo sapiens OX=9606 GN=CDCA8 PE=1 SV=2					0	0	0	1	0	1	0	2	2	2	1	0	0	0	0	0	0	0	0	0	0	0	0	0	0	0	0	0	0	20.1151	14.7895	19.9696	15.978	14.9504	17.8558	0	0	0	0	0	0	87.0667
550	Q9H5V8	CDCP1	CUB domain-containing protein 1 OS=Homo sapiens OX=9606 GN=CDCP1 PE=1 SV=3					2	3	3	1	1	1	1	0	1	1	0	45.2042	51.0437	51.3403	53.648	46.0246	43.6586	277.37	251.357	263.892	308.456	37.7732	299.782	212.983	200.937	219.346	292.972	240.651	275.952	74.5548	76.8382	77.1188	100.695	98.6864	130.898	26.7148	29.3813	29.1379	31.5642	26.4832	40.4102	70.325
551	P12830	CDH1	Cadherin-1 OS=Homo sapiens OX=9606 GN=CDH1 PE=1 SV=3					0	2	0	0	0	0	0	0	0	0	0	0	0	0	0	0	0	55.6292	54.4503	59.6164	60.1829	80.9381	65.1645	0	0	0	0	0	0	0	0	0	0	0	0	0	0	0	0	0	0	0
552	P22223	CDH3	Cadherin-3 OS=Homo sapiens OX=9606 GN=CDH3 PE=1 SV=2					0	1	0	0	0	0	1	1	0	0	0	0	0	0	0	0	0	30.5742	27.8722	28.4924	27.7082	6.86218	34.3746	0	0	0	0	0	0	0	0	0	0	0	0	0	0	0	0	0	0	0
553	O14735	CDIPT	CDP-diacylglycerol--inositol 3-phosphatidyltransferase OS=Homo sapiens OX=9606 GN=CDIPT PE=1 SV=1					0	0	0	0	0	0	0	0	1	0	0	0	0	0	0	0	0	0	0	0	0	0	0	0	0	0	0	0	0	0	0	0	0	0	0	0	0	0	0	0	0	0
554	P06493	CDK1	Cyclin-dependent kinase 1 OS=Homo sapiens OX=9606 GN=CDK1 PE=1 SV=3				Kinase	2	3	1	2	3	2	3	2	0	1	0	279.234	289.809	286.006	301.922	30.996	294.974	224.063	229.242	234.909	267.268	196.484	247.718	105.729	101.721	102.534	114.03	106.497	106.816	156.942	147.141	167.222	161.94	185.92	169.462	211.58	224.965	233.921	208.014	249.787	206.22	61.7333
555	P21127	CDK11B	Cyclin-dependent kinase 11B OS=Homo sapiens OX=9606 GN=CDK11B PE=1 SV=4				Kinase	2	3	0	0	0	0	0	0	0	0	0	181.947	181.331	174.229	226.957	129.942	190.731	314.372	303.037	287.065	370.209	410.478	410.32	0	0	0	0	0	0	0	0	0	0	0	0	0	0	0	0	0	0	0
556	Q9NYV4	CDK12	Cyclin-dependent kinase 12 OS=Homo sapiens OX=9606 GN=CDK12 PE=1 SV=2				Kinase	0	0	0	0	0	0	4	2	1	2	0	0	0	0	0	0	0	0	0	0	0	0	0	0	0	0	0	0	0	0	0	0	0	0	0	0	0	0	0	0	0	0
557	Q14004	CDK13	Cyclin-dependent kinase 13 OS=Homo sapiens OX=9606 GN=CDK13 PE=1 SV=2				Kinase	0	1	0	2	0	0	1	2	2	1	1	0	0	0	0	0	0	76.1619	75.9172	65.8696	76.0021	68.6024	78.6654	0	0	0	0	0	0	257.857	249.142	259.907	303.85	315.614	288.663	0	0	0	0	0	0	0
558	P24941	CDK2	Cyclin-dependent kinase 2 OS=Homo sapiens OX=9606 GN=CDK2 PE=1 SV=2				Kinase	7	3	1	0	1	0	1	0	0	0	0	278.384	332.672	317.958	340.229	252.696	317.178	138.873	143.899	131.597	136.013	157.504	147.422	25.2586	20.8027	19.5141	24.8452	22.151	24.8735	0	0	0	0	0	0	31.6991	34.2916	34.8093	33.0258	36.9736	34.5045	0
559	O14519	CDK2AP1	Cyclin-dependent kinase 2-associated protein 1 OS=Homo sapiens OX=9606 GN=CDK2AP1 PE=1 SV=1					0	3	2	1	0	0	2	1	0	0	0	0	0	0	0	0	0	378.273	380.777	420.505	526.172	407.136	384.422	106.684	106.682	93.1318	107.283	120.299	106.732	106.472	101.396	93.1333	100.051	113.543	104.687	0	0	0	0	0	0	0
560	P11802	CDK4	Cyclin-dependent kinase 4 OS=Homo sapiens OX=9606 GN=CDK4 PE=1 SV=2				Kinase	4	1	0	0	0	1	1	0	0	0	1	279.642	263.412	253.692	282.762	403.422	244.021	175.016	169.472	167.349	179.37	41.9274	174.641	0	0	0	0	0	0	0	0	0	0	0	0	0	0	0	0	0	0	93.2668
561	Q00535	CDK5	Cyclin-dependent-like kinase 5 OS=Homo sapiens OX=9606 GN=CDK5 PE=1 SV=3				Kinase	0	1	2	0	0	0	0	0	1	1	0	0	0	0	0	0	0	77.8208	75.0934	68.7314	76.358	15.3516	78.3197	56.0664	46.814	42.3783	55.4262	52.4786	57.4138	0	0	0	0	0	0	0	0	0	0	0	0	0
562	Q96SZ6	CDK5RAP1	CDK5 regulatory subunit-associated protein 1 OS=Homo sapiens OX=9606 GN=CDK5RAP1 PE=1 SV=2					0	0	1	1	0	1	1	0	1	0	2	0	0	0	0	0	0	0	0	0	0	0	0	64.726	70.6686	69.1792	77.3406	63.5311	62.0492	21.2525	24.8825	21.4043	27.6414	27.1287	24.4725	0	0	0	0	0	0	63.0247
563	Q96SN8	CDK5RAP2	CDK5 regulatory subunit-associated protein 2 OS=Homo sapiens OX=9606 GN=CDK5RAP2 PE=1 SV=5					0	0	1	0	0	0	0	0	0	0	0	0	0	0	0	0	0	0	0	0	0	0	0	30.073	27.6483	25.9512	32.8126	29.5133	27.7153	0	0	0	0	0	0	0	0	0	0	0	0	0
564	Q96JB5	CDK5RAP3	CDK5 regulatory subunit-associated protein 3 OS=Homo sapiens OX=9606 GN=CDK5RAP3 PE=1 SV=2					1	0	1	0	0	0	0	0	0	0	0	53.1307	50.6531	45.3744	51.2078	58.2645	49.2994	0	0	0	0	0	0	52.983	41.2628	50.3942	46.3229	53.4129	48.9271	0	0	0	0	0	0	0	0	0	0	0	0	0
565	Q00534	CDK6	Cyclin-dependent kinase 6 OS=Homo sapiens OX=9606 GN=CDK6 PE=1 SV=1				Kinase	1	0	0	0	0	0	0	0	0	0	0	40.507	40.5545	39.4097	39.231	12.4873	43.535	0	0	0	0	0	0	0	0	0	0	0	0	0	0	0	0	0	0	0	0	0	0	0	0	0
566	P50613	CDK7	Cyclin-dependent kinase 7 OS=Homo sapiens OX=9606 GN=CDK7 PE=1 SV=1				Kinase	2	2	1	0	0	0	0	0	0	0	0	240.192	229.53	260.063	264.806	308.951	214.839	88.0411	87.6571	77.3972	93.1292	128.634	103.364	46.0713	60.6885	51.5841	66.9437	67.4705	58.6675	0	0	0	0	0	0	0	0	0	0	0	0	0
567	P50750	CDK9	Cyclin-dependent kinase 9 OS=Homo sapiens OX=9606 GN=CDK9 PE=1 SV=3				Kinase	0	2	4	2	2	2	2	3	0	0	0	0	0	0	0	0	0	88.7799	82.7211	75.1253	83.9736	51.8005	77.7187	140.362	151.924	141.205	182.372	150.501	147.129	59.6682	61.6483	54.7865	71	73.863	66.6808	91.8	106.042	115.735	127.031	115.269	98.9268	65.3529
568	Q5VV42	CDKAL1	Threonylcarbamoyladenosine tRNA methylthiotransferase OS=Homo sapiens OX=9606 GN=CDKAL1 PE=1 SV=1					0	1	2	0	0	0	0	2	0	0	0	0	0	0	0	0	0	36.0853	31.333	28.6349	31.5359	24.9961	32.3013	106.064	93.2155	78.0125	107.955	85.1646	96.9159	0	0	0	0	0	0	0	0	0	0	0	0	0
569	Q96T59	CDRT15	CMT1A duplicated region transcript 15 protein OS=Homo sapiens OX=9606 GN=CDRT15 PE=2 SV=1					0	0	0	0	0	0	0	0	0	0	1	0	0	0	0	0	0	0	0	0	0	0	0	0	0	0	0	0	0	0	0	0	0	0	0	0	0	0	0	0	0	0
570	O95674	CDS2	Phosphatidate cytidylyltransferase 2 OS=Homo sapiens OX=9606 GN=CDS2 PE=1 SV=1					0	0	1	0	0	1	0	0	2	0	0	0	0	0	0	0	0	0	0	0	0	0	0	41.0373	39.6052	36.1146	41.9158	41.762	45.6997	0	0	0	0	0	0	0	0	0	0	0	0	69.8492
571	Q15517	CDSN	Corneodesmosin OS=Homo sapiens OX=9606 GN=CDSN PE=1 SV=3					0	0	0	0	0	0	0	0	0	0	1	0	0	0	0	0	0	0	0	0	0	0	0	0	0	0	0	0	0	0	0	0	0	0	0	0	0	0	0	0	0	0
572	Q9UKY7	CDV3	Protein CDV3 homolog OS=Homo sapiens OX=9606 GN=CDV3 PE=1 SV=1					2	3	1	0	0	0	0	0	0	0	0	18.9229	26.7705	20.9795	25.8426	68.5625	18.7026	261.964	283.876	298.504	283.688	361.303	303.864	30.5075	27.6002	36.1075	28.7088	39.6256	35.4463	0	0	0	0	0	0	0	0	0	0	0	0	0
573	Q9Y232	CDYL	Chromodomain Y-like protein OS=Homo sapiens OX=9606 GN=CDYL PE=1 SV=2					0	0	1	0	0	0	0	0	0	0	0	0	0	0	0	0	0	0	0	0	0	0	0	52.3848	50.2078	53.8424	57.2311	49.2621	51.3519	0	0	0	0	0	0	0	0	0	0	0	0	0
574	Q03701	CEBPZ	CCAAT/enhancer-binding protein zeta OS=Homo sapiens OX=9606 GN=CEBPZ PE=1 SV=3					0	0	0	1	2	1	1	1	1	3	0	0	0	0	0	0	0	0	0	0	0	0	0	0	0	0	0	0	0	17.0405	14.2659	13.7113	12.5936	15.5683	12.0688	118.674	88.6005	89.2555	82.2651	79.7973	77.6647	38.7718
575	Q92879	CELF1	CUGBP Elav-like family member 1 OS=Homo sapiens OX=9606 GN=CELF1 PE=1 SV=2					1	1	0	1	0	0	0	0	0	0	0	66.7818	66.2384	65.3847	65.0261	80.7707	49.8517	91.0411	89.9442	89.0806	90.9982	116.529	88.878	0	0	0	0	0	0	72.1862	90.2155	79.5246	90.6585	106.055	99.8532	0	0	0	0	0	0	0
576	P49454	CENPF	Centromere protein F OS=Homo sapiens OX=9606 GN=CENPF PE=1 SV=3					2	0	0	0	0	0	0	0	0	0	0	242.631	300.487	321.264	255.618	24.4376	285.624	0	0	0	0	0	0	0	0	0	0	0	0	0	0	0	0	0	0	0	0	0	0	0	0	0
577	Q9BU64	CENPO	Centromere protein O OS=Homo sapiens OX=9606 GN=CENPO PE=1 SV=1					0	0	0	0	0	0	0	1	0	0	0	0	0	0	0	0	0	0	0	0	0	0	0	0	0	0	0	0	0	0	0	0	0	0	0	0	0	0	0	0	0	0
578	A8MT69	CENPX	Centromere protein X OS=Homo sapiens OX=9606 GN=CENPX PE=1 SV=1					0	0	1	0	0	0	0	0	0	0	0	0	0	0	0	0	0	0	0	0	0	0	0	71.0855	76.578	69.2056	95.9749	84.6531	85.2389	0	0	0	0	0	0	0	0	0	0	0	0	0
579	Q9UPN4	CEP131	Centrosomal protein of 131 kDa OS=Homo sapiens OX=9606 GN=CEP131 PE=1 SV=3					0	0	0	0	0	0	1	2	4	2	2	0	0	0	0	0	0	0	0	0	0	0	0	0	0	0	0	0	0	0	0	0	0	0	0	0	0	0	0	0	0	0
580	Q5SW79	CEP170	Centrosomal protein of 170 kDa OS=Homo sapiens OX=9606 GN=CEP170 PE=1 SV=1					0	1	0	0	1	0	0	1	0	0	0	0	0	0	0	0	0	65.5321	53.5247	51.0239	67.7129	72.2071	62.5716	0	0	0	0	0	0	0	0	0	0	0	0	100.366	92.1468	104.94	94.9146	98.3169	94.5481	0
581	Q9C0F1	CEP44	Centrosomal protein of 44 kDa OS=Homo sapiens OX=9606 GN=CEP44 PE=1 SV=2					1	1	1	0	0	0	0	0	0	0	0	60.063	60.2209	56.1433	80.0253	54.2088	76.5879	49.281	43.0477	33.7472	48.1896	33.589	46.4979	54.1278	40.412	31.0755	57.5472	30.1151	53.0053	0	0	0	0	0	0	0	0	0	0	0	0	0
582	Q53EZ4	CEP55	Centrosomal protein of 55 kDa OS=Homo sapiens OX=9606 GN=CEP55 PE=1 SV=3					0	1	0	0	1	1	2	1	1	1	1	0	0	0	0	0	0	40.7906	49.4474	41.4819	49.9099	18.1788	44.5169	0	0	0	0	0	0	0	0	0	0	0	0	49.9396	51.4535	54.079	54.496	53.167	54.0919	48.2308
583	Q5JTW2	CEP78	Centrosomal protein of 78 kDa OS=Homo sapiens OX=9606 GN=CEP78 PE=1 SV=1					0	0	1	3	1	0	0	2	0	1	1	0	0	0	0	0	0	0	0	0	0	0	0	552.664	453.314	362.755	505.755	441.133	412.435	416.344	360.814	372.412	530.367	413.287	417.262	394.765	345.488	369.276	446.953	360.66	369.016	0
584	Q8IW35	CEP97	Centrosomal protein of 97 kDa OS=Homo sapiens OX=9606 GN=CEP97 PE=1 SV=1					0	1	0	0	0	0	0	0	0	0	0	0	0	0	0	0	0	101.71	87.6157	96.306	104.832	144.341	92.61	0	0	0	0	0	0	0	0	0	0	0	0	0	0	0	0	0	0	0
585	Q9Y6K0	CEPT1	Choline/ethanolaminephosphotransferase 1 OS=Homo sapiens OX=9606 GN=CEPT1 PE=1 SV=1					0	0	1	1	1	0	2	0	1	1	2	0	0	0	0	0	0	0	0	0	0	0	0	364.268	327.97	310.17	390.112	369.251	353.08	400.634	353.616	385.547	471.798	455.467	424.622	354.305	353.568	419.599	452.362	445.114	405.404	0
586	Q8TCT0	CERK	Ceramide kinase OS=Homo sapiens OX=9606 GN=CERK PE=1 SV=1					0	0	0	0	0	0	0	0	1	0	0	0	0	0	0	0	0	0	0	0	0	0	0	0	0	0	0	0	0	0	0	0	0	0	0	0	0	0	0	0	0	0
587	Q96G23	CERS2	Ceramide synthase 2 OS=Homo sapiens OX=9606 GN=CERS2 PE=1 SV=1					1	0	2	2	2	1	0	0	0	2	0	56.2758	58.6129	64.9478	78.3943	3.50329	60.4919	0	0	0	0	0	0	107.613	81.4499	88.2359	106.193	76.5141	110.795	161.991	157.697	170.654	210.2	186.446	191.633	111.866	109.24	135.882	136.348	126.315	131.865	84.5111
588	P41208	CETN2	Centrin-2 OS=Homo sapiens OX=9606 GN=CETN2 PE=1 SV=1					0	0	1	4	2	3	2	1	1	2	2	0	0	0	0	0	0	0	0	0	0	0	0	82.0669	83.8419	66.0988	103.219	94.7785	97.9607	109.578	100.8	107.497	106.91	113.467	110.517	225.494	234.15	227.868	203.628	214.246	196.315	228.805
589	O15182	CETN3	Centrin-3 OS=Homo sapiens OX=9606 GN=CETN3 PE=1 SV=2					0	0	0	0	0	0	1	0	0	1	0	0	0	0	0	0	0	0	0	0	0	0	0	0	0	0	0	0	0	0	0	0	0	0	0	0	0	0	0	0	0	0
590	Q494V2	CFAP100	Cilia- and flagella-associated protein 100 OS=Homo sapiens OX=9606 GN=CFAP100 PE=2 SV=1					0	1	1	1	1	0	0	0	0	0	0	0	0	0	0	0	0	55.7579	43.6883	34.7948	48.9064	42.3779	47.5856	36.5934	35.0596	29.1577	48.5709	30.2237	38.1739	82.5358	62.5086	52.0768	90.7514	47.9141	78.8432	57.33	62.6142	56.142	61.2009	38.2713	63.6664	0
591	Q9Y6A4	CFAP20	Cilia- and flagella-associated protein 20 OS=Homo sapiens OX=9606 GN=CFAP20 PE=1 SV=1					0	2	1	0	0	0	1	0	0	0	1	0	0	0	0	0	0	120.281	133.035	110.129	140.892	44.9318	181.723	41.3549	43.0738	37.7533	55.0951	52.5641	55.0461	0	0	0	0	0	0	0	0	0	0	0	0	0
592	P57076	CFAP298	Cilia- and flagella-associated protein 298 OS=Homo sapiens OX=9606 GN=CFAP298 PE=1 SV=1					0	1	0	0	0	0	0	0	0	0	0	0	0	0	0	0	0	30.4419	31.8909	33.6306	38.3005	47.0926	38.1197	0	0	0	0	0	0	0	0	0	0	0	0	0	0	0	0	0	0	0
593	Q5T0N1	CFAP70	Cilia- and flagella-associated protein 70 OS=Homo sapiens OX=9606 GN=CFAP70 PE=2 SV=3					0	1	0	0	0	0	0	0	0	0	0	0	0	0	0	0	0	59.896	53.5198	57.3633	59.5076	76.6536	56.534	0	0	0	0	0	0	0	0	0	0	0	0	0	0	0	0	0	0	0
594	P23528	CFL1	Cofilin-1 OS=Homo sapiens OX=9606 GN=CFL1 PE=1 SV=3					2	3	3	2	2	2	2	3	3	2	4	140.445	165.024	143.395	147.153	182.902	155.646	772.045	803.63	694.524	806.685	908.316	820.452	271.308	288.667	213.357	240.567	255.986	283.351	238.947	229.767	203.496	240.003	246.954	254.539	403.113	434.606	441.759	417.834	467.661	428.859	302.733
595	Q9Y281	CFL2	Cofilin-2 OS=Homo sapiens OX=9606 GN=CFL2 PE=1 SV=1					2	2	2	2	2	1	2	2	1	0	0	41.0598	51.0411	38.4598	49.6724	29.5973	51.4	99.5644	113.413	104.522	123.309	150.902	124.65	320.918	315.643	304.159	356.594	330.961	352.395	237.235	234.461	243.851	252.92	283.059	276.836	345.247	359.629	406.345	390.238	421.572	368.092	139.53
596	Q8WUX2	CHAC2	Glutathione-specific gamma-glutamylcyclotransferase 2 OS=Homo sapiens OX=9606 GN=CHAC2 PE=1 SV=1					1	0	0	0	0	0	0	0	0	0	0	57.0549	63.1861	53.7013	60.283	25.7794	66.5198	0	0	0	0	0	0	0	0	0	0	0	0	0	0	0	0	0	0	0	0	0	0	0	0	0
597	Q13111	CHAF1A	Chromatin assembly factor 1 subunit A OS=Homo sapiens OX=9606 GN=CHAF1A PE=1 SV=3					1	1	1	1	1	0	1	1	1	0	0	134.057	130.205	126.104	117.129	175.006	91.8909	151.489	140.78	136.431	145.284	166.157	150.873	139.107	141.199	109.035	135.542	137.874	130.031	17.5728	15.7145	15.3188	13.5642	10.1051	9.20392	265.107	262.383	236.277	219.406	199.439	217.09	0
598	Q13112	CHAF1B	Chromatin assembly factor 1 subunit B OS=Homo sapiens OX=9606 GN=CHAF1B PE=1 SV=1					0	1	0	0	0	0	0	0	0	0	1	0	0	0	0	0	0	36.5481	29.6938	28.2443	32.836	32.014	33.6823	0	0	0	0	0	0	0	0	0	0	0	0	0	0	0	0	0	0	0
599	Q96JM3	CHAMP1	Chromosome alignment-maintaining phosphoprotein 1 OS=Homo sapiens OX=9606 GN=CHAMP1 PE=1 SV=2					0	1	0	0	0	0	0	0	0	0	0	0	0	0	0	0	0	83.2663	91.9853	86.1414	86.6379	143.956	73.2498	0	0	0	0	0	0	0	0	0	0	0	0	0	0	0	0	0	0	0
600	Q96BP2	CHCHD1	Coiled-coil-helix-coiled-coil-helix domain-containing protein 1 OS=Homo sapiens OX=9606 GN=CHCHD1 PE=1 SV=1					0	0	2	0	1	0	0	0	0	0	0	0	0	0	0	0	0	0	0	0	0	0	0	38.0889	36.4293	32.4246	39.0537	42.9415	36.9983	0	0	0	0	0	0	137.785	155.257	183.557	135.091	146.047	143.301	0
601	Q9NX63	CHCHD3	MICOS complex subunit MIC19 OS=Homo sapiens OX=9606 GN=CHCHD3 PE=1 SV=1					0	0	2	4	4	4	3	3	3	3	4	0	0	0	0	0	0	0	0	0	0	0	0	86.5258	83.0468	114.022	92.0089	90.8314	118.327	154.696	139.632	181.947	182.664	182.919	224.912	328.9	316.223	439.659	364.55	377.901	458.966	300.19
602	Q8N4Q1	CHCHD4	Mitochondrial intermembrane space import and assembly protein 40 OS=Homo sapiens OX=9606 GN=CHCHD4 PE=1 SV=1					0	3	2	2	2	2	2	1	2	2	2	0	0	0	0	0	0	355.638	332.744	385.927	374.41	470.134	378.912	47.4355	48.4591	40.9677	55.075	69.1114	63.5422	130.233	115.219	139.055	145.467	150.062	140.849	94.363	96.9786	99.5327	87.054	113.942	98.3954	72.6659
603	O14646	CHD1	Chromodomain-helicase-DNA-binding protein 1 OS=Homo sapiens OX=9606 GN=CHD1 PE=1 SV=2					0	0	0	2	1	2	0	2	0	3	2	0	0	0	0	0	0	0	0	0	0	0	0	0	0	0	0	0	0	124.911	120.575	97.4715	242.871	113.737	228.309	56.3104	67.3976	63.8803	68.1886	71.4081	59.9969	164.592
604	Q86WJ1	CHD1L	Chromodomain-helicase-DNA-binding protein 1-like OS=Homo sapiens OX=9606 GN=CHD1L PE=1 SV=3					0	0	0	1	2	2	0	0	0	0	0	0	0	0	0	0	0	0	0	0	0	0	0	0	0	0	0	0	0	150.834	156.136	159.196	195.239	205.782	174.444	170.628	171.228	185.824	183.23	183.304	160.543	478.101
605	O14647	CHD2	Chromodomain-helicase-DNA-binding protein 2 OS=Homo sapiens OX=9606 GN=CHD2 PE=1 SV=2					0	0	1	0	0	0	0	1	0	0	3	0	0	0	0	0	0	0	0	0	0	0	0	22.4364	18.8538	20.6769	27.0899	19.4492	31.5171	0	0	0	0	0	0	0	0	0	0	0	0	0
606	Q12873	CHD3	Chromodomain-helicase-DNA-binding protein 3 OS=Homo sapiens OX=9606 GN=CHD3 PE=1 SV=3					0	4	4	3	3	2	1	3	2	2	4	0	0	0	0	0	0	483.839	458.48	468.606	507.963	401.063	472.2	230.154	224.224	207.153	265.66	246.447	227.144	130.1	137.812	116.354	139.563	145.792	128.278	392.397	418.763	445.503	411.309	451.712	407.547	305.709
607	Q14839	CHD4	Chromodomain-helicase-DNA-binding protein 4 OS=Homo sapiens OX=9606 GN=CHD4 PE=1 SV=2			E3 ligase		1	3	4	2	2	2	2	3	2	3	2	74.898	74.2869	76.8827	89.297	10.2186	57.93	345.214	305.18	319.836	323.983	385.547	311.001	518.173	513.837	452.735	526.218	588.36	523.15	171.836	152.65	155.606	179.591	198.041	160.196	301.692	287.69	315.621	271.178	287.847	278.512	100.846
608	Q8TDI0	CHD5	Chromodomain-helicase-DNA-binding protein 5 OS=Homo sapiens OX=9606 GN=CHD5 PE=1 SV=1			E3 ligase		0	3	2	2	2	2	2	2	3	3	2	0	0	0	0	0	0	276.836	263.011	273.239	290.199	15.6189	273.817	45.8356	48.5748	48.2551	45.9825	46.8379	51.3148	92.4614	98.223	107.333	113.954	113.877	107.252	30.5115	32.7602	39.304	40.1396	34.4778	41.4008	59.5634
609	Q8TD26	CHD6	Chromodomain-helicase-DNA-binding protein 6 OS=Homo sapiens OX=9606 GN=CHD6 PE=1 SV=4					0	0	0	0	0	0	0	0	0	0	1	0	0	0	0	0	0	0	0	0	0	0	0	0	0	0	0	0	0	0	0	0	0	0	0	0	0	0	0	0	0	0
610	Q9P2D1	CHD7	Chromodomain-helicase-DNA-binding protein 7 OS=Homo sapiens OX=9606 GN=CHD7 PE=1 SV=3					0	0	0	0	0	0	0	0	1	1	0	0	0	0	0	0	0	0	0	0	0	0	0	0	0	0	0	0	0	0	0	0	0	0	0	0	0	0	0	0	0	0
611	Q9HCK8	CHD8	Chromodomain-helicase-DNA-binding protein 8 OS=Homo sapiens OX=9606 GN=CHD8 PE=1 SV=5					0	1	1	0	1	0	0	1	0	0	0	0	0	0	0	0	0	48.7374	46.9237	45.2007	52.0195	56.8343	51.8209	44.556	37.1624	36.9295	40.1738	34.8341	44.9878	0	0	0	0	0	0	61.6154	53.703	58.5929	49.4361	47.9104	54.7691	0
612	Q8NE62	CHDH	Choline dehydrogenase, mitochondrial OS=Homo sapiens OX=9606 GN=CHDH PE=1 SV=2					0	0	0	0	0	0	0	0	0	0	1	0	0	0	0	0	0	0	0	0	0	0	0	0	0	0	0	0	0	0	0	0	0	0	0	0	0	0	0	0	0	0
613	O14757	CHEK1	Serine/threonine-protein kinase Chk1 OS=Homo sapiens OX=9606 GN=CHEK1 PE=1 SV=2				Kinase	0	0	0	0	1	0	0	0	0	0	0	0	0	0	0	0	0	0	0	0	0	0	0	0	0	0	0	0	0	0	0	0	0	0	0	34.2009	34.9283	33.3182	34.2482	28.9114	29.4672	0
614	O96017	CHEK2	Serine/threonine-protein kinase Chk2 OS=Homo sapiens OX=9606 GN=CHEK2 PE=1 SV=1				Kinase	0	1	0	0	0	0	0	0	1	0	0	0	0	0	0	0	0	11.2587	10.0188	11.4905	12.9977	20.7057	13.2881	0	0	0	0	0	0	0	0	0	0	0	0	0	0	0	0	0	0	0
615	Q8IWX8	CHERP	Calcium homeostasis endoplasmic reticulum protein OS=Homo sapiens OX=9606 GN=CHERP PE=1 SV=3					1	3	3	0	3	3	1	2	1	1	2	63.3461	62.0591	63.3629	75.8404	45.2979	59.8783	257.002	220.872	223.23	248.567	203.818	259.065	336.262	318.348	311.192	371.742	306.644	352.058	0	0	0	0	0	0	517.242	471.465	563.161	528.397	538.255	562.927	170.825
616	Q9BWS9	CHID1	Chitinase domain-containing protein 1 OS=Homo sapiens OX=9606 GN=CHID1 PE=1 SV=1					1	0	0	0	0	0	0	0	0	0	0	72.0844	80.3139	71.597	73.0463	100.117	67.1428	0	0	0	0	0	0	0	0	0	0	0	0	0	0	0	0	0	0	0	0	0	0	0	0	0
617	Q9Y3E7	CHMP3	Charged multivesicular body protein 3 OS=Homo sapiens OX=9606 GN=CHMP3 PE=1 SV=3					2	0	0	0	0	0	0	0	0	0	0	71.7556	77.0021	69.1759	73.2561	37.3112	71.7394	0	0	0	0	0	0	0	0	0	0	0	0	0	0	0	0	0	0	0	0	0	0	0	0	0
618	Q9BY43	CHMP4A	Charged multivesicular body protein 4a OS=Homo sapiens OX=9606 GN=CHMP4A PE=1 SV=3					1	0	0	0	0	0	0	0	0	0	0	12.2984	21.3631	18.0002	19.7751	8.2213	17.3647	0	0	0	0	0	0	0	0	0	0	0	0	0	0	0	0	0	0	0	0	0	0	0	0	0
619	Q9H444	CHMP4B	Charged multivesicular body protein 4b OS=Homo sapiens OX=9606 GN=CHMP4B PE=1 SV=1					2	0	0	0	0	0	0	0	0	0	0	55.5151	76.8958	82.9466	77.97	80.2583	67.4247	0	0	0	0	0	0	0	0	0	0	0	0	0	0	0	0	0	0	0	0	0	0	0	0	0
620	Q9NZZ3	CHMP5	Charged multivesicular body protein 5 OS=Homo sapiens OX=9606 GN=CHMP5 PE=1 SV=1					2	3	0	0	0	0	0	0	0	0	0	99.3571	121.744	111.013	121.864	102.363	91.875	61.8071	65.8717	58.8147	69.5885	43.1269	73.8862	0	0	0	0	0	0	0	0	0	0	0	0	0	0	0	0	0	0	0
621	Q8WUX9	CHMP7	Charged multivesicular body protein 7 OS=Homo sapiens OX=9606 GN=CHMP7 PE=1 SV=1					1	0	0	0	0	0	0	0	0	0	0	32.3858	38.7254	26.9997	30.3646	11.8799	37.4624	0	0	0	0	0	0	0	0	0	0	0	0	0	0	0	0	0	0	0	0	0	0	0	0	0
622	Q9UHD1	CHORDC1	Cysteine and histidine-rich domain-containing protein 1 OS=Homo sapiens OX=9606 GN=CHORDC1 PE=1 SV=2					3	2	2	0	0	0	0	0	0	0	0	166.564	156.099	159.695	177.64	236.573	163.725	105.731	108.38	91.5217	102.954	119.036	126.386	105.414	80.056	105.998	94.7302	96.9256	110.39	0	0	0	0	0	0	0	0	0	0	0	0	0
623	Q99653	CHP1	Calcineurin B homologous protein 1 OS=Homo sapiens OX=9606 GN=CHP1 PE=1 SV=3					2	1	3	4	2	4	3	3	1	0	2	44.8746	66.8364	68.0124	57.7134	25.9171	57.5174	97.5664	104.27	101.157	124.493	22.4744	114.706	146.804	142.115	150.534	172.766	166.073	175.095	179.051	163.74	162.601	194.472	188.408	204.645	92.2071	103.023	106.189	100.549	116.054	104.226	143.77
624	Q8IZ52	CHPF	Chondroitin sulfate synthase 2 OS=Homo sapiens OX=9606 GN=CHPF PE=1 SV=2					0	1	1	2	3	4	2	0	1	3	1	0	0	0	0	0	0	28.1424	24.5895	27.0295	25.3584	2.3083	24.336	108.284	94.2026	93.7969	106.432	94.6069	98.7662	120.845	140.889	127.307	130.087	145.565	157.452	199.579	208.875	210.511	211.146	218.858	221.651	277.245
625	Q9NRG0	CHRAC1	Chromatin accessibility complex protein 1 OS=Homo sapiens OX=9606 GN=CHRAC1 PE=1 SV=1					2	2	0	0	0	0	0	0	0	0	0	149.7	168.627	170.95	179.62	162.381	151.134	84.4888	93.3817	89.4488	95.3976	115.477	104.856	0	0	0	0	0	0	0	0	0	0	0	0	0	0	0	0	0	0	0
626	Q8WVB6	CHTF18	Chromosome transmission fidelity protein 18 homolog OS=Homo sapiens OX=9606 GN=CHTF18 PE=1 SV=1					0	2	1	3	4	1	0	3	2	4	0	0	0	0	0	0	0	64.972	62.5208	61.7663	72.7801	13.1553	61.0924	57.2353	47.4578	49.3723	64.5967	57.7952	61.1958	252.35	231.33	231.801	327.26	300.057	286.096	247.682	228.264	244.263	258.007	259.21	247.301	59.0329
627	Q9Y3Y2	CHTOP	Chromatin target of PRMT1 protein OS=Homo sapiens OX=9606 GN=CHTOP PE=1 SV=2					0	0	0	0	2	1	0	0	0	0	0	0	0	0	0	0	0	0	0	0	0	0	0	0	0	0	0	0	0	0	0	0	0	0	0	97.0572	89.2592	109.18	102.85	116.407	89.603	31.3006
628	O15111	CHUK	Inhibitor of nuclear factor kappa-B kinase subunit alpha OS=Homo sapiens OX=9606 GN=CHUK PE=1 SV=2				Kinase	0	2	2	3	3	3	3	4	2	3	5	0	0	0	0	0	0	179.93	163.376	167.738	200.847	243.645	158.587	203.029	163.627	93.6495	269.561	211.658	172.472	691.716	728.673	742.007	983.842	903.753	832.202	701.247	677.893	834.434	961.373	870.378	819.903	736.657
629	O76071	CIAO1	Probable cytosolic iron-sulfur protein assembly protein CIAO1 OS=Homo sapiens OX=9606 GN=CIAO1 PE=1 SV=1					0	1	0	0	0	0	0	0	0	0	0	0	0	0	0	0	0	34.0843	33.3311	29.7728	35.6225	8.44681	34.5398	0	0	0	0	0	0	0	0	0	0	0	0	0	0	0	0	0	0	0
630	Q9Y3D0	CIAO2B	Cytosolic iron-sulfur assembly component 2B OS=Homo sapiens OX=9606 GN=CIAO2B PE=1 SV=1					1	2	1	1	3	2	2	0	0	0	0	30.0682	27.5264	28.1615	36.1199	11.7918	30.4704	160.9	160.879	161.701	197.024	28.9382	176.093	112.93	104.914	93.0348	129.444	129.579	119.518	93.6623	84.2709	91.4487	114.432	132.441	103.266	183.069	190.085	191.838	205.661	250.666	212.545	146.439
631	Q8TCG1	CIP2A	Protein CIP2A OS=Homo sapiens OX=9606 GN=CIP2A PE=1 SV=2					0	2	1	0	1	0	0	0	0	0	0	0	0	0	0	0	0	104.319	100.933	106.318	99.7276	116.001	99.9929	266.755	263.615	124.927	267.525	251.321	255.953	0	0	0	0	0	0	72.2385	89.1028	92.0716	104.552	102.543	101.545	0
632	Q14011	CIRBP	Cold-inducible RNA-binding protein OS=Homo sapiens OX=9606 GN=CIRBP PE=1 SV=1					3	2	1	3	2	2	2	1	0	1	0	76.5098	77.1837	76.2427	76.3374	94.3734	67.7199	88.7032	86.3134	97.946	91.0956	105.285	82.3427	77.4197	54.8109	60.4214	67.3629	56.422	76.969	125.129	119.456	90.4431	121.238	97.3986	120.508	131.689	158.334	124.391	137.306	116.155	148.403	92.9782
633	Q9NZ45	CISD1	CDGSH iron-sulfur domain-containing protein 1 OS=Homo sapiens OX=9606 GN=CISD1 PE=1 SV=1					0	0	0	0	1	0	0	0	0	0	0	0	0	0	0	0	0	0	0	0	0	0	0	0	0	0	0	0	0	0	0	0	0	0	0	148.143	148.324	170.564	149.719	154.014	157.826	0
634	Q8N5K1	CISD2	CDGSH iron-sulfur domain-containing protein 2 OS=Homo sapiens OX=9606 GN=CISD2 PE=1 SV=1					2	0	0	0	0	0	0	0	0	0	0	110.476	145.478	144.256	125.26	183.414	131.447	0	0	0	0	0	0	0	0	0	0	0	0	0	0	0	0	0	0	0	0	0	0	0	0	0
635	O14578	CIT	Citron Rho-interacting kinase OS=Homo sapiens OX=9606 GN=CIT PE=1 SV=2				Kinase	0	0	0	0	0	0	0	1	0	0	0	0	0	0	0	0	0	0	0	0	0	0	0	0	0	0	0	0	0	0	0	0	0	0	0	0	0	0	0	0	0	0
636	Q8WWK9	CKAP2	Cytoskeleton-associated protein 2 OS=Homo sapiens OX=9606 GN=CKAP2 PE=1 SV=1					1	0	0	0	0	0	0	0	1	0	0	99.3673	108.131	98.4082	93.4429	136.89	93.0559	0	0	0	0	0	0	0	0	0	0	0	0	0	0	0	0	0	0	0	0	0	0	0	0	0
637	Q07065	CKAP4	Cytoskeleton-associated protein 4 OS=Homo sapiens OX=9606 GN=CKAP4 PE=1 SV=2					1	2	1	3	2	2	2	3	2	3	1	10.2142	12.6473	15.1679	11.7079	21.4741	13.6152	121.324	112.173	114.024	118.801	89.5667	122.671	37.0835	29.7252	34.049	45.727	40.6558	48.3725	145.662	128.267	120.42	148.895	116.398	148.975	93.9976	84.6695	93.1751	109.778	88.9421	118.22	57.0801
638	Q14008	CKAP5	Cytoskeleton-associated protein 5 OS=Homo sapiens OX=9606 GN=CKAP5 PE=1 SV=3					2	0	2	1	3	2	3	3	1	2	2	37.7916	40.5512	29.5366	37.1193	39.6819	33.1564	0	0	0	0	0	0	129.715	129.175	111.448	117.797	130.187	136.932	63.2226	65.9706	60.1834	73.1041	84.8599	75.9507	333.377	357.83	390.744	401.229	381.915	374.379	84.2
639	P12277	CKB	Creatine kinase B-type OS=Homo sapiens OX=9606 GN=CKB PE=1 SV=1					3	3	3	1	2	1	0	0	0	0	0	230.071	215.63	210.028	243.745	25.4241	228.9	294.72	288.585	246.588	290.114	65.474	352.169	134.741	134.533	156.311	177.806	162.66	157.2	64.8635	44.5852	53.1977	51.2116	81.9511	77.6659	96.3791	117.119	118.574	122.51	109.094	131.788	54.0869
640	P12532	CKMT1A	Creatine kinase U-type, mitochondrial OS=Homo sapiens OX=9606 GN=CKMT1A PE=1 SV=1					1	0	0	0	0	1	3	1	3	2	3	41.6578	47.468	53.2858	50.7019	10.4754	34.1608	0	0	0	0	0	0	0	0	0	0	0	0	0	0	0	0	0	0	0	0	0	0	0	0	313.95
641	Q7Z460	CLASP1	CLIP-associating protein 1 OS=Homo sapiens OX=9606 GN=CLASP1 PE=1 SV=1					1	2	0	0	0	0	0	0	0	0	0	99.8803	102.405	95.7948	122.301	124.899	98.0647	75.5249	74.7977	80.3791	79.6713	112.686	71.0988	0	0	0	0	0	0	0	0	0	0	0	0	0	0	0	0	0	0	0
642	P56747	CLDN6	Claudin-6 OS=Homo sapiens OX=9606 GN=CLDN6 PE=1 SV=2					1	0	0	0	0	0	0	0	0	0	0	37.4909	47.3138	40.6539	40.7537	18.0714	47.9436	0	0	0	0	0	0	0	0	0	0	0	0	0	0	0	0	0	0	0	0	0	0	0	0	0
643	Q9NY35	CLDND1	Claudin domain-containing protein 1 OS=Homo sapiens OX=9606 GN=CLDND1 PE=1 SV=1					1	0	0	0	0	0	0	0	0	0	0	29.2663	35.3586	34.9478	28.1567	39.2461	26.0908	0	0	0	0	0	0	0	0	0	0	0	0	0	0	0	0	0	0	0	0	0	0	0	0	0
644	Q2KHT3	CLEC16A	Protein CLEC16A OS=Homo sapiens OX=9606 GN=CLEC16A PE=1 SV=2					0	1	1	1	0	0	1	0	0	0	0	0	0	0	0	0	0	39.4143	30.5542	41.1453	35.6963	47.4594	21.427	48.9779	47.3663	36.2558	40.7939	38.7997	49.2256	36.4775	35.627	30.839	43.1938	37.9513	47.8431	0	0	0	0	0	0	0
645	O00299	CLIC1	Chloride intracellular channel protein 1 OS=Homo sapiens OX=9606 GN=CLIC1 PE=1 SV=4					3	4	3	2	1	3	3	4	2	2	3	194.548	197.352	180.231	196.724	75.9285	196.335	174.158	198.015	166.108	172.698	254.489	176.144	117.325	125.145	109.849	107.347	122.528	109.318	132.822	149.283	131.283	149.988	183.437	145.362	30.1415	21.6954	20.1902	8.18953	17.0562	15.1453	260.814
646	Q9Y696	CLIC4	Chloride intracellular channel protein 4 OS=Homo sapiens OX=9606 GN=CLIC4 PE=1 SV=4					2	4	3	3	3	2	2	3	1	4	2	639.845	555.105	612.043	599.318	793.208	550.79	295.124	275.998	258.347	291.971	254.24	297.37	166.959	159.276	149.551	168.931	162.973	166.967	155.246	161.437	179.22	207.716	216.877	190.223	382.873	403.017	444.644	436.73	489.717	458.769	260.649
647	Q14677	CLINT1	Clathrin interactor 1 OS=Homo sapiens OX=9606 GN=CLINT1 PE=1 SV=1					0	0	0	1	1	0	0	1	1	1	0	0	0	0	0	0	0	0	0	0	0	0	0	0	0	0	0	0	0	46.8502	46.2266	50.7622	47.095	51.9987	48.1865	116.848	120.655	121.947	111.637	132.984	113.265	0
648	P49761	CLK3	Dual specificity protein kinase CLK3 OS=Homo sapiens OX=9606 GN=CLK3 PE=1 SV=3				Kinase	0	0	1	1	0	1	2	0	2	1	2	0	0	0	0	0	0	0	0	0	0	0	0	71.0502	54.7251	61.5852	81.1618	69.7691	71.7079	91.3159	95.7606	88.5033	129.244	114.392	110.165	0	0	0	0	0	0	228.116
649	O75503	CLN5	Ceroid-lipofuscinosis neuronal protein 5 OS=Homo sapiens OX=9606 GN=CLN5 PE=1 SV=2					2	0	0	0	0	0	0	0	0	0	0	134.023	137.334	128.699	135.191	144.066	124.341	0	0	0	0	0	0	0	0	0	0	0	0	0	0	0	0	0	0	0	0	0	0	0	0	0
650	P54105	CLNS1A	Methylosome subunit pICln OS=Homo sapiens OX=9606 GN=CLNS1A PE=1 SV=1					0	2	1	1	0	0	0	0	1	1	0	0	0	0	0	0	0	74.8787	66.3744	67.2375	75.831	19.1173	74.5933	16.8529	15.876	19.3903	16.4893	20.4124	13.3642	43.5774	42.9155	39.274	45.3656	49.7955	44.0314	0	0	0	0	0	0	0
651	Q9H078	CLPB	Caseinolytic peptidase B protein homolog OS=Homo sapiens OX=9606 GN=CLPB PE=1 SV=1					1	1	0	0	0	0	0	0	0	0	0	42.8297	38.9818	39.7014	43.3454	4.95311	42.3789	52.9342	59.6643	56.5654	62.8592	66.4273	59.909	0	0	0	0	0	0	0	0	0	0	0	0	0	0	0	0	0	0	0
652	Q16740	CLPP	ATP-dependent Clp protease proteolytic subunit, mitochondrial OS=Homo sapiens OX=9606 GN=CLPP PE=1 SV=1					0	3	3	4	3	2	2	3	2	2	1	0	0	0	0	0	0	265.644	275.59	278.699	355.272	331.027	242.651	146.518	148.111	120.386	190.999	166.101	187.912	228.541	206.774	238.294	276.067	281.984	307.573	239.967	250.94	265.925	270.524	288.784	277.621	194.948
653	O96005	CLPTM1	Cleft lip and palate transmembrane protein 1 OS=Homo sapiens OX=9606 GN=CLPTM1 PE=1 SV=1					2	4	0	0	2	2	0	0	0	0	0	55.3954	64.5914	53.5215	61.3317	75.6203	58.0076	227.674	215.869	221.837	238.105	181.631	239.077	0	0	0	0	0	0	0	0	0	0	0	0	71.5403	67.2597	78.3791	81.296	80.1999	101.296	55.297
654	Q96KA5	CLPTM1L	Cleft lip and palate transmembrane protein 1-like protein OS=Homo sapiens OX=9606 GN=CLPTM1L PE=1 SV=1					1	2	3	0	0	0	0	0	0	0	0	42.78	47.76	51.5924	45.6797	38.334	42.2141	60.4809	57.2916	57.5903	51.1188	413.398	39.2006	219.816	201.396	197.882	221.621	203.21	228.844	0	0	0	0	0	0	0	0	0	0	0	0	0
655	O76031	CLPX	ATP-dependent Clp protease ATP-binding subunit clpX-like, mitochondrial OS=Homo sapiens OX=9606 GN=CLPX PE=1 SV=2					0	2	1	3	4	3	3	4	4	4	2	0	0	0	0	0	0	108.996	89.1845	98.1266	116.975	124.738	79.4501	22.7234	22.6177	24.37	24.114	20.3495	20.5105	155.012	160.302	150.481	202.937	189.374	189.675	346.107	336.346	393.019	418.611	387.171	369.002	131.744
656	P09496	CLTA	Clathrin light chain A OS=Homo sapiens OX=9606 GN=CLTA PE=1 SV=1					1	3	4	2	3	3	2	4	3	2	2	46.2318	41.9422	47.3662	45.323	2.71032	31.997	228.568	209.938	232.17	251.364	29.4211	243.294	454.491	404.011	428.982	590.614	530.152	691.455	159.783	150.238	131.84	186.73	186.056	245.937	319.405	310.109	298.318	350.705	366.862	479.055	404.79
657	P09497	CLTB	Clathrin light chain B OS=Homo sapiens OX=9606 GN=CLTB PE=1 SV=1					0	1	3	3	1	1	4	1	3	3	2	0	0	0	0	0	0	56.0604	51.8694	60.7863	65.9632	72.4829	51.7929	200.711	167.955	212.955	262.972	224.311	249.305	104.944	80.0662	87.9325	109.488	107.648	136.148	123.163	113.097	109.323	137.136	134.087	173.022	87.5863
658	Q00610	CLTC	Clathrin heavy chain 1 OS=Homo sapiens OX=9606 GN=CLTC PE=1 SV=5					6	6	5	5	8	9	4	6	7	4	8	506.786	478.585	477.383	519.338	283.717	348.333	554.16	497.579	529.123	625.96	589.261	552.716	810.898	616.631	759.316	992.45	863.719	929.007	594.56	493.2	597.871	818.456	709.85	800.944	802.429	718.604	875.813	1084.06	962.261	1090.12	1548.08
659	O75153	CLUH	Clustered mitochondria protein homolog OS=Homo sapiens OX=9606 GN=CLUH PE=1 SV=2					5	3	4	3	3	3	3	3	2	1	2	781.922	770.782	744.151	913.596	75.05	761.747	121.025	120.981	111.5	110.963	81.1076	114.17	298.246	271.821	268.888	293.67	280.417	265.753	352.394	419.97	359.832	407.011	405.434	404.841	331.172	363.535	397.439	380.5	355.308	348.745	395.473
660	Q8NFW8	CMAS	N-acylneuraminate cytidylyltransferase OS=Homo sapiens OX=9606 GN=CMAS PE=1 SV=2					0	3	0	1	1	1	3	1	3	3	2	0	0	0	0	0	0	367.474	343.097	365.502	433.503	111.747	349.381	0	0	0	0	0	0	117.803	118.042	104.261	150.821	131.573	133.246	247.504	218.428	241.155	250.372	247.974	221.389	202.73
661	Q96DG6	CMBL	Carboxymethylenebutenolidase homolog OS=Homo sapiens OX=9606 GN=CMBL PE=1 SV=1					3	5	1	0	0	1	2	1	1	0	0	316.706	309.732	286.168	327.427	121.256	322.158	293.271	273.242	279.617	300.199	221.765	291.231	88.0409	86.131	61.4724	67.7244	75.3872	72.5863	0	0	0	0	0	0	0	0	0	0	0	0	211.182
662	P30085	CMPK1	UMP-CMP kinase OS=Homo sapiens OX=9606 GN=CMPK1 PE=1 SV=3					4	0	0	0	0	0	0	0	0	0	0	166.975	184.478	167.07	173.279	1032.21	152.67	0	0	0	0	0	0	0	0	0	0	0	0	0	0	0	0	0	0	0	0	0	0	0	0	0
663	Q9BQ75	CMSS1	Protein CMSS1 OS=Homo sapiens OX=9606 GN=CMSS1 PE=1 SV=2					0	1	0	0	1	1	1	0	1	1	1	0	0	0	0	0	0	104.615	112.399	106.519	106.085	144.527	105.709	0	0	0	0	0	0	0	0	0	0	0	0	173.331	175.949	200.054	179.197	201.391	194.582	272.029
664	Q8N1G2	CMTR1	Cap-specific mRNA (nucleoside-2'-O-)-methyltransferase 1 OS=Homo sapiens OX=9606 GN=CMTR1 PE=1 SV=1					1	0	0	0	0	0	0	0	0	0	0	54.9813	55.427	54.7606	66.0111	19.583	53.7942	0	0	0	0	0	0	0	0	0	0	0	0	0	0	0	0	0	0	0	0	0	0	0	0	0
665	Q96KP4	CNDP2	Cytosolic non-specific dipeptidase OS=Homo sapiens OX=9606 GN=CNDP2 PE=1 SV=2					2	0	2	0	0	0	0	0	0	0	0	176.973	181.186	196.32	218.904	258.519	201.93	0	0	0	0	0	0	341.707	342.841	341.43	387.217	389.09	354.844	0	0	0	0	0	0	0	0	0	0	0	0	0
666	Q9P003	CNIH4	Protein cornichon homolog 4 OS=Homo sapiens OX=9606 GN=CNIH4 PE=1 SV=1					0	0	1	1	1	1	0	2	0	0	0	0	0	0	0	0	0	0	0	0	0	0	0	26.9949	34.6003	24.3234	43.8993	36.7831	48.9265	33.0725	33.0433	34.9824	55.9063	53.5906	54.6739	21.3101	29.8448	32.9645	41.45	49.1311	32.2012	75.6509
667	Q99439	CNN2	Calponin-2 OS=Homo sapiens OX=9606 GN=CNN2 PE=1 SV=4					2	2	3	2	3	1	1	2	2	2	1	156.457	144.13	168.082	192.023	135.35	153.768	142.218	133.238	152.461	137.384	36.2167	137.932	318.745	341.054	322.314	323.593	384.401	362.047	199.245	206.453	217.215	239.517	301.387	241.2	227.434	229.588	276.188	234.066	303.264	274.348	154.59
668	Q15417	CNN3	Calponin-3 OS=Homo sapiens OX=9606 GN=CNN3 PE=1 SV=1					1	1	1	1	1	1	1	1	1	0	0	11.0325	13.3609	10.7901	11.4427	18.2636	12.0785	36.7319	40.5374	44.1108	42.7837	52.6882	45.4834	39.7961	40.0214	45.1528	38.4829	51.4696	48.7248	46.1208	42.502	46.9884	42.9995	56.4216	45.0718	70.0212	72.0523	85.5471	66.004	83.2616	73.4566	111.598
669	A5YKK6	CNOT1	CCR4-NOT transcription complex subunit 1 OS=Homo sapiens OX=9606 GN=CNOT1 PE=1 SV=2					1	5	3	2	1	1	0	1	2	1	0	18.8072	20.9231	17.3812	19.1567	29.2325	15.488	231.472	195.18	207.578	241.826	134.442	233.976	206.651	184.77	184.524	217.819	198.899	218.373	64.8362	62.9512	71.4553	80.85	78.718	77.1788	59.0131	56.4377	62.5904	66.4802	59.8969	66.9565	15.0557
670	Q9H9A5	CNOT10	CCR4-NOT transcription complex subunit 10 OS=Homo sapiens OX=9606 GN=CNOT10 PE=1 SV=1					0	3	2	1	1	0	1	1	1	0	1	0	0	0	0	0	0	580.821	529.395	519.454	572.302	722.806	516.834	392.795	387.098	378.601	444.273	383.572	396.421	31.8132	27.9182	27.7369	28.1982	34.056	36.8404	214.319	219.243	262.343	258.564	250.372	248.043	0
671	Q9UKZ1	CNOT11	CCR4-NOT transcription complex subunit 11 OS=Homo sapiens OX=9606 GN=CNOT11 PE=1 SV=1					0	2	1	1	2	1	1	1	0	0	0	0	0	0	0	0	0	79.7218	80.2902	64.861	83.4424	31.249	79.8234	31.0041	21.9361	18.786	26.605	24.7251	33.3043	76.5812	79.3031	73.7842	84.4685	99.0258	100.73	137.672	155.355	174.332	176.301	179.237	175.732	49.6073
672	Q9ULM6	CNOT6	CCR4-NOT transcription complex subunit 6 OS=Homo sapiens OX=9606 GN=CNOT6 PE=1 SV=2					0	1	1	1	0	0	0	0	0	0	0	0	0	0	0	0	0	54.6052	52.7468	59.5771	68.4741	63.0395	56.5458	133.239	112.662	114.401	130.368	124.728	126.807	65.6531	64.4178	60.5646	74.0396	79.3353	82.6267	0	0	0	0	0	0	0
673	Q9UIV1	CNOT7	CCR4-NOT transcription complex subunit 7 OS=Homo sapiens OX=9606 GN=CNOT7 PE=1 SV=3					0	4	3	3	0	1	1	1	0	1	1	0	0	0	0	0	0	422.813	363.846	378.714	391.437	112.619	379.196	231.458	222.754	155.184	220.905	209.229	228.432	259.568	269.593	256.651	316.555	326.206	345.583	0	0	0	0	0	0	55.8575
674	Q92600	CNOT9	CCR4-NOT transcription complex subunit 9 OS=Homo sapiens OX=9606 GN=CNOT9 PE=1 SV=1					0	2	2	0	0	0	1	0	0	0	0	0	0	0	0	0	0	162.947	172.75	149.672	205.472	150.531	208.692	256.858	235.872	190.834	324.513	289.152	319.038	0	0	0	0	0	0	0	0	0	0	0	0	0
675	P09543	CNP	2',3'-cyclic-nucleotide 3'-phosphodiesterase OS=Homo sapiens OX=9606 GN=CNP PE=1 SV=2					1	3	4	4	4	2	3	3	1	2	2	58.9299	58.434	56.839	66.7444	21.3918	58.2881	154.638	163.451	146.565	188.627	109.416	172.577	238.913	210.975	210.027	249.737	226.468	228.075	100.11	100.643	113.163	123.508	133.813	114.145	284.487	251.328	274.225	311.117	281.848	285.474	214.516
676	Q9Y2B0	CNPY2	Protein canopy homolog 2 OS=Homo sapiens OX=9606 GN=CNPY2 PE=1 SV=1					1	1	1	0	0	0	0	0	0	0	0	84.6301	77.4574	84.6043	90.8569	96.705	80.2693	94.7227	87.8054	86.7751	90.6662	109.288	86.5385	49.2626	49.5547	56.3647	52.1685	60.283	52.2359	0	0	0	0	0	0	0	0	0	0	0	0	0
677	Q9BT09	CNPY3	Protein canopy homolog 3 OS=Homo sapiens OX=9606 GN=CNPY3 PE=1 SV=1					3	0	0	0	0	0	0	0	0	0	0	168.109	176.246	157.649	176.446	241.513	153.58	0	0	0	0	0	0	0	0	0	0	0	0	0	0	0	0	0	0	0	0	0	0	0	0	0
678	Q9GZY4	COA1	Cytochrome c oxidase assembly factor 1 homolog OS=Homo sapiens OX=9606 GN=COA1 PE=1 SV=1					0	0	1	0	0	0	0	0	0	0	0	0	0	0	0	0	0	0	0	0	0	0	0	46.7435	47.8296	45.5875	53.7072	53.5258	52.3124	0	0	0	0	0	0	0	0	0	0	0	0	0
679	Q9NYJ1	COA4	Cytochrome c oxidase assembly factor 4 homolog, mitochondrial OS=Homo sapiens OX=9606 GN=COA4 PE=1 SV=2					1	0	0	0	0	0	0	0	0	0	0	16.8056	26.0616	21.8102	25.883	9.78687	22.0548	0	0	0	0	0	0	0	0	0	0	0	0	0	0	0	0	0	0	0	0	0	0	0	0	0
680	Q96BR5	COA7	Cytochrome c oxidase assembly factor 7 OS=Homo sapiens OX=9606 GN=COA7 PE=1 SV=2					1	0	0	0	0	0	0	0	0	0	0	14.5422	19.0079	21.3221	18.7012	23.5329	13.7529	0	0	0	0	0	0	0	0	0	0	0	0	0	0	0	0	0	0	0	0	0	0	0	0	0
681	Q13057	COASY	Bifunctional coenzyme A synthase OS=Homo sapiens OX=9606 GN=COASY PE=1 SV=4					2	0	0	0	0	0	0	0	0	0	0	209.573	196.974	198.914	214.909	299.244	185.908	0	0	0	0	0	0	0	0	0	0	0	0	0	0	0	0	0	0	0	0	0	0	0	0	0
682	Q8WTW3	COG1	Conserved oligomeric Golgi complex subunit 1 OS=Homo sapiens OX=9606 GN=COG1 PE=1 SV=1					0	1	1	2	2	2	0	1	0	0	0	0	0	0	0	0	0	89.4901	90.5474	86.8573	97.1459	28.7014	94.7664	39.7048	43.4111	39.5163	46.5704	42.4214	36.6641	36.1971	33.5225	40.404	46.8577	42.2892	43.9489	166.608	160.223	199.865	203.004	185.933	188.242	75.6633
683	Q96JB2	COG3	Conserved oligomeric Golgi complex subunit 3 OS=Homo sapiens OX=9606 GN=COG3 PE=1 SV=3					1	0	0	1	0	0	0	0	0	0	0	31.9619	34.8316	28.6228	40.7626	18.4626	35.8619	0	0	0	0	0	0	0	0	0	0	0	0	51.3458	57.8023	56.8829	66.0438	69.3303	63.3124	0	0	0	0	0	0	0
684	Q9UP83	COG5	Conserved oligomeric Golgi complex subunit 5 OS=Homo sapiens OX=9606 GN=COG5 PE=1 SV=3					0	0	1	1	0	0	0	0	0	0	0	0	0	0	0	0	0	0	0	0	0	0	0	40.2326	35.1463	41.4398	40.3531	40.798	48.7466	58.5794	52.5932	66.6078	70.4661	78.3372	74.9437	0	0	0	0	0	0	0
685	P38432	COIL	Coilin OS=Homo sapiens OX=9606 GN=COIL PE=1 SV=1					0	1	1	0	1	0	1	1	1	1	1	0	0	0	0	0	0	43.8615	44.0374	37.6084	45.0674	14.1709	47.1327	114.638	110.88	111.488	97.3614	109.306	117.483	0	0	0	0	0	0	158.009	161.189	170.653	160.24	162.135	141.834	0
686	Q9Y5P4	COL4A3BP	Collagen type IV alpha-3-binding protein OS=Homo sapiens OX=9606 GN=COL4A3BP PE=1 SV=1					1	0	0	0	0	0	0	0	0	0	0	13.3932	13.5029	15.0053	10.9157	17.9987	11.7508	0	0	0	0	0	0	0	0	0	0	0	0	0	0	0	0	0	0	0	0	0	0	0	0	0
687	Q8NBJ5	COLGALT1	Procollagen galactosyltransferase 1 OS=Homo sapiens OX=9606 GN=COLGALT1 PE=1 SV=1					2	1	2	1	0	0	0	1	0	0	0	234.958	235.238	230.259	261.37	252.967	204.504	12.7371	16.4	19.1478	13.592	14.8809	15.8307	116.681	106.68	106.464	128.526	97.6661	128.831	313.131	280.031	275.094	358.978	290.918	327.534	0	0	0	0	0	0	0
688	Q86X83	COMMD2	COMM domain-containing protein 2 OS=Homo sapiens OX=9606 GN=COMMD2 PE=1 SV=2					0	0	2	0	0	0	0	0	0	0	0	0	0	0	0	0	0	0	0	0	0	0	0	37.0349	38.2547	38.7401	52.1691	40.6991	39.278	0	0	0	0	0	0	0	0	0	0	0	0	0
689	Q9H0A8	COMMD4	COMM domain-containing protein 4 OS=Homo sapiens OX=9606 GN=COMMD4 PE=1 SV=1					0	1	1	1	1	0	0	1	0	0	0	0	0	0	0	0	0	97.6537	100.612	87.5079	108.505	137.984	102.013	63.64	62.1629	49.0245	60.7705	51.1174	58.9855	198.892	227.199	194.355	248.638	244.985	222.044	130.851	162.001	173.45	194.737	172.363	166.3	0
690	Q9NX08	COMMD8	COMM domain-containing protein 8 OS=Homo sapiens OX=9606 GN=COMMD8 PE=1 SV=1					1	0	0	0	0	0	0	0	0	0	0	59.234	82.994	76.7853	66.6449	95.2044	75.8513	0	0	0	0	0	0	0	0	0	0	0	0	0	0	0	0	0	0	0	0	0	0	0	0	0
691	P21964	COMT	Catechol O-methyltransferase OS=Homo sapiens OX=9606 GN=COMT PE=1 SV=2					0	2	3	2	2	0	1	0	2	1	1	0	0	0	0	0	0	145.953	117.562	123.732	151.466	107.495	126.116	213.864	201.876	160.647	217.403	184.631	213.788	82.699	81.3735	77.5607	100.128	99.3041	100.248	150.615	180.004	177.825	194.249	210.207	196.172	0
692	P53621	COPA	Coatomer subunit alpha OS=Homo sapiens OX=9606 GN=COPA PE=1 SV=2					2	4	3	2	2	5	6	4	3	2	5	173.069	167.694	143.524	252.73	132.697	181.402	503.028	455.855	464.682	552.695	296.951	489.595	322.654	267.983	299.136	307.596	312.161	290.199	249.9	202.243	222.926	261.102	283.745	224.409	533.75	490.011	593.081	598.812	603.335	505.893	1041.65
693	P53618	COPB1	Coatomer subunit beta OS=Homo sapiens OX=9606 GN=COPB1 PE=1 SV=3					2	3	4	6	4	3	4	3	6	4	5	74.3483	75.4778	61.3512	84.1001	24.715	62.2888	219.628	208.9	203.634	230.015	56.1076	230.16	435.737	408.998	359.962	437.823	435.413	455.036	263.027	276.951	265.463	311.438	340.688	306.001	264.834	263.942	314.559	285.025	338.809	297.458	465.186
694	P35606	COPB2	Coatomer subunit beta' OS=Homo sapiens OX=9606 GN=COPB2 PE=1 SV=2					1	6	3	4	4	3	3	3	2	3	3	15.1282	12.5639	16.857	19.876	3.03625	13.4861	274.34	249.544	254.524	268.471	85.3536	243.14	205.448	209.675	196.776	240.751	208.13	197.766	501.217	528.409	508.933	604.843	603.919	563.391	826.816	861.872	959.116	949.168	960.596	900.659	210.941
695	O14579	COPE	Coatomer subunit epsilon OS=Homo sapiens OX=9606 GN=COPE PE=1 SV=3					2	1	1	1	2	1	3	1	3	3	2	57.7258	80.8025	68.5015	82.9341	39.5765	52.4968	49.4281	42.7119	46.6787	53.6515	10.8916	57.8918	28.4837	30.244	48.6102	40.4913	33.6748	43.081	39.1078	49.3142	44.2565	58.0665	46.8845	58.0743	191.531	196.331	219.471	281.032	263.749	310.481	119.091
696	Q9Y678	COPG1	Coatomer subunit gamma-1 OS=Homo sapiens OX=9606 GN=COPG1 PE=1 SV=1					2	4	2	4	4	3	3	3	3	5	3	66.1117	78.338	64.1013	74.7975	62.6214	69.2102	133.774	125.603	125.052	135.429	51.9501	133.607	88.6693	87.5366	66.9533	78.83	78.9161	89.1353	293.297	217.221	548.443	542.555	480.635	356.233	507.839	481.293	685.267	798.849	679.024	588.031	184.693
697	Q9UBF2	COPG2	Coatomer subunit gamma-2 OS=Homo sapiens OX=9606 GN=COPG2 PE=1 SV=1					1	1	3	2	1	1	1	1	2	1	0	564.124	506.487	501.196	628.517	720.014	461.196	189.975	165.393	176.263	189.229	244.137	167.292	877.19	788.039	754.066	885.451	813.153	794.6	814.535	867.339	845.427	1079.53	1087.64	975.577	542.253	505.054	620.456	685.146	654.383	610.843	813.961
698	P61201	COPS2	COP9 signalosome complex subunit 2 OS=Homo sapiens OX=9606 GN=COPS2 PE=1 SV=1					1	6	4	2	3	4	2	3	2	2	2	399.913	396.241	414.051	472.022	21.5539	316.353	535.333	475.174	502.697	534.812	742.524	545.477	538.477	516.747	477.892	535.894	536.749	543.417	542.256	503.435	580.873	592.886	610.035	593.568	906.396	917.638	1119.52	921.581	1019.44	1003.63	800.701
699	Q9UNS2	COPS3	COP9 signalosome complex subunit 3 OS=Homo sapiens OX=9606 GN=COPS3 PE=1 SV=3					2	2	4	1	1	1	0	0	0	0	0	45.4758	67.1478	61.1898	66.9967	78.4597	56.5395	196.087	208.733	195.644	227.987	257.687	259.677	260.746	232.428	258.751	303.474	288.138	318.282	41.4437	40.9903	42.1282	45.0214	48.6849	50.9259	68.2917	68.6785	82.6102	70.0465	83.3814	84.3275	80.6501
700	Q9BT78	COPS4	COP9 signalosome complex subunit 4 OS=Homo sapiens OX=9606 GN=COPS4 PE=1 SV=1					2	4	0	4	0	0	0	1	0	0	0	213.504	218.474	218.256	225.912	253.825	169.77	256.816	253.332	243.476	281.331	536.864	313.5	0	0	0	0	0	0	150.192	157.594	173.364	172.835	183.175	189.817	0	0	0	0	0	0	0
701	Q92905	COPS5	COP9 signalosome complex subunit 5 OS=Homo sapiens OX=9606 GN=COPS5 PE=1 SV=4					2	2	3	1	1	0	2	0	0	0	0	35.0323	33.2045	29.8748	32.9894	48.964	23.2716	222.933	215.635	206.117	260.793	331.124	272.72	257.153	256.474	209.378	309.112	294.299	308.572	14.6111	17.2382	12.9096	14.2112	20.6098	21.5413	107.502	129.821	125.542	146.664	146.085	153.799	0
702	Q7L5N1	COPS6	COP9 signalosome complex subunit 6 OS=Homo sapiens OX=9606 GN=COPS6 PE=1 SV=1					4	3	1	1	0	0	0	1	0	0	0	199.988	204.966	207.451	220.582	215.244	181.908	297.978	284.774	284.275	327.205	203.465	342.601	35.7946	29.2215	37.0375	45.5941	39.4746	41.2378	28.7932	35.3517	33.4844	38.57	44.5147	41.2459	0	0	0	0	0	0	0
703	Q9UBW8	COPS7A	COP9 signalosome complex subunit 7a OS=Homo sapiens OX=9606 GN=COPS7A PE=1 SV=1					0	1	0	0	0	0	0	0	0	0	0	0	0	0	0	0	0	21.4493	21.4107	20.7814	24.5825	9.13049	23.1504	0	0	0	0	0	0	0	0	0	0	0	0	0	0	0	0	0	0	0
704	Q99627	COPS8	COP9 signalosome complex subunit 8 OS=Homo sapiens OX=9606 GN=COPS8 PE=1 SV=1					1	3	3	1	3	2	0	0	0	0	0	24.0344	32.8167	28.3406	30.5942	26.8739	24.296	283.948	300.47	330.742	384.83	194.939	417.749	149.781	138.63	160.721	184.672	188.16	193.488	121.228	93.647	125.176	122.952	147.705	133.637	295.783	268.439	357.776	293.193	334.822	321.358	241.109
705	P61923	COPZ1	Coatomer subunit zeta-1 OS=Homo sapiens OX=9606 GN=COPZ1 PE=1 SV=1					2	3	4	3	2	3	1	2	2	0	1	61.6349	65.7989	50.6384	61.305	137.737	58.702	379.015	404.13	380.911	393.609	338.255	426.428	221.175	218.133	205.731	235.113	236.335	223.581	309.617	278.661	323.396	330.809	363.528	298.826	346.264	379.433	401.666	359.886	403.428	352.109	136.97
706	Q8NI60	COQ8A	Atypical kinase COQ8A, mitochondrial OS=Homo sapiens OX=9606 GN=COQ8A PE=1 SV=1				Kinase	0	0	1	0	1	0	0	0	1	0	0	0	0	0	0	0	0	0	0	0	0	0	0	86.3481	79.4799	55.1365	85.8442	76.2789	80.6709	0	0	0	0	0	0	34.305	29.6631	32.1449	41.5869	39.1163	39.5199	0
707	Q96D53	COQ8B	Atypical kinase COQ8B, mitochondrial OS=Homo sapiens OX=9606 GN=COQ8B PE=1 SV=2				Kinase	0	0	1	1	1	0	1	2	1	2	1	0	0	0	0	0	0	0	0	0	0	0	0	92.1559	80.5393	85.9027	99.5154	95.0459	92.2069	44.7788	40.2165	50.1362	60.7421	64.3816	61.1552	69.2886	66.2308	61.5855	60.7598	60.2497	67.4648	0
708	Q9BR76	CORO1B	Coronin-1B OS=Homo sapiens OX=9606 GN=CORO1B PE=1 SV=1					4	0	0	2	0	1	0	0	0	0	0	122.687	129.16	126.417	151.531	22.2258	171.684	0	0	0	0	0	0	0	0	0	0	0	0	59.9785	72.6481	76.322	70.5189	80.8682	75.3426	0	0	0	0	0	0	29.8924
709	Q9ULV4	CORO1C	Coronin-1C OS=Homo sapiens OX=9606 GN=CORO1C PE=1 SV=1					1	3	4	0	2	1	0	0	0	0	0	75.58	78.9665	83.4636	101.918	118.331	104.949	57.7674	70.9033	64.2432	61.4429	42.008	76.4947	185.678	175.161	209.833	198.363	182.787	202.894	0	0	0	0	0	0	106.029	97.4401	108.383	124.723	106.034	124.445	38.3825
710	Q14019	COTL1	Coactosin-like protein OS=Homo sapiens OX=9606 GN=COTL1 PE=1 SV=3					4	4	4	2	1	1	0	0	0	0	0	232.396	252.483	252.154	244.602	183.609	247.982	322.506	336.249	328.515	301.733	289.942	323.587	258.062	256.815	254.843	246.759	282.193	269.351	54.4124	52.8901	55.9706	53.0823	54.0134	57.6482	87.7237	87.6437	97.759	80.7938	93.0944	79.1526	80.0746
711	Q7KZN9	COX15	Cytochrome c oxidase assembly protein COX15 homolog OS=Homo sapiens OX=9606 GN=COX15 PE=1 SV=1					1	3	3	2	2	4	1	2	0	2	2	45.3464	54.0476	49.839	56.6965	5.46844	41.1935	230.969	227.455	232.589	242.556	450.472	220.167	194.195	205.213	171.201	219.333	212.412	205.184	146.302	166.138	158.813	182.906	196.606	195.349	176.025	247.392	244.961	252.025	264.664	271.783	409.435
712	P13073	COX4I1	Cytochrome c oxidase subunit 4 isoform 1, mitochondrial OS=Homo sapiens OX=9606 GN=COX4I1 PE=1 SV=1					3	1	2	3	2	3	0	3	3	2	4	92.4075	134.205	128.659	99.8502	120.522	92.9281	264.333	285.137	291.026	294.835	15.1245	266.242	165.712	143.633	152.571	203.867	136.793	318.778	384.421	316.433	352.209	571.659	314.956	1101.72	202.073	186.36	222.987	298.317	173.562	578.488	467.003
713	P20674	COX5A	Cytochrome c oxidase subunit 5A, mitochondrial OS=Homo sapiens OX=9606 GN=COX5A PE=1 SV=2					2	0	4	2	3	2	0	0	0	1	0	183.176	258.992	285.891	215.453	78.7463	189.892	0	0	0	0	0	0	157.175	149.206	153.181	218.989	139.242	312.735	247.771	199.026	238.702	319.468	203.722	648.363	231.79	228.489	241.584	314.526	192.474	609.688	115.063
714	P10606	COX5B	Cytochrome c oxidase subunit 5B, mitochondrial OS=Homo sapiens OX=9606 GN=COX5B PE=1 SV=2					1	2	2	2	2	1	1	2	1	1	3	23.9109	25.074	32.3912	22.6993	0	17.543	296.218	305.077	365.731	301.21	607.902	211.733	209.623	179.131	189.794	274.941	191.295	413.218	130.347	119.081	139.813	175.636	122.175	329.053	213.598	196.508	233.278	288.013	175.578	551.171	135.53
715	P09669	COX6C	Cytochrome c oxidase subunit 6C OS=Homo sapiens OX=9606 GN=COX6C PE=1 SV=2					0	0	0	1	0	0	0	0	1	0	1	0	0	0	0	0	0	0	0	0	0	0	0	0	0	0	0	0	0	23.4456	17.1073	21.4245	24.9565	19.5813	38.3968	0	0	0	0	0	0	0
716	P14406	COX7A2	Cytochrome c oxidase subunit 7A2, mitochondrial OS=Homo sapiens OX=9606 GN=COX7A2 PE=1 SV=1					1	0	1	2	0	0	0	0	0	0	0	33.8911	42.5914	45.8333	20.1683	47.3359	7.70808	0	0	0	0	0	0	51.6106	54.2641	45.1452	83.7133	41.0003	147.372	83.173	68.5047	98.0277	156.688	75.9955	376.318	0	0	0	0	0	0	0
717	P15954	COX7C	Cytochrome c oxidase subunit 7C, mitochondrial OS=Homo sapiens OX=9606 GN=COX7C PE=1 SV=1					0	0	0	0	0	0	0	0	0	0	1	0	0	0	0	0	0	0	0	0	0	0	0	0	0	0	0	0	0	0	0	0	0	0	0	0	0	0	0	0	0	0
718	P00450	CP	Ceruloplasmin OS=Homo sapiens OX=9606 GN=CP PE=1 SV=1					1	0	0	0	0	0	0	0	0	0	0	74.5946	56.8794	50.6049	87.4201	55.7963	61.684	0	0	0	0	0	0	0	0	0	0	0	0	0	0	0	0	0	0	0	0	0	0	0	0	0
719	O75976	CPD	Carboxypeptidase D OS=Homo sapiens OX=9606 GN=CPD PE=1 SV=2					1	1	0	0	0	0	0	0	0	0	0	35.9811	38.0426	27.331	40.7401	6.39845	30.4134	107.016	93.9607	100.254	99.1618	35.1961	115.454	0	0	0	0	0	0	0	0	0	0	0	0	0	0	0	0	0	0	0
720	Q99829	CPNE1	Copine-1 OS=Homo sapiens OX=9606 GN=CPNE1 PE=1 SV=1					2	4	1	1	1	2	0	0	3	0	2	80.3308	78.2173	75.8801	79.9255	7.40445	69.238	350.263	320.548	286.468	373.249	91.6799	367.473	35.1437	34.37	22.0558	29.2273	28.6782	30.9058	46.6771	48.6272	45.9059	49.7574	54.5465	51.4884	138.074	129.295	118.774	117.881	126.735	134.512	205.618
721	Q96FN4	CPNE2	Copine-2 OS=Homo sapiens OX=9606 GN=CPNE2 PE=1 SV=3					1	0	1	0	0	1	0	0	0	0	1	33.2588	35.7871	34.4696	39.7606	8.95899	29.6503	0	0	0	0	0	0	15.2193	16.692	16.0334	19.5874	17.7548	15.799	0	0	0	0	0	0	0	0	0	0	0	0	23.7855
722	O75131	CPNE3	Copine-3 OS=Homo sapiens OX=9606 GN=CPNE3 PE=1 SV=1					0	4	2	2	3	2	4	4	3	4	4	0	0	0	0	0	0	278.446	295.39	294.064	301.742	387.212	267.451	106.686	128.09	123.351	111.319	133.862	117.443	94.8489	155.158	120.92	102.78	140.164	129.34	358.643	472.732	503.419	371.062	500.825	400.542	187.72
723	P36551	CPOX	Oxygen-dependent coproporphyrinogen-III oxidase, mitochondrial OS=Homo sapiens OX=9606 GN=CPOX PE=1 SV=3					4	3	3	2	0	0	0	0	0	0	0	353.256	347.856	328.155	372.053	89.0276	323.413	339.901	336.219	327.381	341.333	38.5238	407.292	438.558	400.713	239.769	398.764	472.662	418.022	164.669	173.224	161.031	192.093	193.297	185.064	0	0	0	0	0	0	0
724	P31327	CPS1	Carbamoyl-phosphate synthase [ammonia], mitochondrial OS=Homo sapiens OX=9606 GN=CPS1 PE=1 SV=2					0	1	2	3	3	1	0	2	2	0	0	0	0	0	0	0	0	49.5988	39.4538	50.4885	49.742	59.351	47.587	155.082	125.526	124.623	140.486	132.802	134.598	391.172	360.429	362.675	449.782	431.355	406.19	352.833	332.702	367.745	366.625	363.415	351.558	89.3308
725	Q10570	CPSF1	Cleavage and polyadenylation specificity factor subunit 1 OS=Homo sapiens OX=9606 GN=CPSF1 PE=1 SV=2			E3 ligase		0	1	1	3	2	2	3	3	1	0	1	0	0	0	0	0	0	128.918	125.152	115.057	137.85	42.3536	134.856	22.2996	17.0953	16.4903	21.6581	16.1502	21.4313	246.115	179.113	230.906	316.307	273.409	267.732	48.9033	45.6574	54.4432	55.6888	53.3637	51.4439	93.1624
726	Q9P2I0	CPSF2	Cleavage and polyadenylation specificity factor subunit 2 OS=Homo sapiens OX=9606 GN=CPSF2 PE=1 SV=2					0	4	3	1	2	3	3	4	2	1	3	0	0	0	0	0	0	184.154	176.085	179.763	188.722	106.483	177.43	98.3173	89.3489	90.8221	114.801	103.656	95.6348	20.4115	18.3945	15.5266	20.1363	21.2466	26.2127	240.761	211.203	226.779	240.714	222.37	232.765	216.022
727	Q9UKF6	CPSF3	Cleavage and polyadenylation specificity factor subunit 3 OS=Homo sapiens OX=9606 GN=CPSF3 PE=1 SV=1					1	2	3	3	3	3	3	2	2	4	2	111.68	117.705	111.772	142.493	159.75	104.995	274.9	255.705	268.6	296.524	118.895	277.407	274.807	280.49	242.321	287.021	270.221	275.053	281.528	288.574	277.757	332.875	349.074	323.975	428.93	459.226	474.817	514.781	514.976	447.721	353.141
728	O95639	CPSF4	Cleavage and polyadenylation specificity factor subunit 4 OS=Homo sapiens OX=9606 GN=CPSF4 PE=1 SV=1					0	2	1	0	2	0	2	0	1	1	0	0	0	0	0	0	0	117.935	114.138	108.51	134.309	34.2808	127.542	22.3739	20.4681	24.5054	26.9035	28.2755	25.9763	0	0	0	0	0	0	74.9318	79.7269	83.8739	103.646	99.8663	96.3653	0
729	Q16630	CPSF6	Cleavage and polyadenylation specificity factor subunit 6 OS=Homo sapiens OX=9606 GN=CPSF6 PE=1 SV=2					1	0	0	0	0	0	0	0	0	0	0	23.7081	35.754	29.3011	33.4531	49.212	29.2364	0	0	0	0	0	0	0	0	0	0	0	0	0	0	0	0	0	0	0	0	0	0	0	0	0
730	Q8N684	CPSF7	Cleavage and polyadenylation specificity factor subunit 7 OS=Homo sapiens OX=9606 GN=CPSF7 PE=1 SV=1					3	0	0	0	0	0	0	0	0	0	0	343.557	334.453	315.983	373.406	448.501	314.212	0	0	0	0	0	0	0	0	0	0	0	0	0	0	0	0	0	0	0	0	0	0	0	0	0
731	P50416	CPT1A	Carnitine O-palmitoyltransferase 1, liver isoform OS=Homo sapiens OX=9606 GN=CPT1A PE=1 SV=2					1	2	2	1	2	3	3	2	3	1	2	137.262	147.405	147.406	185.814	204.14	141	149.321	133.418	137.562	148.179	156.445	136.336	406.885	359.787	305.593	420.612	376.949	370.554	97.7505	118.978	97.2587	137.134	124.569	134.943	369.357	437.949	407.222	473.538	462.252	417.875	369.672
732	P23786	CPT2	Carnitine O-palmitoyltransferase 2, mitochondrial OS=Homo sapiens OX=9606 GN=CPT2 PE=1 SV=2					2	0	0	0	0	0	0	0	0	0	0	75.2321	69.9037	57.3125	72.0904	17.8776	62.0903	0	0	0	0	0	0	0	0	0	0	0	0	0	0	0	0	0	0	0	0	0	0	0	0	0
733	Q9H3G5	CPVL	Probable serine carboxypeptidase CPVL OS=Homo sapiens OX=9606 GN=CPVL PE=1 SV=2					1	0	0	0	0	0	0	0	0	0	0	113.993	121.701	123.843	123.347	70.0112	103.633	0	0	0	0	0	0	0	0	0	0	0	0	0	0	0	0	0	0	0	0	0	0	0	0	0
734	P29373	CRABP2	Cellular retinoic acid-binding protein 2 OS=Homo sapiens OX=9606 GN=CRABP2 PE=1 SV=2					3	1	0	1	1	1	0	1	0	0	1	101.288	99.8591	93.6803	98.4626	345.881	93.7626	155.928	143.019	142.655	147.297	200.527	148.326	0	0	0	0	0	0	31.1247	30.1084	27.1521	29.5226	32.7462	28.2826	41.1151	44.7218	40.1036	39.3652	45.999	30.0404	26.457
735	P78560	CRADD	Death domain-containing protein CRADD OS=Homo sapiens OX=9606 GN=CRADD PE=1 SV=1					1	0	0	0	0	0	0	0	0	0	0	56.434	64.9984	65.8813	70.2705	31.599	58.04	0	0	0	0	0	0	0	0	0	0	0	0	0	0	0	0	0	0	0	0	0	0	0	0	0
736	Q92793	CREBBP	CREB-binding protein OS=Homo sapiens OX=9606 GN=CREBBP PE=1 SV=3					0	2	1	2	0	2	1	2	2	0	0	0	0	0	0	0	0	161.012	142.945	150.194	180.436	211.248	140.228	136.087	136.763	121.025	145.006	131.27	121.3	99.3813	110.904	119.172	127.629	124.453	114.075	0	0	0	0	0	0	326.526
737	P50238	CRIP1	Cysteine-rich protein 1 OS=Homo sapiens OX=9606 GN=CRIP1 PE=1 SV=3					1	1	1	0	0	0	0	0	0	0	0	54.9904	58.5654	59.2866	62.6185	15.1222	66.6525	48.2761	48.4096	54.8151	51.8327	20.2706	60.9276	24.2899	23.2949	21.0437	21.6143	36.3776	25.7319	0	0	0	0	0	0	0	0	0	0	0	0	0
738	Q9P021	CRIPT	Cysteine-rich PDZ-binding protein OS=Homo sapiens OX=9606 GN=CRIPT PE=1 SV=1					1	0	0	0	0	0	0	0	0	0	0	43.7258	44.2913	37.6647	42.0248	56.9153	32.3951	0	0	0	0	0	0	0	0	0	0	0	0	0	0	0	0	0	0	0	0	0	0	0	0	0
739	P46108	CRK	Adapter molecule crk OS=Homo sapiens OX=9606 GN=CRK PE=1 SV=2					3	0	1	0	0	0	0	0	0	0	0	88.0716	76.9423	88.7443	94.5243	32.3624	83.7013	0	0	0	0	0	0	121.176	106.017	120.03	114.878	130.803	131.912	0	0	0	0	0	0	0	0	0	0	0	0	0
740	P46109	CRKL	Crk-like protein OS=Homo sapiens OX=9606 GN=CRKL PE=1 SV=1					4	3	1	0	0	0	0	0	0	0	0	408.273	396.436	387.345	424.008	542.826	368.59	227.4	244.043	241.355	235.53	282.819	279.61	124.44	128.429	139.056	137.756	155.701	155.131	0	0	0	0	0	0	0	0	0	0	0	0	0
741	Q9BZJ0	CRNKL1	Crooked neck-like protein 1 OS=Homo sapiens OX=9606 GN=CRNKL1 PE=1 SV=4					0	2	2	4	2	1	2	1	3	4	0	0	0	0	0	0	0	311.428	298.998	320.97	321.468	81.4023	287.137	84.7961	73.2514	70.126	86.5901	83.393	68.6798	145.146	168.569	167.728	181.751	209.479	158.62	44.782	50.6323	56.681	49.2898	59.7826	45.9528	307.836
742	Q5TZA2	CROCC	Rootletin OS=Homo sapiens OX=9606 GN=CROCC PE=1 SV=1					1	1	0	0	0	0	0	0	0	0	0	236.93	273.958	247.876	273.1	49.8385	262.448	152.096	148.494	147.998	158.898	47.5922	167.195	0	0	0	0	0	0	0	0	0	0	0	0	0	0	0	0	0	0	0
743	O75718	CRTAP	Cartilage-associated protein OS=Homo sapiens OX=9606 GN=CRTAP PE=1 SV=1					2	2	1	0	0	0	0	1	1	1	2	133.912	133.345	134.136	150.942	85.1495	118.06	59.4928	50.9254	52.8976	56.6823	73.0691	58.9071	97.3257	111.521	35.901	90.4281	75.2302	101.872	0	0	0	0	0	0	0	0	0	0	0	0	0
744	Q08257	CRYZ	Quinone oxidoreductase OS=Homo sapiens OX=9606 GN=CRYZ PE=1 SV=1					1	0	0	0	0	0	0	0	0	0	0	69.7414	74.9751	71.7311	75.9649	10.2509	83.2969	0	0	0	0	0	0	0	0	0	0	0	0	0	0	0	0	0	0	0	0	0	0	0	0	0
745	O75390	CS	Citrate synthase, mitochondrial OS=Homo sapiens OX=9606 GN=CS PE=1 SV=2					2	2	4	0	1	0	0	0	0	0	0	223.755	229.902	238.629	248.231	327.569	245.902	307.148	338.776	274.622	320.963	308.778	400.359	605.242	570.602	527.224	631.817	617.265	584.886	0	0	0	0	0	0	215.104	233.178	247.633	244.77	234.645	237.131	0
746	O75534	CSDE1	Cold shock domain-containing protein E1 OS=Homo sapiens OX=9606 GN=CSDE1 PE=1 SV=2					3	6	2	4	3	2	4	4	4	2	6	233.544	237.356	240.122	276.009	47.0064	235.557	303.979	309.336	305.74	325.21	416.958	334.86	182.873	199.703	197.035	200.927	216.947	192.445	448.267	505.645	493.087	487.861	517.877	474.19	323.723	333.331	388.684	346.849	389.393	358.622	260.612
747	P55060	CSE1L	Exportin-2 OS=Homo sapiens OX=9606 GN=CSE1L PE=1 SV=3					1	4	3	4	4	3	3	3	3	4	3	26.1507	21.5529	19.9045	23.4867	4.30012	22.3263	165.99	162.194	160.579	162.744	162.711	170.615	181.611	182.856	174.374	198.18	192.807	203.707	200.087	176.729	197.34	214.79	241.302	237.492	186.757	182.127	190.223	177.002	228.303	231.098	286.318
748	P41240	CSK	Tyrosine-protein kinase CSK OS=Homo sapiens OX=9606 GN=CSK PE=1 SV=1				Kinase	1	1	2	1	1	1	0	0	0	0	1	215.248	209.302	191.703	229.216	23.8363	217.861	62.4665	59.5396	52.2754	59.2809	16.2637	63.557	107.135	111.791	102.574	99.7299	109.696	94.2995	112.729	134.754	143.596	132.629	175.76	160.103	61.3075	75.1134	83.7014	68.2775	86.4602	81.1037	40.5732
749	P48729	CSNK1A1	Casein kinase I isoform alpha OS=Homo sapiens OX=9606 GN=CSNK1A1 PE=1 SV=2				Kinase	3	2	3	2	3	1	2	1	1	0	1	244.99	284.988	279.938	309.869	120.346	250.745	276.133	243.228	240.996	322.587	123.685	312.173	309.736	264.458	226.244	314.144	276.952	284.834	369.159	353.461	361.04	403.817	358.87	388.718	569.936	561.168	549.819	653.385	539.895	603.799	230.838
750	P48730	CSNK1D	Casein kinase I isoform delta OS=Homo sapiens OX=9606 GN=CSNK1D PE=1 SV=2				Kinase	0	1	0	0	0	0	0	0	0	0	0	0	0	0	0	0	0	46.8606	45.5658	43.1909	46.3822	10.714	51.7707	0	0	0	0	0	0	0	0	0	0	0	0	0	0	0	0	0	0	0
751	P68400	CSNK2A1	Casein kinase II subunit alpha OS=Homo sapiens OX=9606 GN=CSNK2A1 PE=1 SV=1				Kinase	2	5	5	5	6	4	5	5	6	5	2	214.632	256.528	245.198	315.607	27.7992	225.718	929.45	867.805	876.737	1098.42	358.473	1102.6	446.916	426.509	384.372	467.418	452.209	452.852	287.624	303.237	289.384	305.621	323.573	274.247	299.304	346.223	332.908	353.792	362.981	322.33	409.028
752	P19784	CSNK2A2	Casein kinase II subunit alpha' OS=Homo sapiens OX=9606 GN=CSNK2A2 PE=1 SV=1				Kinase	0	3	4	5	2	3	2	0	3	3	2	0	0	0	0	0	0	192.545	213.429	204.759	267.304	187.334	266.035	319.285	335.881	278.935	389.22	349.384	327.824	277.564	274.077	302.591	308.883	337.543	279.907	109.581	137.295	131.197	152.679	164.572	130.223	123.517
753	P67870	CSNK2B	Casein kinase II subunit beta OS=Homo sapiens OX=9606 GN=CSNK2B PE=1 SV=1					2	4	4	3	1	4	1	2	2	1	1	81.0384	90.9943	84.5798	111.596	36.0442	83.4516	240.764	233.932	228.069	261.035	1047.52	233.218	243.467	221.305	219.324	233.849	240.369	230.984	206.564	213.161	216.806	238.503	245.353	223.094	129.254	131.812	131.847	127.607	134.615	131.913	294.764
754	P04080	CSTB	Cystatin-B OS=Homo sapiens OX=9606 GN=CSTB PE=1 SV=2					2	2	2	1	1	0	0	0	0	0	0	155.803	278.259	269.953	215.165	67.1284	271.151	154.871	152.933	167.558	166.847	89.1068	208.504	205.229	232.346	188.031	239.022	296.922	260.004	92.3196	118.964	119.911	104.893	133.595	122.849	70.4676	105.282	101.17	85.2832	101.577	103.028	0
755	Q05048	CSTF1	Cleavage stimulation factor subunit 1 OS=Homo sapiens OX=9606 GN=CSTF1 PE=1 SV=1					0	1	2	1	0	0	2	2	1	0	1	0	0	0	0	0	0	86.3014	93.003	93.7918	80.9909	77.6647	76.6652	36.5198	44.0853	35.6177	31.6092	37.1002	25.3836	36.2086	48.5961	41.7599	37.5923	43.6857	35.0854	0	0	0	0	0	0	0
756	P33240	CSTF2	Cleavage stimulation factor subunit 2 OS=Homo sapiens OX=9606 GN=CSTF2 PE=1 SV=1					2	2	0	0	0	0	0	0	0	0	0	120.064	127	109.631	121.302	49.6184	101.779	43.1994	37.5895	48.1869	41.1406	60.3379	44.6563	0	0	0	0	0	0	0	0	0	0	0	0	0	0	0	0	0	0	0
757	Q9H0L4	CSTF2T	Cleavage stimulation factor subunit 2 tau variant OS=Homo sapiens OX=9606 GN=CSTF2T PE=1 SV=1					3	0	1	2	0	0	0	0	0	0	0	142.95	144.752	131.95	150.279	30.0187	137.554	0	0	0	0	0	0	49.205	41.6388	40.6227	46.5385	43.1968	43.8316	125.245	123.527	117.272	150.868	141.816	148.227	0	0	0	0	0	0	0
758	Q12996	CSTF3	Cleavage stimulation factor subunit 3 OS=Homo sapiens OX=9606 GN=CSTF3 PE=1 SV=1					4	0	1	1	1	0	0	0	0	0	0	408.685	419.07	392.114	427.387	520.795	371.929	0	0	0	0	0	0	91.1112	93.0822	95.2559	111.384	89.6566	113.053	159.604	142.469	139.398	194.04	184.001	205.661	72.8445	69.4076	77.975	88.6333	75.3007	90.9973	0
759	Q13363	CTBP1	C-terminal-binding protein 1 OS=Homo sapiens OX=9606 GN=CTBP1 PE=1 SV=2					2	3	2	1	1	1	3	1	1	1	2	97.5123	102.473	100.505	116.274	49.1392	102.219	172.492	154.331	153.622	171.983	63.8424	153.367	92.7856	95.794	92.6381	99.5434	104.357	92.2909	74.6925	83.9448	79.7864	88.0546	105.103	77.7665	34.7801	33.4649	40.6195	34.8515	40.6131	40.2354	42.739
760	P56545	CTBP2	C-terminal-binding protein 2 OS=Homo sapiens OX=9606 GN=CTBP2 PE=1 SV=1					0	4	4	3	4	3	2	3	3	2	2	0	0	0	0	0	0	259.933	259.346	249.882	265.593	97.0802	255.199	339.581	310.628	295.671	348.928	320.749	309.703	144.754	158.325	152.57	179.923	177.685	166.896	188.545	207.727	230.951	238.995	234.676	221.597	304.703
761	P49711	CTCF	Transcriptional repressor CTCF OS=Homo sapiens OX=9606 GN=CTCF PE=1 SV=1					0	0	0	1	0	0	1	0	0	0	0	0	0	0	0	0	0	0	0	0	0	0	0	0	0	0	0	0	0	28.3419	28.5362	27.259	20.6083	19.3595	23.9101	0	0	0	0	0	0	0
762	Q9Y5B0	CTDP1	RNA polymerase II subunit A C-terminal domain phosphatase OS=Homo sapiens OX=9606 GN=CTDP1 PE=1 SV=3				Phosphatase	0	1	1	0	0	0	0	0	0	0	0	0	0	0	0	0	0	66.9104	60.8158	63.9824	69.3296	13.6029	64.4227	174.971	162.742	144.914	176.247	178.208	170.489	0	0	0	0	0	0	0	0	0	0	0	0	0
763	P35221	CTNNA1	Catenin alpha-1 OS=Homo sapiens OX=9606 GN=CTNNA1 PE=1 SV=1					2	4	5	3	3	3	4	3	2	1	1	69.6477	70.7673	63.7872	74.7739	89.3505	65.5193	238.07	217.479	228.901	209.761	260.215	223.666	474.179	451.577	467.234	473.999	473.076	436.663	243.154	227.573	245.239	259.531	286.723	248.253	300.897	303.035	338.206	286.458	303.508	286.318	127.711
764	P26232	CTNNA2	Catenin alpha-2 OS=Homo sapiens OX=9606 GN=CTNNA2 PE=1 SV=5					0	1	1	1	0	1	1	1	0	0	0	0	0	0	0	0	0	49.7569	55.4917	55.5802	48.8374	85.4147	49.5333	39.1238	39.1052	35.7716	39.4219	38.5174	37.6806	21.9143	18.0808	20.0869	21.7297	18.9641	23.8922	0	0	0	0	0	0	58.8913
765	Q9UBT7	CTNNAL1	Alpha-catulin OS=Homo sapiens OX=9606 GN=CTNNAL1 PE=1 SV=2					1	0	1	0	0	0	0	0	0	0	0	36.2503	34.2655	38.7605	39.9985	7.87483	35.3181	0	0	0	0	0	0	55.3662	54.3917	68.1751	64.339	65.1946	54.1668	0	0	0	0	0	0	0	0	0	0	0	0	0
766	P35222	CTNNB1	Catenin beta-1 OS=Homo sapiens OX=9606 GN=CTNNB1 PE=1 SV=1					2	1	1	2	3	3	0	4	5	2	3	92.4958	88.8494	83.6854	100.367	99.0652	81.3215	64.6125	62.4838	59.2151	66.5036	78.2253	51.1113	49.7506	42.1015	45.3667	40.3353	47.0476	43.3861	306.119	303.586	302.15	351.571	350.554	307.2	138.052	134.56	145.534	129.427	140.062	121.264	247.78
767	Q8WYA6	CTNNBL1	Beta-catenin-like protein 1 OS=Homo sapiens OX=9606 GN=CTNNBL1 PE=1 SV=1					3	2	2	1	3	3	2	1	1	0	2	470.084	468.077	447.037	507.764	47.5425	455.999	273.802	264.583	242.74	294.244	15.379	287.434	35.152	31.0316	28.7365	26.4468	27.3453	26.1306	160.889	137.668	136.422	153.804	175.14	187.92	179.242	183.706	184.411	178.54	181.019	180.831	533.597
768	O60716	CTNND1	Catenin delta-1 OS=Homo sapiens OX=9606 GN=CTNND1 PE=1 SV=1					1	3	2	4	5	5	5	3	4	5	3	52.8099	56.4191	56.1639	74.5443	16.0556	52.3551	223.688	197.326	229.481	276.498	102.741	225.795	131.111	112.644	114.213	148.264	128.233	128.67	194.059	167.358	184.295	229.443	231.701	231.98	422.263	384.103	437.584	456.33	437.32	446.24	389.107
769	P17812	CTPS1	CTP synthase 1 OS=Homo sapiens OX=9606 GN=CTPS1 PE=1 SV=2					3	2	4	2	4	0	5	3	3	3	2	86.5549	77.8293	80.7305	103.117	67.7356	86.6479	164.212	170.75	164.663	168.997	93.593	156.181	277.511	250.486	276.666	305.423	248.524	257.277	193.395	212.786	226.133	251.486	219.542	179.476	267.113	265.486	308.165	306.457	288.749	271.389	0
770	Q6PD62	CTR9	RNA polymerase-associated protein CTR9 homolog OS=Homo sapiens OX=9606 GN=CTR9 PE=1 SV=1					0	1	3	2	4	4	2	2	5	0	3	0	0	0	0	0	0	43.9982	42.3514	39.7115	64.6079	19.8119	52.7458	145.42	129.974	104.361	162.334	104.386	175.237	49.3445	41.3966	38.4284	62.4405	48.9177	58.0013	222.238	209.048	208.681	290.606	184.345	305.376	362.446
771	P10619	CTSA	Lysosomal protective protein OS=Homo sapiens OX=9606 GN=CTSA PE=1 SV=2					2	1	0	0	0	0	0	0	0	0	0	147.031	154.366	138.623	159.013	211.455	137.415	62.0336	61.4047	59.0401	64.9937	83.8423	57.1667	0	0	0	0	0	0	0	0	0	0	0	0	0	0	0	0	0	0	0
772	P53634	CTSC	Dipeptidyl peptidase 1 OS=Homo sapiens OX=9606 GN=CTSC PE=1 SV=2					0	1	0	0	0	0	0	0	0	0	0	0	0	0	0	0	0	73.1234	74.072	67.0515	78.9865	111.771	80.8524	0	0	0	0	0	0	0	0	0	0	0	0	0	0	0	0	0	0	0
773	Q14247	CTTN	Src substrate cortactin OS=Homo sapiens OX=9606 GN=CTTN PE=1 SV=2					1	0	0	1	0	1	0	0	0	0	0	14.9294	19.2495	12.689	16.8887	23.7633	16.8298	0	0	0	0	0	0	0	0	0	0	0	0	30.4928	27.3575	26.4428	30.9691	28.5313	24.0288	0	0	0	0	0	0	30.1616
774	Q7Z7A3	CTU1	Cytoplasmic tRNA 2-thiolation protein 1 OS=Homo sapiens OX=9606 GN=CTU1 PE=1 SV=1					0	1	0	0	0	0	2	1	1	1	0	0	0	0	0	0	0	114.965	116.557	119.388	138.015	5.83758	123.821	0	0	0	0	0	0	0	0	0	0	0	0	0	0	0	0	0	0	0
775	Q2VPK5	CTU2	Cytoplasmic tRNA 2-thiolation protein 2 OS=Homo sapiens OX=9606 GN=CTU2 PE=1 SV=1					1	1	4	4	2	2	0	1	2	1	0	66.0928	65.0776	59.893	82.5196	21.7006	70.602	141.783	131.24	128.977	159.273	50.732	145.051	140.957	134.979	123.094	135.259	135.453	129.966	187.469	171.841	185.739	215.103	216.948	201.972	93.8007	95.6204	96.1124	94.9628	104.257	96.1503	149.367
776	Q13616	CUL1	Cullin-1 OS=Homo sapiens OX=9606 GN=CUL1 PE=1 SV=2					3	2	1	2	1	2	2	3	1	3	1	225.164	215.933	212.512	240.397	293.691	199.222	79.0681	71.9411	66.4839	72.5346	34.8865	76.0822	28.9417	27.7711	24.9262	29.8363	26.8359	29.7358	146.393	146.178	145.995	168.182	158.661	168.939	28.1031	36.1633	35.0524	32.498	36.393	37.7072	95.0623
777	Q13617	CUL2	Cullin-2 OS=Homo sapiens OX=9606 GN=CUL2 PE=1 SV=2					1	3	3	1	0	0	0	0	0	0	0	20.868	17.7595	17.137	22.0261	3.07363	14.5748	220.792	205.804	193.321	229.804	161.734	217.303	402.899	378.381	327.679	416.474	395.729	396.465	49.4686	46.5219	53.2084	55.3036	49.9594	55.3826	0	0	0	0	0	0	0
778	Q13618	CUL3	Cullin-3 OS=Homo sapiens OX=9606 GN=CUL3 PE=1 SV=2					1	3	1	0	0	1	2	1	1	2	0	130.726	131.568	127.621	139.375	5.09019	129.112	216.888	221.845	199.367	233.243	61.2345	256.331	169.564	153.122	118.631	177.493	160.655	137.517	0	0	0	0	0	0	0	0	0	0	0	0	155.061
779	Q13619	CUL4A	Cullin-4A OS=Homo sapiens OX=9606 GN=CUL4A PE=1 SV=3					2	1	3	1	0	1	1	0	0	0	0	39.3211	41.5685	38.0019	43.0205	38.1111	33.2588	94.7954	92.2024	92.5774	86.5957	12.3465	92.8966	73.7198	63.7026	61.1347	60.5928	64.2834	70.3291	26.888	23.037	22.7439	30.7438	26.723	25.3449	0	0	0	0	0	0	33.8621
780	Q13620	CUL4B	Cullin-4B OS=Homo sapiens OX=9606 GN=CUL4B PE=1 SV=4					3	1	1	0	0	0	0	0	0	0	0	70.5314	66.6837	64.3764	67.6047	26.0295	71.9504	80.9538	70.7006	77.1617	76.5786	97.9175	73.6683	40.8217	41.5014	24.4588	40.2819	39.8268	35.3873	0	0	0	0	0	0	0	0	0	0	0	0	0
781	Q93034	CUL5	Cullin-5 OS=Homo sapiens OX=9606 GN=CUL5 PE=1 SV=4					2	1	2	1	0	3	0	0	0	1	0	352.73	336.869	312.67	395.848	104.788	331.942	110.205	103.437	105.364	115.177	4.09834	109.579	262.974	238.524	208.2	235.502	240.68	246.13	35.648	34.3758	31.2607	42.7257	43.0965	39.0943	0	0	0	0	0	0	531.468
782	Q8IWT3	CUL9	Cullin-9 OS=Homo sapiens OX=9606 GN=CUL9 PE=1 SV=2			E3 ligase		0	0	0	0	0	0	0	0	1	0	0	0	0	0	0	0	0	0	0	0	0	0	0	0	0	0	0	0	0	0	0	0	0	0	0	0	0	0	0	0	0	0
783	Q96C57	CUSTOS	Protein CUSTOS OS=Homo sapiens OX=9606 GN=CUSTOS PE=1 SV=2					1	0	0	0	0	0	0	0	0	0	0	57.4215	62.616	55.3991	47.0907	66.2841	45.8843	0	0	0	0	0	0	0	0	0	0	0	0	0	0	0	0	0	0	0	0	0	0	0	0	0
784	O60888	CUTA	Protein CutA OS=Homo sapiens OX=9606 GN=CUTA PE=1 SV=2					3	0	0	0	0	0	0	0	0	0	0	159.404	186.841	180.108	198.775	203.704	188.948	0	0	0	0	0	0	0	0	0	0	0	0	0	0	0	0	0	0	0	0	0	0	0	0	0
785	Q9NTM9	CUTC	Copper homeostasis protein cutC homolog OS=Homo sapiens OX=9606 GN=CUTC PE=1 SV=1					1	0	0	0	0	0	0	0	0	0	0	36.8271	43.7496	42.7154	46.339	76.0669	41.4423	0	0	0	0	0	0	0	0	0	0	0	0	0	0	0	0	0	0	0	0	0	0	0	0	0
786	Q9P013	CWC15	Spliceosome-associated protein CWC15 homolog OS=Homo sapiens OX=9606 GN=CWC15 PE=1 SV=2					1	0	0	0	0	0	0	0	0	0	0	21.2122	21.2751	20.7957	22.9783	8.2948	20.0424	0	0	0	0	0	0	0	0	0	0	0	0	0	0	0	0	0	0	0	0	0	0	0	0	0
787	Q9HCG8	CWC22	Pre-mRNA-splicing factor CWC22 homolog OS=Homo sapiens OX=9606 GN=CWC22 PE=1 SV=3					0	0	0	0	0	0	0	0	0	1	2	0	0	0	0	0	0	0	0	0	0	0	0	0	0	0	0	0	0	0	0	0	0	0	0	0	0	0	0	0	0	0
788	Q6UX04	CWC27	Spliceosome-associated protein CWC27 homolog OS=Homo sapiens OX=9606 GN=CWC27 PE=1 SV=1					2	1	0	0	0	0	0	0	0	0	0	59.9463	65.4638	54.4508	65.0403	0	62.0848	23.5267	20.5766	19.6652	30.9973	6.33763	28.5405	0	0	0	0	0	0	0	0	0	0	0	0	0	0	0	0	0	0	0
789	Q69YN2	CWF19L1	CWF19-like protein 1 OS=Homo sapiens OX=9606 GN=CWF19L1 PE=1 SV=2					4	2	0	0	0	0	0	0	0	0	0	159.778	159.964	160.951	172.102	192.112	162.52	137.491	141.772	127.286	139.069	231.032	136.791	0	0	0	0	0	0	0	0	0	0	0	0	0	0	0	0	0	0	0
790	Q9P0U4	CXXC1	CXXC-type zinc finger protein 1 OS=Homo sapiens OX=9606 GN=CXXC1 PE=1 SV=2					0	0	0	1	1	0	0	0	1	0	0	0	0	0	0	0	0	0	0	0	0	0	0	0	0	0	0	0	0	82.1057	67.2574	76.1536	87.3852	88.6396	81.6031	207.433	180.558	204.991	202.533	194.811	189.581	0
791	O43169	CYB5B	Cytochrome b5 type B OS=Homo sapiens OX=9606 GN=CYB5B PE=1 SV=2					2	3	2	2	2	2	2	1	1	2	1	276.455	303.413	287.985	293.844	149.63	251.265	303.611	282.602	289.413	320.675	341.59	348.408	347.221	325.917	301.778	429.047	366.11	499.464	609.769	596.815	571.437	822.21	680.792	1059.32	471.128	465.252	476.883	724.247	491.932	945.152	476.583
792	P00387	CYB5R3	NADH-cytochrome b5 reductase 3 OS=Homo sapiens OX=9606 GN=CYB5R3 PE=1 SV=3					4	3	2	2	2	1	0	2	0	0	2	139.929	133.003	119.606	137.975	393.123	130.237	208.31	197.965	199.364	218.829	97.1786	223.818	71.2505	70.8313	65.2161	68.1313	60.4105	81.7112	78.1465	89.051	79.9159	107.735	92.2033	119.962	117.719	129.082	124.729	161.22	131.57	164.033	70.6898
793	Q9BQA9	CYBC1	Cytochrome b-245 chaperone 1 OS=Homo sapiens OX=9606 GN=CYBC1 PE=1 SV=1					0	1	0	0	0	0	0	0	0	0	0	0	0	0	0	0	0	38.0828	42.421	39.154	44.7106	7.57173	34.117	0	0	0	0	0	0	0	0	0	0	0	0	0	0	0	0	0	0	0
794	P08574	CYC1	Cytochrome c1, heme protein, mitochondrial OS=Homo sapiens OX=9606 GN=CYC1 PE=1 SV=3					2	1	2	3	4	4	3	3	1	2	0	60.4153	82.4335	89.2692	76.5173	44.0009	62.5559	14.4678	18.5986	21.6765	21.4504	29.438	22.9059	382.126	408.425	403.242	402.258	355.692	510.901	66.9608	56.994	86.4755	74.3612	69.8934	97.1014	459.303	536.617	645.459	540.123	529.411	711.151	388.485
795	P99999	CYCS	Cytochrome c OS=Homo sapiens OX=9606 GN=CYCS PE=1 SV=2					2	4	1	0	0	0	0	0	0	0	0	135.224	221.422	230.419	199.7	592.233	193.864	326.842	370.464	364.241	371.908	355.911	373.456	68.9919	78.2324	72.9533	70.9573	76.9879	74.8402	0	0	0	0	0	0	0	0	0	0	0	0	0
796	Q7L576	CYFIP1	Cytoplasmic FMR1-interacting protein 1 OS=Homo sapiens OX=9606 GN=CYFIP1 PE=1 SV=1					0	2	2	1	1	3	4	1	1	3	3	0	0	0	0	0	0	135.849	121.965	128.112	151.94	143.868	132.291	55.2478	44.3595	48.0831	64.2491	54.9678	52.2744	14.8737	12.3887	10.9964	15.7231	11.7234	17.556	51.1247	47.9772	58.3141	60.9706	51.914	47.1441	110.933
797	Q96F07	CYFIP2	Cytoplasmic FMR1-interacting protein 2 OS=Homo sapiens OX=9606 GN=CYFIP2 PE=1 SV=2					2	3	3	3	2	3	4	3	2	4	4	202.671	215.272	209.177	256.837	210.428	174.646	110.418	92.8863	100.822	102.889	22.9909	107.986	281.218	254.666	221.814	266.57	240.19	263.765	267.028	242.65	250.449	326.214	317.16	278.773	76.0208	64.3858	71.0218	75.2823	81.0581	77.0317	229.718
798	Q16850	CYP51A1	Lanosterol 14-alpha demethylase OS=Homo sapiens OX=9606 GN=CYP51A1 PE=1 SV=3					3	2	2	1	1	0	1	0	0	0	0	75.8272	81.3362	73.1697	84.6897	88.9638	70.1959	54.8543	57.7334	62.8909	61.8707	125.42	62.7591	198.719	198.248	192.571	187.515	173.7	240.259	33.4527	31.0242	37.7519	38.2258	32.3055	35.4036	104.249	126.67	117.727	124.856	126.337	142.342	0
799	O00622	CYR61	Protein CYR61 OS=Homo sapiens OX=9606 GN=CYR61 PE=1 SV=1					0	0	0	0	1	1	0	1	0	2	1	0	0	0	0	0	0	0	0	0	0	0	0	0	0	0	0	0	0	0	0	0	0	0	0	28.9124	30.8774	30.8643	29.706	26.1573	29.609	83.627
800	Q9NWV4	CZIB	CXXC motif containing zinc binding protein OS=Homo sapiens OX=9606 GN=CZIB PE=1 SV=1					1	0	0	0	0	0	0	0	0	0	0	31.1339	27.4975	28.28	35.3603	32.1006	33.7881	0	0	0	0	0	0	0	0	0	0	0	0	0	0	0	0	0	0	0	0	0	0	0	0	0
801	P61803	DAD1	Dolichyl-diphosphooligosaccharide--protein glycosyltransferase subunit DAD1 OS=Homo sapiens OX=9606 GN=DAD1 PE=1 SV=3					1	2	0	0	0	0	0	0	0	0	0	15.1012	18.0075	19.9832	15.0415	0	13.8218	101.657	107.935	90.4998	110.151	46.7882	144.467	0	0	0	0	0	0	0	0	0	0	0	0	0	0	0	0	0	0	0
802	Q14118	DAG1	Dystroglycan OS=Homo sapiens OX=9606 GN=DAG1 PE=1 SV=2					2	2	0	0	0	0	0	0	0	0	0	157.095	147.548	141.145	145.175	202.463	133.435	80.0973	71.1586	73.4611	84.1138	96.5909	86.4019	0	0	0	0	0	0	0	0	0	0	0	0	0	0	0	0	0	0	0
803	Q8NCG7	DAGLB	Sn1-specific diacylglycerol lipase beta OS=Homo sapiens OX=9606 GN=DAGLB PE=1 SV=2					1	0	0	0	0	0	0	0	0	0	0	65.0576	62.4385	60.6145	76.5737	8.26809	61.155	0	0	0	0	0	0	0	0	0	0	0	0	0	0	0	0	0	0	0	0	0	0	0	0	0
804	P51398	DAP3	28S ribosomal protein S29, mitochondrial OS=Homo sapiens OX=9606 GN=DAP3 PE=1 SV=1					1	4	2	2	3	3	2	2	2	2	2	13.8845	11.0626	13.9913	14.3297	14.359	14.9375	226.733	249.875	229.984	289.353	465.236	214.709	140.238	128.521	110.106	121.903	129.758	129.551	39.9905	42.9885	33.976	47.9824	48.3796	47.3449	915.479	1070.47	1448.08	1345.27	1344.83	1156.04	833.46
805	P14868	DARS	Aspartate--tRNA ligase, cytoplasmic OS=Homo sapiens OX=9606 GN=DARS PE=1 SV=2					3	3	2	3	3	2	3	3	3	3	3	436.355	433.451	445.086	466.055	572.841	415.828	726.568	658.229	672.418	579.244	61.6664	495.97	292.942	288.796	241.315	255.915	274.586	173.286	803.098	743.765	783.105	767.348	884.776	481.431	939.143	892.659	963.012	805.253	914.339	498.939	914.297
806	Q6PI48	DARS2	Aspartate--tRNA ligase, mitochondrial OS=Homo sapiens OX=9606 GN=DARS2 PE=1 SV=1					4	0	0	0	0	0	0	0	0	0	0	222.865	240.055	225.603	231.777	36.0186	218.926	0	0	0	0	0	0	0	0	0	0	0	0	0	0	0	0	0	0	0	0	0	0	0	0	0
807	Q96EP5	DAZAP1	DAZ-associated protein 1 OS=Homo sapiens OX=9606 GN=DAZAP1 PE=1 SV=1					1	0	0	0	1	0	2	1	0	0	0	99.4654	92.4463	95.659	105.405	20.039	96.4445	0	0	0	0	0	0	0	0	0	0	0	0	0	0	0	0	0	0	37.0221	37.8614	45.6483	46.1189	54.065	47.5321	0
808	P07108	DBI	Acyl-CoA-binding protein OS=Homo sapiens OX=9606 GN=DBI PE=1 SV=2					3	2	2	1	0	0	0	0	0	0	0	107.456	155.413	156.866	127.624	179.564	155.135	106.866	109.241	106.362	107.334	159.477	126.987	87.9194	103.252	87.898	108.819	127.387	138.77	37.5699	45.7693	48.1801	44.3124	43.4008	48.1398	0	0	0	0	0	0	0
809	Q16643	DBN1	Drebrin OS=Homo sapiens OX=9606 GN=DBN1 PE=1 SV=4					0	0	3	2	2	4	4	3	1	3	3	0	0	0	0	0	0	0	0	0	0	0	0	251.496	250.232	221.744	263.979	251.76	253.959	227.576	214.74	192.28	222.757	226.191	226.842	350.94	354.768	316.673	326.233	374.58	333.899	422.564
810	Q9UJU6	DBNL	Drebrin-like protein OS=Homo sapiens OX=9606 GN=DBNL PE=1 SV=1					3	0	2	0	0	0	0	0	0	0	1	145.067	138.56	131.72	154.557	15.6277	148.5	0	0	0	0	0	0	48.0905	47.5545	49.6904	56.4966	60.9666	45.5955	0	0	0	0	0	0	0	0	0	0	0	0	0
811	Q9UK59	DBR1	Lariat debranching enzyme OS=Homo sapiens OX=9606 GN=DBR1 PE=1 SV=2					1	0	0	0	0	0	0	0	0	0	0	65.1902	67.4393	64.1188	69.1226	56.6646	63.9355	0	0	0	0	0	0	0	0	0	0	0	0	0	0	0	0	0	0	0	0	0	0	0	0	0
812	P11182	DBT	Lipoamide acyltransferase component of branched-chain alpha-keto acid dehydrogenase complex, mitochondrial OS=Homo sapiens OX=9606 GN=DBT PE=1 SV=3					0	3	1	1	1	0	0	0	1	0	1	0	0	0	0	0	0	322.96	312.205	342.557	352.582	484.378	271.687	94.1279	79.9001	81.023	110.562	89.0701	105.684	125.125	125.217	109.771	151.576	144.004	139.503	75.0681	66.8457	68.0663	81.4865	82.2097	83.1249	0
813	Q9Y4B6	DCAF1	DDB1- and CUL4-associated factor 1 OS=Homo sapiens OX=9606 GN=DCAF1 PE=1 SV=3					1	5	3	2	4	2	3	3	1	2	2	59.3433	59.6937	61.9788	64.0945	16.4071	57.5128	266.512	245.737	242.94	292.454	262.325	222.585	169.821	149.614	146.778	174.231	147.718	159.842	72.8862	73.4946	75.7929	81.0508	86.9333	89.5357	348.772	348.581	378.694	409.416	403.899	409.929	120.195
814	Q9NV06	DCAF13	DDB1- and CUL4-associated factor 13 OS=Homo sapiens OX=9606 GN=DCAF13 PE=1 SV=2					0	0	1	0	1	2	1	4	1	3	2	0	0	0	0	0	0	0	0	0	0	0	0	180.309	171.433	147.973	163.03	138.992	146.584	0	0	0	0	0	0	32.888	24.3706	34.0269	32.4803	24.571	26.0141	86.9217
815	Q66K64	DCAF15	DDB1- and CUL4-associated factor 15 OS=Homo sapiens OX=9606 GN=DCAF15 PE=1 SV=1					0	2	0	1	0	0	0	0	0	0	0	0	0	0	0	0	0	109.812	107.905	99.4621	104.842	123.647	108.694	0	0	0	0	0	0	87.2809	90.4091	80.4403	99.4032	101.019	93.195	0	0	0	0	0	0	0
816	P61962	DCAF7	DDB1- and CUL4-associated factor 7 OS=Homo sapiens OX=9606 GN=DCAF7 PE=1 SV=1					0	3	1	3	1	1	0	2	1	1	1	0	0	0	0	0	0	125.376	128.822	121.649	126.59	127.037	134.675	53.9893	51.981	43.176	60.6652	49.7951	45.6262	199.65	223.721	206.957	260.009	250.804	224.488	18.7058	15.7641	18.5391	20.2442	18.4499	18.5809	196.771
817	Q5TAQ9	DCAF8	DDB1- and CUL4-associated factor 8 OS=Homo sapiens OX=9606 GN=DCAF8 PE=1 SV=1					1	2	0	0	0	0	0	0	0	0	0	40.686	36.7978	40.3808	46.0807	22.7226	32.2271	92.4394	84.3153	84.3437	95.1166	95.7474	97.6366	0	0	0	0	0	0	0	0	0	0	0	0	0	0	0	0	0	0	0
818	Q96PD2	DCBLD2	Discoidin, CUB and LCCL domain-containing protein 2 OS=Homo sapiens OX=9606 GN=DCBLD2 PE=1 SV=1					0	1	0	0	0	0	0	0	0	0	0	0	0	0	0	0	0	19.3723	17.4953	17.1958	18.9564	4.58811	19.183	0	0	0	0	0	0	0	0	0	0	0	0	0	0	0	0	0	0	0
819	P27707	DCK	Deoxycytidine kinase OS=Homo sapiens OX=9606 GN=DCK PE=1 SV=1					3	1	1	0	0	0	0	0	0	0	0	101.043	103.412	100.317	99.1821	134.336	107.919	13.1071	13.4573	12.079	14.8771	20.8659	14.7431	22.9791	25.7788	19.1553	19.6672	15.6528	16.3907	0	0	0	0	0	0	0	0	0	0	0	0	0
820	Q9NPI6	DCP1A	mRNA-decapping enzyme 1A OS=Homo sapiens OX=9606 GN=DCP1A PE=1 SV=3					1	3	0	1	0	0	0	0	0	0	0	102.223	88.4975	112.213	124.692	147.948	95.1163	239.378	227.25	247.478	273.369	235.252	239.672	0	0	0	0	0	0	103.455	98.3414	113.324	116.283	120.185	111.232	0	0	0	0	0	0	0
821	Q96C86	DCPS	m7GpppX diphosphatase OS=Homo sapiens OX=9606 GN=DCPS PE=1 SV=2					3	0	0	0	0	0	0	0	0	0	0	226.982	284.504	271.699	296.123	180.468	267.482	0	0	0	0	0	0	0	0	0	0	0	0	0	0	0	0	0	0	0	0	0	0	0	0	0
822	Q14203	DCTN1	Dynactin subunit 1 OS=Homo sapiens OX=9606 GN=DCTN1 PE=1 SV=3					1	5	3	2	4	4	3	1	1	2	3	41.7643	48.6471	46.359	58.7104	37.631	34.4794	388.058	364.369	378.752	450.515	403.282	374.575	158.26	129.842	132.236	144.681	144.709	133.474	95.082	90.338	99.8468	107.565	104.675	97.4303	166.323	145.593	160.983	160.712	164.032	168.055	251.106
823	Q13561	DCTN2	Dynactin subunit 2 OS=Homo sapiens OX=9606 GN=DCTN2 PE=1 SV=4					0	4	3	4	2	2	2	0	3	1	1	0	0	0	0	0	0	405.97	380.937	417.078	464.508	548.876	382.279	305.969	247.026	253.163	281.876	287.405	289.413	361.138	303.526	329.239	373.272	395.111	350.86	82.9442	88.5208	92.972	85.497	99.7702	89.6251	170.327
824	O75935	DCTN3	Dynactin subunit 3 OS=Homo sapiens OX=9606 GN=DCTN3 PE=1 SV=1					0	4	3	0	0	0	0	0	0	0	0	0	0	0	0	0	0	395.017	387.804	371.977	463.5	419.137	405.01	220.432	203.033	194.405	242.047	229.813	232.474	0	0	0	0	0	0	0	0	0	0	0	0	0
825	Q9UJW0	DCTN4	Dynactin subunit 4 OS=Homo sapiens OX=9606 GN=DCTN4 PE=1 SV=1					0	1	4	2	1	3	2	2	1	2	1	0	0	0	0	0	0	52.883	52.7638	47.4508	57.0942	46.581	44.3066	383.017	324.494	348.717	396.806	384.795	368.891	49.1557	48.6138	51.7467	65.9028	60.6749	56.7606	141.134	128.387	153.537	140.798	157.25	134.533	290.006
826	Q9BTE1	DCTN5	Dynactin subunit 5 OS=Homo sapiens OX=9606 GN=DCTN5 PE=1 SV=1					0	1	1	2	0	1	1	2	0	0	0	0	0	0	0	0	0	55.7182	42.2785	49.6272	57.6709	60.6255	43.0984	309.196	279.914	265.88	300.118	275.482	262.106	332.855	325.933	306.441	392.639	364.179	347.661	0	0	0	0	0	0	381.623
827	O00399	DCTN6	Dynactin subunit 6 OS=Homo sapiens OX=9606 GN=DCTN6 PE=1 SV=1					0	1	0	1	0	0	0	0	0	0	0	0	0	0	0	0	0	252.128	230.967	258.188	254.817	276.934	225.773	0	0	0	0	0	0	33.155	28.8028	35.5525	37.5637	38.2562	31.5704	0	0	0	0	0	0	0
828	Q9H773	DCTPP1	dCTP pyrophosphatase 1 OS=Homo sapiens OX=9606 GN=DCTPP1 PE=1 SV=1					2	1	1	0	0	0	0	0	0	0	0	85.9589	84.7852	75.863	89.8637	3.66307	80.7252	90.8061	83.6449	86.7242	81.653	9.05756	102.709	21.0777	22.7946	23.7556	23.4293	27.798	26.9723	0	0	0	0	0	0	0	0	0	0	0	0	0
829	Q96GG9	DCUN1D1	DCN1-like protein 1 OS=Homo sapiens OX=9606 GN=DCUN1D1 PE=1 SV=1					3	0	0	0	0	0	0	0	0	0	0	203.677	195.119	195.18	206.27	253.02	187.359	0	0	0	0	0	0	0	0	0	0	0	0	0	0	0	0	0	0	0	0	0	0	0	0	0
830	Q92564	DCUN1D4	DCN1-like protein 4 OS=Homo sapiens OX=9606 GN=DCUN1D4 PE=1 SV=2					1	0	0	0	0	0	0	0	0	0	0	42.2089	35.0012	32.8537	43.8703	53.8112	39.0943	0	0	0	0	0	0	0	0	0	0	0	0	0	0	0	0	0	0	0	0	0	0	0	0	0
831	Q9BTE7	DCUN1D5	DCN1-like protein 5 OS=Homo sapiens OX=9606 GN=DCUN1D5 PE=1 SV=1					2	1	0	0	0	0	0	0	0	0	0	74.3771	70.5023	68.1876	76.1477	40.2428	79.1725	36.3279	35.7687	30.1065	33.8543	34.9721	31.4692	0	0	0	0	0	0	0	0	0	0	0	0	0	0	0	0	0	0	0
832	Q7Z4W1	DCXR	L-xylulose reductase OS=Homo sapiens OX=9606 GN=DCXR PE=1 SV=2					3	0	1	0	0	0	0	0	0	0	0	409.309	382.347	397.304	432.695	659.775	380.629	0	0	0	0	0	0	22.8386	22.4113	21.9931	23.5593	22.7516	23.9307	0	0	0	0	0	0	0	0	0	0	0	0	0
833	Q9BW61	DDA1	DET1- and DDB1-associated protein 1 OS=Homo sapiens OX=9606 GN=DDA1 PE=1 SV=1					0	1	2	0	1	0	1	0	0	0	0	0	0	0	0	0	0	15.5088	18.595	17.3416	23.4564	5.39745	22.9776	59.3001	48.1856	46.852	60.0084	57.0223	64.1048	0	0	0	0	0	0	76.0668	76.7467	78.1913	90.9092	94.9981	86.9958	0
834	O94760	DDAH1	N(G),N(G)-dimethylarginine dimethylaminohydrolase 1 OS=Homo sapiens OX=9606 GN=DDAH1 PE=1 SV=3					2	0	0	0	0	0	0	0	0	0	0	78.9797	89.1009	80.897	86.9959	103.308	88.4241	0	0	0	0	0	0	0	0	0	0	0	0	0	0	0	0	0	0	0	0	0	0	0	0	0
835	Q16531	DDB1	DNA damage-binding protein 1 OS=Homo sapiens OX=9606 GN=DDB1 PE=1 SV=1					1	2	4	1	1	4	4	2	3	4	3	45.4149	37.5811	43.1381	40.5884	57.0101	40.3995	120.23	108.459	108.85	111.571	64.7095	117.924	268.681	240.81	239.749	277.785	274.827	256.378	27.827	22.2318	23.087	31.6654	29.3864	27.0459	106.795	108.682	114.916	117.122	114.518	103.267	396.273
836	Q92466	DDB2	DNA damage-binding protein 2 OS=Homo sapiens OX=9606 GN=DDB2 PE=1 SV=1					0	2	0	0	0	0	0	0	0	0	0	0	0	0	0	0	0	144.853	142.022	129.549	150.137	70.6735	159.695	0	0	0	0	0	0	0	0	0	0	0	0	0	0	0	0	0	0	0
837	Q5TDH0	DDI2	Protein DDI1 homolog 2 OS=Homo sapiens OX=9606 GN=DDI2 PE=1 SV=1					1	0	2	2	2	1	0	0	2	1	1	38.6606	47.7896	36.7661	49.8728	23.1935	40.0703	0	0	0	0	0	0	95.3807	102.677	99.1637	113.625	111.678	121.162	120.204	126.452	126.869	145.924	163.127	153.102	171.435	207.631	217.32	198.444	223.623	214.662	57.8042
838	P39656	DDOST	Dolichyl-diphosphooligosaccharide--protein glycosyltransferase 48 kDa subunit OS=Homo sapiens OX=9606 GN=DDOST PE=1 SV=4					3	3	4	2	4	4	2	2	4	2	4	268.442	303.572	245.176	275.277	264.32	225.124	273.251	229.866	249.506	264.748	368.282	259.742	336.998	290.976	307.55	350.767	291.279	372.422	105.441	110.447	96.1256	137.704	111.062	133.042	285.802	264.773	291.91	321.011	283.247	358.009	339.145
839	Q96HY6	DDRGK1	DDRGK domain-containing protein 1 OS=Homo sapiens OX=9606 GN=DDRGK1 PE=1 SV=2					1	0	1	1	1	2	0	0	1	0	0	37.6484	47.5947	46.1654	37.3731	0	34.4186	0	0	0	0	0	0	45.8938	41.5441	36.2661	48.5358	45.7385	56.3396	77.5151	69.4834	74.3954	152.499	101.617	136.609	48.3109	42.6005	40.6951	78.273	60.3342	89.0496	136.916
840	P30046	DDT	D-dopachrome decarboxylase OS=Homo sapiens OX=9606 GN=DDT PE=1 SV=3					1	2	0	0	0	0	0	0	0	0	0	128.197	146.959	129.724	138.77	7.36549	155.239	394.983	391.084	396.742	378.984	57.8359	478.395	0	0	0	0	0	0	0	0	0	0	0	0	0	0	0	0	0	0	0
841	Q92499	DDX1	ATP-dependent RNA helicase DDX1 OS=Homo sapiens OX=9606 GN=DDX1 PE=1 SV=2					2	4	3	1	3	4	4	3	4	2	4	97.3124	98.285	104.967	100.599	79.8403	98.119	239.562	226.693	228.348	256.005	266.068	276.786	99.1082	94.3032	86.6954	128.872	83.8969	120.356	22.5037	22.5915	22.6759	23.9659	24.075	30.1864	217.911	200.119	196.387	269.524	189.182	241.543	509.798
842	Q13206	DDX10	Probable ATP-dependent RNA helicase DDX10 OS=Homo sapiens OX=9606 GN=DDX10 PE=1 SV=2					0	0	0	0	0	0	1	1	3	2	3	0	0	0	0	0	0	0	0	0	0	0	0	0	0	0	0	0	0	0	0	0	0	0	0	0	0	0	0	0	0	0
843	Q96FC9	DDX11	ATP-dependent DNA helicase DDX11 OS=Homo sapiens OX=9606 GN=DDX11 PE=1 SV=1					0	2	4	3	3	3	2	2	1	2	3	0	0	0	0	0	0	82.4528	79.2572	80.5211	92.4682	43.8431	84.7586	228.449	211.179	193.074	249.261	200.341	212.992	129.824	144	126.862	170.898	154.874	168.25	350.39	385.998	394.14	476.659	445.912	420.237	218.374
844	Q92841	DDX17	Probable ATP-dependent RNA helicase DDX17 OS=Homo sapiens OX=9606 GN=DDX17 PE=1 SV=2					1	5	5	5	6	5	8	6	8	6	8	35.6659	41.6587	35.6048	47.2907	7.3614	41.9981	446.203	414.355	434.235	471.78	162.933	460.418	496.334	456.309	438.634	532.107	445.705	468.887	563.422	547.168	566.705	669.75	623.488	582.758	1060.24	1036.15	1137.66	1167.16	1122.9	1114.52	1047.92
845	Q9NVP1	DDX18	ATP-dependent RNA helicase DDX18 OS=Homo sapiens OX=9606 GN=DDX18 PE=1 SV=2					0	0	0	1	3	4	3	3	6	3	2	0	0	0	0	0	0	0	0	0	0	0	0	0	0	0	0	0	0	80.5272	90.1802	76.3712	48.9582	46.5959	46.5175	201.046	192.87	187.255	119.482	99.878	120.54	262.767
846	Q9NUU7	DDX19A	ATP-dependent RNA helicase DDX19A OS=Homo sapiens OX=9606 GN=DDX19A PE=1 SV=1					0	2	1	0	2	1	0	1	0	1	0	0	0	0	0	0	0	83.5952	80.7638	77.2671	89.0663	61.1433	79.6718	16.6941	18.5461	21.509	26.013	17.1246	21.6603	0	0	0	0	0	0	274.786	254.113	265.699	277.366	269.71	273.532	112.909
847	Q9UMR2	DDX19B	ATP-dependent RNA helicase DDX19B OS=Homo sapiens OX=9606 GN=DDX19B PE=1 SV=1					1	3	4	4	4	4	4	5	3	4	4	61.6243	61.737	67.7113	82.4472	7.23584	59.9325	404.667	382.721	373.81	431.132	475.055	410.958	455.714	406.047	424.873	503.506	463.822	485.061	208.819	198.934	197.741	248.135	234.53	239.353	440.636	443.107	485.97	518.589	513.267	507.049	405.873
848	Q9UHI6	DDX20	Probable ATP-dependent RNA helicase DDX20 OS=Homo sapiens OX=9606 GN=DDX20 PE=1 SV=2					0	0	3	1	3	3	3	3	5	5	3	0	0	0	0	0	0	0	0	0	0	0	0	336.511	261.661	259.684	392.477	306.75	299.528	22.1361	19.5334	21.4129	29.9101	26.7748	26.8579	190.115	188.806	222.507	289.963	228.982	216.764	221.246
849	Q9NR30	DDX21	Nucleolar RNA helicase 2 OS=Homo sapiens OX=9606 GN=DDX21 PE=1 SV=5					0	2	4	2	2	3	2	5	4	7	1	0	0	0	0	0	0	154.879	200.912	187.263	167.726	75.7595	205.385	252.262	313.334	270.484	254.169	240.385	303.593	104.285	114.814	108.988	77.9763	86.3379	80.4656	373.304	380.927	389.279	248.352	244.244	277.332	494.404
850	Q9BUQ8	DDX23	Probable ATP-dependent RNA helicase DDX23 OS=Homo sapiens OX=9606 GN=DDX23 PE=1 SV=3					0	4	6	3	3	6	3	4	3	4	3	0	0	0	0	0	0	292.096	299.77	318.27	327.203	270.107	257.013	265.567	257.339	246.474	308.82	257.837	293.27	194.126	201.844	186.847	255.067	236.502	245.973	314.361	322.628	347.391	409.468	364.349	377.56	611.476
851	Q9GZR7	DDX24	ATP-dependent RNA helicase DDX24 OS=Homo sapiens OX=9606 GN=DDX24 PE=1 SV=1					0	0	4	2	2	3	1	2	3	1	2	0	0	0	0	0	0	0	0	0	0	0	0	240.726	225.43	185.096	235.866	221.536	205.53	223.268	202.721	202.85	168.631	151.889	161.885	138.244	131.35	127.933	95.6549	93.5489	94.4957	371.396
852	Q96GQ7	DDX27	Probable ATP-dependent RNA helicase DDX27 OS=Homo sapiens OX=9606 GN=DDX27 PE=1 SV=2					0	0	0	0	0	0	0	0	0	2	2	0	0	0	0	0	0	0	0	0	0	0	0	0	0	0	0	0	0	0	0	0	0	0	0	0	0	0	0	0	0	0
853	Q9NUL7	DDX28	Probable ATP-dependent RNA helicase DDX28 OS=Homo sapiens OX=9606 GN=DDX28 PE=1 SV=2					0	0	3	2	1	1	1	1	2	2	1	0	0	0	0	0	0	0	0	0	0	0	0	425.883	403.26	325.457	436.278	371.916	420.666	320.987	346.332	331.016	396.343	375.747	350.527	187.576	209.37	211.782	214.295	200.28	190.469	336.251
854	Q9H8H2	DDX31	Probable ATP-dependent RNA helicase DDX31 OS=Homo sapiens OX=9606 GN=DDX31 PE=1 SV=2					0	0	0	0	0	0	0	0	1	3	1	0	0	0	0	0	0	0	0	0	0	0	0	0	0	0	0	0	0	0	0	0	0	0	0	0	0	0	0	0	0	0
855	O00148	DDX39A	ATP-dependent RNA helicase DDX39A OS=Homo sapiens OX=9606 GN=DDX39A PE=1 SV=2					1	2	3	4	2	2	2	3	2	1	1	162.416	152.661	154.17	186.629	216.835	130.81	228.341	214.612	223.398	249.79	310.197	217.941	388.787	358.707	326.288	404.579	348.772	323.51	364.81	401.795	382.158	482.236	504.065	408.79	104.217	100.134	120.266	127.055	123.62	116.413	162.278
856	Q13838	DDX39B	Spliceosome RNA helicase DDX39B OS=Homo sapiens OX=9606 GN=DDX39B PE=1 SV=1					3	4	4	2	4	5	3	4	4	2	3	229.56	212.032	209.961	242.318	178.188	197.247	345.45	342.109	352.862	377.246	242.43	327.581	370.759	342.208	332.183	392.094	389.04	355.126	143.463	146.678	152.043	175.389	177.452	154.47	708.377	747.327	870.62	905.291	885.779	835.825	719.384
857	O00571	DDX3X	ATP-dependent RNA helicase DDX3X OS=Homo sapiens OX=9606 GN=DDX3X PE=1 SV=3					3	2	4	2	4	2	2	4	2	3	3	125.346	145.163	120.548	158.724	192.296	132.259	93.1085	77.2985	77.8363	91.9604	17.3697	99.324	62.7716	69.4177	72.5384	80.4725	75.6571	78.5251	60.091	62.0924	53.3078	78.1911	71.1161	70.5498	245.42	237.107	281.922	285.151	253.677	237.433	62.6666
858	Q9UJV9	DDX41	Probable ATP-dependent RNA helicase DDX41 OS=Homo sapiens OX=9606 GN=DDX41 PE=1 SV=2					0	1	0	0	1	0	0	1	0	0	0	0	0	0	0	0	0	65.8526	66.7741	68.0201	76.0742	77.2736	66.1199	0	0	0	0	0	0	0	0	0	0	0	0	27.7622	23.1291	26.5623	27.2925	22.9776	28.1005	0
859	Q86XP3	DDX42	ATP-dependent RNA helicase DDX42 OS=Homo sapiens OX=9606 GN=DDX42 PE=1 SV=1					3	1	3	2	2	1	0	0	0	0	0	101.38	98.7275	99.5929	112.444	156.104	100.848	78.1374	75.7225	80.2578	81.7474	91.4134	82.241	132.193	126.696	124.849	134.647	127.216	134.533	73.3935	71.2814	78.3523	93.5733	90.6825	93.6172	184.831	189.935	223.138	183.516	201.108	182.59	78.4965
860	Q7L014	DDX46	Probable ATP-dependent RNA helicase DDX46 OS=Homo sapiens OX=9606 GN=DDX46 PE=1 SV=2					1	2	2	3	1	3	3	3	4	2	5	108.306	98.1346	100.865	123.788	144.324	119.109	43.2693	44.4128	50.8153	57.508	33.243	66.4055	59.6632	57.3036	55.2983	78.7636	59.9266	65.9164	128.477	133.084	121.595	177.127	146.179	162.884	57.8853	59.502	66.055	87.1569	64.1798	69.6972	334.303
861	Q9H0S4	DDX47	Probable ATP-dependent RNA helicase DDX47 OS=Homo sapiens OX=9606 GN=DDX47 PE=1 SV=1					1	0	4	2	2	4	4	5	4	4	4	22.4123	24.1911	23.8568	30.9271	2.68162	19.6558	0	0	0	0	0	0	761.26	772.256	674.984	853.815	795.835	861.039	227.656	208.507	230.09	246.508	242.95	235.97	557.388	499.229	583.814	550.2	521.552	507.507	809.864
862	Q9Y6V7	DDX49	Probable ATP-dependent RNA helicase DDX49 OS=Homo sapiens OX=9606 GN=DDX49 PE=1 SV=1					1	2	1	1	2	2	2	2	3	5	3	14.5581	16.1146	19.9222	16.4995	0	15.5609	148.137	148.176	146.408	154.761	149.029	149.91	24.9518	27.3724	22.264	30.4053	24.2869	24.6563	22.6767	25.6167	25.5951	25.1881	27.1196	28.282	312.389	304.677	298.901	330.318	304.194	294.954	402.959
863	P17844	DDX5	Probable ATP-dependent RNA helicase DDX5 OS=Homo sapiens OX=9606 GN=DDX5 PE=1 SV=1					3	4	2	3	3	2	3	3	4	3	3	152.939	162.678	157.406	191.459	40.3608	144.319	303.504	284.267	315.315	327.724	166.715	309.473	114.853	112.619	96.5652	96.8058	95.4905	113.647	232.716	187.747	248.851	267.344	250.422	222.71	420.676	378.264	396.035	321.644	355.116	333.105	137.488
864	Q9BQ39	DDX50	ATP-dependent RNA helicase DDX50 OS=Homo sapiens OX=9606 GN=DDX50 PE=1 SV=1					0	0	0	0	1	1	0	0	0	1	0	0	0	0	0	0	0	0	0	0	0	0	0	0	0	0	0	0	0	0	0	0	0	0	0	119.222	111.891	109.767	89.3957	100.417	96.1503	247.898
865	Q8N8A6	DDX51	ATP-dependent RNA helicase DDX51 OS=Homo sapiens OX=9606 GN=DDX51 PE=1 SV=3					0	0	2	2	4	3	2	2	3	2	2	0	0	0	0	0	0	0	0	0	0	0	0	40.2764	42.9494	37.8237	37.2161	49.1878	40.4714	151.507	136.284	134.339	166.533	179.758	187.673	294.614	278.715	287.559	293.602	308.227	318.88	145.506
866	Q9Y2R4	DDX52	Probable ATP-dependent RNA helicase DDX52 OS=Homo sapiens OX=9606 GN=DDX52 PE=1 SV=3					0	0	0	0	2	3	2	3	1	4	4	0	0	0	0	0	0	0	0	0	0	0	0	0	0	0	0	0	0	0	0	0	0	0	0	142.026	154.686	148.252	118.349	95.3016	111.738	253.133
867	Q8TDD1	DDX54	ATP-dependent RNA helicase DDX54 OS=Homo sapiens OX=9606 GN=DDX54 PE=1 SV=2					1	0	0	3	2	1	3	3	4	3	2	26.4327	30.1469	26.6666	21.8759	36.2749	22.2635	0	0	0	0	0	0	0	0	0	0	0	0	216.013	211.35	200.492	146.298	130.08	130.244	273.674	271.052	252.978	200.86	178.952	187.64	47.8514
868	Q8NHQ9	DDX55	ATP-dependent RNA helicase DDX55 OS=Homo sapiens OX=9606 GN=DDX55 PE=1 SV=3					0	0	2	3	2	3	1	3	3	0	1	0	0	0	0	0	0	0	0	0	0	0	0	217.375	218.809	192.893	202.339	172.645	163.185	644.781	619.008	565.742	507.145	418.772	471.834	363.361	394.605	380.066	306.549	266.952	311.506	928.432
869	Q9NY93	DDX56	Probable ATP-dependent RNA helicase DDX56 OS=Homo sapiens OX=9606 GN=DDX56 PE=1 SV=1					0	0	0	1	1	3	2	3	3	3	1	0	0	0	0	0	0	0	0	0	0	0	0	0	0	0	0	0	0	74.9616	57.9231	59.9196	56.5422	49.1893	50.8676	142.061	116.744	120.784	88.9281	78.2478	76.3199	742.219
870	P26196	DDX6	Probable ATP-dependent RNA helicase DDX6 OS=Homo sapiens OX=9606 GN=DDX6 PE=1 SV=2					2	4	5	4	2	2	3	3	3	4	4	112.02	108.967	102.355	117.497	36.0489	115.2	278.349	278.194	283.013	293.931	264.475	284.327	395.762	335.531	433.161	414.186	332.309	362.021	315.685	238.092	296.946	291.467	247.605	230.783	172.713	160.349	206.292	174.161	155.658	132.738	197.954
871	Q16698	DECR1	2,4-dienoyl-CoA reductase, mitochondrial OS=Homo sapiens OX=9606 GN=DECR1 PE=1 SV=1					0	2	2	0	2	2	3	3	2	3	3	0	0	0	0	0	0	117.346	128.789	125.586	130.989	131.743	129.63	163.726	147.01	156.874	183.856	168.786	185.93	0	0	0	0	0	0	58.6966	46.5442	55.9126	46.9813	45.1331	45.2893	328.418
872	Q9H4E7	DEF6	Differentially expressed in FDCP 6 homolog OS=Homo sapiens OX=9606 GN=DEF6 PE=1 SV=1					0	0	1	0	0	1	0	1	0	0	0	0	0	0	0	0	0	0	0	0	0	0	0	34.6779	28.5985	30.9179	38.4446	35.1082	42.7054	0	0	0	0	0	0	0	0	0	0	0	0	208.242
873	P35659	DEK	Protein DEK OS=Homo sapiens OX=9606 GN=DEK PE=1 SV=1					2	2	3	3	3	5	2	3	2	3	2	407.965	407.769	418.595	430.189	44.3089	395.263	183.734	174.489	170.28	174.296	163.438	182.748	104.807	106.248	102.699	112.612	116.445	114.104	172.8	167.645	167.166	176.175	174.656	183.804	627.168	728.298	771.4	754.46	775.792	756.396	380.555
874	Q5VZ89	DENND4C	DENN domain-containing protein 4C OS=Homo sapiens OX=9606 GN=DENND4C PE=1 SV=3					0	0	1	0	0	0	0	0	0	0	0	0	0	0	0	0	0	0	0	0	0	0	0	44.2857	41.6731	52.638	53.5632	53.2	46.7886	0	0	0	0	0	0	0	0	0	0	0	0	0
875	O43583	DENR	Density-regulated protein OS=Homo sapiens OX=9606 GN=DENR PE=1 SV=2					1	1	0	0	0	0	0	0	0	0	0	20.131	22.729	24.1838	25.2259	26.7058	25.0649	42.8988	46.8644	48.4396	44.0768	68.3304	53.9001	0	0	0	0	0	0	0	0	0	0	0	0	0	0	0	0	0	0	0
876	Q5TB30	DEPDC1	DEP domain-containing protein 1A OS=Homo sapiens OX=9606 GN=DEPDC1 PE=1 SV=2					0	0	1	0	1	0	0	1	0	0	0	0	0	0	0	0	0	0	0	0	0	0	0	62.313	51.4139	56.474	66.1442	57.167	54.5744	0	0	0	0	0	0	130.142	117.747	127.186	133.589	132.568	120.313	0
877	Q8WUY9	DEPDC1B	DEP domain-containing protein 1B OS=Homo sapiens OX=9606 GN=DEPDC1B PE=1 SV=2					0	0	0	2	0	0	0	1	1	0	0	0	0	0	0	0	0	0	0	0	0	0	0	0	0	0	0	0	0	374.935	414.59	374.574	478.57	436.426	400.245	0	0	0	0	0	0	0
878	Q9Y315	DERA	Deoxyribose-phosphate aldolase OS=Homo sapiens OX=9606 GN=DERA PE=1 SV=2					0	2	1	1	0	0	1	0	1	0	1	0	0	0	0	0	0	275.237	262.246	250.445	301.262	324.292	261.877	173.469	161.803	156.176	211.628	176.741	190.179	51.1001	46.073	58.8631	62.6989	74.0932	67.517	0	0	0	0	0	0	0
879	Q9BUN8	DERL1	Derlin-1 OS=Homo sapiens OX=9606 GN=DERL1 PE=1 SV=1					0	0	2	1	2	0	1	1	1	0	1	0	0	0	0	0	0	0	0	0	0	0	0	223.12	221.091	181.062	234.548	205.19	263.028	96.2111	114.859	111.626	129.669	128.572	171.449	197.96	294.665	277.38	355.822	321.511	457.977	0
880	Q9GZP9	DERL2	Derlin-2 OS=Homo sapiens OX=9606 GN=DERL2 PE=1 SV=1					0	0	1	0	1	1	1	0	1	0	0	0	0	0	0	0	0	0	0	0	0	0	0	16.1689	14.7569	15.3698	18.5197	12.465	17.9782	0	0	0	0	0	0	27.4037	24.3216	32.2435	28.8213	29.5335	29.2813	22.6847
881	O00273	DFFA	DNA fragmentation factor subunit alpha OS=Homo sapiens OX=9606 GN=DFFA PE=1 SV=1					3	0	1	1	0	0	0	0	0	0	0	286.951	287.13	272.693	298.029	385.139	260.234	0	0	0	0	0	0	166.459	151.412	171.38	157.276	189.324	156.594	108.149	108.921	99.4773	111.157	128.769	96.4745	0	0	0	0	0	0	0
882	Q8WYQ5	DGCR8	Microprocessor complex subunit DGCR8 OS=Homo sapiens OX=9606 GN=DGCR8 PE=1 SV=1					0	1	1	1	0	0	0	2	0	0	1	0	0	0	0	0	0	132.588	120.286	127.573	136.385	194.465	128.47	266.244	264.62	223.604	262.217	271.028	250.189	289.311	274.593	293.13	331.666	333.028	291.535	0	0	0	0	0	0	0
883	P23743	DGKA	Diacylglycerol kinase alpha OS=Homo sapiens OX=9606 GN=DGKA PE=1 SV=3					0	1	0	0	0	1	1	1	0	1	1	0	0	0	0	0	0	72.1953	65.8139	65.6491	82.0389	93.6548	64.4119	0	0	0	0	0	0	0	0	0	0	0	0	0	0	0	0	0	0	94.8948
884	P52824	DGKQ	Diacylglycerol kinase theta OS=Homo sapiens OX=9606 GN=DGKQ PE=1 SV=2					0	0	0	1	0	0	0	0	0	0	1	0	0	0	0	0	0	0	0	0	0	0	0	0	0	0	0	0	0	115.206	134.523	122.024	162.803	160.163	149.381	0	0	0	0	0	0	0
885	Q7Z3D6	DGLUCY	D-glutamate cyclase, mitochondrial OS=Homo sapiens OX=9606 GN=DGLUCY PE=1 SV=2					0	0	1	0	0	0	0	0	0	0	0	0	0	0	0	0	0	0	0	0	0	0	0	79.3675	66.9844	65.7398	72.4278	71.0705	81.4228	0	0	0	0	0	0	0	0	0	0	0	0	0
886	Q15392	DHCR24	Delta(24)-sterol reductase OS=Homo sapiens OX=9606 GN=DHCR24 PE=1 SV=2					0	3	2	4	5	4	2	4	3	3	2	0	0	0	0	0	0	135.388	112.257	163.917	132.282	55.5985	111.107	187.808	176.352	105.348	179.261	160.555	165.798	210.312	242.254	214.486	259.567	289.018	297.105	683.414	634.909	662.186	823.513	817.533	723.508	611.65
887	Q9UBM7	DHCR7	7-dehydrocholesterol reductase OS=Homo sapiens OX=9606 GN=DHCR7 PE=1 SV=1					2	1	2	3	0	1	1	2	0	3	2	177.57	200.633	186.962	230.377	268.187	167.965	134.49	115.556	131.759	137.406	186.757	119.117	201.129	179.357	157.009	209.559	195.954	206.272	360.741	371.252	328.914	464.978	452.263	456.591	0	0	0	0	0	0	114.957
888	P00374	DHFR	Dihydrofolate reductase OS=Homo sapiens OX=9606 GN=DHFR PE=1 SV=2					5	1	1	0	0	0	0	0	0	0	0	277.108	284.317	256.756	292.656	223.941	265.437	41.7293	44.519	48.2593	44.4263	55.8917	45.3444	55.6252	48.5018	56.4788	52.9995	56.2738	57.3325	0	0	0	0	0	0	0	0	0	0	0	0	0
889	Q02127	DHODH	Dihydroorotate dehydrogenase (quinone), mitochondrial OS=Homo sapiens OX=9606 GN=DHODH PE=1 SV=3					1	0	0	0	0	0	0	0	0	0	0	25.5534	25.2033	30.3032	26.8287	34.3145	29.4241	0	0	0	0	0	0	0	0	0	0	0	0	0	0	0	0	0	0	0	0	0	0	0	0	0
890	P49366	DHPS	Deoxyhypusine synthase OS=Homo sapiens OX=9606 GN=DHPS PE=1 SV=1					2	0	0	0	0	0	0	0	0	0	0	75.1892	86.8517	83.9857	84.9253	59.1495	85.1568	0	0	0	0	0	0	0	0	0	0	0	0	0	0	0	0	0	0	0	0	0	0	0	0	0
891	Q96LJ7	DHRS1	Dehydrogenase/reductase SDR family member 1 OS=Homo sapiens OX=9606 GN=DHRS1 PE=1 SV=1					0	0	0	0	0	0	0	1	0	0	0	0	0	0	0	0	0	0	0	0	0	0	0	0	0	0	0	0	0	0	0	0	0	0	0	0	0	0	0	0	0	0
892	Q9Y394	DHRS7	Dehydrogenase/reductase SDR family member 7 OS=Homo sapiens OX=9606 GN=DHRS7 PE=1 SV=1					1	0	0	0	0	0	0	0	0	0	0	164.431	134.8	130.146	145.473	43.9606	158.506	0	0	0	0	0	0	0	0	0	0	0	0	0	0	0	0	0	0	0	0	0	0	0	0	0
893	Q6IAN0	DHRS7B	Dehydrogenase/reductase SDR family member 7B OS=Homo sapiens OX=9606 GN=DHRS7B PE=1 SV=2					0	0	2	1	1	3	0	0	1	0	0	0	0	0	0	0	0	0	0	0	0	0	0	200.819	190.263	170.505	195.096	181.731	202.772	107.578	114.538	109.84	141.927	139.617	134.342	99.6163	95.8589	99.5823	102.018	115.367	104.303	169.526
894	O43143	DHX15	Pre-mRNA-splicing factor ATP-dependent RNA helicase DHX15 OS=Homo sapiens OX=9606 GN=DHX15 PE=1 SV=2					3	2	3	3	2	2	3	1	2	3	2	299.1	280.499	290.078	308.744	26.7112	285.135	362.23	358.452	317.968	383.767	72.8816	436.186	256.254	263.888	193.094	308.168	228.107	271.623	244.016	263.158	246.249	318.244	255.895	285.245	153.617	135.984	143.894	163.835	128.488	155.548	224.28
895	O60231	DHX16	Pre-mRNA-splicing factor ATP-dependent RNA helicase DHX16 OS=Homo sapiens OX=9606 GN=DHX16 PE=1 SV=2					1	5	1	0	0	1	0	1	0	1	1	24.3692	22.7471	23.6501	30.3119	5.04759	21.2918	325.417	305.698	290.89	361.818	157.19	357.748	14.5657	17.9253	13.0246	13.561	13.8752	15.4837	0	0	0	0	0	0	0	0	0	0	0	0	52.936
896	Q7Z478	DHX29	ATP-dependent RNA helicase DHX29 OS=Homo sapiens OX=9606 GN=DHX29 PE=1 SV=2					1	1	4	3	3	4	2	2	3	3	3	27.1956	25.6259	21.9399	23.6137	37.9742	18.8981	111.383	104.204	101.051	117.837	44.9317	111.509	325.857	257.774	237.184	328.441	226.988	298.92	195.39	164.469	184.031	194.683	158.577	175.932	618.328	537.733	577.478	542.424	431.644	494.308	394.568
897	Q7L2E3	DHX30	ATP-dependent RNA helicase DHX30 OS=Homo sapiens OX=9606 GN=DHX30 PE=1 SV=1					0	1	4	5	4	5	4	4	2	2	4	0	0	0	0	0	0	67.3459	67.7795	64.0549	64.0727	67.2116	59.8223	273.849	251.571	259.946	260.837	227.091	229.469	1155.52	1163.39	1106.11	979.732	822.844	796.139	218.637	199.317	226.634	173.516	157.43	156.518	896.891
898	Q7L7V1	DHX32	Putative pre-mRNA-splicing factor ATP-dependent RNA helicase DHX32 OS=Homo sapiens OX=9606 GN=DHX32 PE=1 SV=1					0	2	1	3	0	1	0	1	2	1	1	0	0	0	0	0	0	197.724	173.964	171.939	201.14	124.508	186.434	182.735	158.885	99.0091	164.658	146.148	147.042	529.663	586.809	532.693	662.395	657.554	587.033	0	0	0	0	0	0	98.2019
899	Q9H6R0	DHX33	ATP-dependent RNA helicase DHX33 OS=Homo sapiens OX=9606 GN=DHX33 PE=1 SV=2					0	0	0	0	0	0	0	1	0	1	2	0	0	0	0	0	0	0	0	0	0	0	0	0	0	0	0	0	0	0	0	0	0	0	0	0	0	0	0	0	0	0
900	Q14147	DHX34	Probable ATP-dependent RNA helicase DHX34 OS=Homo sapiens OX=9606 GN=DHX34 PE=1 SV=2					0	0	2	1	2	2	1	2	0	1	0	0	0	0	0	0	0	0	0	0	0	0	0	152.719	128.607	125.468	157.276	144.004	149.502	130.772	105.367	113.232	143.064	138.28	132.704	200.684	182.52	222.63	223.336	226.935	207.05	33.5973
901	Q9H2U1	DHX36	ATP-dependent DNA/RNA helicase DHX36 OS=Homo sapiens OX=9606 GN=DHX36 PE=1 SV=2					0	0	2	2	0	2	0	1	3	0	0	0	0	0	0	0	0	0	0	0	0	0	0	27.753	22.8669	28.4708	35.2866	23.7697	28.241	131.47	132.426	135.589	168.198	138.594	140.196	0	0	0	0	0	0	256.283
902	Q8IY37	DHX37	Probable ATP-dependent RNA helicase DHX37 OS=Homo sapiens OX=9606 GN=DHX37 PE=1 SV=1					0	0	0	1	1	2	4	3	2	2	3	0	0	0	0	0	0	0	0	0	0	0	0	0	0	0	0	0	0	19.3883	19.4217	21.4542	22.2685	20.8643	19.9944	60.9786	60.0208	59.0408	52.0598	57.6388	44.3678	195.089
903	Q92620	DHX38	Pre-mRNA-splicing factor ATP-dependent RNA helicase PRP16 OS=Homo sapiens OX=9606 GN=DHX38 PE=1 SV=2					3	3	2	2	1	2	2	1	1	0	0	419.889	399.229	388.389	415.992	68.5729	398.98	120.925	122.634	102.693	134.359	64.1344	157.199	129.067	110.497	101.477	133.985	109.891	125.531	134.322	143.733	126.494	173.459	138.942	157.083	25.1739	24.7983	28.0476	32.2161	25.1429	31.0866	100.067
904	Q8IX18	DHX40	Probable ATP-dependent RNA helicase DHX40 OS=Homo sapiens OX=9606 GN=DHX40 PE=1 SV=2					0	3	3	1	0	1	1	2	3	2	3	0	0	0	0	0	0	255.114	242.682	232.204	280.656	63.5417	247.633	383.785	321.993	325.52	414.642	352.596	350.317	350.14	307.315	321.497	413.494	391.633	328.81	0	0	0	0	0	0	395.448
905	Q6P158	DHX57	Putative ATP-dependent RNA helicase DHX57 OS=Homo sapiens OX=9606 GN=DHX57 PE=1 SV=2					0	0	1	1	1	3	1	2	1	2	1	0	0	0	0	0	0	0	0	0	0	0	0	130.351	124.12	109.636	135.136	104.24	126.159	113.219	118.849	105.355	116.865	113.202	124.49	157.521	146.187	140.57	135.268	128.331	129.944	205.347
906	Q14562	DHX8	ATP-dependent RNA helicase DHX8 OS=Homo sapiens OX=9606 GN=DHX8 PE=1 SV=1					1	0	0	0	0	0	0	0	0	0	0	47.8114	53.788	48.0148	46.6237	35.5219	51.1703	0	0	0	0	0	0	0	0	0	0	0	0	0	0	0	0	0	0	0	0	0	0	0	0	0
907	Q08211	DHX9	ATP-dependent RNA helicase A OS=Homo sapiens OX=9606 GN=DHX9 PE=1 SV=4					0	4	4	5	4	4	6	5	3	5	4	0	0	0	0	0	0	343.068	350.042	370.535	412.612	196.123	386.619	213.135	202.537	205.252	229.931	222.104	241.643	287.786	264.513	277.113	329.816	301.251	298.707	657.167	577.659	639.953	620.125	557.201	548.454	1078.64
908	Q9NR28	DIABLO	Diablo homolog, mitochondrial OS=Homo sapiens OX=9606 GN=DIABLO PE=1 SV=1					2	1	1	0	0	0	0	0	0	0	0	75.295	89.3531	84.6091	84.7739	33.0947	78.7404	10.7194	15.7227	12.6157	16.4358	14.8027	14.4643	39.2175	43.2218	35.0874	46.4336	43.1602	53.032	0	0	0	0	0	0	0	0	0	0	0	0	0
909	O60610	DIAPH1	Protein diaphanous homolog 1 OS=Homo sapiens OX=9606 GN=DIAPH1 PE=1 SV=2					3	2	2	3	4	1	2	1	0	1	1	345.692	333.447	342.652	370.402	287.566	301.152	321.894	300.52	298.756	312.208	149.671	357.163	359.129	362.221	338.087	345.607	393.621	409.733	235.665	293.37	259.132	284.139	306.599	305.415	370.084	450.862	443.396	458.854	461.749	468.339	148.399
910	Q9NSV4	DIAPH3	Protein diaphanous homolog 3 OS=Homo sapiens OX=9606 GN=DIAPH3 PE=1 SV=4					0	2	1	3	1	4	0	1	1	0	1	0	0	0	0	0	0	87.9485	74.6604	87.5569	83.1096	92.0348	77.4089	79.2875	66.4885	64.7856	72.7089	65.6972	65.6546	228.493	218.432	223.825	271.314	265.415	258.132	41.677	45.5169	45.9719	48.3922	50.1546	40.4206	560.092
911	Q9UPY3	DICER1	Endoribonuclease Dicer OS=Homo sapiens OX=9606 GN=DICER1 PE=1 SV=3					0	0	0	0	1	1	1	0	3	2	2	0	0	0	0	0	0	0	0	0	0	0	0	0	0	0	0	0	0	0	0	0	0	0	0	14.8318	15.2815	11.7668	15.1479	14.4659	12.9504	152.498
912	Q9BTC0	DIDO1	Death-inducer obliterator 1 OS=Homo sapiens OX=9606 GN=DIDO1 PE=1 SV=5					1	0	0	1	3	0	0	0	0	0	0	29.0242	32.5874	33.758	33.6669	57.0288	29.4706	0	0	0	0	0	0	0	0	0	0	0	0	397.009	284.832	279.232	309.928	227.227	342.238	309.602	275.766	263.484	323.315	238.557	373.961	0
913	Q68CQ4	DIEXF	Digestive organ expansion factor homolog OS=Homo sapiens OX=9606 GN=DIEXF PE=1 SV=2					2	0	0	0	0	0	0	0	0	0	0	149.81	144.677	132.838	154.687	200.547	147.069	0	0	0	0	0	0	0	0	0	0	0	0	0	0	0	0	0	0	0	0	0	0	0	0	0
914	Q9UNQ2	DIMT1	Probable dimethyladenosine transferase OS=Homo sapiens OX=9606 GN=DIMT1 PE=1 SV=1					0	2	3	2	2	2	4	4	4	2	3	0	0	0	0	0	0	93.6499	94.1148	93.8641	103.465	66.7641	83.7775	493.231	499.296	362.445	463.786	404.759	422.317	116.947	89.6546	109.622	111.633	99.1554	82.9768	127.925	127.991	141.883	135.515	121.178	109.089	173.048
915	Q9P265	DIP2B	Disco-interacting protein 2 homolog B OS=Homo sapiens OX=9606 GN=DIP2B PE=1 SV=3					2	0	0	0	0	0	0	0	0	0	0	116.327	107.586	100.914	114.854	53.1741	104.82	0	0	0	0	0	0	0	0	0	0	0	0	0	0	0	0	0	0	0	0	0	0	0	0	0
916	Q9Y2L1	DIS3	Exosome complex exonuclease RRP44 OS=Homo sapiens OX=9606 GN=DIS3 PE=1 SV=2					3	4	3	3	2	2	1	3	0	3	2	133.989	123.826	139.683	151.78	145.691	122.803	346.216	331.21	328.814	371.83	266.501	359.125	175.798	158.725	156.341	176.95	171.095	159.907	199.823	185.469	199.383	231.781	231.642	209.672	137.335	137.924	157.402	137.698	159.692	152.458	238.646
917	Q8IYB7	DIS3L2	DIS3-like exonuclease 2 OS=Homo sapiens OX=9606 GN=DIS3L2 PE=1 SV=4					0	3	3	3	1	0	0	0	2	0	0	0	0	0	0	0	0	171.847	160.336	155.558	171.648	112.278	177.498	276.369	266.26	239.725	279.895	278.274	287.015	94.6555	94.9976	96.6923	107.519	115.841	110.054	74.1791	78.049	94.9717	91.6582	89.8685	81.3307	0
918	O60832	DKC1	H/ACA ribonucleoprotein complex subunit DKC1 OS=Homo sapiens OX=9606 GN=DKC1 PE=1 SV=3					1	2	4	4	3	3	4	4	2	4	3	20.4162	24.3287	22.7269	26.3469	28.9349	19.5354	89.5849	101.297	88.3621	98.7504	83.7244	115.4	320.813	305.91	323.011	364.128	346.414	385.948	285.01	258.568	266.872	224.117	218.548	221.292	280.155	276.63	305.167	260.066	229.633	236.396	362.551
919	P10515	DLAT	Dihydrolipoyllysine-residue acetyltransferase component of pyruvate dehydrogenase complex, mitochondrial OS=Homo sapiens OX=9606 GN=DLAT PE=1 SV=3					0	4	3	3	4	1	2	3	1	2	3	0	0	0	0	0	0	341.359	367.229	458.558	349.312	484.822	261.396	687.454	583.356	566.242	641.547	593.776	795.887	330.914	275.492	284.413	454.84	338.266	379.186	244.213	208.706	219.421	315.81	237.332	235.857	161.379
920	P09622	DLD	Dihydrolipoyl dehydrogenase, mitochondrial OS=Homo sapiens OX=9606 GN=DLD PE=1 SV=2					5	3	1	0	0	0	0	0	0	0	0	171.886	161.778	168.707	177.368	196.529	159.36	201.377	198.54	189.956	197.469	222.692	227.514	97.2771	90.9911	87.7968	114.494	89.8653	103.253	0	0	0	0	0	0	0	0	0	0	0	0	0
921	Q12959	DLG1	Disks large homolog 1 OS=Homo sapiens OX=9606 GN=DLG1 PE=1 SV=2					2	0	0	0	0	0	0	0	0	0	0	86.4942	82.042	83.5627	92.9233	85.4728	80.8766	0	0	0	0	0	0	0	0	0	0	0	0	0	0	0	0	0	0	0	0	0	0	0	0	0
922	Q15398	DLGAP5	Disks large-associated protein 5 OS=Homo sapiens OX=9606 GN=DLGAP5 PE=1 SV=2					0	0	1	3	2	2	3	3	1	2	3	0	0	0	0	0	0	0	0	0	0	0	0	77.9066	65.0178	63.775	83.6638	77.8191	79.1486	122.81	107.299	120.171	146.299	123.787	128.92	101.273	88.7964	97.4954	84.5471	81.8765	93.1419	163.483
923	P36957	DLST	Dihydrolipoyllysine-residue succinyltransferase component of 2-oxoglutarate dehydrogenase complex, mitochondrial OS=Homo sapiens OX=9606 GN=DLST PE=1 SV=4					0	4	4	2	2	1	0	0	0	0	0	0	0	0	0	0	0	394.488	455.751	533.615	520.732	720.442	399.527	344.042	329.648	408.18	383.806	378.03	498.284	156.429	146.596	151.111	176.004	174.694	184.112	52.8889	65.9114	72.1493	64.6907	69.4769	73.2095	89.4422
924	Q9NPF5	DMAP1	DNA methyltransferase 1-associated protein 1 OS=Homo sapiens OX=9606 GN=DMAP1 PE=1 SV=1					0	0	1	0	0	0	0	0	0	0	0	0	0	0	0	0	0	0	0	0	0	0	0	72.2429	80.9548	69.4184	89.3909	73.763	82.1359	0	0	0	0	0	0	0	0	0	0	0	0	0
925	Q9Y485	DMXL1	DmX-like protein 1 OS=Homo sapiens OX=9606 GN=DMXL1 PE=1 SV=3					0	0	0	0	0	0	0	1	0	0	0	0	0	0	0	0	0	0	0	0	0	0	0	0	0	0	0	0	0	0	0	0	0	0	0	0	0	0	0	0	0	0
926	P51530	DNA2	DNA replication ATP-dependent helicase/nuclease DNA2 OS=Homo sapiens OX=9606 GN=DNA2 PE=1 SV=3					0	0	0	0	0	0	0	0	0	0	1	0	0	0	0	0	0	0	0	0	0	0	0	0	0	0	0	0	0	0	0	0	0	0	0	0	0	0	0	0	0	0
927	Q86Y56	DNAAF5	Dynein assembly factor 5, axonemal OS=Homo sapiens OX=9606 GN=DNAAF5 PE=1 SV=4					2	2	3	2	3	3	2	3	4	3	2	228.092	233.412	208.018	257.596	34.5487	222.419	62.3395	66.3107	58.7049	64.3015	31.5739	65.3577	274.33	211.333	280.589	253.798	296.718	288.703	435.279	263.828	394.578	430.269	508.941	454.098	477.93	604.58	637.565	642.626	741.208	643.01	265.049
928	Q9UFH2	DNAH17	Dynein heavy chain 17, axonemal OS=Homo sapiens OX=9606 GN=DNAH17 PE=1 SV=3					1	0	0	0	0	0	0	0	0	0	0	48.8242	51.8385	53.2442	48.0311	47.2607	51.7004	0	0	0	0	0	0	0	0	0	0	0	0	0	0	0	0	0	0	0	0	0	0	0	0	0
929	P31689	DNAJA1	DnaJ homolog subfamily A member 1 OS=Homo sapiens OX=9606 GN=DNAJA1 PE=1 SV=2					4	6	4	6	5	4	4	5	5	6	5	819.851	835.332	835.144	924.114	1017.91	652.655	568.042	494.628	505.022	592.281	572.558	609.334	311.257	276.385	237.981	306.064	301.21	343.02	482.777	486.132	458.727	628.936	576.248	638.894	1159.98	1024.06	1107.96	1262.08	1129.65	1262.3	490.103
930	O60884	DNAJA2	DnaJ homolog subfamily A member 2 OS=Homo sapiens OX=9606 GN=DNAJA2 PE=1 SV=1					2	3	4	4	3	4	3	4	3	4	3	149.249	156.842	166.72	182.104	247.708	136.572	241.867	213.684	226.921	247.313	285.23	258.277	800.345	697.575	681.335	799.084	722.697	770.112	641.251	560.912	554.08	714.081	662.261	688.458	635.453	584.299	596.856	583.255	586.988	593.822	984.407
931	Q96EY1	DNAJA3	DnaJ homolog subfamily A member 3, mitochondrial OS=Homo sapiens OX=9606 GN=DNAJA3 PE=1 SV=2					1	2	4	2	2	3	3	3	4	2	1	24.305	31.3046	26.6418	31.6949	44.2124	25.0309	187.658	168.545	180.941	195.124	43.1777	182.239	369.811	317.393	343.065	438.563	371.156	375.08	290.547	240.719	355.323	391.506	359.691	297.39	397.271	311.534	269.748	229.654	241.13	255.973	266.243
932	Q8WW22	DNAJA4	DnaJ homolog subfamily A member 4 OS=Homo sapiens OX=9606 GN=DNAJA4 PE=1 SV=1					1	0	1	0	0	0	0	0	0	0	0	21.5183	22.6282	23.9908	22.4889	28.1661	20.1375	0	0	0	0	0	0	45.7687	41.839	48.6481	47.2661	45.0403	48.9356	0	0	0	0	0	0	0	0	0	0	0	0	0
933	P25685	DNAJB1	DnaJ homolog subfamily B member 1 OS=Homo sapiens OX=9606 GN=DNAJB1 PE=1 SV=4					1	3	4	1	1	1	0	1	0	0	0	34.1234	38.8756	37.9165	39.8423	464.141	27.9879	612.657	638.507	623.238	691.642	839.753	754.368	264.695	251.995	227.153	241.056	278.14	295.429	23.4832	22.5459	25.5726	30.3017	39.29	36.8918	72.6318	77.4157	77.2974	79.3349	77.8253	87.0897	100.974
934	Q9UBS4	DNAJB11	DnaJ homolog subfamily B member 11 OS=Homo sapiens OX=9606 GN=DNAJB11 PE=1 SV=1					2	4	3	4	3	3	3	3	3	3	3	53.6868	53.9549	55.5374	61.9239	3.30703	46.693	448.145	398.508	402.325	440.72	899.13	441.333	304.427	269.266	279.758	309.233	325.771	346.615	370.407	314.618	322.753	377.379	416.398	431.633	250.56	252.107	268.833	266.317	288.238	266.932	307.959
935	Q9NXW2	DNAJB12	DnaJ homolog subfamily B member 12 OS=Homo sapiens OX=9606 GN=DNAJB12 PE=1 SV=5					0	3	2	1	1	1	0	1	1	0	0	0	0	0	0	0	0	178.413	157.976	174.419	190.843	141.833	160.866	110.123	98.5117	102.192	120.97	110.451	129.32	24.6722	25.6412	29.4636	31.8231	33.1527	30.8315	50.2096	62.168	56.0729	60.4474	56.0553	67.209	42.7621
936	Q9UDY4	DNAJB4	DnaJ homolog subfamily B member 4 OS=Homo sapiens OX=9606 GN=DNAJB4 PE=1 SV=1					3	0	0	0	0	0	0	0	0	0	0	481.889	469.488	414.064	468.693	124.664	458.336	0	0	0	0	0	0	0	0	0	0	0	0	0	0	0	0	0	0	0	0	0	0	0	0	0
937	O75190	DNAJB6	DnaJ homolog subfamily B member 6 OS=Homo sapiens OX=9606 GN=DNAJB6 PE=1 SV=2					0	3	2	1	1	1	1	1	0	1	2	0	0	0	0	0	0	280.615	262.022	284.455	292.955	75.7177	294.016	85.2372	85.3941	75.5316	96.2367	88.902	85.2273	79.088	82.9727	87.4039	102.911	85.3034	95.5105	87.3931	87.7796	116.549	130.042	112.056	117.583	71.5462
938	Q8IXB1	DNAJC10	DnaJ homolog subfamily C member 10 OS=Homo sapiens OX=9606 GN=DNAJC10 PE=1 SV=2					1	0	0	0	0	0	0	0	0	0	0	24.1527	19.9277	19.3875	22.3016	14.9915	23.6705	0	0	0	0	0	0	0	0	0	0	0	0	0	0	0	0	0	0	0	0	0	0	0	0	0
939	Q9NVH1	DNAJC11	DnaJ homolog subfamily C member 11 OS=Homo sapiens OX=9606 GN=DNAJC11 PE=1 SV=2					0	2	1	1	0	0	2	1	0	0	0	0	0	0	0	0	0	142.244	129.952	145.264	133.811	188.936	129.243	15.9912	18.3089	16.3558	19.3035	15.5634	22.4529	70.599	65.3976	65.4544	72.7291	58.8326	96.4307	0	0	0	0	0	0	0
940	O75165	DNAJC13	DnaJ homolog subfamily C member 13 OS=Homo sapiens OX=9606 GN=DNAJC13 PE=1 SV=5					0	0	3	3	2	0	1	0	3	1	1	0	0	0	0	0	0	0	0	0	0	0	0	165.437	154.567	130.694	175.85	153.591	157.174	150.6	161.163	157.396	213.509	204.792	195.865	75.4654	73.1173	76.9897	85.6226	71.2556	85.5056	0
941	Q9Y2G8	DNAJC16	DnaJ homolog subfamily C member 16 OS=Homo sapiens OX=9606 GN=DNAJC16 PE=2 SV=3					0	2	0	0	1	1	2	2	3	2	2	0	0	0	0	0	0	181.993	153.934	170.909	193.057	267.25	146.148	0	0	0	0	0	0	0	0	0	0	0	0	47.7308	57.8463	54.7844	72.3484	64.323	67.2411	66.6629
942	Q9NVM6	DNAJC17	DnaJ homolog subfamily C member 17 OS=Homo sapiens OX=9606 GN=DNAJC17 PE=1 SV=1					1	0	0	0	0	0	0	0	0	0	0	87.7469	96.083	93.0673	99.1278	129.525	116.141	0	0	0	0	0	0	0	0	0	0	0	0	0	0	0	0	0	0	0	0	0	0	0	0	0
943	Q96DA6	DNAJC19	Mitochondrial import inner membrane translocase subunit TIM14 OS=Homo sapiens OX=9606 GN=DNAJC19 PE=1 SV=3					0	1	0	0	0	0	0	0	0	0	0	0	0	0	0	0	0	45.9751	38.3754	42.1025	46.936	53.4644	42.7375	0	0	0	0	0	0	0	0	0	0	0	0	0	0	0	0	0	0	0
944	Q99543	DNAJC2	DnaJ homolog subfamily C member 2 OS=Homo sapiens OX=9606 GN=DNAJC2 PE=1 SV=4					2	0	0	0	0	0	0	0	0	0	0	82.1455	78.2148	84.2602	93.0311	88.8659	80.878	0	0	0	0	0	0	0	0	0	0	0	0	0	0	0	0	0	0	0	0	0	0	0	0	0
945	Q5F1R6	DNAJC21	DnaJ homolog subfamily C member 21 OS=Homo sapiens OX=9606 GN=DNAJC21 PE=1 SV=2					0	0	0	2	0	2	1	0	0	0	0	0	0	0	0	0	0	0	0	0	0	0	0	0	0	0	0	0	0	71.668	49.876	61.1734	90.9826	69.6933	91.2187	0	0	0	0	0	0	78.4417
946	Q13217	DNAJC3	DnaJ homolog subfamily C member 3 OS=Homo sapiens OX=9606 GN=DNAJC3 PE=1 SV=1					1	2	3	1	4	2	1	0	0	0	0	13.1878	17.7318	12.0174	16.6712	5.44595	17.7164	122.394	131.37	115.29	130.63	148.579	131.836	235.642	220.298	212.731	238.105	244.408	245.558	87.9019	78.3638	83.193	92.8978	103.799	94.4838	228.71	216.445	226.267	212.396	198.955	197.021	181.036
947	Q99615	DNAJC7	DnaJ homolog subfamily C member 7 OS=Homo sapiens OX=9606 GN=DNAJC7 PE=1 SV=2					1	2	3	1	2	1	2	0	3	2	1	37.2882	34.4913	38.9994	45.1631	48.3648	36.113	44.2621	41.7858	43.133	41.6885	20.9541	48.6576	135.901	126.091	122.085	151.801	144.324	157.411	18.8808	19.6113	14.3977	19.1517	21.22	24.4394	105.991	99.2087	106.236	120.855	114.419	114.233	23.6965
948	O75937	DNAJC8	DnaJ homolog subfamily C member 8 OS=Homo sapiens OX=9606 GN=DNAJC8 PE=1 SV=2					3	1	0	0	0	0	0	0	0	0	0	162.003	181.193	172.262	190.44	118.583	176.212	51.8616	50.8112	44.2845	48.0225	57.1673	47.6355	0	0	0	0	0	0	0	0	0	0	0	0	0	0	0	0	0	0	0
949	Q8WXX5	DNAJC9	DnaJ homolog subfamily C member 9 OS=Homo sapiens OX=9606 GN=DNAJC9 PE=1 SV=1					2	3	0	1	0	0	0	0	0	0	0	88.3073	99.5029	91.7491	88.4644	119.197	76.0604	195.182	184.584	186.852	202.763	251.479	188.192	0	0	0	0	0	0	25.7993	29.3488	28.1666	22.1453	21.9723	26.9471	0	0	0	0	0	0	0
950	O00429	DNM1L	Dynamin-1-like protein OS=Homo sapiens OX=9606 GN=DNM1L PE=1 SV=2					3	3	1	0	0	0	0	0	0	0	0	233.09	238.177	234.076	254.207	235.901	225.194	214.952	229.122	201.155	241.966	218.619	269.594	49.0781	51.7438	50.3423	52.5574	50.3904	49.9431	0	0	0	0	0	0	0	0	0	0	0	0	0
951	P50570	DNM2	Dynamin-2 OS=Homo sapiens OX=9606 GN=DNM2 PE=1 SV=2					4	3	5	0	1	1	0	2	1	0	2	121.518	122.038	113.542	132.487	33.0413	115.476	247.271	241.109	215.13	235.749	66.0493	233.726	464.679	409.711	403.234	452.257	438.435	395.371	0	0	0	0	0	0	94.003	94.6788	104.47	115.074	115.883	96.5045	256.924
952	Q6XZF7	DNMBP	Dynamin-binding protein OS=Homo sapiens OX=9606 GN=DNMBP PE=1 SV=1					3	3	2	0	1	1	1	1	1	1	0	197.242	197.103	186.4	237.375	86.8729	199.993	130.361	125.729	130.36	126.412	111.64	132.062	76.0667	77.1728	91.2934	84.3646	80.0909	83.1014	0	0	0	0	0	0	33.9629	30.4484	34.634	34.5868	35.657	29.3594	96.071
953	P26358	DNMT1	DNA (cytosine-5)-methyltransferase 1 OS=Homo sapiens OX=9606 GN=DNMT1 PE=1 SV=2					3	2	1	4	3	3	3	4	1	3	4	98.7477	100.784	89.8799	104.417	97.1883	93.8979	122.369	119.764	108.789	127.111	71.675	134.627	54.2754	48.176	42.5143	50.4293	48.368	45.2537	299.973	261.331	268.371	254.271	243.748	219.659	567.558	542.889	544.292	445.64	421	410.941	363.854
954	Q9ULA0	DNPEP	Aspartyl aminopeptidase OS=Homo sapiens OX=9606 GN=DNPEP PE=1 SV=1					0	4	2	0	0	0	0	0	0	0	0	0	0	0	0	0	0	230.801	223.907	250.248	256.186	151.91	231.395	108.974	103.874	92.7528	113.184	108.226	114.607	0	0	0	0	0	0	0	0	0	0	0	0	0
955	O43598	DNPH1	2'-deoxynucleoside 5'-phosphate N-hydrolase 1 OS=Homo sapiens OX=9606 GN=DNPH1 PE=1 SV=1					1	0	0	0	0	0	0	0	0	0	0	109.462	141.54	133.341	132.837	15.7477	127.417	0	0	0	0	0	0	0	0	0	0	0	0	0	0	0	0	0	0	0	0	0	0	0	0	0
956	Q9H147	DNTTIP1	Deoxynucleotidyltransferase terminal-interacting protein 1 OS=Homo sapiens OX=9606 GN=DNTTIP1 PE=1 SV=2					0	0	1	0	1	0	0	0	0	0	0	0	0	0	0	0	0	0	0	0	0	0	0	53.8777	51.4692	50.728	60.9444	46.4878	54.3878	0	0	0	0	0	0	217.468	187.673	214.566	201.241	201.59	210.708	0
957	Q14185	DOCK1	Dedicator of cytokinesis protein 1 OS=Homo sapiens OX=9606 GN=DOCK1 PE=1 SV=2					0	3	0	1	0	3	0	0	0	0	1	0	0	0	0	0	0	177.49	171.187	156.229	176.485	240.462	162.742	0	0	0	0	0	0	179.363	175.095	183.539	232.229	201.928	234.256	0	0	0	0	0	0	250.775
958	Q9H7D0	DOCK5	Dedicator of cytokinesis protein 5 OS=Homo sapiens OX=9606 GN=DOCK5 PE=1 SV=3					0	1	2	1	0	0	0	0	0	0	0	0	0	0	0	0	0	71.0876	76.8393	65.2147	89.1584	66.5564	96.9654	38.046	32.9751	32.7243	43.6507	34.8171	37.9881	25.6217	23.9956	21.3174	32.5098	33.9981	31.1787	0	0	0	0	0	0	0
959	Q96HP0	DOCK6	Dedicator of cytokinesis protein 6 OS=Homo sapiens OX=9606 GN=DOCK6 PE=1 SV=3					0	0	1	0	0	0	0	0	0	0	0	0	0	0	0	0	0	0	0	0	0	0	0	47.7738	38.4506	36.2789	51.3575	42.9073	48.6182	0	0	0	0	0	0	0	0	0	0	0	0	0
960	Q96N67	DOCK7	Dedicator of cytokinesis protein 7 OS=Homo sapiens OX=9606 GN=DOCK7 PE=1 SV=4					1	3	3	4	3	2	2	4	3	2	3	78.073	66.5847	65.2998	71.3702	3.87222	68.8239	131.445	109.56	118.54	135.061	43.6567	138.295	174.67	172.067	153.183	179.053	160.09	165.095	265.411	276.051	266.828	320.037	326.666	305.038	150.699	131.111	158.736	169.911	163.234	143.68	126.589
961	Q9BZ29	DOCK9	Dedicator of cytokinesis protein 9 OS=Homo sapiens OX=9606 GN=DOCK9 PE=1 SV=2					0	0	2	0	0	1	0	0	0	0	0	0	0	0	0	0	0	0	0	0	0	0	0	141.159	117.133	127.249	140.612	126.308	136.89	0	0	0	0	0	0	0	0	0	0	0	0	36.4206
962	Q9BU89	DOHH	Deoxyhypusine hydroxylase OS=Homo sapiens OX=9606 GN=DOHH PE=1 SV=1					2	0	3	0	1	0	0	1	0	0	0	139.127	133.916	120.63	132.655	47.1829	134.413	0	0	0	0	0	0	136.257	150.756	132.738	148.137	136.038	161.199	0	0	0	0	0	0	85.026	90.2762	91.0843	79.4286	72.709	72.7671	0
963	Q86YN1	DOLPP1	Dolichyldiphosphatase 1 OS=Homo sapiens OX=9606 GN=DOLPP1 PE=2 SV=1					2	0	0	0	0	0	0	0	0	0	0	93.8061	95.1228	87.6762	92.5576	21.2768	81.8908	0	0	0	0	0	0	0	0	0	0	0	0	0	0	0	0	0	0	0	0	0	0	0	0	0
964	Q9BVM2	DPCD	Protein DPCD OS=Homo sapiens OX=9606 GN=DPCD PE=1 SV=2					1	0	0	0	0	0	0	0	0	0	0	28.6975	27.4748	29.2332	34.9964	42.4588	24.6715	0	0	0	0	0	0	0	0	0	0	0	0	0	0	0	0	0	0	0	0	0	0	0	0	0
965	Q92785	DPF2	Zinc finger protein ubi-d4 OS=Homo sapiens OX=9606 GN=DPF2 PE=1 SV=2			E3 ligase		0	3	3	2	2	0	0	0	0	0	0	0	0	0	0	0	0	254.06	223.622	246.345	279.53	95.3009	257.786	159.234	150.917	168.548	172.489	172.066	164.907	60.2878	69.4244	65.0802	72.0667	76.3015	83.5845	89.6281	96.6805	93.3939	79.3136	92.4947	93.5138	0
966	Q9BQC3	DPH2	2-(3-amino-3-carboxypropyl)histidine synthase subunit 2 OS=Homo sapiens OX=9606 GN=DPH2 PE=1 SV=1					0	0	2	0	0	0	1	0	2	0	0	0	0	0	0	0	0	0	0	0	0	0	0	64.8421	62.2669	55.4298	74.0086	65.1731	68.6885	0	0	0	0	0	0	0	0	0	0	0	0	0
967	Q9H2P9	DPH5	Diphthine methyl ester synthase OS=Homo sapiens OX=9606 GN=DPH5 PE=1 SV=2					2	0	0	0	0	0	0	0	0	0	0	68.5699	68.0138	63.119	72.3542	86.5207	63.6651	0	0	0	0	0	0	0	0	0	0	0	0	0	0	0	0	0	0	0	0	0	0	0	0	0
968	O60762	DPM1	Dolichol-phosphate mannosyltransferase subunit 1 OS=Homo sapiens OX=9606 GN=DPM1 PE=1 SV=1					1	4	3	4	3	4	4	4	2	3	2	41.8539	31.5363	36.1336	45.9433	49.4357	26.2749	339.348	292.001	299.231	359.399	493.721	279.228	223.751	158.661	156.189	193.869	187.392	200.421	225.996	201.303	215.391	258.099	255.951	230.258	224.729	231.911	255.38	281.692	265.324	263.223	191.948
969	Q9NY33	DPP3	Dipeptidyl peptidase 3 OS=Homo sapiens OX=9606 GN=DPP3 PE=1 SV=2					4	1	0	0	0	0	0	0	0	0	0	126.989	129.73	121.276	130.786	146.495	126.206	18.0636	19.5058	13.5774	17.7619	16.9972	21.7641	0	0	0	0	0	0	0	0	0	0	0	0	0	0	0	0	0	0	0
970	Q9UHL4	DPP7	Dipeptidyl peptidase 2 OS=Homo sapiens OX=9606 GN=DPP7 PE=1 SV=3					1	0	0	0	0	0	0	0	0	0	0	148.395	156.515	143.979	161.397	7.99784	149.955	0	0	0	0	0	0	0	0	0	0	0	0	0	0	0	0	0	0	0	0	0	0	0	0	0
971	Q86TI2	DPP9	Dipeptidyl peptidase 9 OS=Homo sapiens OX=9606 GN=DPP9 PE=1 SV=3					1	0	0	0	0	0	0	0	0	0	0	14.7432	16.9605	14.3676	17.2395	0	17.7104	0	0	0	0	0	0	0	0	0	0	0	0	0	0	0	0	0	0	0	0	0	0	0	0	0
972	Q2PZI1	DPY19L1	Probable C-mannosyltransferase DPY19L1 OS=Homo sapiens OX=9606 GN=DPY19L1 PE=2 SV=1					2	0	0	0	0	0	0	0	0	0	0	155.399	134.071	146.031	146.419	198.584	127.066	0	0	0	0	0	0	0	0	0	0	0	0	0	0	0	0	0	0	0	0	0	0	0	0	0
973	Q9C005	DPY30	Protein dpy-30 homolog OS=Homo sapiens OX=9606 GN=DPY30 PE=1 SV=1					1	0	1	1	2	1	1	1	1	0	2	117.788	198.86	223.244	166.941	213.682	172.718	0	0	0	0	0	0	43.3167	38.1272	43.9264	54.0916	47.8402	50.2436	222.399	198.619	247.919	215.6	235.918	231.276	169.769	171.419	181.146	152.265	179.114	157.712	119.371
974	Q16555	DPYSL2	Dihydropyrimidinase-related protein 2 OS=Homo sapiens OX=9606 GN=DPYSL2 PE=1 SV=1					4	4	1	1	0	0	0	0	0	0	0	151.43	141.835	148.392	165.32	138.894	144.137	137.522	132.23	132.953	145.494	125.427	156.152	39.1122	41.4467	44.664	41.3487	38.235	48.1642	31.2029	23.7344	27.4628	29.1007	25.4175	24.617	0	0	0	0	0	0	0
975	Q14195	DPYSL3	Dihydropyrimidinase-related protein 3 OS=Homo sapiens OX=9606 GN=DPYSL3 PE=1 SV=1					2	0	0	0	0	0	0	0	0	0	0	75.6313	78.9949	69.2781	82.4916	113.81	59.3892	0	0	0	0	0	0	0	0	0	0	0	0	0	0	0	0	0	0	0	0	0	0	0	0	0
976	Q14919	DRAP1	Dr1-associated corepressor OS=Homo sapiens OX=9606 GN=DRAP1 PE=1 SV=3					1	0	0	0	0	0	0	0	0	0	0	50.5302	58.663	61.5744	65.0317	3.90108	63.4497	0	0	0	0	0	0	0	0	0	0	0	0	0	0	0	0	0	0	0	0	0	0	0	0	0
977	Q9Y295	DRG1	Developmentally-regulated GTP-binding protein 1 OS=Homo sapiens OX=9606 GN=DRG1 PE=1 SV=1					2	3	2	1	0	1	1	1	0	1	0	140.465	138.548	109.647	145.022	100.016	133.737	129.215	126.558	112.257	132.069	119.094	134.558	110.434	111.607	97.9378	120.04	105.387	106.352	115.244	131.224	126.168	150.284	129.396	131.564	0	0	0	0	0	0	192.124
978	P55039	DRG2	Developmentally-regulated GTP-binding protein 2 OS=Homo sapiens OX=9606 GN=DRG2 PE=1 SV=1					1	1	1	1	0	0	1	0	0	0	0	92.7079	80.4418	77.4521	98.2919	27.5051	83.3929	107.877	100.24	106.485	102.407	30.9452	107.544	160.939	160.515	127.655	162.086	157.438	137.766	114.005	131.289	133.058	136.282	142.629	133.043	0	0	0	0	0	0	0
979	Q02487	DSC2	Desmocollin-2 OS=Homo sapiens OX=9606 GN=DSC2 PE=1 SV=1					0	1	0	0	0	0	0	0	0	0	0	0	0	0	0	0	0	53.8486	53.1986	50.3214	42.5565	68.3621	42.2305	0	0	0	0	0	0	0	0	0	0	0	0	0	0	0	0	0	0	0
980	Q9BVC3	DSCC1	Sister chromatid cohesion protein DCC1 OS=Homo sapiens OX=9606 GN=DSCC1 PE=1 SV=2					2	1	1	0	0	0	0	0	0	0	0	107.458	101.616	105.63	134.85	153.213	110.693	14.904	12.5061	10.748	12.5226	20.0517	12.1142	39.4255	34.5166	45.1927	41.3012	35.5828	34.6616	0	0	0	0	0	0	0	0	0	0	0	0	0
981	O14972	DSCR3	Down syndrome critical region protein 3 OS=Homo sapiens OX=9606 GN=DSCR3 PE=2 SV=1					1	2	1	0	0	0	0	0	1	0	0	84.5159	72.6192	74.3976	86.7031	103.241	78.3971	135.185	127.121	125.853	131.292	175.381	132.983	73.333	65.9293	58.814	70.2001	59.1478	70.8533	0	0	0	0	0	0	0	0	0	0	0	0	0
982	Q14126	DSG2	Desmoglein-2 OS=Homo sapiens OX=9606 GN=DSG2 PE=1 SV=2					3	3	3	2	1	1	0	3	2	2	2	127.454	142.195	133.973	136.093	72.6069	110.256	148.177	172.077	138.445	165.375	202.681	141.909	277.045	263.967	252.768	275.71	292.622	274.302	77.5933	83.8436	86.6801	100.498	109.344	138.679	80.2691	87.2185	84.8834	97.7584	110.015	159.995	166.642
983	Q03001	DST	Dystonin OS=Homo sapiens OX=9606 GN=DST PE=1 SV=4					0	0	0	0	0	0	0	1	2	0	2	0	0	0	0	0	0	0	0	0	0	0	0	0	0	0	0	0	0	0	0	0	0	0	0	0	0	0	0	0	0	0
984	P60981	DSTN	Destrin OS=Homo sapiens OX=9606 GN=DSTN PE=1 SV=3					3	3	1	2	0	1	1	1	1	1	2	511.498	523.533	481.427	551.429	552.505	515.465	219.991	237.61	232.29	233.808	164.314	239.74	67.4767	63.4859	59.7713	62.2771	66.9436	58.4536	88.7735	104.823	96.8251	93.4889	104.08	88.8786	0	0	0	0	0	0	91.8336
985	Q8TEA8	DTD1	D-aminoacyl-tRNA deacylase 1 OS=Homo sapiens OX=9606 GN=DTD1 PE=1 SV=2					1	0	0	0	0	0	0	0	0	0	0	37.153	38.1514	44.8071	43.7551	188.76	35.8897	0	0	0	0	0	0	0	0	0	0	0	0	0	0	0	0	0	0	0	0	0	0	0	0	0
986	Q9NZJ0	DTL	Denticleless protein homolog OS=Homo sapiens OX=9606 GN=DTL PE=1 SV=3					0	0	0	0	0	0	0	0	1	1	0	0	0	0	0	0	0	0	0	0	0	0	0	0	0	0	0	0	0	0	0	0	0	0	0	0	0	0	0	0	0	0
987	Q86UW9	DTX2	Probable E3 ubiquitin-protein ligase DTX2 OS=Homo sapiens OX=9606 GN=DTX2 PE=1 SV=3			E3 ligase		0	0	0	0	0	1	0	0	0	0	0	0	0	0	0	0	0	0	0	0	0	0	0	0	0	0	0	0	0	0	0	0	0	0	0	0	0	0	0	0	0	21.7005
988	P23919	DTYMK	Thymidylate kinase OS=Homo sapiens OX=9606 GN=DTYMK PE=1 SV=4					2	0	0	0	0	0	0	0	0	0	0	58.1855	58.2153	67.6142	77.4823	8.46855	66.9951	0	0	0	0	0	0	0	0	0	0	0	0	0	0	0	0	0	0	0	0	0	0	0	0	0
989	Q6P1R4	DUS1L	tRNA-dihydrouridine(16/17) synthase [NAD(P)(+)]-like OS=Homo sapiens OX=9606 GN=DUS1L PE=1 SV=1					0	0	0	0	1	1	0	0	0	2	0	0	0	0	0	0	0	0	0	0	0	0	0	0	0	0	0	0	0	0	0	0	0	0	0	131.026	115.596	127.291	129.606	130.124	123.739	130.267
990	Q9NX74	DUS2	tRNA-dihydrouridine(20) synthase [NAD(P)+]-like OS=Homo sapiens OX=9606 GN=DUS2 PE=1 SV=1					0	0	1	1	0	1	0	1	1	2	2	0	0	0	0	0	0	0	0	0	0	0	0	132.542	120.312	121.94	144.328	146.841	132.962	29.5048	23.8755	28.5868	32.7491	32.8861	36.25	0	0	0	0	0	0	96.4991
991	Q96G46	DUS3L	tRNA-dihydrouridine(47) synthase [NAD(P)(+)]-like OS=Homo sapiens OX=9606 GN=DUS3L PE=1 SV=2					0	1	1	1	1	1	0	1	1	0	0	0	0	0	0	0	0	105.224	109.891	106.401	121.6	49.5579	118.711	211.293	178.259	164.195	209.319	177.44	187.918	214.778	186.489	184.748	229.564	248.096	225.079	115.839	104.711	121.627	111.343	133.151	118.282	363.169
992	Q9UNI6	DUSP12	Dual specificity protein phosphatase 12 OS=Homo sapiens OX=9606 GN=DUSP12 PE=1 SV=1				Phosphatase	1	2	3	3	2	3	1	2	0	2	0	18.5318	16.1255	20.1886	20.5592	26.558	15.7732	176.397	173.633	181.743	197.125	73.5303	181.929	305.557	304.257	323.032	369.291	330.006	284.4	234.082	233.729	212.091	359.646	268.316	286.102	169.488	176.034	203.673	285.432	248.747	249.076	300.075
993	Q9BVJ7	DUSP23	Dual specificity protein phosphatase 23 OS=Homo sapiens OX=9606 GN=DUSP23 PE=1 SV=1				Phosphatase	0	0	0	0	1	0	0	0	0	0	0	0	0	0	0	0	0	0	0	0	0	0	0	0	0	0	0	0	0	0	0	0	0	0	0	35.5211	27.7192	34.0242	34.988	25.9939	39.3589	0
994	Q13115	DUSP4	Dual specificity protein phosphatase 4 OS=Homo sapiens OX=9606 GN=DUSP4 PE=1 SV=1				Phosphatase	0	0	0	0	0	0	0	1	1	0	0	0	0	0	0	0	0	0	0	0	0	0	0	0	0	0	0	0	0	0	0	0	0	0	0	0	0	0	0	0	0	0
995	Q16828	DUSP6	Dual specificity protein phosphatase 6 OS=Homo sapiens OX=9606 GN=DUSP6 PE=1 SV=2				Phosphatase	0	1	1	0	0	0	0	1	0	0	0	0	0	0	0	0	0	27.7197	24.9067	25.3459	25.2547	31.9271	16.8942	203.85	170.296	159.847	136.7	117.969	104.24	0	0	0	0	0	0	0	0	0	0	0	0	0
996	Q99956	DUSP9	Dual specificity protein phosphatase 9 OS=Homo sapiens OX=9606 GN=DUSP9 PE=1 SV=1				Phosphatase	0	2	2	1	1	2	3	4	2	3	1	0	0	0	0	0	0	183.619	160.879	177.94	199.605	36.9932	174.029	168.06	160.969	133.31	160.089	161.576	151.42	59.4414	61.9216	66.8981	75.9749	77.9253	84.4721	125.406	117.492	134.131	133.414	138.902	141.125	144.754
997	P33316	DUT	Deoxyuridine 5'-triphosphate nucleotidohydrolase, mitochondrial OS=Homo sapiens OX=9606 GN=DUT PE=1 SV=4					2	1	1	0	0	0	0	0	0	0	0	70.7123	81.3619	83.5738	81.9223	15.0794	88.111	45.2265	45.728	49.8144	52.0999	13.4694	52.4348	15.1535	12.5884	16.9787	17.0793	18.535	17.1283	0	0	0	0	0	0	0	0	0	0	0	0	0
998	O14641	DVL2	Segment polarity protein dishevelled homolog DVL-2 OS=Homo sapiens OX=9606 GN=DVL2 PE=1 SV=1					0	0	2	0	0	0	0	0	0	0	0	0	0	0	0	0	0	0	0	0	0	0	0	67.6235	60.3034	60.1259	65.4299	72.3912	62.5745	0	0	0	0	0	0	0	0	0	0	0	0	0
999	Q14204	DYNC1H1	Cytoplasmic dynein 1 heavy chain 1 OS=Homo sapiens OX=9606 GN=DYNC1H1 PE=1 SV=5					1	9	10	4	4	5	3	5	5	4	1	12.798	14.7156	12.2247	17.7793	25.4528	8.63815	546.751	515.473	522.82	611.221	454.412	493.062	860.067	734.545	684.003	761.242	751.238	843.769	316.838	280.941	295.159	319.524	327.347	362.216	396.394	399.923	434.94	495.674	387.8	494.23	290.99
1000	Q13409	DYNC1I2	Cytoplasmic dynein 1 intermediate chain 2 OS=Homo sapiens OX=9606 GN=DYNC1I2 PE=1 SV=3					0	4	5	4	4	3	2	2	2	2	3	0	0	0	0	0	0	509.425	476.046	495.642	563.449	671.308	422.389	819.323	687.804	738.554	800.83	791.406	822.373	365.399	301.444	351.37	394.305	369.192	424.934	568.008	463.92	544.206	548.349	542.124	627.247	265.887
1001	Q9Y6G9	DYNC1LI1	Cytoplasmic dynein 1 light intermediate chain 1 OS=Homo sapiens OX=9606 GN=DYNC1LI1 PE=1 SV=3					1	8	6	3	4	3	3	4	1	2	3	59.0896	68.4078	71.7174	71.5489	97.7514	45.6371	323.136	309.475	311.159	359.923	357.924	278.389	434.071	356.4	386.174	390.675	369.229	475.797	158.103	135.822	144.497	177.317	158.36	245.789	214.818	204.173	205.966	204.642	187.243	247.482	106.791
1002	O43237	DYNC1LI2	Cytoplasmic dynein 1 light intermediate chain 2 OS=Homo sapiens OX=9606 GN=DYNC1LI2 PE=1 SV=1					1	4	3	3	2	2	1	0	0	1	0	20.3023	19.1165	15.4067	17.9262	24.6371	15.938	289.395	268.053	279.049	310.333	360.758	271.821	236.075	210.649	229.819	253.104	241.907	241.632	182.554	159.119	163.624	179.763	176.139	203.049	187.812	177.744	177.695	183.287	172.552	230.91	197.148
1003	P63167	DYNLL1	Dynein light chain 1, cytoplasmic OS=Homo sapiens OX=9606 GN=DYNLL1 PE=1 SV=1					0	1	1	0	1	0	0	0	1	1	0	0	0	0	0	0	0	402.278	461.386	405.438	505.272	703.864	507.563	245.544	262.454	231.945	344.362	313.7	320.877	0	0	0	0	0	0	572.631	610.27	676.147	636.071	699.989	606.096	0
1004	Q96FJ2	DYNLL2	Dynein light chain 2, cytoplasmic OS=Homo sapiens OX=9606 GN=DYNLL2 PE=1 SV=1					1	0	1	1	1	0	1	1	0	0	1	108.203	166.001	160.797	145.291	199.49	140.447	0	0	0	0	0	0	136.702	140.704	119.362	171.972	157.165	163.531	113.557	115.264	136.79	119.612	138.024	121.803	109.354	126.919	129.466	116.802	121.814	107.682	0
1005	Q9NP97	DYNLRB1	Dynein light chain roadblock-type 1 OS=Homo sapiens OX=9606 GN=DYNLRB1 PE=1 SV=3					0	1	0	0	0	0	0	1	0	0	0	0	0	0	0	0	0	246.765	235.02	221.606	327.153	12.0875	259.027	0	0	0	0	0	0	0	0	0	0	0	0	0	0	0	0	0	0	0
1006	P63172	DYNLT1	Dynein light chain Tctex-type 1 OS=Homo sapiens OX=9606 GN=DYNLT1 PE=1 SV=1					0	2	2	0	0	1	0	0	1	0	0	0	0	0	0	0	0	198.568	201.449	215.71	255.209	352.831	176.754	487.938	429.85	327.417	489.996	432.247	475.895	0	0	0	0	0	0	0	0	0	0	0	0	54.0128
1007	O75923	DYSF	Dysferlin OS=Homo sapiens OX=9606 GN=DYSF PE=1 SV=1					0	2	1	1	1	0	1	0	1	0	2	0	0	0	0	0	0	99.3567	86.0732	82.1968	101.473	105.651	123.084	93.9415	74.2032	65.1491	86.639	61.6099	185.524	210.969	174.417	149.797	326.711	166.706	638.009	185.678	147.042	151.127	275.05	129.183	597.337	0
1008	O00716	E2F3	Transcription factor E2F3 OS=Homo sapiens OX=9606 GN=E2F3 PE=1 SV=1					1	0	0	0	0	0	0	0	0	0	0	118.41	117.923	116.85	126.489	24.1644	105.47	0	0	0	0	0	0	0	0	0	0	0	0	0	0	0	0	0	0	0	0	0	0	0	0	0
1009	O75461	E2F6	Transcription factor E2F6 OS=Homo sapiens OX=9606 GN=E2F6 PE=1 SV=1					0	0	0	1	0	0	0	0	0	0	0	0	0	0	0	0	0	0	0	0	0	0	0	0	0	0	0	0	0	114.957	101.259	98.4997	106.353	98.437	93.8374	0	0	0	0	0	0	0
1010	Q56P03	EAPP	E2F-associated phosphoprotein OS=Homo sapiens OX=9606 GN=EAPP PE=1 SV=4					0	2	1	0	1	0	0	0	0	1	0	0	0	0	0	0	0	146.905	153.461	151.941	157.109	251.963	146.671	40.8705	42.6414	35.8028	47.3509	43.5231	42.4978	0	0	0	0	0	0	29.8898	26.0963	28.5836	29.9169	23.6228	26.9917	0
1011	Q5JPH6	EARS2	Probable glutamate--tRNA ligase, mitochondrial OS=Homo sapiens OX=9606 GN=EARS2 PE=1 SV=2					0	2	3	0	2	2	3	0	0	3	1	0	0	0	0	0	0	76.4521	69.9681	77.7553	95.558	84.8489	75.1334	115.155	113.501	91.6421	117.307	108.75	117.006	0	0	0	0	0	0	103.409	101.651	113.469	128.531	130.655	115.117	182.373
1012	Q99848	EBNA1BP2	Probable rRNA-processing protein EBP2 OS=Homo sapiens OX=9606 GN=EBNA1BP2 PE=1 SV=2					0	0	0	3	4	3	5	5	6	4	5	0	0	0	0	0	0	0	0	0	0	0	0	0	0	0	0	0	0	233.763	219.716	198.533	115.16	121.573	107.047	430.285	399.843	349.456	255.846	235.784	247.031	251.339
1013	O95905	ECD	Protein ecdysoneless homolog OS=Homo sapiens OX=9606 GN=ECD PE=1 SV=1					1	0	3	2	3	1	1	1	0	1	1	13.6121	15.5023	17.4985	18.371	70.8742	10.259	0	0	0	0	0	0	155.307	139.303	159.084	179.845	130.091	154.23	146.091	132.667	150.155	171.02	165.155	161.429	244.172	234.047	281.565	282.053	265.762	258.052	212.607
1014	P42892	ECE1	Endothelin-converting enzyme 1 OS=Homo sapiens OX=9606 GN=ECE1 PE=1 SV=2					2	0	0	0	0	0	0	0	0	0	0	70.0777	78.713	66.5441	78.1744	98.6473	63.5058	0	0	0	0	0	0	0	0	0	0	0	0	0	0	0	0	0	0	0	0	0	0	0	0	0
1015	Q13011	ECH1	Delta(3,5)-Delta(2,4)-dienoyl-CoA isomerase, mitochondrial OS=Homo sapiens OX=9606 GN=ECH1 PE=1 SV=2					2	1	0	0	0	0	0	0	0	0	0	137.863	147.244	147.494	153.571	162.372	150.173	159.007	164.263	141.065	158.953	192.182	194.279	0	0	0	0	0	0	0	0	0	0	0	0	0	0	0	0	0	0	0
1016	Q9NTX5	ECHDC1	Ethylmalonyl-CoA decarboxylase OS=Homo sapiens OX=9606 GN=ECHDC1 PE=1 SV=2					1	4	3	2	2	3	4	2	2	2	2	37.9022	45.8062	45.5676	50.94	68.5959	39.0143	286.146	252.225	259.545	297.676	260.578	266.898	115.341	97.7818	105.697	112.009	97.3119	104.945	67.622	61.8499	70.5282	89.1223	75.0457	66.612	89.849	88.1954	91.1185	93.9873	85.4268	88.0558	162.85
1017	P30084	ECHS1	Enoyl-CoA hydratase, mitochondrial OS=Homo sapiens OX=9606 GN=ECHS1 PE=1 SV=4					3	0	0	0	0	0	0	0	0	0	0	214.266	227.724	225.846	227.848	334.686	214.606	0	0	0	0	0	0	0	0	0	0	0	0	0	0	0	0	0	0	0	0	0	0	0	0	0
1018	P42126	ECI1	Enoyl-CoA delta isomerase 1, mitochondrial OS=Homo sapiens OX=9606 GN=ECI1 PE=1 SV=1					2	2	1	0	0	0	0	0	0	0	0	93.5499	129.588	131.578	130.523	12.9902	128.795	49.4465	49.0943	47.0923	55.3149	23.6639	59.4014	54.5036	52.6154	43.4119	60.9872	57.7458	49.5808	0	0	0	0	0	0	0	0	0	0	0	0	0
1019	O75521	ECI2	Enoyl-CoA delta isomerase 2, mitochondrial OS=Homo sapiens OX=9606 GN=ECI2 PE=1 SV=4					1	0	0	0	0	0	0	0	0	0	0	157.876	143.12	130.063	154.64	189.431	147.364	0	0	0	0	0	0	0	0	0	0	0	0	0	0	0	0	0	0	0	0	0	0	0	0	0
1020	Q5VYK3	ECPAS	Proteasome adapter and scaffold protein ECM29 OS=Homo sapiens OX=9606 GN=ECPAS PE=1 SV=2					3	3	3	4	1	2	3	2	2	2	2	220.004	221.333	225.36	287.954	142.912	208.128	118.015	105.243	113.684	122.708	151.565	113.03	315.303	264.681	302.913	329.815	313.544	321.295	451.689	434.53	489.178	530.13	533.191	535.339	52.9658	48.0077	58.1357	59.3465	57.4692	57.2851	180.383
1021	Q9BQ95	ECSIT	Evolutionarily conserved signaling intermediate in Toll pathway, mitochondrial OS=Homo sapiens OX=9606 GN=ECSIT PE=1 SV=1					0	0	0	1	0	0	0	1	0	0	0	0	0	0	0	0	0	0	0	0	0	0	0	0	0	0	0	0	0	27.9052	26.5186	33.1219	32.7806	31.9675	38.7686	0	0	0	0	0	0	0
1022	Q9H8V3	ECT2	Protein ECT2 OS=Homo sapiens OX=9606 GN=ECT2 PE=1 SV=4					0	1	3	2	3	3	4	5	2	3	2	0	0	0	0	0	0	43.0236	38.0244	47.124	48.4241	42.9046	41.6147	117.232	111.311	116.461	119.405	109.021	116.128	395.401	410.772	409.574	423.373	410.998	397.825	459.572	426.354	486.459	484.06	428.861	435.493	232.969
1023	Q96F86	EDC3	Enhancer of mRNA-decapping protein 3 OS=Homo sapiens OX=9606 GN=EDC3 PE=1 SV=1					1	2	0	0	0	0	1	1	0	1	1	44.7204	40.578	45.148	58.7613	2.96881	48.7211	279.696	258.459	267.123	307.785	45.057	308.573	0	0	0	0	0	0	0	0	0	0	0	0	0	0	0	0	0	0	0
1024	Q6P2E9	EDC4	Enhancer of mRNA-decapping protein 4 OS=Homo sapiens OX=9606 GN=EDC4 PE=1 SV=1					1	2	5	4	1	2	0	1	1	0	2	96.8951	97.1416	85.9235	118.253	4.81773	90.0221	76.0781	60.3716	59.4064	64.0028	49.2542	64.8612	190.404	179.162	181.792	198.782	198.227	183.479	478.136	507.362	583.484	597.744	659.867	616.961	25.7501	32.1727	34.9002	30.4323	32.1271	33.5816	122.138
1025	O60869	EDF1	Endothelial differentiation-related factor 1 OS=Homo sapiens OX=9606 GN=EDF1 PE=1 SV=1					1	0	0	0	0	3	4	4	3	4	3	55.2298	81.7237	79.0644	36.4371	0	39.4266	0	0	0	0	0	0	0	0	0	0	0	0	0	0	0	0	0	0	0	0	0	0	0	0	131.463
1026	Q3B7T1	EDRF1	Erythroid differentiation-related factor 1 OS=Homo sapiens OX=9606 GN=EDRF1 PE=1 SV=1					0	2	3	1	3	1	1	2	3	0	0	0	0	0	0	0	0	242.741	234.678	243.323	273.078	349.677	260.332	243.403	199.285	205.14	228.051	217.106	217.262	168.142	182.546	191.403	229.774	230.272	231.422	400.864	388.704	491.344	510.867	496.169	474.33	79.5371
1027	Q15075	EEA1	Early endosome antigen 1 OS=Homo sapiens OX=9606 GN=EEA1 PE=1 SV=2					3	0	0	0	0	0	0	0	0	0	0	256.501	254.508	229.215	258.498	345.889	244.094	0	0	0	0	0	0	0	0	0	0	0	0	0	0	0	0	0	0	0	0	0	0	0	0	0
1028	O75530	EED	Polycomb protein EED OS=Homo sapiens OX=9606 GN=EED PE=1 SV=2					0	1	1	0	0	0	0	2	0	0	0	0	0	0	0	0	0	110.192	96.1109	98.1824	106.11	44.6515	108.741	136.004	126.106	113.735	135.631	134.729	122.138	0	0	0	0	0	0	0	0	0	0	0	0	0
1029	P68104	EEF1A1	Elongation factor 1-alpha 1 OS=Homo sapiens OX=9606 GN=EEF1A1 PE=1 SV=1					5	6	5	5	4	8	4	3	4	3	4	359.533	336.216	352.738	390.227	235.372	361.353	928.638	892.216	859.031	868.558	994.666	940.824	733.966	701.463	764.4	769.979	712.745	714.313	892.536	810.299	935.006	942.478	931.607	871.364	1033.68	1051.21	1186.41	1097.42	1111.74	1084.81	1582.1
1030	Q05639	EEF1A2	Elongation factor 1-alpha 2 OS=Homo sapiens OX=9606 GN=EEF1A2 PE=1 SV=1					4	4	6	5	4	5	3	3	4	3	2	567.434	545.708	587.509	648.365	619.158	500.028	451.688	434.701	416.592	428.163	450.976	477.67	821.334	632.765	928.78	1196.9	975.817	814.313	689.525	635.934	1018.27	872.559	850.455	621.913	703.943	730.474	885.551	810.737	768.141	701.023	948.026
1031	P24534	EEF1B2	Elongation factor 1-beta OS=Homo sapiens OX=9606 GN=EEF1B2 PE=1 SV=3					3	4	5	2	4	4	4	5	5	4	4	118.718	133.003	121.205	129.813	168.527	110.519	636.141	520.372	550.984	525.86	416.912	541.187	644.364	556.838	516.228	564.247	650.866	612.322	247.919	182.728	205.951	218.211	250.015	245.531	625.478	576.309	626.034	563.037	632.631	583.561	628.645
1032	P29692	EEF1D	Elongation factor 1-delta OS=Homo sapiens OX=9606 GN=EEF1D PE=1 SV=5					2	5	4	5	4	4	4	4	5	3	3	108.96	98.7996	116.742	129.395	775.351	87.6198	941.686	910.101	906.466	966.158	692.059	996.5	660.474	602.332	659.263	736.292	732.468	668.669	435.858	367.098	512.625	472.825	524.563	485.026	554.975	569.009	622.69	538.736	616.316	537.874	735.504
1033	O43324	EEF1E1	Eukaryotic translation elongation factor 1 epsilon-1 OS=Homo sapiens OX=9606 GN=EEF1E1 PE=1 SV=1					0	3	3	1	1	0	4	3	3	3	2	0	0	0	0	0	0	203.506	193.274	208.98	267.383	171.803	275.319	175.667	162.379	162.49	243.596	207.017	268.222	13.7019	13.5439	15.086	18.9115	17.8576	23.1697	72.9186	70.5413	78.721	101.211	95.2781	120.568	0
1034	P26641	EEF1G	Elongation factor 1-gamma OS=Homo sapiens OX=9606 GN=EEF1G PE=1 SV=3					4	4	3	5	4	3	3	4	3	2	2	403.869	395.143	396.767	460.481	97.9824	397.613	671.351	619.274	631.988	652.789	764.201	648.3	351.96	300.272	289.627	318.669	341.52	329.707	697.234	577.78	719.829	714.582	743.582	697.87	761.578	739.651	847.448	669.513	722.958	697.235	680.485
1035	P13639	EEF2	Elongation factor 2 OS=Homo sapiens OX=9606 GN=EEF2 PE=1 SV=4					5	7	6	4	7	8	8	9	9	9	9	362.411	339.101	304.163	368.422	346.919	356.781	331.495	320.987	360.78	346.397	773.627	308.793	706.057	663.222	655.004	541.932	499.188	473.894	1269.3	807.797	844.358	395.916	417.692	393.399	1847.94	1259.37	1114.51	739.494	745.741	689.743	2508.95
1036	Q96C19	EFHD2	EF-hand domain-containing protein D2 OS=Homo sapiens OX=9606 GN=EFHD2 PE=1 SV=1					3	0	0	0	0	0	0	0	0	0	0	283.964	494.105	515.734	406.45	19.6016	411.079	0	0	0	0	0	0	0	0	0	0	0	0	0	0	0	0	0	0	0	0	0	0	0	0	0
1037	Q7Z2Z2	EFL1	Elongation factor-like GTPase 1 OS=Homo sapiens OX=9606 GN=EFL1 PE=1 SV=2					0	0	1	2	0	2	0	2	1	0	0	0	0	0	0	0	0	0	0	0	0	0	0	66.7788	65.1198	58.2219	69.8197	67.3242	69.4843	148.517	163.9	145.588	168.709	170.944	180.546	0	0	0	0	0	0	86.1178
1038	Q14156	EFR3A	Protein EFR3 homolog A OS=Homo sapiens OX=9606 GN=EFR3A PE=1 SV=2					0	1	0	0	1	1	0	0	0	0	0	0	0	0	0	0	0	142.249	143.814	135.075	146.84	142.675	122.975	0	0	0	0	0	0	0	0	0	0	0	0	108.563	110.772	120.202	121.768	120.705	128.223	170.508
1039	Q15029	EFTUD2	116 kDa U5 small nuclear ribonucleoprotein component OS=Homo sapiens OX=9606 GN=EFTUD2 PE=1 SV=1					4	5	5	4	5	5	5	4	5	3	4	262.371	275.406	268.524	295.163	241.164	242.919	364.952	357.152	397.09	390.1	426.588	335.367	273.926	223.099	246.358	333.394	298.222	250.533	364.599	329.927	354.297	293.474	280.767	258.434	683.798	641.883	740.965	704.172	691.884	644.496	700.359
1040	P00533	EGFR	Epidermal growth factor receptor OS=Homo sapiens OX=9606 GN=EGFR PE=1 SV=2				Kinase	0	0	2	0	0	0	0	0	0	0	0	0	0	0	0	0	0	0	0	0	0	0	0	69.1632	55.2625	65.8879	75.4822	75.4061	70.7	0	0	0	0	0	0	0	0	0	0	0	0	0
1041	Q9GZT9	EGLN1	Egl nine homolog 1 OS=Homo sapiens OX=9606 GN=EGLN1 PE=1 SV=1					1	0	0	0	0	0	0	0	0	0	0	25.1491	20.884	21.4667	21.0125	34.2304	21.1437	0	0	0	0	0	0	0	0	0	0	0	0	0	0	0	0	0	0	0	0	0	0	0	0	0
1042	Q8N3D4	EHBP1L1	EH domain-binding protein 1-like protein 1 OS=Homo sapiens OX=9606 GN=EHBP1L1 PE=1 SV=2					0	3	4	2	0	0	3	1	2	2	2	0	0	0	0	0	0	95.9374	92.9884	97.928	102.233	92.111	92.6968	214.374	209.145	197.611	231.811	242.117	217.926	116.777	120.971	118.45	117.349	134.934	107.193	0	0	0	0	0	0	0
1043	Q9H4M9	EHD1	EH domain-containing protein 1 OS=Homo sapiens OX=9606 GN=EHD1 PE=1 SV=2					2	0	1	0	0	0	0	0	0	0	0	88.2213	87.2439	92.5287	94.4316	37.6737	92.4938	0	0	0	0	0	0	22.727	21.4712	22.7866	21.7016	24.0087	27.3524	0	0	0	0	0	0	0	0	0	0	0	0	0
1044	Q9NZN4	EHD2	EH domain-containing protein 2 OS=Homo sapiens OX=9606 GN=EHD2 PE=1 SV=2					2	0	0	0	0	0	0	0	0	0	0	191.033	201.679	194.014	226.228	36.7362	194.021	0	0	0	0	0	0	0	0	0	0	0	0	0	0	0	0	0	0	0	0	0	0	0	0	0
1045	Q9H223	EHD4	EH domain-containing protein 4 OS=Homo sapiens OX=9606 GN=EHD4 PE=1 SV=1					2	2	0	0	0	0	0	0	0	0	0	82.7694	79.376	83.9477	86.0911	113.496	75.998	169.241	166.785	164.338	172.425	183.363	181.161	0	0	0	0	0	0	0	0	0	0	0	0	0	0	0	0	0	0	0
1046	Q9H9B1	EHMT1	Histone-lysine N-methyltransferase EHMT1 OS=Homo sapiens OX=9606 GN=EHMT1 PE=1 SV=4					0	1	0	0	0	0	0	0	0	0	0	0	0	0	0	0	0	101.779	112.385	102.439	109.641	159.691	100.903	0	0	0	0	0	0	0	0	0	0	0	0	0	0	0	0	0	0	0
1047	Q96KQ7	EHMT2	Histone-lysine N-methyltransferase EHMT2 OS=Homo sapiens OX=9606 GN=EHMT2 PE=1 SV=3					0	1	1	0	0	0	0	0	0	0	0	0	0	0	0	0	0	33.3147	34.4131	32.521	38.2644	27.1813	33.9014	84.5459	79.3435	73.0044	94.3612	83.9679	71.791	0	0	0	0	0	0	0	0	0	0	0	0	0
1048	P41567	EIF1	Eukaryotic translation initiation factor 1 OS=Homo sapiens OX=9606 GN=EIF1 PE=1 SV=1					1	0	2	1	1	1	0	0	0	0	1	50.5318	76.5738	73.7399	68.6254	20.5298	79.8929	0	0	0	0	0	0	101.941	111.371	100.706	134.337	129.796	118.854	108.883	110.956	120.038	113.507	123.583	119.79	60.8742	70.1297	77.1807	80.1826	77.969	73.627	76.8045
1049	Q8N9N8	EIF1AD	Probable RNA-binding protein EIF1AD OS=Homo sapiens OX=9606 GN=EIF1AD PE=1 SV=1					3	0	1	0	0	0	0	0	0	0	0	166.166	170.671	169.116	175.181	186.845	162.196	0	0	0	0	0	0	81.4276	76.3786	76.4931	90.6468	79.234	87.0658	0	0	0	0	0	0	0	0	0	0	0	0	0
1050	P47813	EIF1AX	Eukaryotic translation initiation factor 1A, X-chromosomal OS=Homo sapiens OX=9606 GN=EIF1AX PE=1 SV=2					2	2	3	1	1	4	2	3	3	3	2	160.333	193.459	160.083	208.633	278.376	169.65	378.139	380.472	397.084	391.975	475.506	362.122	388.869	308.313	341.898	422.662	351.702	373.101	243.086	202.315	239.111	244.558	242.992	215.507	51.4627	54.2129	44.6869	41.7602	45.3462	39.5806	482.311
1051	Q9BY44	EIF2A	Eukaryotic translation initiation factor 2A OS=Homo sapiens OX=9606 GN=EIF2A PE=1 SV=3					1	2	3	4	4	3	1	4	3	3	3	14.6653	14.3213	12.49	19.5617	6.10314	12.6963	297.396	286.527	299.124	322.348	280.15	309.706	199.987	183.649	194.116	197.095	183.916	201.769	291.155	257.294	285.865	305.985	285.542	305.434	443.917	402.736	421.518	403.169	386.732	407.237	697.033
1052	P19525	EIF2AK2	Interferon-induced, double-stranded RNA-activated protein kinase OS=Homo sapiens OX=9606 GN=EIF2AK2 PE=1 SV=2				Kinase	0	4	2	4	3	3	3	3	6	4	5	0	0	0	0	0	0	387.102	381.119	417.814	453.389	328.036	432.661	211.766	212.123	189.512	242.52	233.263	246.77	419.282	390.091	432.528	518.134	485.694	481.643	312.882	259.296	316.566	324.655	298.553	299.786	583.34
1053	Q14232	EIF2B1	Translation initiation factor eIF-2B subunit alpha OS=Homo sapiens OX=9606 GN=EIF2B1 PE=1 SV=1					1	0	0	0	0	0	0	0	0	0	0	41.2689	47.9329	42.3237	45.4459	57.3236	48.6553	0	0	0	0	0	0	0	0	0	0	0	0	0	0	0	0	0	0	0	0	0	0	0	0	0
1054	P49770	EIF2B2	Translation initiation factor eIF-2B subunit beta OS=Homo sapiens OX=9606 GN=EIF2B2 PE=1 SV=3					2	0	0	0	0	0	0	0	0	0	0	90.9548	102.222	92.8394	100.614	20.1937	91.3664	0	0	0	0	0	0	0	0	0	0	0	0	0	0	0	0	0	0	0	0	0	0	0	0	0
1055	Q9NR50	EIF2B3	Translation initiation factor eIF-2B subunit gamma OS=Homo sapiens OX=9606 GN=EIF2B3 PE=1 SV=1					0	1	1	0	0	0	0	0	0	1	0	0	0	0	0	0	0	68.8334	60.1815	61.5191	73.8871	30.8841	62.5535	20.7121	19.3637	17.7558	21.6357	16.8392	25.6095	0	0	0	0	0	0	0	0	0	0	0	0	0
1056	Q9UI10	EIF2B4	Translation initiation factor eIF-2B subunit delta OS=Homo sapiens OX=9606 GN=EIF2B4 PE=1 SV=2					0	0	0	1	2	0	1	0	2	1	1	0	0	0	0	0	0	0	0	0	0	0	0	0	0	0	0	0	0	45.8064	41.0465	35.3665	41.5714	36.3373	42.8685	56.2223	42.8907	45.4953	54.4184	48.3686	53.6403	0
1057	Q13144	EIF2B5	Translation initiation factor eIF-2B subunit epsilon OS=Homo sapiens OX=9606 GN=EIF2B5 PE=1 SV=3					0	2	3	3	4	1	0	2	0	2	2	0	0	0	0	0	0	102.725	96.0301	91.096	102.142	70.7311	100.01	145.522	128.462	134.005	163.647	133.145	155.306	93.3479	84.6043	80.8245	104.793	91.7037	95.8507	264.586	255.747	261.815	264.345	297.759	281.424	65.702
1058	P41214	EIF2D	Eukaryotic translation initiation factor 2D OS=Homo sapiens OX=9606 GN=EIF2D PE=1 SV=3					0	2	1	2	2	0	3	1	2	3	0	0	0	0	0	0	0	69.8313	69.6665	60.8404	69.9232	190.255	63.2638	96.9176	99.2879	77.8056	117.466	102.151	111.028	157.561	153.175	167.905	181.906	180.982	180.813	217.682	209.919	212.898	216.115	210.454	224.948	0
1059	P05198	EIF2S1	Eukaryotic translation initiation factor 2 subunit 1 OS=Homo sapiens OX=9606 GN=EIF2S1 PE=1 SV=3					3	4	3	4	5	4	4	3	5	3	6	109.541	110.596	111.743	130.276	56.3539	117.475	507.418	511.108	493.215	541.293	399.539	457.582	607.144	570.406	564.779	556.144	514.981	511.345	593.024	560.819	575.77	602.479	592.101	555.397	1328.3	1341.57	1496.62	1305.49	1311.55	1190.76	1204.93
1060	P20042	EIF2S2	Eukaryotic translation initiation factor 2 subunit 2 OS=Homo sapiens OX=9606 GN=EIF2S2 PE=1 SV=2					1	5	4	4	3	4	4	4	5	4	5	18.8598	16.5198	13.4906	17.0876	21.2404	9.85213	284.754	245.868	264.528	300.306	302.16	264.552	564.928	483.245	431.677	446.543	486.575	522.245	336.885	280.186	257.348	333.18	369.537	351.455	536.535	420.043	473.174	449.251	467.197	447.018	722.019
1061	P41091	EIF2S3	Eukaryotic translation initiation factor 2 subunit 3 OS=Homo sapiens OX=9606 GN=EIF2S3 PE=1 SV=3					3	2	4	2	3	3	3	3	4	3	3	113.356	119.286	114.5	131.731	65.1477	106.151	157.953	141.736	141.606	166.564	71.5053	164.345	555.45	487.208	563.232	702.991	491.592	540.369	93.0257	87.652	92.7214	105.605	93.461	97.0144	849.293	870.763	969.188	1011.59	863.209	871.593	512.255
1062	Q14152	EIF3A	Eukaryotic translation initiation factor 3 subunit A OS=Homo sapiens OX=9606 GN=EIF3A PE=1 SV=1					2	5	4	4	2	5	4	5	1	4	3	141.403	189.866	184.657	205.506	290.264	75.5959	604.229	516.427	567.004	604.909	361.292	577.197	489.118	371.144	340.092	479.441	356.303	441.98	270.571	220.461	217.909	320.33	244.677	326.933	137.103	111.877	120.328	125.184	99.5415	119.847	422.992
1063	P55884	EIF3B	Eukaryotic translation initiation factor 3 subunit B OS=Homo sapiens OX=9606 GN=EIF3B PE=1 SV=3					3	5	4	3	2	3	1	2	2	1	3	107.65	114.473	111.104	121.177	61.3986	79.7198	327.442	296.009	321.069	348.134	319.071	346.853	661.84	579.244	521.082	702.582	540.801	664.209	411.927	379.37	364.218	502.386	396.681	493.538	167.07	157.535	171.899	178.285	140.817	170.44	439.989
1064	Q99613	EIF3C	Eukaryotic translation initiation factor 3 subunit C OS=Homo sapiens OX=9606 GN=EIF3C PE=1 SV=1					0	3	4	4	4	4	2	3	4	4	4	0	0	0	0	0	0	307.696	301.847	312.341	315.78	244.384	313.936	655.109	573.173	736.365	814.295	614.847	837.363	251.071	241.156	235.922	301.3	245.466	325.748	232.9	216.448	224.144	242.921	178.631	210.514	318.89
1065	O15371	EIF3D	Eukaryotic translation initiation factor 3 subunit D OS=Homo sapiens OX=9606 GN=EIF3D PE=1 SV=1					4	3	3	2	2	3	4	4	3	5	4	183.598	222.915	218.35	236.31	50.5197	135.844	193.742	166.96	176.15	193.137	95.6769	191.969	144.853	136.114	102.062	130.663	111.361	148.815	110.339	106.703	91.1214	133.554	108.22	130.641	174.127	140.186	169.788	175.591	137.319	153.174	521.554
1066	P60228	EIF3E	Eukaryotic translation initiation factor 3 subunit E OS=Homo sapiens OX=9606 GN=EIF3E PE=1 SV=1					1	6	4	3	4	3	3	3	3	3	3	149.216	150.871	158.269	156.75	31.1281	96.2945	296.53	287.744	276.09	295.129	602.182	306.41	594.557	513.605	432.471	640.474	461.97	607.431	299.696	285.512	282.166	355.94	304.652	358.693	711.541	654.916	727.804	834.42	568.538	716.337	452.1
1067	O00303	EIF3F	Eukaryotic translation initiation factor 3 subunit F OS=Homo sapiens OX=9606 GN=EIF3F PE=1 SV=1			DUB		1	3	4	3	4	4	3	3	4	3	5	42.5088	59.6428	58.5482	69.1418	22.0643	31.6419	240.863	236.027	236.05	259.182	197.107	241.381	210.631	143.541	156.377	199.517	151.765	220.822	45.9826	40.5128	39.6631	63.2533	42.4533	50.3781	539.711	516.384	531.347	536.479	463.782	498.347	183.3
1068	O75821	EIF3G	Eukaryotic translation initiation factor 3 subunit G OS=Homo sapiens OX=9606 GN=EIF3G PE=1 SV=2					2	4	4	4	4	3	4	4	2	2	1	38.3889	45.0862	39.6144	49.5482	73.6235	23.567	268.183	264.023	240.318	270.274	113.506	279.023	441.721	310.627	382.999	400.68	342.246	442.988	296.729	237.785	239.732	317.777	264.333	304.707	510.538	401.372	406.217	380.107	340.948	408.632	346.208
1069	O15372	EIF3H	Eukaryotic translation initiation factor 3 subunit H OS=Homo sapiens OX=9606 GN=EIF3H PE=1 SV=1			DUB		2	5	3	2	3	6	2	2	2	0	1	94.8129	110.164	102.577	122.736	159.124	67.7392	469.938	428.081	448.435	480.934	1393.74	435.139	306.647	249.927	239.946	281.959	232.919	288.162	282.817	224.631	222.833	300.348	230.954	284.893	339.666	286.106	305.528	309.555	245.902	297.254	393.549
1070	Q13347	EIF3I	Eukaryotic translation initiation factor 3 subunit I OS=Homo sapiens OX=9606 GN=EIF3I PE=1 SV=1					2	5	4	3	2	3	3	3	1	1	2	53.398	67.5713	66.551	76.6101	41.2616	39.363	796.172	839.861	824.278	916.758	997.976	959.135	363.548	303.269	336.068	420.718	299.713	411.428	375.36	315.594	352.877	437.091	340.237	410.585	418.825	356.269	390.385	397.402	317.037	367.539	600.453
1071	O75822	EIF3J	Eukaryotic translation initiation factor 3 subunit J OS=Homo sapiens OX=9606 GN=EIF3J PE=1 SV=2					3	3	3	3	1	0	0	1	0	0	0	95.2913	94.6015	99.5883	105.147	34.6431	83.4567	330.962	286.648	269.328	353.207	422.963	352.328	324.712	270.389	305.445	399.059	263.335	486.256	207.345	171.187	138.028	216.858	157.629	252.704	25.2157	25.6221	23.0627	23.0246	19.4438	34.5542	0
1072	Q9UBQ5	EIF3K	Eukaryotic translation initiation factor 3 subunit K OS=Homo sapiens OX=9606 GN=EIF3K PE=1 SV=1					0	4	4	1	3	0	1	2	1	1	1	0	0	0	0	0	0	201.325	214.827	214.506	212.872	124.275	225.592	309.325	248.768	260.938	321.078	236.847	306.613	44.5319	58.9032	55.6273	65.1147	51.4304	64.0798	141.263	135.019	147.104	165.696	126.72	154.248	0
1073	Q9Y262	EIF3L	Eukaryotic translation initiation factor 3 subunit L OS=Homo sapiens OX=9606 GN=EIF3L PE=1 SV=1					1	4	2	2	3	4	2	4	1	2	2	145.969	215.496	185.766	235.969	335.009	82.0162	700.668	649.421	662.084	719.504	549.599	691.042	294.056	175.596	215.977	227.807	184.653	252.361	210.544	174.568	185.269	256.244	188.258	231.559	337.554	273.632	332.04	339.467	240.103	317.166	294.235
1074	Q7L2H7	EIF3M	Eukaryotic translation initiation factor 3 subunit M OS=Homo sapiens OX=9606 GN=EIF3M PE=1 SV=1					1	5	3	4	4	3	1	4	3	2	2	26.2075	30.1565	24.4464	31.5388	43.2462	18.4705	295.482	279.382	271.889	298.129	348.406	310.098	190.611	179.145	115.919	222.499	159.685	205.919	493.799	515.901	526.476	670.733	556.68	585.111	497.744	498.408	505.909	537.012	445.242	491.16	390.938
1075	P60842	EIF4A1	Eukaryotic initiation factor 4A-I OS=Homo sapiens OX=9606 GN=EIF4A1 PE=1 SV=1					5	4	3	3	4	4	4	3	4	5	3	424.767	426.268	384.19	450.687	136.507	420.342	522.013	489.304	427.004	531.436	60.433	513.523	189.516	172.775	170.088	249.649	187.391	186.752	156.031	173.404	156.958	182.3	191.011	186.508	391.97	444.777	430.607	490.387	447.888	443.54	342.691
1076	Q14240	EIF4A2	Eukaryotic initiation factor 4A-II OS=Homo sapiens OX=9606 GN=EIF4A2 PE=1 SV=2					4	3	4	5	5	4	3	4	4	3	4	295.681	327.851	331.008	345.674	52.4659	360.496	242.318	221.414	203.55	255.718	33.0113	230.719	878.702	720.515	714.781	869.543	719.789	762.67	1086.18	966.259	1019.46	1219.89	1131.15	1060.72	917.678	943.672	1001.07	1098.93	987.183	919.88	702.693
1077	P38919	EIF4A3	Eukaryotic initiation factor 4A-III OS=Homo sapiens OX=9606 GN=EIF4A3 PE=1 SV=4					3	4	5	5	2	3	5	3	3	4	2	188.844	179.638	175.769	175.44	36.0667	191.649	150.727	148.96	143.103	167.574	124.387	161.22	254.302	228.663	205.166	264.249	218.906	229.323	201.392	194.999	218.411	270.708	234.419	244.443	117.158	119.617	126.635	185.52	156.404	131.462	196.353
1078	P23588	EIF4B	Eukaryotic translation initiation factor 4B OS=Homo sapiens OX=9606 GN=EIF4B PE=1 SV=2					4	2	4	3	1	1	1	0	0	0	0	219.783	203.513	198.087	239.485	71.8653	206.186	307.912	294.646	275.302	284.273	428.725	313.406	338.796	353.412	346.786	332.887	322.304	334.022	102.438	107.996	97.3831	92.1979	83.0565	92.2913	157.557	161.565	127.396	119.274	125.824	111.005	102.21
1079	P06730	EIF4E	Eukaryotic translation initiation factor 4E OS=Homo sapiens OX=9606 GN=EIF4E PE=1 SV=2					3	4	4	3	3	3	1	4	3	2	2	68.6753	77.571	75.1834	76.4431	842.237	35.7489	382.51	355.3	396.148	393.761	483.017	398.913	582.738	545.425	549.126	563.654	578.099	592.074	221.327	202.89	204.047	248.559	258.941	232.82	305.451	284.435	317.754	311.734	333.828	320.445	460.012
1080	O60573	EIF4E2	Eukaryotic translation initiation factor 4E type 2 OS=Homo sapiens OX=9606 GN=EIF4E2 PE=1 SV=1					1	0	2	0	1	1	3	1	0	1	0	31.7504	27.6516	26.9002	30.8071	39.9477	25.5174	0	0	0	0	0	0	60.2797	49.8593	49.3756	66.1798	56.7092	63.4135	0	0	0	0	0	0	83.7733	66.8172	72.9674	79.851	80.0262	88.745	25.4745
1081	Q9NRA8	EIF4ENIF1	Eukaryotic translation initiation factor 4E transporter OS=Homo sapiens OX=9606 GN=EIF4ENIF1 PE=1 SV=2					2	0	0	0	0	0	0	0	0	0	0	136.162	144.011	124.098	141.638	167.542	123.302	0	0	0	0	0	0	0	0	0	0	0	0	0	0	0	0	0	0	0	0	0	0	0	0	0
1082	Q04637	EIF4G1	Eukaryotic translation initiation factor 4 gamma 1 OS=Homo sapiens OX=9606 GN=EIF4G1 PE=1 SV=4					2	5	2	4	2	3	1	2	3	3	3	122.631	116.386	115.603	126.932	176.878	97.0358	416.898	392.93	412.564	402.686	429.466	399.82	232.204	198.989	211.729	221.571	215.594	231.412	256.719	219.118	217.795	260.582	247.935	274.726	195.033	182.576	198.981	216.292	180.899	216.906	349.805
1083	P78344	EIF4G2	Eukaryotic translation initiation factor 4 gamma 2 OS=Homo sapiens OX=9606 GN=EIF4G2 PE=1 SV=1					3	3	4	5	5	4	5	6	4	4	5	223.035	216.905	236.792	292.138	434.596	206.176	215.461	197.246	209.258	205.8	240.417	199.674	257.377	231.964	239.88	263.081	256.008	275.108	306.518	278.54	289.497	326.598	336.77	326.996	274.953	261.971	299.59	311.07	316.038	316.258	265.912
1084	Q15056	EIF4H	Eukaryotic translation initiation factor 4H OS=Homo sapiens OX=9606 GN=EIF4H PE=1 SV=5					2	3	2	3	4	4	3	3	3	1	3	203.891	203.929	204.449	213.775	302.08	216.483	170.58	166.856	169.588	165.212	124.392	181.494	67.8386	63.5595	61.9397	69.8983	70.0877	70.0562	101.205	97.7788	84.2266	108.059	110.777	100.511	280.811	273.179	288.269	267.441	301.501	259.055	383.445
1085	P55010	EIF5	Eukaryotic translation initiation factor 5 OS=Homo sapiens OX=9606 GN=EIF5 PE=1 SV=2					3	3	3	2	1	0	1	1	1	0	1	171.556	168.584	162.672	175.798	191.398	165.001	466.705	434.862	453.779	453.108	562.616	468.917	243.778	232.761	213.755	266.989	245.525	251.796	405.035	398.533	419.651	501.077	521.277	488.14	204.165	213.772	237.651	252.245	240.157	253.395	0
1086	P63241	EIF5A	Eukaryotic translation initiation factor 5A-1 OS=Homo sapiens OX=9606 GN=EIF5A PE=1 SV=2					4	5	5	4	4	4	3	4	5	5	4	744.824	750.16	656.892	762.927	784.739	722.829	790.697	792.156	784.788	786.605	621.019	828.921	731.032	721.906	746.703	718.982	825.905	719.19	440.852	431.703	394.649	452.934	496.765	484.229	487.151	510.754	529.338	482.695	584.279	545.958	830.633
1087	O60841	EIF5B	Eukaryotic translation initiation factor 5B OS=Homo sapiens OX=9606 GN=EIF5B PE=1 SV=4					3	4	3	3	4	0	0	0	0	0	0	563.35	541.441	509.131	534.145	641.886	479.336	264.163	263.41	253.901	279.195	439.47	271.153	239.083	226.876	209.724	309.457	290.617	270.033	88.8304	81.4363	94.6442	129.601	120.54	110.333	328.837	310.98	347.511	544.172	490.98	496.387	0
1088	P56537	EIF6	Eukaryotic translation initiation factor 6 OS=Homo sapiens OX=9606 GN=EIF6 PE=1 SV=1					3	1	2	4	2	2	3	3	3	3	3	54.617	60.4435	54.9197	56.0788	95.1523	51.8679	28.7075	32.228	30.6525	33.1988	9.24617	32.3488	91.7084	73.9444	75.5428	107.499	74.68	69.1407	258.062	311.918	232.993	408.893	371.239	387.841	196.245	219.298	250.491	330.239	325.313	330.183	186.205
1089	Q53HC9	EIPR1	EARP and GARP complex-interacting protein 1 OS=Homo sapiens OX=9606 GN=EIPR1 PE=1 SV=2					1	0	0	0	0	0	0	0	0	0	0	27.3027	26.3	22.442	23.3738	38.4234	22.8931	0	0	0	0	0	0	0	0	0	0	0	0	0	0	0	0	0	0	0	0	0	0	0	0	0
1090	Q9BQ52	ELAC2	Zinc phosphodiesterase ELAC protein 2 OS=Homo sapiens OX=9606 GN=ELAC2 PE=1 SV=2					2	2	0	1	3	3	2	2	1	2	4	33.4266	30.202	29.1484	36.5421	20.9979	32.8981	73.1543	81.2728	71.9236	79.9905	14.1159	83.0779	0	0	0	0	0	0	37.0532	44.7889	40.6275	41.2876	45.7261	40.115	253.456	272.009	303.805	256.193	255.907	238.973	365.567
1091	Q15717	ELAVL1	ELAV-like protein 1 OS=Homo sapiens OX=9606 GN=ELAVL1 PE=1 SV=2					4	5	5	3	3	4	3	5	2	4	4	134.916	122.142	131.34	162.101	172.25	127.113	484.246	484.388	478.368	526.77	633.488	511.959	268.048	280.997	250.445	291.554	290.939	321.784	211.639	217.694	225.763	236.378	265.24	264.786	285.422	287.883	327.691	308.169	331.067	324.041	347.447
1092	Q96JJ3	ELMO2	Engulfment and cell motility protein 2 OS=Homo sapiens OX=9606 GN=ELMO2 PE=1 SV=2					0	3	3	1	0	0	2	2	0	0	0	0	0	0	0	0	0	166.269	147.572	141.993	169.167	236.652	151.195	416.286	365.216	353.738	428.483	360.846	460.752	109.69	104.489	102.794	133.925	119.209	186.426	0	0	0	0	0	0	0
1093	Q96BJ8	ELMO3	Engulfment and cell motility protein 3 OS=Homo sapiens OX=9606 GN=ELMO3 PE=1 SV=3					0	1	1	0	1	0	0	1	0	3	0	0	0	0	0	0	0	34.6811	34.1332	35.8416	40.7954	13.928	34.5985	61.0389	66.904	52.398	65.7257	62.6291	61.5666	0	0	0	0	0	0	37.8237	40.0922	45.2839	46.3343	49.9562	49.8846	0
1094	Q8IZ81	ELMOD2	ELMO domain-containing protein 2 OS=Homo sapiens OX=9606 GN=ELMOD2 PE=1 SV=1					2	0	0	0	0	0	0	0	0	0	0	577.166	588.923	585.583	601.509	840.377	561.411	0	0	0	0	0	0	0	0	0	0	0	0	0	0	0	0	0	0	0	0	0	0	0	0	0
1095	Q14241	ELOA	Elongin-A OS=Homo sapiens OX=9606 GN=ELOA PE=1 SV=2					0	0	0	0	0	1	0	2	2	0	0	0	0	0	0	0	0	0	0	0	0	0	0	0	0	0	0	0	0	0	0	0	0	0	0	0	0	0	0	0	0	29.4411
1096	Q15370	ELOB	Elongin-B OS=Homo sapiens OX=9606 GN=ELOB PE=1 SV=1					4	3	2	3	1	3	0	1	0	1	2	224.867	224.666	218.165	232.668	391.332	203.902	189.339	166.7	173.062	168.922	314.279	174.149	160.169	154.961	137.019	128.618	149.987	151.463	162.035	156.062	143.72	159.442	170.531	165.313	48.4579	52.4122	51.1554	50.8363	50.2744	47.8011	181.125
1097	Q15369	ELOC	Elongin-C OS=Homo sapiens OX=9606 GN=ELOC PE=1 SV=1					0	0	1	1	2	2	0	1	1	0	0	0	0	0	0	0	0	0	0	0	0	0	0	55.8115	61.467	52.589	61.9545	57.7374	60.0351	36.8951	39.0032	39.6332	43.6018	44.9357	42.3655	74.4216	85.3263	80.0051	84.7519	85.9735	77.3075	82.2557
1098	O95163	ELP1	Elongator complex protein 1 OS=Homo sapiens OX=9606 GN=ELP1 PE=1 SV=3					3	4	2	3	4	3	3	3	3	2	1	156.496	157.356	148.21	182.879	240.678	127.655	349.483	309.004	329.414	375.527	395.375	346.33	120.275	104.678	110.881	133.564	112.422	106.027	83.9906	84.9839	90.0818	112.667	105.746	104.178	273.785	260.344	294.014	281.943	287.72	263.821	397.997
1099	Q6IA86	ELP2	Elongator complex protein 2 OS=Homo sapiens OX=9606 GN=ELP2 PE=1 SV=2					1	3	0	0	0	0	0	0	0	0	0	19.1288	21.778	20.5516	23.6433	34.3013	15.7431	121.778	119.233	121.297	133.754	198.482	148.488	0	0	0	0	0	0	0	0	0	0	0	0	0	0	0	0	0	0	0
1100	Q9H9T3	ELP3	Elongator complex protein 3 OS=Homo sapiens OX=9606 GN=ELP3 PE=1 SV=2					0	4	1	2	2	1	0	0	2	2	3	0	0	0	0	0	0	443.599	408.353	403.104	454.767	87.6083	482.148	23.1644	21.7022	24.4199	30.7782	27.4229	26.8794	53.3517	50.1751	53.3215	63.8649	61.9012	54.4528	71.6221	77.1225	85.1226	95.3093	84.1156	86.2722	84.5999
1101	Q8N766	EMC1	ER membrane protein complex subunit 1 OS=Homo sapiens OX=9606 GN=EMC1 PE=1 SV=1					2	0	1	4	1	0	2	0	1	0	0	84.7114	91.2887	90.3822	92.7667	118.273	64.8954	0	0	0	0	0	0	14.3377	14.3903	10.8568	15.7936	11.2172	18.5858	341.616	327.234	357.804	435.325	368.832	465.899	31.6519	32.2877	35.053	43.311	35.3268	53.6959	0
1102	Q15006	EMC2	ER membrane protein complex subunit 2 OS=Homo sapiens OX=9606 GN=EMC2 PE=1 SV=1					1	0	1	0	0	0	0	0	0	0	0	112.927	126.538	106.505	112.793	58.4564	101.877	0	0	0	0	0	0	21.9272	22.7725	22.9342	25.0273	24.8093	34.5849	0	0	0	0	0	0	0	0	0	0	0	0	0
1103	Q5J8M3	EMC4	ER membrane protein complex subunit 4 OS=Homo sapiens OX=9606 GN=EMC4 PE=1 SV=2					0	0	1	0	0	0	0	0	0	0	0	0	0	0	0	0	0	0	0	0	0	0	0	31.5719	26.6897	21.2398	36.3753	26.067	35.7736	0	0	0	0	0	0	0	0	0	0	0	0	0
1104	Q9NPA0	EMC7	ER membrane protein complex subunit 7 OS=Homo sapiens OX=9606 GN=EMC7 PE=1 SV=1					1	0	0	0	0	0	0	0	0	0	0	105.894	113.367	117.888	116.122	45.648	93.7253	0	0	0	0	0	0	0	0	0	0	0	0	0	0	0	0	0	0	0	0	0	0	0	0	0
1105	O43402	EMC8	ER membrane protein complex subunit 8 OS=Homo sapiens OX=9606 GN=EMC8 PE=1 SV=1					0	1	3	1	1	0	1	0	0	1	1	0	0	0	0	0	0	17.4062	17.6461	16.1201	19.1813	21.8578	13.3886	151.277	137.237	134.891	169.874	147.568	155.081	106.259	81.0517	93.6637	111.302	115.748	138.015	31.7024	31.455	33.5278	30.8122	30.5565	37.6188	0
1106	P50402	EMD	Emerin OS=Homo sapiens OX=9606 GN=EMD PE=1 SV=1					0	4	1	4	4	3	4	3	3	4	4	0	0	0	0	0	0	423.547	398.194	422.973	510.906	381.368	418.924	80.1625	62.1266	73.7943	90.5693	78.0371	80.314	463.664	435.91	469.814	604.666	579.473	532.951	504.921	463.252	563.17	619.689	612.667	567.315	374.545
1107	Q92979	EMG1	Ribosomal RNA small subunit methyltransferase NEP1 OS=Homo sapiens OX=9606 GN=EMG1 PE=1 SV=4					2	1	0	0	0	0	0	0	0	0	0	30.2561	32.404	32.0101	34.2072	0	31.556	38.3796	30.8582	27.9685	39.3776	8.87991	47.4506	0	0	0	0	0	0	0	0	0	0	0	0	0	0	0	0	0	0	0
1108	Q32P44	EML3	Echinoderm microtubule-associated protein-like 3 OS=Homo sapiens OX=9606 GN=EML3 PE=1 SV=1					0	1	2	2	1	0	2	0	1	0	0	0	0	0	0	0	0	36.2895	34.2409	37.25	41.8723	12.3948	36.5149	86.6299	78.106	81.3716	97.654	81.6482	84.7665	69.8768	64.2843	68.3153	88.2541	84.9998	75.2194	34.0943	30.3134	31.6409	30.1094	25.0746	28.3645	0
1109	Q9HC35	EML4	Echinoderm microtubule-associated protein-like 4 OS=Homo sapiens OX=9606 GN=EML4 PE=1 SV=3					0	3	0	1	2	2	3	1	1	3	0	0	0	0	0	0	0	163.572	153.918	149.747	145.467	132.04	155.811	0	0	0	0	0	0	41.3059	40.7886	43.0433	50.7464	52.3058	43.2259	53.1942	48.352	51.7212	50.0219	52.4485	42.2224	87.3758
1110	P54852	EMP3	Epithelial membrane protein 3 OS=Homo sapiens OX=9606 GN=EMP3 PE=1 SV=1					2	0	0	0	0	0	0	0	0	0	0	129.184	107.374	115.407	108.753	124.967	93.5443	0	0	0	0	0	0	0	0	0	0	0	0	0	0	0	0	0	0	0	0	0	0	0	0	0
1111	Q8N8S7	ENAH	Protein enabled homolog OS=Homo sapiens OX=9606 GN=ENAH PE=1 SV=2					1	0	0	0	0	0	0	0	0	0	0	11.8705	13.7621	12.9599	9.58916	221.249	6.72499	0	0	0	0	0	0	0	0	0	0	0	0	0	0	0	0	0	0	0	0	0	0	0	0	0
1112	O94919	ENDOD1	Endonuclease domain-containing 1 protein OS=Homo sapiens OX=9606 GN=ENDOD1 PE=1 SV=2					0	1	4	2	2	3	4	2	3	2	4	0	0	0	0	0	0	119.688	107.306	117.64	117.961	142.996	104.683	133.903	114.679	125.794	159.496	127.905	194.221	108.058	91.2766	94.032	179.069	113.21	211.005	114.982	103.65	111.784	163.992	125.328	189.246	108.975
1113	Q8NFI3	ENGASE	Cytosolic endo-beta-N-acetylglucosaminidase OS=Homo sapiens OX=9606 GN=ENGASE PE=1 SV=1					0	0	0	0	0	0	0	0	0	1	0	0	0	0	0	0	0	0	0	0	0	0	0	0	0	0	0	0	0	0	0	0	0	0	0	0	0	0	0	0	0	0
1114	P06733	ENO1	Alpha-enolase OS=Homo sapiens OX=9606 GN=ENO1 PE=1 SV=2					6	8	6	5	2	1	3	3	3	2	3	597.851	886.204	889.969	838.204	54.8153	863.92	535.628	547.741	517.738	547.066	195.51	710.624	792.686	744.049	679.189	875.712	962.383	881.746	435.43	411.962	439.148	505.806	532.458	550.535	497.99	586.563	596.126	609.055	623.998	551.865	94.0242
1115	P09104	ENO2	Gamma-enolase OS=Homo sapiens OX=9606 GN=ENO2 PE=1 SV=3					3	0	0	0	0	0	0	0	0	0	0	123.499	191.268	189.621	157.126	68.8746	182.638	0	0	0	0	0	0	0	0	0	0	0	0	0	0	0	0	0	0	0	0	0	0	0	0	0
1116	Q9UHY7	ENOPH1	Enolase-phosphatase E1 OS=Homo sapiens OX=9606 GN=ENOPH1 PE=1 SV=1					3	1	1	0	0	0	0	0	0	0	0	182.199	171.217	172.027	195.871	68.6972	189.127	48.6881	47.7622	49.3056	43.9916	62.9675	46.7497	51.7245	55.5492	49.0704	55.4485	52.312	50.1617	0	0	0	0	0	0	0	0	0	0	0	0	0
1117	O43768	ENSA	Alpha-endosulfine OS=Homo sapiens OX=9606 GN=ENSA PE=1 SV=1					2	0	0	0	0	0	0	0	0	0	0	61.0142	62.9494	61.4566	63.4307	44.5272	56.771	0	0	0	0	0	0	0	0	0	0	0	0	0	0	0	0	0	0	0	0	0	0	0	0	0
1118	Q96L91	EP400	E1A-binding protein p400 OS=Homo sapiens OX=9606 GN=EP400 PE=1 SV=4					0	2	2	2	2	2	2	0	1	0	0	0	0	0	0	0	0	178.002	176.215	181.806	214.607	234.692	154.6	346.286	348.521	309.417	367.024	343.875	340.523	485.566	423.187	471.16	561.026	548.18	465.012	200.083	222.88	231.117	246.319	224.94	219.311	496.597
1119	P11171	EPB41	Protein 4.1 OS=Homo sapiens OX=9606 GN=EPB41 PE=1 SV=4					0	2	0	0	0	0	0	0	0	0	0	0	0	0	0	0	0	74.5326	61.8678	57.2456	59.0838	60.9555	68.6211	0	0	0	0	0	0	0	0	0	0	0	0	0	0	0	0	0	0	0
1120	O43491	EPB41L2	Band 4.1-like protein 2 OS=Homo sapiens OX=9606 GN=EPB41L2 PE=1 SV=1					2	3	4	1	1	0	0	0	0	0	0	128.779	119.41	118.247	142.033	175.952	131.78	62.5143	71.8432	75.9817	56.308	75.2566	53.8704	359.979	375.81	384.146	336.943	448.173	316.78	27.6763	30.3923	31.6541	26.2552	36.3973	31.6643	204.835	223.164	266.195	177.795	248.144	188.844	0
1121	Q9H329	EPB41L4B	Band 4.1-like protein 4B OS=Homo sapiens OX=9606 GN=EPB41L4B PE=2 SV=2					0	0	1	0	0	0	0	0	1	0	1	0	0	0	0	0	0	0	0	0	0	0	0	65.9493	59.5773	53.3911	67.5416	56.4498	57.9991	0	0	0	0	0	0	0	0	0	0	0	0	0
1122	P16422	EPCAM	Epithelial cell adhesion molecule OS=Homo sapiens OX=9606 GN=EPCAM PE=1 SV=2					2	2	3	3	3	1	0	1	2	0	1	104.382	111.326	100.98	115.505	155.314	92.177	44.8115	40.1611	35.1238	34.5072	44.9388	40.5712	303.505	306.017	259.883	314.234	312.633	411.996	266.009	230.9	227.327	323.917	305.04	459.08	190.763	201.123	197.543	277.37	242.873	461.691	30.1029
1123	P29317	EPHA2	Ephrin type-A receptor 2 OS=Homo sapiens OX=9606 GN=EPHA2 PE=1 SV=2				Kinase	1	3	3	2	2	3	2	1	2	3	3	22.0021	28.7077	29.3468	26.441	30.4684	23.0018	142.347	145.702	148.439	135.04	111.773	147.491	132.078	116.084	132.895	134.572	112.714	155.02	119.735	108.479	117.376	151.108	128.452	161.876	221.729	210.21	238.225	298.372	225.326	328.305	277.729
1124	P07099	EPHX1	Epoxide hydrolase 1 OS=Homo sapiens OX=9606 GN=EPHX1 PE=1 SV=1					2	1	0	0	0	0	0	0	0	0	0	152.375	150.699	131.154	157.269	20.5035	137.655	50.0212	49.0034	46.0679	53.0177	152.511	57.6272	0	0	0	0	0	0	0	0	0	0	0	0	0	0	0	0	0	0	0
1125	P34913	EPHX2	Bifunctional epoxide hydrolase 2 OS=Homo sapiens OX=9606 GN=EPHX2 PE=1 SV=2					2	0	0	0	0	0	0	0	0	0	0	48.6119	44.8395	47.1035	54.0586	55.804	50.2836	0	0	0	0	0	0	0	0	0	0	0	0	0	0	0	0	0	0	0	0	0	0	0	0	0
1126	Q9Y6I3	EPN1	Epsin-1 OS=Homo sapiens OX=9606 GN=EPN1 PE=1 SV=2					3	0	1	0	0	0	0	0	0	0	0	143.293	164.062	152.283	140.791	153.841	141.81	0	0	0	0	0	0	34.5766	28.3327	32.2658	29.9603	32.5757	32.7855	0	0	0	0	0	0	0	0	0	0	0	0	0
1127	P58107	EPPK1	Epiplakin OS=Homo sapiens OX=9606 GN=EPPK1 PE=1 SV=3					0	0	2	4	2	2	3	1	3	2	3	0	0	0	0	0	0	0	0	0	0	0	0	83.8622	59.1765	69.7797	83.6429	64.8634	73.4597	205.774	176.163	207.77	193.194	160.936	156.678	409.541	345.791	418.086	363.733	275.876	256.636	372.383
1128	P07814	EPRS	Bifunctional glutamate/proline--tRNA ligase OS=Homo sapiens OX=9606 GN=EPRS PE=1 SV=5					3	5	6	5	9	4	6	7	4	4	6	60.0817	60.6383	61.5938	74.7488	44.8204	47.118	280.62	272.731	275.638	286.167	544.408	272.92	479.741	406.036	426.078	458.253	445.83	508.901	340.367	321.562	341.185	429.772	415.7	494.955	1154.42	1171.03	1294.6	1419.94	1345.02	1613.93	425.03
1129	P42566	EPS15	Epidermal growth factor receptor substrate 15 OS=Homo sapiens OX=9606 GN=EPS15 PE=1 SV=2					1	0	0	0	0	0	0	0	0	0	0	25.5983	24.2087	22.8166	23.6847	34.3636	26.7657	0	0	0	0	0	0	0	0	0	0	0	0	0	0	0	0	0	0	0	0	0	0	0	0	0
1130	Q9UBC2	EPS15L1	Epidermal growth factor receptor substrate 15-like 1 OS=Homo sapiens OX=9606 GN=EPS15L1 PE=1 SV=1					4	0	1	0	0	0	0	0	0	0	0	219.079	227.503	230.258	244.9	304.761	215.386	0	0	0	0	0	0	29.5643	25.7558	27.9267	29.9016	31.6589	30.7838	0	0	0	0	0	0	0	0	0	0	0	0	0
1131	Q12929	EPS8	Epidermal growth factor receptor kinase substrate 8 OS=Homo sapiens OX=9606 GN=EPS8 PE=1 SV=1					2	0	0	0	0	0	0	0	0	0	0	32.3914	28.0432	30.4289	31.235	54.2536	29.7665	0	0	0	0	0	0	0	0	0	0	0	0	0	0	0	0	0	0	0	0	0	0	0	0	0
1132	Q9H6S3	EPS8L2	Epidermal growth factor receptor kinase substrate 8-like protein 2 OS=Homo sapiens OX=9606 GN=EPS8L2 PE=1 SV=2					3	0	0	0	0	0	0	0	0	0	0	189.688	177.747	185.911	208.857	122.391	188.504	0	0	0	0	0	0	0	0	0	0	0	0	0	0	0	0	0	0	0	0	0	0	0	0	0
1133	O75616	ERAL1	GTPase Era, mitochondrial OS=Homo sapiens OX=9606 GN=ERAL1 PE=1 SV=2					0	2	4	1	1	2	2	2	1	1	0	0	0	0	0	0	0	92.0907	89.113	98.525	108.132	118.104	80.1422	737.377	695.357	644.657	785.91	709.606	727.953	96.188	83.9411	102.521	104.822	114.451	97.6917	126.203	116.125	128.065	115.309	129.64	107.368	121.606
1134	Q9NZ08	ERAP1	Endoplasmic reticulum aminopeptidase 1 OS=Homo sapiens OX=9606 GN=ERAP1 PE=1 SV=3					1	0	0	0	0	0	0	0	0	0	0	13.5546	11.4088	11.0092	14.0992	17.6163	13.1516	0	0	0	0	0	0	0	0	0	0	0	0	0	0	0	0	0	0	0	0	0	0	0	0	0
1135	P04626	ERBB2	Receptor tyrosine-protein kinase erbB-2 OS=Homo sapiens OX=9606 GN=ERBB2 PE=1 SV=1				Kinase	2	0	0	0	0	0	0	0	0	0	0	138.043	140.992	118.558	162.931	124.035	141.149	0	0	0	0	0	0	0	0	0	0	0	0	0	0	0	0	0	0	0	0	0	0	0	0	0
1136	Q96RT1	ERBIN	Erbin OS=Homo sapiens OX=9606 GN=ERBIN PE=1 SV=2					2	2	4	4	2	3	0	1	2	3	0	122.871	119.09	123.639	150.981	27.8489	114.179	37.9854	31.9247	36.5656	34.7823	21.7289	35.9299	195.256	174.79	181.845	225.728	160.659	176.267	147.595	167.612	159.824	189.141	173.188	181.126	83.3407	88.053	91.988	82.9873	89.9608	93.6373	181.93
1137	P18074	ERCC2	General transcription and DNA repair factor IIH helicase subunit XPD OS=Homo sapiens OX=9606 GN=ERCC2 PE=1 SV=1					0	0	0	0	1	0	2	2	1	1	0	0	0	0	0	0	0	0	0	0	0	0	0	0	0	0	0	0	0	0	0	0	0	0	0	41.2627	46.5091	43.0586	41.8704	45.0767	46.1609	0
1138	P19447	ERCC3	General transcription and DNA repair factor IIH helicase subunit XPB OS=Homo sapiens OX=9606 GN=ERCC3 PE=1 SV=1					0	0	3	1	1	3	1	2	2	4	2	0	0	0	0	0	0	0	0	0	0	0	0	486.644	470.538	445.452	570.314	500.963	471.663	282.574	320.927	300.719	414.111	356.55	339.113	253.619	253.09	287.148	350.307	291.418	294.294	440.111
1139	Q2NKX8	ERCC6L	DNA excision repair protein ERCC-6-like OS=Homo sapiens OX=9606 GN=ERCC6L PE=1 SV=1					0	4	1	0	0	0	1	0	0	0	0	0	0	0	0	0	0	212.401	196.319	193.322	199.971	246.09	206.157	86.6634	93.3711	81.2044	78.902	80.007	81.1019	0	0	0	0	0	0	0	0	0	0	0	0	0
1140	O14944	EREG	Proepiregulin OS=Homo sapiens OX=9606 GN=EREG PE=1 SV=1					1	0	0	0	0	0	0	0	0	0	0	26.8088	24.905	29.0635	26.7545	6.92203	24.9776	0	0	0	0	0	0	0	0	0	0	0	0	0	0	0	0	0	0	0	0	0	0	0	0	0
1141	Q969X5	ERGIC1	Endoplasmic reticulum-Golgi intermediate compartment protein 1 OS=Homo sapiens OX=9606 GN=ERGIC1 PE=1 SV=1					0	1	1	2	3	2	0	0	1	0	0	0	0	0	0	0	0	34.5065	35.9047	30.2492	31.1859	39.0396	30.3668	14.3274	12.4364	15.6822	18.6288	15.9309	13.6614	45.2757	41.4694	47.0536	65.0017	61.3956	56.7725	63.6045	70.8857	72.3913	84.3025	85.2065	79.8588	60.9956
1142	P84090	ERH	Enhancer of rudimentary homolog OS=Homo sapiens OX=9606 GN=ERH PE=1 SV=1					1	0	0	0	3	2	2	2	0	1	3	34.8831	66.3014	75.3997	67.2269	474.579	41.0445	0	0	0	0	0	0	0	0	0	0	0	0	0	0	0	0	0	0	225.881	220.248	235.774	255.573	273.158	232.62	173.331
1143	Q8IV48	ERI1	3'-5' exoribonuclease 1 OS=Homo sapiens OX=9606 GN=ERI1 PE=1 SV=3					0	3	2	3	4	1	2	2	4	3	2	0	0	0	0	0	0	161.713	140.498	143.63	157.955	124.805	147.475	236.266	210.758	209.303	211.633	225.233	239.333	294.813	251.994	266.284	300.868	276.265	285.48	486.878	447.823	470.158	445.308	453.745	421.527	151.607
1144	O43414	ERI3	ERI1 exoribonuclease 3 OS=Homo sapiens OX=9606 GN=ERI3 PE=1 SV=2					0	2	0	0	0	0	0	0	0	0	0	0	0	0	0	0	0	191.1	166.048	169.038	177.008	142.801	177.532	0	0	0	0	0	0	0	0	0	0	0	0	0	0	0	0	0	0	0
1145	O75477	ERLIN1	Erlin-1 OS=Homo sapiens OX=9606 GN=ERLIN1 PE=1 SV=1					0	0	4	3	3	4	4	4	4	6	6	0	0	0	0	0	0	0	0	0	0	0	0	297.519	277.042	308.095	360.034	294.987	260.451	130.965	133.946	130.839	189.745	155.309	176.687	334.276	296.001	359.563	477.813	380.082	438.532	682.853
1146	O94905	ERLIN2	Erlin-2 OS=Homo sapiens OX=9606 GN=ERLIN2 PE=1 SV=1					0	0	3	3	2	3	2	2	3	4	4	0	0	0	0	0	0	0	0	0	0	0	0	216.022	190.521	213.554	236.047	188.692	157.686	133.416	136.356	144.283	193.058	169.775	149.5	37.9014	41.2621	44.0718	55.5126	44.2182	49.6354	189.738
1147	Q96HE7	ERO1A	ERO1-like protein alpha OS=Homo sapiens OX=9606 GN=ERO1A PE=1 SV=2					2	2	1	0	0	0	0	0	0	0	0	32.4161	35.4615	31.348	31.535	26.9413	32.7921	257.366	267.235	243.941	268.494	385.953	282.397	101.486	92.9328	94.0588	101.5	103.613	94.7552	0	0	0	0	0	0	0	0	0	0	0	0	0
1148	P30040	ERP29	Endoplasmic reticulum resident protein 29 OS=Homo sapiens OX=9606 GN=ERP29 PE=1 SV=4					3	3	2	0	0	0	0	0	0	0	0	218.365	275.446	295.513	303.811	251.521	272.153	119.288	126.106	116.064	146.734	173.273	161.366	59.0278	59.5517	52.6425	61.5087	72.6654	70.3675	0	0	0	0	0	0	0	0	0	0	0	0	0
1149	Q9BS26	ERP44	Endoplasmic reticulum resident protein 44 OS=Homo sapiens OX=9606 GN=ERP44 PE=1 SV=1					1	3	1	0	1	0	1	0	0	0	0	17.8398	19.3995	18.5743	19.7583	5.03353	21.0012	206.004	228.093	195.455	213.153	107.973	238.688	128.862	150.946	161.204	136.554	155.507	122.799	0	0	0	0	0	0	65.6313	74.1086	88.688	72.3271	74.9671	74.5626	0
1150	Q56NI9	ESCO2	N-acetyltransferase ESCO2 OS=Homo sapiens OX=9606 GN=ESCO2 PE=1 SV=1					0	0	0	0	0	0	0	0	1	0	0	0	0	0	0	0	0	0	0	0	0	0	0	0	0	0	0	0	0	0	0	0	0	0	0	0	0	0	0	0	0	0
1151	P10768	ESD	S-formylglutathione hydrolase OS=Homo sapiens OX=9606 GN=ESD PE=1 SV=2					3	4	3	4	3	4	4	3	3	3	4	306.275	307.549	289.609	345.608	159.23	313.335	632.8	587.832	597.764	685.641	624.199	612.14	800.92	707.33	727.913	873.664	780.629	783.976	1047.85	1049.26	1046.72	1337.68	1275.41	1294.01	1103.07	1047.02	1167.4	1268.59	1262.39	1227.47	1713.51
1152	Q9H501	ESF1	ESF1 homolog OS=Homo sapiens OX=9606 GN=ESF1 PE=1 SV=1					0	0	0	1	4	1	1	2	1	3	2	0	0	0	0	0	0	0	0	0	0	0	0	0	0	0	0	0	0	64.3461	59.5915	60.9589	70.1495	61.832	62.7462	155.948	153.186	144.991	149.343	147.592	153.082	21.9312
1153	Q14674	ESPL1	Separin OS=Homo sapiens OX=9606 GN=ESPL1 PE=1 SV=3					0	0	0	0	1	1	0	1	1	0	0	0	0	0	0	0	0	0	0	0	0	0	0	0	0	0	0	0	0	0	0	0	0	0	0	15.985	18.7377	17.1951	16.1813	17.9348	16.8979	79.5537
1154	Q6NXG1	ESRP1	Epithelial splicing regulatory protein 1 OS=Homo sapiens OX=9606 GN=ESRP1 PE=1 SV=2					0	1	3	3	0	0	1	1	0	0	0	0	0	0	0	0	0	106.175	108.7	94.4107	112.03	123.522	104.388	67.2613	61.7432	50.4966	60.7192	61.8122	63.4663	85.4083	79.6506	79.3655	81.9173	82.85	73.8886	0	0	0	0	0	0	0
1155	Q9H6T0	ESRP2	Epithelial splicing regulatory protein 2 OS=Homo sapiens OX=9606 GN=ESRP2 PE=1 SV=1					0	2	0	1	1	0	1	0	0	1	0	0	0	0	0	0	0	180.078	168.144	176.622	202.064	55.2998	182.305	0	0	0	0	0	0	35.7642	40.2737	36.9339	36.5988	39.6707	38.3851	126.567	149.595	152.843	157.706	177.144	153.926	0
1156	P11474	ESRRA	Steroid hormone receptor ERR1 OS=Homo sapiens OX=9606 GN=ESRRA PE=1 SV=3					0	0	1	1	1	1	1	1	0	0	2	0	0	0	0	0	0	0	0	0	0	0	0	24.3692	22.4708	19.2579	29.7172	30.32	27.2292	19.7322	24.4086	20.4782	21.3193	20.4791	21.332	26.2042	32.9681	32.2895	34.2127	36.4311	33.777	43.0773
1157	Q9BSJ8	ESYT1	Extended synaptotagmin-1 OS=Homo sapiens OX=9606 GN=ESYT1 PE=1 SV=1					3	3	2	3	3	3	2	3	2	2	1	82.2238	90.6381	76.9015	85.6409	181.92	67.8326	125.233	121.021	112.896	126.957	47.5743	136.649	171.05	147.16	145.739	196.57	176.07	205.794	299.58	319.391	276.899	356.582	366.306	410.005	239.657	245.288	228.324	312.476	278.284	331.8	294.477
1158	A0FGR8	ESYT2	Extended synaptotagmin-2 OS=Homo sapiens OX=9606 GN=ESYT2 PE=1 SV=1					2	2	2	2	2	3	4	1	3	2	1	107.092	105.26	95.8532	110.398	76.762	94.2176	88.5007	86.0329	77.3635	80.5805	76.1674	81.2359	32.874	26.3346	20.5567	34.8932	34.5652	30.9534	183.582	166.441	174.818	227.549	211.163	211.755	164.064	175.58	173.227	161.776	162.136	161.164	254.227
1159	P62495	ETF1	Eukaryotic peptide chain release factor subunit 1 OS=Homo sapiens OX=9606 GN=ETF1 PE=1 SV=3					5	2	1	3	0	0	0	0	0	0	0	642.85	634.415	593.884	636.498	735.29	583.972	279.902	303.829	301.816	325.756	59.7541	362.606	62.4233	70.1931	58.7011	68.8105	62.8232	69.5284	146.17	138.972	137.44	132.403	121.881	126.896	0	0	0	0	0	0	0
1160	P13804	ETFA	Electron transfer flavoprotein subunit alpha, mitochondrial OS=Homo sapiens OX=9606 GN=ETFA PE=1 SV=1					3	3	2	2	2	0	0	0	0	0	1	129.57	123.945	121.23	123.261	93.0975	121.055	227.182	219.674	228.407	220.144	230.008	216.518	40.3628	40.5494	39.4611	39.5304	44.791	40.6313	126.9	125	131.987	144.424	150.265	132.233	93.9119	93.7453	97.0074	91.1343	105.33	95.7507	0
1161	P38117	ETFB	Electron transfer flavoprotein subunit beta OS=Homo sapiens OX=9606 GN=ETFB PE=1 SV=3					3	2	3	2	1	2	0	0	0	0	0	84.9148	99.7388	94.9967	106.573	113.917	92.2945	165.136	166.667	161.482	165.727	180.004	173.296	160.57	140.56	137.205	156.823	146.641	157.598	113.101	84.931	108.329	89.0199	116.628	90.2034	43.9147	46.306	48.5349	38.4779	45.3989	45.1146	79.3792
1162	O95571	ETHE1	Persulfide dioxygenase ETHE1, mitochondrial OS=Homo sapiens OX=9606 GN=ETHE1 PE=1 SV=2					1	0	1	0	0	0	0	0	0	0	0	32.3762	36.7411	35.0504	34.9798	0	41.1657	0	0	0	0	0	0	84.2169	87.2577	76.0262	80.0328	68.6854	78.6192	0	0	0	0	0	0	0	0	0	0	0	0	0
1163	Q9HBU6	ETNK1	Ethanolamine kinase 1 OS=Homo sapiens OX=9606 GN=ETNK1 PE=1 SV=1					0	2	2	0	2	1	0	2	0	0	0	0	0	0	0	0	0	252.1	231.775	219.881	252.452	182.424	242.645	124.506	111.347	106.776	103.722	107.516	112.044	0	0	0	0	0	0	127.204	124.826	134.253	140.526	134.097	128.23	137.223
1164	Q86UK5	EVC2	Limbin OS=Homo sapiens OX=9606 GN=EVC2 PE=1 SV=1					0	1	0	0	1	1	1	2	0	0	2	0	0	0	0	0	0	93.8472	82.0607	97.2945	129.934	139.01	97.6216	0	0	0	0	0	0	0	0	0	0	0	0	410.409	342.728	371.216	414.018	385.314	399.249	251.209
1165	Q01844	EWSR1	RNA-binding protein EWS OS=Homo sapiens OX=9606 GN=EWSR1 PE=1 SV=1					1	1	0	1	1	0	1	0	0	0	1	130.841	128.584	105.357	148.4	15.0393	135.242	95.3856	105.509	100.894	99.302	140.638	119.608	0	0	0	0	0	0	116.002	110.737	109.893	136.563	138.781	136.742	139.738	121.263	125.441	126.388	143.751	127.662	0
1166	Q9UQ84	EXO1	Exonuclease 1 OS=Homo sapiens OX=9606 GN=EXO1 PE=1 SV=2					0	0	0	0	0	0	1	1	1	0	0	0	0	0	0	0	0	0	0	0	0	0	0	0	0	0	0	0	0	0	0	0	0	0	0	0	0	0	0	0	0	0
1167	Q9NV70	EXOC1	Exocyst complex component 1 OS=Homo sapiens OX=9606 GN=EXOC1 PE=1 SV=4					0	0	0	0	1	0	0	1	0	0	0	0	0	0	0	0	0	0	0	0	0	0	0	0	0	0	0	0	0	0	0	0	0	0	0	131.305	106.798	128.861	140.252	133.04	138.725	0
1168	Q96KP1	EXOC2	Exocyst complex component 2 OS=Homo sapiens OX=9606 GN=EXOC2 PE=1 SV=1					0	0	3	2	1	2	0	3	2	0	0	0	0	0	0	0	0	0	0	0	0	0	0	148.532	143.299	141.49	169.454	151.41	159.858	57.9639	56.2354	58.2127	72.2614	60.5015	68.9018	29.738	34.3549	39.2235	45.1358	37.2074	41.3817	99.2424
1169	O60645	EXOC3	Exocyst complex component 3 OS=Homo sapiens OX=9606 GN=EXOC3 PE=1 SV=2					0	1	2	1	1	3	3	0	0	0	0	0	0	0	0	0	0	42.686	38.5435	34.5272	40.7019	42.7874	39.6977	156.732	127.781	138.987	169.499	139.671	150.059	27.1645	27.8132	28.1056	32.3298	32.4053	34.6548	91.7404	90.1779	100.234	119.185	97.9977	114.341	155.869
1170	Q96A65	EXOC4	Exocyst complex component 4 OS=Homo sapiens OX=9606 GN=EXOC4 PE=1 SV=1					0	2	3	3	1	2	2	2	2	2	2	0	0	0	0	0	0	98.031	95.282	97.6442	103.827	63.5991	83.9449	271.223	251.125	232.741	245.519	245.048	257.045	239.814	246.667	215.044	331.302	301.212	314.374	99.1309	87.0213	95.6021	105.779	101.385	103.648	383.554
1171	O00471	EXOC5	Exocyst complex component 5 OS=Homo sapiens OX=9606 GN=EXOC5 PE=1 SV=1					0	1	1	1	0	0	0	1	0	0	0	0	0	0	0	0	0	26.154	25.6983	28.3748	30.5841	35.2759	28.7394	177.995	166.137	140.528	201.194	175.643	178.031	17.4021	18.8185	17.574	16.5071	19.8194	22.6445	0	0	0	0	0	0	0
1172	Q8TAG9	EXOC6	Exocyst complex component 6 OS=Homo sapiens OX=9606 GN=EXOC6 PE=1 SV=3					1	1	3	1	0	1	0	0	0	0	0	102.599	115.782	112.044	115.899	19.8384	104.067	238.101	210.876	233.511	263.492	46.6768	218.867	361.685	323.451	343.167	393.518	340.647	390.846	114.875	106.468	108.272	128.462	121.907	133.85	0	0	0	0	0	0	152.597
1173	Q9Y2D4	EXOC6B	Exocyst complex component 6B OS=Homo sapiens OX=9606 GN=EXOC6B PE=1 SV=3					0	0	1	1	0	0	0	0	0	0	0	0	0	0	0	0	0	0	0	0	0	0	0	22.1613	21.5415	19.633	20.9635	19.1915	24.9609	70.5987	69.5964	71.695	79.0132	79.0415	97.477	0	0	0	0	0	0	0
1174	Q9UPT5	EXOC7	Exocyst complex component 7 OS=Homo sapiens OX=9606 GN=EXOC7 PE=1 SV=3					2	2	0	0	0	0	0	0	0	0	0	59.811	65.7677	62.9851	80.5572	99.4216	59.1394	142.083	131.549	128.136	144.622	192.682	131.204	0	0	0	0	0	0	0	0	0	0	0	0	0	0	0	0	0	0	0
1175	Q8IYI6	EXOC8	Exocyst complex component 8 OS=Homo sapiens OX=9606 GN=EXOC8 PE=1 SV=2					0	0	1	0	1	0	0	0	0	0	0	0	0	0	0	0	0	0	0	0	0	0	0	48.9081	55.9029	57.9473	61.0564	52.2552	64.3969	0	0	0	0	0	0	44.7865	41.2861	45.9794	50.5631	53.3692	55.1819	0
1176	Q9Y3B2	EXOSC1	Exosome complex component CSL4 OS=Homo sapiens OX=9606 GN=EXOSC1 PE=1 SV=1					0	1	1	1	0	0	0	0	0	0	0	0	0	0	0	0	0	405.152	363.914	362.019	401.211	447.499	342.522	115.091	119.01	105.315	142.846	121.58	113.334	128.991	147.129	152.964	178.594	164.836	151.754	0	0	0	0	0	0	0
1177	Q01780	EXOSC10	Exosome component 10 OS=Homo sapiens OX=9606 GN=EXOSC10 PE=1 SV=2					2	2	3	3	4	3	3	3	3	3	2	64.0356	66.7803	65.6331	66.5789	23.7302	53.4105	67.1599	66.3656	68.7623	72.5429	23.0857	73.4128	176.513	147.431	163.29	192.522	169.545	208.192	162.694	133.259	125.57	165.382	131.136	152.987	330.156	252.926	269.524	295.157	244.828	326.204	250.76
1178	Q13868	EXOSC2	Exosome complex component RRP4 OS=Homo sapiens OX=9606 GN=EXOSC2 PE=1 SV=2					1	0	0	0	0	0	0	0	0	0	0	110.276	136.238	124.524	132.205	146.571	115.981	0	0	0	0	0	0	0	0	0	0	0	0	0	0	0	0	0	0	0	0	0	0	0	0	0
1179	Q9NQT5	EXOSC3	Exosome complex component RRP40 OS=Homo sapiens OX=9606 GN=EXOSC3 PE=1 SV=3					2	3	4	3	3	1	2	1	0	2	1	56.572	60.521	59.2513	66.5445	37.6307	57.0592	319.915	310.178	309.263	315.019	429.945	303.074	586.507	570.563	522.182	608.252	554.622	564.135	326.153	325.524	353.545	382.051	388.714	345.458	397.159	409.204	431.215	424.569	406.228	389.585	160.771
1180	Q9NQT4	EXOSC5	Exosome complex component RRP46 OS=Homo sapiens OX=9606 GN=EXOSC5 PE=1 SV=1					2	0	0	0	0	0	0	0	0	0	0	149.369	151.612	146.606	152.601	214.657	132.006	0	0	0	0	0	0	0	0	0	0	0	0	0	0	0	0	0	0	0	0	0	0	0	0	0
1181	Q5RKV6	EXOSC6	Exosome complex component MTR3 OS=Homo sapiens OX=9606 GN=EXOSC6 PE=1 SV=1					0	2	2	0	1	1	0	0	0	0	1	0	0	0	0	0	0	123.257	117.243	114.563	129.149	129.337	155.28	94.4628	95.5975	89.5499	103.686	98.271	98.8453	0	0	0	0	0	0	102.751	87.5552	93.324	92.9624	93.0482	97.5951	78.5477
1182	Q15024	EXOSC7	Exosome complex component RRP42 OS=Homo sapiens OX=9606 GN=EXOSC7 PE=1 SV=3					0	1	1	1	0	0	0	0	0	0	0	0	0	0	0	0	0	50.9377	57.3572	55.1759	50.1593	58.4371	56.9194	155.505	140.126	134.499	149.173	129.871	152.529	41.0419	40.9242	39.6435	50.2514	45.5202	46.0609	0	0	0	0	0	0	0
1183	Q96B26	EXOSC8	Exosome complex component RRP43 OS=Homo sapiens OX=9606 GN=EXOSC8 PE=1 SV=1					3	0	0	0	0	0	2	0	2	2	0	163.771	163.132	162.01	163.461	133.743	151.839	0	0	0	0	0	0	0	0	0	0	0	0	0	0	0	0	0	0	0	0	0	0	0	0	0
1184	Q06265	EXOSC9	Exosome complex component RRP45 OS=Homo sapiens OX=9606 GN=EXOSC9 PE=1 SV=3					1	0	0	0	0	0	0	0	0	0	0	12.7372	15.1725	13.8913	16.1098	12.7464	13.902	0	0	0	0	0	0	0	0	0	0	0	0	0	0	0	0	0	0	0	0	0	0	0	0	0
1185	Q99504	EYA3	Eyes absent homolog 3 OS=Homo sapiens OX=9606 GN=EYA3 PE=1 SV=3				Phosphatase	2	1	0	0	0	0	0	0	0	0	0	77.6616	76.7837	70.6535	85.4865	99.754	73.7433	70.7861	77.5101	76.1492	69.8469	102.452	74.7048	0	0	0	0	0	0	0	0	0	0	0	0	0	0	0	0	0	0	0
1186	Q15910	EZH2	Histone-lysine N-methyltransferase EZH2 OS=Homo sapiens OX=9606 GN=EZH2 PE=1 SV=2					0	0	1	1	1	1	1	0	1	0	0	0	0	0	0	0	0	0	0	0	0	0	0	205.904	207.727	207.993	245.608	215.103	235.772	323.662	303.395	323.172	323.872	340.381	306.084	312.87	311.502	334.711	311.343	316.915	302.884	245.078
1187	P15311	EZR	Ezrin OS=Homo sapiens OX=9606 GN=EZR PE=1 SV=4					1	3	5	7	7	4	7	6	5	5	6	38.3252	94.895	70.5679	103.365	767.42	41.5981	323.56	323.755	304.621	330.281	51.3726	359.458	510.129	435.01	469.313	528.09	508.199	506.95	520.226	433.76	386.998	467.079	454.625	448.615	1358.46	1357.9	1232.21	1512.9	1377.96	1317.58	550.045
1188	Q9Y624	F11R	Junctional adhesion molecule A OS=Homo sapiens OX=9606 GN=F11R PE=1 SV=1					2	0	0	0	0	0	0	0	0	0	0	267.775	272.848	254.633	267.516	27.9105	241.307	0	0	0	0	0	0	0	0	0	0	0	0	0	0	0	0	0	0	0	0	0	0	0	0	0
1189	Q0VG06	FAAP100	Fanconi anemia core complex-associated protein 100 OS=Homo sapiens OX=9606 GN=FAAP100 PE=1 SV=3					0	1	0	0	0	0	0	0	0	0	0	0	0	0	0	0	0	46.6531	45.4865	45.7677	43.7836	25.6944	50.2356	0	0	0	0	0	0	0	0	0	0	0	0	0	0	0	0	0	0	0
1190	Q01469	FABP5	Fatty acid-binding protein 5 OS=Homo sapiens OX=9606 GN=FABP5 PE=1 SV=3					3	4	3	3	2	2	3	1	0	1	1	177.766	182.467	169.911	212.158	1203.88	193.896	239.245	245.016	252.739	220.492	867.094	229.637	306.843	238.577	221.19	262.868	300.933	269.517	266.438	221.49	254.618	247.923	289.161	250.23	257.103	183.006	217.349	145.456	210.578	175.725	341.838
1191	Q9UNN5	FAF1	FAS-associated factor 1 OS=Homo sapiens OX=9606 GN=FAF1 PE=1 SV=2					3	0	0	0	0	0	0	0	0	0	0	48.6475	45.4459	40.4382	54.1458	49.9237	47.1713	0	0	0	0	0	0	0	0	0	0	0	0	0	0	0	0	0	0	0	0	0	0	0	0	0
1192	Q96CS3	FAF2	FAS-associated factor 2 OS=Homo sapiens OX=9606 GN=FAF2 PE=1 SV=2					0	3	4	3	4	4	3	2	3	2	1	0	0	0	0	0	0	109.102	128.446	115.394	131.005	61.7646	124.63	201.895	180.266	203.16	223.147	205.835	226.807	183.471	183.733	207.767	224.616	235.536	218.551	364.901	362.434	390.093	377.34	393.956	403.912	372.625
1193	Q6P587	FAHD1	Acylpyruvase FAHD1, mitochondrial OS=Homo sapiens OX=9606 GN=FAHD1 PE=1 SV=2					1	0	0	0	0	0	0	0	0	1	0	38.9652	41.8377	44.5527	39.1943	61.8297	46.9625	0	0	0	0	0	0	0	0	0	0	0	0	0	0	0	0	0	0	0	0	0	0	0	0	0
1194	Q96PZ2	FAM111A	Protein FAM111A OS=Homo sapiens OX=9606 GN=FAM111A PE=1 SV=2					0	0	0	1	0	0	0	2	0	1	0	0	0	0	0	0	0	0	0	0	0	0	0	0	0	0	0	0	0	139.326	122.879	114.326	74.8624	71.6896	69.5231	0	0	0	0	0	0	0
1195	Q6SJ93	FAM111B	Protein FAM111B OS=Homo sapiens OX=9606 GN=FAM111B PE=1 SV=1					0	0	0	0	1	0	1	0	0	0	0	0	0	0	0	0	0	0	0	0	0	0	0	0	0	0	0	0	0	0	0	0	0	0	0	62.9409	61.9793	65.4816	62.3483	59.8288	62.7264	0
1196	Q8IWE2	FAM114A1	Protein NOXP20 OS=Homo sapiens OX=9606 GN=FAM114A1 PE=1 SV=2					2	0	0	0	0	0	0	0	0	0	0	43.202	43.4376	37.1686	37.2154	17.2197	43.2128	0	0	0	0	0	0	0	0	0	0	0	0	0	0	0	0	0	0	0	0	0	0	0	0	0
1197	Q9NRY5	FAM114A2	Protein FAM114A2 OS=Homo sapiens OX=9606 GN=FAM114A2 PE=1 SV=4					1	0	0	0	0	0	0	0	0	0	0	158.587	182.063	162.398	167.269	213.061	163.23	0	0	0	0	0	0	0	0	0	0	0	0	0	0	0	0	0	0	0	0	0	0	0	0	0
1198	Q9BPY3	FAM118B	Protein FAM118B OS=Homo sapiens OX=9606 GN=FAM118B PE=1 SV=1					1	0	0	0	0	0	0	0	0	0	0	11.8713	13.3597	9.3525	14.0876	17.5649	11.3647	0	0	0	0	0	0	0	0	0	0	0	0	0	0	0	0	0	0	0	0	0	0	0	0	0
1199	Q9NZB2	FAM120A	Constitutive coactivator of PPAR-gamma-like protein 1 OS=Homo sapiens OX=9606 GN=FAM120A PE=1 SV=2					0	3	3	4	5	5	3	2	5	3	3	0	0	0	0	0	0	184.93	175.51	170.805	199.143	138.912	172.937	243.606	203.109	204.346	234.132	216.502	230.979	321.4	304.992	305.696	360.453	354.903	318.132	923.68	861.804	910.457	795.471	729.685	770.473	504.031
1200	Q96EK7	FAM120B	Constitutive coactivator of peroxisome proliferator-activated receptor gamma OS=Homo sapiens OX=9606 GN=FAM120B PE=1 SV=1					0	0	1	0	0	0	0	0	1	0	0	0	0	0	0	0	0	0	0	0	0	0	0	66.1483	81.3399	44.5989	65.3506	56.7738	65.1651	0	0	0	0	0	0	0	0	0	0	0	0	0
1201	Q7Z309	FAM122B	Protein FAM122B OS=Homo sapiens OX=9606 GN=FAM122B PE=1 SV=2					1	0	0	0	0	0	0	0	0	0	0	21.5131	18.5767	23.1685	18.5289	0	16.9185	0	0	0	0	0	0	0	0	0	0	0	0	0	0	0	0	0	0	0	0	0	0	0	0	0
1202	Q9BYI3	FAM126A	Hyccin OS=Homo sapiens OX=9606 GN=FAM126A PE=1 SV=2					0	0	1	0	0	0	0	0	1	0	0	0	0	0	0	0	0	0	0	0	0	0	0	49.473	44.674	41.0743	46.1772	49.9406	43.6053	0	0	0	0	0	0	0	0	0	0	0	0	0
1203	Q96TA1	FAM129B	Niban-like protein 1 OS=Homo sapiens OX=9606 GN=FAM129B PE=1 SV=3					2	3	1	0	0	0	0	0	0	0	0	43.3603	44.2221	36.9821	42.7135	22.7367	47.1002	185.81	184.556	187.313	192.837	72.7652	206.735	80.5939	81.9812	73.7624	92.3859	84.0095	86.2515	0	0	0	0	0	0	0	0	0	0	0	0	0
1204	Q8N612	FAM160A2	FTS and Hook-interacting protein OS=Homo sapiens OX=9606 GN=FAM160A2 PE=1 SV=3					0	0	1	0	0	0	0	0	0	0	0	0	0	0	0	0	0	0	0	0	0	0	0	56.2351	48.5009	41.2786	49.841	50.6823	47.9429	0	0	0	0	0	0	0	0	0	0	0	0	0
1205	Q5W0V3	FAM160B1	Protein FAM160B1 OS=Homo sapiens OX=9606 GN=FAM160B1 PE=1 SV=1					0	1	1	0	1	0	0	0	0	0	0	0	0	0	0	0	0	105.936	93.8368	97.1069	98.0067	130.153	97.0785	150.681	136.801	116.955	151.926	138.155	144.138	0	0	0	0	0	0	100.615	98.6857	115.472	112.233	111.781	96.1269	0
1206	Q96A26	FAM162A	Protein FAM162A OS=Homo sapiens OX=9606 GN=FAM162A PE=1 SV=2					3	0	1	1	1	1	0	1	0	0	0	120.242	165.081	146.137	129.247	118.008	157.927	0	0	0	0	0	0	28.1179	25.2158	21.0243	26.5768	29.9908	38.0428	48.3215	44.177	46.9474	53.7082	52.1817	75.306	60.7615	67.0492	78.14	74.3482	68.4858	93.7025	150.606
1207	Q9GZU8	FAM192A	PSME3-interacting protein OS=Homo sapiens OX=9606 GN=FAM192A PE=1 SV=1					0	2	0	0	0	0	0	0	0	0	0	0	0	0	0	0	0	29.689	30.5711	31.8392	33.5878	19.0339	30.9422	0	0	0	0	0	0	0	0	0	0	0	0	0	0	0	0	0	0	0
1208	P78312	FAM193A	Protein FAM193A OS=Homo sapiens OX=9606 GN=FAM193A PE=1 SV=2					0	0	1	0	0	0	0	0	0	0	0	0	0	0	0	0	0	0	0	0	0	0	0	25.4755	24.7566	20.512	22.2103	27.9236	24.2457	0	0	0	0	0	0	0	0	0	0	0	0	0
1209	Q9NSI2	FAM207A	Protein FAM207A OS=Homo sapiens OX=9606 GN=FAM207A PE=1 SV=2					0	0	2	1	0	2	1	2	0	0	2	0	0	0	0	0	0	0	0	0	0	0	0	147.917	123.975	132.67	134.135	118.33	115.896	25.0198	19.6615	19.1742	24.6424	21.7981	23.5161	0	0	0	0	0	0	115.327
1210	Q9UK61	FAM208A	Protein TASOR OS=Homo sapiens OX=9606 GN=FAM208A PE=1 SV=3					0	0	1	1	1	2	0	0	1	1	0	0	0	0	0	0	0	0	0	0	0	0	0	12.548	15.1282	12.3511	13.6496	11.7651	14.8853	147.398	173.918	187.888	213.417	240.57	210.913	161.504	168.486	195.951	221.533	224.706	221.494	77.8974
1211	Q96ND0	FAM210A	Protein FAM210A OS=Homo sapiens OX=9606 GN=FAM210A PE=1 SV=2					0	0	0	0	0	1	0	1	0	0	0	0	0	0	0	0	0	0	0	0	0	0	0	0	0	0	0	0	0	0	0	0	0	0	0	0	0	0	0	0	0	17.7602
1212	Q92520	FAM3C	Protein FAM3C OS=Homo sapiens OX=9606 GN=FAM3C PE=1 SV=1					1	0	1	0	0	0	0	0	0	0	0	34.8856	43.5324	42.5521	41.14	50.5397	39.8926	0	0	0	0	0	0	22.3826	18.9856	20.7816	23.9635	20.4741	22.2289	0	0	0	0	0	0	0	0	0	0	0	0	0
1213	Q8TCE6	FAM45A	Protein FAM45A OS=Homo sapiens OX=9606 GN=FAM45A PE=2 SV=1					0	1	0	0	0	0	0	0	0	0	0	0	0	0	0	0	0	47.9322	50.9624	53.9104	59.467	23.3595	55.5299	0	0	0	0	0	0	0	0	0	0	0	0	0	0	0	0	0	0	0
1214	Q9NUQ9	FAM49B	Protein FAM49B OS=Homo sapiens OX=9606 GN=FAM49B PE=1 SV=1					1	1	1	0	0	0	0	0	0	0	0	16.4565	15.6519	11.6325	16.6138	2.83595	15.342	141.511	138.713	129.935	147.854	36.8091	168.314	23.8864	22.906	21.1234	31.3271	25.6036	25.5371	0	0	0	0	0	0	0	0	0	0	0	0	0
1215	Q14320	FAM50A	Protein FAM50A OS=Homo sapiens OX=9606 GN=FAM50A PE=1 SV=2					1	0	0	0	0	0	0	0	0	0	0	12.3736	13.7773	11.4417	16.0878	15.6764	13.5534	0	0	0	0	0	0	0	0	0	0	0	0	0	0	0	0	0	0	0	0	0	0	0	0	0
1216	Q6ZRV2	FAM83H	Protein FAM83H OS=Homo sapiens OX=9606 GN=FAM83H PE=1 SV=3					0	0	2	2	1	1	2	0	3	0	0	0	0	0	0	0	0	0	0	0	0	0	0	32.4469	30.4088	31.2237	35.7844	32.4203	34.0215	92.9948	97.8519	96.0965	117.757	100.574	92.2776	37.6206	35.2188	40.8083	37.4496	36.5384	36.7042	44.0149
1217	Q96GI7	FAM89A	Protein FAM89A OS=Homo sapiens OX=9606 GN=FAM89A PE=1 SV=1					0	0	1	0	0	2	0	0	0	0	0	0	0	0	0	0	0	0	0	0	0	0	0	56.3826	46.0071	43.0434	61.4985	52.4222	61.8301	0	0	0	0	0	0	0	0	0	0	0	0	116.758
1218	Q658Y4	FAM91A1	Protein FAM91A1 OS=Homo sapiens OX=9606 GN=FAM91A1 PE=1 SV=3					1	2	2	0	1	2	2	2	1	0	0	15.0038	17.1258	14.0967	16.0764	20.8436	16.5639	105.713	100.717	105.369	122.565	137.512	108.876	38.6379	32.2947	28.3186	44.0359	36.9624	37.6713	0	0	0	0	0	0	26.5194	23.6301	34.6839	41.6644	31.9251	27.3686	48.7048
1219	Q8NCA5	FAM98A	Protein FAM98A OS=Homo sapiens OX=9606 GN=FAM98A PE=1 SV=1					0	0	3	1	2	3	3	1	4	3	1	0	0	0	0	0	0	0	0	0	0	0	0	149.006	140.39	135.715	201.218	139.476	184.37	29.6071	26.3028	23.9638	34.8536	25.8523	38.7911	176.781	166.268	204.628	251.818	186.772	212.884	183.935
1220	Q52LJ0	FAM98B	Protein FAM98B OS=Homo sapiens OX=9606 GN=FAM98B PE=1 SV=1					1	3	3	3	2	2	3	3	2	1	2	110.153	119.539	104.881	111.867	173.201	92.9909	194.798	184.703	195.048	202.306	228.803	196.986	156.846	152.059	141.349	173.191	140.727	183.64	85.8398	54.1285	59.7205	77.5209	67.6116	75.1132	118.943	92.5589	102.391	123.621	93.9982	112	78.0299
1221	O15360	FANCA	Fanconi anemia group A protein OS=Homo sapiens OX=9606 GN=FANCA PE=1 SV=2					0	0	2	2	1	1	0	2	0	0	1	0	0	0	0	0	0	0	0	0	0	0	0	69.2634	61.9857	65.7253	68.5104	63.2251	71.957	92.0101	86.625	87.1755	111.789	116.874	105.741	69.9159	57.6188	74.0184	75.819	78.7655	69.0704	51.7918
1222	Q9BXW9	FANCD2	Fanconi anemia group D2 protein OS=Homo sapiens OX=9606 GN=FANCD2 PE=1 SV=2					0	0	1	0	2	1	1	1	1	0	0	0	0	0	0	0	0	0	0	0	0	0	0	135.969	119.083	87.9655	135.494	126.606	108.795	0	0	0	0	0	0	71.402	79.4229	90.0614	82.7011	92.6129	81.7788	237.783
1223	Q9NVI1	FANCI	Fanconi anemia group I protein OS=Homo sapiens OX=9606 GN=FANCI PE=1 SV=4					2	3	2	2	0	3	3	1	1	0	2	79.3498	78.0123	74.293	90.6305	95.3391	71.3968	119.107	115.989	117.795	126.991	123.508	126.046	249.854	252.37	165.392	252.715	236.65	237.156	66.3776	77.2143	77.8363	73.7566	75.1473	77.3464	0	0	0	0	0	0	314.925
1224	Q8WVX9	FAR1	Fatty acyl-CoA reductase 1 OS=Homo sapiens OX=9606 GN=FAR1 PE=1 SV=1					0	0	2	2	4	2	2	1	2	0	0	0	0	0	0	0	0	0	0	0	0	0	0	96.2148	96.7582	76.4936	108.003	94.2748	100.31	87.919	74.6389	81.3658	97.9188	100.792	93.267	384.083	424.406	410.624	474.564	499.356	453.35	88.4689
1225	Q9Y285	FARSA	Phenylalanine--tRNA ligase alpha subunit OS=Homo sapiens OX=9606 GN=FARSA PE=1 SV=3					2	3	2	0	3	1	2	0	1	0	1	55.072	54.9677	57.6018	57.9819	35.6603	49.3358	234.681	234.548	228.77	272.669	286.515	339.095	71.7575	69.3016	58.2754	72.4174	64.2711	88.2257	0	0	0	0	0	0	244.969	234.899	272.769	242.836	224.988	267.218	100.467
1226	Q9NSD9	FARSB	Phenylalanine--tRNA ligase beta subunit OS=Homo sapiens OX=9606 GN=FARSB PE=1 SV=3					4	2	4	1	3	1	1	0	1	0	0	275.809	278.699	269.89	273.5	348.774	215.779	74.5399	73.8284	57.7693	70.2561	48.2556	90.3234	293.135	278.341	259.08	276.358	225.454	319.077	65.4251	67.6334	68.8617	70.4985	56.9747	89.2355	210.233	201.523	222.475	209.673	189.746	228.335	137.594
1227	P49327	FASN	Fatty acid synthase OS=Homo sapiens OX=9606 GN=FASN PE=1 SV=3					0	6	8	6	4	5	5	8	7	7	9	0	0	0	0	0	0	535.627	483.037	483.59	676.383	109.348	507.709	223.592	193.179	214.696	287.235	234.284	219.663	736.75	533.633	620.123	793.802	916.306	865.02	362.236	303.915	320.747	365.969	385.334	426.682	527.579
1228	Q9NYY8	FASTKD2	FAST kinase domain-containing protein 2, mitochondrial OS=Homo sapiens OX=9606 GN=FASTKD2 PE=1 SV=1					0	3	3	1	2	3	2	2	1	3	2	0	0	0	0	0	0	104.857	102.706	99.6977	112.248	69.0814	108.521	206.19	191.149	188.104	218.561	195.761	204.185	65.373	60.2119	78.141	84.581	85.57	74.2359	205.876	229.289	262.172	268.934	290.786	239.198	312.638
1229	Q7L8L6	FASTKD5	FAST kinase domain-containing protein 5, mitochondrial OS=Homo sapiens OX=9606 GN=FASTKD5 PE=1 SV=1					0	0	1	0	0	0	1	0	0	0	0	0	0	0	0	0	0	0	0	0	0	0	0	21.7837	14.9044	16.6146	22.4261	19.7787	19.2462	0	0	0	0	0	0	0	0	0	0	0	0	0
1230	Q14517	FAT1	Protocadherin Fat 1 OS=Homo sapiens OX=9606 GN=FAT1 PE=1 SV=2					0	3	4	3	4	3	3	3	4	3	3	0	0	0	0	0	0	203.434	172.573	198.613	179.77	240.079	150.348	387.768	355.357	373.792	385.743	361.206	358.813	136.414	136.398	140.605	160.201	167.524	152.271	224.081	242.287	267.066	260.972	258.176	249.861	179.61
1231	P62861	FAU	40S ribosomal protein S30 OS=Homo sapiens OX=9606 GN=FAU PE=1 SV=1					0	0	1	2	3	2	3	3	4	3	2	0	0	0	0	0	0	0	0	0	0	0	0	165.876	138.366	127.041	153.046	120.356	132.035	689.907	509.516	599.395	289.697	227.723	239.846	1870.95	1622.62	1753.86	806.428	776.197	720.576	1051.47
1232	P22087	FBL	rRNA 2'-O-methyltransferase fibrillarin OS=Homo sapiens OX=9606 GN=FBL PE=1 SV=2					0	3	1	2	6	4	6	7	6	5	3	0	0	0	0	0	0	462.169	485.605	468.264	466.504	83.3361	561.696	273.27	265.027	258.974	287.186	249.378	292.21	219.505	179.762	165.277	131.733	110.159	154.376	1612.95	1518.39	1622.53	1134.53	970.082	1195.24	483.335
1233	Q9NXK8	FBXL12	F-box/LRR-repeat protein 12 OS=Homo sapiens OX=9606 GN=FBXL12 PE=1 SV=1					0	0	0	1	0	0	0	0	0	0	0	0	0	0	0	0	0	0	0	0	0	0	0	0	0	0	0	0	0	61.3974	79.8618	76.4391	92.3501	109.749	96.1774	0	0	0	0	0	0	0
1234	Q96ME1	FBXL18	F-box/LRR-repeat protein 18 OS=Homo sapiens OX=9606 GN=FBXL18 PE=1 SV=2					0	0	1	0	0	0	0	1	0	0	0	0	0	0	0	0	0	0	0	0	0	0	0	73.8718	62.3393	60.935	82.7353	68.5222	69.7134	0	0	0	0	0	0	0	0	0	0	0	0	0
1235	Q8N531	FBXL6	F-box/LRR-repeat protein 6 OS=Homo sapiens OX=9606 GN=FBXL6 PE=2 SV=1					0	0	2	1	1	0	1	1	2	0	2	0	0	0	0	0	0	0	0	0	0	0	0	457.055	427.724	368.736	523.865	485.134	420.901	59.8852	53.1472	59.3456	63.2396	67.5671	68.8452	51.5542	51.9431	59.1574	60.8149	65.0579	54.1566	0
1236	Q86XK2	FBXO11	F-box only protein 11 OS=Homo sapiens OX=9606 GN=FBXO11 PE=1 SV=3					0	0	0	1	1	1	2	2	2	1	1	0	0	0	0	0	0	0	0	0	0	0	0	0	0	0	0	0	0	50.0727	45.969	45.1383	56.6754	53.0926	59.3607	75.0176	69.4772	60.0932	70.3534	64.979	59.8965	57.2576
1237	Q9UK22	FBXO2	F-box only protein 2 OS=Homo sapiens OX=9606 GN=FBXO2 PE=1 SV=2					0	3	1	0	1	1	2	3	2	1	2	0	0	0	0	0	0	406.262	349.495	413.26	448.789	115.788	445.463	135.28	110.533	49.3302	122.374	116.555	124.932	0	0	0	0	0	0	148.478	116.514	114.132	146.064	136.368	149.651	136.352
1238	O94952	FBXO21	F-box only protein 21 OS=Homo sapiens OX=9606 GN=FBXO21 PE=2 SV=2					1	1	0	0	0	0	0	0	0	0	0	19.8053	24.8689	19.9506	26.1866	16.2284	21.7279	61.1618	54.3105	49.193	60.8309	11.7734	67.4508	0	0	0	0	0	0	0	0	0	0	0	0	0	0	0	0	0	0	0
1239	Q8NEZ5	FBXO22	F-box only protein 22 OS=Homo sapiens OX=9606 GN=FBXO22 PE=1 SV=1					1	2	0	1	1	1	1	0	0	1	1	289.346	299.481	278.832	357.008	542.245	278.948	214.485	209.612	195.799	227.706	283.198	211.624	0	0	0	0	0	0	222.518	260.826	259.651	332.262	286.359	295.517	31.5714	36.8503	32.92	34.7143	35.2278	32.9168	102.443
1240	Q9UK99	FBXO3	F-box only protein 3 OS=Homo sapiens OX=9606 GN=FBXO3 PE=1 SV=3					0	0	0	1	0	0	0	0	0	0	0	0	0	0	0	0	0	0	0	0	0	0	0	0	0	0	0	0	0	41.0784	47.5214	39.6427	52.1069	55.7917	44.0757	0	0	0	0	0	0	0
1241	Q6PIJ6	FBXO38	F-box only protein 38 OS=Homo sapiens OX=9606 GN=FBXO38 PE=1 SV=3					0	1	0	0	0	0	0	0	0	0	0	0	0	0	0	0	0	36.5062	41.308	43.0952	44.5722	25.6023	43.6281	0	0	0	0	0	0	0	0	0	0	0	0	0	0	0	0	0	0	0
1242	Q9UKT4	FBXO5	F-box only protein 5 OS=Homo sapiens OX=9606 GN=FBXO5 PE=1 SV=1					0	0	1	1	0	0	0	2	0	0	0	0	0	0	0	0	0	0	0	0	0	0	0	253.277	249.17	215.432	198.088	187.654	198.615	278.327	279.596	243.31	292.719	262.983	289.829	0	0	0	0	0	0	0
1243	Q9Y3I1	FBXO7	F-box only protein 7 OS=Homo sapiens OX=9606 GN=FBXO7 PE=1 SV=1					2	1	1	0	0	0	0	1	0	0	0	42.3793	33.7801	32.5599	39.0268	6.16384	39.6537	31.5794	29.7369	33.1193	32.1295	31.3367	31.0257	21.9817	21.3132	18.9842	19.6648	23.3645	22.122	0	0	0	0	0	0	0	0	0	0	0	0	0
1244	Q9UK97	FBXO9	F-box only protein 9 OS=Homo sapiens OX=9606 GN=FBXO9 PE=1 SV=1					0	0	0	0	0	0	1	0	0	0	0	0	0	0	0	0	0	0	0	0	0	0	0	0	0	0	0	0	0	0	0	0	0	0	0	0	0	0	0	0	0	0
1245	Q9UKB1	FBXW11	F-box/WD repeat-containing protein 11 OS=Homo sapiens OX=9606 GN=FBXW11 PE=1 SV=1					0	0	1	1	1	1	0	0	1	1	1	0	0	0	0	0	0	0	0	0	0	0	0	38.0683	35.5898	44.6027	53.6773	40.1456	41.5988	37.7338	44.9282	41.2591	55.394	49.4423	47.378	47.71	58.0285	63.4827	62.9463	60.175	60.4022	42.285
1246	P37268	FDFT1	Squalene synthase OS=Homo sapiens OX=9606 GN=FDFT1 PE=1 SV=1					1	2	2	0	1	1	0	0	1	2	0	159.041	140.785	130.141	140.036	15.7412	129.369	44.4384	44.1144	33.7722	48.0718	0	46.5129	61.3796	61.1064	41.4086	61.0776	74.9642	62.1409	0	0	0	0	0	0	21.9866	24.3321	30.0411	29.4042	32.4049	26.9217	28.8544
1247	P14324	FDPS	Farnesyl pyrophosphate synthase OS=Homo sapiens OX=9606 GN=FDPS PE=1 SV=4					2	3	1	2	2	2	3	1	1	2	0	39.0405	47.2591	40.3474	45.9341	33.6823	36.5229	218.975	222.936	198.432	245.043	152.572	240.977	39.988	33.6976	26.0159	43.3291	41.1683	41.6268	39.953	44.5814	45.5221	53.2119	54.3847	56.5114	77.19	91.2814	95.7207	114.395	113.077	102.918	114.514
1248	P10109	FDX1	Adrenodoxin, mitochondrial OS=Homo sapiens OX=9606 GN=FDX1 PE=1 SV=1					1	0	0	0	0	0	0	0	0	0	0	35.0757	40.8258	32.9236	35.2508	6.88327	42.1325	0	0	0	0	0	0	0	0	0	0	0	0	0	0	0	0	0	0	0	0	0	0	0	0	0
1249	P22570	FDXR	NADPH:adrenodoxin oxidoreductase, mitochondrial OS=Homo sapiens OX=9606 GN=FDXR PE=1 SV=3					3	3	2	2	0	1	0	1	1	0	1	116.266	111.315	108.292	132.186	77.6969	125.129	283.527	252.203	269.85	269.878	282.437	255.407	149	130.351	110.461	138.572	136.122	121.695	78.4493	69.8156	74.1584	81.1941	80.3837	75.0648	0	0	0	0	0	0	161.708
1250	P22830	FECH	Ferrochelatase, mitochondrial OS=Homo sapiens OX=9606 GN=FECH PE=1 SV=2					0	0	3	4	2	4	1	1	0	0	1	0	0	0	0	0	0	0	0	0	0	0	0	114.648	114.194	93.2173	123.936	109.782	111.416	225.69	211.916	227.669	283.898	247.95	241.295	213.971	226.175	249.573	241.291	258.056	238.273	253.585
1251	P39748	FEN1	Flap endonuclease 1 OS=Homo sapiens OX=9606 GN=FEN1 PE=1 SV=1					5	4	3	4	3	3	2	3	2	4	2	216.787	223.757	208.998	237.36	367.694	218.376	343.939	318.865	339.915	375.72	552.574	304.044	264.614	229.456	291.892	263.517	243.19	237.823	452.266	261.207	507.378	459.004	449.988	335.076	424.6	371.083	365.441	350.692	364.699	341.007	487.652
1252	Q9BQL6	FERMT1	Fermitin family homolog 1 OS=Homo sapiens OX=9606 GN=FERMT1 PE=1 SV=1					1	3	3	0	4	1	2	3	3	2	2	72.1136	70.9105	70.1492	86.3023	111.056	59.603	354.659	318.343	329.848	373.767	467.081	338.369	224.368	209.449	209.111	237.646	215.53	235.064	0	0	0	0	0	0	434.371	435.462	498.225	503.066	510.404	481.533	80.8408
1253	Q96AC1	FERMT2	Fermitin family homolog 2 OS=Homo sapiens OX=9606 GN=FERMT2 PE=1 SV=1					2	2	3	1	0	1	2	0	1	0	0	200.656	183.001	177.616	233.199	258.163	194.4	179.552	199.036	184.71	198.894	163.177	187.854	183.69	183.93	163.074	175.582	179.892	178.804	60.9119	69.8399	66.8317	68.7994	68.0701	63.9615	0	0	0	0	0	0	65.4441
1254	P07954	FH	Fumarate hydratase, mitochondrial OS=Homo sapiens OX=9606 GN=FH PE=1 SV=3					2	3	2	0	0	0	0	0	0	0	0	110.038	107.617	103.794	108.967	83.2681	95.294	367.412	394.837	317.921	371.177	393.551	465.148	35.6957	33.7803	29.3235	36.9938	29.036	30.1807	0	0	0	0	0	0	0	0	0	0	0	0	0
1255	Q14192	FHL2	Four and a half LIM domains protein 2 OS=Homo sapiens OX=9606 GN=FHL2 PE=1 SV=3					0	0	0	0	0	0	1	0	0	0	0	0	0	0	0	0	0	0	0	0	0	0	0	0	0	0	0	0	0	0	0	0	0	0	0	0	0	0	0	0	0	0
1256	Q9Y613	FHOD1	FH1/FH2 domain-containing protein 1 OS=Homo sapiens OX=9606 GN=FHOD1 PE=1 SV=3					0	1	2	0	0	0	2	1	0	0	0	0	0	0	0	0	0	63.8403	57.3968	57.8215	71.8665	20.0395	73.6708	37.792	41.0384	42.8331	44.8189	44.2453	53.9933	0	0	0	0	0	0	0	0	0	0	0	0	0
1257	O43427	FIBP	Acidic fibroblast growth factor intracellular-binding protein OS=Homo sapiens OX=9606 GN=FIBP PE=1 SV=3					0	0	1	0	0	0	0	0	0	0	0	0	0	0	0	0	0	0	0	0	0	0	0	16.3496	14.4422	16.2872	21.4401	18.9756	17.355	0	0	0	0	0	0	0	0	0	0	0	0	0
1258	Q6PIW4	FIGNL1	Fidgetin-like protein 1 OS=Homo sapiens OX=9606 GN=FIGNL1 PE=1 SV=2					1	1	1	1	0	1	0	1	0	1	0	54.8803	52.2262	50.3794	57.3289	11.5357	57.1827	92.907	84.9978	88.654	100.264	49.2239	106.177	128.653	121.462	124.23	124.179	128.535	125.078	94.5269	81.2411	87.816	95.437	88.1215	89.1306	0	0	0	0	0	0	208.255
1259	Q6UN15	FIP1L1	Pre-mRNA 3'-end-processing factor FIP1 OS=Homo sapiens OX=9606 GN=FIP1L1 PE=1 SV=1					0	4	4	5	4	4	3	3	3	3	3	0	0	0	0	0	0	232.646	213.663	242.345	261.087	260.748	225.501	209.617	197.76	203.698	249.83	245.903	250.661	243.078	221.211	215.421	311.317	279.315	291.746	353.43	350.443	358.058	391.497	370.878	347.081	242.33
1260	Q9Y3D6	FIS1	Mitochondrial fission 1 protein OS=Homo sapiens OX=9606 GN=FIS1 PE=1 SV=2					0	0	1	0	0	0	0	0	0	0	0	0	0	0	0	0	0	0	0	0	0	0	0	154.878	161.92	135.011	187.966	176.482	194.273	0	0	0	0	0	0	0	0	0	0	0	0	0
1261	Q96AY3	FKBP10	Peptidyl-prolyl cis-trans isomerase FKBP10 OS=Homo sapiens OX=9606 GN=FKBP10 PE=1 SV=1					3	1	0	0	0	0	0	0	0	0	0	269.35	251.263	253.235	289.799	210.369	247.705	78.1762	66.1098	70.8453	71.7087	105.772	96.4992	0	0	0	0	0	0	0	0	0	0	0	0	0	0	0	0	0	0	0
1262	P62942	FKBP1A	Peptidyl-prolyl cis-trans isomerase FKBP1A OS=Homo sapiens OX=9606 GN=FKBP1A PE=1 SV=2					1	0	0	0	0	0	0	0	0	0	0	12.8092	18.1843	16.2886	14.7734	0	16.6017	0	0	0	0	0	0	0	0	0	0	0	0	0	0	0	0	0	0	0	0	0	0	0	0	0
1263	P26885	FKBP2	Peptidyl-prolyl cis-trans isomerase FKBP2 OS=Homo sapiens OX=9606 GN=FKBP2 PE=1 SV=2					4	0	0	0	0	0	0	0	0	0	0	176.893	202.828	214.251	197.54	258.243	192.278	0	0	0	0	0	0	0	0	0	0	0	0	0	0	0	0	0	0	0	0	0	0	0	0	0
1264	Q00688	FKBP3	Peptidyl-prolyl cis-trans isomerase FKBP3 OS=Homo sapiens OX=9606 GN=FKBP3 PE=1 SV=1					1	3	1	0	0	0	0	0	0	0	0	13.3344	9.68521	11.918	15.3028	183.421	8.30644	328.773	307.445	265.911	340.611	113.249	373.426	150.214	159.801	87.4821	206.442	144.488	223.721	0	0	0	0	0	0	0	0	0	0	0	0	0
1265	Q02790	FKBP4	Peptidyl-prolyl cis-trans isomerase FKBP4 OS=Homo sapiens OX=9606 GN=FKBP4 PE=1 SV=3					1	5	3	2	2	3	3	2	4	4	3	112.32	119.715	112.252	126.139	155.052	110.673	425.328	385.566	385.589	457.292	463.31	507.095	292.981	276.392	286.969	309.862	302.783	381.121	176.096	179.144	175.167	191.983	181.357	189.585	167.483	163.507	165.977	170.433	186.8	206.788	247.7
1266	Q13451	FKBP5	Peptidyl-prolyl cis-trans isomerase FKBP5 OS=Homo sapiens OX=9606 GN=FKBP5 PE=1 SV=2					2	2	3	3	3	3	4	2	3	4	2	69.7257	72.5844	64.5466	83.3496	33.356	69.8403	148.881	127.702	143.207	164.734	151.041	171.86	291.433	287.23	268.915	324.562	314.491	310.462	227.656	234.042	195.966	264.589	264.783	300.567	192.493	203.958	242.011	283.777	242.331	237.003	244.278
1267	Q14318	FKBP8	Peptidyl-prolyl cis-trans isomerase FKBP8 OS=Homo sapiens OX=9606 GN=FKBP8 PE=1 SV=2					0	3	1	1	1	1	2	1	1	2	0	0	0	0	0	0	0	97.4192	82.9598	92.106	102.458	79.5738	91.0296	12.0494	16.5595	12.3573	11.1195	11.302	15.1391	27.9174	32.0615	25.723	29.1841	34.1423	32.9383	18.8484	17.7105	14.3597	18.2055	19.8224	18.3351	22.9898
1268	O95302	FKBP9	Peptidyl-prolyl cis-trans isomerase FKBP9 OS=Homo sapiens OX=9606 GN=FKBP9 PE=1 SV=2					1	0	0	0	0	0	0	0	0	0	0	57.3439	58.2683	56.3665	60.5045	86.8891	64.4308	0	0	0	0	0	0	0	0	0	0	0	0	0	0	0	0	0	0	0	0	0	0	0	0	0
1269	Q8NFF5	FLAD1	FAD synthase OS=Homo sapiens OX=9606 GN=FLAD1 PE=1 SV=1					3	1	3	0	0	0	0	1	0	0	0	80.4928	79.2491	72.0941	98.1704	30.8191	84.5718	116.858	123.276	122.832	121.727	39.4373	116.424	188.05	179.483	157.83	202.805	203.107	179.996	0	0	0	0	0	0	0	0	0	0	0	0	0
1270	Q13045	FLII	Protein flightless-1 homolog OS=Homo sapiens OX=9606 GN=FLII PE=1 SV=2					2	2	2	2	2	1	2	1	1	0	4	58.7311	55.3044	55.6243	66.7405	62.3174	51.9997	35.6902	35.9154	36.7587	42.6885	34.6515	41.6621	85.9341	87.6505	77.3022	95.1709	74.5161	104.01	130.733	139.851	136.139	173.414	170.417	168.833	37.7687	33.9764	36.7977	40.6799	34.0991	36.5998	68.9433
1271	P21333	FLNA	Filamin-A OS=Homo sapiens OX=9606 GN=FLNA PE=1 SV=4					4	3	2	3	3	4	1	0	0	1	1	222.205	224.253	218.547	222.117	169.622	201.09	317.363	295.862	273.518	311.266	103.371	359.672	260.383	240.143	264.599	312.608	304.293	278.009	139.264	144.283	138.479	165.412	176.309	178.282	81.4028	78.1149	89.2944	91.1666	83.5721	95.8145	181.828
1272	O75369	FLNB	Filamin-B OS=Homo sapiens OX=9606 GN=FLNB PE=1 SV=2					3	4	1	1	0	0	0	0	0	0	0	102.229	96.2073	94.2832	101.817	81.9525	84.9891	332.374	329.661	330.199	310.313	394.261	325.923	45.3315	41.0404	40.8978	46.6126	52.6936	43.0411	90.6936	75.3887	79.7978	85.761	88.911	86.7551	0	0	0	0	0	0	0
1273	Q14315	FLNC	Filamin-C OS=Homo sapiens OX=9606 GN=FLNC PE=1 SV=3					3	5	4	2	1	3	1	1	1	0	0	288.954	262.898	286.932	300.366	388.262	237.131	739.686	710.664	650.926	703.828	363.666	793.235	585.156	549.357	502.283	616.571	575.076	574.557	133.925	125.492	133.215	137.031	143.621	140.084	101.255	102.379	105.285	91.3141	101.709	100.866	394.193
1274	O75955	FLOT1	Flotillin-1 OS=Homo sapiens OX=9606 GN=FLOT1 PE=1 SV=3					0	0	0	0	0	3	1	2	1	2	3	0	0	0	0	0	0	0	0	0	0	0	0	0	0	0	0	0	0	0	0	0	0	0	0	0	0	0	0	0	0	250.676
1275	Q14254	FLOT2	Flotillin-2 OS=Homo sapiens OX=9606 GN=FLOT2 PE=1 SV=2					0	0	0	1	0	2	1	2	1	1	2	0	0	0	0	0	0	0	0	0	0	0	0	0	0	0	0	0	0	141.303	140.005	154.132	193.508	195.328	169.313	0	0	0	0	0	0	236.168
1276	Q96PY5	FMNL2	Formin-like protein 2 OS=Homo sapiens OX=9606 GN=FMNL2 PE=1 SV=3					0	0	0	0	0	0	0	0	1	2	0	0	0	0	0	0	0	0	0	0	0	0	0	0	0	0	0	0	0	0	0	0	0	0	0	0	0	0	0	0	0	0
1277	Q06787	FMR1	Synaptic functional regulator FMR1 OS=Homo sapiens OX=9606 GN=FMR1 PE=1 SV=1					1	1	0	0	1	1	0	0	1	0	0	70.7088	64.8206	69.1932	74.205	16.3546	72.0334	30.5746	35.1565	25.578	34.0867	4.94609	37.3304	0	0	0	0	0	0	0	0	0	0	0	0	125.581	129.736	115.066	133.02	110.999	135.362	41.2188
1278	Q8N3X1	FNBP4	Formin-binding protein 4 OS=Homo sapiens OX=9606 GN=FNBP4 PE=1 SV=3					1	0	0	0	0	0	0	0	0	0	0	55.2352	61.4375	51.8743	62.4424	79.3266	54.2982	0	0	0	0	0	0	0	0	0	0	0	0	0	0	0	0	0	0	0	0	0	0	0	0	0
1279	Q9Y2H6	FNDC3A	Fibronectin type-III domain-containing protein 3A OS=Homo sapiens OX=9606 GN=FNDC3A PE=1 SV=4					0	1	2	1	1	0	0	0	0	0	0	0	0	0	0	0	0	51.9086	47.0299	46.0702	47.3415	53.194	52.2863	238.329	203.541	205.932	252.746	254.859	256.905	54.622	42.2364	53.1476	58.1549	57.3169	53.8614	73.2359	70.2239	73.4733	72.1373	66.0931	72.7809	0
1280	Q53EP0	FNDC3B	Fibronectin type III domain-containing protein 3B OS=Homo sapiens OX=9606 GN=FNDC3B PE=1 SV=2					0	0	2	1	2	2	2	1	3	2	0	0	0	0	0	0	0	0	0	0	0	0	0	89.7632	73.4384	70.1157	81.8648	73.8344	74.2411	86.8585	103.716	94.2587	133.769	127.079	110.233	144.175	132.874	160.826	170.474	149.018	147.13	133.398
1281	P49354	FNTA	Protein farnesyltransferase/geranylgeranyltransferase type-1 subunit alpha OS=Homo sapiens OX=9606 GN=FNTA PE=1 SV=1					2	0	0	0	0	0	0	0	0	0	0	82.8723	95.3786	85.3998	96.0419	40.5313	87.9518	0	0	0	0	0	0	0	0	0	0	0	0	0	0	0	0	0	0	0	0	0	0	0	0	0
1282	P49356	FNTB	Protein farnesyltransferase subunit beta OS=Homo sapiens OX=9606 GN=FNTB PE=1 SV=1					0	0	1	0	0	0	0	0	0	0	0	0	0	0	0	0	0	0	0	0	0	0	0	33.8388	29.1083	28.609	33.3444	33.3936	32.9504	0	0	0	0	0	0	0	0	0	0	0	0	0
1283	Q5VW36	FOCAD	Focadhesin OS=Homo sapiens OX=9606 GN=FOCAD PE=1 SV=1					0	1	1	1	2	2	1	0	1	0	0	0	0	0	0	0	0	126.896	118.547	116.766	125.876	158.99	120.498	59.4009	54.4108	55.1134	66.3836	54.223	61.8079	83.9885	85.2874	85.0676	100.846	86.5832	85.4606	126.96	124.784	130.496	149.374	144.17	137.738	172.697
1284	P15407	FOSL1	Fos-related antigen 1 OS=Homo sapiens OX=9606 GN=FOSL1 PE=1 SV=1					2	0	0	0	0	0	0	0	0	0	0	107.789	118.343	105.869	127.037	154.671	95.9392	0	0	0	0	0	0	0	0	0	0	0	0	0	0	0	0	0	0	0	0	0	0	0	0	0
1285	P85037	FOXK1	Forkhead box protein K1 OS=Homo sapiens OX=9606 GN=FOXK1 PE=1 SV=1					2	0	0	0	0	0	0	0	0	0	0	418.798	410.76	450.515	478.746	119.296	387.193	0	0	0	0	0	0	0	0	0	0	0	0	0	0	0	0	0	0	0	0	0	0	0	0	0
1286	Q01167	FOXK2	Forkhead box protein K2 OS=Homo sapiens OX=9606 GN=FOXK2 PE=1 SV=3					0	0	0	1	1	2	0	1	0	0	0	0	0	0	0	0	0	0	0	0	0	0	0	0	0	0	0	0	0	59.7329	43.8192	50.1324	61.5001	53.9822	55.8018	103.26	93.1693	102.718	98.82	111.718	100.434	134.083
1287	Q96CU9	FOXRED1	FAD-dependent oxidoreductase domain-containing protein 1 OS=Homo sapiens OX=9606 GN=FOXRED1 PE=1 SV=2					0	3	2	3	0	1	0	4	2	4	3	0	0	0	0	0	0	88.093	83.8364	89.2253	101.965	24.2985	96.0845	273.075	274.152	235.475	303.079	248.713	268.824	136.305	137.738	131.937	168.115	171.563	157.12	0	0	0	0	0	0	31.1822
1288	Q05932	FPGS	Folylpolyglutamate synthase, mitochondrial OS=Homo sapiens OX=9606 GN=FPGS PE=1 SV=3					0	1	3	1	2	0	0	1	1	0	1	0	0	0	0	0	0	56.7276	49.9049	50.6601	60.983	24.8449	54.5872	139.733	118.661	118.256	140.398	126.971	135.863	113.877	97.3465	112.224	125.616	111.478	130.375	81.4539	68.0684	79.7965	83.9413	87.0306	81.2172	0
1289	Q5SZK8	FREM2	FRAS1-related extracellular matrix protein 2 OS=Homo sapiens OX=9606 GN=FREM2 PE=1 SV=2					1	0	0	0	0	0	0	0	0	0	0	29.8008	32.7591	24.818	28.1543	14.0229	26.6149	0	0	0	0	0	0	0	0	0	0	0	0	0	0	0	0	0	0	0	0	0	0	0	0	0
1290	Q14331	FRG1	Protein FRG1 OS=Homo sapiens OX=9606 GN=FRG1 PE=1 SV=1					2	0	0	1	0	0	0	0	0	0	1	78.3856	95.3702	90.7628	97.2329	123.344	78.1578	0	0	0	0	0	0	0	0	0	0	0	0	101.805	100.476	101.614	96.2481	82.1469	96.3468	0	0	0	0	0	0	0
1291	Q5JV73	FRMPD3	FERM and PDZ domain-containing protein 3 OS=Homo sapiens OX=9606 GN=FRMPD3 PE=2 SV=2					1	0	0	0	0	0	0	0	0	0	0	18.6399	17.7448	18.991	21.8518	26.9532	18.0554	0	0	0	0	0	0	0	0	0	0	0	0	0	0	0	0	0	0	0	0	0	0	0	0	0
1292	O94915	FRYL	Protein furry homolog-like OS=Homo sapiens OX=9606 GN=FRYL PE=1 SV=2					0	2	3	2	2	3	3	1	3	2	3	0	0	0	0	0	0	153.415	133.443	133.437	163.188	207.11	121.856	438.385	358.718	232.963	453.168	383.674	329.021	296.154	317.573	294.785	464.894	358.219	346.236	95.1838	84.1239	99.3631	117.857	104.99	104.078	199.783
1293	Q16658	FSCN1	Fascin OS=Homo sapiens OX=9606 GN=FSCN1 PE=1 SV=3					3	4	3	3	4	3	4	5	2	2	3	349.156	333.373	313.16	363.764	44.7687	337.925	310.678	315.197	323.767	283.948	48.0797	294.002	201.259	225.79	188.625	178.562	209.738	165.134	234.665	263.721	241.84	242.962	281.719	228.874	363.648	447.344	478.246	423.24	456.126	381.37	308.212
1294	P02794	FTH1	Ferritin heavy chain OS=Homo sapiens OX=9606 GN=FTH1 PE=1 SV=2					0	1	0	0	0	0	0	0	0	1	0	0	0	0	0	0	0	21.2532	22.7424	25.8862	28.17	26.2637	24.219	0	0	0	0	0	0	0	0	0	0	0	0	0	0	0	0	0	0	0
1295	Q9C0B1	FTO	Alpha-ketoglutarate-dependent dioxygenase FTO OS=Homo sapiens OX=9606 GN=FTO PE=1 SV=3					2	0	0	0	0	0	0	0	0	0	0	55.4458	57.6215	55.2494	60.2039	58.889	56.8165	0	0	0	0	0	0	0	0	0	0	0	0	0	0	0	0	0	0	0	0	0	0	0	0	0
1296	Q9UET6	FTSJ1	Putative tRNA (cytidine(32)/guanosine(34)-2'-O)-methyltransferase OS=Homo sapiens OX=9606 GN=FTSJ1 PE=1 SV=2					0	0	1	1	1	1	1	2	2	1	1	0	0	0	0	0	0	0	0	0	0	0	0	198.769	165.936	182.023	211.935	185.069	182.532	159.529	135.647	155.11	190.198	167.939	165.586	278.944	252.213	309.251	272.04	261.997	252.916	174.068
1297	Q8IY81	FTSJ3	pre-rRNA processing protein FTSJ3 OS=Homo sapiens OX=9606 GN=FTSJ3 PE=1 SV=2					0	0	2	1	3	4	4	5	4	5	3	0	0	0	0	0	0	0	0	0	0	0	0	64.4633	53.3441	49.7681	76.5616	77.6335	86.3135	165.838	179.838	142.695	175.636	158.697	159.339	341.547	345.234	359.346	395.245	342.609	345.126	282.284
1298	Q96AE4	FUBP1	Far upstream element-binding protein 1 OS=Homo sapiens OX=9606 GN=FUBP1 PE=1 SV=3					3	4	2	2	0	1	0	0	0	2	0	103.506	112.438	103.931	107.101	223.145	97.0202	188.648	194.604	193.2	198.619	109.999	220.357	91.7779	74.9918	81.4952	86.4548	94.8076	105.808	152.049	123.453	135.057	157.358	146.721	143.921	0	0	0	0	0	0	85.1614
1299	Q96I24	FUBP3	Far upstream element-binding protein 3 OS=Homo sapiens OX=9606 GN=FUBP3 PE=1 SV=2					0	3	3	3	1	3	3	2	3	2	3	0	0	0	0	0	0	260.233	254.22	257.516	300.547	181.661	288.476	132.388	125.577	131.238	166.761	160.124	156.566	187.671	180.854	216.535	255.641	251.201	223.205	61.3991	52.9986	82.4263	75.3915	86.6013	57.5766	286.418
1300	P04066	FUCA1	Tissue alpha-L-fucosidase OS=Homo sapiens OX=9606 GN=FUCA1 PE=1 SV=4					1	0	0	0	0	0	0	0	0	0	0	55.5809	61.6152	50.9703	64.5006	19.2278	52.067	0	0	0	0	0	0	0	0	0	0	0	0	0	0	0	0	0	0	0	0	0	0	0	0	0
1301	Q9BTY2	FUCA2	Plasma alpha-L-fucosidase OS=Homo sapiens OX=9606 GN=FUCA2 PE=1 SV=2					1	0	0	0	0	0	0	0	0	0	0	38.3075	36.2024	38.3687	39.1504	50.2648	32.6669	0	0	0	0	0	0	0	0	0	0	0	0	0	0	0	0	0	0	0	0	0	0	0	0	0
1302	Q8IVP5	FUNDC1	FUN14 domain-containing protein 1 OS=Homo sapiens OX=9606 GN=FUNDC1 PE=1 SV=1					1	0	0	0	0	0	0	0	0	0	0	32.5391	33.7871	39.5062	34.9281	47.2488	35.4639	0	0	0	0	0	0	0	0	0	0	0	0	0	0	0	0	0	0	0	0	0	0	0	0	0
1303	P35637	FUS	RNA-binding protein FUS OS=Homo sapiens OX=9606 GN=FUS PE=1 SV=1					1	2	1	0	0	0	1	0	1	1	1	62.4605	60.1842	71.305	62.0588	80.3639	63.8071	202.479	210.341	178.952	259.021	138.298	390.483	70.3034	58.2948	63.9165	103.528	82.8169	137.316	0	0	0	0	0	0	0	0	0	0	0	0	0
1304	Q16595	FXN	Frataxin, mitochondrial OS=Homo sapiens OX=9606 GN=FXN PE=1 SV=2					1	0	0	0	0	0	0	0	0	0	0	31.2789	31.2101	36.2861	34.8956	40.9846	26.6717	0	0	0	0	0	0	0	0	0	0	0	0	0	0	0	0	0	0	0	0	0	0	0	0	0
1305	P51114	FXR1	Fragile X mental retardation syndrome-related protein 1 OS=Homo sapiens OX=9606 GN=FXR1 PE=1 SV=3					1	1	3	3	3	4	2	2	3	4	2	20.3475	21.5791	19.916	21.3453	194.051	9.87511	88.9457	85.0393	79.4982	99.6974	30.7039	98.9996	195.038	199.763	177.919	202.406	196.946	211.547	155.465	158.008	154.243	191.479	200.112	184.421	299.237	267	287.612	279.497	331.092	318.389	463.785
1306	P51116	FXR2	Fragile X mental retardation syndrome-related protein 2 OS=Homo sapiens OX=9606 GN=FXR2 PE=1 SV=2					3	2	1	1	1	1	0	3	0	1	2	158.544	148.378	151.613	161.997	49.6328	147.098	121.141	118.864	110.944	123.163	50.6706	130.752	99.7569	86.7252	81.6271	104.147	95.9883	96.8244	98.6468	107.369	110.348	119.268	135.202	115.077	92.6688	90.6469	94.9204	96.6025	92.8553	88.391	77.6975
1307	Q9BQS8	FYCO1	FYVE and coiled-coil domain-containing protein 1 OS=Homo sapiens OX=9606 GN=FYCO1 PE=1 SV=3					0	0	0	1	1	0	1	1	1	1	1	0	0	0	0	0	0	0	0	0	0	0	0	0	0	0	0	0	0	172.718	152.351	170.388	71.0152	64.5605	57.1336	229.705	205.399	209.897	122.828	95.9188	107.088	0
1308	Q13283	G3BP1	Ras GTPase-activating protein-binding protein 1 OS=Homo sapiens OX=9606 GN=G3BP1 PE=1 SV=1					4	3	4	3	1	4	4	4	4	2	3	480.905	507.452	498.328	625.276	45.3123	609.812	267.054	270.401	288.131	388.18	84.1119	451.97	490.936	438.369	460.36	920.596	657.401	865.019	584.768	420.75	421.284	841.132	503.849	849.192	476.809	330.133	331.057	376.99	226.419	402.407	1672.83
1309	Q9UN86	G3BP2	Ras GTPase-activating protein-binding protein 2 OS=Homo sapiens OX=9606 GN=G3BP2 PE=1 SV=2					3	3	3	4	4	3	4	3	3	5	3	82.1019	91.4872	75.3559	99.8713	99.7327	82.4092	303.099	293.304	267.038	341.42	112.573	399.679	270.223	223.453	216.998	303.493	220.175	305.407	675.916	422.405	410.055	603.236	435.432	607.111	659.346	562.192	478.162	628.703	440.841	656.958	521.39
1310	P11413	G6PD	Glucose-6-phosphate 1-dehydrogenase OS=Homo sapiens OX=9606 GN=G6PD PE=1 SV=4					3	3	3	2	1	3	2	1	3	3	2	641.467	606.869	580.433	695.856	91.4155	641.797	506.352	508.54	471.229	499.451	44.9076	544.175	111.436	84.8268	173.187	83.3293	100.185	96.7944	40.3071	45.2447	49.6837	51.9024	61.9159	53.4501	31.9995	32.273	38.7	37.3027	45.6343	34.6721	396.348
1311	P10253	GAA	Lysosomal alpha-glucosidase OS=Homo sapiens OX=9606 GN=GAA PE=1 SV=4					1	0	0	0	0	0	0	0	0	0	0	17.9977	17.5789	20.9954	21.7385	27.8435	17.5524	0	0	0	0	0	0	0	0	0	0	0	0	0	0	0	0	0	0	0	0	0	0	0	0	0
1312	P60520	GABARAPL2	Gamma-aminobutyric acid receptor-associated protein-like 2 OS=Homo sapiens OX=9606 GN=GABARAPL2 PE=1 SV=1					1	0	0	0	0	0	0	0	0	0	0	25.9579	25.8962	26.957	23.5765	32.7933	28.0434	0	0	0	0	0	0	0	0	0	0	0	0	0	0	0	0	0	0	0	0	0	0	0	0	0
1313	Q8TAE8	GADD45GIP1	Growth arrest and DNA damage-inducible proteins-interacting protein 1 OS=Homo sapiens OX=9606 GN=GADD45GIP1 PE=1 SV=1					0	0	3	1	1	2	1	0	0	1	2	0	0	0	0	0	0	0	0	0	0	0	0	174.755	168.085	168.148	193.678	206.641	192.528	9.12529	12.7245	16.1906	13.3949	14.6052	18.1883	70.5207	70.8177	80.0753	67.1089	77.6195	67.2702	285.263
1314	O14976	GAK	Cyclin-G-associated kinase OS=Homo sapiens OX=9606 GN=GAK PE=1 SV=2				Kinase	1	1	1	2	1	3	2	2	3	2	2	23.8758	27.0195	26.8521	32.4971	10.0724	24.5685	53.8953	52.6268	52.5944	58.4691	60.3795	50.0745	25.436	20.6605	19.6067	26.1319	24.4147	21.1798	120.634	104.761	105.048	123.872	126.535	132.996	109.96	94.1102	92.3191	99.5024	109.046	100.312	160.204
1315	Q14376	GALE	UDP-glucose 4-epimerase OS=Homo sapiens OX=9606 GN=GALE PE=1 SV=2					2	4	1	3	2	1	3	2	1	1	2	134.375	130.455	119.619	141.256	18.0761	139.51	222.752	200.774	195.061	233.853	67.351	216.055	31.2709	30.9713	21.8055	28.0539	30.1958	27.0088	231.704	239.171	230.749	293.859	292.193	289.376	254.818	303.419	326.769	367.978	344.128	326.293	269.73
1316	P51570	GALK1	Galactokinase OS=Homo sapiens OX=9606 GN=GALK1 PE=1 SV=1					0	2	4	1	2	2	2	2	1	2	4	0	0	0	0	0	0	61.8491	53.1069	53.1225	65.0432	15.363	62.4081	94.9988	96.9692	92.5393	92.7316	97.1604	100.946	44.1326	39.1602	39.6703	43.9342	48.1153	49.2459	81.3811	76.7472	83.0068	72.1322	82.8565	74.1462	75.6459
1317	Q14435	GALNT3	Polypeptide N-acetylgalactosaminyltransferase 3 OS=Homo sapiens OX=9606 GN=GALNT3 PE=1 SV=2					0	0	1	0	0	0	0	0	0	0	0	0	0	0	0	0	0	0	0	0	0	0	0	139.958	125.032	114.28	147.994	139.094	134.55	0	0	0	0	0	0	0	0	0	0	0	0	0
1318	Q14353	GAMT	Guanidinoacetate N-methyltransferase OS=Homo sapiens OX=9606 GN=GAMT PE=1 SV=1					1	0	0	0	0	0	0	0	0	0	0	30.6611	30.4826	27.8035	31.4509	2.26966	33.5153	0	0	0	0	0	0	0	0	0	0	0	0	0	0	0	0	0	0	0	0	0	0	0	0	0
1319	Q9H2C0	GAN	Gigaxonin OS=Homo sapiens OX=9606 GN=GAN PE=1 SV=1					0	0	0	0	0	1	2	0	0	0	0	0	0	0	0	0	0	0	0	0	0	0	0	0	0	0	0	0	0	0	0	0	0	0	0	0	0	0	0	0	0	72.0921
1320	Q14697	GANAB	Neutral alpha-glucosidase AB OS=Homo sapiens OX=9606 GN=GANAB PE=1 SV=3					5	4	2	4	1	4	5	1	4	1	1	665.586	689.82	648.907	714.619	44.9167	675.919	421.895	391.566	392.194	411.437	239.436	462.576	287.45	270.588	223.372	270.693	269.261	312.953	437.18	418.085	431.998	497.158	441.894	466.28	34.3084	38.9157	42.5488	56.7368	44.1348	49.351	300.949
1321	P04406	GAPDH	Glyceraldehyde-3-phosphate dehydrogenase OS=Homo sapiens OX=9606 GN=GAPDH PE=1 SV=3					7	7	5	5	5	3	2	4	2	2	3	1046.24	1052.07	1000.1	1096.77	933.084	994.03	1004.42	991.767	886.275	952.113	1121.69	1210.94	954.271	896.894	928.838	983.535	1008.65	982.696	933.069	873.939	931.082	1120.64	1032.69	1021.51	750.374	750.16	825.257	821.807	742.234	767.517	506.685
1322	Q14C86	GAPVD1	GTPase-activating protein and VPS9 domain-containing protein 1 OS=Homo sapiens OX=9606 GN=GAPVD1 PE=1 SV=2					0	3	2	2	3	1	2	2	0	3	2	0	0	0	0	0	0	259.866	251.046	257.802	283.512	319.931	275.696	42.368	31.3726	31.6624	35.4692	35.7563	38.9122	30.0848	27.6266	30.2625	29.1925	26.7174	29.7094	58.7229	61.6003	66.5061	67.0347	62.4502	68.9625	100.862
1323	Q9NY12	GAR1	H/ACA ribonucleoprotein complex subunit 1 OS=Homo sapiens OX=9606 GN=GAR1 PE=1 SV=1					0	0	1	2	3	3	3	3	3	2	2	0	0	0	0	0	0	0	0	0	0	0	0	53.3702	50.3848	50.9638	54.3562	48.22	64.7239	243.107	212.759	207.448	160.075	147.133	160.849	226.475	210.046	236.874	172.527	168.461	203.13	291.181
1324	P41250	GARS	Glycine--tRNA ligase OS=Homo sapiens OX=9606 GN=GARS PE=1 SV=3					5	5	2	3	2	1	0	1	0	0	0	254.195	252.744	261.857	272.006	303.256	251.121	521.42	522.088	488.898	466.321	522.824	579.439	160.736	155.776	144.546	145.806	150.048	140.73	196.679	203.557	191.022	195.866	224.626	200.086	100.061	111.895	117.456	100.963	91.6357	84.431	56.9915
1325	P22102	GART	Trifunctional purine biosynthetic protein adenosine-3 OS=Homo sapiens OX=9606 GN=GART PE=1 SV=1					3	4	3	3	3	4	3	2	2	2	2	144.74	140.169	132.52	156.221	597.251	125.989	569.909	541.297	512.847	559.397	127.546	581.119	159.332	154.104	146.989	152.711	138.694	168.183	206.956	204.922	212.022	209.531	194.316	209.27	168.595	160.105	184.469	170.736	161.965	167.685	351.385
1326	Q86YP4	GATAD2A	Transcriptional repressor p66-alpha OS=Homo sapiens OX=9606 GN=GATAD2A PE=1 SV=1					0	4	0	2	3	1	3	1	0	1	0	0	0	0	0	0	0	325.794	330.065	330.435	361.287	449.329	347.692	0	0	0	0	0	0	119.042	99.0028	111.259	106.403	97.6483	92.2489	119.8	122.186	122.177	130.74	105.458	107.045	41.9926
1327	Q8WXI9	GATAD2B	Transcriptional repressor p66-beta OS=Homo sapiens OX=9606 GN=GATAD2B PE=1 SV=1					0	4	0	0	0	0	0	0	0	0	0	0	0	0	0	0	0	290.46	295.493	296.791	331.545	58.2982	337.212	0	0	0	0	0	0	0	0	0	0	0	0	0	0	0	0	0	0	0
1328	O75879	GATB	Glutamyl-tRNA(Gln) amidotransferase subunit B, mitochondrial OS=Homo sapiens OX=9606 GN=GATB PE=1 SV=1					2	0	0	0	0	0	0	0	0	0	0	222.855	219.469	206.958	259.7	256.092	159.632	0	0	0	0	0	0	0	0	0	0	0	0	0	0	0	0	0	0	0	0	0	0	0	0	0
1329	Q8NB37	GATD1	Glutamine amidotransferase-like class 1 domain-containing protein 1 OS=Homo sapiens OX=9606 GN=GATD1 PE=1 SV=1					0	0	0	0	0	1	0	0	0	0	0	0	0	0	0	0	0	0	0	0	0	0	0	0	0	0	0	0	0	0	0	0	0	0	0	0	0	0	0	0	0	199.365
1330	A0A0B4J2D5	GATD3B	Glutamine amidotransferase-like class 1 domain-containing protein 3B, mitochondrial OS=Homo sapiens OX=9606 GN=GATD3B PE=1 SV=1					2	0	0	0	1	0	1	2	0	0	0	41.244	44.4805	43.7972	45.3804	73.216	42.2592	0	0	0	0	0	0	0	0	0	0	0	0	0	0	0	0	0	0	235.13	246.624	279.979	260.38	277.593	240.893	0
1331	P04062	GBA	Lysosomal acid glucosylceramidase OS=Homo sapiens OX=9606 GN=GBA PE=1 SV=3					2	0	0	0	0	0	0	0	0	0	0	68.7524	65.2901	62.1107	75.2969	13.3697	66.835	0	0	0	0	0	0	0	0	0	0	0	0	0	0	0	0	0	0	0	0	0	0	0	0	0
1332	Q04446	GBE1	1,4-alpha-glucan-branching enzyme OS=Homo sapiens OX=9606 GN=GBE1 PE=1 SV=3					2	0	0	0	0	0	0	0	0	0	0	244.271	233.471	248.86	275.377	43.3737	249.852	0	0	0	0	0	0	0	0	0	0	0	0	0	0	0	0	0	0	0	0	0	0	0	0	0
1333	Q92538	GBF1	Golgi-specific brefeldin A-resistance guanine nucleotide exchange factor 1 OS=Homo sapiens OX=9606 GN=GBF1 PE=1 SV=2					4	5	2	2	1	1	1	3	1	2	1	194.679	175.526	185.884	228.082	244.03	172.465	231.734	221.447	221.498	239.438	206.42	228.016	99.1384	100.109	85.579	108.246	104.402	112.333	203.024	252.641	244.133	267.897	289.896	295.112	69.9887	85.2255	98.1545	97.5942	101.996	98.8962	145.179
1334	P28676	GCA	Grancalcin OS=Homo sapiens OX=9606 GN=GCA PE=1 SV=2					1	0	0	0	0	0	0	0	0	0	0	14.8483	15.9523	15.5417	16.3642	11.934	12.3914	0	0	0	0	0	0	0	0	0	0	0	0	0	0	0	0	0	0	0	0	0	0	0	0	0
1335	O75600	GCAT	2-amino-3-ketobutyrate coenzyme A ligase, mitochondrial OS=Homo sapiens OX=9606 GN=GCAT PE=1 SV=1					0	1	2	1	1	2	2	1	0	1	0	0	0	0	0	0	0	162.244	153.56	170.517	163.305	171.92	165.683	50.2327	43.3508	43.4422	51.5849	49.6769	48.8852	30.5685	36.5335	34.6928	42.9135	43.5333	37.5436	59.5415	59.105	58.8023	55.6473	54.5616	51.7813	106.49
1336	Q92947	GCDH	Glutaryl-CoA dehydrogenase, mitochondrial OS=Homo sapiens OX=9606 GN=GCDH PE=1 SV=1					2	0	0	0	0	0	0	0	0	0	0	86.8075	86.2236	82.9736	98.5293	26.7045	85.8594	0	0	0	0	0	0	0	0	0	0	0	0	0	0	0	0	0	0	0	0	0	0	0	0	0
1337	P16383	GCFC2	GC-rich sequence DNA-binding factor 2 OS=Homo sapiens OX=9606 GN=GCFC2 PE=1 SV=2					2	0	0	0	0	0	0	0	0	0	0	66.3756	71.3475	72.3728	76.7808	94.9504	70.2052	0	0	0	0	0	0	0	0	0	0	0	0	0	0	0	0	0	0	0	0	0	0	0	0	0
1338	P48506	GCLC	Glutamate--cysteine ligase catalytic subunit OS=Homo sapiens OX=9606 GN=GCLC PE=1 SV=2					2	0	0	0	0	0	0	0	0	0	0	42.7706	37.3054	30.9578	38.6885	54.4539	35.4275	0	0	0	0	0	0	0	0	0	0	0	0	0	0	0	0	0	0	0	0	0	0	0	0	0
1339	P48507	GCLM	Glutamate--cysteine ligase regulatory subunit OS=Homo sapiens OX=9606 GN=GCLM PE=1 SV=1					2	1	3	2	0	0	0	0	0	0	0	100.405	99.9816	109.457	123.381	99.9992	96.7598	85.6563	81.2877	80.887	88.5887	110.521	88.0293	136.203	128.552	123.22	136.286	125.854	127.858	101.557	104.364	101.412	122.253	109.697	117.575	0	0	0	0	0	0	0
1340	Q92616	GCN1	eIF-2-alpha kinase activator GCN1 OS=Homo sapiens OX=9606 GN=GCN1 PE=1 SV=6					2	5	4	2	5	4	3	4	2	5	5	158.584	159.864	139.454	194.013	82.666	148.758	188.803	163.456	148.081	169.414	92.5765	174.104	114.927	103.942	96.2711	126.359	104.791	114.447	279.19	277.689	297.699	323.09	342.769	329.1	626.658	655.909	706.018	689.159	703.704	667.363	267.815
1341	P23434	GCSH	Glycine cleavage system H protein, mitochondrial OS=Homo sapiens OX=9606 GN=GCSH PE=1 SV=2					2	1	0	0	0	0	0	0	0	0	0	59.1096	57.7172	53.2876	57.0617	78.531	54.1535	41.1481	34.0781	40.9527	41.2329	94.0799	42.3232	0	0	0	0	0	0	0	0	0	0	0	0	0	0	0	0	0	0	0
1342	Q9Y2T3	GDA	Guanine deaminase OS=Homo sapiens OX=9606 GN=GDA PE=1 SV=1					3	1	0	0	0	0	0	0	0	0	0	100.16	112.548	103.488	114.365	34.7645	116.025	97.9234	114.004	95.5827	92.2084	135.426	112.523	0	0	0	0	0	0	0	0	0	0	0	0	0	0	0	0	0	0	0
1343	Q8TB36	GDAP1	Ganglioside-induced differentiation-associated protein 1 OS=Homo sapiens OX=9606 GN=GDAP1 PE=1 SV=3					0	0	0	0	0	0	0	0	0	0	1	0	0	0	0	0	0	0	0	0	0	0	0	0	0	0	0	0	0	0	0	0	0	0	0	0	0	0	0	0	0	0
1344	P31150	GDI1	Rab GDP dissociation inhibitor alpha OS=Homo sapiens OX=9606 GN=GDI1 PE=1 SV=2					4	2	2	1	0	0	0	0	0	0	0	245.658	245.259	243.003	262.104	148.333	243.259	41.9786	48.2687	51.7209	46.2614	48.7267	50.4327	72.7666	75.4154	68.6032	78.6595	75.7507	79.4738	56.2516	56.9385	58.3587	67.7677	58.0059	57.075	0	0	0	0	0	0	0
1345	P50395	GDI2	Rab GDP dissociation inhibitor beta OS=Homo sapiens OX=9606 GN=GDI2 PE=1 SV=2					4	3	3	0	0	1	0	0	0	0	0	283.539	258.615	268.898	294.126	55.234	282.144	170.681	178.097	166.778	178.61	319.313	204.065	450.509	446.554	448.353	493.848	483.788	465.359	0	0	0	0	0	0	0	0	0	0	0	0	39.5901
1346	P57678	GEMIN4	Gem-associated protein 4 OS=Homo sapiens OX=9606 GN=GEMIN4 PE=1 SV=2					0	1	2	2	2	1	4	2	4	4	3	0	0	0	0	0	0	46.4481	45.6027	48.4889	57.2724	20.8163	52.2779	203.24	201.16	160.649	216.984	194.458	195.695	191.499	168.503	183.953	252.832	230.949	203.188	163.851	142.146	176.445	209.311	171.088	201.551	77.4811
1347	Q8TEQ6	GEMIN5	Gem-associated protein 5 OS=Homo sapiens OX=9606 GN=GEMIN5 PE=1 SV=3					3	3	4	3	3	3	3	4	5	4	5	483.402	460.521	464.264	573.176	284.048	463.252	165.256	167.018	171.168	171.042	68.6916	183.779	508.964	472.11	474.311	542.993	516.602	507.567	234.075	254.787	264.22	320.761	322.646	297.899	426.547	483.561	521.565	580.62	562.302	512.946	361.321
1348	Q8WXD5	GEMIN6	Gem-associated protein 6 OS=Homo sapiens OX=9606 GN=GEMIN6 PE=1 SV=1					0	0	0	0	1	0	1	1	2	2	1	0	0	0	0	0	0	0	0	0	0	0	0	0	0	0	0	0	0	0	0	0	0	0	0	194.638	182.131	184.341	270.629	240.916	194.812	0
1349	Q9NWZ8	GEMIN8	Gem-associated protein 8 OS=Homo sapiens OX=9606 GN=GEMIN8 PE=1 SV=1					0	0	0	0	0	0	0	2	1	1	1	0	0	0	0	0	0	0	0	0	0	0	0	0	0	0	0	0	0	0	0	0	0	0	0	0	0	0	0	0	0	0
1350	Q7L5D6	GET4	Golgi to ER traffic protein 4 homolog OS=Homo sapiens OX=9606 GN=GET4 PE=1 SV=1					3	1	2	1	0	0	0	0	0	0	0	315.553	334.927	313.845	388.525	330.824	299.588	99.9033	78.8297	82.8061	86.5545	109.058	87.7704	321.402	285.628	268.379	293.121	219.295	331.72	58.405	57.845	57.5642	67.2315	50.9985	82.92	0	0	0	0	0	0	0
1351	Q96RP9	GFM1	Elongation factor G, mitochondrial OS=Homo sapiens OX=9606 GN=GFM1 PE=1 SV=2					3	1	3	4	3	5	0	2	1	0	2	199.785	201.244	189.385	227.675	122.673	193.63	35.9127	38.0743	35.2348	35.738	42.9887	35.792	312.018	294.236	293.998	352.191	328.561	304.854	167.385	149.951	153.448	166.493	163.501	162.792	220.627	233.939	258.216	246.069	243.23	240.324	449.998
1352	Q969S9	GFM2	Ribosome-releasing factor 2, mitochondrial OS=Homo sapiens OX=9606 GN=GFM2 PE=1 SV=1					0	1	0	0	0	0	0	0	0	0	0	0	0	0	0	0	0	29.5931	29.6488	30.7101	35.016	43.7941	31.1965	0	0	0	0	0	0	0	0	0	0	0	0	0	0	0	0	0	0	0
1353	Q06210	GFPT1	Glutamine--fructose-6-phosphate aminotransferase [isomerizing] 1 OS=Homo sapiens OX=9606 GN=GFPT1 PE=1 SV=3					3	4	3	2	3	3	4	2	2	2	1	247.913	228.184	244.892	276.627	375.398	213.9	780.325	688.54	608.523	749.024	612.161	829.284	285.168	272.122	246.463	286.045	241.592	251.137	124.108	113.028	111.782	130.725	113.83	119.136	172.934	181.16	182.926	179.73	170.758	175.856	169.293
1354	Q9UJY5	GGA1	ADP-ribosylation factor-binding protein GGA1 OS=Homo sapiens OX=9606 GN=GGA1 PE=1 SV=1					2	0	0	0	0	0	0	0	0	0	0	37.6178	36.9036	29.7622	42.1642	19.9874	40.1017	0	0	0	0	0	0	0	0	0	0	0	0	0	0	0	0	0	0	0	0	0	0	0	0	0
1355	O75223	GGCT	Gamma-glutamylcyclotransferase OS=Homo sapiens OX=9606 GN=GGCT PE=1 SV=1					1	1	0	0	0	0	0	0	0	0	0	29.4739	26.9207	27.5463	28.9588	38.7889	31.5318	28.5765	31.6132	33.1863	30.9845	45.8139	37.2573	0	0	0	0	0	0	0	0	0	0	0	0	0	0	0	0	0	0	0
1356	Q92820	GGH	Gamma-glutamyl hydrolase OS=Homo sapiens OX=9606 GN=GGH PE=1 SV=2					1	0	0	0	0	0	0	0	0	0	0	16.9777	17.5266	16.5235	18.4438	5.11392	19.0894	0	0	0	0	0	0	0	0	0	0	0	0	0	0	0	0	0	0	0	0	0	0	0	0	0
1357	Q9NWU2	GID8	Glucose-induced degradation protein 8 homolog OS=Homo sapiens OX=9606 GN=GID8 PE=1 SV=1					1	0	1	2	1	0	1	2	0	2	1	25.5346	36.3291	28.597	30.2005	36.2771	33.3673	0	0	0	0	0	0	40.7541	44.627	45.8445	64.7251	54.281	56.2381	264.458	240.84	277.716	292.932	303.98	296.303	15.9634	19.0167	18.1471	18.3924	22.4225	17.0589	0
1358	Q6Y7W6	GIGYF2	GRB10-interacting GYF protein 2 OS=Homo sapiens OX=9606 GN=GIGYF2 PE=1 SV=1					2	4	4	1	1	1	2	1	2	3	4	83.4394	84.7412	78.5044	78.1867	105.82	74.5934	188.13	175.96	174.609	185.357	124.597	187.012	134.886	130.328	132.2	151.954	146.032	155.006	31.4353	30.4585	36.7271	34.14	42.111	39.9049	31.9796	33.3259	39.6518	30.5733	40.6983	40.537	20.1578
1359	Q9Y248	GINS2	DNA replication complex GINS protein PSF2 OS=Homo sapiens OX=9606 GN=GINS2 PE=1 SV=1					1	0	0	0	0	0	0	0	0	0	0	12.9821	16.4082	14.6478	17.2421	20.2125	12.2416	0	0	0	0	0	0	0	0	0	0	0	0	0	0	0	0	0	0	0	0	0	0	0	0	0
1360	Q9BRT9	GINS4	DNA replication complex GINS protein SLD5 OS=Homo sapiens OX=9606 GN=GINS4 PE=1 SV=1					2	0	0	0	0	0	0	0	0	0	0	286.618	289.106	287.421	328.821	395.415	269.507	0	0	0	0	0	0	0	0	0	0	0	0	0	0	0	0	0	0	0	0	0	0	0	0	0
1361	O14908	GIPC1	PDZ domain-containing protein GIPC1 OS=Homo sapiens OX=9606 GN=GIPC1 PE=1 SV=2					2	0	0	0	0	0	0	0	0	0	0	33.9803	35.3925	31.953	32.5545	0	37.9456	0	0	0	0	0	0	0	0	0	0	0	0	0	0	0	0	0	0	0	0	0	0	0	0	0
1362	Q9Y2X7	GIT1	ARF GTPase-activating protein GIT1 OS=Homo sapiens OX=9606 GN=GIT1 PE=1 SV=2					0	3	2	3	4	3	2	4	0	0	0	0	0	0	0	0	0	76.8082	65.2175	66.8322	78.2245	22.236	68.9278	262.876	245.015	210.31	267.172	211.509	274.784	271.371	254.553	262.608	361.789	296.873	347.434	241.68	225.312	244.65	285.49	265.434	293.782	336.25
1363	P16278	GLB1	Beta-galactosidase OS=Homo sapiens OX=9606 GN=GLB1 PE=1 SV=2					0	1	1	0	0	0	0	0	0	0	0	0	0	0	0	0	0	83.0424	80.5467	82.8525	82.9258	163.454	72.6192	61.45	49.6455	38.8578	52.1933	49.3139	50.2468	0	0	0	0	0	0	0	0	0	0	0	0	0
1364	Q8IW92	GLB1L2	Beta-galactosidase-1-like protein 2 OS=Homo sapiens OX=9606 GN=GLB1L2 PE=2 SV=1					0	0	0	0	0	0	0	1	0	0	0	0	0	0	0	0	0	0	0	0	0	0	0	0	0	0	0	0	0	0	0	0	0	0	0	0	0	0	0	0	0	0
1365	Q53GS7	GLE1	Nucleoporin GLE1 OS=Homo sapiens OX=9606 GN=GLE1 PE=1 SV=2					0	0	0	0	0	1	0	1	0	1	0	0	0	0	0	0	0	0	0	0	0	0	0	0	0	0	0	0	0	0	0	0	0	0	0	0	0	0	0	0	0	523.373
1366	Q92896	GLG1	Golgi apparatus protein 1 OS=Homo sapiens OX=9606 GN=GLG1 PE=1 SV=2					1	1	2	0	1	0	0	0	0	0	1	16.977	17.8992	14.8221	15.8441	0	10.9309	41.4207	36.6583	39.8141	41.9913	48.6634	42.4864	79.9399	64.4835	51.9506	90.3957	69.9059	83.6721	0	0	0	0	0	0	35.1556	25.3735	20.8772	29.3014	23.8706	32.8762	0
1367	Q92990	GLMN	Glomulin OS=Homo sapiens OX=9606 GN=GLMN PE=1 SV=2					0	1	0	0	0	0	0	0	0	0	0	0	0	0	0	0	0	46.1815	50.851	43.3225	50.1339	71.1013	53.8934	0	0	0	0	0	0	0	0	0	0	0	0	0	0	0	0	0	0	0
1368	Q04760	GLO1	Lactoylglutathione lyase OS=Homo sapiens OX=9606 GN=GLO1 PE=1 SV=4					4	3	2	1	0	0	0	0	0	0	0	154.334	189.903	182.931	189.532	169.193	178.04	239.36	251.024	246.104	236.908	334.399	272.202	110.963	108.761	107.495	116.589	133.14	128.871	99.3457	98.6216	100.878	104.486	111.451	121.163	0	0	0	0	0	0	0
1369	Q9HC38	GLOD4	Glyoxalase domain-containing protein 4 OS=Homo sapiens OX=9606 GN=GLOD4 PE=1 SV=1					4	1	3	0	0	0	0	0	0	0	0	942.491	928.552	898.629	989.519	343.752	954.457	39.9598	47.2497	40.6055	51.2314	25.3824	46.7112	372.536	362.274	345.198	386.436	425.441	383.921	0	0	0	0	0	0	0	0	0	0	0	0	0
1370	P35754	GLRX	Glutaredoxin-1 OS=Homo sapiens OX=9606 GN=GLRX PE=1 SV=2					1	0	0	0	0	0	0	0	0	0	0	51.0699	56.426	58.4964	61.9877	72.1756	60.0987	0	0	0	0	0	0	0	0	0	0	0	0	0	0	0	0	0	0	0	0	0	0	0	0	0
1371	O76003	GLRX3	Glutaredoxin-3 OS=Homo sapiens OX=9606 GN=GLRX3 PE=1 SV=2					4	4	3	2	2	2	3	2	2	2	2	366.064	364.701	361.001	397.066	405.101	358.995	300.991	291.937	279.258	305.843	346.203	317.101	106.149	91.9254	94.5889	110.693	101.405	106.338	77.5862	81.3093	77.6013	94.4897	87.6704	94.6361	191.458	202.119	214.012	202.032	221.864	221.453	322.668
1372	Q86SX6	GLRX5	Glutaredoxin-related protein 5, mitochondrial OS=Homo sapiens OX=9606 GN=GLRX5 PE=1 SV=2					0	1	0	0	0	0	0	0	0	0	0	0	0	0	0	0	0	26.2127	24.9333	23.6941	29.7843	6.34386	27.4533	0	0	0	0	0	0	0	0	0	0	0	0	0	0	0	0	0	0	0
1373	O94925	GLS	Glutaminase kidney isoform, mitochondrial OS=Homo sapiens OX=9606 GN=GLS PE=1 SV=1					2	2	2	3	3	2	2	1	0	1	0	240.849	240.264	232.342	271.6	403.147	206.203	184.519	184.949	187.564	207.417	244.257	186.953	69.8811	62.4776	66.8357	72.7375	64.6238	66.8453	141.196	134.499	143.678	160.646	177.145	156.711	348.782	362.394	399.896	418.41	432.268	406.972	211.362
1374	P00367	GLUD1	Glutamate dehydrogenase 1, mitochondrial OS=Homo sapiens OX=9606 GN=GLUD1 PE=1 SV=2					2	5	3	1	1	0	0	0	1	1	0	81.4219	83.272	95.4294	108.765	66.2126	78.9661	726.806	716.831	634.903	683.415	572.942	794.339	176.507	152.633	150.039	167.592	162.528	167.264	24.6483	29.5051	25.9874	25.8008	24.818	23.6012	24.8083	28.4857	26.5838	33.4278	26.5963	22.7192	0
1375	Q49A26	GLYR1	Putative oxidoreductase GLYR1 OS=Homo sapiens OX=9606 GN=GLYR1 PE=1 SV=4					0	0	0	0	0	1	0	0	0	0	0	0	0	0	0	0	0	0	0	0	0	0	0	0	0	0	0	0	0	0	0	0	0	0	0	0	0	0	0	0	0	57.2534
1376	P17900	GM2A	Ganglioside GM2 activator OS=Homo sapiens OX=9606 GN=GM2A PE=1 SV=4					1	0	0	0	0	0	0	0	0	0	0	36.2552	41.6975	30.0474	37.8391	41.986	36.5632	0	0	0	0	0	0	0	0	0	0	0	0	0	0	0	0	0	0	0	0	0	0	0	0	0
1377	Q9Y692	GMEB1	Glucocorticoid modulatory element-binding protein 1 OS=Homo sapiens OX=9606 GN=GMEB1 PE=1 SV=2					0	0	1	0	0	0	0	0	0	0	0	0	0	0	0	0	0	0	0	0	0	0	0	20.0676	20.8046	16.7723	20.3551	21.4174	19.5254	0	0	0	0	0	0	0	0	0	0	0	0	0
1378	Q9UKD1	GMEB2	Glucocorticoid modulatory element-binding protein 2 OS=Homo sapiens OX=9606 GN=GMEB2 PE=1 SV=1					0	0	1	0	0	0	0	0	0	0	0	0	0	0	0	0	0	0	0	0	0	0	0	21.9635	19.2614	20.6693	23.3648	25.4784	24.1755	0	0	0	0	0	0	0	0	0	0	0	0	0
1379	P60983	GMFB	Glia maturation factor beta OS=Homo sapiens OX=9606 GN=GMFB PE=1 SV=2					2	3	1	1	1	1	0	1	1	0	1	96.4348	113.157	109.578	105.116	20.4649	106.082	185.983	189.97	171.753	202.262	135.32	217.436	20.0761	26.773	20.7666	20.1665	21.3552	21.5173	14.2868	14.8289	15.5016	14.8515	16.1929	17.5994	72.0669	85.1193	87.6965	77.3837	81.9824	83.1339	61.4218
1380	Q96IJ6	GMPPA	Mannose-1-phosphate guanyltransferase alpha OS=Homo sapiens OX=9606 GN=GMPPA PE=1 SV=1					0	1	2	1	0	0	0	1	1	0	1	0	0	0	0	0	0	51.4891	43.4272	37.1184	47.8137	4.67144	41.29	113.843	107.04	83.896	101.822	83.4757	89.9393	108.043	110.551	105.452	102.884	105.049	95.9513	0	0	0	0	0	0	0
1381	Q9Y5P6	GMPPB	Mannose-1-phosphate guanyltransferase beta OS=Homo sapiens OX=9606 GN=GMPPB PE=1 SV=2					0	2	0	0	0	0	0	0	0	0	0	0	0	0	0	0	0	76.3965	64.4268	72.2237	72.0207	88.2098	77.7218	0	0	0	0	0	0	0	0	0	0	0	0	0	0	0	0	0	0	0
1382	P36959	GMPR	GMP reductase 1 OS=Homo sapiens OX=9606 GN=GMPR PE=1 SV=1					0	0	0	0	1	0	0	1	0	0	0	0	0	0	0	0	0	0	0	0	0	0	0	0	0	0	0	0	0	0	0	0	0	0	0	54.5282	54.0042	54.7482	55.5247	62.7924	65.1369	0
1383	Q9P2T1	GMPR2	GMP reductase 2 OS=Homo sapiens OX=9606 GN=GMPR2 PE=1 SV=1					1	0	0	0	0	0	0	0	0	0	0	168.414	158.565	178.479	227.507	277.486	179.693	0	0	0	0	0	0	0	0	0	0	0	0	0	0	0	0	0	0	0	0	0	0	0	0	0
1384	P49915	GMPS	GMP synthase [glutamine-hydrolyzing] OS=Homo sapiens OX=9606 GN=GMPS PE=1 SV=1					4	3	4	4	5	3	3	4	5	2	2	106.806	103.345	110.778	130.208	132.779	101.434	482.232	435.112	466.31	565.753	752.434	500.097	646.136	585.859	652.272	723.966	675.78	673.565	290.337	269.611	317.711	345.476	366.7	334.673	605.638	601.788	737.874	728.992	733.432	669.747	453.427
1385	P29992	GNA11	Guanine nucleotide-binding protein subunit alpha-11 OS=Homo sapiens OX=9606 GN=GNA11 PE=1 SV=2					1	0	1	0	0	0	0	0	0	0	0	52.1362	53.0087	64.8301	59.9585	55.3462	55.1097	0	0	0	0	0	0	65.4698	78.3926	63.4748	87.2917	74.8702	86.4638	0	0	0	0	0	0	0	0	0	0	0	0	0
1386	Q14344	GNA13	Guanine nucleotide-binding protein subunit alpha-13 OS=Homo sapiens OX=9606 GN=GNA13 PE=1 SV=2					1	0	0	0	0	0	0	0	0	0	0	15.2891	14.2887	15.9323	15.6642	4.3531	15.3742	0	0	0	0	0	0	0	0	0	0	0	0	0	0	0	0	0	0	0	0	0	0	0	0	0
1387	P63096	GNAI1	Guanine nucleotide-binding protein G(i) subunit alpha-1 OS=Homo sapiens OX=9606 GN=GNAI1 PE=1 SV=2					1	1	2	2	2	1	1	0	0	0	0	16.8792	16.8734	16.609	20.0328	0	17.3269	44.0534	38.5576	36.8326	35.4658	0	37.9355	78.886	81.7708	83.4718	85.7129	83.8077	69.3962	58.2408	62.4697	60.1622	69.0309	70.2225	71.5588	44.9218	63.3508	67.5354	70.085	75.8531	83.0904	18.8702
1388	P04899	GNAI2	Guanine nucleotide-binding protein G(i) subunit alpha-2 OS=Homo sapiens OX=9606 GN=GNAI2 PE=1 SV=3					1	3	2	4	0	0	0	0	1	0	1	17.62	26.2196	22.9697	27.3521	0	23.4215	118.045	138.999	123.809	132.561	91.6458	136.718	36.5756	38.4442	35.1331	38.0944	45.7226	43.9264	105.02	113.402	109.51	123.302	135.129	192.477	0	0	0	0	0	0	0
1389	P08754	GNAI3	Guanine nucleotide-binding protein G(k) subunit alpha OS=Homo sapiens OX=9606 GN=GNAI3 PE=1 SV=3					0	2	2	1	0	1	2	0	0	0	0	0	0	0	0	0	0	43.6226	49.4676	46.5359	55.6186	3.08721	56.26	74.5596	85.0969	78.0473	94.2719	76.0426	70.322	72.7955	94.3582	88.1949	108.924	117.931	118.802	0	0	0	0	0	0	32.6532
1390	Q5JWF2	GNAS	Guanine nucleotide-binding protein G(s) subunit alpha isoforms XLas OS=Homo sapiens OX=9606 GN=GNAS PE=1 SV=2					3	0	1	2	1	0	1	2	1	1	0	173.683	187.192	183.077	203.117	101.824	170.906	0	0	0	0	0	0	117.546	132.782	129.436	129.167	117.45	115.237	175.119	177.575	176.247	168.886	184.142	203.645	87.0074	109.2	123.267	111.444	128.475	136.837	0
1391	P62873	GNB1	Guanine nucleotide-binding protein G(I)/G(S)/G(T) subunit beta-1 OS=Homo sapiens OX=9606 GN=GNB1 PE=1 SV=3					2	3	3	2	2	3	2	2	2	2	2	176.803	200.656	196.674	207.005	37.6625	159.424	159.921	163.808	160.494	158.379	61.8869	146.708	376.741	403.312	378.589	442.681	380.836	389.196	213.473	267.195	261.804	307.785	303.974	326.693	167.506	194.754	220.409	238.008	222.73	247.14	297.659
1392	P62879	GNB2	Guanine nucleotide-binding protein G(I)/G(S)/G(T) subunit beta-2 OS=Homo sapiens OX=9606 GN=GNB2 PE=1 SV=3					0	0	0	0	0	0	1	1	1	0	0	0	0	0	0	0	0	0	0	0	0	0	0	0	0	0	0	0	0	0	0	0	0	0	0	0	0	0	0	0	0	0
[truncated: 2,896 more rows]
[truncated: 145 more columns]
