# Supplementary material for: EDF1 coordinates cellular responses to ribosome collisions
Source: eLife. 2020 Aug 3;9:e58828. doi: 10.7554/eLife.58828 (PMC7486125; doi:10.7554/eLife.58828)
Supplement: Figure 2—figure supplement 2—source data 1. [file elife-58828-fig2-figsupp2-data1.xlsx]

## Sheet: Fig2-source-data-2
Sinha N. et al. (2020)
Figure 2-source data 2: Related to Figure 2-figure supplement 2A

## Sheet: Sheet2
Ubiquitin remnant profiling of HEK293T cells treated with 0 µM emetine (UT) or 1.8 µM emetine (EL) for 15 min. Searched with Andromeda; analyzed with Maxquant (1.6.7.0) and Perseus (1.6.7.0)
Related to Figure 2-figure supplement 2A
Rank	Gene symbol	Protein Names	Protein IDs	Sequence	Length	Mass	PEP	Score	Intensity	MS/MS Count	Log2(Intensity UT1)	Log2(Intensity UT2)	Log2(Intensity UT3)	Log2(Intensity EL1)	Log2(Intensity EL2)	Log2(Intensity EL3)	- Log10 Student's T-test p-value EL_UT	Student's T-test q-value EL_UT	Log2(EL/UT)	Student's T-test Test statistic EL_UT
1	AAAS	Aladin	Q9NRG9	GGGVTNLLWSPDGSKILATTPSAVFR	26	2757.44	0.00045316	80.293	7090100	1	20.6306	21.45	19.5052	19.0482	19.0121	19.5859	1.0393	1	-1.31319	-0.732208
2	AAAS	Aladin	Q9NRG9	IAHIPLYFVNAQFPR	15	1784.97	0.0010176	89.189	4506100	1	19.659	20.9249	18.5428	18.6513	17.8386	19.7696	0.466099	1	-0.955765	-0.457958
3	AAR2	Protein AAR2 homolog	Q9Y312	MGFFLSLHQR	10	1234.63	0.0058161	75.294	21822000	8	21.33	22.4731	21.8563	21.4806	21.2075	22.0086	0.325139	1	-0.320869	-0.199863
4	AARS	Alanine--tRNA ligase, cytoplasmic	P49588	RPIMSNHTATHILNFALR	18	2091.12	3.038e-08	125.5	9255600	2	19.9385	21.3124	20.7556	20.0117	19.6737	20.919	0.356768	1	-0.467355	-0.267769
5	AASDHPPT	L-aminoadipate-semialdehyde dehydrogenase-phosphopantetheinyl transferase	Q9NRN7	AIGVGLGFELQR	12	1258.7	5.403e-06	121.73	9629400	2	19.7167	21.1656	20.2664	20.3427	20.0274	21.3941	0.127333	1	0.205186	0.114577
6	AASS	Alpha-aminoadipic semialdehyde synthase, mitochondrial;Lysine ketoglutarate reductase;Saccharopine dehydrogenase	Q9UDR5	VVAFGQWAGVAGMINILHGMGLR	23	2396.26	2.2404e-09	133.47	82890000	16	23.5425	24.4005	22.2976	23.0009	23.5369	24.4428	0.121448	1	0.246696	0.127068
7	ABCB7	ATP-binding cassette sub-family B member 7, mitochondrial	O75027	NVFLHLHNLDLGFHLSR	17	2031.08	1.8911e-05	104.93	27013000	6	21.2868	22.8944	22.2897	20.3707	22.6313	21.8109	0.27363	1	-0.552664	-0.274943
8	ABCD3	ATP-binding cassette sub-family D member 3	P28288	LFYVPQRPYMTLGTLR	16	1954.05	0.078003	45.614	11255000	1	21.0167	21.9439	19.5353	20.6187	20.0685	20.6359	0.208501	1	-0.390891	-0.202983
9	ABCE1	ATP-binding cassette sub-family E member 1	P61221	FLSQLEITFR	10	1252.68	1.0936e-06	169.09	43934000	8	22.1052	23.6461	22.9153	22.0811	22.5718	22.8788	0.307136	1	-0.378311	-0.222274
10	ABHD14B	Alpha/beta hydrolase domain-containing protein 14B	Q96IU4	FSVLLLHGIR	10	1153.7	0.0029214	85.676	18216000	7	21.1323	22.4541	21.5203	21.0385	20.8862	21.5507	0.545373	1	-0.543744	-0.331399
11	ACAD11	Acyl-CoA dehydrogenase family member 11	Q709F0	IIRPLSVFGYTDNFHGGHFEIHFNQVR	27	3199.61	2.0431e-14	148.87	8472600	2	19.0947	21.1844	18.4305	19.6324	21.63	20.0927	0.357898	1	0.88184	0.396109
12	ACADM	Medium-chain specific acyl-CoA dehydrogenase, mitochondrial	P11310	ANWYFLLAR	9	1152.61	6.5922e-06	163.34	51540000	7	22.7807	24.2638	21.7351	22.083	22.327	23.3905	0.144966	1	-0.326388	-0.160291
13	ACAT2	Acetyl-CoA acetyltransferase, cytosolic	Q9BWD1	ILVTLLHTLER	11	1306.8	2.7987e-10	178.22	41556000	4	21.9477	23.9875	22.8188	22.141	21.6319	22.4186	0.603271	1	-0.854151	-0.465674
14	ACLY	ATP-citrate synthase	P53396	DLVSSLTSGLLTIGDR	16	1645.89	1.2629e-11	156.69	13559000	3	19.7611	22.2957	19.9503	21.2589	19.787	21.5614	0.0713135	1	0.200041	0.0916661
15	ACOT7	Cytosolic acyl coenzyme A thioester hydrolase	O00154	AASAFFTYVSLSQEGR	16	1732.84	6.0619e-12	166.04	15385000	2	20.2648	22.981	19.9418	19.9295	19.9895	21.4166	0.223295	1	-0.617274	-0.270809
16	ACP1	Low molecular weight phosphotyrosine protein phosphatase	P24666	SVLFVCLGNICR	12	1436.73	0.012752	63.816	6925600	0	19.7139	20.8534	20.2635	19.7665	19.726	20.1375	0.49282	1	-0.400286	-0.257565
17	ACTG1;ACTB	Actin, cytoplasmic 2;Actin, cytoplasmic 2, N-terminally processed;Actin, cytoplasmic 1;Actin, cytoplasmic 1, N-terminally processed	P63261;P60709	DLYANTVLSGGTTMYPGIADR	21	2214.06	3.0459e-26	210.37	98442000	12	22.8975	25.3679	23.0551	23.7602	22.6379	24.0916	0.109893	1	-0.276942	-0.13115
18	ACTG1;ACTB	Actin, cytoplasmic 2;Actin, cytoplasmic 2, N-terminally processed;Actin, cytoplasmic 1;Actin, cytoplasmic 1, N-terminally processed	P63261;P60709	GYSFTTTAER	10	1131.52	0.00029391	114.89	7707500	2	18.9895	20.8181	19.9962	20.6773	18.9791	21.0013	0.127225	1	0.284648	0.140897
19	ACTG1;ACTB	Actin, cytoplasmic 2;Actin, cytoplasmic 2, N-terminally processed;Actin, cytoplasmic 1;Actin, cytoplasmic 1, N-terminally processed	P63261;P60709	TTGIVMDSGDGVTHTVPIYEGYALPHAILR	30	3182.61	8.0685e-15	148.85	80200000	12	22.3337	25.1254	22.0696	23.9308	22.4205	23.553	0.0394823	1	0.125228	0.0549789
20	ACTG1;ACTB;POTEE;POTEF;ACTA1;ACTC1;POTEI;ACTG2;ACTA2	Actin, cytoplasmic 2;Actin, cytoplasmic 2, N-terminally processed;Actin, cytoplasmic 1;Actin, cytoplasmic 1, N-terminally processed;POTE ankyrin domain family member E;POTE ankyrin domain family member F;Actin, alpha skeletal muscle;Actin, alpha cardiac muscle 1;POTE ankyrin domain family member I;Actin, gamma-enteric smooth muscle;Actin, aortic smooth muscle	P63261;P60709;Q6S8J3;A5A3E0;P68133;P68032;P0CG38;P63267;P62736	AVFPSIVGR	9	944.544	0.00090723	100.45	7643600	3	18.7876	19.8847	20.27	20.6585	17.7389	21.6556	0.106306	1	0.370234	0.15073
21	ACTG1;ACTB;POTEE;POTEF;ACTA1;ACTC1;POTEI;ACTG2;ACTA2	Actin, cytoplasmic 2;Actin, cytoplasmic 2, N-terminally processed;Actin, cytoplasmic 1;Actin, cytoplasmic 1, N-terminally processed;POTE ankyrin domain family member E;POTE ankyrin domain family member F;Actin, alpha skeletal muscle;Actin, alpha cardiac muscle 1;POTE ankyrin domain family member I;Actin, gamma-enteric smooth muscle;Actin, aortic smooth muscle	P63261;P60709;Q6S8J3;A5A3E0;P68133;P68032;P0CG38;P63267;P62736	AVFPSIVGRPR	11	1197.7	1.3207e-05	123.63	15231000	6	18.8706	22.1179	20.1837	22.2376	20.3002	21.6329	0.380711	1	0.999439	0.433942
22	ACTG1;ACTB;POTEE;POTEF;ACTA1;ACTC1;POTEI;POTEKP;POTEJ	Actin, cytoplasmic 2;Actin, cytoplasmic 2, N-terminally processed;Actin, cytoplasmic 1;Actin, cytoplasmic 1, N-terminally processed;POTE ankyrin domain family member E;POTE ankyrin domain family member F;Actin, alpha skeletal muscle;Actin, alpha cardiac muscle 1;POTE ankyrin domain family member I;Putative beta-actin-like protein 3;Putative beta-actin-like protein 3, N-terminally processed;POTE a…	P63261;P60709;Q6S8J3;A5A3E0;P68133;P68032;P0CG38;Q9BYX7;P0CG39	IWHHTFYNELR	11	1514.74	1.6951e-10	176.95	601880000	30	26.8236	26.2458	26.7734	26.0964	26.4986	26.8655	0.166252	1	-0.127451	-0.0855981
23	ACTG1;ACTB;POTEE;POTEF;ACTA1;ACTC1;POTEKP;ACTG2;ACTA2;ACTBL2	Actin, cytoplasmic 2;Actin, cytoplasmic 2, N-terminally processed;Actin, cytoplasmic 1;Actin, cytoplasmic 1, N-terminally processed;POTE ankyrin domain family member E;POTE ankyrin domain family member F;Actin, alpha skeletal muscle;Actin, alpha cardiac muscle 1;Putative beta-actin-like protein 3;Putative beta-actin-like protein 3, N-terminally processed;Actin, gamma-enteric smooth muscle;Actin, …	P63261;P60709;Q6S8J3;A5A3E0;P68133;P68032;Q9BYX7;P63267;P62736;Q562R1	SYELPDGQVITIGNER	16	1789.88	1.6113e-07	123.64	12994000	3	19.2325	21.8704	19.9679	21.8858	17.3815	21.7967	0.000431319	1	-0.00222588	-0.000772402
24	ACTG1;ACTB;POTEE;POTEF;POTEI;POTEKP;POTEJ	Actin, cytoplasmic 2;Actin, cytoplasmic 2, N-terminally processed;Actin, cytoplasmic 1;Actin, cytoplasmic 1, N-terminally processed;POTE ankyrin domain family member E;POTE ankyrin domain family member F;POTE ankyrin domain family member I;Putative beta-actin-like protein 3;Putative beta-actin-like protein 3, N-terminally processed;POTE ankyrin domain family member J	P63261;P60709;Q6S8J3;A5A3E0;P0CG38;Q9BYX7;P0CG39	QEYDESGPSIVHR	13	1515.7	0.0011493	89.189	5501200	1	17.4854	20.0676	18.8591	20.5265	16.8657	21.0111	0.166062	1	0.663695	0.245249
25	ACTN4	Alpha-actinin-4	O43707	IMSLVDPNHSGLVTFQAFIDFMSR	24	2724.34	1.4534e-09	136.56	19999000	2	21.3214	22.6199	18.2507	21.3736	21.6737	22.1204	0.3079	1	0.991924	0.394648
26	ACTR10	Actin-related protein 10	Q9NZ32	EFIHILYFR	9	1236.67	0.060449	40.882	5145800	1	19.2041	21.7949	18.7944	18.0978	18.7757	18.8013	0.640595	1	-1.37287	-0.633485
27	ADAR	Double-stranded RNA-specific adenosine deaminase	P55265	SVTLGYLFSQGHLTR	15	1677.88	1.1265e-05	115.82	11015000	2	20.4961	22.1283	19.842	19.541	19.6794	21.2004	0.324529	1	-0.681875	-0.330525
28	ADD1	Alpha-adducin	P35611	LADLFGWSQLIYNHITTR	18	2147.12	2.4778e-12	155.03	374300000	6	25.7064	26.6935	24.5613	24.7262	25.4225	26.7585	0.00690298	1	-0.0180283	-0.00876276
29	ADD3	Gamma-adducin	Q9UEY8	LVDLFGWAHLANTYISVR	18	2074.1	1.3472e-08	137.14	44823000	6	22.3016	23.8617	21.3751	22.4832	23.0577	22.7585	0.124703	1	0.253646	0.130457
30	ADH5	Alcohol dehydrogenase class-3	P11766	GWGVSVVVGVAASGEEIATRPFQLVTGR	28	2841.51	7.4109e-15	166.89	20723000	5	21.9887	22.3186	18.6231	22.0544	21.0681	22.0603	0.241591	1	0.750816	0.309501
31	ADPGK	ADP-dependent glucokinase	Q9BRR6	IHFHTLVYHILATVDGHWANQLAAVAAGAR	30	3251.71	1.0656e-94	354.58	207380000	16	25.1856	25.4331	24.4084	25.1477	24.8107	25.0629	0.00196523	1	-0.00195567	-0.00128252
32	ADSL	Adenylosuccinate lyase	P30566	HLMTLVMDPLQTASVQWFER	20	2401.19	1.1752e-09	142.26	5453300	1	17.9438	22.0526	19.699	17.9789	17.0797	17.2217	0.945878	1	-2.47172	-1.02029
33	ADSL	Adenylosuccinate lyase	P30566	IQVDAYFSPIHSQLDHLLDPSSFTGR	26	2942.46	3.9358e-06	95.819	20116000	6	21.126	22.8921	20.2065	21.4509	21.5821	21.431	0.0341645	1	0.0797997	0.0401116
34	AGL	Glycogen debranching enzyme;4-alpha-glucanotransferase;Amylo-alpha-1,6-glucosidase	P35573	GFNYHQGPEWLWPIGYFLR	19	2379.16	4.4575e-06	101.9	27176000	9	21.78	22.9094	19.6921	21.7176	22.1735	22.6695	0.300663	1	0.726364	0.332938
35	AHSA1	Activator of 90 kDa heat shock protein ATPase homolog 1	O95433	VFTTQELVQAFTHAPATLEADR	22	2444.23	1.0133e-13	155.93	5891100	1	17.7383	21.4265	18.3997	20.011	17.8344	20.469	0.0621613	1	0.249924	0.096264
36	AIFM1	Apoptosis-inducing factor 1, mitochondrial	O95831	APSHVPFLLIGGGTAAFAAAR	21	2023.1	0.00017078	89.859	12207000	1	20.6471	22.4379	19.1597	20.1724	20.6338	20.5053	0.118285	1	-0.311069	-0.144174
37	AIFM1	Apoptosis-inducing factor 1, mitochondrial	O95831	GVIFYLR	7	866.501	0.0013759	98.03	4542400	1	19.6875	20.7291	20.1499	19.6032	18.072	19.0045	1.13287	1	-1.29558	-0.745516
38	AIFM1	Apoptosis-inducing factor 1, mitochondrial	O95831	VVVGIVLWNIFNR	13	1527.89	2.2412e-13	182.53	16465000	2	21.3064	22.5723	20.139	19.4486	21.5284	21.3862	0.22142	1	-0.551473	-0.253967
39	AKAP12	A-kinase anchor protein 12	Q02952	FFTQGWAGWR	10	1254.59	1.2091e-09	191.63	59363000	11	23.327	23.9999	22.4591	22.6313	22.9705	23.4655	0.179477	1	-0.239568	-0.140303
40	ALDH16A1	Aldehyde dehydrogenase family 16 member A1	Q8IZ83	LGQALELGYGLQVGTVWINAHGLR	24	2564.39	3.2369e-06	109.08	4920000	1	19.3448	21.4087	17.8781	18.6083	19.2185	18.813	0.25352	1	-0.663931	-0.296446
41	ALDOA	Fructose-bisphosphate aldolase A	P04075	FSHEEIAMATVTALR	15	1674.84	6.8626e-08	132.97	20946000	5	19.5298	22.9925	21.1656	20.9922	17.8801	22.7725	0.144981	1	-0.68106	-0.231279
42	ALDOA	Fructose-bisphosphate aldolase A	P04075	GVVPLAGTNGETTTQGLDGLSER	23	2271.13	0.00064859	73.405	9390700	2	18.6767	20.8224	19.3038	21.6505	18.4096	21.4324	0.296994	1	0.896563	0.369782
43	ALDOA	Fructose-bisphosphate aldolase A	P04075	IGEHTPSALAIMENANVLAR	20	2106.09	4.7865e-09	124.29	14875000	3	18.8183	22.4141	20.2792	21.9442	18.7286	21.5552	0.056697	1	0.238751	0.0899271
44	ALDOA	Fructose-bisphosphate aldolase A	P04075	YTPSGQAGAAASESLFVSNHAY	22	2227.02	0.026414	52.769	15549000	3	20.1108	22.612	19.8003	21.251	18.9469	21.9643	0.0318526	1	-0.120277	-0.0486316
45	ALDOA;ALDOC	Fructose-bisphosphate aldolase A;Fructose-bisphosphate aldolase C	P04075;P09972	PWALTFSYGR	10	1196.6	4.0745e-15	226.54	2572800000	22	28.9606	29.2907	27.873	27.4214	28.538	29.1075	0.208401	1	-0.35249	-0.190051
46	ALG14	UDP-N-acetylglucosamine transferase subunit ALG14 homolog	Q96F25	EVQQSWPSTVFTTLHSMWLSFPLIHR	26	3126.57	6.2466e-07	117.36	23643000	9	22.1525	22.9458	17.5533	21.2094	21.8077	22.1375	0.187223	1	0.834349	0.287433
47	ALG3	Dol-P-Man:Man(5)GlcNAc(2)-PP-Dol alpha-1,3-mannosyltransferase	Q92685	QFLFHWTVNWR	11	1532.77	0.00043553	93.843	11441000	3	21.0052	21.5394	19.8376	19.6214	20.5443	21.524	0.112404	1	-0.230868	-0.118731
48	AMDHD2	Putative N-acetylglucosamine-6-phosphate deacetylase	Q9Y303	AAEDAVWSGATFITHLFNAMLPFHHR	26	2938.43	2.451e-14	153.77	96514000	11	24.0986	25.0873	21.5141	23.5999	23.5509	23.8292	0.0293652	1	0.0933088	0.0411292
49	ANAPC5	Anaphase-promoting complex subunit 5	Q9UJX4	AVHFGLPYLASLGIQSLVQQR	21	2296.27	0.062548	36.856	5654300	0	19.8079	20.7111	18.6993	19.008	18.7752	20.626	0.119433	1	-0.269681	-0.133312
50	ANKRD13A	Ankyrin repeat domain-containing protein 13A	Q8IZ07	TLLHLAVSLGHLESAR	16	1715.97	3.8436e-05	98.507	9569400	2	19.3731	21.7708	20.9431	19.6259	20.2145	20.2767	0.37568	1	-0.656603	-0.339672
51	ANKZF1	Ankyrin repeat and zinc finger domain-containing protein 1	Q9H8Y5	VLSLLSAPLGSGGFTLLHAAAAAGR	25	2349.32	3.0222e-14	154.6	11179000	1	20.2398	22.1766	19.8618	19.8744	20.5247	20.7621	0.185965	1	-0.37236	-0.189549
52	ANXA5	Annexin A5	P08758	FITIFGTR	8	953.533	0.00075703	128.57	14645000	5	20.489	21.7078	21.4163	21.2563	20.7075	21.3815	0.0743226	1	-0.0892754	-0.0550486
53	ANXA5	Annexin A5	P08758	MLVVLLQANR	10	1155.68	7.7316e-05	114.6	3858700	0	16.9876	18.754	20.6997	18.3349	17.6843	20.6225	0.015879	1	0.0667597	0.0257368
54	ANXA6	Annexin A6	P08133	ILISLATGHR	10	1079.65	0.00010024	126.07	6109600	2	19.3061	19.8624	20.9663	16.1362	17.9041	21.187	0.452222	1	-1.63588	-0.593117
55	ANXA6	Annexin A6	P08133	ILISLATGHREEGGENLDQAR	21	2278.17	0.0001698	89.859	6479000	1	19.2084	21.0917	19.2718	19.8983	20.1172	19.7651	0.037682	1	0.06954	0.0380844
56	AP1B1	AP-1 complex subunit beta-1	Q10567	LTNGIWVLAELR	12	1383.79	5.6731e-05	113.69	8826900	1	19.3584	21.526	19.7311	19.727	19.5313	21.3318	0.00314463	1	-0.00845782	-0.00406779
57	AP2A2	AP-2 complex subunit alpha-2	O94973	NAVLFEAISLIIHHDSEPNLLVR	23	2599.41	3.5323e-06	110.72	5488900	1	18.7542	21.6357	18.4938	18.9842	19.292	19.2603	0.167474	1	-0.449045	-0.203055
58	AP2A2;AP2A1	AP-2 complex subunit alpha-2;AP-2 complex subunit alpha-1	O94973;O95782	GLAVFISDIR	10	1089.62	0.0035009	88.948	4745200	1	18.5194	20.6938	19.2883	18.7336	19.2029	19.9224	0.106693	1	-0.214201	-0.111307
59	AP2B1	AP-2 complex subunit beta	P63010	LTNGIWILAELR	12	1397.8	4.9274e-05	114.83	11626000	2	19.8599	22.3565	20.1614	19.7344	19.9955	21.0785	0.231066	1	-0.523134	-0.250557
60	AP2B1;AP1B1	AP-2 complex subunit beta;AP-1 complex subunit beta-1	P63010;Q10567	AAMIWIVGEYAER	13	1507.75	3.5e-05	107.24	4260400	1	18.2673	20.917	18.4116	18.4614	18.1263	19.8865	0.13586	1	-0.373901	-0.16877
61	AP2S1	AP-2 complex subunit sigma	P53680	LIEEVHAVVTVR	12	1363.78	0.0024456	83.617	6034400	1	18.9492	21.2176	16.0318	19.5386	19.5171	20.527	0.297742	1	1.12805	0.412085
62	AP3B2;AP3B1	AP-3 complex subunit beta-2;AP-3 complex subunit beta-1	Q13367;O00203	LVYVYLVR	8	1023.61	0.010221	81.381	6872900	1	17.6672	21.0464	20.5463	19.7725	19.918	20.2986	0.0806088	1	0.243068	0.107333
63	APEX1	DNA-(apurinic or apyrimidinic site) lyase;DNA-(apurinic or apyrimidinic site) lyase, mitochondrial	P27695	HLYPNTPYAYTFWTYMMNAR	20	2539.15	9.2414e-35	228.46	752770000	46	26.7768	28.0244	24.4094	26.9241	26.6988	26.6622	0.123109	1	0.358155	0.158247
64	AQR	Intron-binding protein aquarius	O60306	LNLQFLTLHDYLLR	14	1757.98	5.2818e-05	95.651	14522000	2	20.7515	22.5086	19.8913	20.3272	20.1528	21.6698	0.135791	1	-0.333872	-0.158447
65	ARF5;ARF4;ARF1;ARF3	ADP-ribosylation factor 5;ADP-ribosylation factor 4;ADP-ribosylation factor 1;ADP-ribosylation factor 3	F5H423;P84085;P18085;P84077;P61204	HYFQNTQGLIFVVDSNDR	18	2152.03	2.3311e-08	129.11	19135000	6	21.109	22.8429	21.3902	17.5833	18.0069	22.6544	0.62177	1	-2.36587	-0.812756
66	ARF5;ARF4;ARF1;ARF3	ADP-ribosylation factor 5;ADP-ribosylation factor 4;ADP-ribosylation factor 1;ADP-ribosylation factor 3	F5H423;P84085;P18085;P84077;P61204	HYFQNTQGLIFVVDSNDRER	20	2437.18	5.1324e-44	275.23	58589000	12	22.3067	24.9494	20.2636	22.8914	22.3102	22.6896	0.0304962	1	0.123809	0.0482309
67	ARFGAP1	ADP-ribosylation factor GTPase-activating protein 1	Q8N6T3	GLGVHLSFVR	10	1083.62	0.062964	40.715	15275000	5	20.4871	21.3551	21.6529	20.8471	21.1244	21.8007	0.0718976	1	0.0923443	0.0559664
68	ARFGAP3;ARFGAP2	ADP-ribosylation factor GTPase-activating protein 3;ADP-ribosylation factor GTPase-activating protein 2	Q9NP61;Q8N6H7	SLGVHLSFIR	10	1127.65	0.028452	58.37	10326000	4	20.313	17.5592	21.2207	20.7983	20.6668	21.5597	0.504925	1	1.31066	0.56119
69	ARHGEF2	Rho guanine nucleotide exchange factor 2	Q92974	LVNLYGLLHGLQAAVAQQDTLMEAR	25	2723.44	1.379e-09	134.34	29659000	4	21.5223	22.8107	21.1531	22.0949	21.9064	23.0271	0.34968	1	0.514079	0.283976
70	ARID2	AT-rich interactive domain-containing protein 2	Q68CP9	FLLLSAHSHFISLR	14	1639.92	0.0017802	85.457	10665000	1	20.3113	21.6082	20.8657	19.8492	20.7516	20.5606	0.509436	1	-0.541226	-0.324999
71	ARL1	ADP-ribosylation factor-like protein 1	P40616	FQVWDLGGQTSIRPYWR	17	2108.06	0.0050207	69.594	9137800	1	20.9978	21.8087	17.8142	20.2309	19.9672	19.7543	0.0631102	1	-0.222752	-0.0917885
72	ASCC3	Activating signal cointegrator 1 complex subunit 3	Q8N3C0	LTLAFGIGMHHAGLHER	17	1858.96	0.036382	54.288	5266400	1	19.5055	21.1333	19.9357	20.08	16.7577	17.2108	0.882243	1	-2.17531	-0.92624
73	ASNA1	ATPase ASNA1	O43681	GMNFSVVVFDTAPTGHTLR	19	2048.01	0.015415	60.564	7161200	1	20.0278	22.0753	20.5637	16.9116	17.6273	17.9324	2.11672	0.119429	-3.39852	-1.80427
74	ASUN	Protein asunder homolog	Q9NVM9	VISHMLSSHGGEIFLHVLSSSR	22	2392.23	3.5707e-09	127.48	4972300	1	19.508	21.1672	19.7001	19.9601	18.0986	17.562	0.819301	1	-1.58488	-0.75619
75	ATG4C	Cysteine protease ATG4C	Q96DT6	TGQMLLAQGLILHFLGR	17	1867.05	1.3534e-05	109.35	10083000	1	19.4337	21.7973	19.6189	19.6661	20.2793	21.4276	0.0662422	1	0.174421	0.0823584
76	ATIC	Bifunctional purine biosynthesis protein PURH;Phosphoribosylaminoimidazolecarboxamide formyltransferase;IMP cyclohydrolase	P31939	ANYWWLR	7	1007.5	5.687e-06	168.62	72564000	12	23.6303	23.9514	23.114	22.9821	23.0828	24.0284	0.185562	1	-0.20078	-0.124477
77	ATIC	Bifunctional purine biosynthesis protein PURH;Phosphoribosylaminoimidazolecarboxamide formyltransferase;IMP cyclohydrolase	P31939	LTEVSISSDAFFPFR	15	1714.86	1.9341e-07	123.67	11814000	3	20.5426	21.7997	19.8888	20.3661	19.9895	21.6421	0.0350075	1	-0.0777512	-0.0398459
78	ATL2	Atlastin-2	Q8NHH9	PFQTLMFLIR	10	1264.7	1.6204e-06	122.52	13025000	0	20.7152	22.5708	19.3295	19.598	20.3723	21.1099	0.189052	1	-0.511742	-0.22892
79	ATL3	Atlastin-3	Q6DD88	PFQTLMFLVR	10	1250.68	0.044451	62.2	4744700	0	19.1665	20.9905	18.7091	17.9741	19.4431	19.3625	0.34064	1	-0.695461	-0.340184
80	ATP5A1	ATP synthase subunit alpha, mitochondrial	P25705	EVAAFAQFGSDLDAATQQLLSR	22	2337.16	0.00032587	84.689	12036000	2	19.994	22.3449	19.075	20.6713	19.7057	21.3032	0.0276235	1	0.0887648	0.0389527
81	ATP5A1	ATP synthase subunit alpha, mitochondrial	P25705	FENAFLSHVVSQHQALLGTIR	21	2366.25	1.2137e-19	195.93	56864000	8	22.866	24.5428	22.2739	20.8269	22.1204	23.6636	0.408117	1	-1.02393	-0.452088
82	ATP5A1	ATP synthase subunit alpha, mitochondrial	P25705	GIRPAINVGLSVSR	14	1437.84	1.5861e-07	130.77	86705000	12	22.5836	24.3553	23.7059	23.3006	23.4072	24.5055	0.10594	1	0.189512	0.102712
83	ATP5A1	ATP synthase subunit alpha, mitochondrial	P25705	PAINVGLSVSR	11	1111.64	0.00012957	98.055	3224800	0	17.7146	18.632	19.5578	17.1086	17.1869	20.5555	0.100492	1	-0.35116	-0.143064
84	ATP5B	ATP synthase subunit beta, mitochondrial	P06576	GSITSVQAIYVPADDLTDPAPATTFAHLDATTVLSR	36	3713.88	5.9568e-09	108.71	15337000	2	19.8878	23.0845	17.0999	20.788	18.3359	21.6675	0.0408757	1	0.239743	0.0750198
85	ATP5B	ATP synthase subunit beta, mitochondrial	P06576	LVLEVAQHLGESTVR	15	1649.91	2.9239e-05	106.52	25576000	6	21.3856	22.4202	21.9217	22.1861	21.6292	22.32	0.137131	1	0.135916	0.0867893
86	ATP5B	ATP synthase subunit beta, mitochondrial	P06576	VALTGLTVAEYFR	13	1438.78	2.7648e-10	152.62	14213000	2	20.1435	22.7487	20.231	19.7785	20.2445	21.3295	0.239797	1	-0.590206	-0.271995
87	ATP5I	ATP synthase subunit e, mitochondrial	P56385	YSALFLGVAYGATR	14	1487.78	3.5446e-05	111.63	36625000	5	22.4407	23.5005	21.393	21.1232	21.7925	23.3094	0.155822	1	-0.369684	-0.17706
88	ATP6V1B2;ATP6V1B1	V-type proton ATPase subunit B, brain isoform;V-type proton ATPase subunit B, kidney isoform	P21281;P15313	HVLVILTDMSSYAEALR	17	1917	1.4851e-08	142.1	8496500	1	19.6875	22.2474	19.1124	18.542	19.2112	20.0924	0.429227	1	-1.06724	-0.4716
89	ATXN10	Ataxin-10	Q9UBB4	IVAYSSMILFTSLNHER	17	1980.01	1.893e-05	104.45	11137000	2	20.2946	22.6534	17.6456	20.2952	20.5452	18.7371	0.0767257	1	-0.338661	-0.123011
90	AURKB	Aurora kinase B	Q96GD4	IYLILEYAPR	10	1249.71	0.038834	54.982	1494900	0	17.4797	18.034	17.9397	16.8667	17.4975	18.8959	0.0349749	1	-0.0644747	-0.0353564
91	B3GALT6	Beta-1,3-galactosyltransferase 6	Q96L58	LYWGFFSGR	9	1131.55	0.00069463	116.73	10166000	2	20.5077	21.5198	19.7287	20.1418	20.1146	21.2578	0.0429031	1	-0.0806408	-0.0438062
92	B4GALT1	Beta-1,4-galactosyltransferase 1;Lactose synthase A protein;N-acetyllactosamine synthase;Beta-N-acetylglucosaminylglycopeptide beta-1,4-galactosyltransferase;Beta-N-acetylglucosaminyl-glycolipid beta-1,4-galactosyltransferase;Processed beta-1,4-galactosyltransferase 1	P15291	YWLYYLHPVLQR	12	1649.87	0.0034127	78.908	22023000	5	21.6505	22.8071	20.6676	21.2566	21.5721	21.9685	0.0580559	1	-0.109367	-0.0590629
93	BAG6	Large proline-rich protein BAG6	P46379	GVNPSLVSWLTTMMGLR	17	1860.96	6.7336e-12	149.02	46493000	14	22.272	23.6201	22.2007	22.1886	21.9682	23.8222	0.0168987	1	-0.0379321	-0.0195018
94	BANP	Protein BANP	Q8N9N5	MALTLLDYLFHR	12	1491.79	6.4024e-05	105.2	11436000	2	20.5931	21.698	19.7332	20.2371	20.5082	21.4443	0.0273657	1	0.0551243	0.0293828
95	BCS1L	Mitochondrial chaperone BCS1	Q9Y276	SYAWLLSWLTR	11	1394.73	0.0050808	76.143	20197000	0	17.8076	22.7235	18.2749	21.2587	21.4817	22.9014	0.621298	1	2.27856	0.79981
96	BDH2	3-hydroxybutyrate dehydrogenase type 2	Q9BUT1	VIILTAAAQGIGQAAALAFAR	21	2025.17	6.9383e-06	96.544	7415800	1	19.9891	21.684	16.5804	19.8436	19.6154	20.2669	0.118114	1	0.490787	0.180914
97	BECN1	Beclin-1	Q14457	TNVFNATFHIWHSGQFGTINNFR	23	2707.3	0.00012701	91.128	12467000	1	20.8505	21.96	19.8756	19.8833	20.485	21.5637	0.117702	1	-0.251374	-0.127129
98	BIRC6	Baculoviral IAP repeat-containing protein 6	Q9NR09	LVNILVQLPLSGNR	14	1534.92	1.7926e-10	151.15	11771000	3	19.7441	21.6075	21.2572	20.3515	21.0749	20.649	0.10517	1	-0.177747	-0.0982526
99	BLVRA	Biliverdin reductase A	P53004	NPHPSSAFLNLIGFVSR	17	1854.97	2.181e-05	101.9	17646000	3	20.8979	22.7896	20.5361	20.5056	20.196	22.0126	0.218641	1	-0.50314	-0.240034
100	BOP1	Ribosome biogenesis protein BOP1	Q14137	GDYLAVVLATQGHTQVLIHQLSR	23	2518.37	9.0355e-05	92.336	11204000	1	20.1102	22.6245	19.5496	19.1148	18.7069	20.8133	0.458695	1	-1.2164	-0.518825
101	BRCC3	Lys-63-specific deubiquitinase BRCC36	P46736	IVHIHSVIILR	11	1298.82	2.7287e-07	147.95	6853700	2	16.2685	21.1357	17.7745	19.42	20.391	21.2379	0.567857	1	1.95677	0.716363
102	BRIX1	Ribosome biogenesis protein BRX1 homolog	Q8TDN6	ELLIQIFSTPR	11	1315.75	0.0022448	85.377	2757800	0	18.2058	20.0182	18.5091	17.9893	17.9365	18.9584	0.400378	1	-0.616282	-0.33285
103	BUB3	Mitotic checkpoint protein BUB3	O43684	FSPNTSQFLLVSSWDTSVR	19	2170.07	5.3389e-09	123.63	11761000	2	19.7596	22.8281	17.599	19.6222	19.2772	20.7689	0.0370066	1	-0.172792	-0.0620962
104	BYSL	Bystin	Q13895	FYNLVLLPR	9	1133.66	0.042563	54.549	1969600	0	18.4027	19.7536	18.6857	18.2763	17.5929	17.8051	1.08334	1	-1.0559	-0.636772
105	BYSL	Bystin	Q13895	VLDALVFHFLGFR	13	1532.85	2.318e-18	217.47	298660000	18	25.3729	26.5943	24.6875	24.393	25.5206	25.7569	0.178443	1	-0.328106	-0.172813
106	C1QBP	Complement component 1 Q subcomponent-binding protein, mitochondrial	Q07021	DTNYTLNTDSLDWALYDHLMDFLADR	26	3117.4	3.9578e-10	142.87	5960700	1	18.4955	20.4397	18.2363	19.9245	18.6369	21.3995	0.367216	1	0.929782	0.411683
107	C4orf27	UPF0609 protein C4orf27	Q9NWY4	STGLNFNLHWR	11	1343.67	6.001e-05	112.75	11026000	3	20.5575	21.3172	21.0129	20.2704	20.226	21.1097	0.517264	1	-0.427155	-0.273389
108	CACYBP	Calcyclin-binding protein	Q9HB71	IYITLTGVHQVPTENVQVHFTER	23	2680.4	1.7275e-21	199.33	138770000	16	22.8295	25.4448	24.0432	24.4018	23.5296	25.0225	0.0864292	1	0.21213	0.102434
109	CAD	CAD protein;Glutamine-dependent carbamoyl-phosphate synthase;Aspartate carbamoyltransferase;Dihydroorotase	P27708	LPGLIDVHVHLR	12	1367.8	4.9161e-05	109.24	33668000	9	20.8772	22.9943	22.6469	22.3222	21.9319	22.8526	0.0993901	1	0.196107	0.102795
110	CAND1	Cullin-associated NEDD8-dissociated protein 1	Q86VP6	IDLRPVLGEGVPILASFLR	19	2064.21	0.042464	57.045	19951000	4	21.1845	22.5805	20.2726	21.8956	20.6413	22.0991	0.0873029	1	0.199448	0.0991667
111	CAND1	Cullin-associated NEDD8-dissociated protein 1	Q86VP6	ISGSILNELIGLVR	14	1482.88	1.6321e-13	177.76	20625000	4	21.1362	22.6639	20.2187	21.9056	20.4451	22.2818	0.079557	1	0.204533	0.09708
112	CAND1	Cullin-associated NEDD8-dissociated protein 1	Q86VP6	MLTFLMLVR	9	1122.63	0.00043605	112.17	11993000	4	20.2993	21.4618	21.0053	19.1607	20.6918	21.7097	0.188487	1	-0.40139	-0.199268
113	CANX	Calnexin	P27824	THLYTLILNPDNSFEILVDQSVVNSGNLLNDMTPPVNPSR	40	4436.23	2.6277e-09	106.66	9238100	1	19.8073	22.38	16.9869	19.6651	19.3647	20.371	0.0157999	1	0.0755723	0.0271286
114	CAPN1	Calpain-1 catalytic subunit	P07384	LGLVEFNILWNR	12	1472.81	4.2973e-06	127.3	9781800	2	20.2334	21.7141	19.7688	19.3799	19.8489	21.3039	0.182324	1	-0.394576	-0.194917
115	CASP8	Caspase-8;Caspase-8 subunit p18;Caspase-8 subunit p10	Q14790	INRLDLLITYLNTR	14	1716.99	7.8251e-05	101.75	6108400	1	19.4008	21.9139	18.4016	18.6838	19.2281	18.7131	0.413494	1	-1.0304	-0.455994
116	CBR1	Carbonyl reductase [NADPH] 1	P16152	LFSGDVVLTAR	11	1176.65	0.0022386	90.108	7170200	1	18.9903	20.6159	20.1058	20.3427	19.5373	20.7983	0.205619	1	0.32204	0.178392
117	CBR1	Carbonyl reductase [NADPH] 1	P16152	VVNVSSIMSVR	11	1189.65	1.0116e-05	127.4	5402400	1	18.9666	21.254	20.076	20.1898	16.4266	18.6464	0.586808	1	-1.67791	-0.677583
118	CCAR2	Cell cycle and apoptosis regulator protein 2	Q8N163	ILLTLGIR	8	897.601	0.00039982	138.07	10353000	4	20.0178	21.8667	21.5689	17.6864	21.1679	18.5109	0.78217	1	-2.02939	-0.846783
119	CCAR2	Cell cycle and apoptosis regulator protein 2	Q8N163	SLLVPSDFLSVHLSWLSAFPLSQPFSLHHPSR	32	3600.89	1.8102e-07	110.7	73867000	8	22.9093	23.7106	21.1618	23.8498	24.2182	23.8652	0.842971	1	1.38382	0.705291
120	CCDC116	Coiled-coil domain-containing protein 116	Q8IYX3	PLVPEMR	7	840.453	0.074119	40.921	9329200	1	20.6656	18.1367	21.0843	20.6661	20.5977	21.0638	0.364552	1	0.813669	0.381629
121	CCDC134	Coiled-coil domain-containing protein 134	Q9H6E4	IVHYYFDHNSNWNLLIR	17	2203.1	0.0008653	86.944	8089800	2	17.1554	21.911	19.78	16.1724	17.4164	21.5291	0.229252	1	-1.24286	-0.373909
122	CCDC178	Coiled-coil domain-containing protein 178	Q5BJE1	IGTLFHLTK	9	1142.64	0.062746	37.191	12327000	4	20.3581	17.9139	21.6329	21.3986	20.816	21.5733	0.508347	1	1.29437	0.559152
123	CCDC53	WASH complex subunit CCDC53	Q9Y3C0	TVAFLNQFVVHTVQFLNR	18	2132.15	9.779e-13	166.92	36887000	6	22.3239	23.3612	21.5499	22.033	22.6525	22.7198	0.0337408	1	0.0567697	0.032102
124	CCNB1	G2/mitotic-specific cyclin-B1	P14635	ALNFGLGRPLPLHFLR	16	1820.06	0.00059982	91.032	17974000	2	21.1503	23.2845	19.1362	20.3652	20.8348	20.6386	0.182509	1	-0.57749	-0.240083
125	CCT2	T-complex protein 1 subunit beta	P78371	IHPQTIIAGWR	11	1290.72	0.010409	66.595	8237800	2	19.4133	21.117	20.3577	20.3619	19.5265	20.7946	0.0375378	1	-0.0683524	-0.0376073
126	CCT2	T-complex protein 1 subunit beta	P78371	LAVEAVLR	8	869.533	0.001185	104.45	10053000	3	19.6976	20.7472	20.5608	20.7047	20.2924	21.4688	0.442323	1	0.486791	0.29105
127	CCT2	T-complex protein 1 subunit beta	P78371	LIHFSGVALGEACTIVLR	18	1955.07	3.2253e-08	121.82	18151000	4	20.9311	22.6359	21.2519	20.888	21.178	21.4291	0.333211	1	-0.441238	-0.252722
128	CCT2	T-complex protein 1 subunit beta	P78371	QVLLSAAEAAEVILR	15	1581.91	0.055077	49.448	5122400	0	19.074	20.7592	18.8938	18.9278	18.4698	20.4644	0.124622	1	-0.288352	-0.140892
129	CCT3	T-complex protein 1 subunit gamma	P49368	GISDLAQHYLMR	12	1402.7	0.0011215	90.05	7943300	3	19.8807	21.2786	15.9255	20.8876	18.9868	20.867	0.285483	1	1.21886	0.417069
130	CCT3	T-complex protein 1 subunit gamma	P49368	TAVETAVLLLR	11	1184.71	4.1384e-06	140.14	15881000	2	20.1328	22.4531	21.489	20.6993	20.5493	21.4218	0.256819	1	-0.468142	-0.243205
131	CCT4	T-complex protein 1 subunit delta	P50991	ALIAGGGAPEIELALR	16	1549.88	8.9159e-06	118.48	12448000	3	20.1559	21.399	21.3015	20.7696	20.6322	21.2634	0.0493642	1	-0.0636991	-0.0387761
132	CCT5	T-complex protein 1 subunit epsilon	P48643	WVGGPEIELIAIATGGR	17	1737.94	8.0524e-08	129.37	5771500	2	18.8751	21.899	18.5173	18.9722	18.9035	16.9038	0.520617	1	-1.504	-0.609137
133	CCT6A	T-complex protein 1 subunit zeta	P40227	AQAALAVNISAAR	13	1254.7	2.1689e-10	157.38	20343000	7	20.5804	21.8617	21.6647	21.2178	21.2247	22.6865	0.209383	1	0.340729	0.186164
134	CCT8	T-complex protein 1 subunit theta	P50990	LATNAAVTVLR	11	1127.67	5.6604e-07	147.75	12160000	3	19.9385	21.1842	21.0201	20.4417	20.5022	21.8331	0.129628	1	0.21143	0.117523
135	CCT8	T-complex protein 1 subunit theta	P50990	LFVTNDAATILR	12	1332.74	0.00012165	103.7	6536100	1	17.137	21.0622	19.4109	20.7392	17.6716	20.689	0.11865	1	0.496541	0.182265
136	CCT8	T-complex protein 1 subunit theta	P50990	LIAQACVSIFPDSGHFNVDNIR	22	2472.22	4.4722e-09	121.63	13545000	3	20.5069	22.3603	20.1406	20.5786	20.6423	21.141	0.109734	1	-0.215305	-0.112744
137	CDC20	Cell division cycle protein 20 homolog	Q12834	EKASAAKSSLIHQGIR	16	1923.03	0.0042003	71.344	4365300	1	19.7252	19.6991	21.2544	17.1552	17.9367	18.5212	1.65455	0.886769	-2.35519	-1.27393
138	CDC23	Cell division cycle protein 23 homolog	Q9UJX2	SSYIVSQIAVAYHNIR	16	1819.96	0.0011566	87.083	5059100	1	19.1252	21.291	18.9651	17.8972	18.715	19.4877	0.550497	1	-1.09379	-0.525998
139	CDC42	Cell division control protein 42 homolog	P60953	TPFLLVGTQIDLR	13	1471.84	8.0339e-08	138.76	12875000	3	20.2926	21.6609	21.0056	20.1248	20.3518	21.8144	0.123211	1	-0.222698	-0.119689
140	CDC73	Parafibromin	Q6P1J9	EYYTLDSILFLLNNVHLSHPVYVR	24	2904.52	5.3823e-06	101.29	45673000	7	22.516	23.3788	21.1418	23.047	22.4498	23.5236	0.385809	1	0.661259	0.344115
141	CDK1	Cyclin-dependent kinase 1	P06493	SYLYQILQGIVFCHSR	16	1983	1.1435e-05	114.59	83409000	7	24.1665	24.6252	22.1386	22.8169	23.6317	23.7074	0.11496	1	-0.258109	-0.128066
142	CDK1	Cyclin-dependent kinase 1	P06493	VYTHEVVTLWYR	12	1564.8	0.003779	77.124	7476900	1	19.6027	21.4972	19.546	19.4985	19.5373	20.4712	0.204903	1	-0.379641	-0.198175
143	CDK14;CDK16	Cyclin-dependent kinase 14;Cyclin-dependent kinase 16	O94921;Q00536	LFLFQLLR	8	1048.64	0.0071204	86.113	5499200	1	19.0618	20.7978	19.5261	18.7585	19.6646	20.0684	0.174443	1	-0.298048	-0.161326
144	CDK2	Cyclin-dependent kinase 2	P24941	SYLFQLLQGLAFCHSHR	17	2076.04	9.5747e-09	144.33	38234000	3	23.0723	23.2472	20.1243	19.9174	22.8513	23.2181	0.0354227	1	-0.152309	-0.0573648
145	CDK4	Cyclin-dependent kinase 4	P11802	IYSYQMALTPVVVTLWYR	18	2202.15	0.0021957	68.243	6310100	1	19.7304	21.7932	18.6486	18.4244	19.9929	17.8865	0.504449	1	-1.28945	-0.55627
146	CDK7	Cyclin-dependent kinase 7	P50613	AYMLMTLQGLEYLHQHWILHR	21	2652.35	7.0362e-14	167.05	18816000	4	21.7169	22.0937	20.3083	20.8568	22.1319	21.5637	0.077473	1	0.144496	0.0778241
147	CDK8;CDK19	Cyclin-dependent kinase 8;Cyclin-dependent kinase 19	P49336;Q9BWU1	SLLYQILDGIHYLHANWVLHR	21	2560.37	1.7043e-09	139.11	96375000	7	23.2816	25.1598	22.2791	24.2236	23.4315	23.5986	0.0708494	1	0.177723	0.0855244
148	CDKN2B;CDKN2A	Cyclin-dependent kinase 4 inhibitor B;Cyclin-dependent kinase inhibitor 2A	P42772;P42771	EGFLDTLVVLHR	12	1397.77	0.026974	59.57	6329700	1	19.1109	21.7257	20.2105	17.6305	17.9354	20.0455	0.778504	1	-1.81188	-0.797169
149	CERS2	Ceramide synthase 2	Q96G23	MLQTLYDYFWWER	13	1849.85	1.9613e-08	144.65	10662000	2	19.9512	21.552	18.471	20.9764	20.0105	21.5596	0.357923	1	0.857393	0.390124
150	CFB	Complement factor B;Complement factor B Ba fragment;Complement factor B Bb fragment	B4E1Z4;P00751	YGLVTYATYPK	11	1388.7	0.066457	54.157	14849000	1	20.6716	21.974	19.9529	22.0451	20.6061	21.0162	0.186371	1	0.356312	0.184608
151	CHD4	Chromodomain-helicase-DNA-binding protein 4	Q14839;A0A2R8Y445	HDYWLLAGIINHGYAR	16	1897.96	5.7195e-12	160.48	10915000	2	20.263	21.7957	19.8832	19.6045	19.5295	21.7371	0.14223	1	-0.35695	-0.167559
152	CHD4	Chromodomain-helicase-DNA-binding protein 4	Q14839;A0A2R8Y445	RHDYWLLAGIINHGYAR	17	2054.06	0.00017302	93.754	16946000	4	21.3155	22.9716	19.5416	20.4031	20.5077	21.2365	0.21225	1	-0.560459	-0.251955
153	CHEK1	Serine/threonine-protein kinase Chk1	O14757	FFHQLMAGVVYLHGIGITHR	20	2295.21	2.8907e-06	110.41	65073000	21	22.7731	24.1939	23.0604	22.4372	23.1587	23.8312	0.123655	1	-0.200118	-0.11169
154	CHID1	Chitinase domain-containing protein 1	Q9BWS9	VGLIHMLTHLAEALHQAR	18	2009.1	6.0888e-18	182.18	102000000	22	23.3957	23.9761	24.3207	22.5519	23.6871	25.0126	0.0674492	1	-0.147004	-0.0749811
155	CHTF18	Chromosome transmission fidelity protein 18 homolog	Q8WVB6	YPPFLPVAFHVLFASSHTPR	20	2282.2	0.00033326	85.231	9035200	3	20.1275	21.8352	19.797	18.2806	20.8189	20.4038	0.303481	1	-0.752129	-0.34058
156	CIRH1A	Cirhin	Q969X6	QLLLFQFAHHLELWR	15	1950.06	0.049841	52.026	5725500	1	19.9077	20.9582	18.9242	18.4988	19.0012	20.3233	0.338335	1	-0.655561	-0.327686
157	CKB	Creatine kinase B-type	P12277	LAVEALSSLDGDLAGR	16	1585.83	1.8602e-11	148.18	27473000	5	20.7178	23.2738	21.2811	22.4145	20.7766	22.4354	0.0422661	1	0.117881	0.0548203
158	CKB	Creatine kinase B-type	P12277	TDLNPDNLQGGDDLDPNYVLSSR	23	2517.16	7.7137e-06	97.253	7873000	3	18.3267	21.2266	18.8345	21.0987	17.6758	21.0479	0.120915	1	0.478196	0.18093
159	CKB	Creatine kinase B-type	P12277	TFLVWVNEEDHLR	13	1656.83	8.1482e-09	146.5	35592000	7	21.3625	24.1265	21.1176	21.6778	21.1327	22.6654	0.130166	1	-0.376912	-0.166486
160	CKB	Creatine kinase B-type	P12277	VLTPELYAELR	11	1302.72	2.7828e-07	155.84	54002000	12	22.3963	23.7184	22.8791	23.2443	22.2953	23.5023	0.00991696	1	0.0160402	0.00925693
161	CKS2	Cyclin-dependent kinases regulatory subunit 2	P33552	LGVQQSLGWVHYMIHEPEPHILLFR	25	2998.56	2.1727e-06	111.13	21046000	3	19.4328	23.1817	18.4362	21.9012	22.6832	17.391	0.048185	1	0.308262	0.0908656
162	CLINT1	Clathrin interactor 1	Q14677	SLLLLAYLIR	10	1173.75	7.5377e-14	205.13	77558000	8	23.4671	24.1084	22.261	20.3937	22.3727	25.1031	0.168511	1	-0.655652	-0.245679
163	CLNS1A	Methylosome subunit pICln	P54105	LSWLDGSGLGFSLEYPTISLHALSR	25	2718.4	1.1042e-20	182.39	188500000	11	24.3909	26.2351	23.3991	24.5043	24.9881	24.2079	0.0428516	1	-0.108277	-0.0525243
164	CLTC	Clathrin heavy chain 1	Q00610	FDFVHDLVLYLYR	13	1698.88	1.2377e-11	173.71	43598000	6	22.8338	23.0189	21.5897	21.2378	21.85	24.1185	0.0268229	1	-0.0787214	-0.036037
165	CLTC	Clathrin heavy chain 1	Q00610	LASTLVHLGEYQAAVDGAR	19	1970.02	3.4864e-09	132.13	16904000	3	19.8718	22.7341	20.9135	21.1666	20.1507	21.7287	0.05709	1	-0.157807	-0.0732146
166	CLTC	Clathrin heavy chain 1	Q00610	LLEMNLMHAPQVADAILGNQMFTHYDR	27	3127.5	3.6337e-06	112.86	18330000	5	20.6708	22.7045	20.7897	21.452	19.2668	22.1058	0.154385	1	-0.446854	-0.195804
167	CLTC	Clathrin heavy chain 1	Q00610	SVDPTLALSVYLR	13	1432.79	2.7751e-10	152.54	22655000	5	21.0568	22.8774	21.6337	21.2313	21.4485	21.999	0.194917	1	-0.296359	-0.166144
168	CLTC	Clathrin heavy chain 1	Q00610	WLLLTGISAQQNR	13	1498.83	1.6282e-13	187.64	53135000	9	22.5135	24.2816	22.8332	22.2501	22.3852	23.0715	0.460612	1	-0.640498	-0.355733
169	CLTC;CLTCL1	Clathrin heavy chain 1;Clathrin heavy chain 2	Q00610;P53675	VGYTPDWIFLLR	12	1478.79	0.0001456	100.02	19485000	3	21.4138	23.3035	19.7068	20.309	18.0733	21.9963	0.36605	1	-1.34855	-0.492277
170	CMAS	N-acylneuraminate cytidylyltransferase	Q8NFW8	HLAGVPLIGWVLR	13	1429.86	0.0010821	89.548	8104800	1	19.6986	21.4506	19.7089	19.7631	19.6946	20.7737	0.111489	1	-0.208931	-0.111206
171	CMSS1	Protein CMSS1	Q9BQ75	FLVFDWNWR	9	1281.63	6.8092e-06	162.97	19907000	5	21.4959	22.7065	19.9074	21.2144	20.9562	22.1502	0.0265683	1	0.0703481	0.0336926
172	CNOT1	CCR4-NOT transcription complex subunit 1	A5YKK6	APGFVYAWLELISHR	15	1757.93	7.5317e-08	131.53	10226000	2	20.2613	22.0451	18.4264	20.1145	20.3912	21.0233	0.0873732	1	0.265411	0.116473
173	COMMD5	COMM domain-containing protein 5	Q9GZQ3	SLQPSVLMQLK	11	1356.74	0.02707	60.59	5239700	1	18.4514	20.9084	18.8702	19.6099	18.4472	20.2838	0.0131479	1	0.0369625	0.0173589
174	COPA	Coatomer subunit alpha;Xenin;Proxenin	P53621	RPWILTSLHNGVIQLWDYR	19	2366.26	5.3488e-26	212.9	163680000	20	24.1473	25.878	22.9238	24.2107	24.4366	24.9913	0.0923015	1	0.229804	0.110068
175	COPB1	Coatomer subunit beta	P53618	NAVLAIYTIYR	11	1295.72	8.6234e-05	114.51	8215400	1	19.5235	21.8453	19.6409	19.1986	19.4415	20.5758	0.277381	1	-0.597926	-0.289383
176	COPE	Coatomer subunit epsilon	O14579	SVDVTNTTFLLMAASIYLHDQNPDAALR	28	3075.53	2.3278e-29	209.16	31174000	4	21.7881	24.1303	18.3818	21.6361	19.844	22.1481	0.0421842	1	-0.224	-0.0744389
177	COPG1	Coatomer subunit gamma-1	Q9Y678	HAVLMNFLFTMLR	13	1591.84	1.2672e-07	122.33	48812000	12	23.0295	23.5925	22.7861	21.2335	22.8776	23.2815	0.428386	1	-0.671823	-0.359208
178	COPG2	Coatomer subunit gamma-2	Q9UBF2	ATFYLNVLQQR	11	1351.72	5.7066e-06	136.8	8496200	1	19.9151	21.0884	20.6434	19.9075	20.2326	20.4421	0.399761	1	-0.354901	-0.225234
179	COPG2	Coatomer subunit gamma-2	Q9UBF2	FGAQNESLLPSILVLLQR	18	1997.13	0.00082436	82.349	6695100	1	19.4511	21.449	18.6894	19.5669	19.4788	20.1769	0.0492758	1	-0.122319	-0.0596204
180	COPG2	Coatomer subunit gamma-2	Q9UBF2	HSVMMTFLSNMLR	13	1565.75	1.4745e-05	114.72	8934700	1	20.4642	21.9209	18.2184	19.6628	20.6514	19.4886	0.0831268	1	-0.266919	-0.114256
181	COPG2	Coatomer subunit gamma-2	Q9UBF2	NSHSLYLAGIFR	12	1376.72	0.058489	40.287	3559200	0	18.6986	20.3737	18.9181	18.8792	16.8762	19.6053	0.379254	1	-0.876539	-0.403807
182	COPG2	Coatomer subunit gamma-2	Q9UBF2	WINEAQEAASSDNIMVQYHALGVLYHLR	28	3227.58	8.2661e-07	105.73	4893100	1	19.0628	21.5657	17.6603	18.5384	18.6201	18.8042	0.271319	1	-0.77539	-0.330666
183	COPZ1	Coatomer subunit zeta-1	P61923	GEDVPLTEQTVSQVLQSAKEQIKWSLLR	28	3409.78	1.5493e-06	98	8163800	1	18.8833	17.8242	18.7328	20.4247	19.9675	22.4504	1.38449	0.9335	2.46744	1.21455
184	COTL1	Coactosin-like protein	Q14019	FALITWIGENVSGLQR	16	1802.97	8.6552e-23	201.46	33636000	5	21.8265	23.9001	20.9234	21.3888	21.3143	22.7223	0.153644	1	-0.40821	-0.186157
185	COX20	Cytochrome c oxidase protein 20 homolog	Q5RI15	HSILYGSLGSVVAGFGHFLFTSR	23	2451.27	7.1836e-38	239.1	23289000	3	21.8827	22.8831	20.1006	20.8954	21.8463	22.2069	0.0100086	1	0.0274309	0.0130445
186	CPT2	Carnitine O-palmitoyltransferase 2, mitochondrial	P23786	FVPSSLSWYGAYLVNAYPLDMSQYFR	26	3073.47	0.021311	54.259	13810000	3	20.1628	21.4695	19.55	20.718	21.1669	22.2201	0.606395	1	0.974233	0.507377
187	CPT2	Carnitine O-palmitoyltransferase 2, mitochondrial	P23786	HTSYISGPWFDMYLSAR	17	2029.94	0.0013038	82.349	9307100	1	20.4241	21.1145	19.3087	19.7193	20.1533	21.4928	0.0814118	1	0.17269	0.0885849
188	CPTP	Ceramide-1-phosphate transfer protein	Q5TA50	ALHWLQLFLEGLR	13	1594.9	1.3188e-06	121.02	17842000	5	21.3865	22.3112	19.9389	21.3312	21.4823	21.6639	0.149847	1	0.280248	0.14773
189	CROT	Peroxisomal carnitine O-octanoyltransferase	Q9UKG9	GSITLWHNLNYWQLLR	16	2013.06	6.6136e-08	130.61	12404000	2	20.842	21.895	19.73	20.2614	20.6835	21.4243	0.015183	1	-0.0326068	-0.0170582
190	CS	Citrate synthase, mitochondrial	O75390	AALPSHVVTMLDNFPTNLHPMSQLSAAVTALNSESNFAR	39	4151.06	1.6515e-53	270.66	241810000	33	24.3639	25.7196	24.0794	25.7232	24.5787	25.9931	0.460569	1	0.71069	0.380789
191	CS	Citrate synthase, mitochondrial	O75390	ALGVLAQLIWSR	12	1325.78	2.5045e-15	202.44	223860000	11	21.5593	25.9379	24.241	23.9931	24.8852	26.4069	0.334941	1	1.18234	0.445089
192	CS	Citrate synthase, mitochondrial	O75390	LRDYIWNTLNSGR	13	1606.82	0.0090386	70.373	6698100	1	19.647	21.3828	18.5118	20.4418	19.35	19.3671	0.0480589	1	-0.127567	-0.0604701
193	CSE1L	Exportin-2	P55060	EHLLVSIPLLINHLQAESIVVHTYAAHALER	31	3485.91	6.4346e-11	143.8	10370000	1	19.9492	22.7246	19.0252	20.74	17.5957	17.1158	0.584381	1	-2.08248	-0.746468
194	CSE1L	Exportin-2	P55060	QIFILLFQR	9	1176.7	2.3022e-06	170.73	37861000	7	22.0533	23.8426	21.6875	21.5425	21.9774	22.9144	0.187912	1	-0.383043	-0.193534
195	CSTF2;CSTF2T	Cleavage stimulation factor subunit 2;Cleavage stimulation factor subunit 2 tau variant	P33240;Q9H0L4	NMLLQNPQLAYALLQAQVVMR	21	2413.3	2.5596e-09	134.21	11524000	2	19.8763	22.4117	18.4397	20.1304	20.0032	21.2115	0.0582432	1	0.205827	0.0849551
196	CTBP1	C-terminal-binding protein 1	Q13363	VLNEAVGALMYHTITLTR	18	2001.07	0.0016654	69.148	8656100	1	19.4844	21.7413	20.4698	20.7094	17.4895	20.2536	0.378381	1	-1.081	-0.450514
197	CTSD	Cathepsin D;Cathepsin D light chain;Cathepsin D heavy chain	A0A1B0GU03;P07339	LVDQNIFSFYLSR	13	1600.82	2.3121e-24	232.14	24776000	5	21.864	23.3145	20.8593	21.7771	19.7438	21.9855	0.346548	1	-0.843839	-0.381909
198	CYB5B	Cytochrome b5 type B	O43169	ELWLVIHGR	9	1121.63	0.040009	55.676	10823000	2	20.1463	18.67	21.1523	20.7182	20.6957	21.7355	0.593753	1	1.06026	0.530589
199	CYB5R3	NADH-cytochrome b5 reductase 3;NADH-cytochrome b5 reductase 3 membrane-bound form;NADH-cytochrome b5 reductase 3 soluble form	P00387	FALPSPQHILGLPVGQHIYLSAR	23	2513.39	4.0469e-08	121.47	40035000	14	22.0265	23.5287	22.1096	22.3499	22.1512	23.1225	0.00792913	1	-0.0137622	-0.00777328
200	CYFIP2	Cytoplasmic FMR1-interacting protein 2	Q96F07	PLNIAYSHIYSSYR	14	1682.84	1.6087e-05	113.72	5037600	1	20.0911	21.3155	19.0044	19.5825	16.7668	16.3482	0.992068	1	-2.57115	-1.06452
201	CYP51A1	Lanosterol 14-alpha demethylase	Q16850	VAQLYADLDGGFSHAAWLLPGWLPLPSFR	29	3196.65	2.2322e-07	116.4	11274000	2	20.2059	21.7825	19.1506	19.545	21.0653	21.4756	0.119313	1	0.315678	0.145865
202	CYP8B1	7-alpha-hydroxycholest-4-en-3-one 12-alpha-hydroxylase	Q9UNU6	KNMFEFLK	8	1283.63	0.0080581	79.597	8995500	1	20.2201	21.4984	19.7698	18.9251	19.7512	21.2749	0.233672	1	-0.512395	-0.24859
203	DAGLB	Sn1-specific diacylglycerol lipase beta	Q8NCG7	LVIVGHSLGGGAAALLATMLR	21	2019.17	0.00024563	87.49	5284300	1	20.1805	20.998	19.0259	18.866	19.9174	17.7732	0.652464	1	-1.21592	-0.595201
204	DARS	Aspartate--tRNA ligase, cytoplasmic	P14868	VTMLFLGLHNVR	12	1398.78	2.7036e-06	125.22	74535000	24	23.0527	24.8344	23.3169	23.0269	21.5405	23.7258	0.498103	1	-0.970264	-0.473184
205	DCPS	m7GpppX diphosphatase	Q96C86	VYLHYLPSYYHLHVHFTALGFEAPGSGVER	30	3458.72	6.4453e-15	154.71	164740000	4	23.5886	25.3427	23.2159	24.0237	25.3399	25.2646	0.455834	1	0.826998	0.417186
206	DDB1	DNA damage-binding protein 1	Q16531	ALYYLQIHPQELR	13	1642.88	3.0936e-05	107.17	22789000	7	21.8558	22.8443	21.6856	21.3696	20.9727	21.6641	0.8954	1	-0.793129	-0.491701
207	DDOST	Dolichyl-diphosphooligosaccharide--protein glycosyltransferase 48 kDa subunit	P39656	LGYTHLYSSTQVSVRPLQHTQYER	24	2862.44	4.3613e-06	104.63	8379200	2	19.4922	21.4394	19.996	18.9449	19.5926	21.2284	0.162565	1	-0.387255	-0.184791
208	DDX1	ATP-dependent RNA helicase DDX1	Q92499	EAQTSFLHLGYLPNQLFR	18	2133.1	0.0147	62.165	11559000	2	20.43	22.2748	19.2259	20.6069	19.5041	21.0146	0.0965262	1	-0.268328	-0.122257
209	DDX17	Probable ATP-dependent RNA helicase DDX17	Q92841	TLAYLLPAIVHINHQPYLER	20	2360.3	4.618e-10	145.88	49525000	8	22.4938	24.0351	21.8137	22.5315	22.4946	23.3606	0.00673648	1	0.0146821	0.00766545
210	DDX19A;DDX25	ATP-dependent RNA helicase DDX19A;ATP-dependent RNA helicase DDX25	Q9NUU7;Q9UHL0	TAAFVLAMLSR	11	1178.65	0.00012916	110.38	12021000	2	20.7172	22.8105	18.9764	18.7419	19.0049	20.478	0.506249	1	-1.42645	-0.586285
211	DDX39B	Spliceosome RNA helicase DDX39B	Q13838	CIALAQLLVEQNFPAIAIHR	20	2276.25	4.7082e-09	124.68	9059700	1	20.2535	21.4703	19.3057	20.1735	19.6348	21.1077	0.016499	1	-0.0377941	-0.0192827
212	DDX39B;DDX39A	Spliceosome RNA helicase DDX39B;ATP-dependent RNA helicase DDX39A	Q13838;O00148	ILVATNLFGR	10	1102.65	2.3366e-09	182.68	38134000	10	21.6203	23.2467	23.0227	22.4388	22.1049	22.5732	0.186494	1	-0.257637	-0.14913
213	DDX39B;DDX39A	Spliceosome RNA helicase DDX39B;ATP-dependent RNA helicase DDX39A	Q13838;O00148	RILVATNLFGR	11	1258.75	0.00010055	106.62	11981000	3	19.9296	22.2327	16.9308	21.76	21.1812	17.8705	0.105615	1	0.572882	0.18155
214	DDX5	Probable ATP-dependent RNA helicase DDX5	P17844	TLSYLLPAIVHINHQPFLER	20	2360.3	1.8424e-09	139.17	61685000	11	22.8689	24.4412	20.1982	22.8677	23.1172	23.6639	0.220676	1	0.713517	0.28998
215	DDX6	Probable ATP-dependent RNA helicase DDX6	P26196	FGHLGLAINLITYDDR	16	1816.95	8.5328e-08	125.53	26675000	5	21.8005	22.6287	22.4059	20.7167	21.9522	22.3101	0.498054	1	-0.618727	-0.3551
216	DHCR24	Delta(24)-sterol reductase	Q15392	PGWLTVSLR	9	1027.58	0.00066134	119.27	8970400	2	19.8536	20.2751	21.4132	19.0549	19.6622	21.3029	0.245387	1	-0.507299	-0.251493
217	DHX15	Pre-mRNA-splicing factor ATP-dependent RNA helicase DHX15	O43143	ALVTGYFMQVAHLER	15	1733.89	1.9095e-05	111.74	30342000	4	21.5029	23.9235	20.8176	21.1068	20.9594	22.3412	0.231098	1	-0.612232	-0.273443
218	DHX38	Pre-mRNA-splicing factor ATP-dependent RNA helicase PRP16	Q92620	FAAFFGNVPIFHIPGR	16	1788.95	4.2137e-05	95.651	18854000	4	21.6081	22.8358	19.987	20.4011	21.095	21.7417	0.164278	1	-0.397706	-0.188372
219	DHX57	Putative ATP-dependent RNA helicase DHX57	Q6P158	LMLFGSIFR	9	1082.59	0.0062442	81.548	5488000	1	19.185	20.8861	19.4906	18.4222	19.213	20.2633	0.301591	1	-0.554418	-0.28471
220	DHX9	ATP-dependent RNA helicase A	Q08211	DINTDFLLVVLR	12	1416.8	0.00024844	91.584	4193300	0	18.329	20.8641	18.5114	18.0965	18.2116	19.9286	0.185094	1	-0.489276	-0.221527
221	DHX9	ATP-dependent RNA helicase A	Q08211	FSDHVALLSVFQAWDDAR	18	2076.01	1.9045e-08	132.59	21683000	2	20.4289	23.7183	19.0997	20.8521	19.957	21.5159	0.0746863	1	-0.30729	-0.116173
222	DHX9	ATP-dependent RNA helicase A	Q08211	QISRPSAAGINLMIGSTR	18	1871	1.7367e-08	140.81	7633500	1	19.3704	21.3241	19.1841	20.8541	20.1755	19.3212	0.06733	1	0.157368	0.078078
223	DIAPH1	Protein diaphanous homolog 1	O60610	AEPHFLSILQHLLLVR	16	1885.09	7.6974e-12	155.57	152190000	16	24.1774	25.2143	23.8723	24.2959	24.6529	24.9299	0.174202	1	0.2049	0.124508
224	DIAPH1	Protein diaphanous homolog 1	O60610	TAQNLSIFLGSFR	13	1452.77	3.9878e-05	110.93	8689900	1	19.3886	21.7708	19.6589	19.7154	19.3683	20.9742	0.101498	1	-0.253455	-0.12085
225	DIP2C	Disco-interacting protein 2 homolog C	Q9Y2E4	IQQLVNTLKR	10	1325.78	0.069323	33.55	6856000	0	18.9374	19.9926	17.849	17.9649	20.3105	21.9389	0.36547	1	1.14509	0.456406
226	DIS3	Exosome complex exonuclease RRP44	Q9Y2L1	NVIVLQTVLQEVR	13	1509.89	2.8339e-10	152.07	6924500	1	18.151	22.0592	19.5725	18.4847	18.573	19.4712	0.385367	1	-1.08461	-0.454805
227	DNAJA1	DnaJ homolog subfamily A member 1	P31689	NVVHQLSVTLEDLYNGATR	19	2128.09	3.1269e-09	133.78	9967900	1	19.8683	22.5497	19.6014	20.9854	18.394	18.4667	0.475236	1	-1.3911	-0.563269
228	DNAJA1	DnaJ homolog subfamily A member 1	P31689	VNFPENGFLSPDKLSLLEKLLPER	24	2982.58	0.0024957	67.614	18295000	3	21.8564	23.0943	20.4531	17.1594	18.892	21.9174	0.714103	1	-2.47832	-0.889598
229	DNAJA2	DnaJ homolog subfamily A member 2	O60884	EGSGGGGGMDDIFSHIFGGGLFGFMGNQSR	30	2990.31	5.1934e-15	158.15	434510000	22	25.8311	26.6581	24.2127	26.2681	26.2233	26.4284	0.440038	1	0.739314	0.384888
230	DNAJB1	DnaJ homolog subfamily B member 1	P25685	GSGPSGGSGGGANGTSFSYTFHGDPHAMFAEFFGGR	36	3507.5	0.019744	53.408	26484000	3	21.588	22.9564	20.1647	21.8513	22.2599	22.3132	0.281007	1	0.571744	0.283175
231	DNAJB11	DnaJ homolog subfamily B member 11	Q9UBS4	DGHQSSHGDIFSHFFGDFGFMFGGTPR	27	2986.29	2.7661e-21	191.44	152320000	11	24.4997	25.0163	22.6481	24.9965	24.4252	24.9356	0.420308	1	0.731065	0.376568
232	DNAJB4	DnaJ homolog subfamily B member 4	Q9UDY4	YTFHGDPHATFAAFFGGSNPFEIFFGR	27	3036.4	0.00027483	71.54	4489200	1	17.752	18.2726	17.976	17.2546	20.4595	21.4631	0.605035	1	1.72556	0.69635
233	DNAJB5	DnaJ homolog subfamily B member 5	O75953	ILHIVIK	7	948.612	0.012178	76.553	3355700	1	18.8596	20.4459	19.6965	19.1996	17.9627	17.0559	0.967547	1	-1.59457	-0.808628
234	DNAJC13	DnaJ homolog subfamily C member 13	O75165	ILVDLLTLAHLHVSR	15	1699.01	0.00070071	91.207	11992000	3	19.9395	21.7565	21.4955	20.4688	21.534	17.8147	0.38019	1	-1.12465	-0.460388
235	DNAJC7	DnaJ homolog subfamily C member 7	Q99615	AVQFFVQALR	10	1177.66	4.5722e-06	151.27	10408000	2	20.6274	21.7503	20.9491	20.3283	20.8723	17.6905	0.643342	1	-1.47857	-0.660748
236	DOCK11	Dedicator of cytokinesis protein 11	Q5JSL3	FPETYHHVLHSLLLAIIPHVTIR	23	2705.52	3.1688e-06	111.83	32389000	7	21.7335	22.8144	21.2428	22.6919	22.3522	22.7213	0.617186	1	0.658209	0.392004
237	DOCK7	Dedicator of cytokinesis protein 7	Q96N67	NSLLASYIHYVFR	13	1581.83	0.00082443	90.926	14400000	2	20.9612	22.4347	19.7663	20.2742	19.905	21.7585	0.160033	1	-0.408151	-0.189199
238	DPM1	Dolichol-phosphate mannosyltransferase subunit 1	O60762	GANFLTQILLRPGASDLTGSFR	22	2333.25	9.8706e-06	104.63	14587000	2	20.5809	22.3785	19.3349	20.6793	20.109	21.9653	0.0505721	1	0.153127	0.0683574
239	DUSP3	Dual specificity protein phosphatase 3	P51452	SPTLVIAYLMMR	12	1393.75	2.0095e-06	131.44	14583000	3	20.7175	22.2993	19.8969	19.3924	20.7886	22.0092	0.0825015	1	-0.241159	-0.107963
240	DYNC1H1	Cytoplasmic dynein 1 heavy chain 1	Q14204	HVPVVYVDYPGPASLTQIYGTFNR	24	2692.36	3.9987e-11	126.51	7013300	0	18.8682	21.9139	18.173	20.1679	17.1652	20.0821	0.123952	1	-0.513308	-0.1891
241	DYNC1H1	Cytoplasmic dynein 1 heavy chain 1	Q14204	LLLIQAFRPDR	11	1340.79	0.0047879	84.882	11182000	3	18.6968	17.9566	21.7624	21.2797	21.1018	21.4314	0.701975	1	1.79899	0.759426
242	DYNC1H1	Cytoplasmic dynein 1 heavy chain 1	Q14204	QALVAIFTHLR	11	1267.74	0.0016284	88.596	21846000	6	21.164	22.9083	21.8764	20.5882	21.108	21.9091	0.542985	1	-0.781146	-0.425555
243	DYNC1H1	Cytoplasmic dynein 1 heavy chain 1	Q14204	QLIAQVMLYSQGFR	14	1652.87	9.3684e-06	117.03	6618800	1	20.1768	21.4958	16.9528	19.3325	19.8734	19.7064	0.023522	1	0.0956135	0.0373668
244	DYNC1H1	Cytoplasmic dynein 1 heavy chain 1	Q14204	QNLFTTWSHHLQQANIQFR	19	2368.18	1.2182e-06	116.35	13171000	2	20.7006	22.4233	16.4326	20.6049	20.0657	21.5461	0.18458	1	0.8867	0.292404
245	DYNC1H1	Cytoplasmic dynein 1 heavy chain 1	Q14204	SWSHYTVPAGMTVIQWVSDFSER	23	2682.25	2.5594e-06	113.51	10244000	3	19.737	22.5993	18.0301	19.2352	17.7661	21.0229	0.182199	1	-0.78072	-0.275675
246	DYNC1H1	Cytoplasmic dynein 1 heavy chain 1	Q14204	VTFVNFTVTR	10	1182.64	4.3629e-06	152.34	12067000	3	20.4434	21.9382	20.6267	20.6533	20.2071	21.0321	0.284196	1	-0.371936	-0.215283
247	DYNC1H1	Cytoplasmic dynein 1 heavy chain 1	Q14204	WQALLVQIR	9	1125.67	0.00013421	143	13344000	3	20.19	22.1995	21.2949	20.1053	20.6402	20.929	0.459714	1	-0.669928	-0.366252
248	DYNC1I2;DYNC1I1	Cytoplasmic dynein 1 intermediate chain 2;Cytoplasmic dynein 1 intermediate chain 1	Q13409;O14576	FHPNLVVGGTYSGQIVLWDNR	21	2371.21	7.2276e-06	95.5	6383100	1	19.4835	21.2599	18.5336	19.1338	19.4069	20.5061	0.0285758	1	-0.076732	-0.036498
249	DYNC2H1	Cytoplasmic dynein 2 heavy chain 1	Q8NCM8	LVYTPLTDK	9	1162.62	0.048048	59.205	45847000	2	22.9731	23.1443	22.1803	23.5623	20.6902	23.181	0.109894	1	-0.288068	-0.134094
250	EARS2	Probable glutamate--tRNA ligase, mitochondrial	Q5JPH6	HLLLYQALGWQPPHFAHLPLLLNR	24	2846.59	1.5031e-09	136.49	67531000	9	22.4719	23.9361	22.7207	22.541	23.2013	24.4554	0.189089	1	0.356369	0.185516
251	ECM29	Proteasome-associated protein ECM29 homolog	Q5VYK3	DNHSPEIQHGSLLALGFTVGR	21	2247.14	9.7188e-10	142.98	5797500	1	19.0301	21.0275	19.5	19.2931	19.5862	19.8632	0.163566	1	-0.271715	-0.148885
252	ECM29	Proteasome-associated protein ECM29 homolog	Q5VYK3	LIPALLESLSVLEPQVLNYLSLR	23	2579.49	7.9101e-06	96.633	16105000	4	21.1782	18.1545	21.2699	21.6748	21.7484	22.047	0.720662	1	1.62255	0.727654
253	EEF1A1;EEF1A1P5	Elongation factor 1-alpha 1;Putative elongation factor 1-alpha-like 3	P68104;Q5VTE0	YYVTIIDAPGHR	12	1403.72	6.4982e-07	143.24	144640000	15	23.181	25.4857	24.2808	24.3361	23.2059	25.1373	0.0347737	1	-0.0894502	-0.0432138
254	EEF1A1;EEF1A1P5;EEF1A2	Elongation factor 1-alpha 1;Putative elongation factor 1-alpha-like 3;Elongation factor 1-alpha 2	P68104;Q5VTE0;Q05639	IGGIGTVPVGR	11	1024.6	1.2585e-05	122.13	20494000	7	19.4501	22.0349	20.9837	22.3696	19.7317	22.7629	0.262827	1	0.798515	0.331067
255	EEF1E1-BLOC1S5;EEF1E1	Eukaryotic translation elongation factor 1 epsilon-1	C9J1V9;O43324	VYLTGYNFTLADILLYYGLHR	21	2504.31	9.8534e-10	142.78	152700000	11	24.227	25.5435	21.8876	23.2256	24.8117	25.2898	0.169799	1	0.556287	0.228197
256	EEF1G	Elongation factor 1-gamma	P26641	ALIAAQYSGAQVR	13	1346.73	7.2923e-06	119.68	10575000	2	19.9128	21.9336	20.8568	21.2572	20.1671	17.2048	0.43242	1	-1.35806	-0.533804
257	EEF1G	Elongation factor 1-gamma	P26641	DGWSLWYSEYR	11	1460.64	1.1776e-05	123.86	17949000	3	21.5866	22.9027	19.6698	19.8734	20.0092	21.9702	0.265245	1	-0.76874	-0.326076
258	EEF1G	Elongation factor 1-gamma	P26641	NAFASVILFGTNNSSSISGVWVFR	24	2572.31	3.2503e-09	122.34	11224000	1	21.0304	21.9778	18.3723	20.5492	19.4364	21.1758	0.0203903	1	-0.0730146	-0.0305115
259	EEF1G	Elongation factor 1-gamma	P26641	VLSAPPHFHFGQTNR	15	1706.86	0.00040791	92.935	14329000	6	20.359	22.0688	20.907	21.1087	19.9689	21.6676	0.0993081	1	-0.196548	-0.102911
260	EEF1G	Elongation factor 1-gamma	P26641	WFLTCINQPQFR	12	1608.79	4.5663e-11	192.14	29191000	7	22.4611	23.0332	21.5817	21.7388	21.6502	22.2256	0.458593	1	-0.487143	-0.293734
261	EEF2	Elongation factor 2	P13639	ALLELQLEPEELYQTFQR	18	2219.15	1.2414e-29	227.91	60268000	7	22.9512	24.7481	21.385	22.9522	22.4633	22.808	0.105252	1	-0.286884	-0.131456
262	EEF2	Elongation factor 2	P13639	AYLPVNESFGFTADLR	16	1798.89	1.0198e-11	160.15	37677000	6	22.4139	23.7843	21.4093	22.5911	20.0363	22.8315	0.251694	1	-0.716213	-0.307579
263	EEF2	Elongation factor 2	P13639	DGAGFLINLIDSPGHVDFSSEVTAALR	27	2800.4	5.1189e-29	208.37	33093000	5	21.8537	23.5651	20.0593	21.6887	20.7204	23.35	0.0246749	1	0.0936635	0.0379139
264	EEF2	Elongation factor 2	P13639	VNFTVDQIR	9	1090.58	0.00066134	119.27	8335900	2	18.8139	20.4488	19.663	20.9965	19.226	21.4719	0.483084	1	0.92285	0.454487
265	EID3;NSMCE4A	EP300-interacting inhibitor of differentiation 3;Non-structural maintenance of chromosomes element 4 homolog A	Q8N140;Q9NXX6	ILGLLQTYFR	10	1222.71	3.8235e-06	155.1	6060600	1	19.5318	20.7484	19.2134	19.1115	19.3449	20.698	0.0574396	1	-0.113082	-0.060128
266	EIF1AX;EIF1AY	Eukaryotic translation initiation factor 1A, X-chromosomal;Eukaryotic translation initiation factor 1A, Y-chromosomal	P47813;O14602	KKVWINTSDIILVGLR	16	2082.2	0.077437	15.884	2922200	0	18.8342	19.205	18.7112	18.3283	19.1953	18.9082	0.132509	1	-0.106218	-0.0710472
267	EIF1AX;EIF1AY	Eukaryotic translation initiation factor 1A, X-chromosomal;Eukaryotic translation initiation factor 1A, Y-chromosomal	P47813;O14602	VWINTSDIILVGLR	14	1597.92	9.8435e-11	161.76	24967000	4	20.8586	23.2691	21.0448	21.3871	20.9788	22.5127	0.0369147	1	-0.0980244	-0.0466786
268	EIF2A	Eukaryotic translation initiation factor 2A;Eukaryotic translation initiation factor 2A, N-terminally processed	Q9BY44	NAAYYSPHGHILVLAGFGNLR	21	2269.18	1.472e-13	158.15	42537000	7	22.1901	24.3944	21.185	21.8268	21.8443	22.4751	0.216643	1	-0.541096	-0.249182
269	EIF2AK2	Interferon-induced, double-stranded RNA-activated protein kinase	P19525	FTFQVIIDGR	10	1194.64	0.0004867	99.688	8460900	2	20.0781	21.0528	20.4304	16.8044	20.3015	21.2379	0.318642	1	-1.0725	-0.415875
270	EIF3A	Eukaryotic translation initiation factor 3 subunit A	Q14152	FLWESYR	7	999.481	0.0013755	98.133	8377000	1	20.2988	20.6956	20.5401	20.3448	20.0939	20.4306	0.653902	1	-0.221706	-0.163815
271	EIF3A	Eukaryotic translation initiation factor 3 subunit A	Q14152	LLQQVSQIYQSIEFSR	16	1938.02	5.8959e-12	160.04	11596000	2	20.1718	22.5019	19.0966	20.1102	19.2934	21.0296	0.14767	1	-0.445716	-0.191855
272	EIF3A	Eukaryotic translation initiation factor 3 subunit A	Q14152	VLLATLSIPITPER	14	1521.91	1.7025e-07	127.42	14296000	3	20.2222	22.2878	21.3993	20.6838	17.2788	21.74	0.403386	1	-1.40224	-0.524599
273	EIF3B	Eukaryotic translation initiation factor 3 subunit B	P55884	QQANTIFWSPQGQFVVLAGLR	21	2359.24	3.7175e-09	127.97	24030000	3	20.7152	23.9864	19.1257	20.9591	21.1666	20.3067	0.116228	1	-0.464903	-0.17516
274	EIF3B	Eukaryotic translation initiation factor 3 subunit B	P55884	VDNAYWLWTFQGR	13	1654.79	1.3962e-07	131.83	9619700	1	20.7587	21.8366	18.7049	19.9015	19.2549	20.9798	0.136766	1	-0.387948	-0.172627
275	EIF3E	Eukaryotic translation initiation factor 3 subunit E	P60228	WIVNLIR	7	912.555	0.0013478	104.94	7013000	1	20.0811	20.8583	20.5751	17.6875	19.925	20.4628	0.580976	1	-1.14635	-0.551238
276	EIF3F	Eukaryotic translation initiation factor 3 subunit F	O00303	LHPVILASIVDSYER	15	1710.93	0.0013658	87.083	8423800	1	19.7989	21.9887	19.7421	19.7242	17.6305	20.6158	0.441641	1	-1.18641	-0.504172
277	EIF3F	Eukaryotic translation initiation factor 3 subunit F	O00303	VSPNELILGWYATGHDITEHSVLIHEYYSR	30	3498.72	1.6351e-07	116.87	9019700	1	18.8058	22.1253	18.8499	20.2848	19.379	20.5684	0.0444098	1	0.15038	0.0638222
278	EIF3G	Eukaryotic translation initiation factor 3 subunit G	O75821	GFAFISFHR	9	1080.55	0.00041533	114.5	44877000	9	22.7038	24.1041	20.3485	22.9283	22.8512	21.5769	0.0187845	1	0.0666523	0.0280036
279	EIF3H	Eukaryotic translation initiation factor 3 subunit H	O15372	HVNIDHLHVGWYQSTYYGSFVTR	23	2778.33	4.957e-14	152.88	112230000	12	23.5574	25.6109	22.701	23.5328	23.2183	24.2483	0.115042	1	-0.289999	-0.137077
280	EIF3I	Eukaryotic translation initiation factor 3 subunit I	Q13347	FFHLAFEEEFGR	12	1527.71	4.3151e-08	162.36	14259000	2	20.4432	22.0424	20.7492	20.4111	20.3853	21.9269	0.0854981	1	-0.170497	-0.0894041
281	EIF3L	Eukaryotic translation initiation factor 3 subunit L	Q9Y262	MLGYFSLVGLLR	12	1367.76	1.7976e-05	118.18	36725000	5	21.9902	23.6837	21.0122	20.867	21.3856	23.5543	0.0921369	1	-0.293087	-0.125563
282	EIF4A1	Eukaryotic initiation factor 4A-I	P60842	LQMEAPHIIVGTPGR	15	1617.87	0.00068375	91.207	15102000	4	19.5695	21.7829	20.6099	22.1395	19.8339	21.7637	0.243745	1	0.591618	0.274082
283	EIF4A1;EIF4A2	Eukaryotic initiation factor 4A-I;Eukaryotic initiation factor 4A-II;Eukaryotic initiation factor 4A-II, N-terminally processed	P60842;Q14240	GIDVQQVSLVINYDLPTNR	19	2143.13	3.1298e-53	297.16	71443000	8	23.1992	24.9104	22.6343	22.0713	22.722	23.5688	0.417344	1	-0.793935	-0.394985
284	EIF4A1;EIF4A2	Eukaryotic initiation factor 4A-I;Eukaryotic initiation factor 4A-II;Eukaryotic initiation factor 4A-II, N-terminally processed	P60842;Q14240	VLITTDLLAR	10	1113.68	1.7022e-05	146.58	38638000	11	21.292	23.3266	22.8843	22.7952	22.0602	22.5538	0.0158441	1	-0.0312831	-0.0168678
285	EIF4A3	Eukaryotic initiation factor 4A-III;Eukaryotic initiation factor 4A-III, N-terminally processed	P38919	GLDVPQVSLIINYDLPNNR	19	2139.13	0.0027959	67.449	5909800	1	19.955	20.7528	18.8169	19.0444	19.9402	20.0925	0.0810972	1	-0.149227	-0.0806658
286	EIF4A3	Eukaryotic initiation factor 4A-III;Eukaryotic initiation factor 4A-III, N-terminally processed	P38919	VLISTDVWAR	10	1158.64	0.00029391	114.89	7221800	1	18.6884	20.824	20.0558	20.4964	19.3118	20.7167	0.156779	1	0.31892	0.162565
287	EIF4E2	Eukaryotic translation initiation factor 4E type 2	O60573	AVVPGPAEHPLQYNYTFWYSR	21	2494.21	8.5052e-07	118.52	9619200	1	20.0327	22.2019	18.3894	19.7782	19.3983	20.7704	0.0668702	1	-0.22574	-0.0949529
288	EIF5A	Eukaryotic translation initiation factor 5A-1	P63241	NDFQLIGIQDGYLSLLQDSGEVR	23	2579.29	2.8965e-06	112.45	15453000	2	20.2241	23.0197	19.781	20.8443	19.1923	21.1592	0.198234	1	-0.609657	-0.255818
289	EIF5A	Eukaryotic translation initiation factor 5A-1	P63241	RNDFQLIGIQDGYLSLLQDSGEVR	24	2735.39	7.7537e-10	142.22	31996000	6	21.7578	23.6098	19.7556	22.9774	21.1372	22.0017	0.0960227	1	0.331067	0.136057
290	ELAC2	Zinc phosphodiesterase ELAC protein 2	Q9BQ52	IQTQLNLIHPDIFPLLTSFR	20	2365.32	1.7977e-09	139.17	36829000	8	22.1434	23.6853	21.1112	21.7782	21.942	23.0717	0.0192783	1	-0.0493183	-0.0240424
291	ELAC2	Zinc phosphodiesterase ELAC protein 2	Q9BQ52	VLGTLAAVFVSHLHADHHTGLPSILLQR	28	3001.66	1.4507e-29	216.48	162880000	11	23.6264	25.6073	23.3059	24.3657	25.2239	24.72	0.317196	1	0.590007	0.300789
292	EML4	Echinoderm microtubule-associated protein-like 4	Q9HC35	SHIFFWTWSGNSLTR	15	1837.89	1.1572e-07	122.63	65077000	8	23.1911	24.6139	21.7404	22.8581	22.9282	23.3561	0.0549017	1	-0.134335	-0.0657224
293	ENO1	Alpha-enolase	P06733	LAMQEFMILPVGAANFR	17	1906.98	1.4532e-17	179.35	20050000	4	20.5035	23.0962	19.9247	21.4729	19.2757	22.2694	0.0435053	1	-0.168807	-0.0668882
294	ENO1	Alpha-enolase	P06733	LAQANGWGVMVSHR	14	1524.76	9.4814e-11	152.99	78948000	17	22.8303	24.566	23.5212	23.0654	22.915	24.0956	0.169131	1	-0.280484	-0.153583
295	ENO1	Alpha-enolase	P06733	VVIGMDVAASEFFR	14	1539.78	1.2251e-10	150.04	127060000	19	23.502	25.3778	24.1845	23.768	23.769	24.5124	0.219011	1	-0.338282	-0.187766
296	ENO1;ENO3;ENO2	Alpha-enolase;Beta-enolase;Gamma-enolase	P06733;P13929;P09104	AAVPSGASTGIYEALELR	18	1803.94	4.3512e-08	127.76	24417000	6	20.0359	22.9321	20.966	22.4133	18.5987	22.8011	0.0083295	1	-0.0402667	-0.0144349
297	EPRS	Bifunctional glutamate/proline--tRNA ligase;Glutamate--tRNA ligase;Proline--tRNA ligase	P07814	FAGGDYTTTIEAFISASGR	19	1962.93	1.4679e-25	202.13	10795000	2	19.9658	22.62	17.7432	20.1715	17.7961	20.87	0.106165	1	-0.497147	-0.172086
298	EPRS	Bifunctional glutamate/proline--tRNA ligase;Glutamate--tRNA ligase;Proline--tRNA ligase	P07814	LLSVNIR	7	813.507	0.0013545	103.28	17749000	7	20.5124	21.848	21.9295	20.9229	21.2468	21.9343	0.0384108	1	-0.0619761	-0.035462
299	EPRS	Bifunctional glutamate/proline--tRNA ligase;Glutamate--tRNA ligase;Proline--tRNA ligase	P07814	YYTLFGR	7	918.46	0.00074287	132.94	13045000	3	20.7704	21.281	20.7685	21.2067	21.1296	21.0739	0.490392	1	0.196772	0.143126
300	ERBB2	Receptor tyrosine-protein kinase erbB-2	P04626	ILHNGAYSLTLQGLGISWLGLR	22	2381.32	0.00023109	87.772	4704300	1	19.4919	21.0925	17.3371	19.0211	19.3265	19.0469	0.05549	1	-0.175644	-0.0766199
301	ERCC4	DNA repair endonuclease XPF	Q92889	LTLLTLHFPR	10	1209.72	0.00027956	99.653	7772800	2	19.6024	21.0669	20.2516	19.6224	19.6498	20.8591	0.169041	1	-0.263219	-0.147214
302	ERO1L	ERO1-like protein alpha	Q96HE7	LISGLHASINVHLSAR	16	1686.95	4.1062e-08	137.52	81858000	10	22.1523	24.4386	23.8468	21.7796	23.8829	24.2751	0.05563	1	-0.166688	-0.0746064
303	ESD	S-formylglutathione hydrolase	P10768	LQEGYDHSYYFIATFITDHIR	21	2588.23	3.4808e-05	94.188	119610000	6	23.6323	25.9938	21.705	23.746	23.2068	23.5885	0.0738971	1	-0.263274	-0.107439
304	ETF1	Eukaryotic peptide chain release factor subunit 1	P62495	FGFIVIDGSGALFGTLQGNTR	21	2169.12	1.1057e-13	167.55	22549000	4	21.8081	23.0149	20.3209	21.4091	20.5869	22.1739	0.13219	1	-0.324691	-0.154332
305	ETF1	Eukaryotic peptide chain release factor subunit 1	P62495	LSVLGAITSVQQR	13	1370.79	0.0011493	89.189	4435900	1	18.2603	20.8902	19.7026	18.7868	18.0885	19.1808	0.492857	1	-0.932309	-0.460464
306	EXOC5	Exocyst complex component 5	O00471	NILHSFVQLR	10	1225.69	0.0022975	87.913	8502300	3	20.6383	21.3514	20.9386	21.0591	18.2989	17.3081	0.849682	1	-2.08742	-0.891618
307	EXOSC10	Exosome component 10	Q01780	HLNTQQLTAFQLLFAWR	17	2086.11	3.6119e-12	160.81	13676000	3	21.0386	22.0518	18.9479	20.4308	21.2762	21.3726	0.132899	1	0.347094	0.160576
308	FABP5	Fatty acid-binding protein, epidermal	Q01469	ELGVGIALR	9	926.555	0.00076096	111.65	6917000	1	19.1345	20.2564	20.3808	20.0777	19.64	20.7797	0.177712	1	0.241919	0.140897
309	FADS1	Fatty acid desaturase 1	O60427	SAFNDWFSGHLNFQIEHHLFPTMPR	25	3027.42	0.0034875	66.501	17462000	3	20.188	22.2547	20.7158	20.7239	21.6999	22.07	0.237134	1	0.4451	0.2296
310	FAM118B	Protein FAM118B	Q9BPY3	LSVLHIHGVYTNPSGIVLHPAGYQNVLR	28	3053.66	0.020905	54.259	7026700	1	19.3099	21.2995	19.4211	19.8758	19.1031	20.581	0.0709639	1	-0.156864	-0.0794726
311	FANCI	Fanconi anemia group I protein	Q9NVI1	FVSSLLTALFR	11	1252.72	1.9691e-15	219.54	313350000	14	25.4077	26.4628	25.2735	24.8028	25.8958	25.3939	0.288305	1	-0.350496	-0.207256
312	FASN	Fatty acid synthase;[Acyl-carrier-protein] S-acetyltransferase;[Acyl-carrier-protein] S-malonyltransferase;3-oxoacyl-[acyl-carrier-protein] synthase;3-oxoacyl-[acyl-carrier-protein] reductase;3-hydroxyacyl-[acyl-carrier-protein] dehydratase;Enoyl-[acyl-carrier-protein] reductase;Oleoyl-[acyl-carrier-protein] hydrolase	P49327	DLVEAVAHILGIR	13	1404.81	4.2023e-18	209.1	30252000	6	21.1665	23.6888	19.9067	21.6785	21.3011	22.8294	0.104481	1	0.349003	0.145227
313	FASN	Fatty acid synthase;[Acyl-carrier-protein] S-acetyltransferase;[Acyl-carrier-protein] S-malonyltransferase;3-oxoacyl-[acyl-carrier-protein] synthase;3-oxoacyl-[acyl-carrier-protein] reductase;3-hydroxyacyl-[acyl-carrier-protein] dehydratase;Enoyl-[acyl-carrier-protein] reductase;Oleoyl-[acyl-carrier-protein] hydrolase	P49327	EGGFLLLHTLLR	12	1367.79	0.0016819	90.827	61081000	7	22.5053	24.8925	22.8532	21.8674	18.8135	23.5309	0.570498	1	-2.01304	-0.726928
314	FASN	Fatty acid synthase;[Acyl-carrier-protein] S-acetyltransferase;[Acyl-carrier-protein] S-malonyltransferase;3-oxoacyl-[acyl-carrier-protein] synthase;3-oxoacyl-[acyl-carrier-protein] reductase;3-hydroxyacyl-[acyl-carrier-protein] dehydratase;Enoyl-[acyl-carrier-protein] reductase;Oleoyl-[acyl-carrier-protein] hydrolase	P49327	ELNLVLSVR	9	1041.62	0.00060947	122.52	13131000	5	19.352	21.6677	21.505	20.8214	20.442	21.4559	0.0271125	1	0.0648632	0.0323874
315	FASN	Fatty acid synthase;[Acyl-carrier-protein] S-acetyltransferase;[Acyl-carrier-protein] S-malonyltransferase;3-oxoacyl-[acyl-carrier-protein] synthase;3-oxoacyl-[acyl-carrier-protein] reductase;3-hydroxyacyl-[acyl-carrier-protein] dehydratase;Enoyl-[acyl-carrier-protein] reductase;Oleoyl-[acyl-carrier-protein] hydrolase	P49327	GGNVGINSFGFGGSNVHIILRPNTQPPPAPAPHATLPR	38	3857.02	3.5947e-13	143.23	11577000	1	19.6171	22.0633	20.1067	20.8594	20.1699	21.0554	0.0425735	1	0.0991828	0.0497394
316	FASN	Fatty acid synthase;[Acyl-carrier-protein] S-acetyltransferase;[Acyl-carrier-protein] S-malonyltransferase;3-oxoacyl-[acyl-carrier-protein] synthase;3-oxoacyl-[acyl-carrier-protein] reductase;3-hydroxyacyl-[acyl-carrier-protein] dehydratase;Enoyl-[acyl-carrier-protein] reductase;Oleoyl-[acyl-carrier-protein] hydrolase	P49327	GHPLGDIVAFLTSTEPQYGQGILSQDAWESLFSR	34	3718.83	8.8245e-13	143.09	30168000	5	22.8538	22.8441	20.5697	21.655	21.4686	22.7991	0.0453756	1	-0.114995	-0.0556563
317	FASN	Fatty acid synthase;[Acyl-carrier-protein] S-acetyltransferase;[Acyl-carrier-protein] S-malonyltransferase;3-oxoacyl-[acyl-carrier-protein] synthase;3-oxoacyl-[acyl-carrier-protein] reductase;3-hydroxyacyl-[acyl-carrier-protein] dehydratase;Enoyl-[acyl-carrier-protein] reductase;Oleoyl-[acyl-carrier-protein] hydrolase	P49327	GLIAEAAQLGPVGGVFNLAVVLR	23	2263.31	1.9487e-09	135.38	15265000	5	21.5887	21.8984	19.605	20.6569	21.0527	21.77	0.0565634	1	0.129157	0.0649409
318	FASN	Fatty acid synthase;[Acyl-carrier-protein] S-acetyltransferase;[Acyl-carrier-protein] S-malonyltransferase;3-oxoacyl-[acyl-carrier-protein] synthase;3-oxoacyl-[acyl-carrier-protein] reductase;3-hydroxyacyl-[acyl-carrier-protein] dehydratase;Enoyl-[acyl-carrier-protein] reductase;Oleoyl-[acyl-carrier-protein] hydrolase	P49327	GLVQALQTKVTQQGLKMVVPGLDGAQIPR	29	3272.8	0.00019661	69.248	16771000	3	20.7342	21.5485	20.3075	21.6185	21.3853	22.1651	0.931854	1	0.85954	0.526942
319	FASN	Fatty acid synthase;[Acyl-carrier-protein] S-acetyltransferase;[Acyl-carrier-protein] S-malonyltransferase;3-oxoacyl-[acyl-carrier-protein] synthase;3-oxoacyl-[acyl-carrier-protein] reductase;3-hydroxyacyl-[acyl-carrier-protein] dehydratase;Enoyl-[acyl-carrier-protein] reductase;Oleoyl-[acyl-carrier-protein] hydrolase	P49327	GTHTGVWVGVSGSETSEALSR	21	2116.02	6.0199e-06	99.86	6893300	1	18.9077	20.0139	20.4491	19.6943	18.6651	21.3361	0.0408116	1	0.108314	0.0515042
320	FASN	Fatty acid synthase;[Acyl-carrier-protein] S-acetyltransferase;[Acyl-carrier-protein] S-malonyltransferase;3-oxoacyl-[acyl-carrier-protein] synthase;3-oxoacyl-[acyl-carrier-protein] reductase;3-hydroxyacyl-[acyl-carrier-protein] dehydratase;Enoyl-[acyl-carrier-protein] reductase;Oleoyl-[acyl-carrier-protein] hydrolase	P49327	HSQDLAFLSMLNDIAAVPATAMPFR	25	2715.35	3.0353e-06	106.58	35981000	7	21.2078	23.8598	20.6805	22.5444	21.4244	22.8806	0.124636	1	0.367112	0.161173
321	FASN	Fatty acid synthase;[Acyl-carrier-protein] S-acetyltransferase;[Acyl-carrier-protein] S-malonyltransferase;3-oxoacyl-[acyl-carrier-protein] synthase;3-oxoacyl-[acyl-carrier-protein] reductase;3-hydroxyacyl-[acyl-carrier-protein] dehydratase;Enoyl-[acyl-carrier-protein] reductase;Oleoyl-[acyl-carrier-protein] hydrolase	P49327	IPGLLSPHPLLQLSYTATDR	20	2191.2	8.1444e-14	168.2	61501000	7	22.8124	23.9349	23.1134	22.753	22.7086	23.8481	0.135042	1	-0.183624	-0.107924
322	FASN	Fatty acid synthase;[Acyl-carrier-protein] S-acetyltransferase;[Acyl-carrier-protein] S-malonyltransferase;3-oxoacyl-[acyl-carrier-protein] synthase;3-oxoacyl-[acyl-carrier-protein] reductase;3-hydroxyacyl-[acyl-carrier-protein] dehydratase;Enoyl-[acyl-carrier-protein] reductase;Oleoyl-[acyl-carrier-protein] hydrolase	P49327	LNSVQSSERPLFLVHPIEGSTTVFHSLASR	30	3307.73	4.2412e-08	120.33	9730400	1	19.8694	21.8771	20.4239	20.2649	19.7069	20.4152	0.394685	1	-0.594453	-0.32374
323	FASN	Fatty acid synthase;[Acyl-carrier-protein] S-acetyltransferase;[Acyl-carrier-protein] S-malonyltransferase;3-oxoacyl-[acyl-carrier-protein] synthase;3-oxoacyl-[acyl-carrier-protein] reductase;3-hydroxyacyl-[acyl-carrier-protein] dehydratase;Enoyl-[acyl-carrier-protein] reductase;Oleoyl-[acyl-carrier-protein] hydrolase	P49327	LSFFFDFR	8	1077.53	1.7088e-05	154.31	127230000	11	24.1363	24.6686	24.1002	22.4293	23.6458	25.4349	0.200872	1	-0.465008	-0.222277
324	FASN	Fatty acid synthase;[Acyl-carrier-protein] S-acetyltransferase;[Acyl-carrier-protein] S-malonyltransferase;3-oxoacyl-[acyl-carrier-protein] synthase;3-oxoacyl-[acyl-carrier-protein] reductase;3-hydroxyacyl-[acyl-carrier-protein] dehydratase;Enoyl-[acyl-carrier-protein] reductase;Oleoyl-[acyl-carrier-protein] hydrolase	P49327	NVTFHGVLLDAFFNESSADWR	21	2424.15	3.3084e-06	109.65	10475000	2	20.2847	21.9379	18.5852	20.1229	19.193	21.5384	0.0042812	1	0.0154858	0.00649582
325	FASN	Fatty acid synthase;[Acyl-carrier-protein] S-acetyltransferase;[Acyl-carrier-protein] S-malonyltransferase;3-oxoacyl-[acyl-carrier-protein] synthase;3-oxoacyl-[acyl-carrier-protein] reductase;3-hydroxyacyl-[acyl-carrier-protein] dehydratase;Enoyl-[acyl-carrier-protein] reductase;Oleoyl-[acyl-carrier-protein] hydrolase	P49327	PLFLVHPIEGSTTVFHSLASR	21	2307.24	2.9565e-06	111.18	8123300	2	19.7011	20.854	20.1734	18.0676	18.9865	21.6967	0.22624	1	-0.659196	-0.281758
326	FASN	Fatty acid synthase;[Acyl-carrier-protein] S-acetyltransferase;[Acyl-carrier-protein] S-malonyltransferase;3-oxoacyl-[acyl-carrier-protein] synthase;3-oxoacyl-[acyl-carrier-protein] reductase;3-hydroxyacyl-[acyl-carrier-protein] dehydratase;Enoyl-[acyl-carrier-protein] reductase;Oleoyl-[acyl-carrier-protein] hydrolase	P49327	TLLEGSGLESIISIIHSSLAEPR	23	2421.31	1.5855e-28	211.03	64420000	8	22.6242	24.2656	20.9131	23.9693	21.8703	23.8907	0.209675	1	0.642418	0.269147
327	FASN	Fatty acid synthase;[Acyl-carrier-protein] S-acetyltransferase;[Acyl-carrier-protein] S-malonyltransferase;3-oxoacyl-[acyl-carrier-protein] synthase;3-oxoacyl-[acyl-carrier-protein] reductase;3-hydroxyacyl-[acyl-carrier-protein] dehydratase;Enoyl-[acyl-carrier-protein] reductase;Oleoyl-[acyl-carrier-protein] hydrolase	P49327	VLLSLEHGLWAPNLHFHSPNPEIPALLDGR	30	3341.77	1.1328e-21	190.28	94705000	8	23.0933	24.5121	22.1998	23.6611	23.6344	24.8729	0.427439	1	0.787757	0.396366
328	FASN	Fatty acid synthase;[Acyl-carrier-protein] S-acetyltransferase;[Acyl-carrier-protein] S-malonyltransferase;3-oxoacyl-[acyl-carrier-protein] synthase;3-oxoacyl-[acyl-carrier-protein] reductase;3-hydroxyacyl-[acyl-carrier-protein] dehydratase;Enoyl-[acyl-carrier-protein] reductase;Oleoyl-[acyl-carrier-protein] hydrolase	P49327	VTVAGGVHISGLHTESAPR	19	1887	4.248e-09	129.11	64260000	12	21.9704	24.1591	23.4358	22.7625	22.4696	24.0315	0.0427043	1	-0.100554	-0.0502102
329	FASN	Fatty acid synthase;[Acyl-carrier-protein] S-acetyltransferase;[Acyl-carrier-protein] S-malonyltransferase;3-oxoacyl-[acyl-carrier-protein] synthase;3-oxoacyl-[acyl-carrier-protein] reductase;3-hydroxyacyl-[acyl-carrier-protein] dehydratase;Enoyl-[acyl-carrier-protein] reductase;Oleoyl-[acyl-carrier-protein] hydrolase	P49327	WLSTSIPEAQWHSSLAR	17	1967.99	0.01947	61.226	11530000	3	20.2761	21.9307	19.5762	21.0515	20.3425	20.9159	0.0851569	1	0.175646	0.090957
330	FBL	rRNA 2-O-methyltransferase fibrillarin	P22087	VLYLGAASGTTVSHVSDIVGPDGLVYAVEFSHR	33	3415.74	0.029983	47.96	16455000	2	20.2565	22.8954	19.7937	20.6059	20.9692	21.439	0.00754414	1	0.0228653	0.0104136
331	FBL;FBLL1	rRNA 2-O-methyltransferase fibrillarin;rRNA/tRNA 2-O-methyltransferase fibrillarin-like protein 1	P22087;A6NHQ2	IVALNAHTFLR	11	1253.72	0.0038892	78.653	10117000	1	19.6561	21.394	20.4883	20.7473	20.1402	21.0344	0.0795546	1	0.127848	0.0723586
332	FDPS	Farnesyl pyrophosphate synthase	P14324	GLTVVVAFR	9	960.576	7.9438e-14	219.78	64195000	10	21.9005	24.1208	23.3024	22.5801	23.219	23.9005	0.057604	1	0.125277	0.0641769
333	FERMT2	Fermitin family homolog 2	Q96AC1	FIQAWQSLPEFGITHFIAR	19	2260.18	0.00083211	70.335	13549000	1	20.7155	22.728	18.6113	20.3818	20.8178	20.2708	0.0560492	1	-0.19481	-0.0811657
334	FIS1	Mitochondrial fission 1 protein	Q9Y3D6	DYVFYLAVGNYR	12	1478.72	9.6341e-07	144.09	9689300	2	20.2933	21.6341	19.2443	19.3858	20.0921	21.3782	0.0395273	1	-0.105233	-0.0499996
335	FKBP10	Peptidyl-prolyl cis-trans isomerase FKBP10	Q96AY3	IPGSAVLIFNVHVIDFHNPADVVEIR	26	2870.54	0.00024835	79.762	32401000	4	22.263	23.8259	20.5168	20.4688	22.0507	22.3108	0.204895	1	-0.5918	-0.255563
336	FKBP10	Peptidyl-prolyl cis-trans isomerase FKBP10	Q96AY3	NTLVAIVVGVGR	12	1196.72	5.2455e-08	133.23	19052000	1	20.6109	22.5594	21.5796	20.5969	21.4876	21.7832	0.16645	1	-0.294062	-0.157592
337	FLII	Protein flightless-1 homolog	Q13045	LVHLQTLVLNGNPLLHAQLR	20	2248.32	3.7654e-10	146.3	49144000	8	22.302	23.6445	23.1339	22.3594	23.1276	22.7615	0.243474	1	-0.277306	-0.168092
338	FLNA	Filamin-A	P21333	GAGSYTIMVLFADQATPTSPIR	22	2295.16	4.0702e-10	145.71	12649000	3	20.6409	22.9086	18.7708	19.526	19.0458	20.4143	0.368399	1	-1.11134	-0.451452
339	FLNA	Filamin-A	P21333	HTAMVSWGGVSIPNSPFR	18	1941.95	0.055279	41.088	2933000	0	19.2647	20.2258	17.9828	18.592	18.6895	17.6784	0.505519	1	-0.837817	-0.435204
340	FLNB	Filamin-B	O75369	HTIAVVWGGVNIPHSPYR	18	2002.05	2.2704e-12	156.67	36717000	7	22.2585	23.5975	22.2982	21.8627	15.5689	23.2516	0.445146	1	-2.49033	-0.690945
341	FN3KRP	Ketosamine-3-kinase	Q9HA64	LQLYQLFHYLNHWNHFGSGYR	21	2692.31	1.3246e-35	248.55	236820000	13	25.0713	26.0206	24.0396	24.5451	24.9935	25.7987	0.0341198	1	0.0685997	0.0364989
342	FN3KRP	Ketosamine-3-kinase	Q9HA64	RLQLYQLFHYLNHWNHFGSGYR	22	2848.41	1.7067e-19	187.06	25067000	5	21.5185	23.1674	19.1506	21.5657	22.6172	21.2667	0.163746	1	0.537689	0.220764
343	FSCN1	Fascin	Q16658	WSVHIAMHPQVNIYSVTR	18	2137.09	1.3065e-08	137.44	169950000	29	24.0007	25.4084	24.5578	24.168	24.6373	25.2167	0.0119122	1	0.0183824	0.0107535
344	FUBP3;FUBP1	Far upstream element-binding protein 3;Far upstream element-binding protein 1	Q96I24;Q96AE4	FAVGIVIGR	9	930.565	2.6269e-06	170.17	140680000	13	22.9214	25.0353	24.6094	24.0404	24.0925	25.1647	0.119774	1	0.243852	0.125555
345	G3BP1	Ras GTPase-activating protein-binding protein 1	Q13283	FYVHNDIFR	9	1209.59	0.010173	68.735	10083000	3	20.1499	20.7494	20.6175	21.1541	20.2171	20.9288	0.318389	1	0.261049	0.16997
346	G3BP1	Ras GTPase-activating protein-binding protein 1	Q13283	HVDAHATLNDGVVVQVMGLLSNNNQALR	28	2984.52	1.0044e-06	102.95	39679000	7	21.7102	24.0114	22.2031	22.3311	20.5075	22.8843	0.296984	1	-0.733936	-0.333232
347	G6PD	Glucose-6-phosphate 1-dehydrogenase	P11413	IFGPIWNR	8	1001.54	0.049885	60.358	5352900	0	19.6571	19.6773	20.1192	20.0022	19.6783	19.3315	0.235808	1	-0.147192	-0.101832
348	G6PD	Glucose-6-phosphate 1-dehydrogenase	P11413	IYPTIWWLFR	10	1393.75	5.6945e-05	141.39	112530000	12	23.3109	25.3586	22.0296	23.3124	23.7495	24.853	0.139845	1	0.405263	0.178344
349	GAA	Lysosomal alpha-glucosidase;76 kDa lysosomal alpha-glucosidase;70 kDa lysosomal alpha-glucosidase	P10253	YALLPHLYTLFHQAHVAGETVAR	23	2606.38	2.581e-09	131.65	8122200	2	19.8285	20.9753	20.3356	19.8272	19.0534	21.1532	0.204102	1	-0.368522	-0.194255
350	GANAB	Neutral alpha-glucosidase AB	Q14697	DVHNIYGLYVHMATADGLR	19	2144.05	1.9084e-06	113.17	53933000	8	22.5583	24.8955	21.6176	21.6986	21.6078	22.6823	0.424439	1	-1.02756	-0.460094
351	GANAB	Neutral alpha-glucosidase AB	Q14697	FSFSGNTLVSSSADPEGHFETPIWIER	27	3009.41	3.5895e-15	170.16	12538000	2	19.8491	22.7537	18.0206	20.306	19.1104	21.3426	0.00977791	1	0.0451724	0.0165983
352	GANAB	Neutral alpha-glucosidase AB	Q14697	HHGPQTLYLPVTLSSIPVFQR	21	2389.29	2.5675e-06	112.55	16223000	3	20.8637	22.4044	20.5072	21.2506	20.2651	21.7463	0.083302	1	-0.171113	-0.0888013
353	GANAB	Neutral alpha-glucosidase AB	Q14697	LSFQHDPETSVLVLR	15	1739.92	4.3661e-05	99.069	7411000	1	18.7997	20.989	19.8973	20.6284	18.9893	20.7435	0.0947537	1	0.225066	0.109855
354	GANAB	Neutral alpha-glucosidase AB	Q14697	LYNLDVFQYELYNPMALYGSVPVLLAHNPHR	31	3645.84	1.3438e-29	204.92	201410000	14	24.0337	26.2219	23.0222	24.3209	24.3362	25.7211	0.12787	1	0.366812	0.162868
355	GANAB	Neutral alpha-glucosidase AB	Q14697	QYASLTGTQALPPLFSLGYHQSR	23	2534.29	4.6895e-05	93.73	10083000	2	20.2581	21.4469	20.0262	20.0924	19.8013	21.4532	0.0663821	1	-0.128132	-0.0684132
356	GANAB	Neutral alpha-glucosidase AB	Q14697	WYQMGAYQPFFR	12	1592.72	4.7438e-11	186.76	114240000	18	24.1725	25.4152	22.0421	24.088	23.9797	23.5034	0.00640911	1	-0.019556	-0.0088845
357	GANAB	Neutral alpha-glucosidase AB	Q14697	YSLLPFWYTLLYQAHR	16	2070.07	1.0845e-29	247.79	2464100000	20	28.4291	29.6531	26.6966	28.4039	28.3892	28.7227	0.102161	1	0.245675	0.118997
358	GAPDH	Glyceraldehyde-3-phosphate dehydrogenase	P04406	LISWYDNEFGYSNR	14	1762.8	1.0632e-32	265.36	81824000	12	23.2949	25.015	22.2586	23.4046	22.6068	23.85	0.0955253	1	-0.235699	-0.113195
359	GAPDH	Glyceraldehyde-3-phosphate dehydrogenase	P04406	LVINGNPITIFQER	14	1612.89	1.8354e-08	145.91	29893000	5	21.1808	23.0662	22.1435	21.8721	19.9798	23.1376	0.164839	1	-0.467016	-0.20602
360	GAPDH	Glyceraldehyde-3-phosphate dehydrogenase	P04406	VPTANVSVVDLTCR	14	1529.79	1.1961e-13	184.03	23012000	7	20.5018	22.4145	21.5016	22.5477	20.623	22.3161	0.163358	1	0.356274	0.176336
361	GAPDH;GAPDHS	Glyceraldehyde-3-phosphate dehydrogenase;Glyceraldehyde-3-phosphate dehydrogenase, testis-specific	P04406;O14556	LTGMAFR	7	794.411	0.0013404	106.76	8593400	2	19.8084	20.7895	20.3645	20.496	20.083	20.8751	0.169774	1	0.163893	0.104743
362	GARS	Glycine--tRNA ligase	P41250	IMYTVFEHTFHVR	13	1678.83	1.823e-10	149.26	40246000	10	22.3604	24.223	21.6632	22.2181	20.52	22.411	0.458432	1	-1.03248	-0.475368
363	GART	Trifunctional purine biosynthetic protein adenosine-3;Phosphoribosylamine--glycine ligase;Phosphoribosylformylglycinamidine cyclo-ligase;Phosphoribosylglycinamide formyltransferase	P22102	AFAHITGGGLLENIPR	16	1664.9	0.071502	25.59	3724800	0	18.3601	20.3383	18.9356	19.5566	18.7314	19.3991	0.0090982	1	0.017683	0.00961235
364	GART	Trifunctional purine biosynthetic protein adenosine-3;Phosphoribosylamine--glycine ligase;Phosphoribosylformylglycinamidine cyclo-ligase;Phosphoribosylglycinamide formyltransferase	P22102	ITEGDVVVGIASSGLHSNGFSLVR	24	2413.26	0.0096723	62.611	6059500	1	18.7917	20.7586	18.8642	19.7122	19.4469	20.7642	0.264479	1	0.502927	0.256701
365	GBAS	Protein NipSnap homolog 2	O75323	FRQDGNEAVGGFFSQIGQLYMVHHLWAYR	29	3425.65	2.7218e-21	180.88	25308000	5	20.8817	23.1044	17.0081	21.9876	23.1405	19.8621	0.262545	1	1.33202	0.413216
366	GBAS	Protein NipSnap homolog 2	O75323	QDGNEAVGGFFSQIGQLYMVHHLWAYR	27	3122.48	4.1457e-29	211.92	79827000	15	23.7212	24.4685	22.698	23.1934	23.1832	24.0074	0.103993	1	-0.167896	-0.0942555
367	GCN1L1	Translational activator GCN1	Q92616	ALGTLVSHVTLR	12	1265.75	0.0021025	85.288	8498000	2	19.4141	21.1219	20.4816	20.7056	19.7614	20.472	0.0151228	1	-0.0261739	-0.0147594
368	GCN1L1	Translational activator GCN1	Q92616	FVHFIDAPSLALIMPIVQR	19	2166.2	2.1197e-07	120.66	7392400	1	19.8137	21.5028	18.4212	19.6993	19.4143	20.608	0.00182032	1	-0.00535901	-0.00247996
369	GCN1L1	Translational activator GCN1	Q92616	LLTWVIGTGSPR	12	1298.73	5.921e-06	121.5	7412100	2	19.8442	20.8639	20.1685	19.5851	19.7024	20.7343	0.236991	1	-0.284905	-0.170294
370	GCN1L1	Translational activator GCN1	Q92616	NIVSLLLSMLGHDEDNTR	18	2026.02	6.9209e-10	147.56	139820000	18	24.1422	25.1131	24.1895	24.0665	24.5722	24.478	0.112604	1	-0.109378	-0.0704694
371	GDAP1	Ganglioside-induced differentiation-associated protein 1	Q8TB36	VLGHVNNILISAVLPTAFR	19	2033.18	3.2974e-06	107.03	9971000	2	20.4712	21.2924	19.8512	19.8543	20.1351	21.4696	0.026786	1	-0.0519066	-0.0280577
372	GEMIN5	Gem-associated protein 5	Q8TEQ6	GVVFCYWFNR	10	1346.62	3.0476e-05	144.83	11466000	2	20.8044	21.8676	19.3909	19.5305	20.3007	21.5509	0.0867769	1	-0.226874	-0.106615
373	GEMIN5	Gem-associated protein 5	Q8TEQ6	LYEFWWSLSR	10	1385.68	0.00022767	120.12	11533000	2	20.7067	21.5956	19.3912	19.5001	19.5443	22.0883	0.0606643	1	-0.186925	-0.0823977
374	GID8	Glucose-induced degradation protein 8 homolog	Q9NWU2	YLYFHLQQQHLIELIR	16	2113.15	8.2915e-12	154.6	45319000	7	22.6869	23.5755	22.201	21.6908	22.4522	23.531	0.146322	1	-0.263131	-0.140821
375	GINS3	DNA replication complex GINS protein PSF3	Q9BRX5	MGPHFYGFGSQLLHFDSPENADISQSLLQTFIGR	34	3808.83	3.9636e-17	162.49	21300000	2	20.2434	22.8509	19.7326	21.1396	20.2335	22.9458	0.147823	1	0.497363	0.202825
376	GLDC	Glycine dehydrogenase (decarboxylating), mitochondrial	P23378	FGVPLGYGGPHAAFFAVR	18	1861.96	0.0016538	69.331	4679800	1	19.8783	21.0072	18.3667	19.0253	19.4912	18.3239	0.407717	1	-0.803906	-0.394697
377	GLMN	Glomulin	Q92990	VLHSALFTFDLIESVLAR	18	2030.12	2.128e-12	157.8	22043000	5	21.5606	22.9078	20.02	21.1944	21.4012	22.209	0.0402962	1	0.10544	0.0504537
378	GLUD2;GLUD1	Glutamate dehydrogenase 2, mitochondrial;Glutamate dehydrogenase 1, mitochondrial	P49448;P00367	TFVVQGFGNVGLHSMR	16	1747.88	0.00057717	91.207	10806000	2	20.2163	21.1732	20.294	20.5124	19.7423	21.7652	0.0583848	1	0.112118	0.0601318
379	GNAI3	Guanine nucleotide-binding protein G(k) subunit alpha	P08754	VVVYSNTIQSIIAIIR	16	1788.05	0.0005788	91.207	4654200	1	19.0723	21.0391	18.48	18.4379	18.7577	19.5808	0.289386	1	-0.605026	-0.295849
380	GNB2L1	Guanine nucleotide-binding protein subunit beta-2-like 1;Guanine nucleotide-binding protein subunit beta-2-like 1, N-terminally processed	P63244	DVLSVAFSSDNR	12	1308.63	1.112e-10	179.1	8977400	4	19.8375	21.9783	20.3863	17.8315	17.9943	21.2754	0.58724	1	-1.70032	-0.682166
381	GNB2L1	Guanine nucleotide-binding protein subunit beta-2-like 1;Guanine nucleotide-binding protein subunit beta-2-like 1, N-terminally processed	P63244	GHNGWVTQIATTPQFPDMILSASR	24	2626.3	0.00045452	76.889	21278000	3	20.9452	23.0683	20.658	20.8906	20.855	22.2444	0.0912465	1	-0.227188	-0.108854
382	GNB2L1	Guanine nucleotide-binding protein subunit beta-2-like 1;Guanine nucleotide-binding protein subunit beta-2-like 1, N-terminally processed	P63244	HLYTLDGGDIINALCFSPNR	20	2275.11	1.7701e-07	120.9	7266800	1	19.4177	21.2005	19.1292	20.8285	18.9448	20.2144	0.0316807	1	0.0801347	0.0390379
383	GNB2L1	Guanine nucleotide-binding protein subunit beta-2-like 1;Guanine nucleotide-binding protein subunit beta-2-like 1, N-terminally processed	P63244	VWQVTIGTR	9	1058.59	1.4544e-05	149.65	68671000	12	22.6868	23.7272	23.6235	23.2648	23.0948	23.938	0.0724963	1	0.086703	0.0535454
384	GNPAT	Dihydroxyacetone phosphate acyltransferase	O15228	ILSENFGSIHVYFGDPVSLR	20	2249.15	5.6139e-06	99.34	11846000	1	20.7396	22.2186	19.9438	20.0087	20.2024	20.891	0.346265	1	-0.599948	-0.312758
385	GOLGB1	Golgin subfamily B member 1	Q14789	GALLLSSIELEELKAENEK	19	2313.21	0.062427	67.153	72227000	1	22.0423	18.8327	23.8034	24.2874	23.4896	24.3249	0.769715	1	2.47447	0.923185
386	GOT1	Aspartate aminotransferase, cytoplasmic	P17174	FLFPFFDSAYQGFASGNLER	20	2312.09	0.023875	55.453	9555300	1	20.654	22.3666	18.7915	20.9628	17.6735	18.3826	0.483494	1	-1.59775	-0.605927
387	GOT2	Aspartate aminotransferase, mitochondrial	P00505	FVTVQTISGTGALR	14	1448.8	1.3854e-07	131.28	14866000	4	19.7801	21.8153	21.3614	21.3759	20.7547	21.5594	0.136004	1	0.244409	0.131181
388	GPD2	Glycerol-3-phosphate dehydrogenase, mitochondrial	P43304	GTILVGGGALATVLGLSQFAHYR	23	2300.26	7.3047e-06	98.543	16220000	2	21.0973	22.6771	19.6353	20.5173	20.2941	21.8072	0.0944979	1	-0.263693	-0.120029
389	GRWD1	Glutamate-rich WD repeat-containing protein 1	Q9BQ67	ELHWHPQCPGLLVSTALSGFTIFR	24	2765.41	0.025355	52.79	7490400	1	20.2959	21.4492	18.1752	19.5081	20.4014	19.8007	0.0235718	1	-0.0701014	-0.0319489
390	GRWD1	Glutamate-rich WD repeat-containing protein 1	Q9BQ67	PIFSFAGHMGEGFALDWSPR	20	2221.04	3.4589e-09	130.85	11619000	2	20.7605	21.5406	19.2492	20.1874	20.913	21.5169	0.173913	1	0.35563	0.180096
391	GSKIP	GSK3-beta interaction protein	Q9P0R6	VVGYAFDQVDDHLQTPYHETVYSLLDTLSPAYR	33	3811.84	7.9518e-05	75.82	10025000	1	19.7124	21.2482	18.931	21.0346	19.9706	21.5166	0.462098	1	0.876689	0.434074
392	GSPT2	Eukaryotic peptide chain release factor GTP-binding subunit ERF3B	Q8IYD1	PFVPNVHAAEFVPSFLR	17	1926.02	0.001127	84.14	7201100	1	20.0359	21.758	18.9916	20.1423	19.4697	17.4158	0.471883	1	-1.25258	-0.53296
393	GSPT2;GSPT1	Eukaryotic peptide chain release factor GTP-binding subunit ERF3B;Eukaryotic peptide chain release factor GTP-binding subunit ERF3A	Q8IYD1;P15170	SFVPNMIGGASQADLAVLVISAR	23	2315.23	6.824e-06	99.999	9232100	1	19.4762	22.2696	18.4	20.4072	19.4657	19.9113	0.0343915	1	-0.120529	-0.0505411
394	GSTP1	Glutathione S-transferase P	P09211	FQDGDLTLYQSNTILR	16	1882.94	1.1863e-07	130.1	6251400	1	18.625	21.2069	18.661	20.0162	18.1455	20.6642	0.0328428	1	0.110974	0.047415
395	GSTP1	Glutathione S-transferase P	P09211	PPYTVVYFPVR	11	1336.72	2.529e-10	180.44	16458000	4	21.0027	23.3681	19.698	21.3536	17.8401	18.0568	0.657924	1	-2.2728	-0.822293
396	GTF2H4	General transcription factor IIH subunit 4	Q92759	IWHTQLLPGGLQGLILNPIFR	21	2385.37	5.103e-06	103.17	46570000	7	22.4818	23.4737	21.2873	22.9997	23.1557	23.0648	0.447304	1	0.659093	0.359439
397	GTPBP1	GTP-binding protein 1	O00178	LNPQASWEFEAEILVLHHPTTISPR	25	2884.49	4.8762e-06	98.121	9220200	2	19.7392	22.0634	18.5715	19.7974	19.0832	21.0061	0.0475868	1	-0.162509	-0.0685781
398	GUF1	Translation factor GUF1, mitochondrial	Q8N442	LGFLGLLHMEVFNQR	15	1772.94	0.00047568	92.457	10727000	2	20.8385	22.1605	19.9408	19.1173	18.0232	21.3037	0.57514	1	-1.49856	-0.634987
399	HACL1	2-hydroxyacyl-CoA lyase 1	Q9UJ83	LNWILHFGLPPR	12	1461.82	0.069038	29.807	2921700	0	19.3478	19.7783	19.3197	17.6185	19.4189	16.5836	0.89077	1	-1.60824	-0.787748
400	HADH	Hydroxyacyl-coenzyme A dehydrogenase, mitochondrial	Q16836	FAAEHTIFASNTSSLQITSIANATTR	26	2751.38	2.5728e-06	104.33	6239000	1	18.4353	21.4782	18.8828	19.6379	18.9155	20.1576	0.00922454	1	-0.028436	-0.0128401
401	HAT1	Histone acetyltransferase type B catalytic subunit	O14929	ILLYYIAGSLSTMFR	15	1746.94	2.6322e-05	107.99	15596000	3	20.992	22.0091	20.2992	19.6516	21.0597	22.2507	0.0426747	1	-0.112728	-0.0536688
402	HDAC1;HDAC2	Histone deacetylase 1;Histone deacetylase 2	Q13547;Q92769	MTHNLLLNYGLYR	13	1606.83	1.1931e-07	123.84	32829000	8	22.0417	23.4311	22.1114	22.0432	21.0269	22.5666	0.435037	1	-0.649181	-0.352969
403	HEATR1	HEAT repeat-containing protein 1;HEAT repeat-containing protein 1, N-terminally processed	Q9H583	LLETVLGYISAVAQSMER	18	1979.04	0.0010933	78.078	20756000	3	21.1856	22.0263	20.7859	21.4105	21.7448	22.5139	0.495954	1	0.55718	0.329648
404	HEATR5B	HEAT repeat-containing protein 5B	Q9P2D3	SFATFLSHVLDLVSHPR	17	1925.02	4.1001e-08	131.48	80025000	12	23.5596	24.3451	22.8846	22.1455	24.0472	23.9875	0.0964374	1	-0.203064	-0.103951
405	HELLS	Lymphoid-specific helicase	Q9NRZ9	EQNVLHMLHQILTPFLLR	18	2201.21	2.1428e-13	172.97	199780000	29	24.7512	25.8434	23.2111	24.8995	25.6131	24.1798	0.124516	1	0.29555	0.142887
406	HELLS	Lymphoid-specific helicase	Q9NRZ9	EREQNVLHMLHQILTPFLLR	20	2486.36	9.4313e-19	174.82	68076000	15	22.5547	24.3706	20.012	23.779	24.3732	21.5364	0.235507	1	0.917113	0.335818
407	HGS	Hepatocyte growth factor-regulated tyrosine kinase substrate	O14964	ILYLIQAWAHAFR	13	1600.89	2.2144e-11	171.62	213690000	12	25.1992	26.1041	23.4865	23.8097	25.5346	24.7378	0.0918868	1	-0.235894	-0.111526
408	HIBCH	3-hydroxyisobutyryl-CoA hydrolase, mitochondrial	Q6NVY1	LGYFLALTGFR	11	1256.69	9.6642e-06	128.36	30658000	5	21.8497	23.4643	21.0852	20.7288	21.602	22.9603	0.143384	1	-0.369343	-0.171338
409	HIBCH	3-hydroxyisobutyryl-CoA hydrolase, mitochondrial	Q6NVY1	PYVALIHGITMGGGVGLSVHGQFR	24	2465.3	1.9591e-09	132.45	26549000	8	21.6165	23.0458	21.6275	18.3003	22.5542	22.3313	0.285625	1	-1.03466	-0.388749
410	HINT1	Histidine triad nucleotide-binding protein 1	P49773	MVVNEGSDGGQSVYHVHLHVLGGR	24	2546.24	3.3075e-21	196.89	104230000	18	23.0058	25.1812	23.7843	23.648	23.2507	24.2671	0.141782	1	-0.268498	-0.141185
411	HINT2	Histidine triad nucleotide-binding protein 2, mitochondrial	Q9BX68	LGAQSVYHLHIHVLGGR	17	1856.02	1.5099e-06	120.3	87876000	13	22.8685	24.7059	23.7123	22.888	23.4909	24.2212	0.127957	1	-0.228879	-0.123309
412	HIST1H2BL;HIST1H2BM;HIST1H2BN;HIST1H2BH;HIST3H2BB;HIST2H2BF;HIST2H2BE;HIST1H2BC;HIST1H2BD;H2BFS;HIST1H2BB;HIST1H2BO;HIST1H2BJ;HIST1H2BK;HIST1H2BA	Histone H2B type 1-L;Histone H2B type 1-M;Histone H2B type 1-N;Histone H2B type 1-H;Histone H2B type 3-B;Histone H2B type 2-F;Histone H2B type 2-E;Histone H2B type 1-C/E/F/G/I;Histone H2B type 1-D;Histone H2B type F-S;Histone H2B type 1-B;Histone H2B type 1-O;Histone H2B type 1-J;Histone H2B type 1-K;Histone H2B type 1-A	A0A2R8Y619;Q99880;Q99879;Q99877;Q93079;Q8N257;Q5QNW6;Q16778;P62807;P58876;P57053;P33778;P23527;P06899;O60814;Q96A08	LLLPGELAK	9	1066.64	0.062983	54.611	5199000	1	19.3667	21.2925	18.5429	19.2809	19.8355	17.2465	0.346364	1	-0.946411	-0.405705
413	HLTF	Helicase-like transcription factor	Q14527	SDVHLNFYVYYGPDR	15	1843.85	0.06749	30.107	2607000	0	19.3259	20.3548	19.0059	16.3326	17.5016	18.5603	1.2916	1	-2.09737	-1.06942
414	HLTF	Helicase-like transcription factor	Q14527	TLTAIAVILTNFHDGRPLPIER	22	2446.37	3.3237e-09	134.06	21125000	4	21.3362	23.4689	19.5817	19.6247	20.566	21.8275	0.240884	1	-0.789544	-0.31678
415	HLTF	Helicase-like transcription factor	Q14527	YFNEGTVLAHYADVLGLLLR	20	2263.2	5.1311e-09	122.57	14091000	2	20.0924	22.2956	19.4356	20.7112	20.7759	21.7812	0.198925	1	0.481543	0.225898
416	HMGCS1	Hydroxymethylglutaryl-CoA synthase, cytoplasmic	Q01581	LREDTHHLVNYIPQGSIDSLFEGTWYLVR	29	3457.74	1.2673e-10	143.08	5803500	1	18.4334	21.4713	17.1358	20.1653	19.4899	19.2646	0.181669	1	0.626446	0.249291
417	HNRNPA0	Heterogeneous nuclear ribonucleoprotein A0	Q13151	LFIGGLNVQTSESGLR	16	1689.9	1.2614e-11	156.71	6007900	1	18.871	20.957	19.7194	19.6336	19.4886	20.0434	0.0709485	1	-0.127288	-0.0696309
418	HNRNPA1	Heterogeneous nuclear ribonucleoprotein A1;Heterogeneous nuclear ribonucleoprotein A1, N-terminally processed	P09651;A0A2R8Y4L2	GFGFVTYATVEEVDAAMNAR	20	2147	1.8888e-13	161.48	27817000	3	21.6822	23.9795	20.6483	21.0264	20.0409	21.5421	0.499626	1	-1.23352	-0.541392
419	HNRNPA1;HNRNPA1L2	Heterogeneous nuclear ribonucleoprotein A1;Heterogeneous nuclear ribonucleoprotein A1, N-terminally processed;Heterogeneous nuclear ribonucleoprotein A1-like 2	P09651;Q32P51	LFIGGLSFETTDESLR	16	1783.9	3.1661e-18	199.43	61170000	8	22.2999	24.6752	22.3391	22.6915	22.0009	23.6253	0.133648	1	-0.332165	-0.157011
420	HNRNPA2B1	Heterogeneous nuclear ribonucleoproteins A2/B1	P22626	LFIGGLSFETTEESLR	16	1797.91	1.0583e-17	195.25	45651000	5	21.7094	24.5675	21.319	22.2181	21.2011	22.8296	0.148078	1	-0.449038	-0.192822
421	HNRNPA3	Heterogeneous nuclear ribonucleoprotein A3	P51991	LFIGGLSFETTDDSLR	16	1769.88	2.7692e-09	147.71	9594000	2	19.9039	21.462	20.3518	19.4625	18.5971	21.8049	0.227129	1	-0.617713	-0.272815
422	HNRNPC	Heterogeneous nuclear ribonucleoproteins C1/C2	P07910	GFAFVQYVNER	11	1328.65	4.6846e-06	138.98	17469000	5	20.8625	22.9796	20.5216	21.0152	20.2483	21.2077	0.313367	1	-0.63084	-0.311868
423	HNRNPH1	Heterogeneous nuclear ribonucleoprotein H;Heterogeneous nuclear ribonucleoprotein H, N-terminally processed	P31943	YVELFLNSTAGASGGAYEHR	20	2141.02	3.2952e-09	131.71	20596000	5	20.9682	22.3317	21.4117	21.6728	21.013	22.2582	0.0492762	1	0.0774263	0.0445218
424	HNRNPM	Heterogeneous nuclear ribonucleoprotein M	P52272	GNFGGSFAGSFGGAGGHAPGVAR	23	2033.95	1.4145e-05	94.837	14731000	3	20.5411	21.3381	20.6538	21.6819	20.3285	22.01	0.361798	1	0.495821	0.279858
425	HNRNPU	Heterogeneous nuclear ribonucleoprotein U	Q00839	DRLSASSLTMESFAFLWAGGR	21	2301.12	6.4088e-06	102.98	8865000	1	18.3647	22.5157	17.9577	20.2769	19.3135	19.2154	0.00235226	1	-0.0107683	-0.00399546
426	HNRNPU	Heterogeneous nuclear ribonucleoprotein U	Q00839	LSASSLTMESFAFLWAGGR	19	2029.99	1.3527e-13	167.44	36988000	4	21.7573	23.8909	20.3364	21.4175	21.0547	23.4659	0.00396908	1	-0.0154889	-0.00625343
427	HNRNPU	Heterogeneous nuclear ribonucleoprotein U	Q00839	PWSQHYHQGYY	11	1464.62	0.0028106	83.397	25534000	6	21.9197	22.1286	22.0455	21.4648	21.7475	22.5727	0.110228	1	-0.102919	-0.0669242
428	HNRNPU	Heterogeneous nuclear ribonucleoprotein U	Q00839	SSGPTSLFAVTVAPPGAR	18	1713.9	0.00037455	91.914	6855600	1	19.5903	21.4092	20.2296	20.1477	19.6123	16.4372	0.587465	1	-1.67733	-0.677811
429	HPRT1	Hypoxanthine-guanine phosphoribosyltransferase	P00492	FVVGYALDYNEYFR	14	1754.83	9.2449e-06	119.03	17655000	2	20.851	23.2029	19.0853	21.0689	17.5838	21.6765	0.207551	1	-0.936639	-0.317942
430	HPRT1	Hypoxanthine-guanine phosphoribosyltransferase	P00492	TMQTLLSLVR	10	1160.66	0.017719	63.216	3673100	0	18.5173	20.3495	19.3422	19.0351	18.6021	18.4659	0.55911	1	-0.701958	-0.399552
431	HS2ST1	Heparan sulfate 2-O-sulfotransferase 1	Q7LGA3	LVSYYYFLR	9	1222.64	0.00073169	113.89	15101000	3	20.9822	22.5679	20.2601	20.1793	20.6597	21.3715	0.280722	1	-0.533215	-0.271422
432	HSD17B10	3-hydroxyacyl-CoA dehydrogenase type-2	Q99714	GLVAVITGGASGLGLATAER	20	1812.01	7.3433e-26	210.14	18358000	4	20.4093	22.559	21.0477	20.8768	20.7224	22.2428	0.0242514	1	-0.0579796	-0.0289928
433	HSD17B10	3-hydroxyacyl-CoA dehydrogenase type-2	Q99714	VLDVNLMGTFNVIR	14	1589.86	9.4976e-15	138.99	20080000	3	20.2392	21.3645	21.4568	21.3364	21.2415	22.956	0.534306	1	0.824439	0.438477
434	HSDL1	Inactive hydroxysteroid dehydrogenase-like protein 1	Q3SXM5	GIFVQSLIPFYVATSMTAPSNFLHR	25	2795.45	0.00038183	76.237	11843000	2	20.1555	22.0241	18.5687	20.74	20.9241	21.121	0.270652	1	0.67893	0.307955
435	HSF1	Heat shock factor protein 1	Q00613	LIQFLISLVQSNR	13	1529.89	1.2864e-10	164.43	46671000	9	22.4047	23.9428	21.6977	22.0248	22.9727	23.1166	0.0101386	1	0.0229562	0.0117966
436	HSP90AA1	Heat shock protein HSP 90-alpha	P07900	ALLFVPR	7	814.507	0.0099446	80.377	10008000	3	19.4339	20.6688	20.2661	21.2821	20.0567	21.3811	0.630266	1	0.783661	0.445258
437	HSP90AA1	Heat shock protein HSP 90-alpha	P07900	HLEINPDHSIIETLR	15	1785.94	1.7105e-19	220.76	23975000	6	19.6564	22.45	21.3409	22.7165	19.478	22.7676	0.137376	1	0.504965	0.197424
438	HSP90AA1;HSP90AA2P;HSP90AA4P;HSP90AB3P;HSP90AB1	Heat shock protein HSP 90-alpha;Heat shock protein HSP 90-alpha A2;Putative heat shock protein HSP 90-alpha A4;Putative heat shock protein HSP 90-beta-3;Heat shock protein HSP 90-beta	P07900;Q14568;Q58FG1;Q58FF7;P08238	HFSVEGQLEFR	11	1347.66	2.009e-21	233.45	309430000	25	24.6024	26.1245	25.2043	25.759	24.8127	26.356	0.203259	1	0.332188	0.181458
439	HSP90AA1;HSP90AA2P;HSP90AB1	Heat shock protein HSP 90-alpha;Heat shock protein HSP 90-alpha A2;Heat shock protein HSP 90-beta	P07900;Q14568;P08238	HNDDEQYAWESSAGGSFTVR	20	2254.95	5.0063e-09	123.19	28294000	7	21.3916	22.7868	21.3761	22.5434	20.6768	22.8942	0.0790992	1	0.186649	0.0918542
440	HSP90AA1;HSP90AB1	Heat shock protein HSP 90-alpha;Heat shock protein HSP 90-beta	P07900;P08238	GVVDSEDLPLNISR	14	1512.78	1.341e-24	232.14	32247000	7	19.5013	22.6932	21.5022	23.4216	19.7302	23.2017	0.228923	1	0.885644	0.326156
441	HSP90AB1	Heat shock protein HSP 90-beta	P08238	ALLFIPR	7	828.522	0.0013459	105.42	16181000	8	20.4486	21.6264	21.1766	21.9235	20.7973	21.6723	0.322592	1	0.380478	0.225933
442	HSP90AB1	Heat shock protein HSP 90-beta	P08238	HLEINPDHPIVETLR	15	1781.94	1.8572e-14	186.95	21151000	6	19.0959	21.9444	20.8297	22.5327	19.2379	22.9326	0.262642	1	0.944424	0.358514
443	HSP90AB1	Heat shock protein HSP 90-beta	P08238	YHTSQSGDEMTSLSEYVSR	19	2175.94	2.9662e-06	108.49	19299000	4	20.0211	22.2204	20.5336	22.3814	19.4852	22.4255	0.161244	1	0.505672	0.212642
444	HSPA1B;HSPA1A	Heat shock 70 kDa protein 1B;Heat shock 70 kDa protein 1A	P0DMV9;P0DMV8	AQIHDLVLVGGSTR	14	1464.8	0.00226	82.483	22982000	7	19.6084	22.7105	21.3622	22.0188	19.9476	22.8119	0.10647	1	0.365704	0.149931
445	HSPA1B;HSPA1A	Heat shock 70 kDa protein 1B;Heat shock 70 kDa protein 1A	P0DMV9;P0DMV8	EIAEAYLGYPVTNAVITVPAYFNDSQR	27	3000.49	1.8709e-14	151.18	42705000	7	21.9734	24.2386	20.1182	22.8104	21.1559	22.925	0.0485273	1	0.187045	0.0741829
446	HSPA1B;HSPA1A	Heat shock 70 kDa protein 1B;Heat shock 70 kDa protein 1A	P0DMV9;P0DMV8	LLQDFFNGR	9	1108.57	1.0077e-05	157.34	15416000	5	20.6818	22.2852	21.6098	17.9421	16.5712	22.3706	0.638934	1	-2.5643	-0.851746
447	HSPA1B;HSPA1A	Heat shock 70 kDa protein 1B;Heat shock 70 kDa protein 1A	P0DMV9;P0DMV8	TLSSSTQASLEIDSLFEGIDFYTSITR	27	2980.46	8.5989e-16	173.59	15145000	3	21.3562	21.8249	18.2633	20.3347	19.6077	22.5891	0.0900046	1	0.362417	0.137637
448	HSPA1B;HSPA1A;HSPA1L	Heat shock 70 kDa protein 1B;Heat shock 70 kDa protein 1A;Heat shock 70 kDa protein 1-like	P0DMV9;P0DMV8;P34931	DAGVIAGLNVLR	12	1196.69	5.2024e-08	166.16	40906000	10	21.0619	23.5097	22.4624	23.005	21.6454	23.1483	0.107559	1	0.254878	0.123991
449	HSPA1B;HSPA1A;HSPA1L	Heat shock 70 kDa protein 1B;Heat shock 70 kDa protein 1A;Heat shock 70 kDa protein 1-like	P0DMV9;P0DMV8;P34931	QTQIFTTYSDNQPGVLIQVYEGER	24	2785.36	5.0777e-29	221.14	38401000	6	21.7078	24.2896	20.3321	21.8737	21.4187	22.6328	0.0376909	1	-0.134771	-0.0558561
450	HSPA1B;HSPA1A;HSPA1L;HSPA6;HSPA7	Heat shock 70 kDa protein 1B;Heat shock 70 kDa protein 1A;Heat shock 70 kDa protein 1-like;Heat shock 70 kDa protein 6;Putative heat shock 70 kDa protein 7	P0DMV9;P0DMV8;P34931;P17066;P48741	ATAGDTHLGGEDFDNR	16	1674.72	9.0747e-08	124.09	8174900	2	17.3217	20.249	18.9512	21.3593	17.7162	21.6768	0.389329	1	1.41015	0.517115
451	HSPA1B;HSPA1A;HSPA1L;HSPA6;HSPA7;HSPA8;HSPA2	Heat shock 70 kDa protein 1B;Heat shock 70 kDa protein 1A;Heat shock 70 kDa protein 1-like;Heat shock 70 kDa protein 6;Putative heat shock 70 kDa protein 7;Heat shock cognate 71 kDa protein;Heat shock-related 70 kDa protein 2	P0DMV9;P0DMV8;P34931;P17066;P48741;P11142;P54652	TTPSYVAFTDTER	13	1486.69	5.7166e-05	106.29	25802000	6	19.9941	22.2349	21.013	22.8465	20.0915	23.1089	0.331378	1	0.934945	0.39578
452	HSPA1B;HSPA1A;HSPA6	Heat shock 70 kDa protein 1B;Heat shock 70 kDa protein 1A;Heat shock 70 kDa protein 6	P0DMV9;P0DMV8;P17066	IINEPTAAAIAYGLDR	16	1686.89	8.4758e-12	162.6	36514000	7	20.8576	23.4685	21.641	23.2721	19.5881	23.072	0.00266726	1	-0.0116285	-0.00443092
453	HSPA8	Heat shock cognate 71 kDa protein	P11142	DAGTIAGLNVLR	12	1198.67	8.6017e-08	160.59	13262000	4	18.6567	21.626	20.283	22.0821	18.692	21.7277	0.178114	1	0.645353	0.250489
454	HSPA8	Heat shock cognate 71 kDa protein	P11142	QTQTFTTYSDNQPGVLIQVYEGER	24	2773.32	3.884e-10	145.04	16548000	3	20.6589	22.7674	19.3233	21.2656	19.9845	21.7548	0.0251454	1	0.0850811	0.0364689
455	HSPA8	Heat shock cognate 71 kDa protein	P11142	SQIHDIVLVGGSTR	14	1480.8	0.0011659	88.706	14390000	3	19.2756	22.0428	20.4342	21.4715	19.1006	22.1167	0.0912453	1	0.312037	0.129026
456	HSPA8	Heat shock cognate 71 kDa protein	P11142	TVTNAVVTVPAYFNDSQR	18	1980.99	1.3086e-08	137.45	17716000	7	17.0049	22.6849	21.1492	22.064	17.3107	21.9203	0.0220039	1	0.151991	0.0433604
457	HSPA8;HSPA2	Heat shock cognate 71 kDa protein;Heat shock-related 70 kDa protein 2	P11142;P54652	ARFEELNADLFR	12	1479.75	5.4769e-06	124.12	12118000	3	18.859	21.9148	19.1509	22.156	17.585	21.2145	0.0707439	1	0.343602	0.118486
458	HSPA8;HSPA2	Heat shock cognate 71 kDa protein;Heat shock-related 70 kDa protein 2	P11142;P54652	STAGDTHLGGEDFDNR	16	1690.72	0.026348	59.728	5349600	1	17.17	20.0829	18.4858	20.4747	17.1395	21.0176	0.260253	1	0.964379	0.360354
459	HSPA9	Stress-70 protein, mitochondrial	P38646	LLGQFTLIGIPPAPR	15	1591.94	3.7427e-11	162.38	13522000	3	20.8533	22.3417	20.1724	20.558	19.4631	21.4498	0.298235	1	-0.632205	-0.306835
460	HSPD1	60 kDa heat shock protein, mitochondrial	P10809	ISSIQSIVPALEIANAHR	18	1918.06	0.00056275	86.455	20295000	4	20.5301	22.5102	21.4164	21.6387	20.2183	22.3972	0.0263998	1	-0.067536	-0.0328206
461	HSPD1	60 kDa heat shock protein, mitochondrial	P10809	LVQDVANNTNEEAGDGTTTATVLAR	25	2559.24	1.9801e-09	128.38	21667000	4	20.2187	22.2411	21.2004	22.4724	19.4635	22.6403	0.0917818	1	0.305339	0.127981
462	HSPE1-MOB4;HSPE1	10 kDa heat shock protein, mitochondrial	S4R3N1;P61604	FLPLFDR	7	906.496	0.0013781	97.473	13632000	4	20.1785	21.3786	21.177	21.4469	20.6068	21.464	0.217906	1	0.261207	0.156731
463	HUWE1	E3 ubiquitin-protein ligase HUWE1	Q7Z6Z7	HVLDTLIQLAKVFPSHFTQQR	21	2591.4	1.4792e-09	140.06	22611000	6	21.4876	22.1836	21.1597	21.403	22.4818	21.9077	0.300107	1	0.320533	0.196178
464	HUWE1	E3 ubiquitin-protein ligase HUWE1	Q7Z6Z7	LFGHSSTSALSAILR	15	1558.85	0.06889	28.546	2247400	0	17.9898	19.9635	17.6682	18.1003	17.3281	18.246	0.348888	1	-0.649036	-0.329124
465	HUWE1	E3 ubiquitin-protein ligase HUWE1	Q7Z6Z7	VLQEGLLQLDSILSSLEPLHRPIESPGGSVLLR	33	3564.99	0.068992	34.617	10315000	0	20.5944	21.2059	19.2616	21.2773	20.3679	20.7714	0.289025	1	0.451581	0.246576
466	HUWE1	E3 ubiquitin-protein ligase HUWE1	Q7Z6Z7	VLQVIIQLR	9	1080.7	8.0021e-06	160.91	16600000	5	20.1829	22.2987	21.4691	20.4317	21.621	21.3687	0.0877731	1	-0.176407	-0.0921683
467	HYOU1	Hypoxia up-regulated protein 1	Q9Y4L1	YSHDFNFHINYGDLGFLGPEDLR	23	2725.26	9.0355e-05	92.336	21431000	3	21.1109	23.0397	19.7284	21.7855	20.8337	21.9989	0.0852076	1	0.246357	0.11073
468	IARS	Isoleucine--tRNA ligase, cytoplasmic	P41252	DTLSIHYLMLPR	12	1457.77	0.015804	64.199	7829500	2	19.4291	21.9657	19.9278	19.7742	18.5657	19.5084	0.604648	1	-1.15805	-0.562661
469	IARS	Isoleucine--tRNA ligase, cytoplasmic	P41252	FVDILTNWYVR	11	1424.75	5.5223e-15	204.7	20163000	2	21.0562	22.6952	20.6408	20.359	20.6124	22.656	0.0948756	1	-0.254925	-0.118009
470	IDH1	Isocitrate dehydrogenase [NADP] cytoplasmic	O75874	LIFPYVELDLHSYDLGIENR	20	2405.23	3.1989e-06	108.92	9544200	1	20.0667	22.1233	18.6211	19.7026	20.3664	20.2756	0.051538	1	-0.155463	-0.0694921
471	IGF2R	Cation-independent mannose-6-phosphate receptor	P11717	HFFINICHR	9	1242.61	0.0003794	119.29	8417000	2	19.9909	20.7841	20.5425	19.5485	20.2804	20.9329	0.148805	1	-0.185261	-0.111357
472	IGSF3	Immunoglobulin superfamily member 3	O75054	LRLSQAQGNLSVLETR	16	1783.99	0.067437	37.092	1833000	0	18.4993	19.6904	19.2336	17.6574	17.4924	17.6676	1.92096	1	-1.53529	-0.98951
473	ILF2	Interleukin enhancer-binding factor 2	Q12905	IRFPGFEPLTPWILDLLGHYAVMNNPTR	28	3266.71	3.3658e-29	201.98	573550000	18	26.9918	27.6777	23.4836	26.0978	26.1816	25.97	0.00810752	1	0.0320714	0.0128267
474	ILF3	Interleukin enhancer-binding factor 3	Q12906	EPPLSLTIHLTSPVVR	16	1758	1.8249e-05	110.38	22197000	9	21.0318	22.6757	22.0734	21.0524	21.39	21.9377	0.356619	1	-0.466929	-0.267571
475	INTS3	Integrator complex subunit 3	Q68E01	IGYHLLYYLR	10	1309.72	0.0024664	87.308	16322000	6	21.1641	22.7002	19.8406	20.9093	20.7824	21.2221	0.114467	1	-0.263748	-0.129509
476	IPO4	Importin-4	Q8TEX9	AGLLVLAVLSDGAGDHIR	18	1775.99	1.4848e-08	136.01	31582000	5	21.3372	23.8444	21.762	20.6967	21.6409	22.3497	0.341703	1	-0.752115	-0.356331
477	IPO4	Importin-4	Q8TEX9	LLGLLFPLLAR	11	1224.8	2.5327e-07	157.54	137350000	12	23.7811	25.6858	23.2791	23.275	24.1984	24.8082	0.0626868	1	-0.154787	-0.0752158
478	IPO4	Importin-4	Q8TEX9	QVVMAVLEALTGVLR	15	1597.92	2.8133e-11	158.52	49961000	8	22.2603	23.9103	22.4193	22.3616	23.279	22.9308	0.00344463	1	-0.00621096	-0.00347055
479	IPO5	Importin-5	O00410	ITFLLQAIR	9	1073.66	7.2494e-09	181.49	40855000	7	22.0915	23.5185	22.5124	21.9906	22.5496	22.9461	0.156928	1	-0.212005	-0.124271
480	IPO5	Importin-5	O00410	SELLMIIQMETQSSMR	16	1895.92	0.01035	78.069	4284300	1	18.7304	21.3592	18.614	18.7841	19.3797	19.532	0.133798	1	-0.335903	-0.158078
481	IPO7	Importin-7	O95373	EYITPFIRPVMQALLHIIR	19	2309.31	4.8816e-13	159.34	314230000	40	25.3163	26.9119	21.9364	25.9054	25.9266	23.8891	0.116856	1	0.518836	0.184316
482	IPO9	Importin-9	Q96P70	HMVSSMQQILPIVWNTLTESAAFYVR	26	3020.53	1.1422e-14	164.66	32521000	5	21.3138	22.2011	21.3983	22.7422	21.6932	23.5071	0.779897	1	1.00977	0.561931
483	IQGAP1	Ras GTPase-activating-like protein IQGAP1	P46940	FMDSVIFTLYNYASNQR	17	2067.97	2.3386e-05	100.41	10500000	1	20.2557	21.2079	18.9663	19.2944	19.6065	22.2162	0.0708655	1	0.22904	0.0982444
484	IRAK1	Interleukin-1 receptor-associated kinase 1	P51617	VADLVHILTHLQLLR	15	1740.04	2.9355e-11	157.86	43527000	9	21.6514	23.5467	23.0656	22.107	22.7526	22.8607	0.106147	1	-0.181166	-0.0997846
485	IRS4	Insulin receptor substrate 4	O14654	SWSSYFSLPNPFR	13	1586.75	1.8967e-07	125.97	19004000	5	21.8278	22.5539	20.0209	21.558	20.8306	21.5678	0.0654588	1	-0.148767	-0.074696
486	IRS4	Insulin receptor substrate 4	O14654	SYSISIGAHLLTLLSAR	17	1801.01	9.224e-06	113.29	33412000	5	22.3119	23.3704	21.6486	20.9269	22.8816	22.0535	0.257495	1	-0.489659	-0.250276
487	ISYNA1	Inositol-3-phosphate synthase 1	Q9NPH2	LGVMLVGWGGNNGSTLTAAVLANR	24	2370.25	0.00018595	87.772	18841000	3	21.1985	22.9365	19.904	20.8896	20.6497	21.872	0.0771436	1	-0.209255	-0.0971114
488	IVD	Isovaleryl-CoA dehydrogenase, mitochondrial	P26440	LVLAGGPLGLMQAVLDHTIPYLHVR	25	2682.5	2.3229e-49	274.95	265660000	20	25.5759	24.8093	24.6885	25.7868	25.338	25.8119	0.912729	1	0.620973	0.409171
489	KARS	Lysine--tRNA ligase	Q15046	PFITYHNELDMNLYMR	16	2055.95	0.0036849	68.972	10127000	2	19.8558	21.4245	19.7841	19.7135	19.3829	21.9015	0.00762611	1	-0.0221539	-0.0102829
490	KAT2A	Histone acetyltransferase KAT2A	Q92830	VLLWLVGLQNVFSHQLPR	18	2118.21	1.0493e-12	166.35	32313000	5	22.073	23.4908	20.4059	21.5392	22.4343	22.5187	0.0641142	1	0.174149	0.0811893
491	KAT2B	Histone acetyltransferase KAT2B	Q92831	ILMWLVGLQNVFSHQLPR	18	2150.18	0.00014684	92.977	5626500	1	19.6215	21.6612	17.8171	19.5274	17.4693	18.9794	0.338964	1	-1.04123	-0.421631
492	KDELR1	ER lumen protein-retaining receptor 1	P24390	TLYLFNWIWR	10	1410.74	0.00037547	108.46	6361600	1	19.7127	20.766	18.2386	18.4097	19.1629	21.2388	0.00922383	1	0.031367	0.0135244
493	KIF2A	Kinesin-like protein KIF2A	O00139	SHAVFQIILR	10	1182.69	0.00026505	101.65	8699400	3	19.6507	20.9947	20.6579	19.8741	19.8815	21.0727	0.100191	1	-0.158313	-0.0895863
494	KIF5B	Kinesin-1 heavy chain	P33176	SLSALGNVISALAEGSTYVPYR	22	2267.18	6.2883e-06	100.67	5206600	1	19.4241	20.8545	18.0061	20.056	18.1694	20.2581	0.0209025	1	0.0663153	0.0293745
495	KLC1;KLC2	Kinesin light chain 1;Kinesin light chain 2	E7EVH7;Q07866;Q9H0B6	TSGHDHPDVATMLNILALVYR	21	2322.18	6.9004e-06	97.284	12245000	1	19.8822	22.7372	18.9253	20.5454	19.7641	20.3846	0.0859836	1	-0.283497	-0.119645
496	KPNA2	Importin subunit alpha-1	P52292	AVVDGGAIPAFISLLASPHAHISEQAVWALGNIAGDGSVFR	41	4113.14	8.8467e-19	164.26	75200000	9	22.288	24.0878	21.0119	24.2526	22.9665	24.3878	0.63345	1	1.4064	0.639099
497	KPNA2	Importin subunit alpha-1	P52292	FVSFLGR	7	824.454	0.0013285	109.7	6055400	2	19.4097	20.4992	20.1274	20.5893	20.138	18.0411	0.190965	1	-0.422672	-0.206414
498	KPNA5;KPNA6;KPNA1	Importin subunit alpha-6;Importin subunit alpha-7;Importin subunit alpha-5;Importin subunit alpha-5, N-terminally processed	O15131;O60684;P52294	IVQVALNGLENILR	14	1550.91	1.4817e-14	199.09	53853000	11	22.4511	23.6248	23.4521	22.5297	22.9587	23.1795	0.27951	1	-0.28669	-0.177782
499	KPNB1	Importin subunit beta-1	Q14974	LQQVLQMESHIQSTSDR	17	1998.98	3.6157e-08	133.45	3899400	1	18.9745	21.2384	19.7961	16.8233	18.5171	18.5292	1.10468	1	-2.04646	-0.988092
500	LAMTOR4	Ragulator complex protein LAMTOR4;Ragulator complex protein LAMTOR4, N-terminally processed	Q0VGL1	LSVVFGEHTLLVTVSGQR	18	1941.07	1.017e-18	198.07	54511000	7	22.3617	23.6392	23.1938	21.6844	23.0607	23.7737	0.113773	1	-0.22527	-0.117423
501	LANCL2	LanC-like protein 2	Q9NS86	IPDRPYSLFEGMAGAIHFLSDVLGPETSR	29	3174.58	3.9743e-16	173.68	25473000	4	18.7439	22.1244	21.9891	23.1784	20.5739	22.3228	0.328111	1	1.07257	0.421482
502	LARP1	La-related protein 1	Q6PKG0	MDADGFLPITLIASFHR	17	1902.97	2.4443e-05	99.451	13138000	2	20.6369	22.3495	20.5014	19.9904	19.8064	21.3752	0.426	1	-0.771928	-0.391076
503	LARP1;LARP1B	La-related protein 1;La-related protein 1B	Q6PKG0;Q659C4	FWSFFLR	7	1001.51	3.4942e-06	170.96	234190000	11	25.0968	26.3497	23.8857	24.3353	24.7453	25.5165	0.112224	1	-0.244977	-0.123035
504	LARS	Leucine--tRNA ligase, cytoplasmic	Q9P2J5	WQFLTLR	7	962.534	2.203e-05	151.17	11703000	4	20.7115	21.4047	21.0481	20.3403	20.6631	20.9696	0.666022	1	-0.397098	-0.270076
505	LARS	Leucine--tRNA ligase, cytoplasmic	Q9P2J5	YFVTFPYPYMNGR	13	1653.76	0.0031156	80.688	10704000	1	20.9714	21.6376	19.3706	20.5166	20.133	20.9722	0.0576721	1	-0.11926	-0.0622723
506	LAS1L	Ribosomal biogenesis protein LAS1L	Q9Y4W2	GSLPLSAHGIVVAWLSR	17	1761.99	0.00047041	90.654	14597000	2	20.1739	22.6515	19.8007	19.1492	20.5388	21.8606	0.109257	1	-0.359197	-0.150374
507	LBR	Lamin-B receptor	Q14739	NLLVSGWWGFVR	12	1432.76	2.0416e-06	138.66	12540000	2	20.6438	22.2401	19.4321	19.9967	19.6654	21.6813	0.114853	1	-0.324179	-0.145696
508	LCMT1	Leucine carboxyl methyltransferase 1	Q9UIC8	FAVSIGYWHDPYIQHFVR	18	2234.11	9.6714e-06	106.36	83650000	12	23.4243	24.8951	22.5813	23.1892	23.564	23.6266	0.0895689	1	-0.173644	-0.0918879
509	LCP1	Plastin-2	P13796	LNLAFIANLFNR	12	1404.79	4.8203e-22	242.2	25211000	5	21.7013	23.1136	20.2948	21.5048	21.9816	22.0432	0.0582583	1	0.139968	0.0689051
510	LCP1;PLS3	Plastin-2;Plastin-3	P13796;P13797	IGLFADIELSR	11	1232.68	0.00027708	96.143	6546900	1	20.0224	20.1944	20.3122	18.2341	19.3578	20.9316	0.353217	1	-0.668511	-0.336474
511	LDHA	L-lactate dehydrogenase A chain	P00338	GEMMDLQHGSLFLR	14	1632.78	3.1049e-05	106.32	5063800	1	17.8498	19.8803	18.9685	19.4648	17.7201	21.2007	0.184286	1	0.562321	0.237897
512	LDHA	L-lactate dehydrogenase A chain	P00338	LVIITAGAR	9	912.576	5.4338e-09	186.43	68764000	11	22.3522	23.6767	23.5164	23.3348	23.2805	24.0387	0.312214	1	0.369556	0.219513
513	LDHB	L-lactate dehydrogenase B chain	P07195	GMYGIENEVFLSLPCILNAR	20	2295.14	0.019195	58.073	5791800	1	19.5351	21.4506	17.8558	19.3636	18.727	19.6461	0.125628	1	-0.368282	-0.161992
514	LDHB	L-lactate dehydrogenase B chain	P07195	IVVVTAGVR	9	912.576	3.0884e-06	169.37	63516000	12	22.5333	23.8124	23.4389	22.9214	23.0461	23.8131	0.000876989	0.999931	-0.00126712	-0.000758256
515	LETM1	LETM1 and EF-hand domain-containing protein 1, mitochondrial	O95202	QWLDLHLHQEIPTSLLILSR	20	2411.33	0.00036599	84.249	9872900	1	19.8138	21.9831	19.2696	20.2249	20.1435	20.7716	0.00946315	1	0.0244891	0.0119344
516	LGMN	Legumain	Q99538	HWVVIVAGSNGWYNYR	16	1919.94	2.3464e-17	178.15	12633000	4	21.2458	22.5579	19.8434	18.1977	17.5543	21.5314	0.657453	1	-2.12126	-0.79728
517	LPCAT1	Lysophosphatidylcholine acyltransferase 1	Q8NF37	DIPIWGTLIQYIRPVFVSR	19	2272.27	4.9867e-06	110.22	44060000	5	22.1947	23.8039	19.6596	23.0931	23.0034	22.6166	0.347582	1	1.01826	0.421624
518	LRBA	Lipopolysaccharide-responsive and beige-like anchor protein	P50851	AVLTHSIQSAMHSIGGVQVLFPLFAQLDYR	30	3297.73	5.0256e-10	123.36	32243000	8	21.8997	22.6139	21.5008	22.2096	22.6336	22.855	0.676905	1	0.561281	0.355996
519	LRBA	Lipopolysaccharide-responsive and beige-like anchor protein	P50851	WPYQNGFTFHTWLR	14	1851.88	7.2087e-08	132.86	15386000	3	21.32	22.3234	19.2931	20.743	20.7587	21.675	0.0285262	1	0.0800521	0.0373553
520	LRP1	Prolow-density lipoprotein receptor-related protein 1;Low-density lipoprotein receptor-related protein 1 85 kDa subunit;Low-density lipoprotein receptor-related protein 1 515 kDa subunit;Low-density lipoprotein receptor-related protein 1 intracellular domain	Q07954	VYWTNWHTGTISYR	14	1782.85	0.060752	39.219	2888500	0	18.6797	19.7127	18.2151	18.6829	18.3122	19.0919	0.128207	1	-0.173523	-0.102279
521	LRPPRC	Leucine-rich PPR motif-containing protein, mitochondrial	P42704	EEGFPIRPHYFWPLLVGR	18	2212.16	0.029245	55.011	10426000	1	20.4009	22.112	19.0438	20.5336	19.6537	20.6327	0.0931766	1	-0.245597	-0.114732
522	LRPPRC	Leucine-rich PPR motif-containing protein, mitochondrial	P42704	VIEPQYFGLAYLFR	14	1714.91	1.2743e-10	157.96	21918000	2	21.3624	23.6686	18.2859	20.2545	20.2902	21.5335	0.0910872	1	-0.41291	-0.146689
523	LSM8	U6 snRNA-associated Sm-like protein LSm8	O95777	VFSSSQGVEQVVLGLYIVR	19	2079.14	4.9429e-09	125.45	14934000	2	20.5764	22.6628	19.0123	20.2441	20.5627	21.7016	0.0250142	1	0.0856374	0.0365003
524	LTA4H	Leukotriene A-4 hydrolase	P09960	TWDHFWLNEGHTVYLER	17	2202.03	0.0023243	72.819	5902100	1	19.6062	21.2961	18.1188	19.6242	19.0255	19.7839	0.072538	1	-0.195835	-0.0912378
525	LUC7L	Putative RNA-binding protein Luc7-like 1	Q9NQ29	LHLGFIQIR	9	1095.66	0.0078427	75.109	4762800	1	18.904	20.6656	19.3109	19.325	18.8239	19.6761	0.235595	1	-0.351819	-0.196864
526	LYPLA1	Acyl-protein thioesterase 1	O75608	ATAAVIFLHGLGDTGHGWAEAFAGIR	26	2637.35	1.6637e-29	223.85	57795000	8	23.0012	24.1227	21.3027	22.8558	22.5085	23.8374	0.10193	1	0.25839	0.122391
527	LYPLA2	Acyl-protein thioesterase 2	O95372	ETAAVIFLHGLGDTGHSWADALSTIR	26	2737.38	1.0309e-20	177.41	25190000	2	21.193	23.7173	19.3813	21.8726	19.5937	21.8141	0.0813445	1	-0.337102	-0.126537
528	MAGED1	Melanoma-associated antigen D1	Q9Y5V3	LLTYEFVKQKYLDYR	15	2206.14	0.0044284	73.91	2695200	1	16.456	20.8929	19.328	17.9537	18.1231	17.7487	0.29554	1	-0.950483	-0.379629
529	MAP4K4;MINK1;TNIK	Mitogen-activated protein kinase kinase kinase kinase 4;Misshapen-like kinase 1;TRAF2 and NCK-interacting protein kinase	O95819;Q8N4C8;Q9UKE5	VYYLSWLR	8	1098.59	0.0096159	82.305	7280100	1	20.1841	20.7336	19.8516	19.2366	19.5077	20.9573	0.236105	1	-0.355914	-0.19852
530	MARS	Methionine--tRNA ligase, cytoplasmic	P56192	WFNISFDIFGR	11	1400.69	8.22e-06	131.44	43648000	6	22.7445	23.7866	21.0635	21.3712	22.1402	23.5898	0.0553044	1	-0.164413	-0.0738668
531	MARS2	Methionine--tRNA ligase, mitochondrial	Q96GW9	FHAIYWPAFLLGAGMSPPQR	20	2258.15	5.3826e-07	119.46	32207000	7	22.4788	23.4428	20.8685	21.9511	21.5822	22.4802	0.118623	1	-0.258863	-0.129768
532	MATR3	Matrin-3	P43243	LASLMNLGMSSSLNQQGAHSALSSASTSSHNLQSIFNIGSR	41	4203.04	1.2711e-82	314.67	79860000	11	23.0449	24.6872	22.0869	23.2656	22.7382	24.4335	0.0799552	1	0.206102	0.0976984
533	MAVS	Mitochondrial antiviral-signaling protein	Q7Z434	RPGWVEYFIAALR	13	1576.85	1.8694e-05	113.24	4565900	1	19.7305	21.4927	17.4185	19.1207	17.138	17.0496	0.583146	1	-1.77781	-0.694541
534	MCCC2	Methylcrotonoyl-CoA carboxylase beta chain, mitochondrial	Q9HCC0	FLYIWPNAR	9	1178.62	0.00065753	119.57	8218600	1	20.2382	21.1975	19.8103	20.0782	20.249	20.3151	0.184467	1	-0.201265	-0.124533
535	MCCC2	Methylcrotonoyl-CoA carboxylase beta chain, mitochondrial	Q9HCC0	NIPLLFLQNITGFMVGR	17	1932.07	2.3022e-23	210.79	55653000	10	22.5969	24.4406	20.4858	22.4625	23.2444	23.1573	0.141678	1	0.446973	0.188677
536	MCM2	DNA replication licensing factor MCM2	P49736	AIFTTGQGASAVGLTAYVQR	20	2010.05	1.2061e-06	116.82	7031500	1	19.513	21.4792	19.5778	19.5722	19.1882	20.1952	0.309985	1	-0.538162	-0.281985
537	MCM3	DNA replication licensing factor MCM3	P25205	AILCLLLGGVER	12	1312.75	4.278e-06	127.4	18259000	6	20.8418	22.1763	21.7962	21.2913	21.2611	21.4768	0.258704	1	-0.261688	-0.163285
538	MCM4	DNA replication licensing factor MCM4	P33991	GILLQLFGGTR	11	1173.69	1.5285e-10	188.66	150120000	12	24.0972	25.1979	24.9387	23.7425	23.9498	24.8992	0.489623	1	-0.547422	-0.324495
539	MCM4	DNA replication licensing factor MCM4	P33991	SQLLQYVYNLVPR	13	1591.87	1.2768e-06	121.04	5340300	1	19.4709	21.0263	18.8884	19.4645	19.0513	19.4693	0.288919	1	-0.466859	-0.251951
540	MCM5	DNA replication licensing factor MCM5	P33992	IPGIIIAASAVR	12	1179.73	0.0019391	90.108	5331900	1	18.6267	20.7522	19.6739	19.7015	19.0268	19.8389	0.0866535	1	-0.161865	-0.0868866
541	MCM6	DNA replication licensing factor MCM6	Q14566	ISNLIVLHLR	10	1176.73	0.00012433	120.99	48882000	8	15.5708	24.1892	23.5963	23.1001	22.9375	18.3344	0.0359573	1	0.338573	0.0771551
542	MCM7	DNA replication licensing factor MCM7	P33993	ALLLLLVGGVDQSPR	15	1549.92	1.7553e-08	145.55	77387000	12	23.011	24.753	23.0206	22.735	23.2621	23.8489	0.179579	1	-0.312865	-0.167986
543	MDH2	Malate dehydrogenase, mitochondrial	P40926	IFGVTTLDIVR	11	1232.71	1.7772e-06	145.17	51554000	7	21.8778	24.3922	23.1533	21.7292	22.2038	22.9399	0.454141	1	-0.850147	-0.423634
544	MED12	Mediator of RNA polymerase II transcription subunit 12	Q93074	EGLLTSLYSQVHQIVNNWR	19	2256.17	3.8142e-13	151.48	16983000	4	21.4152	21.1021	21.2059	21.3201	20.9106	22.2325	0.242506	1	0.246653	0.154023
545	MED23	Mediator of RNA polymerase II transcription subunit 23	Q9ULK4	LPHWLLGNLVSDFVDTFRPTAR	22	2553.35	3.2123e-09	138.3	111410000	14	23.5968	24.8671	21.872	24.2078	24.2909	24.5392	0.442707	1	0.90064	0.434334
546	MED24	Mediator of RNA polymerase II transcription subunit 24	O75448	ALLSALHWLLR	11	1291.78	1.872e-10	185.84	56299000	10	23.053	24.3994	22.1036	21.9625	22.7825	23.2035	0.28462	1	-0.535831	-0.273496
547	MFGE8	Lactadherin;Lactadherin short form;Medin	Q08431	TWGLHLFSWNPSYAR	15	1833.9	2.5006e-05	108.71	15736000	3	21.0653	22.7182	19.1719	20.6647	20.4813	21.4799	0.0347211	1	-0.109808	-0.0483843
548	MIF	Macrophage migration inhibitory factor	P14174	PMFIVNTNVPR	11	1286.68	1.8456e-21	235.15	57889000	23	22.1002	24.0537	22.8146	23.4104	22.0507	23.6442	0.0200652	1	0.0455831	0.023297
549	MIF	Macrophage migration inhibitory factor	P14174	VYINYYDMNAANVGWNNSTFA	21	2426.06	0.038632	46.131	14157000	1	21.0747	22.9108	18.6227	20.9316	20.6622	18.1695	0.24645	1	-0.948322	-0.348414
550	MMACHC	Methylmalonic aciduria and homocystinuria type C protein	Q9Y4U1	FGGWFAIR	8	952.492	0.010221	81.381	5950300	1	19.8584	20.5375	19.8246	19.2898	19.7846	19.9389	0.592055	1	-0.402427	-0.267617
551	MMGT1	Membrane magnesium transporter 1	Q8N4V1	GLVGIGLFALAHAAFSAAQHR	21	2106.15	3.5853e-09	129.15	61823000	16	22.6031	24.9084	19.2999	21.7421	23.199	23.2792	0.0989166	1	0.469671	0.161816
552	MOCS2	Molybdopterin synthase catalytic subunit	O96007	LGLVPVSEASIIIAVSSAHR	20	2018.15	0.0025559	65.784	8743300	0	19.6085	21.8453	19.8433	19.1955	19.4681	20.8649	0.268609	1	-0.589541	-0.283693
553	MOGS	Mannosyl-oligosaccharide glucosidase	Q13724	GAVWLNVNYLALGALHHYGHLEGPHQAR	28	3092.58	0.00016426	74.074	6950700	1	19.9693	21.2561	18.9758	18.8265	20.6124	19.6735	0.162922	1	-0.362914	-0.178099
554	MOGS	Mannosyl-oligosaccharide glucosidase	Q13724	LHAWFSWLHQSQAGPLPLSYR	21	2493.27	5.0776e-19	179.1	180210000	16	24.7869	25.9159	23.2235	24.3286	24.8918	24.63	0.0104632	1	-0.0253137	-0.0126734
555	MOV10	Putative helicase MOV-10	Q9HCE1	WLLWPMLFPVAPR	13	1624.9	2.1388e-05	112.84	14105000	1	20.3712	22.3686	19.1443	20.7085	20.5322	21.7487	0.133957	1	0.368418	0.166452
556	MPST	3-mercaptopyruvate sulfurtransferase	P25325	LGVGAATHVVIYDASDQGLYSAPR	24	2459.24	1.0024e-09	140.17	7115400	1	19.4577	21.2384	19.6749	19.7929	19.0414	20.6422	0.153229	1	-0.298161	-0.154734
557	MRE11A	Double-strand break repair protein MRE11A	P49959	EDENSWFNLFVIHQNR	16	2046.95	2.9568e-05	103.4	6228900	1	19.2916	21.5756	17.7528	18.9047	18.7244	20.3289	0.0628012	1	-0.220668	-0.0911491
558	MROH2A	Maestro heat-like repeat-containing protein family member 2A	A6NES4	FLLETMAYVK	10	1327.68	0.049839	50.878	9043400	1	19.5931	21.9779	19.817	19.7557	19.5183	20.5751	0.245824	1	-0.51297	-0.253317
559	MRPL19	39S ribosomal protein L19, mitochondrial	P49406	VLHIPEFYVGSILR	14	1641.92	0.069668	29.013	4863600	0	19.1261	21.0221	19.1466	19.1342	16.9478	19.9405	0.426285	1	-1.09079	-0.475727
560	MRPL21	39S ribosomal protein L21, mitochondrial	Q7Z2W9	LFAVVHFASR	10	1145.63	0.05062	47.559	10871000	3	20.4749	17.7446	21.1847	20.6049	20.8027	21.7821	0.496088	1	1.26185	0.546265
561	MRPL53	39S ribosomal protein L53, mitochondrial	Q96EL3	GAHLTALEMLTAFASHIR	18	1938.01	0.00085066	82.259	10329000	2	20.5193	21.9124	19.2749	19.7154	18.5294	21.5191	0.218126	1	-0.647577	-0.274892
562	MRPS2	28S ribosomal protein S2, mitochondrial	Q9Y399	LPDLIIFLHTLNNIFEPHVAVR	22	2570.44	4.4494e-45	277.8	174200000	6	24.1726	26.5142	23.5684	23.6709	24.0797	23.9242	0.402012	1	-0.860168	-0.408398
563	MRTO4	mRNA turnover protein 4 homolog	Q9UKD2	LRGEVGLLFTNR	12	1373.78	0.0095299	71.558	4926900	1	18.728	20.7525	18.6593	19.6489	19.1391	19.8	0.0732887	1	0.149396	0.0780102
564	MRTO4	mRNA turnover protein 4 homolog	Q9UKD2	YLFIFSVANMR	11	1359.7	0.002142	87.476	28507000	5	17.262	23.4025	21.6546	21.2147	21.5925	23.0226	0.242013	1	1.17021	0.376546
565	MSH2	DNA mismatch repair protein Msh2	P43246	LLLAVFVTPLTDLR	14	1569.95	2.0008e-07	123.79	22240000	5	20.9945	22.8793	21.1336	20.6269	21.442	22.4341	0.0737346	1	-0.168189	-0.0840744
566	MSMO1	Methylsterol monooxygenase 1	Q15800	WYFLLAR	7	967.528	2.5505e-07	128.89	16038000	6	21.3569	22.1217	21.431	20.7963	17.8446	21.9815	0.497546	1	-1.42906	-0.582369
567	MSN;RDX;EZR	Moesin;Radixin;Ezrin	P26038;P35241;P15311	IGFPWSEIR	9	1103.58	0.017177	69.598	6349900	1	19.6294	20.7041	19.6808	19.9075	19.4999	20.2709	0.0966389	1	-0.112017	-0.0693671
568	MSTO1	Protein misato homolog 1	Q9BUK6	EVLTLQLGHFAGFVGAHWWNQQDAALGR	28	3120.57	7.0827e-07	108.44	27944000	5	22.2493	22.1178	20.6183	22.3538	22.346	22.5417	0.64442	1	0.752052	0.435456
569	MTHFD1	C-1-tetrahydrofolate synthase, cytoplasmic;Methylenetetrahydrofolate dehydrogenase;Methenyltetrahydrofolate cyclohydrolase;Formyltetrahydrofolate synthetase;C-1-tetrahydrofolate synthase, cytoplasmic, N-terminally processed	P11586	STTTIGLVQALGAHLYQNVFACVR	24	2618.36	1.3257e-20	183.45	71825000	8	23.0428	23.8895	22.7711	23.0289	23.4675	24.277	0.290131	1	0.356663	0.210166
570	MTHFD1L	Monofunctional C1-tetrahydrofolate synthase, mitochondrial	Q6UB35	ASGLVPNVVVLVATVR	16	1592.96	2.8283e-05	104.2	8591100	2	19.6903	22.2244	19.3028	18.7362	19.0699	20.2079	0.451379	1	-1.06786	-0.481295
571	MTOR	Serine/threonine-protein kinase mTOR	P42345	IHGALLILNELVR	13	1459.89	0.0010341	89.805	7242600	1	19.2939	21.637	19.095	18.3868	18.8285	20.9101	0.218803	1	-0.633507	-0.272174
572	MTOR	Serine/threonine-protein kinase mTOR	P42345	SLAVMSMVGYILGLGDRHPSNLMLDR	26	2844.44	0.00028388	77.649	22105000	3	21.2103	23.0859	18.6517	22.1178	22.4106	17.8549	0.0324964	1	-0.188211	-0.0596704
573	MTOR	Serine/threonine-protein kinase mTOR	P42345	VMQLFGLVNTLLANDPTSLR	20	2201.19	0.034193	50.397	4546300	0	19.5794	20.6352	18.6644	19.9812	19.3833	17.9298	0.251201	1	-0.528266	-0.259742
574	MYBBP1A	Myb-binding protein 1A	Q9BQG0	AQHQQALSSLELLNVLFR	18	2066.13	9.6949e-09	140.22	6666400	1	18.8395	21.3524	18.5625	19.7492	18.5391	20.835	0.0376608	1	0.123004	0.0532996
575	MYBBP1A	Myb-binding protein 1A	Q9BQG0	FLSPPALQGYVAWLR	15	1716.94	7.171e-06	117.93	12177000	2	21.2039	22.4012	17.157	20.5988	19.5219	20.7265	0.00570085	1	0.0283782	0.0100207
576	MYBBP1A	Myb-binding protein 1A	Q9BQG0	LTLDLTVLLGVLQGQQQSLQQGAHSTGSSR	30	3134.67	1.3873e-39	240.86	38238000	7	21.5338	23.5437	20.5943	22.5493	23.4948	21.7103	0.275646	1	0.694208	0.313958
577	MYBBP1A	Myb-binding protein 1A	Q9BQG0	QLAVLVAFSSVTNQGLPVTPTFWR	24	2630.42	4.2953e-05	93.572	5277000	1	19.8552	21.0371	17.8946	20.2101	19.458	18.6901	0.0482108	1	-0.142927	-0.0644963
578	MYBBP1A	Myb-binding protein 1A	Q9BQG0	QPDSPTALYHFNASLYLLR	19	2205.12	0.0022834	67.727	25967000	5	21.5503	23.0632	20.5155	21.0954	21.3149	22.892	0.0206684	1	0.0577615	0.0271006
579	MYH9	Myosin-9	P35579	LFTKVKPLLQVSR	13	1756.04	0.069286	48.659	5144500	1	20.3279	20.5403	21.0834	16.3137	17.3519	18.1181	2.39882	0.0966667	-3.38928	-1.91574
580	MYH9	Myosin-9	P35579	VSHLLGINVTDFTR	14	1570.85	0.0036163	74.769	6917000	1	19.1731	21.1461	20.0633	19.9139	19.2719	20.2976	0.176554	1	-0.299704	-0.162513
581	MYH9;MYH11	Myosin-9;Myosin-11	P35579;P35749	LRNWQWWR	8	1243.64	0.0013506	101.28	7086300	2	18.2306	22.0609	16.7703	17.7675	21.0356	17.12	0.066535	1	-0.379591	-0.119024
582	MYO1C	Unconventional myosin-Ic	O00159	IDYANLTGISVSSLSDSLFVLHVQR	25	2733.43	1.4977e-06	114.2	6195900	1	20.0757	21.1314	18.0657	19.9614	18.9217	20.2834	0.0118445	1	-0.0354735	-0.0162082
583	NAA15	N-alpha-acetyltransferase 15, NatA auxiliary subunit	Q9BXJ9	IETHLFAFEIYFR	13	1684.86	8.0784e-08	131.69	5606800	1	20.4496	17.4838	18.0658	17.6837	19.843	21.4377	0.280878	1	0.988396	0.377757
584	NAA40	N-alpha-acetyltransferase 40	Q86UY6	AWYLIAWENSSVPVAFSHFR	20	2379.18	0.00020109	89.049	5648500	1	19.4868	21.1185	18.3867	19.1467	19.0174	20.5414	0.0346549	1	-0.0954666	-0.0447879
585	NADSYN1	Glutamine-dependent NAD(+) synthetase	Q6IA69	FDLRPFLYNTSWPWQFR	17	2272.12	1.1972e-07	123.03	27447000	5	21.905	23.1084	20.1839	21.4353	21.8754	22.6546	0.0998162	1	0.256053	0.120753
586	NAF1	H/ACA ribonucleoprotein complex non-core subunit NAF1	Q96HR8	IFEIFGPVAHPFYVLR	16	1904.03	9.4992e-06	115.78	8350900	1	20.1674	22.0751	17.7667	20.0329	17.3969	20.4766	0.16804	1	-0.700911	-0.252669
587	NAP1L4	Nucleosome assembly protein 1-like 4	Q99733	GIPEFWFTIFR	11	1411.73	7.7578e-08	169.44	63004000	9	22.9238	24.7233	20.9174	22.4946	22.6681	23.6089	0.0199419	1	0.069013	0.0293367
588	NAPG	Gamma-soluble NSF attachment protein	Q99747	TIAQVLVHLHR	11	1285.76	0.067041	39.266	5902000	1	18.6206	20.9343	19.6562	19.7339	19.1181	20.2278	0.0196517	1	-0.0438086	-0.022557
589	NARS	Asparagine--tRNA ligase, cytoplasmic	O43776	FLTWILNR	8	1061.6	3.7904e-06	170.17	97198000	11	23.5883	24.6303	23.5624	23.3351	23.5473	24.4792	0.101	1	-0.139808	-0.0823768
590	NCAPD2	Condensin complex subunit 1	Q15021	AQGPLAMLQHFDTIYSILHHFR	22	2594.32	1.7288e-26	203.81	545920000	23	25.6755	26.9467	25.7002	26.1267	26.7448	26.8709	0.421814	1	0.473336	0.281991
591	NCAPD2	Condensin complex subunit 1	Q15021	FQAVVALAVGR	11	1129.66	0.00013609	109.71	5735600	2	18.8638	20.8182	19.5014	19.5815	17.7813	20.8446	0.111266	1	-0.325322	-0.144022
592	NCBP1	Nuclear cap-binding protein subunit 1	Q09161	FINWFSHHLSNFQFR	15	1978.96	4.5966e-19	209.39	1288700000	25	27.9055	28.2718	26.5361	26.8195	27.3894	28.2607	0.0410304	1	-0.0812912	-0.0433725
593	NCBP1	Nuclear cap-binding protein subunit 1	Q09161	LFVWEILHSTIR	12	1512.85	6.5464e-05	104.87	24583000	5	21.0216	22.5738	21.7376	21.336	21.1134	22.8947	0.00168966	1	0.00371615	0.00193775
594	NCBP1	Nuclear cap-binding protein subunit 1	Q09161	LTIYTTLVGLLNAR	14	1546.91	7.637e-11	164.66	113300000	14	24.02	25.1593	22.9505	23.6084	23.7841	24.4849	0.0414145	1	-0.0841357	-0.0444777
595	NCBP1	Nuclear cap-binding protein subunit 1	Q09161	NLFLVIFQR	9	1148.67	0.025678	61.999	7018800	0	19.907	21.2335	20.02	18.5438	19.4384	20.4317	0.59206	1	-0.91556	-0.484156
596	NCKAP1	Nck-associated protein 1	Q9Y2A7	VFNNVLLQQTQHLDSHGEPTITSLYTNWYLETLLR	35	4143.11	3.4558e-12	125.47	8968400	1	19.4332	22.2189	18.7446	19.8426	19.7602	20.0841	0.0781694	1	-0.236637	-0.104405
597	NDRG1	Protein NDRG1	Q92597	QHIVNDMNPGNLHLFINAYNSR	22	2566.25	0.065118	34.615	1635100	0	18.1574	19.4338	17.2873	17.7955	17.744	17.5165	0.410095	1	-0.607487	-0.332109
598	NDRG3	Protein NDRG3	Q9UGV2	SIIGIGVGAGAYILSR	16	1545.89	1.9486e-08	145.17	6617300	1	19.7919	21.2243	18.6552	19.2817	19.5436	20.4629	0.0533122	1	-0.127721	-0.063069
599	NDUFS3	NADH dehydrogenase [ubiquinone] iron-sulfur protein 3, mitochondrial	O75489	FEIVYNLLSLR	11	1365.77	0.0041128	85.377	7698200	2	18.2856	21.4568	19.3786	19.7122	19.5685	21.2545	0.165118	1	0.471419	0.207191
600	NDUFS8	NADH dehydrogenase [ubiquinone] iron-sulfur protein 8, mitochondrial	O00217	GLGMTLSYLFR	11	1256.66	1.6834e-10	180.03	47484000	8	22.2902	24.0627	21.4645	21.9702	21.2693	23.8673	0.0763859	1	-0.236851	-0.103397
601	NEDD8	NEDD8	Q15843	ILGGSVLHLVLALR	14	1459.92	3.0996e-14	196.76	1111500000	20	26.7169	28.6446	26.7579	26.0568	28.0611	26.8173	0.173091	1	-0.394732	-0.191296
602	NIPBL	Nipped-B-like protein	Q6KC79	FYIAQWFR	8	1129.57	9.4092e-05	146.21	10057000	2	20.6264	21.4589	20.2611	20.0058	20.4001	20.829	0.3622	1	-0.370498	-0.227749
603	NIPSNAP1	Protein NipSnap homolog 1	Q9BPW8	RNQLLLEFSFWNEPQPR	17	2173.11	5.2056e-08	127.83	8542300	1	20.1782	21.8774	17.3378	20.1628	20.3643	19.6344	0.0665241	1	0.256045	0.100727
604	NOLC1	Nucleolar and coiled-body phosphoprotein 1	Q14978	VVPSDLYPLVLGFLR	15	1686.97	2.6396e-05	107.99	22530000	6	21.2263	23.2842	18.9141	20.1752	20.1353	22.7454	0.0269533	1	-0.122868	-0.045018
605	NOMO3;NOMO1;NOMO2	Nodal modulator 3;Nodal modulator 1;Nodal modulator 2	P69849;Q15155;Q5JPE7	LIPLLLQLTSR	11	1265.81	0.063326	45.997	1694700	0	18.2857	18.6805	18.389	17.5241	18.095	18.3396	0.79981	1	-0.465508	-0.316893
606	NOP56	Nucleolar protein 56	O00567	YGLIFHSTFIGR	12	1409.75	0.00032198	93.959	16253000	6	20.9611	22.3725	20.9741	20.5075	20.9286	21.6258	0.294909	1	-0.415273	-0.234531
607	NPM1	Nucleophosmin	P06748	MSVQPTVSLGGFEITPPVVLR	21	2226.21	1.2275e-35	249.62	62499000	14	22.5805	24.3699	23.061	23.0845	22.3907	23.4429	0.231515	1	-0.36442	-0.20051
608	NPM1	Nucleophosmin	P06748	VDNDENEHQLSLR	13	1567.72	7.9212e-06	117.93	5361000	1	16.7152	20.0771	18.463	21.0025	16.9884	20.5687	0.276502	1	1.10145	0.393371
609	NRD1	Nardilysin	O43847	WAQFFIHPLMIR	12	1557.83	0.004684	72.652	58472000	8	23.176	24.4196	21.6829	22.6058	22.84	23.1483	0.101646	1	-0.228142	-0.113697
610	NSDHL	Sterol-4-alpha-carboxylate 3-dehydrogenase, decarboxylating	Q15738	AFHITNDEPIPFWTFLSR	18	2190.09	0.00061494	85.636	7925900	1	20.2218	21.4371	18.3544	20.6185	19.4598	20.1918	0.0300766	1	0.0856298	0.0396759
611	NSDHL	Sterol-4-alpha-carboxylate 3-dehydrogenase, decarboxylating	Q15738	NFLTTAIRPHGIFGPR	16	1795.98	0.042611	53.328	4283300	1	19.3829	21.0808	18.506	19.9451	17.7513	17.571	0.502277	1	-1.23409	-0.542691
612	NTPCR	Cancer-related nucleoside-triphosphatase	Q9BSD7	MELFSQLFIQAVR	13	1580.84	1.0629e-13	187.64	9690800	2	19.3681	21.7397	19.1669	19.6436	19.5158	21.6779	0.0600165	1	0.187547	0.0821477
613	NUDCD3	NudC domain-containing protein 3	Q8IVD9	VLFGFLYR	8	1013.57	0.00059267	132.94	12124000	3	20.6176	21.8361	20.7846	19.509	19.9781	21.6031	0.410922	1	-0.715999	-0.369017
614	NUDT1	7,8-dihydro-8-oxoguanine triphosphatase	P36639	LYTLVLVLQPQR	12	1441.87	8.8344e-11	183.65	18251000	4	20.8403	22.7188	21.2664	20.4557	21.0355	21.6801	0.34057	1	-0.551411	-0.294936
615	NUF2	Kinetochore protein Nuf2	Q9BZD4	FLSGIINFIHFR	12	1462.81	5.8829e-12	200.05	131710000	11	24.2637	25.3274	23.4512	23.5301	24.7548	24.0666	0.130496	1	-0.230314	-0.124586
616	NUP107	Nuclear pore complex protein Nup107	P57740	FMTHLILFFR	10	1323.72	0.00040625	94.692	21457000	4	21.2619	22.325	22.262	19.6204	20.9153	22.4862	0.452361	1	-0.942307	-0.449301
617	NUP133	Nuclear pore complex protein Nup133	Q8WUM0	AHSFLMDFIHQVGLFGR	17	1973.99	1.518e-23	215	522470000	43	26.1906	26.9666	25.695	26.3035	26.4723	26.3324	0.0805688	1	0.0852807	0.0541914
618	NUP85	Nuclear pore complex protein Nup85	Q9BW27	ELLSNWYHFLVTR	13	1676.87	0.00039801	93.206	10304000	1	20.6255	22.1381	18.9459	19.9854	19.7559	20.6475	0.173734	1	-0.440255	-0.203833
619	NUP93	Nuclear pore complex protein Nup93	Q8N1F7	NYTLVTVFGNLHQAQLGGVPGTYQLVR	27	2944.56	1.8394e-21	194.77	26195000	5	21.7037	23.8692	19.3014	21.532	19.7438	21.4678	0.188117	1	-0.710215	-0.26868
620	NUP98	Nuclear pore complex protein Nup98-Nup96;Nuclear pore complex protein Nup98;Nuclear pore complex protein Nup96	P52948	SLAIHLWYLLPPTASISR	18	2037.14	1.0104e-05	105.28	15633000	5	21.2143	22.468	20.3178	20.168	21.1642	21.2896	0.25433	1	-0.459434	-0.23961
621	NUS1	Dehydrodolichyl diphosphate syntase complex subunit NUS1	Q96E22	FGTWNWIWR	9	1264.61	7.0785e-06	162.5	6656600	1	19.7227	21.0418	17.9536	19.6923	19.6063	20.7252	0.170645	1	0.435244	0.201114
622	NUTF2	Nuclear transport factor 2	P61970	PIWEQIGSSFIQHYYQLFDNDR	22	2755.3	7.3859e-27	217.62	77202000	8	23.9307	23.3537	22.0387	22.3029	22.7738	25.0122	0.0903456	1	0.255275	0.115722
623	NXF1	Nuclear RNA export factor 1	Q9UBU9	SLVLHFLQQYYAIYDSGDR	19	2287.13	3.4864e-09	132.13	48138000	5	23.0035	24.0464	20.1136	22.4937	22.4383	23.2067	0.096796	1	0.325059	0.135328
624	OAT	Ornithine aminotransferase, mitochondrial;Ornithine aminotransferase, hepatic form;Ornithine aminotransferase, renal form	P04181	IVFAAGNFWGR	11	1236.64	1.3551e-10	190.08	35310000	5	22.793	23.6029	21.078	21.9057	22.313	21.9131	0.232089	1	-0.447368	-0.228672
625	OGFOD1	Prolyl 3-hydroxylase OGFOD1	Q8N543	LSISGWFHGPSLTRPPNYFEPPIPR	25	2864.48	3.055e-06	106.43	61660000	9	22.8752	23.9824	22.2307	23.5591	22.8734	23.5671	0.209803	1	0.303723	0.172489
626	ORC5	Origin recognition complex subunit 5	O43913	LLAILYSIVDSR	12	1361.79	4.6059e-06	125.75	5774900	1	19.4233	21.2285	18.7943	19.3043	19.1308	19.8403	0.197382	1	-0.390209	-0.199071
627	OSBP	Oxysterol-binding protein 1	P22059	WFVLSNGLLSYYR	13	1616.84	4.9847e-14	197.06	21758000	3	21.4685	22.9774	20.0129	20.9657	20.7138	22.4608	0.0353993	1	-0.106147	-0.0479278
628	OSBPL9	Oxysterol-binding protein-related protein 9	Q96SU4	WYLSAFHAGR	10	1206.59	0.018377	63.283	8014400	1	20.5808	20.9305	19.8281	20.0934	20.3499	20.0181	0.358109	1	-0.292649	-0.189982
629	P4HA2	Prolyl 4-hydroxylase subunit alpha-2	O15460	SQVLDYLSYAVFQLGDLHR	19	2223.13	0.00059195	77.514	6794000	1	18.8948	21.061	18.365	20.668	19.1165	20.5609	0.281756	1	0.674864	0.31178
630	P4HB	Protein disulfide-isomerase	P07237	ILFIFIDSDHTDNQR	15	1832.91	1.4252e-14	190.27	146990000	12	24.0465	25.7536	24.0133	23.654	24.1735	24.5186	0.319638	1	-0.489106	-0.267687
631	PA2G4	Proliferation-associated protein 2G4	Q9UQ80	FTVLLMPNGPMR	12	1374.72	0.024141	60.019	2173500	0	19.1012	20.1058	18.5265	16.6821	18.0757	18.6551	0.901185	1	-1.44023	-0.74028
632	PA2G4	Proliferation-associated protein 2G4	Q9UQ80;H0YIN7	IDLGVHVDGFIANVAHTFVVDVAQGTQVTGR	31	3234.68	1.0991e-29	209.68	61528000	11	22.6734	24.0669	21.9587	23.5241	23.298	23.3664	0.328047	1	0.496502	0.272413
633	PABPC1	Polyadenylate-binding protein 1	P11940	GYGFVHFETQEAAER	15	1739.79	1.1704e-07	122.34	8654600	1	19.4679	21.1975	20.0417	20.8243	19.4615	20.8321	0.0701462	1	0.136925	0.0727232
634	PABPC1;PABPC3	Polyadenylate-binding protein 1;Polyadenylate-binding protein 3	P11940;Q9H361	GFGFVSFER	9	1044.5	0.00060424	122.74	9465600	2	20.1765	21.4766	20.0964	20.5053	19.7832	20.8198	0.146478	1	-0.213711	-0.122648
635	PABPC1;PABPC3;PABPC4;PABPC1L	Polyadenylate-binding protein 1;Polyadenylate-binding protein 3;Polyadenylate-binding protein 4;Polyadenylate-binding protein 1-like	P11940;Q9H361;Q13310;Q4VXU2	PLYVALAQR	9	1029.6	0.000236	138.62	21853000	9	21.1358	22.0684	22.0209	21.2958	21.4936	22.356	0.019878	1	-0.0265573	-0.0161455
636	PABPC1;PABPC4	Polyadenylate-binding protein 1;Polyadenylate-binding protein 4	P11940;Q13310	ITGMLLEIDNSELLHMLESPESLR	24	2739.38	1.8279e-09	133.58	18498000	3	20.7735	22.8213	19.1687	21.895	19.6585	21.9235	0.0638094	1	0.237809	0.0952683
637	PAFAH1B2	Platelet-activating factor acetylhydrolase IB subunit beta	P68402	IIVLGLLPR	9	992.675	0.00047103	128.48	11665000	3	19.9153	21.6994	21.0725	20.1664	20.7126	21.0495	0.163308	1	-0.252879	-0.141868
638	PAFAH1B3	Platelet-activating factor acetylhydrolase IB subunit gamma	Q15102	ELFSPLHALNFGIGGDGTQHVLWR	24	2663.36	0.00064892	69.72	12291000	2	20.2312	22.0769	19.6385	20.9584	19.8586	21.4333	0.039552	1	0.101238	0.0489118
639	PANK4	Pantothenate kinase 4	Q9NVE7	VYFGGFFIR	9	1104.58	0.00089103	101.69	6931800	1	19.9576	21.5715	19.1234	19.2495	17.2427	20.6122	0.414384	1	-1.18269	-0.489917
640	PAPSS1	Bifunctional 3-phosphoadenosine 5-phosphosulfate synthase 1;Sulfate adenylyltransferase;Adenylyl-sulfate kinase	O43252	AWTVLTEYYKSLEKA	15	2029.02	0.00048457	93.823	24527000	6	22.2145	22.3994	21.1874	21.3402	21.7192	22.4255	0.0751373	1	-0.105467	-0.0622884
641	PAPSS1	Bifunctional 3-phosphoadenosine 5-phosphosulfate synthase 1;Sulfate adenylyltransferase;Adenylyl-sulfate kinase	O43252	VLTMAPGLITLEIVPFR	17	1869.08	1.9809e-05	103.66	6250600	1	19.3851	21.3265	19.5766	18.6413	19.7595	19.7102	0.433044	1	-0.725718	-0.378494
642	PBDC1	Protein PBDC1	Q9BVG4	IQFFAIEIAR	10	1206.68	0.0086633	72.643	6065100	0	19.6288	21.2859	19.6374	19.7167	18.2025	19.9607	0.49987	1	-0.890741	-0.450229
643	PBRM1	Protein polybromo-1	Q86U86	ILFNVVLEAR	10	1172.69	0.027438	59.426	3443700	0	18.4685	19.6336	19.0527	18.451	19.0797	19.63	0.0013563	1	0.00199	0.00118548
644	PCBP1	Poly(rC)-binding protein 1	Q15365	QVTITGSAASISLAQYLINAR	21	2176.19	3.0393e-20	200.44	67197000	8	22.8104	24.8239	22.0518	22.9776	22.4202	23.5074	0.106119	1	-0.260297	-0.124864
645	PCBP2	Poly(rC)-binding protein 2	Q15366	QVTITGSAASISLAQYLINVR	21	2204.22	2.0749e-35	249.13	84639000	9	23.1613	24.7768	22.5061	23.3359	22.9286	24.3899	0.0293654	1	0.070116	0.0350048
646	PCK2	Phosphoenolpyruvate carboxykinase [GTP], mitochondrial	Q16822	PFFGYNFGHYLEHWLSMEGR	20	2486.13	0.016973	59.281	7523400	1	20.0077	19.9347	18.9131	18.4204	19.7003	21.8464	0.128233	1	0.370515	0.163937
647	PCK2;PCK1	Phosphoenolpyruvate carboxykinase [GTP], mitochondrial;Phosphoenolpyruvate carboxykinase, cytosolic [GTP]	Q16822;P35558	IFHVNWFR	8	1117.58	0.0067178	79.116	14793000	5	21.6209	17.7262	21.3863	21.344	21.4746	21.6324	0.417599	1	1.23924	0.502996
648	PCYOX1	Prenylcysteine oxidase 1	Q9UHG3	IAIIGAGIGGTSAAYYLR	18	1765.97	1.1969e-12	169.23	6520900	1	19.3299	21.3276	19.1843	19.4236	19.3265	20.2807	0.131707	1	-0.270325	-0.138274
649	PCYOX1L	Prenylcysteine oxidase-like	Q8NBM8	IAVVGAGIGGSAVAHFLQQHFGPR	24	2388.28	5.316e-10	144.01	48331000	6	22.7053	23.9712	21.7089	22.1243	22.566	23.3695	0.0497364	1	-0.108569	-0.0556986
650	PDIA3	Protein disulfide-isomerase A3	P30101	ELSDFISYLQR	11	1369.69	0.00021553	102.07	5902200	1	18.9445	21.2708	18.7578	20.0087	18.0107	20.3851	0.0600675	1	-0.189553	-0.0826387
651	PDS5A	Sister chromatid cohesion protein PDS5 homolog A	Q29RF7	DIFLFITR	8	1023.58	0.017337	70.525	3500800	1	18.3636	20.4919	18.5219	17.5302	18.2903	19.6146	0.284993	1	-0.647419	-0.305926
652	PDS5A	Sister chromatid cohesion protein PDS5 homolog A	Q29RF7	LLSLLPEYVVPYMIHLLAHDPDFTR	25	2951.56	2.104e-14	161.04	135990000	7	19.5055	25.8323	21.3037	24.9204	24.8536	23.3709	0.483651	1	2.16779	0.688414
653	PDS5A	Sister chromatid cohesion protein PDS5 homolog A	Q29RF7	QQYLPLALHLASEFFLR	17	2045.11	0.002203	73.464	16600000	2	20.9055	22.872	19.1273	20.2548	20.1219	21.9295	0.0561296	1	-0.199593	-0.0822064
654	PELO	Protein pelota homolog	Q9BRX2	IFSSLHVSGEQLSQLTGVAAILR	23	2425.33	1.4567e-14	168.27	34268000	6	21.8628	23.6	21.6314	21.5028	22.2952	22.6032	0.119901	1	-0.231005	-0.121427
655	PEPD	Xaa-Pro dipeptidase	P12955	PSVLLTLR	8	897.565	2.0561e-05	150.17	7126400	3	18.7823	20.6501	20.4777	19.9766	19.9735	20.5249	0.10918	1	0.188288	0.103256
656	PFAS	Phosphoribosylformylglycinamidine synthase	O15067	AVRPWQWAWRPPPFDTLTTSPWLQLFINAR	30	3649.91	2.8885e-21	178.33	17868000	2	20.6953	22.3435	19.1736	20.1165	21.0841	22.7175	0.182114	1	0.568577	0.237992
657	PFAS	Phosphoribosylformylglycinamidine synthase	O15067	GHLLYVALSPGQHR	14	1546.84	8.2904e-08	130.56	31661000	9	21.2315	23.208	22.625	22.291	21.5112	22.2302	0.208946	1	-0.344065	-0.187236
658	PFAS	Phosphoribosylformylglycinamidine synthase	O15067	GWAAAVTFHPR	11	1211.62	7.0093e-05	111.06	14765000	4	20.6116	21.8403	21.196	19.9981	20.7203	22.0124	0.167692	1	-0.305708	-0.16194
659	PGAM4;PGAM1	Probable phosphoglycerate mutase 4;Phosphoglycerate mutase 1	Q8N0Y7;P18669	AAYKLVLIR	9	1159.71	0.00084105	94.262	22762000	8	21.8568	22.0554	22.1512	21.7133	21.7754	21.4775	1.36166	1	-0.36573	-0.27592
660	PGD	6-phosphogluconate dehydrogenase, decarboxylating	P52209	IISYAQGFMLLR	12	1410.77	8.0068e-05	103.55	15876000	1	20.7638	23.0926	18.4114	20.553	20.3936	20.8472	0.0395391	1	-0.157994	-0.0617679
661	PGD	6-phosphogluconate dehydrogenase, decarboxylating	P52209	PGQFIHTNWTGHGGTVSSSSYNA	23	2404.08	0.00042328	81.016	13486000	2	20.1993	22.2992	20.7564	20.7006	20.0276	21.2975	0.219479	1	-0.409733	-0.212592
662	PGK1	Phosphoglycerate kinase 1	P00558	QIVWNGPVGVFEWEAFAR	18	2104.05	0.0012834	75.143	6503400	1	19.5358	21.7581	17.3748	19.3354	19.1992	19.5413	0.0536318	1	-0.197601	-0.0800228
663	PGK1;PGK2	Phosphoglycerate kinase 1;Phosphoglycerate kinase 2	P00558;P07205	LGDVYVNDAFGTAHR	15	1633.78	3.5792e-05	103.14	9044300	3	18.6334	21.2074	19.9679	20.8737	18.4521	21.473	0.09991	1	0.330028	0.138355
664	PGM1	Phosphoglucomutase-1	P36871	HGFFVNPSDSVAVIAANIFSIPYFQQTGVR	30	3280.67	1.5697e-21	185.68	60257000	7	23.3966	23.7158	21.2173	23.5414	23.0008	23.5634	0.297954	1	0.59198	0.295059
665	PGRMC1	Membrane-associated progesterone receptor component 1	O00264	FYGPEGPYGVFAGR	14	1515.71	0.0058807	76.143	7505900	1	20.0368	21.0913	19.4246	20.3325	19.3207	20.5329	0.0695248	1	-0.122208	-0.0673495
666	PGRMC2	Membrane-associated progesterone receptor component 2	O15173	FYGPAGPYGIFAGR	14	1471.72	0.0030515	85.377	6339800	1	20.7914	21.2481	19.9219	17.9956	19.9895	17.6748	1.20111	1	-2.10048	-1.03885
667	PHB	Prohibitin	P35232	FGLALAVAGGVVNSALYNVDAGHR	24	2370.24	1.5395e-09	135.91	99448000	14	23.9203	24.9376	22.4602	23.2918	23.9223	24.2171	0.0162701	1	0.037721	0.0191574
668	PHB2	Prohibitin-2	Q99623	IPWFQYPIIYDIR	13	1722.91	3.0981e-10	149.96	9865400	2	20.4626	22.1648	17.8177	19.3806	19.4253	21.0025	0.0532647	1	-0.212287	-0.0825196
669	PHB2	Prohibitin-2	Q99623	LLLGAGAVAYGVR	13	1258.74	8.7924e-05	98.033	5419300	1	18.7317	20.7601	18.9854	19.6895	19.1229	20.2793	0.102279	1	0.204859	0.106689
670	PHGDH	D-3-phosphoglycerate dehydrogenase	O43175	PWIGLAEALGTLMR	14	1526.83	1.6416e-07	128.17	40709000	11	22.1394	23.8779	20.3841	22.5696	21.214	23.3441	0.0715439	1	0.2421	0.1015
671	PHGDH	D-3-phosphoglycerate dehydrogenase	O43175	TLGILGLGR	9	898.56	0.059688	46.994	3731200	0	17.9158	19.6623	19.0961	19.8534	18.0912	19.7261	0.163094	1	0.332104	0.168935
672	PI4KA	Phosphatidylinositol 4-kinase alpha	P42356	GFYFNTVLSLAR	12	1386.73	5.1468e-05	114.5	8014200	2	20.0672	20.8588	19.2416	19.2577	19.7626	21.4565	0.0432695	1	0.103076	0.0512179
673	PI4KA;PI4KAP1;PI4KAP2	Phosphatidylinositol 4-kinase alpha;Putative inactive phosphatidylinositol 4-kinase alpha-like protein P1;Putative phosphatidylinositol 4-kinase alpha-like protein P2	P42356;Q8N8J0;A4QPH2	LLTLGLSLLHADVVPNATIR	20	2115.24	2.0347e-06	113.53	22199000	5	21.7763	22.554	21.3535	21.0059	21.9764	21.7545	0.27684	1	-0.31564	-0.19037
674	PIK3C3	Phosphatidylinositol 3-kinase catalytic subunit type 3	Q8NEB9	LFHIDFGYILGR	12	1449.78	1.4721e-06	136.02	34867000	6	22.0992	23.3301	22.0365	21.2182	22.3094	22.9117	0.20297	1	-0.342148	-0.184907
675	PIN4	Peptidyl-prolyl cis-trans isomerase NIMA-interacting 4	Q9Y237	FGYHIIMVEGR	11	1320.66	0.00025973	94.616	13779000	3	20.1701	22.6627	20.4696	20.5862	20.0178	20.8359	0.307859	1	-0.620831	-0.307014
676	PIP4K2C	Phosphatidylinositol 5-phosphate 4-kinase type-2 gamma	Q8TBX8	RFLDFITNIFA	11	1355.72	0.044082	65.305	8013500	1	19.7167	21.6725	18.1008	20.1426	20.2586	20.0906	0.11755	1	0.333926	0.149488
677	PKM	Pyruvate kinase PKM	P14618	EAEAAIYHLQLFEELR	16	1930.98	3.0789e-05	102.65	9260200	2	18.8018	21.6681	19.476	19.6012	17.8506	21.9121	0.0454159	1	-0.194017	-0.072935
678	PKM	Pyruvate kinase PKM	P14618	EAEAAIYHLQLFEELRR	17	2087.08	0.00093872	86.378	18346000	3	19.2072	23.4843	19.2343	21.1639	19.2556	21.2028	0.0216397	1	-0.101175	-0.0366607
679	PKM	Pyruvate kinase PKM	P14618	FGVEQDVDMVFASFIR	16	1858.89	4.842e-12	164.11	28654000	4	19.4794	24.1825	17.7731	21.2134	19.8895	22.3259	0.11855	1	0.664588	0.205011
680	PKM	Pyruvate kinase PKM	P14618	GDVVIVLTGWRPGSGFTNTMR	21	2262.16	0.0067397	65.784	41953000	8	22.1494	23.762	22.4944	21.492	21.4592	23.4342	0.341234	1	-0.673507	-0.333999
681	PKM	Pyruvate kinase PKM	P14618	RFDEILEASDGIMVAR	16	1820.91	2.1928e-05	106.6	3051100	1	17.9378	21.1841	18.6712	17.9182	17.7002	17.9397	0.646952	1	-1.41168	-0.645808
682	PLA2G4A	Cytosolic phospholipase A2;Phospholipase A2;Lysophospholipase	P47712	IHVVDSGLTFNLPYPLILRPQR	22	2547.43	1.2951e-06	117.26	8688000	1	20.054	21.3749	19.5518	20.2414	20.093	20.7419	0.0183348	1	0.0318794	0.0179298
683	PLD3	Phospholipase D3	Q8IV08	AFLLSLAALR	10	1073.66	0.011978	71.501	10253000	1	20.2998	21.1715	21.1209	19.6354	19.6211	21.3639	0.437627	1	-0.657248	-0.356452
684	PLD3	Phospholipase D3	Q8IV08	IFEAYWFLGQAGSSIPSTWPR	21	2412.19	1.7721e-10	147.16	21068000	5	21.6002	22.8609	19.4708	21.3971	21.4149	21.9269	0.0957747	1	0.268983	0.12202
685	PLD3	Phospholipase D3	Q8IV08	SFIYVAVMNYLPTLEFSHPHR	21	2520.26	5.0604e-06	103.17	27279000	6	21.9412	23.0285	20.3936	21.1876	22.6572	22.0412	0.0696137	1	0.174252	0.0839689
686	PLOD3	Procollagen-lysine,2-oxoglutarate 5-dioxygenase 3	O60568	FLNSGGFIGFATTIHQIVR	19	2077.11	0.00061691	76.768	33465000	1	22.1701	23.5405	21.2782	21.6626	22.0565	22.5915	0.115557	1	-0.226071	-0.118308
687	PLOD3	Procollagen-lysine,2-oxoglutarate 5-dioxygenase 3	O60568	GIFLHLSNQHEFGR	14	1653.84	0.05789	48.704	7297100	1	19.6375	20.9034	20.0212	19.8837	19.7583	20.6114	0.0789465	1	-0.102902	-0.0620069
688	PLS3	Plastin-3	P13797	NWMNSLGVNPHVNHLYADLQDALVILQLYER	31	3634.84	4.5954e-15	154.63	18071000	3	20.8263	21.9194	18.864	19.8844	21.6477	22.8414	0.302212	1	0.921262	0.37763
689	PNP	Purine nucleoside phosphorylase	P00491	LVFGFLNGR	9	1021.57	0.0008427	105.39	10508000	2	20.4402	21.6621	20.5504	20.3832	20.352	20.5408	0.509375	1	-0.45891	-0.287793
690	POLD1	DNA polymerase delta catalytic subunit	P28340	GLLPQILENLLSAR	14	1535.9	0.0032718	84.658	4273800	1	19.582	21.2675	18.5582	19.1425	17.77	17.7353	0.80083	1	-1.58664	-0.749929
691	POLD2	DNA polymerase delta subunit 2	P49005	LVTGTVLAVFGSVR	14	1417.83	0.00057997	92.039	11512000	1	20.332	22.1936	20.1382	19.1775	20.281	21.1793	0.316082	1	-0.675327	-0.325569
692	POLDIP2	Polymerase delta-interacting protein 2	Q9Y2S7	YETGQLFLHSIFGYR	15	1829.91	1.9149e-05	111.74	14228000	2	20.6659	22.6466	19.5548	20.0971	19.7573	21.6187	0.163378	1	-0.464755	-0.204727
693	POLK	DNA polymerase kappa	Q9UBT6	PLEMSHKK	8	1196.6	0.075645	40.946	29363000	1	22.5671	22.8115	21.3391	21.212	21.9959	22.6372	0.180092	1	-0.290859	-0.160315
694	POLR1A	DNA-directed RNA polymerase I subunit RPA1	O95602	LFTAYLQLYR	10	1286.7	4.7985e-14	213.35	27285000	6	21.8268	22.9773	21.6508	21.0949	21.843	22.5198	0.221625	1	-0.332423	-0.186221
695	POLR2B	DNA-directed RNA polymerase II subunit RPB2	P30876	RLDLAGPLLAFLFR	14	1600.95	1.1103e-07	125.53	22581000	6	21.1019	22.3346	20.0316	23.0327	21.2492	21.4659	0.364351	1	0.759864	0.366929
696	POLR2H	DNA-directed RNA polymerases I, II, and III subunit RPABC3	P52434	LSAYVSYGGLLMR	13	1428.74	0.00095882	90.827	16968000	5	20.742	22.0667	21.4392	21.0982	21.0146	21.7854	0.0914975	1	-0.116541	-0.0704644
697	POLR2L	DNA-directed RNA polymerases I, II, and III subunit RPABC5	P62875	MLLAHVDLIEKLLNYAPLEK	20	2550.39	0.00088432	69.081	14466000	2	22.1943	22.3675	20.7969	20.9486	17.335	18.6466	1.13189	0.992235	-2.80954	-1.1868
698	POLR3A	DNA-directed RNA polymerase III subunit RPC1	O14802	GFVANSFYSGLTPTEFFFHTMAGR	24	2683.25	0.0003609	80.683	8192500	1	20.1578	21.7264	18.2952	19.8258	19.526	20.561	0.0287693	1	-0.0888704	-0.0397047
699	POLR3E	DNA-directed RNA polymerase III subunit RPC5	Q9NVU0	LFNLHLASLPPGHTLFSGISDR	22	2391.27	0.05798	40.137	7463200	0	19.936	20.4499	20.0653	19.6423	20.3018	20.7953	0.093195	1	0.0960789	0.0612783
700	PPIA	Peptidyl-prolyl cis-trans isomerase A;Peptidyl-prolyl cis-trans isomerase A, N-terminally processed	P62937	EGMNIVEAMER	11	1277.57	6.0254e-05	117.01	4286500	1	18.0477	19.5002	18.2612	20.9082	16.5681	20.1528	0.161252	1	0.606628	0.232143
701	PPIA	Peptidyl-prolyl cis-trans isomerase A;Peptidyl-prolyl cis-trans isomerase A, N-terminally processed	P62937	VNPTVFFDIAVDGEPLGR	18	1944.99	3.1198e-12	160.48	48037000	11	22.3953	23.9725	20.9822	23.1436	21.9921	23.3306	0.143897	1	0.372117	0.172298
702	PPM1F	Protein phosphatase 1F	P49593	QWLVSIHAIR	10	1221.7	0.0069161	71.349	7416800	1	19.4214	21.2253	19.9124	19.9248	19.7197	20.4349	0.0990482	1	-0.159904	-0.0898883
703	PPM1G	Protein phosphatase 1G	O15355	LPLPYGFSAMQGWR	14	1621.81	0.0025841	82.417	7452200	1	20.142	21.5034	16.9711	19.588	19.5963	20.732	0.112554	1	0.433254	0.166932
704	PPME1	Protein phosphatase methylesterase 1	Q9Y570	YWDGWFR	7	1028.45	0.0012945	118.06	7484600	2	19.803	21.0842	19.3667	19.5952	20.0849	20.7525	0.0326664	1	0.0595252	0.0327974
705	PPOX	Protoporphyrinogen oxidase	P50336	FLYVGGALHALPTGLR	16	1683.95	0.001089	87.566	6391400	1	19.2908	21.1296	19.8153	18.9478	19.6046	20.2306	0.297482	1	-0.484266	-0.260288
706	PPOX	Protoporphyrinogen oxidase	P50336	SILLGLLLGAGR	12	1181.75	4.4616e-07	146.69	9074500	2	19.9971	21.7759	19.6754	18.7587	20.0828	20.9642	0.235224	1	-0.547604	-0.258902
707	PPP1R8	Nuclear inhibitor of protein phosphatase 1;Activator of RNA decay	Q12972	VFLIDLNSTHGTFLGHIR	18	2039.1	1.8438e-08	133.45	20367000	6	21.3539	22.6153	21.6295	20.7923	21.3036	21.7846	0.526985	1	-0.57273	-0.341272
708	PPP2R1A	Serine/threonine-protein phosphatase 2A 65 kDa regulatory subunit A alpha isoform	P30153	YFAQEALTVLSLA	13	1424.76	0.038468	61.78	5512800	1	18.3342	21.7216	17.9452	18.3507	18.114	20.1172	0.128015	1	-0.473057	-0.185108
709	PPP2R1A;PPP2R1B	Serine/threonine-protein phosphatase 2A 65 kDa regulatory subunit A alpha isoform;Serine/threonine-protein phosphatase 2A 65 kDa regulatory subunit A beta isoform	P30153;P30154	LSTIALALGVER	12	1241.73	0.00012398	103.34	22868000	8	20.7329	22.6963	21.8514	21.6003	21.2374	22.2225	0.039165	1	-0.0734692	-0.0399894
710	PRDX2	Peroxiredoxin-2	P32119	LGCEVLGVSVDSQFTHLAWINTPR	24	2698.35	7.192e-10	142.42	6398900	1	19.1671	21.322	17.7398	19.6915	18.3166	20.7768	0.0504696	1	0.185331	0.0752991
711	PRDX2;PRDX1	Peroxiredoxin-2;Peroxiredoxin-1	P32119;Q06830	QITVNDLPVGR	11	1210.67	1.2013e-05	123.35	10801000	2	17.6716	20.8619	20.2938	21.6395	18.4855	21.8451	0.288882	1	1.04762	0.39304
712	PRDX3	Thioredoxin-dependent peroxide reductase, mitochondrial	P30048	DYGVLLEGSGLALR	14	1461.78	1.8838e-07	125.22	6323200	1	18.6514	21.368	19.0316	19.8019	18.7843	20.3141	0.0173645	1	-0.0502466	-0.0232522
713	PRDX6	Peroxiredoxin-6	P30041	FHDFLGDSWGILFSHPR	17	2029.98	1.5853e-37	257.37	2261500000	25	28.0811	29.4966	27.0323	27.6831	27.945	29.1818	0.0262768	1	0.0666631	0.0325106
714	PRDX6	Peroxiredoxin-6	P30041	IRFHDFLGDSWGILFSHPR	19	2299.17	5.6484e-06	96.487	13427000	3	20.2695	22.0169	18.581	21.4208	21.874	19.7413	0.240438	1	0.72287	0.303068
715	PRDX6	Peroxiredoxin-6	P30041	PGGLLLGDVAPNFEANTTVGR	21	2097.09	4.8264e-14	169.25	19439000	5	20.8641	22.7141	21.0821	21.213	21.2985	21.7056	0.0869358	1	-0.147725	-0.0819233
716	PREP	Prolyl endopeptidase	P48147	FIATLQYIVGR	11	1279.73	8.3973e-06	131.06	17896000	1	21.2709	22.3554	21.0648	20.6765	21.0752	21.9028	0.254568	1	-0.345542	-0.198685
717	PREP	Prolyl endopeptidase	P48147	LDGSHPAFLYGYGGFNISITPNYSVSR	27	2931.42	5.4328e-10	137.62	28499000	4	21.7818	23.5082	19.6493	21.7302	21.1568	22.5923	0.0519623	1	0.17999	0.0752645
718	PREP	Prolyl endopeptidase	P48147	YFYFYNTGLQNQR	13	1712.79	2.5897e-24	229.48	21933000	3	22.0744	22.4423	21.2247	21.5831	21.1891	21.8706	0.37327	1	-0.366231	-0.227313
719	PRKAG1	5-AMP-activated protein kinase subunit gamma-1	P54619	TTTPVYVALGIFVQHR	16	1800.99	0.0016266	83.729	4655900	1	19.9499	21.1315	19.9226	18.4248	17.9698	17.3002	2.04029	0.683556	-2.43638	-1.42042
720	PRKAR1A	cAMP-dependent protein kinase type I-alpha regulatory subunit;cAMP-dependent protein kinase type I-alpha regulatory subunit, N-terminally processed	P10644	MYEEFLSKVSILESLDKWER	20	2729.34	0.025149	56.149	5595600	1	20.5837	20.816	17.8414	19.0057	19.0374	19.7452	0.187882	1	-0.484247	-0.221602
721	PRKCI	Protein kinase C iota type	P41743	FYSAEISLALNYLHER	16	1924.97	9.1952e-09	145.69	25132000	3	21.5008	23.1289	20.2543	21.1082	21.0067	22.814	0.00481643	1	0.0149708	0.00674965
722	PRKDC	DNA-dependent protein kinase catalytic subunit	P78527	ETGLMYSIMVHALR	14	1619.82	0.075332	39.509	5504400	1	19.5178	21.7657	17.2365	19.1265	18.6521	17.6383	0.30543	1	-1.03437	-0.401049
723	PRKDC	DNA-dependent protein kinase catalytic subunit	P78527	YYIQNGIQSFMQNYSSIDVLLHQSR	25	3003.45	5.2958e-15	171.15	14071000	2	20.4351	22.5745	18.1382	21.0791	20.7604	21.2038	0.187511	1	0.631817	0.253978
724	PRMT1	Protein arginine N-methyltransferase 1	Q99873	NDYVHALVAYFNIEFTR	17	2071.02	1.0974e-08	143.67	15837000	3	21.4112	21.9979	18.9793	20.7024	20.4264	22.3178	0.117061	1	0.352769	0.153626
725	PRMT1	Protein arginine N-methyltransferase 1	Q99873	RNDYVHALVAYFNIEFTR	18	2227.12	1.3337e-05	101.92	28813000	6	22.3431	23.3681	20.0829	21.9093	21.6245	22.0633	0.0223946	1	-0.0656605	-0.0301344
726	PRMT5	Protein arginine N-methyltransferase 5;Protein arginine N-methyltransferase 5, N-terminally processed	O14744	IAVALEIGADLPSNHVIDR	19	2002.08	3.7823e-06	104.88	12029000	2	19.8017	22.2299	20.7225	20.5759	17.819	21.4692	0.299375	1	-0.963352	-0.384298
727	PRMT5	Protein arginine N-methyltransferase 5;Protein arginine N-methyltransferase 5, N-terminally processed	O14744	TWMWWHNFR	9	1362.61	0.00031163	125.31	245440000	23	24.9562	26.0785	23.9715	24.9768	24.8458	25.8952	0.12543	1	0.237225	0.125354
728	PRPF19	Pre-mRNA-processing factor 19	Q9UMS4	ALQDEWDAVMLHSFTLR	17	2030.99	0.0012572	82.813	6087000	2	17.989	22.1817	17.8363	18.2286	17.7052	19.0111	0.278534	1	-1.0207	-0.381799
729	PRPF8	Pre-mRNA-processing-splicing factor 8	Q6P2Q9	FLGFFMVPAQSSWNYNFMGVR	21	2497.17	1.7933e-13	154.49	109070000	14	24.002	25.1663	22.0409	23.8842	23.2939	24.5482	0.0609383	1	0.172383	0.0790291
730	PRPF8	Pre-mRNA-processing-splicing factor 8	Q6P2Q9	FTLWWSPTINR	11	1419.73	1.2585e-05	122.13	10433000	3	21.0616	21.6621	19.6448	19.4969	19.7369	21.249	0.317146	1	-0.628562	-0.312498
731	PRPF8	Pre-mRNA-processing-splicing factor 8	Q6P2Q9	LGNVDAFQLADGLQYIFAHVGQLTGMYR	28	3096.55	2.0436e-39	241.54	163840000	2	18.3123	18.2418	24.4415	25.2141	22.7494	26.5027	0.898275	0.823429	4.49018	1.27153
732	PRPF8	Pre-mRNA-processing-splicing factor 8	Q6P2Q9	WNTALIGLMTYFR	13	1584.81	9.8207e-11	162.68	23851000	4	21.1145	23.0233	20.2731	21.12	21.0838	22.7968	0.0693534	1	0.196536	0.0897181
733	PRPS2	Ribose-phosphate pyrophosphokinase 2	P11908	PNIVLFSGSSHQDLSQR	17	1883.95	1.354e-05	109.38	4974400	1	18.3453	21.0255	18.7178	19.8917	18.715	19.3592	0.0149937	1	-0.0409495	-0.0194568
734	PRPS2;PRPS1;PRPS1L1	Ribose-phosphate pyrophosphokinase 2;Ribose-phosphate pyrophosphokinase 1;Ribose-phosphate pyrophosphokinase 3	P11908;P60891;P21108	VYAILTHGIFSGPAISR	17	1800.99	3.1956e-12	162.4	84842000	12	23.3974	25.1534	23.1344	22.5821	22.7582	23.7279	0.528186	1	-0.872356	-0.452708
735	PSAT1	Phosphoserine aminotransferase	Q9Y617	NVGSAGVTVVIVR	13	1269.74	3.8902e-08	143.61	12162000	3	19.7074	21.6814	21.18	19.7354	19.7915	21.8525	0.163084	1	-0.396485	-0.187517
736	PSMA1	Proteasome subunit alpha type;Proteasome subunit alpha type-1	B4DEV8;P25786	ILHVDNHIGISIAGLTADAR	20	2085.13	2.9999e-13	151.41	60910000	13	22.3642	24.57	22.2336	22.8783	21.4653	23.845	0.11564	1	-0.32639	-0.14665
737	PSMA2	Proteasome subunit alpha type-2	P25787	LAQQYYLVYQEPIPTAQLVQR	21	2520.34	0.00052042	78.794	7092500	1	19.1195	21.6081	18.2086	19.8853	18.513	20.6807	0.0131532	1	0.0476316	0.0198706
738	PSMA7	Proteasome subunit alpha type-7	O14818	RPFGISALIVGFDFDGTPR	19	2064.08	1.8269e-13	164.01	100800000	10	23.5698	25.4157	21.8848	23.1077	23.0001	24.41	0.0356385	1	-0.117476	-0.0507289
739	PSMB1	Proteasome subunit beta type-1	P20618	AMTTGAIAAMLSTILYSR	18	1869.97	9.5151e-24	212.17	238040000	32	24.9173	26.3342	24.2559	24.5686	24.5049	25.6604	0.132012	1	-0.257834	-0.134386
740	PSMB2	Proteasome subunit beta type-2	P49721	APFAAHGYGAFLTLSILDR	19	2019.06	3.0526e-13	156.11	205900000	10	24.6341	26.4482	23.1378	24.1608	24.4871	25.1331	0.0503127	1	-0.146334	-0.0665508
741	PSMB2	Proteasome subunit beta type-2	P49721	APFAAHGYGAFLTLSILDRYYTPTISR	27	3000.55	9.4896e-16	173.47	45512000	2	21.5761	24.3825	19.3948	23.0249	23.4285	17.4433	0.0704639	1	-0.485566	-0.13446
742	PSMB2	Proteasome subunit beta type-2	P49721	FILNLPTFSVR	11	1305.74	3.6868e-07	149.72	44906000	6	22.5657	23.8348	22.7007	21.7845	21.8274	23.1924	0.553263	1	-0.76562	-0.422311
743	PSMB3	Proteasome subunit beta type-3	P49720	LYIGLAGLATDVQTVAQR	18	1888.04	2.1433e-12	157.68	27855000	6	21.4466	23.2146	21.9031	21.3494	21.3468	22.5171	0.274771	1	-0.450335	-0.24241
744	PSMD1	26S proteasome non-ATPase regulatory subunit 1	Q99460	AAVESLGFILFR	12	1321.74	4.5422e-06	126.07	14194000	1	19.8502	23.074	19.4013	19.1615	19.7343	21.1125	0.234639	1	-0.772387	-0.309756
745	PSMD1	26S proteasome non-ATPase regulatory subunit 1	Q99460	FGAILAQGILDAGGHNVTISLQSR	24	2437.31	1.7382e-09	134.34	69834000	8	23.1346	23.5411	22.4748	22.4278	24.2914	23.9686	0.321623	1	0.512424	0.276452
746	PSMD12	26S proteasome non-ATPase regulatory subunit 12	O00232	SVVLYVILAPFDNEQSDLVHR	21	2413.26	1.0996e-13	162.33	65561000	7	23.1846	24.7308	21.6755	22.5886	23.0995	23.1856	0.0947694	1	-0.239084	-0.113769
747	PSMD13	26S proteasome non-ATPase regulatory subunit 13	Q9UNM6	VNPLSLVEIILHVVR	15	1700.03	3.8633e-11	152.55	487360000	6	24.4861	27.91	24.9742	22.8719	26.0064	26.6264	0.146407	1	-0.62185	-0.223756
748	PSMD14	26S proteasome non-ATPase regulatory subunit 14	O00487	HYYSITINYR	10	1328.65	1.8803e-09	186.3	96652000	14	23.5147	24.295	24.3372	22.8023	22.257	24.8653	0.369888	1	-0.740784	-0.363467
749	PSMD2	26S proteasome non-ATPase regulatory subunit 2	Q13200	AVPLALALISVSNPR	15	1519.91	0.0039114	71.692	7198900	1	19.8147	21.8802	15.8	19.4312	19.7126	19.5977	0.0822212	1	0.415553	0.139126
750	PSMD2	26S proteasome non-ATPase regulatory subunit 2	Q13200	FAADIISVLAMTMSGER	17	1810.9	0.029748	56.746	4048600	1	18.6037	21.0397	17.15	18.767	18.7135	19.2386	0.00708986	1	-0.024765	-0.010552
751	PSMD2	26S proteasome non-ATPase regulatory subunit 2	Q13200	LGSIFGLGLAYAGSNR	16	1594.85	1.4055e-11	154.66	19053000	3	21.3077	21.9526	21.3917	20.1853	20.2847	22.7751	0.208409	1	-0.468979	-0.226445
752	PSMD2	26S proteasome non-ATPase regulatory subunit 2	Q13200	SHYVLYGLVAAMQPR	15	1703.88	4.3783e-05	98.942	19752000	5	21.5395	22.9509	20.3684	19.99	20.2658	22.2362	0.313581	1	-0.78896	-0.354047
753	PSMD3	26S proteasome non-ATPase regulatory subunit 3	O43242	HDADGQATLLNLLLR	15	1648.89	0.0044185	73.758	5831300	0	19.1624	20.9691	20.0764	20.5183	19.1569	18.2472	0.380602	1	-0.761861	-0.373253
754	PSMD3	26S proteasome non-ATPase regulatory subunit 3	O43242	SLMPYFLLTQAVR	13	1537.83	0.00032195	93.821	8316300	1	19.964	22.322	17.801	19.2326	19.2769	19.6083	0.191881	1	-0.656377	-0.261415
755	PSMD7	26S proteasome non-ATPase regulatory subunit 7	P51665	TNDQMVVVYLASLIR	15	1720.92	2.1169e-06	120.54	8774300	1	19.6732	22.3543	18.364	18.9551	17.5645	20.723	0.284412	1	-1.04963	-0.390472
756	PSMD7	26S proteasome non-ATPase regulatory subunit 7	P51665	VVVHPLVLLSVVDHFNR	17	1942.12	3.4253e-12	161.84	88661000	13	23.1071	25.0864	22.2617	21.5054	23.1278	24.6773	0.111394	1	-0.381582	-0.156345
757	PSMD8	26S proteasome non-ATPase regulatory subunit 8	P48556	EQLPESAYMHQLLGLNLLFLLSQNR	25	2926.54	8.3371e-10	139.79	77948000	13	23.3317	24.3309	22.5421	23.5138	23.4067	24.0262	0.169299	1	0.247322	0.141187
758	PSME3	Proteasome activator complex subunit 3	P61289	MWVQLLIPR	9	1154.66	1.8277e-07	174.21	16802000	5	20.6733	22.495	21.7485	15.5279	20.9609	21.7826	0.472366	1	-2.2151	-0.685297
759	PSME4	Proteasome activator complex subunit 4	Q14997	FEHIGIGLLSLLLR	14	1579.94	1.5586e-06	120.87	17584000	4	21.282	22.5302	20.5095	20.9628	21.0576	21.6355	0.13049	1	-0.221954	-0.121611
760	PSMG4	Proteasome assembly chaperone 4	Q5JS54	LTDSLFLWVGATPHLR	16	1824.99	0.0010528	87.824	6267000	1	19.669	21.2735	18.6493	19.0108	19.7147	20.0674	0.11756	1	-0.266344	-0.13156
761	PSMG4	Proteasome assembly chaperone 4	Q5JS54	LWEQLVHFHVMR	12	1593.82	0.054313	48.004	6701300	1	20.5606	17.861	17.7356	20.8469	16.5071	21.5986	0.194977	1	0.931824	0.307033
762	PSPH	Phosphoserine phosphatase	P78330	NVQVFLISGGFR	12	1335.73	4.9759e-06	123.88	6256300	1	19.6467	21.3658	18.7441	19.2293	19.5771	19.7753	0.190987	1	-0.391623	-0.197258
763	PTBP1	Polypyrimidine tract-binding protein 1	P26599	IAIPGLAGAGNSVLLVSNLNPER	23	2274.27	1.9318e-09	135.49	18580000	2	20.6061	23.1081	20.1906	21.4523	20.1577	21.3684	0.11158	1	-0.30883	-0.140213
764	PTBP1	Polypyrimidine tract-binding protein 1	P26599	VTPQSLFILFGVYGDVQR	18	2038.09	8.2434e-25	226.88	252250000	19	25.2571	26.8392	22.5267	24.332	24.1215	25.4761	0.060341	1	-0.231135	-0.0914306
765	PTGFRN	Prostaglandin F2 receptor negative regulator	Q9P2B2	FTVSWYYR	8	1120.53	2.4389e-05	148.07	3711600	1	19.8812	20.9239	19.4088	17.0158	15.8853	16.9226	2.41474	0.116	-3.4634	-1.95029
766	PTOV1;MED25	Prostate tumor-overexpressed gene 1 protein;Mediator of RNA polymerase II transcription subunit 25	Q86YD1;Q71SY5	LIMQLIPQQLLTTLGPLFR	19	2194.29	5.4566e-09	123.02	11856000	4	20.877	21.8895	19.2506	20.5007	21.1427	20.6301	0.036504	1	0.0854708	0.0428806
767	PTPN11	Tyrosine-protein phosphatase non-receptor type 11	Q06124	FIYMAVQHYIETLQR	15	1910.97	4.4956e-06	119.32	45673000	6	22.7897	23.726	21.972	21.5817	21.6596	23.7372	0.226481	1	-0.503092	-0.243168
768	PYGM;PYGL	Glycogen phosphorylase, muscle form;Glycogen phosphorylase, liver form	P11217;P06737	DYYFALAHTVR	11	1354.67	0.035251	55.452	5935200	1	19.2914	21.3825	19.6135	19.8641	19.4298	16.5664	0.532198	1	-1.47571	-0.609354
769	QARS	Glutamine--tRNA ligase	P47897	ATGILLYGLASR	12	1233.71	0.00012398	103.34	5786700	1	19.1522	21.1523	19.3119	19.2492	18.8144	20.1187	0.253892	1	-0.478013	-0.245443
770	QTRT1	Queuine tRNA-ribosyltransferase	Q9BXR0	AFLHALLHSDNTAALHHLTVHNIAYQLQLMSAVR	34	3805	2.5299e-67	305.42	102680000	1	19.7092	23.5375	23.9496	21.7708	25.8431	23.2051	0.268144	1	1.20759	0.402349
771	RAB3GAP2	Rab3 GTPase-activating protein non-catalytic subunit	Q9H2M9	VAQFLVIYAPR	11	1275.73	0.001652	87.308	3881900	0	18.7761	21.0278	18.6455	17.7	17.6146	19.3585	0.585601	1	-1.25876	-0.582974
772	RAB7A	Ras-related protein Rab-7a	P51149	FQSLGVAFYR	10	1186.61	3.6277e-15	226.68	24687000	7	21.6673	22.8956	21.7283	21.6841	21.3698	21.9316	0.431646	1	-0.435259	-0.266792
773	RABGGTB	Geranylgeranyl transferase type-2 subunit beta	P53611	MSGIYWGLTVMDLMGQLHR	19	2207.07	1.3183e-05	107.98	20920000	4	21.0378	22.5265	20.2092	20.3714	20.8821	22.9714	0.0493872	1	0.150427	0.067003
774	RABL6	Rab-like protein 6	Q3YEC7	FFNIPFLQLQR	11	1421.78	0.0018581	91.069	8585600	1	19.8558	21.6244	18.8518	20.5864	19.3867	20.6723	0.0389756	1	0.10449	0.0495096
775	RAN	GTP-binding nuclear protein Ran	P62826	PFLWLAR	7	901.517	3.0054e-09	195.41	310090000	15	25.4638	26.106	25.4349	25.2304	25.7994	25.5304	0.209591	1	-0.14817	-0.100534
776	RAN	GTP-binding nuclear protein Ran	P62826	YVATLGVEVHPLVFHTNR	18	2051.1	3.1474e-13	172.24	543240000	27	25.4081	27.0445	26.6454	25.7692	25.4637	27.1781	0.115208	1	-0.229004	-0.119145
777	RAP1GDS1	Rap1 GTPase-GDP dissociation stimulator 1	P52306	VLSWIPSNNHQLQLAGALAIANFAR	25	2703.46	3.235e-14	153.19	28617000	4	22.3959	23.3882	19.5112	22.1187	17.8945	22.701	0.170311	1	-0.860434	-0.276722
778	RARS	Arginine--tRNA ligase, cytoplasmic	P54136	GNTAAYLLYAFTR	13	1459.75	4.0159e-05	110.86	33852000	6	21.9519	24.2452	19.8659	20.96	21.1448	22.1321	0.175405	1	-0.608712	-0.241941
779	RASA1	Ras GTPase-activating protein 1	P20936	RPGSFVLSFLSQMNVVNHFR	20	2334.21	0.0011831	86.727	8035100	1	20.1093	20.25	19.9444	18.2487	19.7682	21.7155	0.0658797	1	-0.190418	-0.0862718
780	RBBP7	Histone-binding protein RBBP7	Q16576	DYALHWLVLGTHTSDEQNHLVVAR	24	2773.39	2.0368e-100	373.94	61849000	8	22.1283	25.157	21.7624	21.8059	21.4694	23.2134	0.286685	1	-0.853003	-0.35526
781	RBM23;RBM39	Probable RNA-binding protein 23;RNA-binding protein 39	Q86U06;Q14498	LYVGSLHFNITEDMLR	16	1906.96	0.04145	53.828	11346000	2	19.3005	22.3923	20.615	20.2085	19.5114	20.6371	0.273358	1	-0.650272	-0.301891
782	RBM3	RNA-binding protein 3	P98179	GFGFITFTNPEHASVAMR	18	1980.95	0.001637	69.522	9653300	1	20.1618	22.0082	19.5131	20.1899	19.6533	20.5099	0.219121	1	-0.443334	-0.222994
783	RCC1	Regulator of chromosome condensation	P18754	VFLWGSFR	8	1010.53	2.3332e-13	213.18	96300000	11	23.8002	24.7721	23.7401	23.189	23.6751	23.9381	0.558001	1	-0.50337	-0.314604
784	RCC2	Protein RCC2	Q9P258	GQLLIFGATNWDLIGR	16	1772.96	8.2095e-23	202.81	49449000	7	22.6632	24.3035	20.7848	21.7502	21.5679	23.7033	0.0694478	1	-0.243343	-0.10035
785	RCC2	Protein RCC2	Q9P258	TLDGIFSEQVAMGYSHSLVIAR	22	2393.2	1.3885e-13	148.91	15714000	2	20.5226	22.627	19.4772	21.1851	20.4078	21.621	0.0689493	1	0.195716	0.0892913
786	RCC2	Protein RCC2	Q9P258	VFSWGFGGYGR	11	1231.58	1.3333e-10	190.26	213570000	8	25.1929	25.8119	24.4944	24.5623	24.6857	25.2861	0.295433	1	-0.321696	-0.19599
787	REPIN1	Replication initiator 1	Q9BWE0	HFPGWVALWLHTR	13	1618.85	3.7811e-08	140.45	22538000	5	21.9785	22.8351	17.7296	20.7361	21.6477	22.4901	0.178006	1	0.776903	0.271851
788	RFC2	Replication factor C subunit 2	P35250	ILAHLWHLGYSPEDIIGNIFR	21	2463.31	6.4951e-44	259.38	865960000	28	26.4521	28.0101	25.2388	27.045	27.141	27.4054	0.319055	1	0.63015	0.313621
789	RFC5	Replication factor C subunit 5	P40937	GLALHDILTEIHLFVHR	17	1983.11	1.0902e-12	170.49	193260000	13	23.7197	25.4939	24.4754	24.8992	25.1655	25.2514	0.443933	1	0.542365	0.314443
790	RFC5	Replication factor C subunit 5	P40937	IQLSSLIAAFQVTR	14	1545.89	1.8279e-10	150.68	30952000	4	21.6353	23.6562	21.1651	21.5446	21.5354	22.5223	0.125398	1	-0.284751	-0.140177
791	RGPD4;RGPD3;RGPD5;RGPD8;RANBP2	RanBP2-like and GRIP domain-containing protein 4;RanBP2-like and GRIP domain-containing protein 3;RANBP2-like and GRIP domain-containing protein 5/6;RANBP2-like and GRIP domain-containing protein 8;E3 SUMO-protein ligase RanBP2	Q7Z3J3;A6NKT7;Q99666;O14715;P49792	AHNGSLQHLTWLGLQWNSLPALPGIR	26	2878.54	2.1151e-06	107.74	28941000	5	21.6594	23.2904	20.0803	22.001	22.0947	22.4133	0.203472	1	0.492982	0.230897
792	RGPD4;RGPD3;RGPD5;RGPD8;RANBP2;RGPD1;RGPD2	RanBP2-like and GRIP domain-containing protein 4;RanBP2-like and GRIP domain-containing protein 3;RANBP2-like and GRIP domain-containing protein 5/6;RANBP2-like and GRIP domain-containing protein 8;E3 SUMO-protein ligase RanBP2;RANBP2-like and GRIP domain-containing protein 1;RANBP2-like and GRIP domain-containing protein 2	Q7Z3J3;A6NKT7;Q99666;O14715;P49792;P0DJD0;P0DJD1	SVVSYWNLALIFHR	14	1703.91	1.6239e-05	113.65	29776000	4	21.8108	23.5728	20.5192	20.799	21.8766	22.6193	0.0686757	1	-0.202624	-0.0908332
793	RIC8A	Synembryn-A	Q9NPQ8	LLFLLTALR	9	1058.69	0.00063029	121.62	6191300	1	19.4272	21.2252	19.7587	18.2585	19.6096	19.9801	0.489033	1	-0.854363	-0.435712
794	RIPK2	Receptor-interacting serine/threonine-protein kinase 2	O43353	TFEEITFLEAVIQLK	15	1894.01	0.032071	63.283	8857800	1	20.8179	21.5148	19.1611	19.6163	20.4845	20.1407	0.219027	1	-0.417409	-0.214906
795	RNF123	E3 ubiquitin-protein ligase RNF123	Q5XPI4	GQPTVLLTLAHIFHHFAPLLR	21	2380.35	4.51e-09	124.26	23241000	3	21.4665	22.174	20.6736	21.1109	21.1437	23.1576	0.172361	1	0.366041	0.182682
796	RNH1	Ribonuclease inhibitor	P13489	FLLELQISNNR	11	1345.74	2.1481e-10	183.57	14883000	4	20.5775	21.8653	21.2231	20.093	21.6248	21.3634	0.11793	1	-0.194914	-0.108186
797	RNPEP	Aminopeptidase B	Q9H4A4	AFELLHLHLDLR	12	1475.82	0.00075356	91.858	63412000	7	21.7363	22.2012	22.6035	22.7228	25.0418	22.7915	0.768364	1	1.33836	0.668528
798	RNPEP	Aminopeptidase B	Q9H4A4	LFGPYVWGR	9	1093.57	0.00063498	121.29	23691000	6	22.0966	22.442	22.0589	21.0779	21.6551	21.7887	1.29792	1	-0.691971	-0.477268
799	RNPEP	Aminopeptidase B	Q9H4A4	LQVLLTYR	8	1004.6	1.7575e-05	153.73	16519000	6	20.2698	21.8596	21.5734	21.0826	21.1956	21.8215	0.0868606	1	0.132271	0.0759945
800	ROCK1	Rho-associated protein kinase 1	Q13464	AFVGNQLPFVGFTYYSNR	18	2079.02	0.047769	44.662	2282000	0	18.9457	19.9498	17.6081	17.8298	17.9183	18.1139	0.573369	1	-0.880556	-0.467526
801	ROCK1	Rho-associated protein kinase 1	Q13464	FYTAEVVLALDAIHSMGFIHR	21	2389.23	0.00059422	76.301	8825400	2	19.4083	21.7951	19.2915	19.9658	19.875	20.8295	0.0224137	1	0.0584437	0.0282254
802	RPA2	Replication protein A 32 kDa subunit	P15927	IGNVEISQVTIVGIIR	16	1710	1.0198e-11	160.15	8810100	1	19.6043	21.7781	19.8522	19.3916	19.8027	20.8331	0.190235	1	-0.402421	-0.200229
803	RPL10L;RPL10	60S ribosomal protein L10-like;60S ribosomal protein L10	Q96L21;P27635	VHIGQVIMSIR	11	1251.71	7.3655e-06	121.6	98732000	23	23.1109	24.9187	23.9863	23.6307	23.3231	24.0899	0.222918	1	-0.324074	-0.18335
804	RPL11	60S ribosomal protein L11	P62913	LCLNICVGESGDR	13	1491.68	1.9458e-08	145.89	18886000	5	19.8914	22.0797	21.3412	21.7042	21.7179	21.9162	0.449691	1	0.675384	0.365788
805	RPL11	60S ribosomal protein L11	P62913	PGFSIADKKR	10	1345.71	0.00046158	105.2	7131000	2	20.7787	17.0826	21.2669	19.2463	19.7547	20.3126	0.0150928	1	0.0617968	0.0241736
806	RPL12	60S ribosomal protein L12	P30050	HSGNITFDEIVNIAR	15	1684.85	3.1298e-05	105.46	6878500	1	18.7533	21.0378	19.5179	20.4589	18.2718	20.7596	0.0194941	1	0.0604521	0.0270821
807	RPL13A	60S ribosomal protein L13a	P40429	AEVQVLVLDGR	11	1197.67	4.3917e-06	129.7	9583900	3	19.8446	20.8545	20.7297	20.456	20.5305	20.9704	0.189123	1	0.176048	0.113134
808	RPL15	60S ribosomal protein L15	P61313	NPDTQWITKPVHKHR	15	2084.07	5.6167e-06	119.32	13561000	5	21.8173	21.8044	22.4422	18.9427	17.3533	18.0841	2.8168	0	-3.89459	-2.28384
809	RPL18	60S ribosomal protein L18	Q07020	TAVVVGTITDDVR	13	1344.72	7.0978e-08	139.86	6669700	2	18.7025	21.6251	19.8234	16.9971	17.5938	20.9888	0.432902	1	-1.52374	-0.56296
810	RPL18A	60S ribosomal protein L18a	Q02543	NFGIWLR	7	904.492	0.00078712	132.01	40271000	12	22.4923	23.1074	23.1406	21.9573	22.5443	22.4918	0.966668	1	-0.582284	-0.392869
811	RPL19	60S ribosomal protein L19	P84098	KLIKDGLIIR	10	1395.86	0.0016369	93.111	3569800	1	19.5975	17.7166	20.6798	17.9248	18.3154	18.9932	0.427167	1	-0.920109	-0.433963
812	RPL24	60S ribosomal protein L24	P83731	QINWTVLYR	9	1191.64	5.0236e-09	187.55	49552000	11	22.7452	24.2487	22.4441	22.0686	22.1204	22.9179	0.55316	1	-0.777028	-0.426433
813	RPL27	60S ribosomal protein L27	P61353	NIDDGTSDRPYSHALVAGIDR	21	2271.09	0.0053913	65.784	7986300	2	18.7749	20.8476	20.0407	20.7035	17.0441	21.45	0.0352722	1	-0.155222	-0.0577243
814	RPL27	60S ribosomal protein L27	P61353	VVLVLAGR	8	825.544	0.0011016	113.08	9558500	3	19.6937	21.2719	20.5469	20.0973	20.0634	21.212	0.0263935	1	-0.0465984	-0.0260042
815	RPL27	60S ribosomal protein L27	P61353	YSVDIPLDKTVVNKDVFR	18	2335.22	0.00042233	89.982	6930900	1	20.6692	20.4176	21.5563	18.8966	17.778	19.0803	1.89866	0.770667	-2.29608	-1.32434
816	RPL28	60S ribosomal protein L28	P46779	SAHLQWMVVR	10	1225.64	1.3547e-05	145.17	27476000	9	21.164	23.1151	21.7297	21.8792	21.3758	22.5129	0.0410089	1	-0.0803057	-0.0430267
817	RPL29	60S ribosomal protein L29	P47914	YESLKGVDPKFLR	13	1778.93	0.0012544	91.858	7016900	1	20.9036	20.9058	21.52	17.0965	16.3483	17.6055	3.21187	0	-4.093	-2.52848
818	RPL4	60S ribosomal protein L4	P36578	APIRPDIVNFVHTNLR	16	1861.03	0.044678	52.522	15472000	2	20.5459	22.0818	20.6276	21.6833	19.8374	21.7706	0.00489484	1	0.0120138	0.00599514
819	RPL4	60S ribosomal protein L4	P36578	FCIWTESAFR	10	1315.6	2.8216e-09	178.83	15713000	4	20.9132	22.2943	20.9101	20.7091	20.5626	21.6808	0.268162	1	-0.388339	-0.21826
820	RPL5	60S ribosomal protein L5	P46777	VGLTNYAAAYCTGLLLAR	18	1926	9.2171e-10	147.7	21359000	2	20.1255	23.7476	18.9192	21.4047	19.0253	21.149	0.0878725	1	-0.404428	-0.14265
821	RPL6	60S ribosomal protein L6	Q02878	AIPQLQGYLR	10	1157.66	0.00042938	104.21	7386800	2	18.5269	20.6665	19.8657	20.924	18.5565	20.9418	0.170287	1	0.454398	0.205752
822	RPL6	60S ribosomal protein L6	Q02878	ASITPGTILIILTGR	15	1524.92	1.4219e-22	205.37	268870000	26	24.6931	27.2608	24.1825	23.9671	23.0539	25.1329	0.517171	1	-1.32748	-0.570577
823	RPL6	60S ribosomal protein L6	Q02878	QLASGLLLVTGPLVLNR	17	1763.07	2.8855e-38	278.41	54305000	12	22.5015	24.464	22.5937	22.1232	21.5623	23.4209	0.411891	1	-0.817588	-0.400068
824	RPL7	60S ribosomal protein L7	P18124	IALTDNALIAR	11	1169.68	3.1367e-10	175.44	5783700	2	16.8518	20.0794	18.9138	20.9285	17.4042	20.8532	0.302505	1	1.11365	0.412889
825	RPL7A	60S ribosomal protein L7a	P62424	AQLVVIAHDVDPIELVVFLPALCR	24	2686.49	8.8568e-05	91.729	6827900	1	20.7399	22.1319	18.8756	18.0393	18.7369	17.7352	1.14717	1	-2.412	-1.10198
826	RPL9	60S ribosomal protein L9	P32969	KFLDGIYVSEKGTVQQADE	19	2354.14	0.00013279	93.152	9079800	2	20.5024	21.1688	21.2365	19.9399	19.698	19.7951	2.04272	1	-1.15826	-0.801806
827	RPL9	60S ribosomal protein L9	P32969	MKTILSNQTVDIPENVDITLKGR	23	2812.48	6.6634e-06	102.66	41134000	10	22.5499	23.5631	23.0891	22.5461	22.114	21.5227	1.13579	1	-1.00642	-0.622509
828	RPL9	60S ribosomal protein L9	P32969	SVYAHFPINVVIQENGSLVEIR	22	2483.32	3.4617e-14	168.27	31617000	6	22.0049	22.8745	21.931	21.6252	22.7447	22.38	0.014961	1	-0.0202217	-0.0122728
829	RPN1	Dolichyl-diphosphooligosaccharide--protein glycosyltransferase subunit 1	P04843	VTAEVVLAHLGGGSTSR	17	1652.88	2.4381e-05	99.569	7476900	1	19.2833	21.3235	20.8005	20.5316	19.7349	17.0837	0.487067	1	-1.35235	-0.56149
830	RPN2	Dolichyl-diphosphooligosaccharide--protein glycosyltransferase subunit 2	P04844	GTFIADSHQNFALFFQLVDVNTGAELTPHQTFVR	34	3819.9	1.0504e-08	104.98	7783400	1	20.1127	21.1147	17.5271	20.3254	20.232	20.6492	0.309927	1	0.817359	0.359088
831	RPRD1A;RPRD1B	Regulation of nuclear pre-mRNA domain-containing protein 1A;Regulation of nuclear pre-mRNA domain-containing protein 1B	Q96P16;Q9NQG5	LSELSNSQQSVQTLSLWLIHHR	22	2575.35	8.8761e-14	158.65	33891000	5	21.3866	23.6878	20.8581	20.8877	21.3417	23.4089	0.0282942	1	-0.098093	-0.0414821
832	RPS10	40S ribosomal protein S10	P46783;A0A1W2PQS6	HFYWYLTNEGIQYLR	15	2001.97	5.9275e-33	254.34	1511400000	26	27.9932	29.0651	26.268	27.3268	27.3109	27.9918	0.0985383	1	-0.232316	-0.113597
833	RPS10	40S ribosomal protein S10	P46783	SAVPPGADKKAEAGAGSATEFQFR	24	2619.27	2.0333e-20	179.41	3821100000	94	26.7469	27.0564	27.0284	30.0095	29.9562	30.2864	4.60285	0	3.14008	2.33935
834	RPS13	40S ribosomal protein S13	P62277	GLTPSQIGVILR	12	1252.75	1.1967e-07	155.07	35775000	12	21.7695	23.0497	22.9118	22.2824	22.0117	22.586	0.257429	1	-0.283659	-0.17314
835	RPS15A	40S ribosomal protein S15a	P62244	FDVQLKDLEKWQNNLLPSR	19	2570.32	6.6603e-06	98.035	26950000	4	22.78	23.7052	21.519	19.8692	19.7808	20.2035	1.8642	0.5895	-2.71691	-1.47136
836	RPS15A	40S ribosomal protein S15a	P62244;H3BN98	HGYIGEFEIIDDHR	14	1699.8	1.1243e-10	148.96	9987700	3	19.0242	21.2695	19.9992	21.2945	18.7993	21.4428	0.142877	1	0.414551	0.182139
837	RPS15A	40S ribosomal protein S15a	P62244;H3BN98	IVVNLTGR	8	870.529	0.0012376	98.997	5061500	1	19.2464	18.1727	19.9675	19.8826	19.8009	20.5492	0.761976	1	0.94873	0.535165
838	RPS15A	40S ribosomal protein S15a	P62244	QFGFIVLTTSAGIMDHEEAR	20	2221.08	2.2324e-07	120.71	106630000	19	23.0717	25.7272	22.9226	23.0532	23.0405	24.0178	0.215819	1	-0.536702	-0.247692
839	RPS15A	40S ribosomal protein S15a	P62244	QFGFIVLTTSAGIMDHEEARR	21	2377.18	0.00042226	83.063	10143000	1	19.2392	22.6727	18.6172	19.7342	20.1835	18.5114	0.198589	1	-0.700011	-0.273829
840	RPS16	40S ribosomal protein S16	P62249	GGGHVAQIYAIR	12	1240.67	0.00025275	94.297	9967500	3	19.2344	21.0585	20.3383	21.1071	19.6749	21.3886	0.274445	1	0.513134	0.263114
841	RPS18	40S ribosomal protein S18	P62269	IPDWFLNR	8	1059.55	1.9716e-05	151.17	10858000	6	20.7642	21.6193	20.9446	18.3181	20.5436	21.1389	0.546816	1	-1.10915	-0.528921
842	RPS20	40S ribosomal protein S20	P60866	AFKDTGKTPVEPEVAIHR	18	2222.14	2.5413e-12	154.49	3960100000	31	27.5948	27.8313	28.3463	29.5551	29.6118	30.5463	2.14728	0.883733	1.98025	1.24506
843	RPS24	40S ribosomal protein S24	P62847	TTPDVIFVFGFR	12	1397.73	2.1749e-05	119.07	214360000	11	24.5988	26.3702	24.2321	24.0022	24.4197	25.3668	0.239754	1	-0.470779	-0.238517
844	RPS27A	Ubiquitin-40S ribosomal protein S27a;Ubiquitin;40S ribosomal protein S27a	P62979	YYKVDENGKISR	12	1698.83	9.6041e-07	144.57	47528000	5	17.7383	18.5294	18.5028	23.7982	23.9761	23.883	4.54064	0	5.62894	3.84376
845	RPS27A;UBA52;UBB;UBC	Ubiquitin-40S ribosomal protein S27a;Ubiquitin;40S ribosomal protein S27a;Ubiquitin-60S ribosomal protein L40;Ubiquitin;60S ribosomal protein L40;Polyubiquitin-B;Ubiquitin;Polyubiquitin-C;Ubiquitin	P62979;A0A2R8Y422;P62987;P0CG47;P0CG48	ESTLHLVLR	9	1066.61	0.014393	66.27	32656000	3	21.746	22.6568	22.8304	21.8696	21.5315	22.968	0.202478	1	-0.288055	-0.164722
846	RPS27A;UBA52;UBB;UBC	Ubiquitin-40S ribosomal protein S27a;Ubiquitin;40S ribosomal protein S27a;Ubiquitin-60S ribosomal protein L40;Ubiquitin;60S ribosomal protein L40;Polyubiquitin-B;Ubiquitin;Polyubiquitin-C;Ubiquitin	P62979;A0A2R8Y422;P62987;P0CG47;P0CG48	LIFAGKQLEDGR	12	1459.78	3.7001e-06	132.17	244500000	16	24.6262	25.7199	25.7424	24.9562	24.1479	25.7405	0.28371	1	-0.414665	-0.231767
847	RPS27A;UBA52;UBB;UBC	Ubiquitin-40S ribosomal protein S27a;Ubiquitin;40S ribosomal protein S27a;Ubiquitin-60S ribosomal protein L40;Ubiquitin;60S ribosomal protein L40;Polyubiquitin-B;Ubiquitin;Polyubiquitin-C;Ubiquitin	P62979;A0A2R8Y422;P62987;P0CG47;P0CG48	TLSDYNIQKESTLHLVLR	18	2243.19	3.7159e-08	132.47	71640000	16	22.6359	23.6815	23.7888	23.5909	22.6243	24.1075	0.0432453	1	0.0721906	0.0408006
848	RPS3	40S ribosomal protein S3	P23396	FVDGLMIHSGDPVNYYVDTAVR	22	2467.18	4.309e-09	122.53	21345000	3	20.7772	23.1774	20.7399	21.6649	17.7448	22.2495	0.245704	1	-1.01179	-0.357782
849	RPS3	40S ribosomal protein S3	P23396	KFVADGIFKAELNEFLTR	18	2325.21	3.8269e-08	123.14	9166100	2	21.1628	21.9897	20.1734	19.1541	18.4403	19.7603	1.42711	1	-1.99041	-1.07649
850	RPS3	40S ribosomal protein S3	P23396	TEIIILATR	9	1028.62	0.00041124	131.06	15903000	6	20.1406	22.4403	21.0686	20.8778	20.2126	21.8248	0.108458	1	-0.244769	-0.121445
851	RPS4X	40S ribosomal protein S4, X isoform	P62701	LRECLPLIIFLR	12	1541.91	0.00018542	96.745	13387000	2	20.028	23.0657	18.9414	19.9109	19.7087	20.185	0.235349	1	-0.7435	-0.304478
852	RPS4X;RPS4Y2;RPS4Y1	40S ribosomal protein S4, X isoform;40S ribosomal protein S4, Y isoform 2;40S ribosomal protein S4, Y isoform 1	P62701;Q8TD47;P22090	VAAPKHWMLDKLTGVFAPR	19	2364.25	0.02631	57.52	12011000	3	21.7281	21.556	21.2957	19.1265	19.9223	20.3249	2.01226	1	-1.73536	-1.10261
853	RPS5	40S ribosomal protein S5;40S ribosomal protein S5, N-terminally processed	P46782	HAFEIIHLLTGENPLQVLVNAIINSGPR	28	3064.68	7.142e-94	334.49	5620700000	12	30.4864	31.0654	28.5916	29.1425	27.7855	29.2555	0.678615	1	-1.31999	-0.63345
854	RPS5	40S ribosomal protein S5;40S ribosomal protein S5, N-terminally processed	P46782	HAFEIIHLLTGENPLQVLVNAIINSGPREDSTR	33	3652.93	4.799e-80	324.97	78758000	3	22.125	25.7497	18.2785	23.4383	22.2139	20.5482	0.00221966	1	0.0157286	0.00447605
855	RPS5	40S ribosomal protein S5;40S ribosomal protein S5, N-terminally processed	P46782	RVNQAIWLLCTGAR	14	1656.89	0.0030252	78.814	3621100	1	17.9823	21.075	17.5831	19.0091	18.597	17.8045	0.129961	1	-0.409906	-0.173784
856	RPS6KA1	Ribosomal protein S6 kinase alpha-1	Q15418	FYLAELALGLDHLHSLGIIYR	21	2413.32	1.0928e-06	117.74	27135000	4	21.4155	23.5158	17.1295	20.8503	22.5907	21.98	0.224806	1	1.1201	0.355912
857	RPS6KA1;RPS6KA6;RPS6KA3;RPS6KA2	Ribosomal protein S6 kinase alpha-1;Ribosomal protein S6 kinase alpha-6;Ribosomal protein S6 kinase alpha-3;Ribosomal protein S6 kinase alpha-2	Q15418;Q9UK32;P51812;Q15349	LYLILDFLR	9	1164.69	0.0084718	83.265	9447200	1	20.1957	21.428	20.2558	19.6953	20.7413	20.5833	0.215583	1	-0.286509	-0.166904
858	RPS6KA3;RPS6KA2	Ribosomal protein S6 kinase alpha-3;Ribosomal protein S6 kinase alpha-2	P51812;Q15349	FYLAELALALDHLHSLGIIYR	21	2427.33	1.088e-13	162.76	100200000	12	22.8889	24.4708	22.9175	23.6104	24.105	24.8582	0.529859	1	0.765474	0.416888
859	RPS8	40S ribosomal protein S8	P62241	QWYESHYALPLGR	13	1618.79	0.021158	62.14	20312000	5	21.1874	22.3237	21.223	21.7928	20.4212	22.3071	0.0355882	1	-0.0709947	-0.0378596
860	RPS9	40S ribosomal protein S9	P46781	LFEGNALLR	9	1031.58	0.00072237	114.6	5218400	2	17.5195	20.0232	19.0322	20.5454	18.1365	20.619	0.344291	1	0.908659	0.396244
861	RPSA	40S ribosomal protein SA	P08865	FTPGTFTNQIQAAFR	15	1697.85	3.715e-19	219.03	21637000	3	21.5872	23.1068	20.8709	21.0249	20.4448	21.9225	0.387745	1	-0.724229	-0.364491
862	RPSA	40S ribosomal protein SA	P08865	GAHSVGLMWWMLAR	14	1613.8	9.3026e-11	153.34	640100000	71	26.6167	27.9125	25.164	25.3945	26.1846	26.9157	0.165911	1	-0.399445	-0.189558
863	RRM1	Ribonucleoside-diphosphate reductase large subunit	P23921	HRPIGIGVQGLADAFILMR	19	2063.15	3.9891e-05	94.01	31230000	6	21.4051	23.5215	21.3727	22.0312	21.7868	22.4657	0.00230222	1	-0.00520325	-0.0026847
864	RRM2	Ribonucleoside-diphosphate reductase subunit M2	A0A286YFD6;P31350	YFISHVLAFFAASDGIVNENLVER	24	2710.38	3.2743e-14	157.28	20079000	5	21.6986	22.507	18.7119	21.9449	21.3721	21.7529	0.242827	1	0.717515	0.303218
865	RRP1	Ribosomal RNA processing protein 1 homolog A	P56182	TISQLVHAFQTTEAQHLFLQAFWQTMNR	28	3345.67	5.879e-10	129.57	68362000	8	22.9933	24.3079	21.4049	22.8746	23.385	24.0872	0.236428	1	0.546919	0.259215
866	RUVBL2	RuvB-like 2	Q9Y230	EVVHTVSLHEIDVINSR	17	1946.02	0.059399	44.567	4289900	1	17.3443	20.8341	18.4739	19.8195	17.654	19.5331	0.0323299	1	0.118083	0.0485508
867	SACM1L	Phosphatidylinositide phosphatase SAC1	Q9NTJ5	TFLAMLNHVLNVDGFYFSTTYDLTHTLQR	29	3416.69	1.0834e-10	143.8	16728000	4	21.05	22.1514	19.6475	17.959	22.0129	22.2083	0.0489072	1	-0.222907	-0.0806727
868	SBF1	Myotubularin-related protein 5	O95248	LADYFVLVAFGPHPR	15	1700.9	3.8896e-05	101.53	4727500	1	19.3571	20.9342	18.1378	18.1492	18.7206	19.9898	0.207536	1	-0.523148	-0.240502
869	SCAMP3	Secretory carrier-associated membrane protein 3	O14828	NYGSYSTQASAAAATAELLKKQEELNR	27	3141.53	1.3558e-09	127.14	40275000	7	22.7636	23.3738	21.7061	22.8275	21.9914	22.7897	0.0480811	1	-0.0783316	-0.0445502
870	SCD	Acyl-CoA desaturase	O00767	EKGSTLDLSDLEAEKLVMFQR	21	2636.31	0.00052728	80.238	12497000	2	20.7198	22.2269	20.5012	20.0066	19.9637	21.1341	0.516032	1	-0.78113	-0.419025
871	SCD	Acyl-CoA desaturase	O00767	GFFFSHVGWLLVR	13	1563.84	2.4141e-10	155.42	42696000	6	19.4512	24.5761	18.751	22.0774	19.8799	23.4087	0.15308	1	0.862556	0.261004
872	SCD	Acyl-CoA desaturase	O00767	RGFFFSHVGWLLVR	14	1719.94	3.4094e-05	106.32	20369000	4	20.2421	23.3619	19.7978	18.8715	21.3085	22.0562	0.0939337	1	-0.388561	-0.145142
873	SCFD1	Sec1 family domain-containing protein 1	Q8WVM8	NIDLATPLHHTWTYQALVHDVLDFHLNR	28	3338.69	0.022361	53.259	76056000	1	22.1843	23.9268	23.4289	23.2505	22.4625	24.7539	0.134159	1	0.308966	0.150812
874	SDAD1	Protein SDA1 homolog	Q9NVU7	LVGIHELFLFNFYPFLQR	18	2252.21	0.00068682	84.508	13807000	2	21.0732	21.8997	19.4985	19.5408	20.2923	22.2246	0.0441824	1	-0.137881	-0.0608652
875	SDF2L1	Stromal cell-derived factor 2-like protein 1	Q9HCN8	FQHVGTSVFLSVTGEQYGSPIR	22	2408.21	1.1622e-07	121.21	10636000	1	20.0029	22.2187	19.0452	19.9894	20.089	20.9372	0.0285196	1	-0.083746	-0.0382974
876	SDHA	Succinate dehydrogenase [ubiquinone] flavoprotein subunit, mitochondrial	P31040	LGANSLLDLVVFGR	14	1472.84	1.8408e-07	125.74	5734800	1	18.9517	21.1366	18.7275	19.2091	18.921	20.4023	0.0358516	1	-0.0944818	-0.0451585
877	SDHC	Succinate dehydrogenase cytochrome b560 subunit, mitochondrial	Q99643	FALVFPLMYHTWNGIR	16	1964.01	9.3519e-08	123.29	74108000	10	23.3229	24.6678	21.4132	21.9021	22.5711	24.5176	0.0380693	1	-0.137729	-0.0567347
878	SEC13	Protein SEC13 homolog	P55735	GHEGPVWQVAWAHPMYGNILASCSYDR	27	3100.41	0.00013338	83.362	8113000	1	19.8096	21.7118	19.2753	19.8896	19.4162	20.4715	0.159349	1	-0.339751	-0.169886
879	SEC16A	Protein transport protein Sec16A	O15027	SILTQPHLYSPVLISQLVQMASQLR	25	2821.55	1.0666e-14	167.57	23043000	3	21.4816	22.6424	20.4009	21.4144	21.1772	22.7423	0.121521	1	0.26964	0.134151
880	SEC23A	Protein transport protein Sec23A	Q15436	FSETFSLYPQFMFHLR	16	2048.98	0.0035022	70.272	31415000	5	21.5642	23.5364	20.5354	21.6725	21.6285	22.9395	0.0720632	1	0.201493	0.0924377
881	SEC23A;SEC23B	Protein transport protein Sec23A;Protein transport protein Sec23B	Q15436;Q15437	FSWNVWPSSR	10	1264.6	0.00017279	126.31	13061000	3	21.0374	21.6759	20.367	20.414	20.7711	21.5259	0.0873695	1	-0.12307	-0.0723844
882	SEC23B	Protein transport protein Sec23B	Q15437	STGVALSIAVGLLEGTFPNTGAR	23	2230.2	0.00033004	84.166	7614200	1	20.19	21.3193	18.308	19.0755	19.8743	20.9048	0.00396094	1	0.0124149	0.00557836
883	SEC24A	Protein transport protein Sec24A	O95486	GLSIHTFHGNFFVR	14	1630.84	0.0022499	82.85	13155000	2	20.705	21.8375	20.8212	20.316	20.4198	21.5814	0.255728	1	-0.348831	-0.200232
884	SEC24A	Protein transport protein Sec24A	O95486	IIAFISWLR	9	1117.66	0.00063029	121.62	8286600	1	19.8524	21.8191	18.8762	19.3725	20.1755	20.3055	0.0901911	1	-0.231395	-0.109496
885	SEC24A	Protein transport protein Sec24A	O95486	NQPLVYLMLTTHPSLYR	17	2045.08	0.00015649	93.765	13479000	2	20.6961	22.5212	20.2129	20.25	20.6446	20.6625	0.3643	1	-0.62435	-0.325921
886	SEC24B	Protein transport protein Sec24B	O95487	LPLGLLLHPFR	11	1274.79	6.7516e-06	123.88	6030000	1	19.5262	21.2045	18.8664	18.7024	18.8777	20.4895	0.220875	1	-0.509153	-0.24259
887	SEC61A1	Protein transport protein Sec61 subunit alpha isoform 1	P61619	FSGNLLVSLLGTWSDTSSGGPAR	23	2321.17	2.2886e-06	114.37	16750000	2	21.3861	22.6142	19.7707	20.7177	20.8081	21.5798	0.0910726	1	-0.221813	-0.107279
888	SEH1L	Nucleoporin SEH1	Q96EE3	FEIHIVAQFDNHNSQVWR	18	2239.09	1.0625e-08	139.67	11923000	2	20.0434	21.9553	20.188	20.0612	20.3907	21.5696	0.0240276	1	-0.055062	-0.0280008
889	SEL1L	Protein sel-1 homolog 1	Q9UBV2	YFNLASQGGHILAFYNLAQMHASGTGVMR	29	3153.53	0.00014703	74.404	26446000	4	20.9852	23.4419	20.3135	21.7674	21.3633	22.3658	0.0901952	1	0.251966	0.114821
890	SEPTIN7	Septin-7	Q16181	STLINSLFLTDLYSPEYPGPSHR	23	2606.3	0.00037659	82.593	7748400	1	19.1162	22.352	17.9375	19.8282	16.4824	19.2989	0.307124	1	-1.26539	-0.439497
891	SERPINH1	Serpin H1	P50454	LFYADHPFIFLVR	13	1636.88	1.0294e-07	127.17	42838000	6	22.3225	24.0404	21.3412	21.872	21.9156	23.2373	0.0887478	1	-0.226444	-0.107464
892	SET	Protein SET	Q01105	IPNFWVTTFVNHPQVSALLGEEDEEALHYLTR	32	3724.85	1.1981e-110	377.06	519890000	16	25.5066	27.4764	23.6574	27.1665	24.9364	26.4155	0.1864	1	0.626012	0.252165
893	SETD3	Histone-lysine N-methyltransferase setd3	Q86TU7	AGIPTSSVFALHFTEPPISAQLLAFLR	27	2882.57	4.98e-07	116.47	7650600	1	19.9634	21.2312	17.5368	20.3275	20.4797	20.4052	0.311315	1	0.826989	0.361967
894	SF3A1	Splicing factor 3A subunit 1	Q15459	FNFLNPNDPYHAYYR	15	1929.88	4.4583e-05	98.592	15341000	4	21.7752	22.3352	20.0862	21.3262	17.4437	21.3741	0.387939	1	-1.35083	-0.506458
895	SF3B1	Splicing factor 3B subunit 1	O75533	IYNSIYIGSQDALIAHYPR	19	2193.12	4.9781e-07	119.4	8278700	1	19.8077	21.6341	19.6859	20.0175	19.5076	20.4735	0.211861	1	-0.37638	-0.19924
896	SF3B3	Splicing factor 3B subunit 3	Q15393	VHTLLTVEVFGVIR	14	1581.92	4.2963e-14	190.46	17333000	5	21.5105	22.3191	21.2717	20.3582	21.3577	21.282	0.70943	1	-0.701132	-0.424596
897	SF3B6	Splicing factor 3B subunit 6	Q9Y3B4	NLPYKITAEEMYDIFGKYGPIR	22	2845.41	0.0079181	65.097	39108000	7	22.9185	23.1394	18.0269	22.9755	22.2916	23.0291	0.345118	1	1.40378	0.486516
898	SF3B6	Splicing factor 3B subunit 6	Q9Y3B4	YLVVLYYNANR	11	1386.73	2.3111e-07	159.04	44750000	8	22.4956	24.3132	22.2633	22.1976	19.2504	22.8432	0.550314	1	-1.59362	-0.642144
899	SFPQ	Splicing factor, proline- and glutamine-rich	P23246	FATHAAALSVR	11	1142.62	0.043301	51.841	2212400	1	18.9778	20.5063	16.0345	16.448	15.6155	17.4475	0.63837	1	-2.00256	-0.765769
900	SGSH	N-sulphoglucosamine sulphohydrolase	P51688	FLQTQDDRPFFLYVAFHDPHR	21	2648.29	0.00031973	85.087	4462000	1	20.1549	20.9821	18.7307	18.9772	18.0543	17.2311	1.05952	1	-1.86836	-0.920982
901	SGTA	Small glutamine-rich tetratricopeptide repeat-containing protein alpha	O43765	LAYAIIQFLHDQLR	14	1699.94	1.5048e-32	258.92	1755200000	28	28.2465	28.8997	27.0077	27.4184	28.403	27.9904	0.0635883	1	-0.1141	-0.0625566
902	SGTA	Small glutamine-rich tetratricopeptide repeat-containing protein alpha	O43765	RLAYAIIQFLHDQLR	15	1856.04	4.0927e-11	152.16	67112000	8	22.7633	24.7839	20.123	22.9861	24.0805	21.9011	0.10464	1	0.432491	0.160844
903	SHCBP1	SHC SH2 domain-binding protein 1	Q8NEM2	FFYQNIWR	8	1172.58	0.00010697	145.87	8252500	1	20.566	20.9962	20.055	19.9006	20.0868	20.4447	0.554928	1	-0.395024	-0.26067
904	SKA1	Spindle and kinetochore-associated protein 1	Q96BD8	FHVLLNILR	9	1123.69	0.00053676	98.299	6914100	1	19.8981	17.2129	20.9621	19.6831	20.5482	20.5348	0.319436	1	0.897657	0.381715
905	SKIV2L	Helicase SKI2W	Q15477	GVYLSLLASLR	11	1190.7	0.00085614	93.598	12628000	1	20.4134	21.8734	20.5269	19.7564	20.789	21.6013	0.113513	1	-0.22232	-0.116366
906	SKIV2L2	Superkiller viralicidic activity 2-like 2	P42285	GEMQVVPVLVHLLSAISSVR	20	2133.2	0.00041268	82.504	13572000	3	20.0975	22.7088	20.0621	19.7271	18.5421	21.7922	0.293202	1	-0.935691	-0.375443
907	SKIV2L2	Superkiller viralicidic activity 2-like 2	P42285	GSADPLNSAFHLTYNMVLNLLR	22	2445.25	1.5951e-35	239.56	218190000	18	24.2088	25.8436	23.7471	24.8606	25.2263	25.7072	0.414992	1	0.664843	0.353335
908	SKP1	S-phase kinase-associated protein 1	P63208	KTFNIKNDFTEEEEAQVR	18	2425.15	1.8315e-05	97.904	14600000	4	20.8552	21.8141	21.2388	20.6158	20.9335	21.4833	0.317243	1	-0.291836	-0.185101
909	SLC12A9	Solute carrier family 12 member 9	Q9BXP2	FWRPQLLLLVGNPR	14	1707.99	2.0383e-07	125.82	19018000	4	21.0461	22.7109	20.7997	19.8105	21.3094	22.1468	0.17979	1	-0.430017	-0.203843
910	SLC16A1	Monocarboxylate transporter 1	P53985	SVFQTINQFLDLTLFTHR	18	2179.14	1.179e-23	205.78	85538000	5	24.4092	24.4094	23.7928	23.8098	18.6962	23.4844	0.592102	1	-2.20702	-0.770151
911	SLC1A5	Neutral amino acid transporter B(0)	Q15758	STEPELIQVKSELPLDPLPVPTEEGNPLLKHYR	33	3966.07	0.018541	58.11	6846100	1	20.2544	21.0885	19.0451	19.6549	19.9618	19.8993	0.184627	1	-0.290651	-0.161426
912	SLC25A6;SLC25A5	ADP/ATP translocase 3;ADP/ATP translocase 3, N-terminally processed;ADP/ATP translocase 2;ADP/ATP translocase 2, N-terminally processed	P12236;P05141	EQGVLSFWR	9	1120.57	0.0035012	91.069	6669800	1	19.5703	20.7547	19.6995	20.0938	19.4181	20.4687	0.00992107	1	-0.0146071	-0.00866903
913	SLC39A7	Zinc transporter SLC39A7	Q92504	VSGYLNLAADLAHNFTDGLAIGASFR	26	2692.36	1.6251e-14	160.47	23321000	4	21.4823	22.7805	20.8459	21.0237	21.9997	22.2468	0.0265124	1	0.0538266	0.0286191
914	SLC3A2	4F2 cell-surface antigen heavy chain	P08195	LLTSFLPAQLLR	12	1370.83	0.037548	55.549	3987500	0	18.6701	20.6007	18.8534	19.1438	18.455	19.1156	0.290029	1	-0.469941	-0.253321
915	SLC3A2	4F2 cell-surface antigen heavy chain	P08195	SLLHGDFHAFSAGPGLFSYIR	21	2291.15	1.3173e-05	94.856	15623000	2	21.0531	22.9532	17.9849	21.0443	20.6173	20.5689	0.0182083	1	0.0797176	0.0300229
916	SLC3A2	4F2 cell-surface antigen heavy chain	P08195	WWHTGALYR	9	1188.58	0.0066638	78.334	49420000	12	22.7389	23.5463	22.6748	22.1676	22.9778	23.3244	0.136137	1	-0.163368	-0.0994405
917	SLC4A2	Anion exchange protein 2	P04920	FLFLLLGPSSANMDYHEIGR	20	2279.14	5.2828e-09	121.74	18948000	1	21.2717	22.886	17.7018	21.3654	21.4848	21.5301	0.21281	1	0.840299	0.30753
918	SMARCA4	Transcription activator BRG1	P51532	TKATIELKALR	11	1470.85	0.00027145	99.215	7652500	1	19.6395	19.7547	20.5138	19.9305	20.5181	20.8973	0.538397	1	0.479279	0.300894
919	SMARCA5;SMARCA1	SWI/SNF-related matrix-associated actin-dependent regulator of chromatin subfamily A member 5;Probable global transcription activator SNF2L1	O60264;P28370	LLNILMQLR	9	1112.67	2.7998e-07	174.21	86730000	13	22.9909	24.3983	23.8991	22.9897	24.0014	23.8873	0.0934868	1	-0.136608	-0.0793495
920	SMC3	Structural maintenance of chromosomes protein 3	Q9UQE7	SNFFYAIQFVLSDEFSHLRPEQR	23	2829.39	0.00073474	70.352	12672000	3	20.539	22.0996	18.2195	20.9827	20.8463	21.1897	0.252524	1	0.720203	0.308888
921	SMC4	Structural maintenance of chromosomes protein 4	Q9NTJ3	NAQFIIISLR	10	1173.69	0.038624	55.064	3019300	0	18.279	19.9169	19.2189	17.3454	18.3414	19.2005	0.516406	1	-0.842497	-0.439741
922	SMG1	Serine/threonine-protein kinase SMG1	Q96Q15	APSNTFHPQDFSDVISFILYGNSHR	25	2848.36	0.012093	60.991	19622000	4	20.8236	22.3209	20.1936	22.3024	21.5235	21.5827	0.435626	1	0.690142	0.367342
923	SMYD5	SET and MYND domain-containing protein 5	Q6GMV2	PLVAAQFLWNALYR	14	1660.91	5.505e-19	223.55	12328000	2	21.0393	21.746	19.2383	17.5908	19.3764	22.353	0.223109	1	-0.901144	-0.324515
924	SND1	Staphylococcal nuclease domain-containing protein 1	Q7KZF4	IHVFYIDYGNR	11	1395.69	6.7569e-06	123.86	28599000	8	21.4841	23.593	21.427	21.3702	21.3167	22.2157	0.27885	1	-0.533836	-0.271004
925	SNRNP200	U5 small nuclear ribonucleoprotein 200 kDa helicase	O75643	LELSVHLQPITR	12	1404.81	2.7148e-05	115.14	30842000	8	20.6327	22.9597	22.5741	22.0609	21.8348	22.6754	0.0613588	1	0.134843	0.0687061
926	SNRNP200	U5 small nuclear ribonucleoprotein 200 kDa helicase	O75643	LIGLSATLPNYEDVATFLR	19	2092.12	8.3027e-19	191.06	25164000	2	21.637	23.3149	20.7234	21.3106	21.6712	21.8562	0.132449	1	-0.279112	-0.14128
927	SNRNP200	U5 small nuclear ribonucleoprotein 200 kDa helicase	O75643	NQVLVFVHSR	10	1197.66	0.032575	56.359	3753200	1	18.029	20.5062	18.9441	18.7741	18.6992	19.2376	0.126379	1	-0.25613	-0.131853
928	SNRNP200	U5 small nuclear ribonucleoprotein 200 kDa helicase	O75643	TNLLLQAHLSR	11	1264.73	0.046943	50.207	6375900	1	18.8327	20.403	20.0351	19.6701	19.6508	20.7721	0.172345	1	0.274066	0.152106
929	SNRNP70	U1 small nuclear ribonucleoprotein 70 kDa	P08621	TQFLPPNLLALFAPR	15	1696.97	3.7987e-08	138.25	24418000	3	21.9203	22.9846	18.265	22.254	20.4853	22.4373	0.161169	1	0.668864	0.242442
930	SNRPA1	U2 small nuclear ribonucleoprotein A	P09661	SLTYLSILR	9	1064.62	0.00083009	106.36	3211800	1	18.561	20.5604	19.3877	18.9036	16.6455	18.3051	0.805969	1	-1.55161	-0.742291
931	SNRPE	Small nuclear ribonucleoprotein E	P62304	VMVQPINLIFR	11	1328.76	8.3736e-06	121.62	10810000	2	20.0764	21.4376	20.9143	20.2722	19.9085	21.3306	0.202438	1	-0.30563	-0.17148
932	SNRPN;SNRPB	Small nuclear ribonucleoprotein-associated protein N;Small nuclear ribonucleoprotein-associated proteins B and B	P63162;P14678	RVLGLVLLR	9	1037.71	0.0053107	92.187	9172700	1	17.5286	22.0485	18.9102	20.7708	20.4616	20.0813	0.28046	1	0.942198	0.369198
933	SNRPN;SNRPB	Small nuclear ribonucleoprotein-associated protein N;Small nuclear ribonucleoprotein-associated proteins B and B	P63162;P14678	VLGLVLLR	8	881.606	0.0010875	114.54	14081000	3	20.3592	21.8545	21.4859	20.2128	20.2709	21.7496	0.293378	1	-0.488773	-0.260725
934	SPR	Sepiapterin reductase	P35270	TLAPLLASLLSPGSVLVLSAR	21	2077.25	1.8615e-09	138.03	83256000	4	21.5086	25.5482	22.9444	23.8748	22.264	21.3729	0.234466	1	-0.829819	-0.320318
935	SPTBN1	Spectrin beta chain, non-erythrocytic 1	Q01082	LWEYLLELLR	10	1346.76	0.0002049	122.13	41163000	6	22.5294	23.6454	21.2624	22.3328	22.3531	23.0745	0.0506622	1	0.1077	0.0557943
936	SRCAP	Helicase SRCAP	A0A0C4DFX4;Q6ZRS2	MLDVLEQFLTYHGHLYLR	18	2247.15	2.7027e-08	125.89	11087000	3	19.9389	21.0719	19.8302	20.9379	21.0209	21.4218	0.93291	1	0.846537	0.5212
937	SRSF3	Serine/arginine-rich splicing factor 3	P84103	AFGYYGPLR	9	1042.52	0.000236	138.62	16749000	6	20.9317	21.5892	21.3873	21.4553	21.1263	21.8139	0.228987	1	0.162456	0.109923
938	SSBP1	Single-stranded DNA-binding protein, mitochondrial	Q04837	NPVTIFSLATNEMWR	15	1777.88	2.2195e-11	163.51	12219000	2	20.2315	22.9773	19.4899	19.515	18.9968	19.4608	0.665366	1	-1.57537	-0.692974
939	SSRP1	FACT complex subunit SSRP1	Q08945	RPMSAYMLWLNASR	14	1694.84	0.0020923	90.707	21189000	4	21.8253	23.4298	19.5279	20.9102	20.7233	20.7095	0.28995	1	-0.813361	-0.348464
940	STK33	Serine/threonine-protein kinase 33	Q9BYT3	WIIQSLASAIAYLHNNDIVHR	21	2433.29	1.3146e-13	160.27	89778000	11	23.4571	24.621	22.4581	23.5049	24.3406	23.6919	0.189359	1	0.333738	0.178058
941	STRN	Striatin	O43815	AQYSLPGILHFLQHEWAR	18	2165.12	0.0016292	70.335	7234400	1	20.3515	21.4625	18.1183	20.2042	17.0058	20.5302	0.186867	1	-0.73071	-0.271261
942	STX16-NPEPL1;STX16	Syntaxin-16	H3BU86;O14662	LLGNVVASLAQALQELSTSFR	21	2216.22	1.6167e-26	217.26	26575000	6	22.6226	22.0053	21.2292	21.4701	22.3363	22.3237	0.0639858	1	0.0909856	0.0536902
943	STXBP4	Syntaxin-binding protein 4	Q6ZWJ1	YFINHVTQTTSWIHPVMSVLNLSR	24	2842.46	3.382e-06	108.4	64139000	14	22.895	23.611	22.7396	22.8569	23.7177	23.8511	0.405707	1	0.393381	0.244154
944	SUN2	SUN domain-containing protein 2	Q9UH99	TALLSLFGIPLWYHSQSPR	19	2185.17	0.00023234	88.264	55279000	6	23.2716	24.0807	21.962	22.4784	23.1601	22.9513	0.137375	1	-0.241503	-0.130587
945	SUPT16H	FACT complex subunit SPT16	Q9Y5B9	NLGFGMGIEFR	11	1239.61	0.0021984	87.258	10320000	2	19.8039	21.352	20.6548	20.0044	20.0033	21.504	0.0510288	1	-0.0996532	-0.0532587
946	SUPT6H	Transcription elongation factor SPT6	Q7KZ85	DVYNHFLLYYGR	12	1558.76	1.9327e-05	117.23	5798200	1	19.864	21.8188	19.0499	19.1991	18.2743	18.0818	0.903674	1	-1.72582	-0.825334
947	SUPV3L1	ATP-dependent RNA helicase SUPV3L1, mitochondrial	Q8IYB8	LFHQAFISFR	10	1264.67	0.063907	31.185	3587900	0	19.5566	20.712	18.8065	19.2893	18.6788	17.2621	0.717073	1	-1.28164	-0.63539
948	SYMPK	Symplekin	Q92797	FMVHPAISSINLTTALGSLANIAR	24	2496.35	4.7147e-06	103.31	18666000	3	18.3449	22.9343	20.7141	21.7846	16.8631	22.2492	0.0581603	1	-0.365407	-0.108309
949	SYNCRIP	Heterogeneous nuclear ribonucleoprotein Q	O60506	LDEIYVAGLVAHSDLDER	18	2014	0.00029142	90.714	4725600	1	18.2538	21.2124	18.0214	19.1818	17.7575	19.7809	0.0755886	1	-0.255803	-0.10705
950	TAMM41	Phosphatidate cytidylyltransferase, mitochondrial	Q96BW9	ILSHFPEELSLAFVYGSGVYR	21	2383.22	3.5679e-06	108.71	8718500	1	19.8288	21.6399	18.79	19.6511	19.7179	21.1828	0.0340067	1	0.0977332	0.0450138
951	TAOK2	Serine/threonine-protein kinase TAO2	Q9UL54	ASQGLASHLPPWAIHTLASWGLLR	24	2581.39	0.00036716	80.83	17262000	4	21.633	21.6279	20.8769	20.6332	21.889	21.6687	0.0126678	1	0.0176945	0.0106497
952	TARS	Threonine--tRNA ligase, cytoplasmic	P26639	GAYIYNALIEFIR	13	1541.82	3.1609e-05	113.15	32293000	4	21.842	24.1359	19.2509	21.2691	20.1761	22.4584	0.10196	1	-0.441758	-0.16021
953	TARS;TARSL2	Threonine--tRNA ligase, cytoplasmic;Probable threonine--tRNA ligase 2, cytoplasmic	P26639;A2RTX5	WPFWLSPR	8	1087.56	0.00020621	143.23	67409000	22	23.2687	24.2067	22.625	22.6208	23.1147	23.9261	0.0870522	1	-0.14624	-0.0814068
954	TARS;TARSL2	Threonine--tRNA ligase, cytoplasmic;Probable threonine--tRNA ligase 2, cytoplasmic	P26639;A2RTX5	YHQCATIQLDFQLPIR	16	2002.01	0.061085	36.638	3642400	0	19.017	19.6183	18.7989	18.7633	19.7683	18.9688	0.0186802	1	0.0220451	0.0138434
955	TARS2	Threonine--tRNA ligase, mitochondrial	Q9BW92	SVYAVLGFSFR	11	1244.66	7.9522e-06	132.01	9073800	2	20.2265	21.5585	19.1646	18.9306	20.2249	21.2218	0.0695409	1	-0.190735	-0.0883472
956	TBC1D4	TBC1 domain family member 4	O60343	RGEIWQFLALQYR	13	1678.89	5.1866e-05	98.337	9014100	1	19.9977	22.1649	18.0397	20.0777	19.1592	20.3141	0.0606035	1	-0.217114	-0.0888965
957	TBL2	Transducin beta-like protein 2	Q9Y4P3	LALSPNAQVLALASGSSIHLYNTR	24	2495.35	1.0225e-06	117.64	7837000	1	19.1331	22.0329	19.0225	19.535	18.2102	20.3916	0.228487	1	-0.6839	-0.288305
958	TBL3	Transducin beta-like protein 3	Q12788	ALGLAISLDRPHTVLTVIQAIR	22	2356.4	1.3411e-20	199.99	28618000	3	21.3132	23.3272	21.7723	20.136	22.8911	21.5051	0.24757	1	-0.626837	-0.284671
959	TBRG4	Protein TBRG4	Q969Z0	WLSLPLFEAFAQHVLNR	17	2040.09	7.9957e-18	189.1	131370000	16	24.5205	25.4321	22.5989	23.9038	23.8527	24.5662	0.0296185	1	-0.0762482	-0.0369055
960	TCAF1	TRPM8 channel-associated factor 1	Q9Y4C2	FPGNLLLNPFGISITSQSLNPGPFR	25	2685.43	1.3292e-09	134.87	4798900	2	19.8885	21.5567	18.5403	17.1545	18.4672	18.361	0.967601	1	-2.00097	-0.922688
961	TCEAL4;TCEAL2	Transcription elongation factor A protein-like 4;Transcription elongation factor A protein-like 2	Q96EI5;Q9H3H9	LGAFLWMQR	9	1120.59	0.00047055	114.72	7534900	1	19.7916	21.0974	20.1425	19.6235	19.7416	20.5563	0.309326	1	-0.370068	-0.219225
962	TCF25	Transcription factor 25	Q9BQ70	LSPISHGNTIALFFR	15	1671.91	0.0024327	80.632	3895600	1	19.4271	20.9172	19.5948	18.6753	18.251	17.3181	1.42757	1	-1.89822	-1.04373
963	TCP1	T-complex protein 1 subunit alpha	P17987	FATEAAITILR	11	1204.68	6.9029e-06	134.25	25718000	8	20.5502	22.9838	22.0393	22.0273	21.2826	22.1801	0.0120433	1	-0.0277468	-0.0141517
964	TCP1	T-complex protein 1 subunit alpha	P17987	SVVPGGGAVEAALSIYLENYATSMGSR	27	2698.33	9.5122e-07	111.79	22959000	5	21.0026	23.3325	19.0014	21.4298	19.7624	22.5297	0.0290285	1	0.128452	0.0477922
965	TEX264	Testis-expressed sequence 264 protein	Q9Y6I9	VFSFPAPSHVVTATFPYTTILSIWLATRR	29	3277.77	2.295e-07	116.72	11398000	2	19.6665	22.3961	17.6348	20.1426	21.3278	20.0061	0.15371	1	0.593035	0.224482
966	TFIP11	Tuftelin-interacting protein 11	Q9UBB9	EVENWNPLTDTVPIHSWIHPWLPLMQAR	28	3378.7	2.2853e-07	117.21	21579000	4	20.8959	22.1606	20.5297	22.7332	21.6081	21.635	0.57416	1	0.796679	0.438315
967	TFRC	Transferrin receptor protein 1;Transferrin receptor protein 1, serum form	P02786	EMGLSLQWLYSAR	13	1552.77	5.5306e-08	138.25	20492000	3	21.2367	22.7286	20.5418	20.5991	20.6391	22.592	0.0869408	1	-0.225636	-0.106367
968	THG1L	Probable tRNA(His) guanylyltransferase	Q9NWX6	FMTHVASQFASSYVFYWR	18	2226.04	2.3508e-08	128.9	11710000	2	20.9878	21.4429	19.8908	19.9831	20.9411	21.395	0.000395488	0.999201	-0.000753403	-0.00041378
969	THOC1	THO complex subunit 1	Q96FV9	FWSLQDYFR	9	1260.59	0.00066134	119.27	9576700	2	20.6269	21.3282	19.3967	20.0188	20.0007	21.2667	0.0102721	1	-0.0219148	-0.0115158
970	THOC2	THO complex subunit 2	Q8NI27	LIHITIEPLYR	11	1366.8	7.84e-05	109.66	15672000	4	20.669	21.8828	22.0389	20.6576	20.839	21.1326	0.650328	1	-0.653815	-0.395165
971	TJP1	Tight junction protein ZO-1	Q07157	APGFGFGIAISGGR	14	1305.68	0.0028213	83.045	4478200	0	19.2005	20.0675	19.2886	18.2157	19.0907	20.2808	0.18742	1	-0.323123	-0.173831
972	TKT	Transketolase	P29401	ISSIQATTAAGSGHPTSCCSAAEIMAVLFFHTMR	34	3609.68	7.2148e-05	73.817	37089000	4	21.814	24.2928	20.1504	22.3022	21.0003	22.0747	0.0817131	1	-0.293345	-0.118827
973	TKT	Transketolase	P29401	TVPFCSTFAAFFTR	14	1650.79	5.1222e-05	107.18	44618000	6	22.4028	24.7275	17.3626	22.057	21.8923	21.5345	0.0521476	1	0.330321	0.0977524
974	TLCD1	Calfacilitin	Q96CP7	LLHPALPLLLGATLTFR	17	1845.12	2.2328e-06	119.62	10772000	3	21.0449	22.1324	20.1471	19.5222	17.4629	20.9999	0.689262	1	-1.77975	-0.749271
975	TLK1;TLK2	Serine/threonine-protein kinase tousled-like 1;Serine/threonine-protein kinase tousled-like 2	Q9UKI8;Q86UE8	YLLLHLLGR	9	1096.68	0.042522	51.193	6945900	2	20.1623	17.5396	20.71	20.0413	20.192	20.7638	0.357894	1	0.861688	0.391176
976	TLN1;TLN2	Talin-1;Talin-2	Q9Y490;Q9Y4G6	FFYSDQNVDSRDPVQLNLLYVQAR	24	2886.43	2.7089e-14	167.24	4837500	1	18.1667	21.5047	18.9113	19.176	18.7771	19.0054	0.205441	1	-0.541379	-0.244059
977	TMED8	Protein TMED8	Q6PL24	TLYFHIYYTS	10	1306.62	0.0042906	87.323	11445000	2	20.6443	21.4711	20.2066	19.9117	20.6519	21.543	0.0407107	1	-0.0717818	-0.0398817
978	TMED9	Transmembrane emp24 domain-containing protein 9	Q9BVK6	FSLFAGGMLR	10	1097.57	0.02396	67.169	5503300	0	19.1872	20.1789	19.8499	19.3293	19.3151	20.4809	0.0208155	1	-0.0302238	-0.0179479
979	TMEM102	Transmembrane protein 102	Q8N9M5	DFVFSLLGLVHR	12	1401.78	0.043749	47.288	2971900	0	17.8951	20.3147	17.5405	17.7342	18.1383	19.4711	0.0455453	1	-0.13556	-0.0611339
980	TMEM59	Transmembrane protein 59	Q9BXS4	SKTEDHEEAGPLPTKVNLAHSEI	23	2729.33	0.028028	54.672	18755000	6	21.1108	22.0255	21.9726	21.263	21.2988	21.5211	0.483965	1	-0.341976	-0.226882
981	TMPO	Lamina-associated polypeptide 2, isoform alpha;Thymopoietin;Thymopentin	P42166	DVYVQLYLQHLTAR	14	1717.92	2.7727e-11	171.05	153420000	13	24.1733	25.585	23.8612	23.7429	24.1661	25.1042	0.109838	1	-0.202098	-0.10833
982	TMTC3	Transmembrane and TPR repeat-containing protein 3	Q6ZXV5	IAPNHLNVYINLANLIR	17	1947.11	1.5848e-23	214.47	31190000	6	21.6785	23.5237	21.186	21.5176	22.5615	22.0004	0.0455282	1	-0.102928	-0.0521738
983	TNPO1	Transportin-1	Q92973	LLPHMHNIVEYMLQR	15	1892.98	0.0013293	87.498	11356000	2	20.5663	22.3831	18.0622	20.4106	20.3637	20.3283	0.00794224	1	0.0302741	0.0123426
984	TNPO1;TNPO2	Transportin-1;Transportin-2	Q92973;O14787	ALVMLLEVR	9	1042.62	0.0084718	83.265	2983700	1	18.7963	20.6849	19.5855	17.643	18.3535	15.7728	1.21013	1	-2.43251	-1.13425
985	TNPO2	Transportin-2	O14787	LIPHMHSIIQYMLQR	15	1879	3.6986e-05	102.52	16236000	3	21.5499	22.1864	20.1098	20.6126	22.003	20.4731	0.117058	1	-0.252512	-0.127227
986	TNPO3	Transportin-3	Q9Y5L0	SQVVIPILQWAIASTTLDHR	20	2247.24	0.00047078	80.752	10639000	2	20.2344	21.9231	19.0257	19.7828	19.9778	21.4975	0.00820408	1	0.0249507	0.011342
987	TOM1L2	TOM1-like protein 2	Q6ZVM7	VLALIQAWADAFR	13	1472.81	1.3033e-07	132.91	6678000	1	19.7489	21.0383	18.5794	19.3775	19.9163	20.5925	0.0769392	1	0.173222	0.0869441
988	TOMM40	Mitochondrial import receptor subunit TOM40 homolog	O96008	LPPLPLTLALGAFLNHR	17	1842.09	1.648e-17	176.23	16358000	4	20.885	21.9168	19.6478	19.0499	20.8533	22.7803	0.0206026	1	0.0779648	0.0316793
989	TOP2A	DNA topoisomerase 2-alpha	P11388	GLLINFIHHNWPSLLR	16	1929.07	8.8445e-08	124.7	45936000	16	21.0417	23.13	21.7338	22.2595	22.9188	24.1143	0.618998	1	1.12904	0.559017
990	TOR2A	Torsin-2A	Q5JU69	SYVSSLLAHYLFQGGLR	17	1910	1.4733e-06	120.3	25478000	5	21.8667	23.0629	20.4685	21.4145	21.7048	22.3176	0.00532269	1	0.0129217	0.00647524
991	TP53	Cellular tumor antigen p53	P04637	RPILTIITLEDSSGNLLGR	19	2067.17	4.1122e-09	130.01	6058000	1	17.9992	21.7529	19.278	18.5369	18.2846	19.8217	0.264698	1	-0.795636	-0.331489
992	TPI1	Triosephosphate isomerase	P60174	DCGATWVVLGHSER	14	1585.73	0.044257	53.377	6458200	1	18.1935	21.2624	19.435	20.3577	18.2958	20.275	0.00366472	1	0.0125192	0.00540231
993	TPP1	Tripeptidyl-peptidase 1	O14773	VPIPWVSGTSASTPVFGGILSLINEHR	27	2833.51	2.0159e-06	100.88	5450900	1	18.8471	21.0924	17.9458	20.0828	18.5839	20.242	0.115363	1	0.341144	0.149997
994	TRA2A	Transformer-2 protein homolog alpha	Q13595	GFAFVYFER	9	1134.55	0.00066113	119.29	17606000	3	20.9295	23.0726	20.332	19.9389	20.3001	21.5967	0.356515	1	-0.832813	-0.383357
995	TRAPPC2B;TRAPPC2	Trafficking protein particle complex subunit 2B;Trafficking protein particle complex subunit 2	P0DI82;P0DI81	FNEWFVSAFVTAGHMR	16	1897.89	0.026826	59.513	7643000	1	19.729	21.8382	18.801	19.2561	19.1593	20.3711	0.208448	1	-0.527245	-0.241955
996	TRIM28	Transcription intermediary factor 1-beta	Q13263	LIYFQLHR	8	1088.61	9.4092e-05	146.21	117170000	15	23.8946	21.4378	24.6634	24.2682	24.1578	24.9866	0.493254	1	1.13898	0.516114
997	TRIM4	E3 ubiquitin-protein ligase TRIM4	Q9C037	LRPFFWLSPLASLVIPPVTDR	21	2423.37	4.4053e-10	146.89	19601000	4	21.6463	22.2057	19.7127	21.031	21.6444	22.3107	0.219562	1	0.473812	0.23217
998	TRIP12	E3 ubiquitin-protein ligase TRIP12	Q14669	FLHVFFSSPLPGEEPIGR	18	2028.05	0.062618	36.112	8961800	0	20.0362	21.1776	19.7711	20.1874	20.6277	20.7843	0.16523	1	0.204871	0.122897
999	TRIP12	E3 ubiquitin-protein ligase TRIP12	Q14669	LVIFWALNEGVSR	13	1502.82	0.076313	43.308	1554800	0	17.5504	19.3507	17.1474	17.1165	17.4589	18.6349	0.124897	1	-0.279385	-0.138401
1000	TRMT61A	tRNA (adenine(58)-N(1))-methyltransferase catalytic subunit TRMT61A	Q96FX7	GGWVYVLHPTPELWTLNLPHR	21	2484.31	0.0037439	66.827	13522000	3	20.5906	22.6809	18.9376	20.8864	17.3162	21.406	0.19841	1	-0.866804	-0.300879
1001	TRMU	Mitochondrial tRNA-specific 2-thiouridylase 1	O75648	GWFLYTLGQR	10	1239.64	0.00040216	106.36	5723500	1	19.9121	20.87	19.2353	19.3028	18.4028	20.5699	0.299485	1	-0.580642	-0.292163
1002	TSC1	Hamartin	Q92574	LSILSLLGHVIR	12	1319.83	8.5401e-05	99.522	10169000	3	17.3536	21.8874	20.7809	19.7281	20.8314	20.7419	0.109381	1	0.426476	0.163408
1003	TSN	Translin	Q15631	PLHISTFINELDSGFR	16	1844.94	9.049e-08	124.16	18002000	2	20.7546	22.9794	20.6942	19.9495	19.992	22.006	0.337185	1	-0.826892	-0.373693
1004	TSTA3	GDP-L-fucose synthase	Q13630	VQPTHVIHLAAMVGGLFR	18	1945.07	0.00031211	90.348	52611000	11	22.7408	24.2282	22.5463	21.7755	22.7503	23.1299	0.392213	1	-0.619889	-0.332023
1005	TTI2	TELO2-interacting protein 2	Q6NXR4	HVFSWTLQQVTRPWLSQHLER	21	2647.38	4.3064e-19	181.88	57362000	6	22.7981	23.7141	22.2474	22.7285	23.3621	23.6968	0.266734	1	0.342609	0.199958
1006	TUBA1A;TUBA3E	Tubulin alpha-1A chain;Tubulin alpha-3E chain	Q71U36;P0DPH8;P0DPH7;Q6PEY2	LIGQIVSSITASLR	14	1456.86	3.0185e-14	196.88	604820000	20	26.2802	26.7419	26.7201	25.374	26.9344	26.9407	0.109609	1	-0.164399	-0.0943493
1007	TUBA1C;TUBA1B;TUBA1A	Tubulin alpha-1C chain;Tubulin alpha-1B chain;Tubulin alpha-1A chain	Q9BQE3;P68363;Q71U36	AVFVDLEPTVIDEVR	15	1700.9	3.8616e-11	161.99	48165000	6	21.3534	23.5246	22.2263	23.0239	21.6449	23.9938	0.217696	1	0.519399	0.244011
1008	TUBA1C;TUBA1B;TUBA1A	Tubulin alpha-1C chain;Tubulin alpha-1B chain;Tubulin alpha-1A chain	Q9BQE3;P68363;Q71U36	EIIDLVLDR	9	1084.61	0.00049236	127.56	11326000	4	16.1306	21.06	20.6192	21.3749	18.0852	22.1758	0.251416	1	1.27541	0.397125
1009	TUBA1C;TUBA1B;TUBA4A;TUBA8;TUBA1A	Tubulin alpha-1C chain;Tubulin alpha-1B chain;Tubulin alpha-4A chain;Tubulin alpha-8 chain;Tubulin alpha-1A chain	Q9BQE3;P68363;P68366;Q9NY65;Q71U36;P0DPH8;P0DPH7	AFVHWYVGEGMEEGEFSEAR	20	2329.01	4.778e-09	124.26	88319000	11	23.19	24.808	22.9984	23.1391	22.3969	24.6451	0.112498	1	-0.27176	-0.130927
1010	TUBA1C;TUBA1B;TUBA4A;TUBA8;TUBA1A;TUBA3E	Tubulin alpha-1C chain;Tubulin alpha-1B chain;Tubulin alpha-4A chain;Tubulin alpha-8 chain;Tubulin alpha-1A chain;Tubulin alpha-3E chain	Q9BQE3;P68363;P68366;Q9NY65;Q71U36;P0DPH8;P0DPH7;Q6PEY2	FDGALNVDLTEFQTNLVPYPR	21	2408.2	1.025e-19	198.59	70134000	9	23.1492	24.8839	21.3734	22.9296	22.3846	23.7066	0.0403442	1	-0.128543	-0.0562903
1011	TUBA1C;TUBA1B;TUBA4A;TUBA8;TUBA1A;TUBA3E	Tubulin alpha-1C chain;Tubulin alpha-1B chain;Tubulin alpha-4A chain;Tubulin alpha-8 chain;Tubulin alpha-1A chain;Tubulin alpha-3E chain	Q9BQE3;P68363;P68366;Q9NY65;Q71U36;P0DPH8;P0DPH7;Q6PEY2	NLDIERPTYTNLNR	14	1717.87	7.0159e-14	192.14	30015000	6	19.8848	22.5666	21.6017	22.9975	17.7274	23.427	0.00541663	1	0.0329431	0.0103165
1012	TUBA1C;TUBA1B;TUBA4A;TUBA8;TUBA4B	Tubulin alpha-1C chain;Tubulin alpha-1B chain;Tubulin alpha-4A chain;Tubulin alpha-8 chain;Putative tubulin-like protein alpha-4B	Q9BQE3;P68363;P68366;Q9NY65;Q9H853	LISQIVSSITASLR	14	1486.87	1.5412e-24	228.83	9743000000	45	30.2827	30.6304	30.4451	29.7108	30.3907	31.495	0.0515562	1	0.0793953	0.0459068
1013	TUBB	Tubulin beta chain	P07437	FWEVISDEHGIDPTGTYHGDSDLQLDR	27	3101.4	1.174e-09	125.97	26019000	5	20.7828	23.4171	20.0784	22.5261	17.7647	22.4843	0.0953482	1	-0.50105	-0.162748
1014	TUBB;TUBB3;TUBB2B;TUBB2A	Tubulin beta chain;Tubulin beta-3 chain;Tubulin beta-2B chain;Tubulin beta-2A chain	P07437;A0A0B4J269;Q13509;Q9BVA1;Q13885	AILVDLEPGTMDSVR	15	1614.83	4.0833e-05	103.08	10809000	2	19.0604	20.9064	20.4577	21.3826	19.4085	21.7085	0.310831	1	0.691673	0.32805
1015	TUBB;TUBB3;TUBB4B;TUBB2B;TUBB2A	Tubulin beta chain;Tubulin beta-3 chain;Tubulin beta-4B chain;Tubulin beta-2B chain;Tubulin beta-2A chain	P07437;A0A0B4J269;Q13509;P68371;Q9BVA1;Q13885	GHYTEGAELVDSVLDVVR	18	1957.97	2.3299e-05	103.13	46282000	0	21.0659	23.7565	21.7046	22.7915	20.532	24.079	0.078082	1	0.291818	0.115957
1016	TUBB;TUBB3;TUBB4B;TUBB4A;TUBB2B;TUBB2A	Tubulin beta chain;Tubulin beta-3 chain;Tubulin beta-4B chain;Tubulin beta-4A chain;Tubulin beta-2B chain;Tubulin beta-2A chain	P07437;A0A0B4J269;Q13509;P68371;P04350;Q9BVA1;Q13885	ISEQFTAMFR	10	1228.59	9.9794e-06	146.81	8481200	4	19.0795	20.9039	20.1164	20.7886	17.0722	21.4573	0.0618399	1	-0.260548	-0.0978502
1017	TUBB;TUBB3;TUBB8;TUBB6;TUBB1;TUBB4B;TUBB4A;TUBB2B;TUBB2A	Tubulin beta chain;Tubulin beta-3 chain;Tubulin beta-8 chain;Tubulin beta-8 chain-like protein LOC260334;Tubulin beta-6 chain;Tubulin beta-1 chain;Tubulin beta-4B chain;Tubulin beta-4A chain;Tubulin beta-2B chain;Tubulin beta-2A chain	P07437;A0A0B4J269;Q13509;Q3ZCM7;A6NNZ2;Q9BUF5;CON__ENSEMBL:ENSBTAP00000025008;Q9H4B7;P68371;P04350;Q9BVA1;Q13885	LAVNMVPFPR	10	1142.63	2.1686e-14	221.25	29813000	7	20.7317	22.758	21.5105	23.051	21.3577	22.657	0.368765	1	0.688502	0.347555
1018	TUBB;TUBB4B;TUBB4A	Tubulin beta chain;Tubulin beta-4B chain;Tubulin beta-4A chain	P07437;P68371;P04350	YLTVAAVFR	9	1038.59	5.3442e-09	186.67	598910000	17	25.6019	27.2146	26.6524	26.0806	26.1521	27.0735	0.0320634	1	-0.054245	-0.030637
1019	TUBB;TUBB8;TUBB6;TUBB4B;TUBB4A;TUBB2B;TUBB2A	Tubulin beta chain;Tubulin beta-8 chain;Tubulin beta-8 chain-like protein LOC260334;Tubulin beta-6 chain;Tubulin beta-4B chain;Tubulin beta-4A chain;Tubulin beta-2B chain;Tubulin beta-2A chain	P07437;Q3ZCM7;A6NNZ2;Q9BUF5;P68371;P04350;Q9BVA1;Q13885	LHFFMPGFAPLTSR	14	1619.83	6.6456e-08	134.01	725390000	37	27.1097	27.5447	26.0889	26.2142	26.4187	27.1199	0.25685	1	-0.330194	-0.192957
1020	TUBB2B;TUBB2A	Tubulin beta-2B chain;Tubulin beta-2A chain	Q9BVA1;Q13885	YLTVAAIFR	9	1052.6	4.7187e-07	173.88	66489000	11	22.5545	24.5424	23.2623	22.3996	23.0274	23.4863	0.295323	1	-0.481991	-0.258921
1021	TUBB4B;TUBB4A	Tubulin beta-4B chain;Tubulin beta-4A chain	P68371;P04350	FWEVISDEHGIDPTGTYHGDSDLQLER	27	3115.42	1.3825e-09	122.04	11042000	3	19.7343	21.887	18.6415	21.045	18.8104	21.6363	0.115939	1	0.40967	0.164903
1022	TUBG2;TUBG1	Tubulin gamma-2 chain;Tubulin gamma-1 chain	Q9NRH3;P23258	LANFIPWGPASIQVALSR	18	1939.07	0.077191	22.108	6832700	0	20.122	20.9577	18.9517	19.4156	19.9611	20.4457	0.0360984	1	-0.0696545	-0.0375812
1023	TUBG2;TUBG1	Tubulin gamma-2 chain;Tubulin gamma-1 chain	Q9NRH3;P23258	LHIQNPSFSQINQLVSTIMSASTTTLR	27	2986.55	1.4335e-21	196.2	147060000	18	23.7177	24.6324	23.6505	24.4561	24.3138	25.5818	0.699147	1	0.783655	0.458008
1024	TUBG2;TUBG1	Tubulin gamma-2 chain;Tubulin gamma-1 chain	Q9NRH3;P23258	YPGYMNNDLIGLIASLIPTPR	21	2317.21	1.0909e-10	147.53	41192000	4	24.1877	17.7476	21.9294	22.2507	22.1067	23.0329	0.243103	1	1.17515	0.378063
1025	TUBGCP3	Gamma-tubulin complex component 3	Q96CW5	SLVQHILSLVSHPVLSFLYR	20	2307.31	1.3622e-13	163.85	24889000	2	21.1221	22.9294	19.2255	20.7972	23.1352	21.5023	0.220028	1	0.71923	0.290723
1026	TUFM	Elongation factor Tu, mitochondrial	P49411	GITINAAHVEYSTAAR	16	1672.85	3.8593e-05	97.836	8321300	2	18.946	21.642	19.8189	20.3451	19.4441	20.5858	0.00401031	1	-0.0106246	-0.00514034
1027	TUT1	Speckle targeted PIP5K1A-regulated poly(A) polymerase	Q9H6E5	MLTVTPLQDPQGLFPDLHHFLQVFLPQAIR	30	3470.85	1.5509e-29	208.37	18031000	2	21.1494	21.3313	20.1695	20.7372	21.3325	22.8382	0.448548	1	0.75257	0.391591
1028	TWF1	Twinfilin-1	Q12792	LDSQNAQGYEWIFIAWSPDHSHVR	24	2855.34	0.055204	33.548	6167500	1	19.3707	21.7689	19.1229	19.2664	17.9027	19.9888	0.423784	1	-1.03487	-0.461562
1029	TXNDC5	Thioredoxin domain-containing protein 5	Q8NBS9	GYPTLLLFR	9	1078.62	0.045698	53.166	3213600	0	19.0456	20.2754	18.375	18.5389	17.7517	19.6128	0.315425	1	-0.597536	-0.302554
1030	UAP1	UDP-N-acetylhexosamine pyrophosphorylase;UDP-N-acetylgalactosamine pyrophosphorylase;UDP-N-acetylglucosamine pyrophosphorylase	Q16222	LLFNAGNIANHFFTVPFLR	19	2190.17	9.524e-19	180.92	410690000	12	26.2187	26.6724	23.9056	25.6364	26.6103	25.7214	0.160874	1	0.390484	0.184927
1031	UBA1	Ubiquitin-like modifier-activating enzyme 1	P22314	AVTLHDQGTAQWADLSSQFYLR	22	2506.22	5.7445e-06	102.48	11420000	2	19.9693	22.3087	19.774	20.1623	17.3406	21.5769	0.26609	1	-0.9908	-0.368626
1032	UBA1	Ubiquitin-like modifier-activating enzyme 1	P22314	DDDSNFHMDFIVAASNLR	18	2065.92	0.00024341	91.457	16062000	3	20.1571	22.7493	19.3612	20.7331	20.1442	22.0249	0.0631798	1	0.211556	0.0894934
1033	UBA1	Ubiquitin-like modifier-activating enzyme 1	P22314	LQTSSVLVSGLR	12	1258.72	1.125e-05	120.68	9012700	2	18.7602	21.434	20.5863	20.6063	19.0688	20.9423	0.0184859	1	-0.0543321	-0.0249548
1034	UBE2L3	Ubiquitin-conjugating enzyme E2 L3	A0A1B0GUS4;P68036	TDQVIQSLIALVNDPQPEHPLR	22	2482.32	2.6456e-09	132.45	7387600	1	18.5409	21.8673	19.2766	19.346	17.6486	20.8416	0.170386	1	-0.61621	-0.240061
1035	UBLCP1	Ubiquitin-like domain-containing CTD phosphatase 1	Q8WVY7	LLVLDVDYTLFDHR	14	1717.9	0.001911	84.468	12008000	1	20.3671	22.0758	20.2572	20.0562	20.7913	20.9863	0.166638	1	-0.28877	-0.155811
1036	UBP1	Upstream-binding protein 1	Q9NZI7	LALVFNIPLHQINQVYR	17	2037.15	2.1389e-05	102.28	24681000	6	21.5614	22.8621	21.0374	21.3703	21.8072	22.3724	0.0160129	1	0.0297031	0.0163644
1037	UBR2	E3 ubiquitin-protein ligase UBR2	Q8IWV8	EFNLYFYHFSR	11	1521.7	0.060114	44.299	9739600	2	20.3554	21.9371	19.1894	19.3101	20.2115	20.8734	0.147142	1	-0.362358	-0.171242
1038	UBR2	E3 ubiquitin-protein ligase UBR2	Q8IWV8	LLSWLGSIIGYSDGLR	16	1748.95	7.2175e-08	137.16	8252600	1	19.8519	21.2185	19.4578	19.6791	19.7925	21.1937	0.021086	1	0.0456861	0.0237652
1039	UCHL1	Ubiquitin carboxyl-terminal hydrolase isozyme L1	P09936	VNFHFILFNNVDGHLYELDGR	21	2518.24	4.3921e-36	252.4	848040000	21	26.6292	28.3957	25.4542	26.4856	26.8484	26.9574	0.0241608	1	-0.0625998	-0.03029
1040	UCHL3	Ubiquitin carboxyl-terminal hydrolase isozyme L3	P15374	VDLHFIALVHVDGHLYELDGR	21	2417.25	2.0406e-13	152.32	22486000	5	21.627	22.7257	20.6859	20.9942	22.6102	21.0244	0.0594958	1	-0.136567	-0.0684489
1041	UGGT1	UDP-glucose:glycoprotein glucosyltransferase 1	Q9NYU2	YNSWPSSLQELLRPTFPGVIR	21	2459.3	0.03937	50.425	7349000	0	19.4632	21.5727	17.3327	20.3064	19.4569	20.5077	0.192015	1	0.634123	0.257184
1042	UNC45A	Protein unc-45 homolog A	Q9H3U1	IPQVTTHWLEILQALLLSSNQELQHR	26	3066.66	6.4146e-49	255.42	137470000	11	20.2552	25.0927	20.0461	23.5204	25.8856	24.5943	0.736999	1	2.86874	0.961168
1043	USMG5	Up-regulated during skeletal muscle growth protein 5	Q96IX5	AGPESDAQYQFTGIKKYFNSYTLTGR	26	3169.51	4.2371e-05	93.111	5076600	1	20.8413	21.2624	19.3805	17.8783	18.6504	17.1342	1.65318	0.718909	-2.60708	-1.35867
1044	USO1	General vesicular transport factor p115	O60763	VTNLHLMLQLVR	12	1435.83	2.0944e-06	130.56	29254000	11	21.4887	23.0292	22.53	20.8168	21.6627	22.6383	0.390499	1	-0.643371	-0.339532
1045	USO1	General vesicular transport factor p115	O60763	YRLEVGIQAMEHLIHVLQTDR	21	2520.33	2.0973e-14	172.3	18517000	4	20.7626	22.9101	18.7039	21.2824	21.8606	21.2521	0.212147	1	0.672819	0.276841
1046	USP10	Ubiquitin carboxyl-terminal hydrolase 10	Q14694	LFAVVYHHGNSATGGHYTTDVFQIGLNGWLR	31	3429.7	3.6209e-10	123.79	29504000	5	22.0187	22.933	20.938	21.2055	22.5098	22.7073	0.0844872	1	0.177581	0.0913212
1047	USP11	Ubiquitin carboxyl-terminal hydrolase 11	P51784	DYNNSYYGLMLFGHPLLVSVPR	22	2554.27	3.7599e-06	109.05	10913000	1	20.4445	21.8396	18.6889	20.7881	20.5223	20.9269	0.173677	1	0.421475	0.198884
1048	USP11	Ubiquitin carboxyl-terminal hydrolase 11	P51784	VGHFASQFLGYQQHDSQELLSFLLDGLHEDLNR	33	3812.85	1.8765e-07	98.236	10749000	1	17.4671	17.1334	18.6225	19.3858	19.0133	23.1848	0.92553	1	2.78695	1.06901
1049	USP14	Ubiquitin carboxyl-terminal hydrolase 14	P54578	LPAYLTIQMVR	11	1303.73	0.00020991	102.61	13727000	3	19.8074	21.8732	21.1421	21.0141	20.5456	21.5191	0.0436709	1	0.0853551	0.0457204
1050	USP14	Ubiquitin carboxyl-terminal hydrolase 14	P54578	LSGGGDWHIAYVLLYGPR	18	1973.02	3.1639e-09	145.55	62256000	6	22.7539	25.0246	20.6335	21.8882	22.0402	23.421	0.0930407	1	-0.354191	-0.138445
1051	USP22	Ubiquitin carboxyl-terminal hydrolase 22	Q9UPT9	LLHLVWTHAR	10	1244.71	0.00029966	96.89	8097000	3	19.9063	20.8692	20.9348	19.9252	17.6595	21.0683	0.410148	1	-1.01911	-0.451856
1052	USP24	Ubiquitin carboxyl-terminal hydrolase 24	Q9UPU5	YWNAYMLFYQR	11	1553.71	0.0015674	89.698	5991500	1	19.1733	21.1664	17.7064	19.5912	19.863	20.0552	0.183833	1	0.48778	0.22055
1053	USP48	Ubiquitin carboxyl-terminal hydrolase 48	Q86UV5	GGSYVYELSAVLIHR	15	1662.87	5.0274e-05	95.651	4016300	1	19.0095	21.3376	18.7481	18.6033	16.7164	17.1654	1.03407	1	-2.20336	-1.00123
1054	USP5	Ubiquitin carboxyl-terminal hydrolase 5	P45974	DLGYIYFYQR	10	1336.65	0.00050312	98.392	5057200	1	19.2079	21.264	18.2559	18.6782	18.6472	19.5923	0.254949	1	-0.603364	-0.28192
1055	USP7	Ubiquitin carboxyl-terminal hydrolase 7	Q93009	FLTLPPVLHLQLMR	14	1676.98	4.0622e-05	101.6	113660000	14	23.4456	25.0908	23.9447	23.7282	24.0429	24.1929	0.124673	1	-0.172367	-0.101042
1056	USP9X	Probable ubiquitin carboxyl-terminal hydrolase FAF-X	Q93008	FWFAHNVLFNVSNR	14	1749.87	3.3496e-11	167.03	50728000	6	22.9488	23.7531	22.1664	21.604	22.7645	23.6837	0.132408	1	-0.272051	-0.139072
1057	USP9X	Probable ubiquitin carboxyl-terminal hydrolase FAF-X	Q93008	HLQVIFGHLAASR	13	1447.8	4.8514e-05	98.942	3447900	1	19.4927	20.6789	19.9763	18.383	17.7087	18.3377	2.02442	0.944222	-1.90617	-1.18589
1058	USP9X	Probable ubiquitin carboxyl-terminal hydrolase FAF-X	Q93008	YISFLWQVADLGSSLNMPPLR	21	2406.24	1.9461e-06	114.55	9505400	2	20.2999	21.5398	18.5193	19.9521	20.1807	21.303	0.136446	1	0.358889	0.165317
1059	USP9X;USP9Y	Probable ubiquitin carboxyl-terminal hydrolase FAF-X;Probable ubiquitin carboxyl-terminal hydrolase FAF-Y	Q93008;O00507	LLLTAIGYGHVR	12	1311.77	0.0052991	69.721	10677000	1	20.0723	21.5581	20.2514	20.2833	20.0304	21.4632	0.0180772	1	-0.0350081	-0.0189889
1060	USP9X;USP9Y	Probable ubiquitin carboxyl-terminal hydrolase FAF-X;Probable ubiquitin carboxyl-terminal hydrolase FAF-Y	Q93008;O00507	LVGVLVHSGQASGGHYYSYIIQR	23	2503.3	1.1901e-37	229.1	75736000	10	22.9102	24.9231	22.6559	22.814	22.4552	23.9591	0.189546	1	-0.420298	-0.205175
1061	USP9X;USP9Y	Probable ubiquitin carboxyl-terminal hydrolase FAF-X;Probable ubiquitin carboxyl-terminal hydrolase FAF-Y	Q93008;O00507	YRLVGVLVHSGQASGGHYYSYIIQR	25	2822.46	8.3291e-05	91.128	10253000	1	18.8271	22.4576	17.3119	20.7246	20.4202	19.4769	0.161287	1	0.675028	0.243498
1062	UTP20	Small subunit processome component 20 homolog	O75691	EQSSVLITLLLPFLHR	16	1865.08	0.013651	64.65	19610000	5	21.5836	22.7964	19.9264	21.226	21.3752	21.5232	0.0242639	1	-0.0606511	-0.0297861
1063	VAC14	Protein VAC14 homolog	Q08AM6	ALYGLLMLLPQSSAFQLLSHR	21	2357.29	3.6751e-09	128.14	38496000	7	22.2925	23.6261	21.3283	21.9205	22.0268	23.1852	0.0162401	1	-0.0381724	-0.0192827
1064	VAC14	Protein VAC14 homolog	Q08AM6	FASTMVHALNTILLTSTELFQLR	23	2605.39	2.8673e-09	129.32	31310000	6	22.0799	22.4674	20.4547	20.6594	22.4145	23.5631	0.200881	1	0.545008	0.242717
1065	VARS	Valine--tRNA ligase	P26640	LPALEQGPGGLWVWGATAVAQLLWPAGLGGPGGSR	35	3438.82	2.9947e-18	173.6	48086000	5	23.6258	22.522	20.8784	21.6612	22.5075	24.0944	0.14285	1	0.412303	0.181602
1066	VAT1	Synaptic vesicle membrane protein VAT-1 homolog	Q99536	TWWNQFSVTALQLLQANR	18	2175.12	9.8153e-38	262.24	77674000	8	23.1099	24.7101	20.9293	23.1366	23.1528	24.2982	0.203683	1	0.612777	0.259515
1067	VCP	Transitional endoplasmic reticulum ATPase	P55072	AHVIVMAATNRPNSIDPALR	20	2145.15	3.3376e-05	94.203	4822900	1	19.2597	21.5285	20.037	16.5271	17.8826	17.8796	1.61869	0.6152	-2.84531	-1.41963
1068	VCP	Transitional endoplasmic reticulum ATPase	P55072	AHVIVMAATNRPNSIDPALRR	21	2301.25	6.8953e-06	101.67	5283700	1	18.6716	21.8752	16.8113	19.787	18.2309	17.7358	0.121825	1	-0.534778	-0.190803
1069	VCP	Transitional endoplasmic reticulum ATPase	P55072	NVFIIGATNRPDIIDPAILRPGR	23	2517.42	0.00035904	89.028	26915000	6	21.5341	23.6963	20.7875	21.545	18.9676	22.2255	0.342538	1	-1.09328	-0.433659
1070	VCP	Transitional endoplasmic reticulum ATPase	P55072	PYFLEAYRPIR	11	1423.76	0.00031445	95.573	11387000	3	20.6441	21.5267	20.5844	20.8471	20.0832	21.0411	0.244469	1	-0.261293	-0.161067
1071	VCPIP1	Deubiquitinating protein VCIP135	Q96JH7	NIHIFGLANVLHRPIILLDSLSGMR	25	2798.57	0.00013212	88.976	22026000	4	19.4699	22.865	17.6747	22.4328	22.357	21.3251	0.580267	1	2.03514	0.73651
1072	VPS29	Vacuolar protein sorting-associated protein 29	Q9UBQ0	IGLIHGHQVIPWGDMASLALLQR	23	2524.37	0.0022904	67.563	22293000	4	21.4933	23.2382	20.2367	21.802	20.4365	21.58	0.147331	1	-0.383206	-0.176784
1073	VPS29	Vacuolar protein sorting-associated protein 29	Q9UBQ0	MLVLVLGDLHIPHR	14	1611.93	0.0023379	82.362	4263500	1	17.6018	20.9511	19.2154	18.3408	19.4294	19.1691	0.0968703	1	-0.27637	-0.124421
1074	VPS35	Vacuolar protein sorting-associated protein 35	Q96QK1	AQLAAITLIIGTFER	15	1615.93	4.9856e-16	201	29718000	5	21.9141	23.7825	21.2968	19.2009	21.5017	22.307	0.483812	1	-1.32791	-0.554791
1075	VPS35	Vacuolar protein sorting-associated protein 35	Q96QK1	FTLPPLVFAAYQLAFR	16	1853.02	2.8978e-23	205.32	329020000	6	26.1897	25.9426	21.1677	24.6786	24.4827	27.0119	0.202379	1	0.957703	0.316581
1076	VPS35	Vacuolar protein sorting-associated protein 35	Q96QK1	IRFTLPPLVFAAYQLAFR	18	2122.21	3.3868e-08	133.86	108770000	3	21.067	25.8679	20.3784	23.5752	24.4188	23.1095	0.288651	1	1.26345	0.425611
1077	VPS35	Vacuolar protein sorting-associated protein 35	Q96QK1	LFDIFSQQVATVIQSR	16	1850.99	2.7927e-05	104.41	6106000	1	18.8641	21.6194	19.0855	18.8009	18.8396	19.819	0.30279	1	-0.703143	-0.327875
1078	WAPAL	Wings apart-like protein homolog	Q7Z5K2	IGGQVHAVQALVQLFLER	18	1977.12	2.7291e-07	121.19	22195000	5	21.356	22.7232	20.0467	21.3442	21.4619	22.5052	0.174948	1	0.395158	0.192173
1079	WARS2	Tryptophan--tRNA ligase, mitochondrial	Q9UGM6	VFSGIQPTGILHLGNYLGAIESWVR	25	2726.45	7.9127e-15	169.42	28970000	5	21.9263	22.0533	21.1912	22.6529	22.2725	22.649	1.26634	1	0.801188	0.535246
1080	WDR1	WD repeat-containing protein 1	O75083	DHLLSVSLSGYINYLDR	17	1964	9.3582e-13	171.08	20859000	4	21.5919	22.6821	20.6457	20.8341	21.3348	22.1987	0.0923479	1	-0.184022	-0.0963152
1081	WDR6	WD repeat-containing protein 6	Q9NNW5	ISWGQGHFWELWR	13	1700.82	2.7021e-05	109	13318000	3	21.2392	22.2449	19.4853	20.476	20.397	21.1329	0.141801	1	-0.321191	-0.157495
1082	WDR82	WD repeat-containing protein 82	Q6UXN9	LILISTNGSFIR	12	1332.78	0.00012875	102.61	9755100	2	19.9196	21.362	20.9706	19.8905	20.218	20.7969	0.371809	1	-0.448908	-0.263191
1083	XPO1	Exportin-1	O14980	AIIASNIMYIVGQYPR	16	1807.97	0.00045759	92.063	26701000	3	21.7382	23.6381	21.0818	20.6479	20.3241	22.2455	0.48451	1	-1.08018	-0.497856
1084	XPO1	Exportin-1	O14980	ETLVYLTHLDYVDTER	16	1965.97	5.3574e-06	118.33	4862000	1	18.0113	22.1078	16.2505	18.1295	17.0556	18.5392	0.188282	1	-0.881766	-0.294845
1085	XPO5	Exportin-5	Q9HAV4	LLDNLLALIR	10	1152.72	3.321e-06	157.68	15058000	3	20.7297	21.2685	21.6124	20.1413	19.7777	22.3992	0.192156	1	-0.430809	-0.209203
1086	XPO5	Exportin-5	Q9HAV4	YLESFLAFTTHPSQFLR	17	2056.04	1.4694e-05	108.34	21999000	4	21.5218	23.2928	19.5986	21.6684	20.7063	21.4548	0.0610206	1	-0.194523	-0.0843596
1087	XRCC1	DNA repair protein XRCC1	P18887	ILQGVVVVLSGFQNPFR	17	1872.06	1.0391e-11	151.78	33948000	5	22.0561	23.5996	21.2436	21.4563	22.3209	22.5817	0.0827136	1	-0.180089	-0.0914107
1088	XRCC5	X-ray repair cross-complementing protein 5	P13010	LTIGSNLSIR	10	1072.62	3.6197e-05	144.09	31645000	10	20.7422	22.8628	22.6619	22.2498	21.6577	22.8056	0.0690461	1	0.148728	0.0761631
1089	YBX1;YBX3	Nuclease-sensitive element-binding protein 1;Y-box-binding protein 3	P67809;P16989	EDVFVHQTAIKKNNPR	16	2123.09	3.9222e-05	102.28	21720000	6	21.6541	21.8466	22.2952	21.378	21.7086	21.6755	0.726755	1	-0.344585	-0.243168
1090	YIPF3	Protein YIPF3;Protein YIPF3, 36 kDa form III	Q9GZM5	AFSLYANIDILRPYFDVEPAQVR	23	2696.4	1.97e-09	141.47	19530000	4	21.3218	22.2994	20.3501	21.7372	21.5905	21.841	0.283525	1	0.399119	0.225826
1091	YWHAE	14-3-3 protein epsilon	P62258	VAGMDVELTVEER	13	1446.7	9.9885e-08	136.48	8179400	3	19.4604	20.9124	19.8995	20.8688	17.6655	21.3054	0.0400094	1	-0.144205	-0.0594571
1092	YWHAE;YWHAZ;YWHAQ;YWHAH;YWHAB;YWHAG;SFN	14-3-3 protein epsilon;14-3-3 protein zeta/delta;14-3-3 protein theta;14-3-3 protein eta;14-3-3 protein beta/alpha;14-3-3 protein beta/alpha, N-terminally processed;14-3-3 protein gamma;14-3-3 protein gamma, N-terminally processed;14-3-3 protein sigma	P62258;P63104;P27348;Q04917;P31946;P61981;P31947	DSTLIMQLLR	10	1188.65	7.8556e-07	170.66	83159000	19	22.1608	25.0454	23.1288	23.6431	21.4667	24.1544	0.109157	1	-0.356914	-0.14983
1093	ZC3HC1	Nuclear-interacting partner of ALK	Q86WB0	ISLLLHLLEDELDHR	15	1814.99	3.309e-08	140.84	12586000	2	20.4679	22.503	19.82	19.7673	21.0439	20.2082	0.264685	1	-0.590487	-0.282426
1094	ZCCHC3	Zinc finger CCHC domain-containing protein 3	Q9NUD5	DFVVGALILR	10	1101.65	0.039943	54.549	2127000	0	17.175	19.8015	18.3623	17.6711	17.6082	18.9867	0.151191	1	-0.357611	-0.171733
1095	ZMPSTE24	CAAX prenyl protease 1 homolog	O75844	DNLGFPVSDWLFSMWHYSHPPLLER	25	3042.45	2.9307e-14	155.05	118410000	15	23.9517	25.2297	22.0731	23.7318	24.2085	24.5819	0.16799	1	0.42254	0.196609
1096	ZNHIT2	Zinc finger HIT domain-containing protein 2	Q9UHR6	LLPPWRPWWWNR	12	1705.9	0.0009819	93.058	8139100	2	20.0756	21.6723	17.897	19.6399	19.9119	20.6493	0.0564242	1	0.18539	0.0793987
