# Supplementary material for: EDF1 coordinates cellular responses to ribosome collisions
Source: eLife. 2020 Aug 3;9:e58828. doi: 10.7554/eLife.58828 (PMC7486125; doi:10.7554/eLife.58828)
Supplement: Figure 2—source data 1. — 16plex TMT-MS3 analysis of HCT116 WT, ΔZNF598, and ZNF598-OE cells. [file elife-58828-fig2-data1.xlsx]

## Sheet: Fig2-source-data-1
Sinha N. et al. (2020)
Figure 2-source data 1: Related to Figure 2 and Figure 2-figure supplement 1
Monosome dataset: See "Monosome" sheet
Polysome dataset: See "Polysome" sheet

## Sheet: Monosome
Sucrose gradient fraction (monosome) analysis with or without low emetine treatment. 16plex TMT-MS3 analysis of HCT116 cells. Analysed with Comet (2018.01 rev. 2)
Related to Figure 2A-2E and Figure 2-figure supplement 1A-1C
					Annotations		TMT intensity (sum signal to noise)																	Ratio to WT-UT average																	Welch's t-test - WT (EL/UT) (S0>1 & 1%FDR)				Welch's t-test - ZNF598 KO (EL/UT) (S0>1 & 1%FDR)				Welch's t-test - ZNF598 OE (EL/UT) (S0>1 & 1%FDR)
Rank	UniProt ID	Gene Symbol	Description	Quantified Peptides	Ribosome_Full_List	Ribosome_Detailed	WT-UT1_sn sum	WT-UT2_sn sum	WT-UT3_sn sum	WT-EL1_sn sum	WT-EL2_sn sum	WT-EL3_sn sum	ZNF598_KO-UT1_sn sum	ZNF598_KO-UT2_sn sum	ZNF598_KO-EL1_sn sum	ZNF598_KO-EL2_sn sum	ZNF598_KO-EL3_sn sum	ZNF598_OE-UT1_sn sum	ZNF598_OE-UT2_sn sum	ZNF598_OE-EL1_sn sum	ZNF598_OE-EL2_sn sum	ZNF598_OE-EL3_sn sum		WT-UT1_ratio	WT-UT2_ratio	WT-UT3_ratio	WT-EL1_ratio	WT-EL2_ratio	WT-EL3_ratio	ZNF598_KO-UT1_ratio	ZNF598_KO-UT2_ratio	ZNF598_KO-EL1_ratio	ZNF598_KO-EL2_ratio	ZNF598_KO-EL3_ratio	ZNF598_OE-UT1_ratio	ZNF598_OE-UT2_ratio	ZNF598_OE-EL1_ratio	ZNF598_OE-EL2_ratio	ZNF598_OE-EL3_ratio		Significant WT (EL/UT)	-Log10 (p-value) WT (EL/UT)	q-value WT (EL/UT)	Log2 Ratio WT (EL/UT)	Significant ZNF598 KO (EL/UT)	-Log10 (p-value) ZNF598 KO (EL/UT)	q-value ZNF598 KO (EL/UT)	Log2 Ratio ZNF598 KO (EL/UT)	Significant ZNF598 OE (EL/UT)
1	P01023	A2M	Alpha-2-macroglobulin OS=Homo sapiens OX=9606 GN=A2M PE=1 SV=3	10			2269.4	2359.16	2353.28	2062.69	1866.3	1727.53	3151.82	2399.88	2540.25	2553.47	2182.45	2381.07	2536.52	2049.77	2145.51	1926.28		0.97513	1.0137	1.01117	0.886309	0.801923	0.742296	1.35429	1.0312	1.09151	1.09719	0.937769	1.02311	1.08991	0.880758	0.921896	0.827696			1.80357	0.187214	-0.307279		0.43402	0.234873	-0.185114
2	Q9NRG9	AAAS	Aladin OS=Homo sapiens OX=9606 GN=AAAS PE=1 SV=1	9			1589.48	2040.62	2175.36	1327.83	1210.29	1253.32	916.22	1064.42	719.841	679.172	845.126	859.416	918.921	484.379	512.321	500.816		0.821372	1.0545	1.12413	0.686163	0.625423	0.647659	0.473461	0.550044	0.371981	0.350965	0.436723	0.444107	0.474857	0.250305	0.264744	0.258799		+	1.8637	0.00320481	-0.60288	+	1.16377	0.00716719	-0.406971	+
3	Q6PD74	AAGAB	Alpha- and gamma-adaptin-binding protein p34 OS=Homo sapiens OX=9606 GN=AAGAB PE=1 SV=1	3			766.176	912.431	1102.79	594.062	513.71	495.485	553.724	657.76	423.788	398.235	456.942	504.53	501.546	279.536	262.366	310.951		0.826393	0.984143	1.18946	0.640752	0.554085	0.534427	0.597244	0.709456	0.457095	0.429534	0.492855	0.544183	0.540965	0.301506	0.282987	0.33539		+	1.98793	0.000700297	-0.783356	+	1.62189	0.00210749	-0.503706	+
4	Q13685	AAMP	Angio-associated migratory cell protein OS=Homo sapiens OX=9606 GN=AAMP PE=1 SV=2	3			378.447	437.452	459.913	289.664	254.09	261.131	223.445	277.45	174.861	150.098	181.487	222.613	234.062	144.254	115.118	129.348		0.889897	1.02864	1.08146	0.681129	0.597478	0.614035	0.525418	0.652408	0.411176	0.352947	0.426756	0.523462	0.550384	0.339205	0.270693	0.304155		+	2.5349	0.0013822	-0.662028	+	1.42159	0.00143117	-0.565414	+
5	Q9Y312	AAR2	Protein AAR2 homolog OS=Homo sapiens OX=9606 GN=AAR2 PE=1 SV=2	7			1702.23	2098.26	2230.42	1370.62	1219.85	1256.4	1185.82	1328.82	815.224	780.155	912.466	1119.77	1123.56	575.706	616.664	678.059		0.846753	1.04375	1.10949	0.681798	0.606799	0.62498	0.589871	0.661005	0.405523	0.388078	0.453895	0.557015	0.558901	0.286378	0.306752	0.337292		+	2.12338	0.00176509	-0.641036	+	1.93758	0.00110283	-0.589701	+
6	P49588	AARS	Alanine--tRNA ligase, cytoplasmic OS=Homo sapiens OX=9606 GN=AARS PE=1 SV=2	8			1359.87	1746.29	1837.74	1243.39	1162.48	1141.28	931.822	998.639	678.79	609.861	714.602	1202.95	1265.97	812.136	808.61	841.945		0.825181	1.05966	1.11516	0.754499	0.705403	0.692538	0.565437	0.605983	0.411895	0.370069	0.433626	0.72996	0.768201	0.492811	0.490671	0.510899			1.54659	0.0185317	-0.467852	+	1.95823	0.00142964	-0.533814	+
7	Q5JTZ9	AARS2	Alanine--tRNA ligase, mitochondrial OS=Homo sapiens OX=9606 GN=AARS2 PE=1 SV=1	1			87.6722	107.239	120.136	69.7894	67.8677	68.8143	75.7402	89.3404	58.6207	59.192	80.6764	69.8176	68.7536	38.7083	43.0797	49.1735		0.834848	1.02117	1.14398	0.664561	0.646262	0.655276	0.721227	0.850733	0.558209	0.563649	0.768232	0.66483	0.654698	0.368595	0.410221	0.468249		+	1.95917	0.00320629	-0.597677		0.65544	0.0301181	-0.330533	+
8	Q9BTE6	AARSD1	Alanyl-tRNA editing protein Aarsd1 OS=Homo sapiens OX=9606 GN=AARSD1 PE=1 SV=2	9			2442.54	2983.09	3269.36	1818.42	1666.2	1695.61	1119.18	1317.16	760.422	698.334	858.524	1168.44	1215.54	639.668	626.816	683.847		0.84274	1.02924	1.12802	0.627403	0.574883	0.58503	0.386147	0.454455	0.262366	0.240944	0.296213	0.403142	0.419393	0.220702	0.216268	0.235945		+	2.32229	0.000642468	-0.737715	+	1.72332	0.00106854	-0.657672	+
9	Q9NY61	AATF	Protein AATF OS=Homo sapiens OX=9606 GN=AATF PE=1 SV=1	3			475.183	587.326	616.87	349.264	289.46	341.472	401.718	442.696	241.076	229.018	241.669	462.816	443.231	186.518	178.656	211.394		0.848855	1.04918	1.10196	0.623916	0.517084	0.609997	0.717619	0.790821	0.430652	0.409112	0.431711	0.826763	0.791777	0.333191	0.319147	0.377629		+	2.23855	0.000636364	-0.772721	+	3.0542	0.000213058	-0.830256	+
10	O75027	ABCB7	ATP-binding cassette sub-family B member 7, mitochondrial OS=Homo sapiens OX=9606 GN=ABCB7 PE=1 SV=2	1			382.416	458.355	464.712	302.452	255.027	304.819	223.366	243.136	141.717	114.575	151.213	245.543	245.526	117.39	137.562	127.932		0.878792	1.0533	1.06791	0.695035	0.586052	0.700474	0.513295	0.558727	0.325666	0.263293	0.347487	0.564258	0.564219	0.269762	0.316117	0.293988		+	2.07497	0.00308808	-0.597545	+	1.77659	0.000521945	-0.788624	+
11	P33527	ABCC1	Multidrug resistance-associated protein 1 OS=Homo sapiens OX=9606 GN=ABCC1 PE=1 SV=3	5			561.01	769.122	739.121	492.942	474.896	573.325	507.515	543.222	369.084	319.614	403.006	552.575	591.325	361.72	404.752	380.389		0.813351	1.11507	1.07158	0.714667	0.688504	0.831206	0.735795	0.787562	0.535097	0.463376	0.584278	0.801122	0.857302	0.524421	0.586809	0.551487			1.18245	0.0554789	-0.416222	+	1.57689	0.00161651	-0.535469	+
12	Q92887	ABCC2	Canalicular multispecific organic anion transporter 1 OS=Homo sapiens OX=9606 GN=ABCC2 PE=1 SV=3	1			138.741	220.813	200.282	157.396	156.267	189.454	104.18	129.573	103.187	73.7724	97.9225	190.617	208.296	136.495	143.114	133.532		0.743473	1.18327	1.07325	0.84344	0.83739	1.01523	0.558271	0.694344	0.552949	0.395325	0.524738	1.02146	1.1162	0.731437	0.766907	0.71556			0.232442	0.648633	-0.132331		0.671938	0.0204346	-0.357713	+
13	O15439	ABCC4	Multidrug resistance-associated protein 4 OS=Homo sapiens OX=9606 GN=ABCC4 PE=1 SV=3	2			102.93	158.336	160.542	106.94	108.721	113.898	91.6007	111.643	70.2804	67.6057	70.5079	129.74	123.527	71.4264	86.5793	88.6994		0.732063	1.12612	1.14181	0.760583	0.77325	0.81007	0.651486	0.794032	0.499851	0.480828	0.501469	0.922742	0.878554	0.508002	0.615773	0.630851			0.703864	0.226497	-0.327476	+	1.80282	0.00144043	-0.542072	+
14	P28288	ABCD3	ATP-binding cassette sub-family D member 3 OS=Homo sapiens OX=9606 GN=ABCD3 PE=1 SV=1	16			2350.95	3447.13	3568.02	2784.42	2501.06	2631.06	1801.82	2315.44	1828.25	1752.07	1773.84	1898.65	2241.42	1960.7	1983.24	2205.48		0.753019	1.10413	1.14285	0.891861	0.8011	0.842739	0.57713	0.741645	0.585596	0.561195	0.568168	0.608145	0.717936	0.62802	0.63524	0.706424			0.481559	0.422473	-0.219401		0.60261	0.195818	-0.194904
15	P61221	ABCE1	ATP-binding cassette sub-family E member 1 OS=Homo sapiens OX=9606 GN=ABCE1 PE=1 SV=1	5			1025.19	1230.59	1305.17	750.102	690.388	691.635	605.098	633.264	404.326	347.821	390.757	657.984	680.064	380.785	336.96	372.284		0.863694	1.03674	1.09957	0.63194	0.581632	0.582683	0.509778	0.533507	0.340633	0.293029	0.329202	0.554333	0.572935	0.320801	0.283879	0.313639		+	2.55069	0.000666667	-0.733586	+	2.3838	0.00045929	-0.703276	+
16	Q8NE71	ABCF1	ATP-binding cassette sub-family F member 1 OS=Homo sapiens OX=9606 GN=ABCF1 PE=1 SV=2	8			1652.35	1739.27	1489.55	916.413	858.58	829.782	1018	833.818	551.605	460.832	615.434	994.542	909.118	526.772	533.942	493.188		1.01555	1.06897	0.915487	0.563234	0.527689	0.50999	0.62567	0.51247	0.33902	0.28323	0.37825	0.611252	0.55875	0.323758	0.328164	0.303117		+	3.4989	0.000227723	-0.904326	+	1.57199	0.000469584	-0.773872	+
17	Q9UG63	ABCF2	ATP-binding cassette sub-family F member 2 OS=Homo sapiens OX=9606 GN=ABCF2 PE=1 SV=2	10			2225.06	2789.16	2748.8	1569.72	1473.9	1503.08	1554.39	1442.51	791.888	699.154	819.76	1562.99	1473.07	640.505	688.167	696.102		0.859869	1.07786	1.06227	0.606614	0.569585	0.580862	0.60069	0.557454	0.306023	0.270186	0.316794	0.604014	0.569264	0.247522	0.26594	0.269007		+	2.66746	0.000469526	-0.764803	+	2.6416	0	-0.962357	+
18	Q9NUQ8	ABCF3	ATP-binding cassette sub-family F member 3 OS=Homo sapiens OX=9606 GN=ABCF3 PE=1 SV=2	1			132.966	139.856	172.024	107.852	103.399	103.899	87.435	94.7164	65.1147	62.061	65.042	79.3781	100.96	58.5256	47.114	54.7341		0.89671	0.943176	1.16011	0.727344	0.697313	0.700685	0.589653	0.638759	0.439127	0.418534	0.438637	0.535319	0.680865	0.394691	0.317732	0.369122			1.87611	0.0111073	-0.488384	+	2.6352	0.00148589	-0.506565	+
19	Q9NUJ1	ABHD10	Mycophenolic acid acyl-glucuronide esterase, mitochondrial OS=Homo sapiens OX=9606 GN=ABHD10 PE=1 SV=1	5			682.549	879.23	889.869	549.818	565.196	541.83	447.976	508.838	369.855	313.415	354.05	602.51	647.852	433.822	437.555	465.878		0.835212	1.07588	1.0889	0.672794	0.691612	0.663019	0.548173	0.622648	0.452579	0.383515	0.433239	0.737271	0.792755	0.530854	0.535421	0.570079		+	1.93355	0.00486771	-0.555073	+	1.57553	0.00324469	-0.468985	+
20	Q96IU4	ABHD14B	Protein ABHD14B OS=Homo sapiens OX=9606 GN=ABHD14B PE=1 SV=1	2			1298.5	1624.4	1546.92	725.748	603.607	631.706	496.052	575.992	296.66	247.082	342.103	623.635	624.941	269.657	238.744	271.451		0.871512	1.09025	1.03824	0.487099	0.405122	0.423981	0.332934	0.386587	0.199109	0.165834	0.229609	0.418564	0.41944	0.180985	0.160237	0.182189		+	3.14236	0	-1.18653	+	1.68942	0.000180233	-0.86886	+
21	O95870	ABHD16A	Protein ABHD16A OS=Homo sapiens OX=9606 GN=ABHD16A PE=1 SV=3	2			244.243	311.044	342.657	204.473	185.738	195.742	195.96	216.79	152.699	148.813	174.674	175.572	187.723	98.9588	97.251	129.475		0.816007	1.03919	1.14481	0.683137	0.620544	0.653967	0.654696	0.724288	0.510162	0.497179	0.58358	0.58658	0.627176	0.330618	0.324912	0.432572		+	1.79233	0.00331779	-0.602689	+	1.41808	0.00793867	-0.380477	+
22	Q8IZP0	ABI1	Abl interactor 1 OS=Homo sapiens OX=9606 GN=ABI1 PE=1 SV=4	3			333.639	455.203	502.758	369.65	328.221	326.758	195.479	263.535	191.626	178.84	194.04	266.917	270.008	179.891	193.612	206.304		0.774943	1.0573	1.16776	0.858586	0.762359	0.758961	0.454039	0.612113	0.44509	0.415392	0.450697	0.619968	0.627148	0.417833	0.449703	0.479182			0.774779	0.238068	-0.315204		0.691541	0.0709561	-0.271399	+
23	Q9NYB9	ABI2	Abl interactor 2 OS=Homo sapiens OX=9606 GN=ABI2 PE=1 SV=1	2			492.92	628.983	695.767	425.258	398.27	402.054	306.512	358.686	229.454	189.963	236.111	377.513	332.558	199.765	209.345	225.798		0.813547	1.03811	1.14834	0.701873	0.657331	0.663576	0.505887	0.591999	0.378706	0.313527	0.389693	0.623072	0.548875	0.329705	0.345517	0.372672		+	1.67508	0.00576569	-0.554501	+	1.54854	0.00107654	-0.608203	+
24	P09110	ACAA1	3-ketoacyl-CoA thiolase, peroxisomal OS=Homo sapiens OX=9606 GN=ACAA1 PE=1 SV=2	6			544.694	660.603	753.349	410.967	375.883	381.722	331.299	375.002	240.886	226.066	278.583	448.629	435.534	242.496	227.212	253.594		0.834292	1.01183	1.15388	0.629466	0.575729	0.584672	0.507441	0.574379	0.368958	0.346259	0.426697	0.687152	0.667095	0.371424	0.348014	0.388422		+	2.18065	0.0006	-0.733573	+	1.50418	0.00210266	-0.509782	+
25	P42765	ACAA2	3-ketoacyl-CoA thiolase, mitochondrial OS=Homo sapiens OX=9606 GN=ACAA2 PE=1 SV=2	2			210.622	258.527	270.394	162.587	147.14	154.665	255.356	262.6	186.105	172.765	191.687	191.632	189.805	118.091	118.845	124.174		0.854401	1.04873	1.09687	0.659544	0.596882	0.627408	1.03587	1.06525	0.754946	0.700831	0.77759	0.777367	0.769955	0.479043	0.482102	0.503719		+	2.3035	0.00151351	-0.664162	+	2.44649	0.00159722	-0.498128	+
26	Q13085	ACACA	Acetyl-CoA carboxylase 1 OS=Homo sapiens OX=9606 GN=ACACA PE=1 SV=2	12			1804.13	2217.38	2396.43	1498.31	1372.71	1339.63	866.551	987.054	712.364	641.835	794.765	1074.77	1093.94	580.195	640.41	763.356		0.843322	1.03649	1.12019	0.70037	0.641659	0.626196	0.40506	0.461388	0.332987	0.300019	0.371505	0.50239	0.511351	0.271206	0.299353	0.356823		+	1.98339	0.00319477	-0.599616	+	1.16124	0.00939426	-0.374092	+
27	O00763	ACACB	Acetyl-CoA carboxylase 2 OS=Homo sapiens OX=9606 GN=ACACB PE=1 SV=3	5			1125.83	1429.07	1576.55	909.792	844.142	875.281	536.444	633.098	431.373	404.212	492.426	707.114	753.3	388.533	414.139	448.554		0.817507	1.0377	1.14479	0.660634	0.612963	0.635574	0.389532	0.459716	0.313236	0.293513	0.357569	0.513462	0.546999	0.282128	0.300722	0.325712		+	1.90752	0.00209593	-0.638617	+	1.19207	0.00744761	-0.40161	+
28	Q709F0	ACAD11	Acyl-CoA dehydrogenase family member 11 OS=Homo sapiens OX=9606 GN=ACAD11 PE=1 SV=3	5			1667.12	2042.75	2113.89	1315.27	1167.92	1188.92	934.025	955.58	664.078	628.61	769.102	1078.11	1092.47	546.636	539.174	640.146		0.858785	1.05228	1.08893	0.677537	0.601632	0.61245	0.481145	0.492249	0.342087	0.323817	0.396188	0.555368	0.562765	0.281589	0.277745	0.329759		+	2.2792	0.0015328	-0.659606	+	1.58535	0.00327812	-0.464355	+
29	Q9H845	ACAD9	Acyl-CoA dehydrogenase family member 9, mitochondrial OS=Homo sapiens OX=9606 GN=ACAD9 PE=1 SV=1	5			1022.03	1270.64	1296.69	898.002	776.013	820.366	675.135	799.849	558.219	522.892	608.168	577.618	635.088	327.992	367.421	429.943		0.854216	1.06201	1.08378	0.750553	0.648594	0.685665	0.56428	0.668517	0.466561	0.437035	0.508309	0.482775	0.530809	0.274137	0.307092	0.359348		+	1.83767	0.00793682	-0.519515	+	1.29503	0.00790161	-0.386847	+
30	P11310	ACADM	Medium-chain specific acyl-CoA dehydrogenase, mitochondrial OS=Homo sapiens OX=9606 GN=ACADM PE=1 SV=1	5			788.206	919.611	918.637	596.545	525.476	525.164	654.002	680.383	454.765	418.386	439.662	683.932	684.491	393.195	407.424	415.843		0.900308	1.0504	1.04929	0.681388	0.600212	0.599855	0.747017	0.77715	0.519444	0.477891	0.502193	0.781204	0.781842	0.449117	0.46537	0.474986		+	2.66065	0.000887955	-0.672022	+	2.92765	0.00108975	-0.609038	+
31	P45954	ACADSB	Short/branched chain specific acyl-CoA dehydrogenase, mitochondrial OS=Homo sapiens OX=9606 GN=ACADSB PE=1 SV=1	3			517.84	662.079	667.674	373.248	353.93	332.869	263.091	334.117	187.899	166.549	218.743	340.633	315.638	161.173	149.971	181.158		0.840835	1.07504	1.08413	0.606056	0.574688	0.540491	0.42719	0.542517	0.305098	0.270431	0.35518	0.553097	0.512512	0.261702	0.243513	0.294152		+	2.44579	0.000391304	-0.793367	+	1.33788	0.00113642	-0.642911	+
32	P49748	ACADVL	Very long-chain specific acyl-CoA dehydrogenase, mitochondrial OS=Homo sapiens OX=9606 GN=ACADVL PE=1 SV=1	9			1582.71	1969.22	1968.52	1238.84	1206.02	1189.66	1357.36	1501.06	1006.33	901.583	1053.68	1806.38	1886.22	1270.74	1226.96	1300.86		0.860098	1.07014	1.06976	0.673228	0.655392	0.646502	0.737636	0.815727	0.546874	0.489951	0.572605	0.981648	1.02504	0.690563	0.666772	0.706932		+	2.30178	0.00270713	-0.59578	+	1.87329	0.00141826	-0.535035	+
33	P24752	ACAT1	Acetyl-CoA acetyltransferase, mitochondrial OS=Homo sapiens OX=9606 GN=ACAT1 PE=1 SV=1	6			1610.78	1908.58	1949.4	956.783	893.024	926.049	654.029	746.232	380.859	329.849	413.406	724.592	730.447	347.587	343.686	329.497		0.883626	1.04699	1.06938	0.524863	0.489887	0.508003	0.358781	0.409361	0.208928	0.180945	0.226782	0.39749	0.400702	0.190676	0.188536	0.180752		+	3.35073	0	-0.973698	+	2.10766	0.000219858	-0.904949	+
34	Q9BWD1	ACAT2	Acetyl-CoA acetyltransferase, cytosolic OS=Homo sapiens OX=9606 GN=ACAT2 PE=1 SV=2	5			1429.37	1864.56	1883.43	1112.15	950.992	988.126	595.582	709.542	400.613	353.776	478.468	621.476	620.804	341.112	321.165	346.689		0.828243	1.08041	1.09135	0.644431	0.551048	0.572566	0.345108	0.411141	0.232134	0.204994	0.277246	0.360112	0.359722	0.197656	0.186098	0.200888		+	2.16647	0.000660448	-0.754651	+	1.42579	0.00115482	-0.672771	+
35	Q9H3P7	ACBD3	Golgi resident protein GCP60 OS=Homo sapiens OX=9606 GN=ACBD3 PE=1 SV=4	4			364.069	445.633	462.97	324.778	281.104	270.876	415.047	442.239	311.387	294.227	347.13	357.656	402.346	250.549	240.972	245.333		0.8582	1.05047	1.09133	0.765581	0.662631	0.638521	0.978368	1.04247	0.734016	0.693565	0.818271	0.843083	0.948428	0.590605	0.56803	0.57831		+	1.78789	0.00663528	-0.534265	+	1.69041	0.00365224	-0.435346	+
36	Q96AP0	ACD	Adrenocortical dysplasia protein homolog OS=Homo sapiens OX=9606 GN=ACD PE=1 SV=3	3			218.712	255.937	299.602	150.898	125.723	134.093	154.533	178.376	93.165	83.6254	111.737	163.654	151.625	63.962	73.8815	75.8353		0.847446	0.991682	1.16087	0.584686	0.48714	0.519572	0.598771	0.691156	0.360988	0.324024	0.432949	0.634112	0.587503	0.247834	0.28627	0.29384		+	2.40141	0.00017795	-0.906937	+	1.70161	0.00052506	-0.798092	+
37	Q9UKV3	ACIN1	Apoptotic chromatin condensation inducer in the nucleus OS=Homo sapiens OX=9606 GN=ACIN1 PE=1 SV=2	13			1739.18	2186.44	2420.47	1837.53	1858.31	1801.1	794.211	1233.51	931.157	972.66	1109.61	594.813	795.237	632.053	468.166	501.974		0.822166	1.0336	1.14423	0.868659	0.878483	0.851438	0.375449	0.58312	0.440188	0.459808	0.524548	0.281187	0.375934	0.298792	0.221317	0.237299			0.614621	0.453825	-0.19388		0.0219569	0.924958	0.0172037
38	P53396	ACLY	ATP-citrate synthase OS=Homo sapiens OX=9606 GN=ACLY PE=1 SV=3	11			1276.1	1589.68	1618.6	1011.68	901.676	831.216	1414.22	1587.63	1102.53	1026.75	1192.11	1044.21	1236.42	683.254	663.303	692.19		0.853697	1.06348	1.08283	0.676803	0.603211	0.556074	0.946097	1.06211	0.73758	0.686884	0.797508	0.698565	0.827151	0.457089	0.443742	0.463067		+	2.16337	0.000833819	-0.704832	+	1.64228	0.00354811	-0.439301	+
39	P21399	ACO1	Cytoplasmic aconitate hydratase OS=Homo sapiens OX=9606 GN=ACO1 PE=1 SV=3	3			99.6822	123.832	134.933	79.3759	62.1891	74.7516	71.5106	79.3516	51.1412	46.982	51.6909	93.0585	87.6535	58.8345	51.5653	69.5452		0.834284	1.0364	1.12931	0.664331	0.520488	0.625629	0.598503	0.664128	0.428023	0.393213	0.432624	0.778847	0.73361	0.492411	0.431572	0.582054		+	1.90588	0.000841795	-0.724784	+	2.30727	0.00107596	-0.594373	+
40	Q99798	ACO2	Aconitate hydratase, mitochondrial OS=Homo sapiens OX=9606 GN=ACO2 PE=1 SV=2	4			579.561	665.959	751.811	434.793	400.623	389.464	404.015	462.122	295.337	266.713	318.587	466.126	466.282	314.211	298.855	339.665		0.870503	1.00027	1.12922	0.653061	0.601738	0.584977	0.606832	0.694109	0.443597	0.400604	0.478519	0.700123	0.700358	0.471946	0.448882	0.510178		+	2.38423	0.000770865	-0.6989	+	1.73366	0.00131674	-0.561562	+
41	Q8WXI4	ACOT11	Acyl-coenzyme A thioesterase 11 OS=Homo sapiens OX=9606 GN=ACOT11 PE=1 SV=1	5			539.42	679.85	752.003	438.056	414.364	409.69	453.384	534.073	355.931	308.72	415.351	492.497	507.08	278.016	278.857	301.652		0.820921	1.03464	1.14444	0.66666	0.630604	0.623491	0.689987	0.812784	0.541677	0.469828	0.632106	0.749511	0.771704	0.423101	0.424381	0.459072		+	1.91416	0.00230437	-0.630272	+	1.06921	0.00411111	-0.461476	+
42	O00154	ACOT7	Cytosolic acyl coenzyme A thioester hydrolase OS=Homo sapiens OX=9606 GN=ACOT7 PE=1 SV=3	15			2080.58	2500.23	2639.16	1590.47	1452.91	1463.81	1768.05	1953.29	1302.53	1192.55	1421.34	1718.11	1791.63	1042.47	975.805	1073.07		0.864511	1.03888	1.09661	0.660863	0.603705	0.608234	0.73465	0.81162	0.54122	0.495521	0.590587	0.713899	0.744448	0.433161	0.405461	0.445876		+	2.41569	0.00126895	-0.673666	+	1.74672	0.00169715	-0.51316	+
43	O14734	ACOT8	Acyl-coenzyme A thioesterase 8 OS=Homo sapiens OX=9606 GN=ACOT8 PE=1 SV=1	2			198.952	236.757	231.275	122.802	127.83	130.473	175.412	159.122	94.4178	99.68	112.871	179.743	180.465	87.1072	89.4967	91.3825		0.894858	1.0649	1.04024	0.552346	0.574961	0.586849	0.788978	0.715708	0.424678	0.448347	0.507678	0.808459	0.811706	0.391796	0.402544	0.411026		+	3.20183	0.000488688	-0.803708	+	2.10819	0.000448522	-0.71138	+
44	Q9Y305	ACOT9	Acyl-coenzyme A thioesterase 9, mitochondrial OS=Homo sapiens OX=9606 GN=ACOT9 PE=1 SV=2	2			334.037	475.628	495.811	335.84	319.286	304.918	311.684	357.559	282.124	230.267	271.51	420.541	415.626	307.544	289.206	314.734		0.767621	1.093	1.13938	0.771764	0.733723	0.700705	0.716254	0.821675	0.648324	0.529156	0.623933	0.966408	0.955114	0.70674	0.664599	0.723263			1.0733	0.0559975	-0.422862		1.09851	0.0128236	-0.358919	+
45	Q15067	ACOX1	Peroxisomal acyl-coenzyme A oxidase 1 OS=Homo sapiens OX=9606 GN=ACOX1 PE=1 SV=3	1			392.75	460.283	445.204	310.876	330.581	255.594	285.474	304.867	196.362	173.975	198.971	351.079	348.574	217.785	212.883	215.073		0.907577	1.06363	1.02879	0.71838	0.763915	0.590633	0.659681	0.704495	0.453758	0.402026	0.459787	0.811283	0.805494	0.503263	0.491936	0.496996		+	1.82268	0.00617514	-0.538467	+	2.28209	0.00113201	-0.639118	+
46	P24666	ACP1	Low molecular weight phosphotyrosine protein phosphatase OS=Homo sapiens OX=9606 GN=ACP1 PE=1 SV=3	9			2075.74	2535.98	2461.62	972.983	825.95	948.691	997.98	1137.43	475.031	409.416	550.175	998.609	1064.67	401.809	362.26	381.328		0.880379	1.07558	1.04404	0.412669	0.350308	0.402366	0.423271	0.482416	0.201474	0.173645	0.233345	0.423538	0.451556	0.170418	0.153645	0.161732		+	3.51924	0	-1.36238	+	2.17074	0	-1.1662	+
47	Q4G176	ACSF3	Acyl-CoA synthetase family member 3, mitochondrial OS=Homo sapiens OX=9606 GN=ACSF3 PE=1 SV=3	1			279.359	381.171	399.844	243.635	217.604	225.267	230.803	277.464	172.61	162.801	179.59	240.668	250.137	175.691	155.58	170.311		0.79036	1.07841	1.13123	0.68929	0.615643	0.637323	0.652986	0.784999	0.488347	0.460595	0.508094	0.680896	0.707685	0.497063	0.440165	0.481842		+	1.64799	0.00344211	-0.611311	+	1.81132	0.00116849	-0.561037	+
48	P33121	ACSL1	Long-chain-fatty-acid--CoA ligase 1 OS=Homo sapiens OX=9606 GN=ACSL1 PE=1 SV=1	3			488.988	600.936	657.909	391.96	371.362	376.557	381.254	446.495	286.727	266.77	337.554	384.004	411.464	234.954	219.482	268.395		0.839304	1.03145	1.12924	0.672765	0.63741	0.646327	0.654389	0.766369	0.492141	0.457887	0.579381	0.659109	0.706241	0.403278	0.376721	0.460676		+	2.03316	0.00284947	-0.606166	+	1.27497	0.00326601	-0.481234	+
49	O95573	ACSL3	Long-chain-fatty-acid--CoA ligase 3 OS=Homo sapiens OX=9606 GN=ACSL3 PE=1 SV=3	12			1772.84	2120.81	2310.82	1468.85	1372.95	1424.42	1294.15	1437.95	990.13	943.611	1180.61	1399.62	1517.65	785.15	882.271	991.207		0.857208	1.02546	1.11733	0.710222	0.663852	0.688739	0.62575	0.695281	0.47875	0.456257	0.570851	0.676748	0.733818	0.379638	0.426598	0.479271		+	1.99353	0.00609674	-0.532247	+	1.19898	0.00743728	-0.400847	+
50	O60488	ACSL4	Long-chain-fatty-acid--CoA ligase 4 OS=Homo sapiens OX=9606 GN=ACSL4 PE=1 SV=2	10			3859.45	4698.85	4582.64	2955.3	2581.6	2779.36	2201.74	2523.62	1498.54	1432.41	1760.18	2415.37	2501.23	1287.87	1310.44	1412.07		0.88109	1.07272	1.04619	0.674678	0.589364	0.634512	0.502644	0.576128	0.342108	0.327011	0.401839	0.551415	0.571016	0.294013	0.299166	0.322367		+	2.4692	0.00151637	-0.656853	+	1.64716	0.00106849	-0.597828	+
51	Q9ULC5	ACSL5	Long-chain-fatty-acid--CoA ligase 5 OS=Homo sapiens OX=9606 GN=ACSL5 PE=1 SV=1	10			2322.79	2827.76	3031.52	1844.59	1740.43	1855.82	967.189	1065.1	711.222	632.154	813.644	984.041	1040.77	539.426	585.311	616.188		0.851663	1.03681	1.11152	0.676329	0.638138	0.680446	0.354625	0.390525	0.260773	0.231783	0.298327	0.360804	0.381604	0.197783	0.214607	0.225929		+	2.09004	0.00364969	-0.580253	+	1.39557	0.00234825	-0.505033	+
52	P68133	ACTA1	Actin, alpha skeletal muscle OS=Homo sapiens OX=9606 GN=ACTA1 PE=1 SV=1	20			3370.38	4369.04	4530.43	3216.16	3213.19	3337.82	2225.39	2319.54	2088.75	2261.57	2683.97	3016.87	3207.87	2439.18	2561.25	2920.07		0.824064	1.06824	1.1077	0.786357	0.785631	0.816103	0.544112	0.567132	0.510703	0.552958	0.656235	0.73763	0.78433	0.596384	0.62623	0.713962			1.10007	0.202438	-0.317208		0.0938715	0.818643	0.0374959
53	P63261	ACTG1	Actin, cytoplasmic 2 OS=Homo sapiens OX=9606 GN=ACTG1 PE=1 SV=1	13			1805.65	2318.87	2419.91	1675.12	1702.96	1707.9	1228.8	1338.88	1130.02	1200.41	1360.01	1721.76	1774.06	1322.49	1352.14	1605.04		0.827719	1.06298	1.1093	0.767884	0.780646	0.78291	0.563288	0.613749	0.518007	0.550274	0.623436	0.789264	0.813238	0.606236	0.619828	0.735758			1.2518	0.128012	-0.35212		0.21969	0.674282	-0.0646407
54	O96019	ACTL6A	Actin-like protein 6A OS=Homo sapiens OX=9606 GN=ACTL6A PE=1 SV=1	8			3397.46	4124.75	3868.88	2165.81	1983.82	2137.61	2602.55	2761.48	1412.74	1285.87	1437.87	2790.73	2720.19	1081.55	1148.55	1201.59		0.894768	1.08631	1.01892	0.570396	0.522466	0.562969	0.685417	0.727274	0.372064	0.338652	0.378683	0.734977	0.716399	0.284841	0.302486	0.316455		+	3.13816	0.000173585	-0.853831	+	3.0409	0	-0.960959	+
55	P12814	ACTN1	Alpha-actinin-1 OS=Homo sapiens OX=9606 GN=ACTN1 PE=1 SV=2	12			1458.39	1865.88	1922.03	1343.32	1207.88	1189.32	1536.16	1583.18	1262.32	1130.35	1282.76	1878.12	1853.59	1377.41	1391.02	1454.34		0.833953	1.06697	1.09908	0.768153	0.690704	0.680091	0.878425	0.905312	0.721834	0.64637	0.733523	1.07397	1.05994	0.787647	0.795429	0.831638			1.59607	0.0153738	-0.479482		1.71985	0.0102441	-0.350377	+
56	O43707	ACTN4	Alpha-actinin-4 OS=Homo sapiens OX=9606 GN=ACTN4 PE=1 SV=2	17			3675.18	4614.55	4690.32	3917.91	3343.37	3623.18	4707.39	4412.58	4355.62	4157.36	4897.48	5402.08	5202.78	4434.81	4668.71	5772.95		0.849422	1.06653	1.08405	0.905523	0.772733	0.837404	1.08799	1.01985	1.00669	0.960865	1.13192	1.24855	1.20249	1.02499	1.07905	1.33427			0.880374	0.348178	-0.248349		0.114749	0.841848	-0.0314131
57	Q9NZ32	ACTR10	Actin-related protein 10 OS=Homo sapiens OX=9606 GN=ACTR10 PE=1 SV=1	3			399.854	485.004	561.993	307.307	284.628	275.257	258.708	309.096	207.592	195.977	240.487	288.36	287.28	169.725	162.687	209.94		0.829085	1.00564	1.16527	0.637191	0.590167	0.570737	0.536423	0.640901	0.430435	0.406352	0.498642	0.597905	0.595666	0.351919	0.337326	0.435304		+	2.07845	0.000628437	-0.726161	+	1.1372	0.00746906	-0.402892	+
58	P61163	ACTR1A	Alpha-centractin OS=Homo sapiens OX=9606 GN=ACTR1A PE=1 SV=1	9			1044.27	1260.51	1302.72	823.866	757.665	709.736	600.726	742.238	542.358	482.842	606.983	698.997	755.848	477.757	436.469	533.897		0.868416	1.04824	1.08334	0.685128	0.630075	0.590217	0.499564	0.617246	0.451025	0.401532	0.504768	0.581286	0.628564	0.397303	0.362968	0.443989		+	2.28766	0.00153373	-0.650854		0.770971	0.0413214	-0.30181	+
59	P42025	ACTR1B	Beta-centractin OS=Homo sapiens OX=9606 GN=ACTR1B PE=1 SV=1	1			83.8428	102.913	122.692	68.351	62.3937	64.047	53.0663	61.2605	50.4371	42.689	63.2774	69.4632	68.1389	42.2142	44.0555	55.4093		0.81283	0.997709	1.18946	0.662642	0.604887	0.620916	0.514461	0.593901	0.488972	0.413857	0.613455	0.673424	0.660585	0.409254	0.427104	0.537176		+	1.78713	0.00196845	-0.651505		0.252389	0.369105	-0.14803	+
60	P61160	ACTR2	Actin-related protein 2 OS=Homo sapiens OX=9606 GN=ACTR2 PE=1 SV=1	2			440.703	519.255	574.972	334.009	321.224	329.683	327.695	331.58	211.563	209.988	278.153	359.726	347.24	223.2	242.449	245.222		0.861348	1.01488	1.12378	0.652816	0.627828	0.644361	0.640475	0.648069	0.413497	0.410419	0.543646	0.70308	0.678676	0.436241	0.473863	0.479283		+	2.29932	0.00175834	-0.631732	+	1.22827	0.00267016	-0.511764	+
61	P61158	ACTR3	Actin-related protein 3 OS=Homo sapiens OX=9606 GN=ACTR3 PE=1 SV=3	8			1524.85	1899.95	1986.22	1253.67	1103.49	1104.83	1175.05	1246.84	879.548	862.789	1032.57	1023.57	1083.58	617.627	658.36	710.715		0.845414	1.05338	1.10121	0.695065	0.611801	0.612544	0.651476	0.691278	0.487643	0.478351	0.572482	0.567492	0.600763	0.342427	0.365011	0.394038		+	2.06353	0.00194023	-0.637533	+	1.41814	0.00730986	-0.392781	+
62	Q9H981	ACTR8	Actin-related protein 8 OS=Homo sapiens OX=9606 GN=ACTR8 PE=1 SV=2	2			697.828	906.936	887.208	462.935	429.247	448.857	594.684	560.954	294.309	284.984	343.57	512.092	481.67	191.221	214.638	205.194		0.840091	1.09183	1.06808	0.557312	0.516756	0.540364	0.71592	0.675313	0.354309	0.343083	0.413612	0.61649	0.579866	0.230204	0.258395	0.247026		+	2.67502	0.000177606	-0.884757	+	2.41467	0.000239382	-0.913731	+
63	O14672	ADAM10	Disintegrin and metalloproteinase domain-containing protein 10 OS=Homo sapiens OX=9606 GN=ADAM10 PE=1 SV=1	2			149.439	209.013	198.914	164.523	143.695	176.389	147.817	147.942	104.068	81.7519	117.663	178.927	168.738	104.031	123.607	125.563		0.804349	1.125	1.07065	0.885538	0.773433	0.949407	0.795619	0.796292	0.560142	0.440026	0.633316	0.963067	0.908225	0.559943	0.66531	0.675838			0.478267	0.469855	-0.191745	+	1.17948	0.00159801	-0.563918	+
64	P78536	ADAM17	Disintegrin and metalloproteinase domain-containing protein 17 OS=Homo sapiens OX=9606 GN=ADAM17 PE=1 SV=1	1			248.075	329.235	355.08	250.069	258.037	279.782	197.681	260.009	173.618	158.123	197.277	433.326	485.094	396.157	393.192	376.443		0.798191	1.05933	1.14248	0.804606	0.830244	0.900209	0.636046	0.836589	0.558622	0.508767	0.634746	1.39424	1.56081	1.27465	1.26511	1.21122			0.622424	0.396907	-0.227944		0.831732	0.014138	-0.368472
65	Q13443	ADAM9	Disintegrin and metalloproteinase domain-containing protein 9 OS=Homo sapiens OX=9606 GN=ADAM9 PE=1 SV=1	1			137.844	178.81	177.94	145.509	118.511	127.085	126.514	117.276	91.8173	71.1561	85.0765	186.252	167.859	81.491	114.758	116.28		0.836104	1.08459	1.07931	0.882597	0.718838	0.770844	0.767381	0.711347	0.556925	0.431603	0.516038	1.12973	1.01816	0.49429	0.696074	0.705306			1.03491	0.176632	-0.333644	+	1.51554	0.00128619	-0.567026	+
66	P55265	ADAR	Double-stranded RNA-specific adenosine deaminase OS=Homo sapiens OX=9606 GN=ADAR PE=1 SV=4	14			2437.76	3071.11	3193.81	1715.71	1518.39	1593.66	2134.78	2098.79	1106.86	1046.91	1218.33	2098.8	2018.57	882.726	936.487	929.771		0.840348	1.05868	1.10097	0.591442	0.523422	0.549369	0.735904	0.723498	0.381558	0.360892	0.419984	0.723501	0.695844	0.304295	0.322827	0.320512		+	2.5094	0.000492401	-0.841968	+	2.79784	0.000260504	-0.915984	+
67	P35611	ADD1	Alpha-adducin OS=Homo sapiens OX=9606 GN=ADD1 PE=1 SV=2	1			324.905	380.755	379.997	235.478	193.096	178.85	315.088	327.151	201.388	185.431	196.194	370.216	349.891	201.105	201.003	222.294		0.897811	1.05214	1.05005	0.650697	0.533583	0.494217	0.870684	0.904018	0.556496	0.512402	0.542144	1.02302	0.966855	0.555714	0.555432	0.614266		+	2.41277	0.000477172	-0.843736	+	3.15699	0.000547945	-0.725142	+
68	Q9UEY8	ADD3	Gamma-adducin OS=Homo sapiens OX=9606 GN=ADD3 PE=1 SV=1	2			60.4995	78.4333	87.4836	54.4177	49.1191	46.5321	74.9249	87.8813	58.884	52.2173	46.0038	99.8975	92.0247	59.4204	63.9044	67.9936		0.801614	1.03924	1.15915	0.72103	0.650824	0.616547	0.992749	1.16442	0.780209	0.691875	0.609547	1.32363	1.21932	0.787316	0.846728	0.90091		+	1.55893	0.0048142	-0.579605	+	1.56525	0.00108199	-0.639115	+
69	Q86SQ4	ADGRG6	Adhesion G-protein coupled receptor G6 OS=Homo sapiens OX=9606 GN=ADGRG6 PE=1 SV=3	3			420.638	512.112	561.299	419.242	374.59	389.093	491.019	551.635	437.657	385.21	422.661	799.405	899.878	787.802	779.883	684.746		0.844627	1.0283	1.12707	0.841824	0.752164	0.781286	0.98595	1.10766	0.8788	0.773489	0.848689	1.60518	1.80692	1.58188	1.56598	1.37495			1.17156	0.176069	-0.328199		1.39357	0.017915	-0.328097
70	P11766	ADH5	Alcohol dehydrogenase class-3 OS=Homo sapiens OX=9606 GN=ADH5 PE=1 SV=4	6			1612.89	1885.39	1870.06	1319.1	1225.4	1170.42	994.649	1123.27	830.364	725.868	816.226	1389.93	1389.22	1003.25	913.914	1055.85		0.901334	1.05362	1.04505	0.737155	0.684793	0.654068	0.555842	0.627719	0.464034	0.405638	0.456133	0.776737	0.776341	0.560648	0.510724	0.590043		+	2.40066	0.00539693	-0.529254	+	1.58512	0.00458529	-0.421104	+
71	Q96A54	ADIPOR1	Adiponectin receptor protein 1 OS=Homo sapiens OX=9606 GN=ADIPOR1 PE=1 SV=1	1			132.832	174.073	173.205	129.876	123.263	119.34	182.292	245.453	189.853	171.702	172.485	375.657	499.153	378.858	376.572	329.35		0.83001	1.08771	1.08228	0.811539	0.770217	0.745704	1.13906	1.53373	1.18631	1.07289	1.07778	2.34732	3.11899	2.36732	2.35304	2.05797			1.25016	0.122012	-0.355941		0.620326	0.100927	-0.250429
72	Q9H2P0	ADNP	Activity-dependent neuroprotector homeobox protein OS=Homo sapiens OX=9606 GN=ADNP PE=1 SV=1	12			3054.35	3796.35	3940.5	2268.32	2009.47	2064.91	1972.42	2292.94	1428.84	1340.36	1608.98	1667.42	1763.91	1003.28	920.536	1070.06		0.849122	1.0554	1.09548	0.630603	0.558641	0.574054	0.548341	0.637447	0.397224	0.372626	0.447303	0.46355	0.490375	0.278916	0.255913	0.297481		+	2.41577	0.000631148	-0.75978	+	1.62559	0.00141451	-0.547379	+
73	Q6IQ32	ADNP2	Activity-dependent neuroprotector homeobox protein 2 OS=Homo sapiens OX=9606 GN=ADNP2 PE=1 SV=1	3			1230.25	1644.1	1541.6	911.474	859.784	917.324	583.928	629.157	382.146	341.472	412.399	694.089	554.284	304.063	314.466	303.811		0.835777	1.11693	1.04729	0.619215	0.584099	0.623189	0.396695	0.427421	0.259613	0.231981	0.280166	0.471533	0.376556	0.206567	0.213634	0.206396		+	2.24945	0.000766214	-0.705618	+	2.07812	0.000582418	-0.682961	+
74	Q16186	ADRM1	Proteasomal ubiquitin receptor ADRM1 OS=Homo sapiens OX=9606 GN=ADRM1 PE=1 SV=2	1			73.6079	91.4403	110.273	49.0369	60.4318	51.0919	45.4175	56.5428	38.5599	33.2694	37.6288	57.9502	48.6224	38.237	33.2807	43.4249		0.802058	0.996367	1.20157	0.534324	0.658487	0.556716	0.494886	0.616111	0.420163	0.362515	0.410017	0.631446	0.529807	0.416644	0.362639	0.473174		+	1.78518	0.000594458	-0.764476	+	1.33401	0.00332376	-0.476918	+
75	P30566	ADSL	Adenylosuccinate lyase OS=Homo sapiens OX=9606 GN=ADSL PE=1 SV=2	9			2176.87	2603.77	2789.85	1709.99	1532.91	1537.5	1070.51	1305.92	890.27	847.298	1040.53	988.734	1105.04	609.459	663.087	738.631		0.86264	1.03181	1.10555	0.677627	0.607455	0.609274	0.424217	0.517504	0.352792	0.335763	0.412337	0.391811	0.4379	0.241514	0.262765	0.292701		+	2.2856	0.00152161	-0.657399		0.970176	0.0141887	-0.358157	+
76	P30520	ADSS	Adenylosuccinate synthetase isozyme 2 OS=Homo sapiens OX=9606 GN=ADSS PE=1 SV=3	9			1382.73	1754.51	1828.06	1068.21	971.479	998.603	747.135	863.024	525.479	513.022	631.074	744.002	749.428	414.818	431.546	464.382		0.835436	1.06006	1.1045	0.645405	0.586961	0.603349	0.451414	0.521433	0.317491	0.309964	0.381291	0.449521	0.452799	0.25063	0.260737	0.280576		+	2.21478	0.000913545	-0.699156	+	1.46701	0.00157915	-0.535231	+
77	Q8N142	ADSSL1	Adenylosuccinate synthetase isozyme 1 OS=Homo sapiens OX=9606 GN=ADSSL1 PE=1 SV=1	3			299.808	369.872	399.874	229.679	210.001	227.681	162.763	212.153	129.984	121.299	160.904	163.789	172.463	97.8282	96.2243	116.675		0.840934	1.03746	1.12161	0.644228	0.589033	0.638624	0.456535	0.59507	0.364593	0.340232	0.451321	0.459413	0.483743	0.274399	0.2699	0.327263		+	2.16646	0.00156838	-0.671194	+	0.895464	0.00562025	-0.446238	+
78	P55196	AFDN	Afadin OS=Homo sapiens OX=9606 GN=AFDN PE=1 SV=3	2			311.362	356.066	356.524	211.932	183.475	187.979	260.798	254.016	152.72	132.837	160.294	244.461	255.452	125.146	142.446	147.44		0.912236	1.04321	1.04455	0.620924	0.53755	0.550746	0.764092	0.744222	0.447443	0.389189	0.469633	0.716228	0.74843	0.366656	0.417342	0.431973		+	3.053	0.000491654	-0.81166	+	2.31345	0.000173427	-0.796837	+
79	Q9Y4W6	AFG3L2	AFG3-like protein 2 OS=Homo sapiens OX=9606 GN=AFG3L2 PE=1 SV=2	7			1433.76	1930.76	1938.46	1319.78	1245.64	1325.12	972.813	1038.01	756.982	671.906	804.642	789.801	854.238	380.165	490.223	565.122		0.811106	1.09227	1.09662	0.746625	0.704683	0.749646	0.550339	0.587223	0.42824	0.38011	0.455202	0.446806	0.483259	0.215067	0.277329	0.319701			1.3772	0.0357208	-0.433525	+	1.60172	0.00383051	-0.436667	+
80	P02771	AFP	Alpha-fetoprotein OS=Homo sapiens OX=9606 GN=AFP PE=1 SV=1	1			99.0861	109.215	103.447	67.4821	68.0464	65.9703	114.169	76.9906	73.4258	69.3599	63.8629	83.4767	88.6386	60.3177	67.0405	54.5072		0.953521	1.05099	0.995486	0.649391	0.654821	0.634842	1.09867	0.740892	0.706588	0.667461	0.614563	0.803309	0.852983	0.580447	0.645141	0.524531		+	3.90431	0.00131918	-0.628587	+	0.851026	0.00583321	-0.447102	+
81	Q6ULP2	AFTPH	Aftiphilin OS=Homo sapiens OX=9606 GN=AFTPH PE=1 SV=3	1			145.05	203.651	214.949	129.13	124.504	130.918	95.5686	122.49	96.1435	76.5303	100.735	114.719	133.35	72.6475	77.8966	92.8832		0.772022	1.08392	1.14406	0.687288	0.662667	0.696805	0.508659	0.651947	0.511719	0.407329	0.536157	0.610586	0.709749	0.386663	0.414601	0.494366		+	1.38482	0.00956172	-0.530988		0.520809	0.101491	-0.25766	+
82	Q96P47	AGAP3	Arf-GAP with GTPase, ANK repeat and PH domain-containing protein 3 OS=Homo sapiens OX=9606 GN=AGAP3 PE=1 SV=2	2			246.873	313.496	346.775	221.219	188.483	191.199	162.635	184.407	136.612	119.437	130.357	143.879	152.693	91.0469	102.249	92.0094		0.816429	1.03676	1.14681	0.731589	0.623329	0.632311	0.537847	0.609849	0.451787	0.394988	0.431101	0.47582	0.504968	0.3011	0.338146	0.304283		+	1.63539	0.00442212	-0.583744	+	1.63729	0.00411268	-0.429332	+
83	P52594	AGFG1	Arf-GAP domain and FG repeat-containing protein 1 OS=Homo sapiens OX=9606 GN=AGFG1 PE=1 SV=2	4			733.166	880.308	882.055	501.335	438.892	451.783	535.419	624.349	384.901	367.348	440.54	565.054	634.898	365.045	328.914	363.463		0.881375	1.05826	1.06036	0.60268	0.527614	0.543111	0.643654	0.750561	0.462709	0.441607	0.529595	0.67928	0.763243	0.438839	0.395404	0.436937		+	2.86246	0.0003367	-0.839249	+	1.59798	0.00148667	-0.544541	+
84	O95081	AGFG2	Arf-GAP domain and FG repeat-containing protein 2 OS=Homo sapiens OX=9606 GN=AGFG2 PE=1 SV=2	1			80.6157	87.0738	106.578	62.7466	54.6216	57.2577	62.5041	63.6913	44.7224	38.3723	47.9362	65.8241	62.2925	31.7479	27.4186	34.7365		0.881793	0.952433	1.16577	0.686337	0.597463	0.626298	0.683684	0.69667	0.489184	0.419725	0.524337	0.719999	0.681369	0.347266	0.299911	0.379956		+	2.06744	0.0017593	-0.643553	+	1.65415	0.00154985	-0.536797	+
85	Q53H12	AGK	Acylglycerol kinase, mitochondrial OS=Homo sapiens OX=9606 GN=AGK PE=1 SV=2	6			1726.56	2143.04	2287.01	1393.68	1255.65	1440.67	1578.75	1855.04	1270.16	1210.1	1481.35	830.274	970.887	502.466	553.303	688.424		0.84132	1.04426	1.11442	0.679114	0.611855	0.702011	0.769295	0.903926	0.618925	0.589659	0.721834	0.404577	0.473095	0.244842	0.269614	0.335456		+	1.8878	0.00393368	-0.582316	+	1.11566	0.00916756	-0.379433	+
86	P35573	AGL	Glycogen debranching enzyme OS=Homo sapiens OX=9606 GN=AGL PE=1 SV=3	9			1832.37	2238.84	2231.35	1351.75	1237.07	1253.51	1318.93	1463.98	933.473	850.467	1011.47	1508.88	1499.5	783.787	824.755	870.25		0.872203	1.06568	1.06212	0.643429	0.588842	0.596667	0.627807	0.69685	0.44433	0.40482	0.481457	0.718222	0.713758	0.37308	0.392581	0.414236		+	2.62333	0.000598985	-0.708883	+	1.88892	0.00105535	-0.580145	+
87	Q9UL18	AGO1	Protein argonaute-1 OS=Homo sapiens OX=9606 GN=AGO1 PE=1 SV=3	3			224.551	276.892	292.458	164.983	146.521	142.247	150.903	164.206	93.7473	90.566	93.9314	186.813	183.969	89.8029	75.0203	95.6011		0.848535	1.04632	1.10514	0.623439	0.553675	0.537524	0.570234	0.620503	0.354253	0.342232	0.354949	0.705931	0.695184	0.339348	0.283487	0.361258		+	2.41322	0.0004	-0.800924	+	3.20165	0.000179971	-0.763374	+
88	Q9UKV8	AGO2	Protein argonaute-2 OS=Homo sapiens OX=9606 GN=AGO2 PE=1 SV=3	7			1487.57	1872.5	1898.24	1020.53	927.481	965.425	1072.27	1224.1	711.938	606.792	663.107	1257.89	1294.53	598.479	554.354	570.644		0.848697	1.06831	1.08299	0.582238	0.529152	0.5508	0.611757	0.69838	0.406179	0.34619	0.378319	0.717658	0.738562	0.341448	0.316273	0.325567		+	2.65513	0.0005209	-0.844214	+	2.24698	0.000170799	-0.797391	+
89	Q9H9G7	AGO3	Protein argonaute-3 OS=Homo sapiens OX=9606 GN=AGO3 PE=1 SV=2	7			1187.17	1472.69	1518.9	822.733	711.952	778.16	1031.37	1195.55	672.701	610.019	668.923	1286.91	1322.59	671.466	606.253	621.84		0.852289	1.05727	1.09044	0.590653	0.511122	0.558654	0.740437	0.858305	0.482943	0.437943	0.480231	0.923894	0.949509	0.482056	0.435239	0.446429		+	2.57833	0.0005184	-0.847507	+	2.35931	0.000386423	-0.772826	+
90	O15120	AGPAT2	1-acyl-sn-glycerol-3-phosphate acyltransferase beta OS=Homo sapiens OX=9606 GN=AGPAT2 PE=1 SV=1	1			41.0077	46.3243	52.9827	33.0502	35.0829	39.9993	38.8359	45.1983	27.7448	27.6678	39.1991	37.5048	43.114	20.2898	26.1926	29.3347		0.876766	0.990437	1.1328	0.70663	0.75009	0.855205	0.830331	0.966363	0.593198	0.591552	0.838097	0.801872	0.921799	0.433806	0.560011	0.627191			1.30114	0.0962222	-0.372595	+	0.798737	0.00757793	-0.429748	+
91	Q9NUQ2	AGPAT5	1-acyl-sn-glycerol-3-phosphate acyltransferase epsilon OS=Homo sapiens OX=9606 GN=AGPAT5 PE=1 SV=3	1			31.1447	49.8931	46.3554	24.5535	20.7972	21.0161	37.6685	34.1011	20.0764	17.1046	22.8619	26.1042	29.4525	15.7781	16.287	14.5223		0.733431	1.17494	1.09163	0.578214	0.489756	0.494911	0.887061	0.803051	0.472782	0.402799	0.538378	0.614731	0.693581	0.371561	0.383545	0.341988		+	1.81773	0.000503106	-0.915584	+	1.84797	0.000180758	-0.850645	+
92	O00116	AGPS	Alkyldihydroxyacetonephosphate synthase, peroxisomal OS=Homo sapiens OX=9606 GN=AGPS PE=1 SV=1	6			846.246	1002.24	1181.02	661.738	593.716	594.375	596.528	652.031	482.581	409.378	495.512	563.745	610.783	288.61	288.014	361.581		0.838004	0.992479	1.16952	0.655293	0.587933	0.588586	0.590718	0.645681	0.477881	0.405391	0.490686	0.558254	0.604834	0.285799	0.285209	0.358059		+	2.03912	0.0010954	-0.700263	+	1.43568	0.00409863	-0.43639	+
93	Q8WYP5	AHCTF1	Protein ELYS OS=Homo sapiens OX=9606 GN=AHCTF1 PE=1 SV=3	7			1044.2	1409	1511.63	731.615	660.314	733.974	719.478	886.385	459.046	438.048	457.473	758.838	842.545	363.265	401.788	456.962		0.790097	1.06612	1.14378	0.553579	0.499628	0.555364	0.544395	0.670686	0.347338	0.33145	0.346148	0.574177	0.637514	0.274866	0.304014	0.345762		+	2.17394	0.000522581	-0.882998	+	2.24354	0.000185351	-0.822971	+
94	P23526	AHCY	Adenosylhomocysteinase OS=Homo sapiens OX=9606 GN=AHCY PE=1 SV=4	10			1935.55	2621.79	2547.24	1809.46	1663.72	1605.82	1208.77	1254.76	966.698	877.119	947.812	1482.61	1443.87	1088.93	1023.18	987.119		0.817311	1.10708	1.0756	0.764068	0.702527	0.678078	0.510419	0.529838	0.408201	0.370375	0.400226	0.626051	0.609693	0.459815	0.432051	0.416824			1.47595	0.0182633	-0.472983	+	2.20441	0.00443928	-0.405591	+
95	O43865	AHCYL1	S-adenosylhomocysteine hydrolase-like protein 1 OS=Homo sapiens OX=9606 GN=AHCYL1 PE=1 SV=2	5			383.692	466.856	496.427	305.27	256.276	251.351	395.969	433.518	287.59	281.81	307.545	381.692	403.334	225.932	220.212	232.932		0.854564	1.03979	1.10565	0.679901	0.570781	0.559812	0.881907	0.965537	0.640524	0.627651	0.684968	0.850109	0.898311	0.503199	0.490459	0.518789		+	2.14603	0.000569132	-0.725673	+	2.27245	0.0016068	-0.504228	+
96	Q5TGY3	AHDC1	AT-hook DNA-binding motif-containing protein 1 OS=Homo sapiens OX=9606 GN=AHDC1 PE=1 SV=1	4			840.198	1062.19	1133.65	602.577	539.396	564.13	898.578	893.891	416.779	411.899	441.344	976.555	886.429	372.921	387.869	365.978		0.830225	1.04958	1.12019	0.595424	0.532993	0.557434	0.887912	0.88328	0.411832	0.40701	0.436105	0.964963	0.875907	0.368494	0.383265	0.361634		+	2.38434	0.000433735	-0.821362	+	3.96194	0	-1.08271	+
97	Q09666	AHNAK	Neuroblast differentiation-associated protein AHNAK OS=Homo sapiens OX=9606 GN=AHNAK PE=1 SV=2	15			3750.54	4746.87	4923.03	3698.92	3493.05	3637.96	2791.6	3341.91	2755.83	2393.47	2611.61	4235.45	4140.65	3407.81	3183.27	3877.19		0.838394	1.06111	1.10049	0.826855	0.780835	0.813228	0.624033	0.747049	0.616037	0.535035	0.583798	0.946791	0.925599	0.761781	0.711587	0.866706			1.12353	0.236364	-0.299633		0.84011	0.0980648	-0.242039
98	P35869	AHR	Aryl hydrocarbon receptor OS=Homo sapiens OX=9606 GN=AHR PE=1 SV=2	3			1444.61	1860.6	1849.78	1130.31	998.788	1072.34	835.535	908.45	502.872	482.205	590.515	1080.83	1061.4	523.129	519.648	543.789		0.840706	1.0828	1.0765	0.657796	0.581255	0.624059	0.486248	0.528682	0.292652	0.280624	0.343656	0.629	0.617693	0.30444	0.302415	0.316464		+	2.1823	0.0013831	-0.679357	+	2.02425	0.000477742	-0.735783	+
99	O95433	AHSA1	Activator of 90 kDa heat shock protein ATPase homolog 1 OS=Homo sapiens OX=9606 GN=AHSA1 PE=1 SV=1	11			3078.66	4001.98	4287.62	2694.43	2308.62	2364.54	1463.79	1670.22	1075.44	964.73	1168.12	1689.89	1756.81	1035.33	976.32	1126.44		0.812436	1.05609	1.13147	0.71104	0.609228	0.623985	0.386283	0.440759	0.283801	0.254585	0.308258	0.44595	0.463609	0.273216	0.257644	0.297259		+	1.72407	0.0031903	-0.614874	+	1.66553	0.0013587	-0.552436	+
100	O95831	AIFM1	Apoptosis-inducing factor 1, mitochondrial OS=Homo sapiens OX=9606 GN=AIFM1 PE=1 SV=1	11			3224.72	4094.77	4276.3	2662.22	2376.03	2468.03	1849.3	2195.18	1415.48	1305.25	1580.81	2187.59	2267.44	1209.17	1324.88	1385.81		0.834282	1.05938	1.10634	0.688755	0.614714	0.638515	0.478441	0.567925	0.366205	0.337687	0.408979	0.565961	0.58662	0.31283	0.342766	0.358529		+	1.98678	0.00242162	-0.618259	+	1.42697	0.00265624	-0.495232	+
101	Q9BRQ8	AIFM2	Apoptosis-inducing factor 2 OS=Homo sapiens OX=9606 GN=AIFM2 PE=1 SV=1	4			618.854	883.996	832.559	507.995	481.028	480.888	617.176	644.772	433.461	373.869	473.93	667.194	701.121	411.023	410.167	442.466		0.794962	1.13556	1.06948	0.652556	0.617915	0.617735	0.792807	0.828256	0.556812	0.480261	0.608797	0.857058	0.90064	0.527988	0.526889	0.568379		+	1.80739	0.00198095	-0.651518	+	1.64898	0.00116181	-0.569532	+
102	Q12904	AIMP1	Aminoacyl tRNA synthase complex-interacting multifunctional protein 1 OS=Homo sapiens OX=9606 GN=AIMP1 PE=1 SV=2	9			813.119	1023.06	1069.19	686.016	684.346	741.445	450.79	536.283	414.483	368.667	510.83	564.378	567.975	365.601	329.443	466.796		0.839603	1.05638	1.10401	0.70836	0.706636	0.765595	0.465473	0.55375	0.427983	0.380675	0.527468	0.58276	0.586475	0.377509	0.340173	0.482			1.61143	0.0221679	-0.451141		0.411332	0.204347	-0.202234	+
103	Q13155	AIMP2	Aminoacyl tRNA synthase complex-interacting multifunctional protein 2 OS=Homo sapiens OX=9606 GN=AIMP2 PE=1 SV=2	2			179.296	209.289	233.599	152.098	138.952	139.805	86.2955	97.3593	69.3861	64.8014	82.2607	97.4966	113.027	59.6694	66.8115	72.2664		0.864516	1.00913	1.12635	0.733375	0.669988	0.674101	0.416093	0.46944	0.334561	0.312455	0.396638	0.470102	0.544985	0.287709	0.322147	0.348449		+	1.93738	0.00708362	-0.522957		1.01689	0.0149092	-0.352677	+
104	O00170	AIP	AH receptor-interacting protein OS=Homo sapiens OX=9606 GN=AIP PE=1 SV=2	2			222.731	276.982	304.972	131.799	123.875	114.562	108.643	165.386	76.6502	63.0466	73.6782	156.718	155.545	63.496	65.7808	61.9259		0.830378	1.03264	1.13699	0.491369	0.461827	0.427106	0.405039	0.616587	0.285765	0.235048	0.274685	0.584271	0.579898	0.236724	0.245242	0.23087		+	2.79089	0	-1.11014	+	1.45035	0.000183432	-0.919329	+
105	Q96IF1	AJUBA	LIM domain-containing protein ajuba OS=Homo sapiens OX=9606 GN=AJUBA PE=1 SV=1	4			254.415	331.008	343.078	207.441	182.852	176.099	222.16	237.169	165.293	161.134	189.858	186.375	188.369	107.993	107.568	108.706		0.822019	1.06949	1.10849	0.670245	0.590797	0.568978	0.717802	0.766296	0.534064	0.520626	0.613434	0.60218	0.608623	0.348927	0.347554	0.351231		+	1.99353	0.00109993	-0.704274	+	1.59276	0.00474405	-0.419355	+
106	Q9Y3D8	AK6	Adenylate kinase isoenzyme 6 OS=Homo sapiens OX=9606 GN=AK6 PE=1 SV=1	4			658.14	770.945	800.484	415.793	386.063	361.098	462.195	504.221	291.056	254.085	312.893	413.026	416.663	174.999	172.797	190.034		0.885561	1.03735	1.07709	0.559471	0.519468	0.485876	0.621907	0.678455	0.391631	0.341884	0.421014	0.555748	0.560642	0.23547	0.232507	0.255701		+	3.06443	0.000238342	-0.936268	+	2.07046	0.000518257	-0.76052	+
107	Q5TCS8	AK9	Adenylate kinase 9 OS=Homo sapiens OX=9606 GN=AK9 PE=1 SV=2	1			333.278	413.161	444.746	236.408	267.492	207.194	152.162	181.904	106.932	98.143	118.611	239.926	263.479	129.969	119.572	116.945		0.839361	1.04055	1.12009	0.595394	0.673679	0.521818	0.38322	0.458125	0.269308	0.247173	0.298722	0.604254	0.663572	0.327327	0.301142	0.294526		+	1.9724	0.000576547	-0.741552	+	1.68625	0.00108123	-0.629096	+
108	Q92667	AKAP1	A-kinase anchor protein 1, mitochondrial OS=Homo sapiens OX=9606 GN=AKAP1 PE=1 SV=1	1			165.336	194.973	205.898	145.838	128.24	151.196	106.839	132.396	105.804	91.1321	106.966	98.8203	89.283	68.6753	69.0386	72.2922		0.876019	1.03305	1.09093	0.77271	0.679469	0.801099	0.566077	0.701489	0.560594	0.482856	0.56675	0.523591	0.473058	0.36387	0.365795	0.383034			1.579	0.0455142	-0.410324		0.667118	0.117244	-0.23529	+
109	Q9UKA4	AKAP11	A-kinase anchor protein 11 OS=Homo sapiens OX=9606 GN=AKAP11 PE=1 SV=1	2			569.05	721.311	833.83	523.098	462.769	477.948	324.298	366.392	258.889	248.951	309.469	382.827	392.697	231.076	249.217	267.055		0.803671	1.01871	1.17762	0.738773	0.65357	0.675007	0.458007	0.517456	0.36563	0.351594	0.437064	0.540667	0.554607	0.326349	0.35197	0.377162			1.43415	0.0103032	-0.521568		1.03971	0.016449	-0.346024	+
110	Q02952	AKAP12	A-kinase anchor protein 12 OS=Homo sapiens OX=9606 GN=AKAP12 PE=1 SV=4	12			1751.56	2204.21	2490.5	1683.71	1417.77	1487.9	873.626	1007.58	698.713	636.925	720.075	977.131	1047.25	685.575	693.353	811.6		0.81515	1.02581	1.15904	0.783574	0.659809	0.692447	0.406573	0.468913	0.325171	0.296416	0.335112	0.454743	0.487375	0.319057	0.322676	0.377707			1.34758	0.0185505	-0.478931	+	1.66743	0.00336124	-0.455262	+
111	O43823	AKAP8	A-kinase anchor protein 8 OS=Homo sapiens OX=9606 GN=AKAP8 PE=1 SV=1	6			1346.79	1781.1	1786.73	1259.01	1140.81	1292.13	1112.54	1180.3	958.186	973.053	980.633	919.988	979.647	547.38	575.366	614.373		0.822112	1.08723	1.09066	0.768529	0.696377	0.788747	0.679121	0.720483	0.584899	0.593975	0.598602	0.561582	0.598	0.334134	0.351217	0.375028			1.29367	0.0628889	-0.402505		2.22304	0.0721127	-0.239588	+
112	Q9ULX6	AKAP8L	A-kinase anchor protein 8-like OS=Homo sapiens OX=9606 GN=AKAP8L PE=1 SV=4	11			2211.77	2819.76	3016.28	1938.92	1810.34	1955.66	1527.48	1655.5	1215.78	1198.13	1360.87	1691.74	1747.67	1045.26	1039.32	1136.12		0.824486	1.05113	1.12439	0.722776	0.674844	0.729016	0.569402	0.617124	0.453209	0.44663	0.507295	0.630634	0.651483	0.389644	0.38743	0.423514			1.58515	0.0141379	-0.484792		1.53282	0.013441	-0.340145	+
113	Q99996	AKAP9	A-kinase anchor protein 9 OS=Homo sapiens OX=9606 GN=AKAP9 PE=1 SV=4	8			1198.17	1504.74	1717.65	1018.02	916.887	853.573	875.793	992.097	635.932	564.119	638.388	1159.83	1180	767.075	707.993	710.861		0.813135	1.02119	1.16568	0.690876	0.622243	0.579275	0.594354	0.673284	0.431573	0.382838	0.43324	0.787115	0.800804	0.520573	0.480477	0.482424		+	1.74455	0.00195305	-0.652872	+	2.03499	0.00108048	-0.607434	+
114	P14550	AKR1A1	Alcohol dehydrogenase [NADP(+)] OS=Homo sapiens OX=9606 GN=AKR1A1 PE=1 SV=3	3			392.892	457.043	568.163	291.928	284.879	243.352	242.706	305.305	168.753	142.259	177.043	307.521	358.947	192.813	209.603	215.005		0.831167	0.966879	1.20195	0.617577	0.602664	0.514814	0.513447	0.645876	0.356999	0.30095	0.374536	0.650564	0.759356	0.407898	0.443417	0.454845		+	1.94738	0.000675573	-0.77792	+	1.63231	0.000443548	-0.748886	+
115	O43488	AKR7A2	Aflatoxin B1 aldehyde reductase member 2 OS=Homo sapiens OX=9606 GN=AKR7A2 PE=1 SV=3	1			51.5855	70.0304	65.7386	46.4578	47.0824	38.783	42.6785	44.5164	31.5824	25.3337	37.6197	58.8645	50.907	40.0291	31.3906	31.9701		0.826009	1.12136	1.05263	0.743902	0.753903	0.62101	0.683386	0.712816	0.505711	0.405654	0.602383	0.942563	0.815145	0.640963	0.50264	0.511919			1.42339	0.013991	-0.495052	+	0.9675	0.0034908	-0.486701	+
116	P13196	ALAS1	5-aminolevulinate synthase, nonspecific, mitochondrial OS=Homo sapiens OX=9606 GN=ALAS1 PE=1 SV=2	8			2150.37	2714.89	2848.18	1549.14	1366.45	1442.55	1399.74	1566.98	884.38	816.567	979.772	1324.15	1312.47	602.963	599.849	656.111		0.836347	1.05591	1.10775	0.602509	0.531455	0.561053	0.544403	0.609448	0.343963	0.317589	0.381064	0.515004	0.510461	0.234511	0.2333	0.255182		+	2.41177	0.000426877	-0.814999	+	2.10201	0.000482456	-0.73294	+
117	Q13740	ALCAM	CD166 antigen OS=Homo sapiens OX=9606 GN=ALCAM PE=1 SV=2	1			114.168	161.862	166.65	130.365	105.099	136.44	133.938	135.442	94.4124	73.2779	88.1222	177.822	168.403	89.5172	110.998	116.834		0.773706	1.09692	1.12937	0.883471	0.712246	0.924641	0.907685	0.917877	0.639824	0.496597	0.597196	1.20508	1.14125	0.606649	0.752223	0.791773			0.498541	0.391532	-0.240057	+	1.74795	0.00111726	-0.667595	+
118	Q8IZ83	ALDH16A1	Aldehyde dehydrogenase family 16 member A1 OS=Homo sapiens OX=9606 GN=ALDH16A1 PE=1 SV=2	7			1070.04	1398.26	1517.44	1026.94	940.657	992.236	590.297	746.304	601.763	556.654	694.007	707.908	663.041	457.48	472.343	617.429		0.805401	1.05245	1.14215	0.772961	0.708017	0.746839	0.444307	0.561731	0.452937	0.418984	0.522367	0.532831	0.49906	0.344338	0.355525	0.464729			1.24357	0.0537541	-0.414696		0.242831	0.489314	-0.110293	+
119	P54886	ALDH18A1	Delta-1-pyrroline-5-carboxylate synthase OS=Homo sapiens OX=9606 GN=ALDH18A1 PE=1 SV=2	13			3748.74	4730.69	4590.51	2859.39	2494.69	2250.19	1893.34	2155.76	1431.48	1336.03	1592.11	1894.59	1873.88	1168.94	1087	1069.11		0.860465	1.08586	1.05368	0.656328	0.572617	0.516496	0.434587	0.494821	0.328574	0.306665	0.365444	0.434873	0.43012	0.268312	0.249504	0.245397		+	2.23653	0.00054448	-0.780832	+	1.57093	0.00301108	-0.479098	+
120	P47895	ALDH1A3	Aldehyde dehydrogenase family 1 member A3 OS=Homo sapiens OX=9606 GN=ALDH1A3 PE=1 SV=2	9			1521.85	1893.43	1961.19	1337.35	1230.14	1186.85	1640.39	1852.73	1480.59	1252.17	1434.35	1538.42	1528.83	1109.62	1058.5	1120.23		0.849172	1.05651	1.09432	0.746224	0.686402	0.662247	0.915316	1.0338	0.82615	0.698694	0.800349	0.858418	0.853067	0.619153	0.590629	0.625074		+	1.82048	0.00887787	-0.511074		1.18961	0.018715	-0.331513	+
121	P30837	ALDH1B1	Aldehyde dehydrogenase X, mitochondrial OS=Homo sapiens OX=9606 GN=ALDH1B1 PE=1 SV=3	6			841.551	1042.78	1057.71	653.091	608.158	582.809	642.763	739.261	525.256	433.453	511.005	694.775	658.954	433.047	401.23	424.092		0.85813	1.06332	1.07855	0.665957	0.620139	0.59429	0.655426	0.753825	0.535604	0.441992	0.521072	0.708462	0.671936	0.441578	0.409134	0.432447		+	2.33245	0.00141828	-0.667844	+	1.46389	0.00240633	-0.497774	+
122	P05091	ALDH2	Aldehyde dehydrogenase, mitochondrial OS=Homo sapiens OX=9606 GN=ALDH2 PE=1 SV=2	3			577.098	716.355	694.563	483.218	477.155	418.257	390.757	425.244	291.499	290.706	329.017	572.279	569.978	427.916	385.293	414.145		0.870865	1.08101	1.04812	0.729196	0.720047	0.631167	0.589669	0.641711	0.439884	0.438688	0.496501	0.863593	0.860121	0.645743	0.581423	0.624962		+	1.94813	0.00687207	-0.524692	+	1.76886	0.00403055	-0.426877	+
123	P51648	ALDH3A2	Fatty aldehyde dehydrogenase OS=Homo sapiens OX=9606 GN=ALDH3A2 PE=1 SV=1	7			1095.81	1396.67	1474.28	939.58	866.857	929.659	872.577	940.695	659.095	593.892	708.604	1064.48	1089.95	583.896	663.491	731.976		0.828744	1.05628	1.11498	0.71059	0.655591	0.703087	0.659917	0.711433	0.498463	0.449151	0.535906	0.80505	0.824313	0.441592	0.501788	0.553582		+	1.73563	0.00786591	-0.525091	+	1.70784	0.00295161	-0.474282	+
124	P43353	ALDH3B1	Aldehyde dehydrogenase family 3 member B1 OS=Homo sapiens OX=9606 GN=ALDH3B1 PE=1 SV=1	1			44.8718	62.0187	59.3801	39.4652	31.6272	42.8434	57.8134	57.043	45.1548	43.8502	49.3122	81.4106	82.6252	51.6434	51.8987	58.9722		0.809616	1.119	1.07139	0.712066	0.570646	0.773018	1.04312	1.02922	0.814723	0.791184	0.889734	1.46888	1.4908	0.931796	0.936402	1.06403		+	1.2959	0.00911398	-0.542557		1.76924	0.0181697	-0.318591	+
125	Q02252	ALDH6A1	Methylmalonate-semialdehyde dehydrogenase [acylating], mitochondrial OS=Homo sapiens OX=9606 GN=ALDH6A1 PE=1 SV=2	1			27.0426	29.8683	30.245	18.7996	12.2463	12.9347	22.3561	25.8846	14.7109	12.1251	15.5424	19.9647	20.5851	7.59095	12.7621	11.6184		0.930835	1.0281	1.04107	0.647102	0.421531	0.445226	0.769521	0.890976	0.506365	0.417359	0.534986	0.687206	0.708561	0.261289	0.439285	0.399918		+	2.13699	0.000232323	-1.01208	+	1.77025	0.000506912	-0.776018	+
126	P49419	ALDH7A1	Alpha-aminoadipic semialdehyde dehydrogenase OS=Homo sapiens OX=9606 GN=ALDH7A1 PE=1 SV=5	4			610.331	786.629	847.931	564.471	511.526	484.375	648.562	696.713	470.434	471.564	518.942	639.869	665.104	446.627	410.305	438.154		0.815627	1.05123	1.13315	0.754341	0.683587	0.647303	0.866717	0.931065	0.628673	0.630183	0.693497	0.8551	0.888824	0.596858	0.548318	0.585535			1.50936	0.0106379	-0.513797	+	2.13663	0.00266202	-0.466565	+
127	P49189	ALDH9A1	4-trimethylaminobutyraldehyde dehydrogenase OS=Homo sapiens OX=9606 GN=ALDH9A1 PE=1 SV=3	6			1199.51	1397.45	1466.72	864.357	696.833	688.56	1022.82	1171.21	740.006	701.699	790.522	904.86	924.689	524.757	481.952	540.078		0.885535	1.03166	1.0828	0.638109	0.514435	0.508327	0.755094	0.864642	0.546307	0.518027	0.583601	0.66801	0.682649	0.3874	0.3558	0.398711		+	2.46526	0.000519231	-0.855866	+	1.98125	0.00118622	-0.558473	+
128	P04075	ALDOA	Fructose-bisphosphate aldolase A OS=Homo sapiens OX=9606 GN=ALDOA PE=1 SV=2	17			3058.33	4179.38	3981.21	3085.62	2941.92	2766.88	1771.11	2068.06	1645.19	1397.84	1613.13	2860.75	2744.53	2315.22	2048.93	2227.83		0.817814	1.11759	1.0646	0.825112	0.786685	0.739879	0.473604	0.55301	0.439933	0.37379	0.43136	0.76498	0.733902	0.619102	0.547895	0.595734			1.08455	0.16123	-0.339554		1.02319	0.0304077	-0.306027	+
129	P09972	ALDOC	Fructose-bisphosphate aldolase C OS=Homo sapiens OX=9606 GN=ALDOC PE=1 SV=2	6			1131.95	1569.62	1476.98	1115.98	1099.39	995.214	654.169	722.235	580.071	487.232	560.636	1057.65	1059.9	746.622	762.495	757.063		0.812686	1.12691	1.0604	0.801221	0.78931	0.714516	0.469662	0.51853	0.416463	0.349809	0.40251	0.759342	0.760958	0.536039	0.547435	0.543535			1.12494	0.113518	-0.367928		1.2599	0.0140334	-0.345098	+
130	Q9BT22	ALG1	Chitobiosyldiphosphodolichol beta-mannosyltransferase OS=Homo sapiens OX=9606 GN=ALG1 PE=1 SV=2	3			633.01	839.495	886.862	565.087	499.01	523.691	441.681	539.967	370.476	332.463	426.777	530.077	538.305	300.905	257.601	359.538		0.80489	1.06744	1.12767	0.718524	0.634505	0.665888	0.56161	0.686583	0.47107	0.422736	0.542659	0.674007	0.68447	0.382609	0.327547	0.457162		+	1.60344	0.00579211	-0.558067		0.945168	0.0100805	-0.382586	+
131	Q2TAA5	ALG11	GDP-Man:Man(3)GlcNAc(2)-PP-Dol alpha-1,2-mannosyltransferase OS=Homo sapiens OX=9606 GN=ALG11 PE=1 SV=2	1			25.0329	26.132	23.9018	20.7295	12.2964	11.0356	23.7407	24.3811	16.4314	13.4593	15.9694	29.4355	27.8742	13.0944	16.1354	13.4916		1.00043	1.04435	0.955222	0.828443	0.491419	0.441032	0.948784	0.974377	0.656672	0.537894	0.638208	1.17637	1.11398	0.523311	0.644843	0.539184		+	1.36072	0.000601019	-0.824892	+	1.95814	0.0011462	-0.659773	+
132	Q9H553	ALG2	Alpha-1,3/1,6-mannosyltransferase ALG2 OS=Homo sapiens OX=9606 GN=ALG2 PE=1 SV=1	5			308.206	370.799	422.614	243.07	236.812	232.372	271.67	319.114	205.707	186.387	245.657	250.721	266.175	125.493	138.578	164.229		0.839326	1.00978	1.15089	0.661944	0.644902	0.63281	0.739829	0.869032	0.560195	0.507581	0.668989	0.68278	0.724865	0.341751	0.377385	0.447239		+	2.00738	0.00237758	-0.617441	+	1.15478	0.0033746	-0.479451	+
133	Q92685	ALG3	Dol-P-Man:Man(5)GlcNAc(2)-PP-Dol alpha-1,3-mannosyltransferase OS=Homo sapiens OX=9606 GN=ALG3 PE=1 SV=1	2			123.056	147.192	161.093	116.599	99.9089	103.299	100.713	85.1701	58.6854	55.1199	68.3997	92.0897	104.952	54.3914	56.8237	54.4588		0.855861	1.02373	1.12041	0.810952	0.694872	0.71845	0.700464	0.592363	0.40816	0.383362	0.475724	0.640489	0.729947	0.378295	0.395212	0.378764			1.48633	0.0372719	-0.425947	+	1.58341	0.00111573	-0.614741	+
134	Q9Y673	ALG5	Dolichyl-phosphate beta-glucosyltransferase OS=Homo sapiens OX=9606 GN=ALG5 PE=1 SV=1	4			1031.5	1323.43	1381.07	943.314	838.337	930.435	711.419	734.792	512.012	472.964	578.448	773.329	780.054	454.724	513.134	524.117		0.828292	1.06271	1.109	0.757479	0.673183	0.747137	0.571268	0.590036	0.411145	0.379789	0.464493	0.620982	0.626382	0.365142	0.412046	0.420865			1.47835	0.0244866	-0.452474	+	1.64163	0.00295414	-0.477319	+
135	Q9BVK2	ALG8	Probable dolichyl pyrophosphate Glc1Man9GlcNAc2 alpha-1,3-glucosyltransferase OS=Homo sapiens OX=9606 GN=ALG8 PE=1 SV=2	1			268.192	322.196	353.782	263.251	225.345	281.492	161.885	196.315	140.44	137.492	170.641	183.045	210.381	124.616	142.357	168.907		0.852152	1.02374	1.1241	0.836452	0.71601	0.894411	0.514372	0.62377	0.446233	0.436866	0.542194	0.581606	0.668463	0.395954	0.452324	0.536684			0.897966	0.270157	-0.290799		0.674161	0.0837069	-0.260648	+
136	Q6P6C2	ALKBH5	RNA demethylase ALKBH5 OS=Homo sapiens OX=9606 GN=ALKBH5 PE=1 SV=2	1			245.91	285.06	306.871	196.163	172.744	168.674	230.205	243.812	170.698	164.088	176.005	192.172	200.393	117.913	107.891	119.48		0.880513	1.02069	1.09879	0.702387	0.618533	0.603959	0.824279	0.873001	0.611207	0.587539	0.630209	0.688097	0.717534	0.422203	0.386318	0.427814		+	2.27549	0.00179264	-0.637367	+	2.64328	0.00181801	-0.477167	+
137	Q96BT7	ALKBH8	Alkylated DNA repair protein alkB homolog 8 OS=Homo sapiens OX=9606 GN=ALKBH8 PE=1 SV=2	1			301.327	362.833	390.131	241.041	205.519	226.486	208.121	230.576	125.004	119.59	146.111	205.493	202.974	110.48	110.908	121.696		0.85743	1.03245	1.11012	0.685886	0.584807	0.644469	0.592211	0.656107	0.355701	0.340295	0.415761	0.584733	0.577565	0.314372	0.31559	0.346288		+	2.11196	0.00176898	-0.642207	+	2.03374	0.000510441	-0.75562	+
138	P05187	ALPP	Alkaline phosphatase, placental type OS=Homo sapiens OX=9606 GN=ALPP PE=1 SV=2	3			140.054	160.225	209.884	126.069	111.561	107.643	89.0834	105.644	90.5224	89.5356	79.7372	70.7981	91.6732	61.5499	50.4348	53.1623		0.823584	0.942199	1.23422	0.741345	0.656032	0.632992	0.523853	0.621237	0.532315	0.526512	0.468892	0.416326	0.539082	0.361943	0.296581	0.312619		+	1.3775	0.00805105	-0.545791		0.591013	0.262625	-0.166151	+
139	Q86V81	ALYREF	THO complex subunit 4 OS=Homo sapiens OX=9606 GN=ALYREF PE=1 SV=3	9			1708.28	2902.16	2790.79	1734.44	1510.4	1523.26	778.523	1248.34	815.764	736.674	815.603	935.015	1101.94	593.17	629.136	652.19		0.692431	1.17636	1.13121	0.703034	0.612223	0.617435	0.315565	0.506	0.33066	0.298602	0.330595	0.378997	0.446658	0.240434	0.255013	0.264357		+	1.10553	0.00609434	-0.597927		0.51469	0.0447696	-0.322324	+
140	Q9C0C7	AMBRA1	Activating molecule in BECN1-regulated autophagy protein 1 OS=Homo sapiens OX=9606 GN=AMBRA1 PE=1 SV=2	1			37.1325	40.7794	44.2108	26.1806	18.344	26.3119	24.3729	27.9483	17.4049	12.466	19.4238	24.0421	20.5967	13.3897	12.0985	15.0608		0.912177	1.00176	1.08606	0.643138	0.450629	0.646364	0.598731	0.686563	0.427559	0.306233	0.477155	0.590605	0.505967	0.328924	0.297205	0.369975		+	1.89382	0.000635707	-0.8018	+	1.12177	0.00107074	-0.692247	+
141	P17707	AMD1	S-adenosylmethionine decarboxylase proenzyme OS=Homo sapiens OX=9606 GN=AMD1 PE=1 SV=2	1			183.356	246.9	254.204	135.176	129.989	122.078	134.072	141.235	98.046	76.1576	89.6569	143.503	141.523	63.8174	65.8369	68.2143		0.803653	1.08217	1.11418	0.592479	0.569744	0.53507	0.58764	0.619035	0.429737	0.3338	0.392968	0.628976	0.620298	0.279713	0.288564	0.298984		+	2.174	0.000384798	-0.807843	+	1.72672	0.00105376	-0.653527	+
142	Q86WK6	AMIGO1	Amphoterin-induced protein 1 OS=Homo sapiens OX=9606 GN=AMIGO1 PE=1 SV=1	3			3826.01	5006.47	4214.48	4073.3	3504.4	4354.53	1923.34	2399.38	2146.92	1950.75	2324.09	2266.66	2532.72	1477.4	1800.03	2107.02		0.879747	1.15118	0.969072	0.936609	0.805797	1.00127	0.44225	0.55171	0.49366	0.448553	0.534398	0.521193	0.58237	0.339711	0.413896	0.484485			0.357325	0.642668	-0.125702		0.0189415	0.95717	-0.00881667	+
143	Q8IY45	AMN1	Protein AMN1 homolog OS=Homo sapiens OX=9606 GN=AMN1 PE=2 SV=4	1			48.8976	59.1398	63.7096	46.6971	41.4838	40.2927	47.119	51.3665	30.1804	28.1335	29.2287	43.7782	47.929	24.8099	22.8002	26.019		0.854121	1.03303	1.11285	0.815684	0.724621	0.703815	0.823054	0.897247	0.527178	0.491423	0.510554	0.764698	0.837202	0.433368	0.398264	0.454488			1.46341	0.0467215	-0.413001	+	2.96728	0.000167341	-0.754139	+
144	Q01433	AMPD2	AMP deaminase 2 OS=Homo sapiens OX=9606 GN=AMPD2 PE=1 SV=2	1			52.446	66.5709	64.8937	49.1841	41.8491	42.4009	29.359	34.8546	22.6623	22.6933	22.4881	29.4323	32.834	20.1195	19.4252	20.3126		0.855513	1.08592	1.05856	0.802304	0.682654	0.691655	0.478912	0.568558	0.369674	0.370179	0.366832	0.480108	0.535597	0.328195	0.316869	0.331345			1.59209	0.0202947	-0.458773	+	1.90814	0.00175795	-0.500335	+
145	Q9H1A4	ANAPC1	Anaphase-promoting complex subunit 1 OS=Homo sapiens OX=9606 GN=ANAPC1 PE=1 SV=1	7			1345.23	1739.32	1914.57	1195.26	1131.82	1170.93	733.92	879.034	651.736	574.554	713.07	891.588	878.403	490.068	543.414	636.819		0.80728	1.04378	1.14894	0.717282	0.679212	0.702682	0.44043	0.527513	0.39111	0.344793	0.427917	0.535047	0.527135	0.294093	0.326106	0.382159			1.50435	0.0122393	-0.499924		0.898279	0.026982	-0.318846	+
146	Q9UJX6	ANAPC2	Anaphase-promoting complex subunit 2 OS=Homo sapiens OX=9606 GN=ANAPC2 PE=1 SV=1	1			104.378	124.561	123.681	63.8326	56.1987	68.2541	94.5374	101.175	54.9797	49.0689	60.1059	98.822	101.399	47.6369	40.6989	47.8061		0.888021	1.05973	1.05225	0.543071	0.478124	0.580688	0.8043	0.860771	0.467753	0.417466	0.511365	0.840752	0.862677	0.405282	0.346256	0.406722		+	2.8215	0.000197002	-0.905111	+	2.27695	0.000198718	-0.842762	+
147	Q9UJX4	ANAPC5	Anaphase-promoting complex subunit 5 OS=Homo sapiens OX=9606 GN=ANAPC5 PE=1 SV=2	3			427.19	567.966	539.886	313.108	284.936	297.596	257.24	287.014	182.54	149.539	188.432	299.288	291.095	137.334	159.874	159.1		0.834876	1.11	1.05512	0.611921	0.556863	0.581605	0.502735	0.560924	0.356746	0.292251	0.368261	0.584912	0.5689	0.268398	0.312449	0.310936		+	2.35489	0.000641667	-0.767561	+	1.67565	0.00117593	-0.654525	+
148	Q9UJX3	ANAPC7	Anaphase-promoting complex subunit 7 OS=Homo sapiens OX=9606 GN=ANAPC7 PE=1 SV=4	2			61.0099	83.2357	91.24	53.0712	56.251	57.7285	38.5886	51.4127	33.8933	29.3336	37.1674	40.7451	49.6714	24.9287	25.5787	32.9935		0.777244	1.06039	1.16236	0.676108	0.716617	0.73544	0.491605	0.654979	0.431788	0.373699	0.473499	0.519078	0.632795	0.317582	0.325863	0.420325			1.24541	0.0210598	-0.475607	+	0.893418	0.00763461	-0.419286	+
149	Q9P2R3	ANKFY1	Rabankyrin-5 OS=Homo sapiens OX=9606 GN=ANKFY1 PE=1 SV=2	10			1997.03	2493.58	2738.42	1543.01	1344.3	1478.65	1261.37	1444.36	941.425	856.073	1088.8	1275.8	1348.29	732.11	810.912	830.746		0.828754	1.03482	1.13643	0.640339	0.557876	0.61363	0.52346	0.5994	0.390685	0.355265	0.451845	0.529449	0.559532	0.303821	0.336523	0.344754		+	2.08543	0.000689446	-0.717512	+	1.34658	0.00291097	-0.495557	+
150	Q8IWZ3	ANKHD1	Ankyrin repeat and KH domain-containing protein 1 OS=Homo sapiens OX=9606 GN=ANKHD1 PE=1 SV=1	13			1790.65	2166.3	2296.71	1234.34	1109.24	1175.15	1341.25	1328.44	728.821	651.378	763.299	1486.82	1408.8	649.494	643.692	678.642		0.859009	1.03922	1.10178	0.592136	0.532124	0.563742	0.643423	0.637278	0.349629	0.312478	0.366169	0.713256	0.675828	0.311575	0.308791	0.325558		+	2.66429	0.000472303	-0.823043	+	2.70969	0.000246032	-0.904814	+
151	Q9P2G1	ANKIB1	Ankyrin repeat and IBR domain-containing protein 1 OS=Homo sapiens OX=9606 GN=ANKIB1 PE=1 SV=3	2			75.8479	97.2568	111.332	65.0131	62.6334	54.6205	64.919	86.0204	70.2162	53.7529	68.5226	71.1763	83.7119	43.0604	48.518	55.9218		0.79998	1.02578	1.17424	0.685704	0.660605	0.576091	0.684711	0.907271	0.740582	0.566941	0.722719	0.750708	0.882923	0.454165	0.511727	0.589816		+	1.60574	0.00309537	-0.6282		0.430254	0.152025	-0.230084	+
152	Q86XL3	ANKLE2	Ankyrin repeat and LEM domain-containing protein 2 OS=Homo sapiens OX=9606 GN=ANKLE2 PE=1 SV=4	4			578.353	670.182	764.349	452.023	436.367	424.703	450.453	515.409	329.313	287.246	390.996	425.93	422.689	238.199	261.979	272.768		0.861977	0.998838	1.13918	0.673695	0.650361	0.632977	0.671355	0.768165	0.490808	0.428111	0.58274	0.634806	0.629975	0.355012	0.390453	0.406533		+	2.15643	0.00255415	-0.607447	+	1.21697	0.00211137	-0.532247	+
153	Q8IV38	ANKMY2	Ankyrin repeat and MYND domain-containing protein 2 OS=Homo sapiens OX=9606 GN=ANKMY2 PE=1 SV=1	1			139.213	173.714	174.3	100.276	88.7616	86.3126	117.163	121.175	68.6134	49.401	67.552	108.514	113.515	62.6284	56.4886	60.6172		0.857175	1.06961	1.07322	0.617429	0.546531	0.531452	0.721407	0.74611	0.422473	0.304176	0.415938	0.668153	0.698945	0.385621	0.347817	0.373238		+	2.53606	0.00045	-0.818651	+	1.76572	0.000225045	-0.961723	+
154	O75179	ANKRD17	Ankyrin repeat domain-containing protein 17 OS=Homo sapiens OX=9606 GN=ANKRD17 PE=1 SV=3	13			3066.35	3693.56	3608.1	1794.74	1596.5	1750.7	2776.05	2622.49	1231.36	1084.61	1227.97	2835.58	2588.42	1018.32	990.551	1062.35		0.887253	1.06874	1.04401	0.519311	0.46195	0.506568	0.803254	0.758822	0.356296	0.313834	0.355315	0.82048	0.748963	0.294652	0.286617	0.307393		+	3.28467	0	-1.00872	+	3.1266	0	-1.19408	+
155	O15084	ANKRD28	Serine/threonine-protein phosphatase 6 regulatory ankyrin repeat subunit A OS=Homo sapiens OX=9606 GN=ANKRD28 PE=1 SV=5	8			1210.64	1495.4	1602.98	912.903	887.482	934.395	811.812	904.963	656.013	599.316	795.437	842.771	929.181	548.877	537.694	608.453		0.842865	1.04112	1.11602	0.635576	0.617877	0.650539	0.565195	0.630048	0.456725	0.417252	0.553794	0.586749	0.646909	0.382136	0.37435	0.423613		+	2.19366	0.00163719	-0.64621		0.867031	0.0213799	-0.336573	+
156	Q6AI12	ANKRD40	Ankyrin repeat domain-containing protein 40 OS=Homo sapiens OX=9606 GN=ANKRD40 PE=1 SV=2	1			57.9364	80.1917	84.1833	52.4754	45.2133	49.9137	67.1515	70.281	51.9125	46.7721	60.0621	54.9176	53.2609	31.5869	37.2981	40.0679		0.781828	1.08215	1.13602	0.708134	0.610135	0.673565	0.906182	0.948413	0.700538	0.63117	0.810513	0.74109	0.718734	0.426252	0.503322	0.5407		+	1.47492	0.0053166	-0.574544	+	1.16796	0.0081487	-0.384215	+
157	Q9H8Y5	ANKZF1	Ankyrin repeat and zinc finger domain-containing protein 1 OS=Homo sapiens OX=9606 GN=ANKZF1 PE=1 SV=1	2			326.767	394.987	406.968	232.055	225.507	228.674	234.324	250.195	149.809	128.449	165.96	238.727	245.703	120.182	143.737	128.576		0.868505	1.04983	1.08167	0.616773	0.599369	0.607787	0.622803	0.664987	0.398173	0.341401	0.441101	0.634506	0.653047	0.319429	0.382035	0.341739		+	2.68755	0.000617801	-0.71135	+	1.81596	0.000427184	-0.717394	+
158	Q9NQW6	ANLN	Anillin OS=Homo sapiens OX=9606 GN=ANLN PE=1 SV=2	11			1201.27	1453.33	1685.44	893.165	821.568	799.701	1338.3	1451.52	846.853	787.146	967.194	1090.11	1106.76	481.909	525.947	596.345		0.830363	1.0046	1.16504	0.617389	0.567899	0.552784	0.925084	1.00335	0.585377	0.544105	0.668561	0.753525	0.765034	0.333114	0.363554	0.412216		+	2.18371	0.000631795	-0.775355	+	1.97613	0.000584559	-0.690062	+
159	Q5XXA6	ANO1	Anoctamin-1 OS=Homo sapiens OX=9606 GN=ANO1 PE=1 SV=1	8			868.318	1063.41	1108	736.68	660.976	710.388	1581.82	1805.03	1421.77	1278.74	1446.42	2805.14	3116.54	2501.9	2369.02	2397.55		0.856969	1.04951	1.09352	0.727052	0.652337	0.701104	1.56115	1.78144	1.40319	1.26203	1.42752	2.76848	3.07581	2.4692	2.33806	2.36622		+	1.93846	0.00716984	-0.521497		1.20112	0.035213	-0.291838
160	Q4KMQ2	ANO6	Anoctamin-6 OS=Homo sapiens OX=9606 GN=ANO6 PE=1 SV=2	1			47.0605	63.7825	55.8736	39.2827	33.5608	34.991	31.6709	37.7798	28.3708	28.9797	33.7553	33.6738	38.9344	18.3443	21.9331	24.0016		0.846835	1.14774	1.00542	0.706877	0.603913	0.629649	0.569905	0.679833	0.510521	0.521478	0.607413	0.605947	0.700609	0.330099	0.394678	0.431899		+	1.90164	0.0025529	-0.62073		0.582834	0.203898	-0.192199	+
161	P39687	ANP32A	Acidic leucine-rich nuclear phosphoprotein 32 family member A OS=Homo sapiens OX=9606 GN=ANP32A PE=1 SV=1	3			1010.76	1145.02	1142.22	814.846	807.328	827.287	538.337	558.732	378.253	385.003	397.803	660.406	678.349	415.843	467.552	513.315		0.91943	1.04156	1.03901	0.741218	0.73438	0.752535	0.489694	0.508246	0.344075	0.350215	0.361858	0.600733	0.617055	0.378268	0.425305	0.466933			2.67771	0.0211705	-0.426789	+	3.17475	0.00142355	-0.503241	+
162	Q92688	ANP32B	Acidic leucine-rich nuclear phosphoprotein 32 family member B OS=Homo sapiens OX=9606 GN=ANP32B PE=1 SV=1	5			1270.74	1602.79	1683.23	1165.7	1198.2	1120.2	605.719	671.426	519.664	461.131	524.031	833.472	855.825	551.669	663.951	638.374		0.836608	1.05522	1.10818	0.767453	0.78885	0.737498	0.398783	0.442042	0.342127	0.303591	0.345002	0.548727	0.563443	0.363198	0.43712	0.420282			1.37356	0.0874839	-0.377222		1.45903	0.0122765	-0.348803	+
163	Q9BTT0	ANP32E	Acidic leucine-rich nuclear phosphoprotein 32 family member E OS=Homo sapiens OX=9606 GN=ANP32E PE=1 SV=1	3			756.096	946.116	1097.14	627.142	534.047	566.389	453.098	528.247	297.365	253.634	307.903	479.476	513.417	308.018	334.652	329.108		0.81029	1.01393	1.17578	0.672093	0.572326	0.606986	0.485575	0.56611	0.318679	0.271814	0.329972	0.513843	0.550217	0.330096	0.358639	0.352697		+	1.797	0.00154378	-0.682903	+	1.95324	0.000533333	-0.778032	+
164	P04083	ANXA1	Annexin A1 OS=Homo sapiens OX=9606 GN=ANXA1 PE=1 SV=2	12			1373.12	1901	1939.82	1326.99	1397.2	1254.74	1146.18	1322.46	974.144	900.021	1027.45	1968.06	2132.38	1439.15	1447.2	1517.77		0.790067	1.0938	1.11613	0.763524	0.803922	0.721953	0.65949	0.760918	0.560504	0.517855	0.591175	1.13238	1.22693	0.828059	0.832691	0.873295			1.04834	0.110743	-0.374018		1.35019	0.0126261	-0.35026	+
165	P50995	ANXA11	Annexin A11 OS=Homo sapiens OX=9606 GN=ANXA11 PE=1 SV=1	1			61.5386	79.0344	80.8289	224.972	114.656	175.778	43.4845	49.2271	34.3356	32.2505	32.606	65.0539	51.6816	33.7086	44.0808	53.5675		0.833849	1.07092	1.09523	3.04837	1.55359	2.3818	0.589216	0.667028	0.465248	0.436995	0.441812	0.881482	0.700287	0.456752	0.597296	0.725841		+	1.71283	0	1.17592	+	2.1127	0.00211429	-0.485256	+
166	P07355	ANXA2	Annexin A2 OS=Homo sapiens OX=9606 GN=ANXA2 PE=1 SV=2	24			2775	3579.04	3719.71	2543.89	2734.4	2475.02	2342.35	2762.28	2050.26	1836.24	2159.28	3673.07	3900.36	2999.69	2838.17	3023.13		0.826405	1.06585	1.10774	0.75758	0.814314	0.73707	0.69756	0.822617	0.610575	0.546839	0.643042	1.09385	1.16154	0.893319	0.845218	0.900299			1.23729	0.106668	-0.367183		1.13208	0.0170808	-0.339204	+
167	P12429	ANXA3	Annexin A3 OS=Homo sapiens OX=9606 GN=ANXA3 PE=1 SV=3	9			588.478	675.756	749.197	488.064	556.524	487.666	589.161	688.489	521.611	464.97	555.698	926.035	930.226	672.182	693.619	727.186		0.876829	1.00687	1.1163	0.727212	0.829217	0.726619	0.877846	1.02584	0.777197	0.692802	0.827987	1.37979	1.38603	1.00155	1.03349	1.0835			1.5124	0.0667671	-0.389809		1.03348	0.026834	-0.31291	+
168	P09525	ANXA4	Annexin A4 OS=Homo sapiens OX=9606 GN=ANXA4 PE=1 SV=4	3			219.356	279.504	278.579	551.958	320.823	669.115	177.008	172.501	125.849	107.977	116.621	322.768	212.927	97.95	212.121	202.303		0.846456	1.07856	1.07499	2.12991	1.238	2.582	0.683043	0.665651	0.485629	0.416664	0.45002	1.2455	0.821648	0.377972	0.818538	0.780652		+	1.29207	0.000378063	0.931454	+	2.22119	0.00114172	-0.583794	+
169	P08758	ANXA5	Annexin A5 OS=Homo sapiens OX=9606 GN=ANXA5 PE=1 SV=2	12			1727.32	2068.87	2188.45	1919.36	1836.07	2029.32	1330.85	1401.62	1084.29	1002.97	1187.08	2093.77	2079.83	1484.59	1699.94	1719.51		0.865877	1.03709	1.09703	0.962143	0.920391	1.01726	0.667133	0.702609	0.543536	0.502772	0.595063	1.04957	1.04258	0.7442	0.852152	0.861962			0.143634	0.896498	-0.043015		1.38647	0.0182513	-0.326906	+
170	P08133	ANXA6	Annexin A6 OS=Homo sapiens OX=9606 GN=ANXA6 PE=1 SV=3	14			1348.66	1651.43	1777.79	4477.91	2815.59	6169.45	1309.82	1248.4	902.594	811.321	934.493	4814.12	1639.08	782.897	3082.1	3766.96		0.846815	1.03692	1.11626	2.81165	1.76789	3.87376	0.822428	0.783862	0.566733	0.509423	0.586762	3.02275	1.02917	0.491576	1.93523	2.36525		+	1.82744	0	1.43203	+	2.12118	0.00129262	-0.537141
171	P28039	AOAH	Acyloxyacyl hydrolase OS=Homo sapiens OX=9606 GN=AOAH PE=1 SV=1	1			244.389	289.3	308.813	169.097	189.094	172.468	134.969	142.633	97.3377	98.7735	110.65	205.198	223.07	119.698	139.342	153.209		0.870226	1.03015	1.09963	0.602124	0.67333	0.614128	0.480601	0.507891	0.346602	0.351715	0.394005	0.730674	0.794313	0.426223	0.496172	0.54555		+	2.38396	0.00152502	-0.661732	+	1.91822	0.00333414	-0.442711	+
172	Q10567	AP1B1	AP-1 complex subunit beta-1 OS=Homo sapiens OX=9606 GN=AP1B1 PE=1 SV=2	10			2364.52	3120.04	3306.85	2267.12	2112.84	2099.69	1760.88	1973.04	1354.76	1249.43	1436.65	2108.28	2172.69	1264.5	1308.78	1440.95		0.806874	1.06469	1.12844	0.773637	0.72099	0.716503	0.600887	0.673284	0.462301	0.426358	0.490246	0.719434	0.741413	0.431501	0.446611	0.491713			1.30117	0.0427815	-0.426116	+	1.77698	0.00302009	-0.47102	+
173	O43747	AP1G1	AP-1 complex subunit gamma-1 OS=Homo sapiens OX=9606 GN=AP1G1 PE=1 SV=5	9			1963.16	2431.62	2594.84	1684.94	1428.93	1423.41	1393.42	1603.08	1119.09	1086.25	1268.6	1436.06	1569.94	1000.88	980.696	1079.19		0.842604	1.04367	1.11373	0.72319	0.613308	0.610939	0.598067	0.688055	0.480322	0.466227	0.544493	0.616368	0.673831	0.429586	0.420922	0.463197		+	1.87818	0.00267182	-0.617919	+	1.30494	0.00894694	-0.371432	+
174	Q9BXS5	AP1M1	AP-1 complex subunit mu-1 OS=Homo sapiens OX=9606 GN=AP1M1 PE=1 SV=3	16			2512.42	3173.7	3370.54	1928.74	1686.32	1753.22	2427.06	2580.73	1527.19	1356.47	1554.49	2424.24	2539.4	1184.64	1184.57	1280.06		0.832234	1.05128	1.11648	0.638891	0.55859	0.580751	0.803959	0.854862	0.505879	0.449328	0.514922	0.803025	0.841171	0.39241	0.392386	0.424017		+	2.20623	0.000645397	-0.74556	+	2.51352	0.000379974	-0.761102	+
175	Q9Y6Q5	AP1M2	AP-1 complex subunit mu-2 OS=Homo sapiens OX=9606 GN=AP1M2 PE=1 SV=4	10			1886.8	2363.93	2446.39	1415.17	1283.01	1309	1288.23	1361.06	810.182	725.798	847.427	1179.58	1204.05	576.641	563.866	601.381		0.845199	1.05893	1.09587	0.633931	0.574729	0.586371	0.577067	0.609692	0.362924	0.325124	0.379608	0.528397	0.539359	0.258308	0.252586	0.269391		+	2.37181	0.000636691	-0.732937	+	2.41486	0.00052381	-0.740021	+
176	P61966	AP1S1	AP-1 complex subunit sigma-1A OS=Homo sapiens OX=9606 GN=AP1S1 PE=1 SV=1	2			722.285	868.288	943.718	486.326	451.478	451.767	646.86	647.439	344.197	304.829	365.68	543.92	572.786	288.399	295.347	345.661		0.855014	1.02785	1.11714	0.575695	0.534443	0.534785	0.765729	0.766414	0.407448	0.360845	0.432878	0.643872	0.678043	0.341396	0.349621	0.409181		+	2.70366	0.00034904	-0.85898	+	2.59774	0.00026898	-0.94016	+
177	O95782	AP2A1	AP-2 complex subunit alpha-1 OS=Homo sapiens OX=9606 GN=AP2A1 PE=1 SV=3	14			3788.12	4959.61	5008.83	3468.6	3185.79	3298.82	2944.8	3271.51	2273.52	2039.56	2421.26	3325.73	3420.44	2025.33	1984.98	2257.62		0.826105	1.08158	1.09231	0.756425	0.69475	0.719399	0.642195	0.713444	0.495804	0.444783	0.528023	0.725268	0.745922	0.441679	0.43288	0.492337			1.5382	0.0217149	-0.456076	+	1.64016	0.0031319	-0.471082	+
178	O94973	AP2A2	AP-2 complex subunit alpha-2 OS=Homo sapiens OX=9606 GN=AP2A2 PE=1 SV=2	10			1245.51	1678.93	1839.86	1250.08	1138.36	1196.36	998.031	1077.45	763.509	748.843	820.213	1095.36	1149.57	704.305	716.784	794.538		0.784277	1.05719	1.15853	0.787154	0.716806	0.753328	0.628443	0.678452	0.480769	0.471534	0.516474	0.68973	0.723865	0.443489	0.451347	0.500307			1.05663	0.0878252	-0.392082	+	2.09517	0.00411581	-0.416548	+
179	P63010	AP2B1	AP-2 complex subunit beta OS=Homo sapiens OX=9606 GN=AP2B1 PE=1 SV=1	15			4179.41	5383.84	5610.9	3848.17	3530.88	3687.88	3056.44	3380.58	2413.23	2129.97	2588.82	3745.15	3687.46	2236.89	2191.56	2602.05		0.826289	1.06441	1.1093	0.760801	0.698071	0.729111	0.604272	0.668356	0.477107	0.421105	0.511822	0.740434	0.729028	0.442244	0.433282	0.514437			1.49521	0.027974	-0.444392	+	1.46128	0.00398774	-0.439864	+
180	Q96CW1	AP2M1	AP-2 complex subunit mu OS=Homo sapiens OX=9606 GN=AP2M1 PE=1 SV=2	11			1171.42	1554.86	1580.6	1048.5	985.837	1004.02	885.534	939.977	636.248	596.086	676.534	947.262	1021.91	585.128	572.553	674.67		0.815964	1.08305	1.10098	0.730343	0.686695	0.69936	0.616827	0.65475	0.443185	0.41521	0.471246	0.659825	0.711822	0.407577	0.398817	0.469948			1.57907	0.0130493	-0.49066	+	2.21108	0.001416	-0.521829	+
181	P53680	AP2S1	AP-2 complex subunit sigma OS=Homo sapiens OX=9606 GN=AP2S1 PE=1 SV=2	5			644.328	837.764	871.316	576.56	503.307	518.989	474.015	543.929	326.925	296.773	354.659	538.29	530.938	307.073	317.913	350.443		0.821355	1.06794	1.11071	0.734968	0.641589	0.66158	0.604249	0.693372	0.416747	0.378311	0.452101	0.686184	0.676812	0.39144	0.405259	0.446726		+	1.67178	0.00608955	-0.547641	+	1.8835	0.00105701	-0.642591	+
182	O00203	AP3B1	AP-3 complex subunit beta-1 OS=Homo sapiens OX=9606 GN=AP3B1 PE=1 SV=3	4			298.335	369.643	370.66	245.728	227.722	225.841	246.231	287.3	195.851	169.223	197.041	265.272	266.166	333.948	179.702	196.613		0.86171	1.06768	1.07061	0.70976	0.657752	0.652319	0.711213	0.829837	0.565696	0.488783	0.569133	0.766211	0.768793	0.964575	0.519051	0.567897		+	2.15535	0.00401899	-0.564506	+	1.57865	0.00203711	-0.508893
183	O14617	AP3D1	AP-3 complex subunit delta-1 OS=Homo sapiens OX=9606 GN=AP3D1 PE=1 SV=1	12			2489.03	3201.2	3165.03	1715.92	1532.58	1682.74	2916.42	2685.61	1366.56	1187.9	1401.86	2916.54	2714.67	1160.51	1087.26	1231.19		0.843238	1.08451	1.07225	0.581322	0.51921	0.570082	0.98803	0.909836	0.462966	0.402439	0.474925	0.98807	0.919681	0.39316	0.368344	0.417105		+	2.54077	0.000487218	-0.836886	+	2.711	0	-1.08929	+
184	Q9Y2T2	AP3M1	AP-3 complex subunit mu-1 OS=Homo sapiens OX=9606 GN=AP3M1 PE=1 SV=1	7			1592.99	1939.98	1972.41	1312.01	1141.3	1153.45	1211.26	1498.16	967.998	921.758	1025.97	1311.1	1489.5	1670	916.941	998.973		0.868055	1.05714	1.07481	0.714942	0.621919	0.62854	0.660042	0.81638	0.527483	0.502286	0.559073	0.714447	0.811661	0.910019	0.499661	0.544362		+	2.16485	0.00260175	-0.606442	+	1.46189	0.00322854	-0.472342
185	P53677	AP3M2	AP-3 complex subunit mu-2 OS=Homo sapiens OX=9606 GN=AP3M2 PE=2 SV=1	1			31.9034	37.0287	37.2011	19.2132	14.1025	16.2923	20.6648	24.017	14.7113	14.4257	14.742	23.0887	21.9027	14.6373	8.03518	13.207		0.901793	1.04667	1.05154	0.543087	0.398626	0.460524	0.584119	0.678873	0.415835	0.407762	0.416703	0.652634	0.61911	0.413743	0.227125	0.373314		+	2.7645	0	-1.10515	+	2.29509	0.00112783	-0.607116	+
186	Q92572	AP3S1	AP-3 complex subunit sigma-1 OS=Homo sapiens OX=9606 GN=AP3S1 PE=1 SV=1	8			3955.93	5024.33	4343.45	3026	2653.23	2827.18	1928.08	2254.44	1329.13	1286.94	1523.86	2295.92	2455.97	1222.94	1222.43	1383.79		0.890727	1.13129	0.977982	0.681342	0.597408	0.636575	0.434131	0.507615	0.29927	0.289771	0.343116	0.516955	0.552992	0.27536	0.275245	0.311578		+	2.30713	0.00165312	-0.642421	+	1.73514	0.00109369	-0.599248	+
187	Q9UPM8	AP4E1	AP-4 complex subunit epsilon-1 OS=Homo sapiens OX=9606 GN=AP4E1 PE=1 SV=2	1			124.279	157.143	157.217	101.217	84.2929	95.9739	91.5238	111.736	80.9671	69.9585	70.0797	110.833	103.239	58.8181	64.112	72.9352		0.849986	1.07475	1.07526	0.692257	0.576508	0.656398	0.625962	0.7642	0.553761	0.47847	0.479299	0.758024	0.706086	0.402277	0.438484	0.498828		+	2.00616	0.00195407	-0.63559	+	1.33497	0.00338924	-0.460474	+
188	P25054	APC	Adenomatous polyposis coli protein OS=Homo sapiens OX=9606 GN=APC PE=1 SV=2	8			1348.38	1751.12	1831.41	1156.65	1036.04	1038.11	818.198	940.793	702.089	635.152	712.182	873.754	902.553	528.89	561.322	628.711		0.820364	1.06539	1.11424	0.703714	0.630334	0.631593	0.497797	0.572385	0.427156	0.386431	0.433296	0.531598	0.54912	0.32178	0.341512	0.382512		+	1.8157	0.00352204	-0.599156	+	1.43587	0.00939113	-0.36283	+
189	P13798	APEH	Acylamino-acid-releasing enzyme OS=Homo sapiens OX=9606 GN=APEH PE=1 SV=4	5			1118.3	1405.56	1472.1	902.892	861.071	840.614	905.189	1021.2	746.74	675.762	718.869	1195.9	1159.67	898.184	839.414	871.446		0.839573	1.05524	1.10519	0.677854	0.646456	0.631098	0.679578	0.766674	0.560621	0.507334	0.539697	0.897832	0.870632	0.674319	0.630197	0.654245		+	2.06774	0.00267441	-0.607994	+	1.83609	0.00359411	-0.430923	+
190	P27695	APEX1	DNA-(apurinic or apyrimidinic site) lyase OS=Homo sapiens OX=9606 GN=APEX1 PE=1 SV=2	3			269.018	280.297	296.78	224.72	227.381	208.868	116.728	128.638	105.56	87.081	108.256	154.395	164.833	130.607	132.154	149.793		0.953857	0.993849	1.05229	0.79679	0.806225	0.740584	0.413883	0.456112	0.374284	0.308763	0.383843	0.547439	0.584449	0.463093	0.468579	0.531121			2.49839	0.0833543	-0.356074		0.913241	0.040231	-0.295587
191	Q9BZZ5	API5	Apoptosis inhibitor 5 OS=Homo sapiens OX=9606 GN=API5 PE=1 SV=3	5			1392.84	1733.09	1775.59	1281.32	1108.53	1074.46	1052.75	1122.72	762.801	724.53	808.599	1127.06	1203.43	759.926	811.885	771.865		0.852495	1.06075	1.08676	0.784238	0.678481	0.657629	0.644341	0.687166	0.466876	0.443452	0.494907	0.689823	0.736565	0.465117	0.496918	0.472424			1.66133	0.0111563	-0.496595	+	2.29548	0.00163544	-0.507916	+
192	Q9HDC9	APMAP	Adipocyte plasma membrane-associated protein OS=Homo sapiens OX=9606 GN=APMAP PE=1 SV=2	8			1000.3	1275.82	1307.69	990.906	859.498	913.673	796.068	835.169	577.326	488.093	560.374	909.149	947.905	548.667	597.543	627.541		0.837349	1.06799	1.09466	0.829485	0.719484	0.764834	0.666387	0.699118	0.483278	0.408582	0.469088	0.761047	0.793489	0.459288	0.500202	0.525313			1.2576	0.106245	-0.366914	+	2.02223	0.00114324	-0.593169	+
193	P04114	APOB	Apolipoprotein B-100 OS=Homo sapiens OX=9606 GN=APOB PE=1 SV=2	7			1020.77	1197.52	1290.95	1047.35	1033.19	1085.3	1304.54	1145.87	1072.18	1084.3	1131.9	1903.89	1994.04	1417.42	1484.26	1618.51		0.872642	1.02374	1.10362	0.895365	0.88326	0.927808	1.11523	0.979588	0.916592	0.926953	0.967645	1.62761	1.70468	1.21173	1.26887	1.38364			0.626166	0.572862	-0.142066		0.886423	0.267972	-0.157973	+
194	Q9UH17	APOBEC3B	DNA dC->dU-editing enzyme APOBEC-3B OS=Homo sapiens OX=9606 GN=APOBEC3B PE=1 SV=1	5			716.824	1174.03	1206.5	696.78	558.837	543.917	977.213	1415.13	1102.89	971.74	1083.29	365.52	450.139	242.908	227.98	258.007		0.694293	1.13713	1.16858	0.674879	0.541272	0.526821	0.946498	1.37065	1.06822	0.941197	1.04924	0.354031	0.435991	0.235273	0.220814	0.249897		+	1.3122	0.00151542	-0.753752		0.300378	0.313865	-0.162056	+
195	Q8IUX4	APOBEC3F	DNA dC->dU-editing enzyme APOBEC-3F OS=Homo sapiens OX=9606 GN=APOBEC3F PE=1 SV=3	4			432.846	592.654	615.225	334.629	305.042	323.348	650.073	789.055	562.177	516.847	558.966	728.768	814.98	526.676	438.449	483.965		0.791442	1.08364	1.12491	0.611856	0.557757	0.591229	1.18863	1.44276	1.02792	0.945034	1.02205	1.33252	1.49016	0.963006	0.801686	0.884911		+	1.98109	0.000611399	-0.7525	+	1.36897	0.0074794	-0.392523	+
196	Q9HC16	APOBEC3G	DNA dC->dU-editing enzyme APOBEC-3G OS=Homo sapiens OX=9606 GN=APOBEC3G PE=1 SV=1	1			51.6016	77.5227	72.4704	33.1876	33.9289	37.9702	100.07	102.496	68.5873	54.2681	67.4452	83.2917	106.505	57.7047	48.8978	44.7897		0.767901	1.15364	1.07846	0.493876	0.504908	0.565048	1.48918	1.52528	1.02067	0.807582	1.00368	1.23949	1.58494	0.858723	0.727665	0.666531		+	2.06594	0.000357782	-0.920467	+	1.77458	0.000547804	-0.682963	+
197	Q6UXV4	APOOL	MICOS complex subunit MIC27 OS=Homo sapiens OX=9606 GN=APOOL PE=1 SV=1	4			400.954	452.675	496.319	287.723	258.716	279.594	312.436	317.501	193.007	166.237	229.98	312.22	321.017	156.881	172.701	184.947		0.891043	1.00598	1.10297	0.639409	0.574947	0.621344	0.694329	0.705585	0.428921	0.36943	0.511086	0.693849	0.713399	0.348638	0.383795	0.411009		+	2.66627	0.00059	-0.704599	+	1.54355	0.00114524	-0.694027	+
198	P07741	APRT	Adenine phosphoribosyltransferase OS=Homo sapiens OX=9606 GN=APRT PE=1 SV=2	2			289.334	322.523	339.576	192.19	176.742	159.832	212.312	215.568	129.967	111.678	137.031	231.088	254.934	130.4	141.221	124.105		0.91231	1.01696	1.07073	0.606002	0.557292	0.503972	0.669449	0.679716	0.409804	0.352136	0.432078	0.728652	0.803842	0.411169	0.445289	0.39132		+	2.93126	0.000353357	-0.848379	+	2.16768	0.00054321	-0.7665	+
199	Q7Z2E3	APTX	Aprataxin OS=Homo sapiens OX=9606 GN=APTX PE=1 SV=2	6			2789.78	3232.01	3274.56	1789.54	1588.96	1728.27	2537.96	2180.48	1161.28	1087.21	1154.55	2200.07	2034.49	847.146	908.372	888.991		0.900282	1.04299	1.05672	0.577498	0.512769	0.557725	0.819018	0.703657	0.374754	0.350851	0.372582	0.709979	0.656545	0.27338	0.293138	0.286884		+	3.18019	0.000180392	-0.862295	+	2.86427	0	-1.05293	+
200	O60306	AQR	RNA helicase aquarius OS=Homo sapiens OX=9606 GN=AQR PE=1 SV=4	8			1884.59	2460.47	2650.41	1827.22	1597.41	1734.03	1095.99	1228.02	844.368	816.587	956.036	1046.85	1125.57	632.005	666.216	703.504		0.808204	1.05517	1.13663	0.783601	0.685048	0.743637	0.470014	0.526635	0.362106	0.350192	0.409995	0.448941	0.4827	0.271035	0.285706	0.301697			1.25427	0.0440301	-0.426629	+	1.50382	0.00523666	-0.414698	+
201	P10398	ARAF	Serine/threonine-protein kinase A-Raf OS=Homo sapiens OX=9606 GN=ARAF PE=1 SV=2	1			31.0375	34.143	41.1453	14.6814	21.4715	22.045	17.1566	23.7914	11.9002	9.94068	15.6125	22.2388	20.8457	8.83669	12.1883	10.271		0.875728	0.96335	1.16092	0.414238	0.605822	0.622003	0.484076	0.671278	0.335766	0.280478	0.440509	0.627471	0.588165	0.249329	0.343895	0.289798		+	1.77173	0.00043607	-0.883155	+	1.01451	0.00108427	-0.719567	+
202	Q96P48	ARAP1	Arf-GAP with Rho-GAP domain, ANK repeat and PH domain-containing protein 1 OS=Homo sapiens OX=9606 GN=ARAP1 PE=1 SV=3	6			528.575	613.67	631.126	355.035	308.935	324.082	541.325	599.17	357.862	318.646	425.978	509.44	516.419	275.698	299.348	297.169		0.894187	1.03814	1.06767	0.60061	0.522623	0.548247	0.915756	1.01361	0.605393	0.539051	0.720624	0.861816	0.873623	0.466396	0.506405	0.502719		+	2.98234	0.000347222	-0.841959	+	1.51289	0.00107671	-0.642351	+
203	Q8WWN8	ARAP3	Arf-GAP with Rho-GAP domain, ANK repeat and PH domain-containing protein 3 OS=Homo sapiens OX=9606 GN=ARAP3 PE=1 SV=1	1			19.3835	24.5354	21.0854	14.2328	13.7409	14.0368	15.0909	17.6921	9.8071	10.6457	10.9716	15.9684	23.1402	9.95146	10.0397	10.0893		0.894564	1.13233	0.973108	0.656855	0.634153	0.647809	0.696457	0.816504	0.452605	0.491307	0.506348	0.736954	1.06794	0.459268	0.46334	0.465629		+	2.46177	0.00174403	-0.623009	+	2.04777	0.00109848	-0.643078	+
204	P48444	ARCN1	Coatomer subunit delta OS=Homo sapiens OX=9606 GN=ARCN1 PE=1 SV=1	15			2592.74	3202.84	3227.37	1992.1	1777.1	1787.11	1662.62	1899.73	1167.21	1073.19	1234.3	1763.89	1806.12	910.292	912.127	973.888		0.862048	1.0649	1.07305	0.662344	0.59086	0.594188	0.552797	0.631633	0.38808	0.35682	0.410387	0.586468	0.600509	0.302659	0.303269	0.323804		+	2.39904	0.000844904	-0.694248	+	2.02208	0.00113031	-0.620072	+
205	O15033	AREL1	Apoptosis-resistant E3 ubiquitin protein ligase 1 OS=Homo sapiens OX=9606 GN=AREL1 PE=1 SV=3	2			1122.96	1466.34	1392.32	1126.45	1041.58	1389.61	714.486	913.102	694.743	630.626	780.123	1103.76	918.795	669.504	756.277	813.459		0.846108	1.10483	1.04906	0.848737	0.784791	1.04702	0.538338	0.687988	0.523463	0.475153	0.587793	0.831641	0.692277	0.504446	0.569826	0.612911			0.40618	0.536133	-0.163927		0.496204	0.179951	-0.208186	+
206	P84077	ARF1	ADP-ribosylation factor 1 OS=Homo sapiens OX=9606 GN=ARF1 PE=1 SV=2	7			1589.62	1911.29	2020.42	1338.57	1434.96	1315.52	1284.39	1393.87	990.305	900.153	1074.63	1531.91	1681.8	1195.85	1098.42	1163.6		0.863716	1.03849	1.09779	0.727308	0.779682	0.714784	0.69787	0.757356	0.53808	0.489096	0.583897	0.832359	0.913802	0.649762	0.596824	0.632239			1.73123	0.0320631	-0.426849	+	1.60778	0.00354949	-0.440747	+
207	P18085	ARF4	ADP-ribosylation factor 4 OS=Homo sapiens OX=9606 GN=ARF4 PE=1 SV=3	4			994.736	1196.41	1238.5	754.411	737.703	704.145	1055.8	1216.19	749.083	737.113	867.359	1052.32	1124.98	796.007	701.848	746.233		0.870121	1.04653	1.08335	0.659903	0.645288	0.615934	0.923536	1.06383	0.655242	0.644772	0.758701	0.920492	0.984049	0.696288	0.613925	0.652749		+	2.46825	0.00161201	-0.637071	+	1.64964	0.00163961	-0.534401	+
208	P62330	ARF6	ADP-ribosylation factor 6 OS=Homo sapiens OX=9606 GN=ARF6 PE=1 SV=2	4			616.681	785.149	843.106	512.292	546.667	503.838	557.411	643.912	431.913	416.202	501.947	624.011	708.711	476.553	437.964	473.448		0.824096	1.04923	1.12668	0.684597	0.730534	0.673299	0.744891	0.860486	0.577183	0.556188	0.670772	0.833891	0.94708	0.636837	0.585269	0.632688			1.65008	0.0100239	-0.510872	+	1.29567	0.00551709	-0.417616	+
209	Q9Y6D6	ARFGEF1	Brefeldin A-inhibited guanine nucleotide-exchange protein 1 OS=Homo sapiens OX=9606 GN=ARFGEF1 PE=1 SV=2	2			616.71	785.651	844.856	617.376	611.544	644.929	470.569	542.656	438.93	416.318	508.107	525.523	548.965	328.87	349.026	441.457		0.823298	1.04883	1.12787	0.824187	0.816402	0.86097	0.628202	0.724437	0.585965	0.555778	0.678315	0.701565	0.73286	0.439036	0.465944	0.589338			0.831617	0.348393	-0.249813		0.487786	0.293006	-0.158286	+
210	Q9Y6D5	ARFGEF2	Brefeldin A-inhibited guanine nucleotide-exchange protein 2 OS=Homo sapiens OX=9606 GN=ARFGEF2 PE=1 SV=3	2			177.255	224.616	227.883	161.903	164.674	177.093	115.095	122.861	102.645	97.4398	121.854	130.141	138.499	83.4659	96.715	107.35		0.844401	1.07002	1.08558	0.771268	0.784468	0.843629	0.548286	0.585281	0.488977	0.46418	0.580484	0.619961	0.659777	0.397612	0.460728	0.51139			1.19057	0.20223	-0.31411		0.493088	0.302055	-0.154793	+
211	Q07960	ARHGAP1	Rho GTPase-activating protein 1 OS=Homo sapiens OX=9606 GN=ARHGAP1 PE=1 SV=1	1			65.346	94.1012	82.9542	50.4076	48.448	41.8245	44.6551	59.9976	30.1873	26.4948	41.0885	52.3216	56.0359	43.0219	35.4106	33.6758		0.808733	1.16461	1.02665	0.623853	0.5996	0.517627	0.552659	0.74254	0.373603	0.327904	0.508518	0.647541	0.69351	0.532446	0.438247	0.416777		+	1.94155	0.000662921	-0.7734	+	1.01446	0.00112821	-0.692403	+
212	Q8IWW6	ARHGAP12	Rho GTPase-activating protein 12 OS=Homo sapiens OX=9606 GN=ARHGAP12 PE=1 SV=1	1			149.451	187.489	202.374	126.678	128.823	126.384	86.2311	113.609	71.9517	67.1871	71.5849	99.8382	106.116	74.5391	64.3165	68.7092		0.831339	1.04293	1.12573	0.704662	0.716594	0.703026	0.479671	0.631964	0.40024	0.373736	0.3982	0.555362	0.590283	0.414633	0.357768	0.382203			1.67948	0.0130477	-0.486377	+	1.31386	0.00302139	-0.495484	+
213	Q8N392	ARHGAP18	Rho GTPase-activating protein 18 OS=Homo sapiens OX=9606 GN=ARHGAP18 PE=1 SV=3	3			585.9	852.525	851.03	569.94	513.315	506.412	360.533	441.514	282.631	266.268	284.704	459.807	461.321	277.224	283.092	268.023		0.767737	1.11711	1.11515	0.746824	0.672625	0.66358	0.472426	0.57854	0.370347	0.348906	0.373063	0.602511	0.604495	0.363262	0.370951	0.351205			1.2662	0.0137121	-0.50688	+	1.69086	0.00158227	-0.522541	+
214	Q9P227	ARHGAP23	Rho GTPase-activating protein 23 OS=Homo sapiens OX=9606 GN=ARHGAP23 PE=1 SV=2	2			132.29	170.063	189.242	105.303	85.6871	104.16	128.163	129.859	84.101	76.1782	95.6217	123.625	119.685	56.8731	54.5483	60.9389		0.807311	1.03782	1.15487	0.64262	0.522913	0.635645	0.782126	0.792476	0.513233	0.464884	0.583539	0.754432	0.730388	0.347073	0.332886	0.371885		+	1.79711	0.00089548	-0.726503	+	1.79173	0.00112969	-0.603111	+
215	Q9NRY4	ARHGAP35	Rho GTPase-activating protein 35 OS=Homo sapiens OX=9606 GN=ARHGAP35 PE=1 SV=3	8			914.233	1127.11	1225.21	704.478	642.904	679.314	758.592	760.644	484.487	423.421	519.813	697.281	706.772	373.267	373.593	424.318		0.839631	1.03514	1.12523	0.646992	0.590443	0.623882	0.69669	0.698575	0.444953	0.38887	0.477396	0.640382	0.649099	0.342808	0.343108	0.389693		+	2.17663	0.001375	-0.678946	+	2.04597	0.00057349	-0.679758	+
216	Q9C0H5	ARHGAP39	Rho GTPase-activating protein 39 OS=Homo sapiens OX=9606 GN=ARHGAP39 PE=1 SV=2	2			386.48	521.26	579.805	347.353	286.749	343.151	208.386	228.673	138.624	154.144	178.061	192.235	193.59	115.944	109.614	125.81		0.779432	1.05125	1.16932	0.700523	0.5783	0.692048	0.420262	0.461175	0.279569	0.310869	0.359104	0.387689	0.390422	0.23383	0.221064	0.253727		+	1.40067	0.00480429	-0.590977	+	1.35831	0.0031876	-0.483663	+
217	P98171	ARHGAP4	Rho GTPase-activating protein 4 OS=Homo sapiens OX=9606 GN=ARHGAP4 PE=1 SV=2	9			1948.53	2578.81	2669.05	1551.38	1422.68	1527.63	1860.38	1740.79	1028.82	974.59	1095.71	1509.11	1519.57	718.313	759.147	783.291		0.812295	1.07504	1.11266	0.646733	0.593081	0.636832	0.775547	0.725693	0.42889	0.406283	0.456775	0.629111	0.633472	0.299447	0.31647	0.326535		+	1.9529	0.00161387	-0.663987	+	2.80206	0.000192846	-0.802429	+
218	P52565	ARHGDIA	Rho GDP-dissociation inhibitor 1 OS=Homo sapiens OX=9606 GN=ARHGDIA PE=1 SV=3	8			427.544	542.448	608.278	409.61	423.02	430.906	296.59	307.971	275.694	255.679	288.612	372.481	417.646	339.485	346.171	353.889		0.812682	1.03109	1.15622	0.778593	0.804083	0.819073	0.563763	0.585396	0.524043	0.485999	0.548598	0.708018	0.793868	0.645298	0.658007	0.672678			0.946002	0.237264	-0.30598		0.911107	0.300625	-0.146788
219	Q92888	ARHGEF1	Rho guanine nucleotide exchange factor 1 OS=Homo sapiens OX=9606 GN=ARHGEF1 PE=1 SV=2	13			3247.98	4235.05	4381.15	2707.44	2556.38	2560.41	2405.04	2738.77	1883.52	1717.64	2074.42	2323.28	2415.38	1446.22	1454.63	1567.66		0.821291	1.07088	1.10783	0.684609	0.646411	0.64743	0.608143	0.692531	0.476271	0.434326	0.524542	0.587469	0.610758	0.365694	0.367821	0.396402		+	1.87344	0.00375876	-0.588608	+	1.43642	0.00383346	-0.444272	+
220	Q92974	ARHGEF2	Rho guanine nucleotide exchange factor 2 OS=Homo sapiens OX=9606 GN=ARHGEF2 PE=1 SV=4	8			920.85	1105.86	1142.37	662.526	625.768	594.583	984.935	948.043	592.662	573.522	655.21	903.128	895.458	500.424	491.495	479.868		0.87172	1.04686	1.08142	0.627178	0.592381	0.56286	0.932386	0.897462	0.561042	0.542923	0.620253	0.854943	0.847683	0.473725	0.465272	0.454266		+	2.65623	0.000627931	-0.746179	+	2.4948	0.000417457	-0.672819	+
221	Q15052	ARHGEF6	Rho guanine nucleotide exchange factor 6 OS=Homo sapiens OX=9606 GN=ARHGEF6 PE=1 SV=2	2			313.727	393.773	444.539	322.895	301.548	307.763	221.688	263.58	208.284	193.172	252.131	292.072	323.969	197.696	219.905	238.344		0.81697	1.02542	1.15761	0.840844	0.785255	0.801439	0.577293	0.686383	0.542388	0.503035	0.656569	0.760578	0.843641	0.514816	0.57265	0.620666			0.904716	0.2689	-0.291304		0.367551	0.306567	-0.159182	+
222	Q14155	ARHGEF7	Rho guanine nucleotide exchange factor 7 OS=Homo sapiens OX=9606 GN=ARHGEF7 PE=1 SV=2	4			871.723	1145.79	1109.94	741.109	716.229	710.991	677.585	754.657	528.719	451.955	576.37	836.206	836.446	462.287	484.92	568.658		0.836198	1.0991	1.06471	0.710907	0.687041	0.682016	0.649971	0.723902	0.507172	0.433536	0.552881	0.802128	0.802358	0.443447	0.465158	0.545483		+	1.83401	0.00812003	-0.518204	+	1.32201	0.00334222	-0.469553	+
223	O14497	ARID1A	AT-rich interactive domain-containing protein 1A OS=Homo sapiens OX=9606 GN=ARID1A PE=1 SV=3	6			993.233	1144.52	1239.49	759.405	711.139	761.317	654.185	717.459	499.712	435.689	562.528	596.159	591.174	397.886	363.226	397.724		0.882287	1.01668	1.10104	0.674578	0.631704	0.676277	0.581112	0.637318	0.443893	0.387022	0.499693	0.529567	0.525139	0.353442	0.322653	0.353298		+	2.40903	0.00266538	-0.592326	+	1.29865	0.00340541	-0.464191	+
224	Q8NFD5	ARID1B	AT-rich interactive domain-containing protein 1B OS=Homo sapiens OX=9606 GN=ARID1B PE=1 SV=2	1			46.7249	50.7178	61.2421	30.1542	27.988	34.2067	26.4029	30.0534	22.5447	20.8344	23.0066	32.8863	36.0851	20.5059	18.3888	20.1774		0.883353	0.95884	1.15781	0.570077	0.529124	0.646691	0.499157	0.568172	0.426217	0.393883	0.434949	0.621729	0.682203	0.387672	0.347648	0.381462		+	2.25203	0.000536998	-0.776587		1.52466	0.0115971	-0.349511	+
225	Q68CP9	ARID2	AT-rich interactive domain-containing protein 2 OS=Homo sapiens OX=9606 GN=ARID2 PE=1 SV=2	10			1523.51	1831.84	1807.2	878.153	825.862	833.143	1349.91	1455.74	610.045	570.316	590.148	1550.13	1500.22	490.133	563.333	526.138		0.885324	1.0645	1.05018	0.510302	0.479915	0.484146	0.784444	0.845942	0.354502	0.331415	0.34294	0.900793	0.87179	0.28482	0.327357	0.305743		+	3.46371	0	-1.02043	+	3.74234	0	-1.24865	+
226	Q9Y4X5	ARIH1	E3 ubiquitin-protein ligase ARIH1 OS=Homo sapiens OX=9606 GN=ARIH1 PE=1 SV=2	6			865.096	1099.77	1198.69	715.797	644.028	635.231	515.071	600.631	414.727	376.288	490.374	494.945	547.309	295.109	304.251	328.617		0.82037	1.04291	1.13672	0.67879	0.610732	0.60239	0.488442	0.569578	0.393286	0.356834	0.465022	0.469356	0.519013	0.279852	0.288521	0.311627		+	1.90897	0.00176413	-0.653807	+	0.99732	0.00869694	-0.389664	+
227	P40616	ARL1	ADP-ribosylation factor-like protein 1 OS=Homo sapiens OX=9606 GN=ARL1 PE=1 SV=1	3			185.735	228.422	259.861	162.747	150.927	154.266	141.304	165.889	111.755	109.005	138.514	170.505	165.641	118.13	113.163	133.354		0.826692	1.01669	1.15662	0.724374	0.671764	0.686626	0.628933	0.738359	0.497413	0.485173	0.616515	0.758904	0.737255	0.525787	0.503679	0.593548		+	1.62261	0.00974683	-0.513595		0.933986	0.0138519	-0.362922	+
228	P36404	ARL2	ADP-ribosylation factor-like protein 2 OS=Homo sapiens OX=9606 GN=ARL2 PE=1 SV=4	4			1236.02	1483.54	1563.02	870.733	736.537	709.48	1048.42	1208.82	737.729	682.452	831.283	751.832	840.816	440.462	401.323	459.781		0.865847	1.03924	1.09491	0.609959	0.515953	0.496999	0.734431	0.846793	0.516788	0.478066	0.582324	0.526668	0.589002	0.308549	0.281132	0.322082		+	2.5283	0.00017037	-0.885039	+	1.68514	0.0010457	-0.589783	+
229	Q96KC2	ARL5B	ADP-ribosylation factor-like protein 5B OS=Homo sapiens OX=9606 GN=ARL5B PE=1 SV=1	1			117.738	142.064	143.179	110.848	84.0361	86.8123	100.04	109.872	69.7275	62.0715	72.7993	104.448	121.934	65.9526	67.962	62.4349		0.876503	1.0576	1.0659	0.82521	0.625608	0.646276	0.74475	0.817944	0.519088	0.462093	0.541956	0.777565	0.90774	0.490985	0.505944	0.464798		+	1.54083	0.00921567	-0.522102	+	2.0558	0.00115224	-0.623601	+
230	Q66PJ3	ARL6IP4	ADP-ribosylation factor-like protein 6-interacting protein 4 OS=Homo sapiens OX=9606 GN=ARL6IP4 PE=1 SV=2	3			987.223	993.613	760.258	578.379	694.563	720.1	524.059	523.998	404.716	362.929	402.498	603.119	635.749	578.994	422.571	419.568		1.08047	1.08746	0.832067	0.633009	0.760167	0.788116	0.573558	0.573491	0.442943	0.397209	0.440515	0.660086	0.695798	0.633682	0.462484	0.459198			1.32798	0.0267819	-0.45541	+	2.12726	0.00350039	-0.427786	+
231	O75915	ARL6IP5	PRA1 family protein 3 OS=Homo sapiens OX=9606 GN=ARL6IP5 PE=1 SV=1	1			106.344	118.374	116.4	66.9787	55.7248	66.623	74.3719	83.3001	37.1502	43.8024	44.3858	109.162	100.943	48.5214	56.8637	53.9773		0.935254	1.04105	1.02369	0.589052	0.490078	0.585923	0.654072	0.732592	0.326722	0.385225	0.390356	0.960037	0.887754	0.426727	0.500094	0.474709		+	2.99188	0.00016819	-0.852975	+	2.30522	0.000237094	-0.918379	+
232	Q9NVJ2	ARL8B	ADP-ribosylation factor-like protein 8B OS=Homo sapiens OX=9606 GN=ARL8B PE=1 SV=1	3			561.074	830.499	819.65	597.676	535.31	610.194	487.434	511.69	370.563	306.26	373.46	728.817	718.36	421.482	526.833	529.259		0.761218	1.12675	1.11203	0.810876	0.726263	0.82786	0.661309	0.694218	0.502748	0.415508	0.506679	0.988797	0.97461	0.571831	0.714762	0.718054			0.763209	0.2265	-0.322724	+	1.60693	0.00178248	-0.518429	+
233	Q9NVT9	ARMC1	Armadillo repeat-containing protein 1 OS=Homo sapiens OX=9606 GN=ARMC1 PE=1 SV=1	2			258.339	357.406	346.02	187.178	171.375	175.091	196.471	231.02	131.953	109.152	141.404	194.219	209.643	115.484	100.391	121.212		0.805828	1.11484	1.07933	0.583858	0.534564	0.546155	0.612845	0.720613	0.411596	0.340474	0.441077	0.605821	0.653932	0.360225	0.313146	0.378092		+	2.25524	0.000444444	-0.836004	+	1.67498	0.000450358	-0.749105	+
234	Q8N2F6	ARMC10	Armadillo repeat-containing protein 10 OS=Homo sapiens OX=9606 GN=ARMC10 PE=1 SV=1	1			243.633	302.793	320.13	149.593	161.68	155.669	173.749	196.451	114.776	105.947	123.636	158.577	168.562	79.0215	92.3655	95.451		0.843453	1.04826	1.10828	0.517888	0.559733	0.538923	0.601516	0.68011	0.397352	0.366786	0.428025	0.54899	0.583558	0.273571	0.319768	0.33045		+	2.68093	0.000176923	-0.883011	+	2.13099	0.000596623	-0.6895	+
235	Q6NXE6	ARMC6	Armadillo repeat-containing protein 6 OS=Homo sapiens OX=9606 GN=ARMC6 PE=1 SV=2	1			865.119	1069.38	1104.45	642.649	585.436	648.036	339.451	404.206	259.529	248.498	301.776	329.631	347.738	168.546	183.361	209.785		0.854031	1.05567	1.09029	0.634412	0.577933	0.63973	0.3351	0.399025	0.256203	0.245313	0.297908	0.325406	0.343281	0.166386	0.181011	0.207096		+	2.34018	0.000896113	-0.68908	+	1.30631	0.00345182	-0.461611	+
236	Q8IUR7	ARMC8	Armadillo repeat-containing protein 8 OS=Homo sapiens OX=9606 GN=ARMC8 PE=1 SV=2	2			422.802	536.501	590.156	348.776	320.272	336.148	276.781	311.658	211.953	200.202	224.752	314.132	321.7	161.982	196.73	193.449		0.818612	1.03875	1.14264	0.675286	0.620098	0.650836	0.535892	0.60342	0.410375	0.387623	0.435156	0.60821	0.622863	0.313623	0.380901	0.374548		+	1.84458	0.0030983	-0.611322	+	1.87624	0.00291473	-0.469843	+
237	Q9UH62	ARMCX3	Armadillo repeat-containing X-linked protein 3 OS=Homo sapiens OX=9606 GN=ARMCX3 PE=1 SV=1	2			271.68	366.513	380.993	232.729	197.535	232.958	189.479	214.909	135.5	118.37	150.842	203.644	199.21	108.168	102.882	137.607		0.799697	1.07884	1.12146	0.685044	0.581449	0.685718	0.557736	0.63259	0.398848	0.348425	0.444007	0.599431	0.58638	0.318395	0.302836	0.40505		+	1.60807	0.00364643	-0.608236	+	1.5517	0.00111452	-0.588004	+
238	O15143	ARPC1B	Actin-related protein 2/3 complex subunit 1B OS=Homo sapiens OX=9606 GN=ARPC1B PE=1 SV=3	3			378.068	477.314	494.527	333.814	277.805	289.982	377.384	367.155	299.719	290.874	328.897	327.548	346.62	220.193	224.917	243.117		0.840208	1.06077	1.09902	0.741859	0.617386	0.644448	0.838688	0.815955	0.666087	0.64643	0.730931	0.727934	0.770319	0.489351	0.499849	0.540296		+	1.77953	0.00417332	-0.576851		1.55485	0.036594	-0.282331	+
239	O15144	ARPC2	Actin-related protein 2/3 complex subunit 2 OS=Homo sapiens OX=9606 GN=ARPC2 PE=1 SV=1	5			824.082	1018.79	984.89	706.119	678.537	677.698	581.865	572.372	430.648	463.02	510.764	670.435	660.064	475.552	505.069	550.078		0.874277	1.08084	1.04488	0.749128	0.719866	0.718976	0.617306	0.607235	0.456879	0.491222	0.541874	0.711271	0.700268	0.504518	0.535833	0.583583			2.01154	0.0186801	-0.449518		1.34028	0.025854	-0.305405	+
240	O15145	ARPC3	Actin-related protein 2/3 complex subunit 3 OS=Homo sapiens OX=9606 GN=ARPC3 PE=1 SV=3	2			523.904	700.666	722.112	425.561	339.304	391.425	374.028	383.178	223.717	209.39	251.082	336.613	326.283	152.157	183.69	175.938		0.80738	1.07978	1.11284	0.655825	0.522896	0.603219	0.576408	0.590509	0.344767	0.322688	0.386938	0.518749	0.502829	0.234487	0.283082	0.271135		+	1.87346	0.000633413	-0.743191	+	2.28816	0.000507497	-0.735238	+
241	P59998	ARPC4	Actin-related protein 2/3 complex subunit 4 OS=Homo sapiens OX=9606 GN=ARPC4 PE=1 SV=3	2			769.399	939.491	930.985	680.05	620.684	581.769	512.686	525.872	434.595	451.761	511.299	599.661	576.847	449.86	455.727	544.688		0.874358	1.06765	1.05799	0.772821	0.705356	0.661132	0.582625	0.59761	0.493881	0.513389	0.581049	0.681465	0.655539	0.511229	0.517896	0.618993			1.87636	0.0117768	-0.484808		0.740879	0.269291	-0.159927
242	O15511	ARPC5	Actin-related protein 2/3 complex subunit 5 OS=Homo sapiens OX=9606 GN=ARPC5 PE=1 SV=3	1			82.2555	97.113	102.233	43.5185	36.3694	38.2511	55.6788	51.7597	30.4475	20.4885	36.2874	69.6704	64.6293	25.1218	19.5931	23.4963		0.876297	1.03458	1.08912	0.463618	0.387456	0.407502	0.593166	0.551414	0.324368	0.218271	0.386582	0.742223	0.688519	0.267631	0.208732	0.250314		+	3.29176	0	-1.25124	+	1.20864	0.000380952	-0.924276	+
243	Q8N5I2	ARRDC1	Arrestin domain-containing protein 1 OS=Homo sapiens OX=9606 GN=ARRDC1 PE=1 SV=1	2			188.202	245.816	274.192	158.808	133.563	152.938	138.271	156.209	99.2323	93.2473	116.339	200.062	219.667	140.901	134.842	132.586		0.79723	1.04128	1.16149	0.672716	0.565777	0.64785	0.58572	0.661706	0.420351	0.394999	0.492816	0.847469	0.930516	0.596861	0.571195	0.561638		+	1.6736	0.00203201	-0.655765	+	1.47634	0.00182744	-0.520038	+
244	Q9ULH1	ASAP1	Arf-GAP with SH3 domain, ANK repeat and PH domain-containing protein 1 OS=Homo sapiens OX=9606 GN=ASAP1 PE=1 SV=4	3			659.079	781.647	812.521	457.813	399.352	397.202	526.601	544.872	353.059	326.97	380.28	551.284	578.325	290.842	295.354	325.499		0.877506	1.04069	1.0818	0.609538	0.531702	0.528839	0.701123	0.725449	0.470067	0.435332	0.506309	0.733986	0.769989	0.387231	0.393238	0.433373		+	2.74117	0.000530278	-0.84236	+	2.26444	0.00109815	-0.602604	+
245	Q9NWX5	ASB6	Ankyrin repeat and SOCS box protein 6 OS=Homo sapiens OX=9606 GN=ASB6 PE=1 SV=1	2			349.523	403.353	454.086	288.119	247.918	233.472	245.874	267.752	164.106	155.988	179.265	260.147	249.401	148.271	141.967	148.606		0.868767	1.00257	1.12867	0.716143	0.61622	0.580313	0.611139	0.665519	0.407899	0.387721	0.445577	0.646616	0.619906	0.368539	0.35287	0.369372		+	1.98797	0.00174973	-0.646873	+	2.23744	0.0010677	-0.626689	+
246	Q9H1I8	ASCC2	Activating signal cointegrator 1 complex subunit 2 OS=Homo sapiens OX=9606 GN=ASCC2 PE=1 SV=3	2			208.708	259.864	278.321	171.355	174.421	181.563	147.578	144.324	90.7836	80.9962	102.666	169.206	156.276	77.0587	105.05	103.823		0.838305	1.04378	1.11792	0.688271	0.700586	0.729273	0.592768	0.579697	0.364645	0.325333	0.412372	0.67964	0.627704	0.309517	0.421948	0.41702			1.73917	0.0114858	-0.491987	+	1.88572	0.00055643	-0.680598	+
247	Q8N3C0	ASCC3	Activating signal cointegrator 1 complex subunit 3 OS=Homo sapiens OX=9606 GN=ASCC3 PE=1 SV=3	12			3978.21	5069.35	5221.13	3319.48	3022.13	3307.56	2473.98	2804.57	1776.16	1687.57	2013.84	3060.89	2981.75	1550.24	1728.55	1876.73		0.836421	1.06583	1.09775	0.697923	0.635405	0.695416	0.520156	0.589662	0.373439	0.354813	0.423411	0.643554	0.626915	0.325939	0.363429	0.394584		+	1.86676	0.00507604	-0.555331	+	1.68445	0.00164045	-0.532754	+
248	Q9Y294	ASF1A	Histone chaperone ASF1A OS=Homo sapiens OX=9606 GN=ASF1A PE=1 SV=1	3			671.955	881.436	916.91	488.756	433.901	422.941	493.283	448.188	259.049	194.261	239.291	520.158	530.196	219.225	243.578	218.757		0.81604	1.07044	1.11352	0.593558	0.526941	0.513631	0.599056	0.544292	0.314596	0.235916	0.290601	0.631694	0.643884	0.266233	0.295808	0.265664		+	2.29898	0.000511848	-0.866021	+	2.06734	0	-1.0366	+
249	Q9UBL3	ASH2L	Set1/Ash2 histone methyltransferase complex subunit ASH2 OS=Homo sapiens OX=9606 GN=ASH2L PE=1 SV=1	3			394.907	490.44	523.409	302.342	284.586	279.393	311.892	318.092	192.846	186.767	205.168	326.835	349.301	171.716	165.958	187.258		0.84097	1.04441	1.11462	0.643849	0.606037	0.594978	0.664186	0.677389	0.410673	0.397727	0.436913	0.696008	0.74385	0.365676	0.353414	0.398773		+	2.25178	0.000888577	-0.692062	+	3.02921	0.000488889	-0.693414	+
250	O95671	ASMTL	N-acetylserotonin O-methyltransferase-like protein OS=Homo sapiens OX=9606 GN=ASMTL PE=1 SV=3	1			189.713	225.101	259.472	165.584	152.989	145.489	99.0264	110.463	81.7505	72.8506	80.4792	100.735	101.98	60.2588	62.3365	61.9818		0.844062	1.00151	1.15443	0.736708	0.680671	0.647302	0.440583	0.491467	0.36372	0.324123	0.358064	0.448185	0.453724	0.2681	0.277344	0.275766		+	1.69727	0.00755153	-0.529356	+	1.7359	0.00444929	-0.418391	+
251	O43681	ASNA1	ATPase ASNA1 OS=Homo sapiens OX=9606 GN=ASNA1 PE=1 SV=2	1			106.912	157.142	161.931	121.409	96.8877	118.844	80.9223	84.5481	72.513	51.7084	66.7855	113.226	114.843	77.8178	83.508	81.1441		0.752928	1.10667	1.1404	0.855023	0.682332	0.836959	0.569895	0.59543	0.510673	0.364156	0.470337	0.797394	0.808782	0.548032	0.588105	0.571457			0.662526	0.245368	-0.320181	+	0.87774	0.00949017	-0.392097	+
252	P08243	ASNS	Asparagine synthetase [glutamine-hydrolyzing] OS=Homo sapiens OX=9606 GN=ASNS PE=1 SV=4	14			6065.88	7479.43	7460.94	4849.44	4269.74	4507.08	1605.26	1886.8	1279.87	1154.37	1433.76	2225.89	2386.94	1354.08	1315.74	1509.79		0.866296	1.06817	1.06553	0.692571	0.609781	0.643677	0.229255	0.269463	0.182784	0.164861	0.204762	0.31789	0.34089	0.193382	0.187907	0.21562		+	2.26299	0.00209701	-0.619614	+	1.24433	0.00448072	-0.438405	+
253	Q12797	ASPH	Aspartyl/asparaginyl beta-hydroxylase OS=Homo sapiens OX=9606 GN=ASPH PE=1 SV=3	16			4252.91	5748.02	5578.61	3337.19	3011.96	3417.78	4574.08	4564.67	2429.72	2105	2636.43	8344.36	4756.51	2390.37	3002.75	3100.13		0.818941	1.10684	1.07422	0.64261	0.579984	0.658129	0.880786	0.878974	0.467867	0.405339	0.507672	1.60679	0.915915	0.46029	0.57821	0.596962		+	1.94758	0.00160368	-0.663008	+	2.33817	0.000253061	-0.940931	+
254	Q8IZT6	ASPM	Abnormal spindle-like microcephaly-associated protein OS=Homo sapiens OX=9606 GN=ASPM PE=1 SV=2	5			391.959	486.085	512.841	331.326	283.689	279.758	316.261	331.257	234.4	213.425	242.357	329.486	353.817	179.617	193.909	182.379		0.845416	1.04844	1.10615	0.714637	0.611889	0.60341	0.682143	0.714488	0.505577	0.460336	0.52274	0.710668	0.763148	0.387416	0.418242	0.393373		+	1.94747	0.00222628	-0.631227	+	2.1469	0.00177395	-0.494588	+
255	Q9BZE9	ASPSCR1	Tether containing UBX domain for GLUT4 OS=Homo sapiens OX=9606 GN=ASPSCR1 PE=1 SV=1	4			268.841	278.498	308.155	184.665	159.612	157.185	254.653	210.223	135.128	138.767	141.174	213.999	238.675	111.711	126.79	105.722		0.942757	0.976622	1.08062	0.647573	0.559719	0.551208	0.893003	0.737199	0.47386	0.486621	0.495061	0.75044	0.836973	0.391742	0.44462	0.37074		+	2.9093	0.000394641	-0.772044	+	2.22555	0.000509849	-0.742071	+
256	Q8NBU5	ATAD1	ATPase family AAA domain-containing protein 1 OS=Homo sapiens OX=9606 GN=ATAD1 PE=1 SV=1	1			86.3096	123.003	130.346	68.0423	54.7714	61.7058	77.238	70.5611	47.1651	34.0825	42.2865	49.6374	54.2831	24.9258	30.4899	25.7773		0.762321	1.08641	1.15127	0.600977	0.483763	0.54501	0.682197	0.623224	0.416581	0.30103	0.373491	0.438417	0.47945	0.220155	0.269299	0.227675		+	1.85447	0.000419689	-0.863052	+	1.72428	0.000174648	-0.855109	+
257	Q6PL18	ATAD2	ATPase family AAA domain-containing protein 2 OS=Homo sapiens OX=9606 GN=ATAD2 PE=1 SV=1	4			460.841	552.406	621.301	346.307	318.129	335.056	327.656	377.805	254.346	243.273	277.218	266.101	291.696	135.707	124.416	140.758		0.845814	1.01387	1.14032	0.635601	0.583884	0.614952	0.60137	0.693412	0.466819	0.446496	0.508798	0.488394	0.53537	0.249073	0.228349	0.258343		+	2.23572	0.000829587	-0.699742	+	1.63025	0.00341491	-0.448115	+
258	Q9NVI7	ATAD3A	ATPase family AAA domain-containing protein 3A OS=Homo sapiens OX=9606 GN=ATAD3A PE=1 SV=2	14			3064.82	4209.48	4508.65	3614.29	3269.55	3268.03	2198.92	3055.2	2850.49	2814.24	2866.56	1315.13	1704	949.826	1152.32	1376.63		0.780319	1.07176	1.14793	0.920217	0.832444	0.832057	0.559856	0.77787	0.725749	0.71652	0.729841	0.334839	0.433847	0.241831	0.293387	0.350497			0.480149	0.460151	-0.196971		0.296623	0.399221	0.133728
259	Q5T9A4	ATAD3B	ATPase family AAA domain-containing protein 3B OS=Homo sapiens OX=9606 GN=ATAD3B PE=1 SV=1	15			1824.74	2622.69	2691.44	2140.1	1911.38	1903	1151.19	1603.15	1418.4	1390.34	1532.83	754.799	918.731	513.588	589.769	722.527		0.766819	1.10215	1.13104	0.899344	0.803228	0.799706	0.48377	0.673699	0.596061	0.584269	0.644148	0.317193	0.386083	0.215827	0.247841	0.303631			0.568744	0.380889	-0.242183		0.178768	0.579232	0.0899489	+
260	Q96QE3	ATAD5	ATPase family AAA domain-containing protein 5 OS=Homo sapiens OX=9606 GN=ATAD5 PE=1 SV=4	2			436.284	673.022	539.207	258.161	229.462	279.259	391.369	405.511	209.357	182.129	198.791	370.809	332.661	153.962	132.15	132.645		0.793959	1.22478	0.981261	0.469807	0.41758	0.508202	0.712222	0.737958	0.380992	0.331442	0.361764	0.674806	0.605384	0.280183	0.240489	0.24139		+	2.26594	0	-1.08621	+	3.01364	0	-1.02008	+
261	O95260	ATE1	Arginyl-tRNA--protein transferase 1 OS=Homo sapiens OX=9606 GN=ATE1 PE=1 SV=2	5			359.308	475.065	452.962	297.41	266.097	248.156	324.719	366.228	254.541	248.596	302.231	275.584	308.533	195.438	160.101	183.624		0.83733	1.10709	1.05558	0.693083	0.620111	0.578302	0.756724	0.853456	0.593181	0.579327	0.704318	0.64222	0.719004	0.455448	0.373099	0.427917		+	1.97191	0.00163812	-0.659028		1.16363	0.0105316	-0.366849	+
262	P18850	ATF6	Cyclic AMP-dependent transcription factor ATF-6 alpha OS=Homo sapiens OX=9606 GN=ATF6 PE=1 SV=3	2			247.246	315.358	346.799	199.381	173.701	173.331	212.896	218.162	122.693	101.455	129.002	192.893	195.208	105.724	87.0761	99.8322		0.815632	1.04032	1.14404	0.657732	0.573017	0.571796	0.702316	0.719688	0.404748	0.334687	0.425561	0.636328	0.643965	0.348769	0.287253	0.329333		+	1.97369	0.000764485	-0.723791	+	2.11745	0.000208754	-0.880012	+
263	Q676U5	ATG16L1	Autophagy-related protein 16-1 OS=Homo sapiens OX=9606 GN=ATG16L1 PE=1 SV=2	6			1038.82	1276.82	1366.37	794.776	665.811	612.333	776.949	913.36	523.005	532.935	630.093	895.141	899.578	489.362	474.153	514.851		0.846402	1.04032	1.11328	0.647562	0.542484	0.498912	0.633037	0.74418	0.42613	0.434221	0.513382	0.729336	0.732951	0.398719	0.386327	0.419486		+	2.15347	0.000413793	-0.827885	+	1.60693	0.00102816	-0.589052	+
264	Q9Y4P1	ATG4B	Cysteine protease ATG4B OS=Homo sapiens OX=9606 GN=ATG4B PE=1 SV=2	4			411.151	553.508	604.423	364.955	327.68	323.922	257.363	295.622	198.127	195.211	236.251	253.623	278.911	151.609	161.571	164.625		0.786098	1.05828	1.15562	0.697774	0.626506	0.619321	0.492064	0.565213	0.378808	0.373233	0.451699	0.484913	0.533263	0.289868	0.308915	0.314754		+	1.58222	0.00373286	-0.609393	+	1.21585	0.00743471	-0.399852	+
265	Q9H1Y0	ATG5	Autophagy protein 5 OS=Homo sapiens OX=9606 GN=ATG5 PE=1 SV=2	1			59.4745	67.1142	76.8982	46.0994	32.9347	44.8601	47.8638	55.8538	35.9205	31.8974	42.0263	49.6248	52.288	38.5634	25.2972	30.6424		0.87683	0.989462	1.13371	0.679642	0.485555	0.661371	0.705654	0.823451	0.529575	0.470262	0.619592	0.731617	0.77088	0.568539	0.372956	0.45176		+	1.73142	0.00116235	-0.724017	+	1.23113	0.00277749	-0.507116	+
266	O95352	ATG7	Ubiquitin-like modifier-activating enzyme ATG7 OS=Homo sapiens OX=9606 GN=ATG7 PE=1 SV=1	3			728.959	936.941	1016.34	608.834	564.541	571.187	539.992	622.398	432.485	416.954	533.591	571.249	584.781	390.451	394.387	435.954		0.815317	1.04794	1.13674	0.680961	0.631421	0.638854	0.603964	0.696132	0.483721	0.46635	0.596805	0.638924	0.654059	0.436707	0.441109	0.487601		+	1.82733	0.00322119	-0.607339		0.894142	0.0203107	-0.339297	+
267	Q7Z3C6	ATG9A	Autophagy-related protein 9A OS=Homo sapiens OX=9606 GN=ATG9A PE=1 SV=3	3			196.9	236.847	259.356	147.938	141.091	133.35	105.722	130.05	78.8297	76.6702	107.945	113.908	108.564	68.0506	61.1236	72.6353		0.852254	1.02516	1.12259	0.640329	0.610693	0.577187	0.457603	0.562903	0.341203	0.331856	0.467225	0.493035	0.469904	0.294548	0.264565	0.314392		+	2.32009	0.000618716	-0.706505	+	0.800504	0.00746574	-0.435056	+
268	P31939	ATIC	Bifunctional purine biosynthesis protein PURH OS=Homo sapiens OX=9606 GN=ATIC PE=1 SV=3	6			1142.56	1333.27	1493.94	869.593	789.893	803.092	656.685	703.557	487.998	438.308	510.318	837.744	816.168	547.187	566.44	572.173		0.863445	1.00757	1.12899	0.657161	0.596931	0.606906	0.496264	0.531686	0.368786	0.331234	0.385653	0.633093	0.616787	0.413515	0.428065	0.432398		+	2.32396	0.00115918	-0.681528	+	1.93389	0.00171122	-0.508196	+
269	Q8NHH9	ATL2	Atlastin-2 OS=Homo sapiens OX=9606 GN=ATL2 PE=1 SV=2	3			638.516	837.52	795.4	522.526	456.871	475.444	566.538	669.73	448.554	362.795	431.462	620.208	640.714	331.289	314.719	373.675		0.84332	1.10615	1.05052	0.690126	0.603413	0.627943	0.748255	0.884546	0.592428	0.479162	0.569854	0.81914	0.846223	0.43755	0.415665	0.493531		+	2.05528	0.00197781	-0.635321	+	1.50232	0.0012537	-0.57832	+
270	Q6DD88	ATL3	Atlastin-3 OS=Homo sapiens OX=9606 GN=ATL3 PE=1 SV=1	1			446.26	596.205	564.431	447.018	359.445	406.093	475.102	538.695	389.846	374.518	407.968	542.261	552.01	345.702	376.156	391.393		0.833147	1.11309	1.05377	0.834562	0.671067	0.758157	0.886993	1.00572	0.727824	0.699208	0.761657	1.01238	1.03058	0.64541	0.702266	0.730713			1.19845	0.0695079	-0.400859	+	1.70609	0.00790431	-0.373388	+
271	Q9Y2G3	ATP11B	Probable phospholipid-transporting ATPase IF OS=Homo sapiens OX=9606 GN=ATP11B PE=1 SV=2	2			233.062	275.22	323.605	220.3	198.01	261.966	198.17	212.002	129.504	102.937	123.075	295.866	278.658	181.63	185.962	208.37		0.840482	0.992515	1.167	0.794459	0.714075	0.944717	0.714652	0.764534	0.467025	0.371217	0.44384	1.06697	1.00491	0.655005	0.670627	0.751436			0.728806	0.292833	-0.287037	+	2.01679	0.000384416	-0.79731	+
272	Q9HD20	ATP13A1	Manganese-transporting ATPase 13A1 OS=Homo sapiens OX=9606 GN=ATP13A1 PE=1 SV=2	8			1546.94	2065.58	2172.89	1676.3	1470.55	1739.2	965.199	1085.84	749.049	689.869	814.568	1161.62	1201.86	762.702	906.479	954.513		0.802159	1.0711	1.12674	0.869238	0.762548	0.901855	0.5005	0.563058	0.388416	0.357729	0.422391	0.602353	0.623219	0.395496	0.470051	0.494959			0.614333	0.391673	-0.23184	+	1.58345	0.00341355	-0.449977	+
273	Q9H7F0	ATP13A3	Probable cation-transporting ATPase 13A3 OS=Homo sapiens OX=9606 GN=ATP13A3 PE=1 SV=4	4			297.95	388.217	416.092	260.679	262.684	267.862	261.285	301.291	209.512	196.195	227.63	333.171	374.924	260.528	285.782	254.718		0.810926	1.0566	1.13247	0.709486	0.714943	0.729036	0.711135	0.820019	0.570225	0.533981	0.619537	0.906786	1.02042	0.709075	0.777808	0.693262			1.46205	0.0206456	-0.463914	+	1.47319	0.0053782	-0.413054	+
274	P05023	ATP1A1	Sodium/potassium-transporting ATPase subunit alpha-1 OS=Homo sapiens OX=9606 GN=ATP1A1 PE=1 SV=1	21			3075.37	4105.22	4356.08	4259.2	3653.08	6574.75	2416.11	2632.43	1865.77	1691.01	1981.04	4598.98	3722.88	2203.99	2914.18	3222.25		0.79972	1.06752	1.13276	1.10756	0.949948	1.7097	0.628286	0.684538	0.485176	0.439731	0.51515	1.19592	0.968099	0.573126	0.757804	0.837915			0.428808	0.326002	0.298461	+	1.72618	0.00336397	-0.453236	+
275	P13637	ATP1A3	Sodium/potassium-transporting ATPase subunit alpha-3 OS=Homo sapiens OX=9606 GN=ATP1A3 PE=1 SV=3	1			68.8287	87.6635	103.335	71.2072	69.3185	117.27	55.4345	70.7945	40.7505	30.9312	43.4814	92.5621	82.1156	45.3057	59.7328	62.4248		0.794705	1.01217	1.19312	0.822168	0.800361	1.35402	0.640054	0.817403	0.470511	0.357136	0.502042	1.06873	0.948118	0.523106	0.689683	0.720765			0.0405659	0.92885	-0.0357393	+	1.26473	0.00111454	-0.721784	+
276	P05026	ATP1B1	Sodium/potassium-transporting ATPase subunit beta-1 OS=Homo sapiens OX=9606 GN=ATP1B1 PE=1 SV=1	7			831.67	1359.45	1231.77	1140.73	1063.37	1758.27	680.505	716.417	505.211	462.581	513.267	1538.28	1167.36	622.854	937.704	1079.13		0.728919	1.19149	1.07959	0.999795	0.931993	1.54104	0.59643	0.627905	0.442793	0.40543	0.449854	1.34823	1.02314	0.545902	0.821853	0.945806			0.260405	0.4886	0.204973	+	2.31999	0.0015996	-0.501602	+
277	P54709	ATP1B3	Sodium/potassium-transporting ATPase subunit beta-3 OS=Homo sapiens OX=9606 GN=ATP1B3 PE=1 SV=1	11			1879.88	2488.74	2791.74	2929.19	2402.04	4718.44	1310.49	1349.53	961.133	816.433	932.042	3157.88	2445.72	1398.77	1864.39	2141.67		0.78762	1.04272	1.16966	1.22725	1.00639	1.9769	0.54906	0.565417	0.402689	0.342064	0.390501	1.32307	1.02469	0.586047	0.78113	0.897303			0.599277	0.0847944	0.448617	+	2.02056	0.00111782	-0.561721	+
278	P16615	ATP2A2	Sarcoplasmic/endoplasmic reticulum calcium ATPase 2 OS=Homo sapiens OX=9606 GN=ATP2A2 PE=1 SV=1	11			1279.19	1675.37	1736.46	1205.69	1071.64	1158.14	1028.23	1150.42	835.473	787.771	920.941	925.043	1007.88	597.492	714.535	727.297		0.818067	1.07143	1.1105	0.771063	0.685335	0.740653	0.657573	0.735716	0.534301	0.503795	0.58896	0.591583	0.644559	0.382108	0.456959	0.465121			1.38289	0.033285	-0.438123	+	1.39613	0.00976568	-0.36193	+
279	Q93084	ATP2A3	Sarcoplasmic/endoplasmic reticulum calcium ATPase 3 OS=Homo sapiens OX=9606 GN=ATP2A3 PE=1 SV=2	6			1261.45	1569.96	1594.63	1133.12	1057.53	1123.47	969.098	1148.54	905.079	837.708	994.668	1061.73	1093.18	670.921	673.766	840.703		0.855019	1.06413	1.08085	0.768036	0.716801	0.761496	0.656861	0.778488	0.613469	0.567804	0.674193	0.719648	0.740965	0.454755	0.456683	0.569834			1.64686	0.0438946	-0.410024		0.699187	0.152428	-0.21295	+
280	P20020	ATP2B1	Plasma membrane calcium-transporting ATPase 1 OS=Homo sapiens OX=9606 GN=ATP2B1 PE=1 SV=4	7			728.982	965.882	976.997	985.393	828.787	1149.17	826.83	956.839	764.278	637.67	744.179	1246.35	1369.92	1051.59	1144.03	1185.14		0.81851	1.0845	1.09698	1.10641	0.930573	1.2903	0.928375	1.07435	0.858141	0.715984	0.835574	1.39942	1.53816	1.18074	1.28453	1.33069			0.314926	0.58706	0.149379		1.02956	0.024962	-0.318748
281	P23634	ATP2B4	Plasma membrane calcium-transporting ATPase 4 OS=Homo sapiens OX=9606 GN=ATP2B4 PE=1 SV=2	7			556.672	779.243	767.619	666.812	539.672	688.669	692.601	891	700.272	621.36	652.063	1144.94	1396.7	1152.73	1157.5	1125.89		0.79391	1.11133	1.09476	0.950988	0.769665	0.98216	0.987768	1.27072	0.998708	0.886166	0.929954	1.63288	1.99193	1.64399	1.65079	1.60571			0.298955	0.608394	-0.142039		0.733791	0.0830823	-0.257606
282	P98194	ATP2C1	Calcium-transporting ATPase type 2C member 1 OS=Homo sapiens OX=9606 GN=ATP2C1 PE=1 SV=3	3			321.913	431.119	443.484	318.133	256.371	272.073	306.352	329.242	224.033	193.836	220.84	431.054	437.117	327.864	369.562	338.799		0.807126	1.08094	1.11194	0.797648	0.642794	0.682163	0.76811	0.825502	0.561713	0.486001	0.553708	1.08077	1.09597	0.822047	0.926595	0.849464			1.3165	0.0162979	-0.490594	+	2.06544	0.00108952	-0.579986
283	P25705	ATP5F1A	ATP synthase subunit alpha, mitochondrial OS=Homo sapiens OX=9606 GN=ATP5F1A PE=1 SV=1	15			4180.47	4863.66	4412.5	3042.92	2894.72	3143.69	2745.11	2769.54	1853.29	1609.98	1950.8	2936.11	2949.97	1363.58	1603.86	1688.44		0.931987	1.0843	0.983716	0.678384	0.645344	0.700849	0.611991	0.617437	0.41317	0.358926	0.434908	0.654572	0.657662	0.303994	0.357562	0.376418		+	2.83202	0.00320185	-0.565322	+	1.98258	0.00110207	-0.616189	+
284	P06576	ATP5F1B	ATP synthase subunit beta, mitochondrial OS=Homo sapiens OX=9606 GN=ATP5F1B PE=1 SV=3	12			2585.51	3393	3240.14	2573.08	2499.47	2653.18	1489.24	1735.71	1434.22	1262.14	1539.32	1702.53	1874.37	985.389	1113.32	1405.16		0.841395	1.10417	1.05443	0.83735	0.813396	0.863417	0.484639	0.564847	0.466734	0.410735	0.500937	0.55405	0.609971	0.320672	0.362305	0.457277			0.927317	0.350007	-0.245408		0.598049	0.202431	-0.192241	+
285	P36542	ATP5F1C	ATP synthase subunit gamma, mitochondrial OS=Homo sapiens OX=9606 GN=ATP5F1C PE=1 SV=1	12			3277.98	4377.59	4065.47	3092.95	2977.51	3197.09	2212.54	2387.92	1932.53	1773.84	2089.09	2080.66	2316.08	1300.64	1484.77	1724.56		0.838999	1.12044	1.04056	0.791641	0.762094	0.818295	0.5663	0.611188	0.494631	0.454014	0.534703	0.532545	0.592801	0.332899	0.380027	0.441401			1.20145	0.172903	-0.328839		1.10101	0.0722416	-0.253982	+
286	P30049	ATP5F1D	ATP synthase subunit delta, mitochondrial OS=Homo sapiens OX=9606 GN=ATP5F1D PE=1 SV=2	2			549.402	710.506	661.525	423.975	421.659	436.643	302.268	369.884	255.721	203.947	291.673	341.643	379.26	166.285	212.412	185.783		0.8578	1.10934	1.03286	0.661967	0.658351	0.681746	0.471942	0.577513	0.399266	0.31843	0.455399	0.533419	0.592152	0.259627	0.331646	0.290069		+	2.17175	0.00372788	-0.575332	+	0.830865	0.00731241	-0.432412	+
287	P48201	ATP5MC3	ATP synthase F(0) complex subunit C3, mitochondrial OS=Homo sapiens OX=9606 GN=ATP5MC3 PE=2 SV=1	1			64.6877	99.3139	93.652	65.3629	70.1435	87.7542	53.5842	51.1738	39.311	39.2622	58.7626	46.1213	57.8443	33.8191	34.1346	37.9894		0.753194	1.15637	1.09044	0.761056	0.816719	1.02177	0.62391	0.595844	0.457719	0.457151	0.684205	0.537015	0.673512	0.393774	0.397448	0.442331			0.345434	0.485544	-0.193516		0.352786	0.181573	-0.220949	+
288	P56385	ATP5ME	ATP synthase subunit e, mitochondrial OS=Homo sapiens OX=9606 GN=ATP5ME PE=1 SV=2	1			662.756	910.752	927.708	627.676	583.209	688.951	336.648	404.359	288.796	238.311	312.454	400.177	405.771	185.467	223.563	268.494		0.794921	1.09237	1.11271	0.752845	0.699511	0.826339	0.403781	0.484995	0.346387	0.285834	0.374763	0.479979	0.486688	0.222452	0.268145	0.322036			1.04673	0.0982125	-0.383591	+	0.968758	0.00784815	-0.407925	+
289	P56134	ATP5MF	ATP synthase subunit f, mitochondrial OS=Homo sapiens OX=9606 GN=ATP5MF PE=1 SV=3	4			311.406	391.939	431.515	242.551	223.786	252.011	222.443	258.362	142.232	128.508	170.262	183.345	203.124	105.387	108.58	120.382		0.823201	1.03609	1.14071	0.641183	0.591578	0.666191	0.588028	0.682979	0.37599	0.339711	0.450087	0.484672	0.536958	0.27859	0.287031	0.31823		+	1.92087	0.00185791	-0.648314	+	1.59032	0.000569382	-0.715461	+
290	O75964	ATP5MG	ATP synthase subunit g, mitochondrial OS=Homo sapiens OX=9606 GN=ATP5MG PE=1 SV=3	3			465.704	643.965	642.688	486.327	455.904	504.018	282.623	299.259	262.103	229.868	276.56	267.518	292.47	160.211	201.194	240.621		0.797276	1.10246	1.10027	0.832582	0.780498	0.862869	0.483845	0.512325	0.448715	0.393529	0.473465	0.457985	0.500703	0.274278	0.34444	0.411938			0.747296	0.335961	-0.262127		0.750011	0.202374	-0.187293	+
291	P24539	ATP5PB	ATP synthase F(0) complex subunit B1, mitochondrial OS=Homo sapiens OX=9606 GN=ATP5PB PE=1 SV=2	4			504.437	673.771	669.081	474.417	442.155	494.98	290.48	345.947	277.812	210.689	283.844	343.506	354.105	183.593	232.232	261.001		0.819206	1.09421	1.08659	0.770454	0.71806	0.803848	0.47174	0.561818	0.451167	0.342159	0.460963	0.557854	0.575067	0.298155	0.377145	0.423866			1.21736	0.0952075	-0.377012		0.659852	0.0391339	-0.313054	+
292	O75947	ATP5PD	ATP synthase subunit d, mitochondrial OS=Homo sapiens OX=9606 GN=ATP5PD PE=1 SV=3	7			1848.31	2271.35	1796.58	555.16	498.431	470.784	886.736	1104.53	425.4	283.482	401.098	1100.14	1114.26	249.073	229.431	260.322		0.937239	1.15175	0.911008	0.28151	0.252744	0.238725	0.449645	0.560084	0.215711	0.143748	0.203388	0.557858	0.565018	0.1263	0.11634	0.132004		+	3.97542	0	-1.95181	+	1.91941	0	-1.44159	+
293	P48047	ATP5PO	ATP synthase subunit O, mitochondrial OS=Homo sapiens OX=9606 GN=ATP5PO PE=1 SV=1	12			2302.12	3244.71	3172.53	2256.29	2204.96	2333.67	1436.01	1624.99	1187	996.351	1278.85	1608.38	1694.34	765.124	837.011	1060.53		0.792072	1.11638	1.09155	0.776304	0.758643	0.802927	0.494076	0.559097	0.408402	0.342806	0.440004	0.553382	0.582958	0.26325	0.287984	0.364888			0.995416	0.162693	-0.343127	+	1.13015	0.00671277	-0.412284	+
294	Q15904	ATP6AP1	V-type proton ATPase subunit S1 OS=Homo sapiens OX=9606 GN=ATP6AP1 PE=1 SV=2	7			1019.22	1243.2	1463.52	891.509	860.683	1050.83	506.206	639.605	464.988	420.674	472.693	817.342	909.109	798.959	686.828	718.724		0.820641	1.00098	1.17838	0.717813	0.692993	0.846093	0.40758	0.514988	0.374393	0.338712	0.380596	0.658096	0.731984	0.643295	0.553011	0.578692			1.07531	0.0783346	-0.400521		0.986771	0.0209213	-0.33152
295	O75787	ATP6AP2	Renin receptor OS=Homo sapiens OX=9606 GN=ATP6AP2 PE=1 SV=2	3			229.463	296.021	350.023	221.363	198.318	280.161	112.387	151.059	97.2873	76.0976	95.0198	218.284	208.463	160.142	162.793	165.622		0.786275	1.01434	1.19938	0.758519	0.679554	0.959996	0.385104	0.517617	0.333363	0.260755	0.325594	0.747969	0.714316	0.54874	0.557824	0.567518			0.618842	0.257758	-0.316975	+	1.07767	0.00204565	-0.550945	+
296	Q93050	ATP6V0A1	V-type proton ATPase 116 kDa subunit a isoform 1 OS=Homo sapiens OX=9606 GN=ATP6V0A1 PE=1 SV=3	11			2135.93	2656.14	2888.99	1664.33	1728.51	1893.3	986.31	1232.87	883.557	832.308	923.202	1633.45	1835.97	1762.31	1382.8	1512.67		0.834233	1.03741	1.12836	0.650039	0.675106	0.739468	0.385224	0.481523	0.345092	0.325075	0.360576	0.637978	0.717077	0.688307	0.540082	0.590805		+	1.70215	0.00756581	-0.529796		1.04645	0.0212525	-0.327299
297	Q9Y487	ATP6V0A2	V-type proton ATPase 116 kDa subunit a isoform 2 OS=Homo sapiens OX=9606 GN=ATP6V0A2 PE=1 SV=2	10			1650.68	2121.18	2666.48	1736.52	1630.71	1773.86	1074.32	1319.05	921.668	761.893	866.306	1488	1627.46	1555.72	1281.72	1459.39		0.769149	0.988382	1.24247	0.809146	0.759843	0.826545	0.500589	0.614623	0.429459	0.355011	0.403663	0.693346	0.758329	0.724901	0.597228	0.680015			0.665384	0.282793	-0.298091	+	1.31637	0.00314649	-0.490486
298	P27449	ATP6V0C	V-type proton ATPase 16 kDa proteolipid subunit OS=Homo sapiens OX=9606 GN=ATP6V0C PE=1 SV=1	3			572.667	719.159	782.945	488.342	466.44	568.38	324.325	419.232	295.88	275.202	311.248	513.914	544.252	541.89	340.137	506.137		0.828044	1.03986	1.13209	0.706115	0.674446	0.821845	0.468955	0.606185	0.427826	0.397926	0.450047	0.74309	0.786957	0.783542	0.491819	0.731845			1.2867	0.0354745	-0.438826		0.91475	0.0238463	-0.328072
299	P61421	ATP6V0D1	V-type proton ATPase subunit d 1 OS=Homo sapiens OX=9606 GN=ATP6V0D1 PE=1 SV=1	10			3939.62	5084.64	5610.25	3567.23	3386.89	3855.98	1718.39	2392.75	1743.49	1652.57	1913.42	3045.58	3396.05	3136.38	2603.86	2805.3		0.807602	1.04233	1.15007	0.731264	0.694295	0.790456	0.352261	0.490502	0.357407	0.338768	0.392241	0.624328	0.696173	0.642942	0.533778	0.575072			1.23223	0.0475852	-0.423468		0.416946	0.209305	-0.198916
300	P38606	ATP6V1A	V-type proton ATPase catalytic subunit A OS=Homo sapiens OX=9606 GN=ATP6V1A PE=1 SV=2	12			1645.77	2072.73	2300.01	1438.67	1518.63	1484.68	889.723	1179.35	945.99	791.895	909.031	1436.49	1602.34	1507.04	1279.9	1362.19		0.820354	1.03318	1.14647	0.717123	0.75698	0.740057	0.443493	0.587861	0.47154	0.39473	0.453118	0.716036	0.798706	0.751203	0.637982	0.679			1.37285	0.041145	-0.424759		0.503539	0.159245	-0.219484
301	P21281	ATP6V1B2	V-type proton ATPase subunit B, brain isoform OS=Homo sapiens OX=9606 GN=ATP6V1B2 PE=1 SV=3	11			1492.96	1861.1	2032.62	1206.86	1210.57	1195.19	884.609	1092.08	788.693	702.447	745.121	1239.38	1403.64	1205.47	1025.84	1083.39		0.831473	1.0365	1.13203	0.672136	0.674202	0.665636	0.492665	0.608211	0.439246	0.391213	0.41498	0.690247	0.781728	0.671362	0.57132	0.603372		+	1.88438	0.00470372	-0.564496	+	1.27292	0.00714965	-0.400581
302	P21283	ATP6V1C1	V-type proton ATPase subunit C 1 OS=Homo sapiens OX=9606 GN=ATP6V1C1 PE=1 SV=4	4			903.835	1166.49	1292.24	734.519	768.473	722.127	500.713	628.812	448.876	396.059	448.187	769.688	764.929	601.426	534.674	529.933		0.80638	1.04071	1.15291	0.65532	0.685613	0.644264	0.446724	0.561011	0.400476	0.353354	0.399862	0.686697	0.682451	0.536578	0.477023	0.472794		+	1.69178	0.0043432	-0.580306	+	1.11149	0.00870279	-0.382929	+
303	Q9Y5K8	ATP6V1D	V-type proton ATPase subunit D OS=Homo sapiens OX=9606 GN=ATP6V1D PE=1 SV=1	6			960.429	1237.2	1393.23	886.787	888.92	904.45	544.648	728.58	594.262	498.491	595.324	905.09	969.03	971.641	770.318	855.827		0.802395	1.03362	1.16398	0.74087	0.742652	0.755627	0.455029	0.608696	0.496479	0.416467	0.497366	0.756162	0.809581	0.811762	0.643566	0.715005			1.20118	0.0648257	-0.405122		0.352099	0.288945	-0.167759
304	P36543	ATP6V1E1	V-type proton ATPase subunit E 1 OS=Homo sapiens OX=9606 GN=ATP6V1E1 PE=1 SV=1	4			1047.32	1356.03	1370.34	690.639	729.472	678.262	573.168	743.492	419.809	366.418	426.929	869.173	971.65	640.997	528.369	496.983		0.832596	1.07801	1.08939	0.549043	0.579914	0.539203	0.455656	0.59106	0.333739	0.291294	0.339399	0.690973	0.77244	0.509578	0.420042	0.39509		+	2.51439	0.000477876	-0.836594	+	1.60078	0.000851569	-0.694231	+
305	Q9UI12	ATP6V1H	V-type proton ATPase subunit H OS=Homo sapiens OX=9606 GN=ATP6V1H PE=1 SV=1	3			741.674	914.193	986.029	589.271	513.599	563.282	474.798	566.402	363.269	336.898	409.724	534.918	561.516	323.214	336.602	359.461		0.842207	1.03811	1.11968	0.669146	0.583216	0.639634	0.539156	0.643177	0.412509	0.382564	0.465261	0.607425	0.637628	0.367025	0.382228	0.408185		+	2.07297	0.00161668	-0.657161	+	1.38966	0.00290597	-0.491903	+
306	Q13535	ATR	Serine/threonine-protein kinase ATR OS=Homo sapiens OX=9606 GN=ATR PE=1 SV=3	6			586.63	687.782	722.261	421.447	408.111	422.646	397.837	414.235	259.223	262.806	321.678	386.462	404.908	206.881	236.295	219.525		0.881411	1.03339	1.0852	0.633224	0.613187	0.635025	0.59775	0.622388	0.389482	0.394866	0.483321	0.580659	0.608374	0.310839	0.355033	0.329836		+	2.71782	0.00103405	-0.66772	+	1.57337	0.00162304	-0.53671	+
307	P46100	ATRX	Transcriptional regulator ATRX OS=Homo sapiens OX=9606 GN=ATRX PE=1 SV=5	1			269.422	388.245	435.386	262.428	227.768	205.32	216.288	266.138	189.799	177.683	215.762	347.431	361.161	255.834	236.613	252.78		0.739457	1.06558	1.19496	0.720262	0.625133	0.563523	0.593625	0.730444	0.520924	0.48767	0.592182	0.953561	0.991245	0.702164	0.649409	0.693782		+	1.27163	0.00392683	-0.63059		0.856543	0.0338611	-0.308158	+
308	Q9UBB4	ATXN10	Ataxin-10 OS=Homo sapiens OX=9606 GN=ATXN10 PE=1 SV=1	4			583.553	707.288	745.657	457.7	404.768	433.487	312.785	347.9	230.493	202.593	241.503	325.158	365.459	194.074	212.663	217.809		0.859642	1.04192	1.09844	0.674246	0.596271	0.638577	0.460769	0.512497	0.339543	0.298443	0.355762	0.478996	0.538364	0.285894	0.313277	0.320858		+	2.25215	0.00160644	-0.646062	+	1.79164	0.00131229	-0.556806	+
309	Q99700	ATXN2	Ataxin-2 OS=Homo sapiens OX=9606 GN=ATXN2 PE=1 SV=2	12			1526.09	1971.6	2090.84	1163.66	1066.15	1093.94	1421.31	1681.9	1081.54	990.902	1116.46	1829.65	1935.43	1156.42	1047.12	1132.57		0.819226	1.05838	1.12239	0.624669	0.572324	0.587242	0.762979	0.902867	0.580586	0.53193	0.599331	0.982181	1.03897	0.620782	0.562108	0.607979		+	2.15832	0.000606684	-0.737559	+	1.77179	0.00142888	-0.542379	+
310	Q8WWM7	ATXN2L	Ataxin-2-like protein OS=Homo sapiens OX=9606 GN=ATXN2L PE=1 SV=2	11			1830.85	2389.26	2481.47	1544.14	1450.84	1504.16	1499.66	1689.02	1020.55	865.95	1008.86	1855.81	1734.34	1011.75	981.931	974.913		0.81959	1.06957	1.11084	0.691243	0.649477	0.673346	0.671331	0.756099	0.456855	0.387647	0.451622	0.830764	0.776387	0.452916	0.439567	0.436425		+	1.79411	0.00483422	-0.562541	+	2.06789	0.000467091	-0.725601	+
311	Q9Y679	AUP1	Ancient ubiquitous protein 1 OS=Homo sapiens OX=9606 GN=AUP1 PE=1 SV=2	8			1907.84	2415.28	2593.61	1550.28	1439.85	1562.27	1277.34	1540.63	1046.49	981.389	1252.74	1353.83	1423.77	797.306	788.738	944.971		0.827489	1.04758	1.12493	0.672404	0.624508	0.677605	0.554022	0.668219	0.453895	0.425659	0.543352	0.587198	0.617533	0.345816	0.3421	0.409863		+	1.88439	0.00354214	-0.592334		0.925772	0.0132557	-0.367151	+
312	O14965	AURKA	Aurora kinase A OS=Homo sapiens OX=9606 GN=AURKA PE=1 SV=2	2			35.1996	42.2109	42.295	36.9566	34.7045	24.935	38.9606	32.2233	30.9236	27.0175	27.2991	34.4181	42.0898	27.2176	30.4384	26.8893		0.882155	1.05787	1.05998	0.926188	0.869747	0.624909	0.976411	0.807564	0.774992	0.677099	0.684157	0.862569	1.05483	0.682114	0.762832	0.673886			0.759255	0.223074	-0.324845		1.04445	0.0239226	-0.321241	+
313	Q9NWT8	AURKAIP1	Aurora kinase A-interacting protein OS=Homo sapiens OX=9606 GN=AURKAIP1 PE=1 SV=1	3			1292.24	1446.72	1299.47	646.142	620.504	582.441	1456.38	1350.79	632.026	588.21	677.44	1266.72	1271.59	451.492	473.325	503.925		0.959957	1.07471	0.965328	0.479995	0.460949	0.432674	1.08189	1.00345	0.469509	0.436959	0.503245	0.940999	0.944617	0.335397	0.351616	0.374347		+	4.09331	0	-1.12632	+	3.04442	0	-1.15122	+
314	Q96GD4	AURKB	Aurora kinase B OS=Homo sapiens OX=9606 GN=AURKB PE=1 SV=3	2			1159.48	1365.56	1358.29	672.301	599.243	659.904	1042.34	1179.69	645.801	618.377	694.195	958.921	985.54	414.366	435.9	432.84		0.895736	1.05494	1.04932	0.519375	0.462935	0.509798	0.805242	0.911349	0.498902	0.477717	0.536288	0.740798	0.761362	0.320111	0.336747	0.334383		+	3.3825	0	-1.00535	+	2.44663	0.000381443	-0.766073	+
315	Q8NBF6	AVL9	Late secretory pathway protein AVL9 homolog OS=Homo sapiens OX=9606 GN=AVL9 PE=1 SV=1	1			159.88	210.824	216.99	138.201	122.165	125.284	103.49	115.389	82.382	67.4157	75.1217	125.002	124.253	59.1283	72.0969	69.4492		0.816139	1.07619	1.10767	0.705474	0.623615	0.639537	0.528285	0.589026	0.420535	0.344137	0.383474	0.638097	0.634274	0.301832	0.368033	0.354517		+	1.77861	0.00364806	-0.596619	+	1.67995	0.00143811	-0.548379	+
316	P30530	AXL	Tyrosine-protein kinase receptor UFO OS=Homo sapiens OX=9606 GN=AXL PE=1 SV=4	2			257.789	345.723	355.246	250.678	216.635	236.086	436.451	587.139	479.829	429.325	464.058	545.389	634.899	577.717	516.114	517.792		0.806634	1.08178	1.11158	0.784384	0.677861	0.738724	1.36568	1.83719	1.50141	1.34338	1.45206	1.70655	1.98663	1.8077	1.61495	1.6202			1.27287	0.0384043	-0.434737		0.34349	0.350351	-0.146796
317	P15291	B4GALT1	Beta-1,4-galactosyltransferase 1 OS=Homo sapiens OX=9606 GN=B4GALT1 PE=1 SV=5	3			72.0569	100.242	108.258	70.3843	72.3166	70.4707	71.1912	68.231	42.3268	39.3816	38.7627	74.8196	74.5234	37.4371	40.0094	52.559		0.770506	1.07189	1.1576	0.752621	0.773283	0.753544	0.761249	0.729595	0.452601	0.421108	0.41449	0.800047	0.79688	0.400316	0.427821	0.562014			0.972362	0.115782	-0.374783	+	3.13825	0.000196513	-0.796476	+
318	Q9NXR7	BABAM2	BRISC and BRCA1-A complex member 2 OS=Homo sapiens OX=9606 GN=BABAM2 PE=1 SV=2	2			572.842	644.158	660.092	445.789	348.206	352.805	284.207	333.364	205.478	193.565	229.653	296.074	309.261	158.371	166.18	177.053		0.915526	1.0295	1.05497	0.712467	0.556509	0.563859	0.454224	0.532788	0.328398	0.309359	0.367035	0.47319	0.494266	0.253111	0.265592	0.282969		+	2.25691	0.000566853	-0.717682	+	1.66361	0.00129047	-0.558268	+
319	Q99933	BAG1	BAG family molecular chaperone regulator 1 OS=Homo sapiens OX=9606 GN=BAG1 PE=1 SV=4	1			102.226	114.974	108.106	85.3424	80.8109	73.6277	53.998	53.8016	32.6879	24.7661	24.2061	77.6434	67.8717	30.6474	35.5826	35.7694		0.942737	1.0603	0.996963	0.787035	0.745245	0.679001	0.497974	0.496163	0.301451	0.228395	0.223231	0.716034	0.625919	0.282633	0.328146	0.329868			2.29407	0.0191089	-0.44108	+	1.93965	0.000262712	-0.999446	+
320	O95816	BAG2	BAG family molecular chaperone regulator 2 OS=Homo sapiens OX=9606 GN=BAG2 PE=1 SV=1	4			1341.32	1872.63	1718.97	836.647	772.138	785.541	679.231	930.118	452.063	337.169	420.497	2193.36	1547.28	656.05	806.022	719.679		0.815736	1.13886	1.04541	0.508814	0.469583	0.477734	0.41308	0.56566	0.274926	0.205052	0.255729	1.33391	0.940992	0.398983	0.49019	0.437679		+	2.6427	0	-1.02963	+	1.6086	0.000224638	-0.989961	+
321	P46379	BAG6	Large proline-rich protein BAG6 OS=Homo sapiens OX=9606 GN=BAG6 PE=1 SV=2	9			1488.11	1978.41	1945.32	1265.42	1098.87	1168.77	943.01	1110.64	691.172	534.006	666.106	1329.28	1310.04	737.734	770.399	787.512		0.824919	1.09671	1.07837	0.701473	0.609148	0.647896	0.522748	0.615672	0.383144	0.296021	0.369249	0.736873	0.726208	0.408956	0.427063	0.436549		+	1.85002	0.00321969	-0.605734	+	1.57291	0.000555944	-0.708079	+
322	Q9UQB8	BAIAP2	Brain-specific angiogenesis inhibitor 1-associated protein 2 OS=Homo sapiens OX=9606 GN=BAIAP2 PE=1 SV=1	7			617.155	785.542	832.617	546.924	464.957	519.809	755.167	939.216	620.228	532.595	556.497	660.519	725.284	432.886	451.987	488.593		0.82828	1.05427	1.11745	0.734023	0.624016	0.697632	1.0135	1.26052	0.832404	0.714792	0.746871	0.886478	0.973399	0.580973	0.606609	0.655737		+	1.64169	0.00710789	-0.536852	+	1.53091	0.00128904	-0.566723	+
323	Q9UHR4	BAIAP2L1	Brain-specific angiogenesis inhibitor 1-associated protein 2-like protein 1 OS=Homo sapiens OX=9606 GN=BAIAP2L1 PE=1 SV=2	11			2214.91	2744.36	3004.35	1930.14	1707.67	1876.66	2333.09	2816.29	2130.85	1971.14	2019.89	1760.9	1805.4	1228.38	1232.35	1324.81		0.834386	1.03384	1.13178	0.727109	0.643302	0.706962	0.878906	1.06093	0.802719	0.742554	0.760919	0.663354	0.680118	0.462747	0.464242	0.499073		+	1.67902	0.00866196	-0.520623		1.2393	0.0187209	-0.329774	+
324	Q9NRL2	BAZ1A	Bromodomain adjacent to zinc finger domain protein 1A OS=Homo sapiens OX=9606 GN=BAZ1A PE=1 SV=2	14			5231.43	6792.36	6489.03	3166.29	2917.19	3041.59	4004.98	3990.05	1858.45	1678.01	1787.18	3826.4	3765.33	1481.74	1520.3	1525.21		0.847753	1.1007	1.05155	0.513097	0.47273	0.492889	0.649006	0.646587	0.301162	0.271921	0.289612	0.620068	0.610171	0.240116	0.246364	0.24716		+	2.95137	0	-1.01231	+	3.63612	0	-1.17292	+
325	Q9UIG0	BAZ1B	Tyrosine-protein kinase BAZ1B OS=Homo sapiens OX=9606 GN=BAZ1B PE=1 SV=2	11			2222.88	2838.12	2870.06	1354.55	1223.39	1348.77	2341.89	2668.38	1190.71	1102.6	1135.65	2000.08	2263.69	837.95	851.278	930.119		0.840826	1.07355	1.08563	0.512372	0.462759	0.510185	0.885842	1.00934	0.450398	0.417069	0.429571	0.75655	0.856263	0.316963	0.322004	0.351826		+	2.82974	0	-1.00603	+	3.08804	0	-1.12974	+
326	Q9UIF9	BAZ2A	Bromodomain adjacent to zinc finger domain protein 2A OS=Homo sapiens OX=9606 GN=BAZ2A PE=1 SV=4	10			2954.44	3796.18	3717.61	1819.41	1628.39	1645.84	2213.78	2621.56	1193.63	1081.58	1184.3	2776.88	2729.8	957.212	979.249	1024.12		0.846688	1.08791	1.0654	0.521409	0.466666	0.471667	0.634428	0.75129	0.342072	0.309961	0.339398	0.795802	0.78231	0.274319	0.280635	0.293494		+	2.90961	0	-1.03202	+	2.6495	0	-1.06429	+
327	Q8WY36	BBX	HMG box transcription factor BBX OS=Homo sapiens OX=9606 GN=BBX PE=1 SV=1	11			1652.43	2015.01	2105.8	1022.93	928.135	957.113	1770	1676.11	749.326	688.043	751.114	2015.67	1958.65	763.362	733.013	729.815		0.858667	1.04708	1.09426	0.531554	0.482295	0.497353	0.919761	0.870972	0.389379	0.357534	0.390308	1.04742	1.01779	0.396673	0.380902	0.37924		+	2.98341	0	-0.982623	+	3.58104	0	-1.24065	+
328	P51572	BCAP31	B-cell receptor-associated protein 31 OS=Homo sapiens OX=9606 GN=BCAP31 PE=1 SV=3	12			1432.4	1833.87	1848.99	1569.63	1554.03	1778.14	1196.51	1293.71	1059.93	885.447	1080.66	2421.68	2275.15	1214.03	1787.05	2001.48		0.840075	1.07553	1.0844	0.920557	0.911408	1.04284	0.70173	0.758736	0.621628	0.519297	0.633786	1.42027	1.33433	0.712005	1.04807	1.17383			0.148974	0.866906	-0.0544184		1.04143	0.029077	-0.308387	+
329	O75934	BCAS2	Pre-mRNA-splicing factor SPF27 OS=Homo sapiens OX=9606 GN=BCAS2 PE=1 SV=1	5			2200.82	2441.27	1266.62	392.941	424.961	332.794	1284.32	1337.23	365.592	226.777	320.521	1249.53	1082.74	155.387	175.113	145.133		1.11741	1.23949	0.643095	0.199506	0.215763	0.168968	0.652081	0.678945	0.18562	0.11514	0.162737	0.634418	0.549734	0.0788939	0.0889093	0.0736877		+	2.75395	0	-2.31206	+	2.39305	0	-2.13474	+
330	O15382	BCAT2	Branched-chain-amino-acid aminotransferase, mitochondrial OS=Homo sapiens OX=9606 GN=BCAT2 PE=1 SV=2	1			444.018	503.349	504.105	287.43	269.792	262.854	253.515	262.429	169.361	139.135	165.316	330.235	311.966	180.62	188.22	182.603		0.917726	1.04036	1.04192	0.59408	0.557624	0.543284	0.523982	0.542406	0.350047	0.287574	0.341686	0.682552	0.644792	0.373318	0.389026	0.377416		+	3.48024	0.000348432	-0.822194	+	2.05435	0.000444894	-0.713061	+
331	Q9P287	BCCIP	BRCA2 and CDKN1A-interacting protein OS=Homo sapiens OX=9606 GN=BCCIP PE=1 SV=1	7			1654.06	2150.54	2247.17	1324.1	1150.91	1158.2	737.914	908.641	537.424	518.385	598.175	807.58	838.901	473.759	426.931	506.553		0.819955	1.06607	1.11397	0.656386	0.570532	0.574146	0.365801	0.450434	0.266413	0.256975	0.296529	0.400336	0.415862	0.234853	0.211639	0.25111		+	2.04677	0.000624025	-0.726383	+	1.59944	0.0011638	-0.573364	+
332	O14874	BCKDK	[3-methyl-2-oxobutanoate dehydrogenase [lipoamide]] kinase, mitochondrial OS=Homo sapiens OX=9606 GN=BCKDK PE=1 SV=2	1			46.5434	54.9043	52.0773	23.9584	29.2519	22.287	42.1874	48.5575	23.9547	25.4985	33.7928	33.8079	34.4402	19.2603	20.0212	15.4382		0.909495	1.07287	1.01763	0.468166	0.571605	0.435506	0.824375	0.948852	0.468094	0.498261	0.660338	0.660633	0.672989	0.376362	0.39123	0.301675		+	2.77927	0	-1.0303	+	1.37901	0.000709292	-0.722441	+
333	Q9BQE9	BCL7B	B-cell CLL/lymphoma 7 protein family member B OS=Homo sapiens OX=9606 GN=BCL7B PE=1 SV=1	4			380.254	457.25	457.233	236.778	215.288	221.322	428.679	439.289	242.906	214.042	218.343	388.132	400.337	141.875	179.932	189.166		0.881076	1.05948	1.05944	0.548632	0.498838	0.512819	0.99328	1.01786	0.562831	0.495951	0.505917	0.89933	0.92761	0.328735	0.416916	0.438311		+	3.18552	0.000245989	-0.938975	+	2.98484	0	-0.949238	+
334	Q8WUZ0	BCL7C	B-cell CLL/lymphoma 7 protein family member C OS=Homo sapiens OX=9606 GN=BCL7C PE=1 SV=3	1			290.73	317.557	319.784	158.587	136.703	125.741	206.793	207.729	93.4842	80.8227	86.0011	230.403	232.677	80.8244	86.3177	78.814		0.939788	1.02651	1.03371	0.512634	0.441894	0.406459	0.668461	0.671486	0.302189	0.26126	0.278	0.74478	0.752131	0.261266	0.279023	0.254767		+	3.35863	0	-1.14567	+	3.27672	0	-1.25876	+
335	Q9NYF8	BCLAF1	Bcl-2-associated transcription factor 1 OS=Homo sapiens OX=9606 GN=BCLAF1 PE=1 SV=2	8			1207.21	1516.1	1613.95	1117.15	1077.12	1102.88	787.851	938.647	662.008	638.222	742.242	821.757	941	759.894	603.344	605.167		0.835004	1.04866	1.11634	0.772711	0.745023	0.762841	0.544942	0.649244	0.457898	0.441446	0.513395	0.568394	0.650872	0.525604	0.417322	0.418582			1.39895	0.0779684	-0.384787		1.12631	0.0169997	-0.339987	+
336	P11274	BCR	Breakpoint cluster region protein OS=Homo sapiens OX=9606 GN=BCR PE=1 SV=2	1			197.287	272.009	296.443	152.083	149.815	150.524	161.989	191.712	110.22	102.982	121.126	175.564	162.985	102.88	99.3364	105.528		0.772928	1.06567	1.1614	0.595828	0.586943	0.589721	0.634638	0.751086	0.431818	0.403461	0.474546	0.687822	0.63854	0.403062	0.389179	0.413436		+	1.83709	0.000692073	-0.73789	+	1.87581	0.00113859	-0.664323	+
337	Q02338	BDH1	D-beta-hydroxybutyrate dehydrogenase, mitochondrial OS=Homo sapiens OX=9606 GN=BDH1 PE=1 SV=3	6			1902.12	2389.61	2475.52	1590.3	1441.25	1526.02	941.344	1129.95	715.219	692.8	844.101	857.566	893.913	473.104	499.654	548.309		0.843232	1.05934	1.09743	0.704998	0.638923	0.676502	0.417309	0.50092	0.317065	0.307126	0.3742	0.380169	0.396282	0.209732	0.221502	0.243072		+	1.95173	0.00467308	-0.561907	+	1.26699	0.00345045	-0.463708	+
338	Q5T5X7	BEND3	BEN domain-containing protein 3 OS=Homo sapiens OX=9606 GN=BEND3 PE=1 SV=1	6			1409.81	1817.13	1978.75	1185.25	1123.59	1198.37	686.707	767.773	546.919	521.987	632.205	727.179	746.711	386.034	433.924	472.281		0.812463	1.0472	1.14034	0.683051	0.647516	0.690612	0.395744	0.442462	0.315185	0.300817	0.364335	0.419068	0.430324	0.222468	0.250067	0.272172		+	1.68629	0.00567229	-0.55579		1.21781	0.0110498	-0.361609	+
339	Q9NR09	BIRC6	Baculoviral IAP repeat-containing protein 6 OS=Homo sapiens OX=9606 GN=BIRC6 PE=1 SV=2	11			1356.27	1718.94	1912.5	1222.75	1199.76	1208.43	831.599	933.912	683.459	639.347	769.917	1003.26	1016.01	563.475	637.247	736.345		0.815767	1.03391	1.15033	0.735458	0.72163	0.726845	0.500189	0.561728	0.411086	0.384553	0.463088	0.603439	0.611108	0.338918	0.38329	0.442896			1.40829	0.0303749	-0.443538		1.19426	0.0154564	-0.341535	+
340	P54132	BLM	Bloom syndrome protein OS=Homo sapiens OX=9606 GN=BLM PE=1 SV=1	9			1553.7	1957.13	2033.41	1049.38	910.406	928.631	933.028	930.396	469.062	416.888	483.865	944.5	882.335	370.431	369.89	378.003		0.84071	1.05901	1.10028	0.567822	0.492623	0.502484	0.504863	0.503439	0.25381	0.225579	0.26182	0.511071	0.477433	0.200441	0.200148	0.204538		+	2.61391	0.000211982	-0.933684	+	2.92671	0	-1.03187	+
341	Q13867	BLMH	Bleomycin hydrolase OS=Homo sapiens OX=9606 GN=BLMH PE=1 SV=1	3			298.677	501.089	343.359	289.305	303.717	261.738	176.227	195.612	168.756	136.644	150.854	267.803	263.979	239.433	238.824	235.937		0.783843	1.31505	0.901106	0.759248	0.79707	0.686901	0.462487	0.513361	0.442881	0.358606	0.395899	0.702818	0.692783	0.628364	0.626766	0.61919			0.768015	0.122109	-0.386643		0.984752	0.0394531	-0.29321
342	P53004	BLVRA	Biliverdin reductase A OS=Homo sapiens OX=9606 GN=BLVRA PE=1 SV=2	11			1088.76	1371.09	1360.12	833.343	733.127	718.376	929.378	1087.77	657.934	636.562	786.203	1114.86	1167.98	628.88	608.468	672.883		0.855054	1.07678	1.06817	0.654463	0.575759	0.564174	0.729884	0.854276	0.516706	0.499922	0.617442	0.875551	0.917269	0.493889	0.477858	0.528446		+	2.34511	0.000644809	-0.736605	+	1.44941	0.00160922	-0.542068	+
343	Q9NSY1	BMP2K	BMP-2-inducible protein kinase OS=Homo sapiens OX=9606 GN=BMP2K PE=1 SV=2	6			643.42	818.539	890.281	619.368	560.209	577.824	548.724	585.636	443.844	406.566	483.13	616.378	617.405	399.812	416.395	449.576		0.820605	1.04395	1.13545	0.78993	0.714479	0.736945	0.699832	0.746908	0.56607	0.518526	0.616174	0.786116	0.787426	0.509912	0.531062	0.57338			1.30416	0.0565512	-0.40856		1.42663	0.0110534	-0.354391	+
344	P12644	BMP4	Bone morphogenetic protein 4 OS=Homo sapiens OX=9606 GN=BMP4 PE=1 SV=1	1			103.904	119.928	134.175	66.214	57.6853	57.3694	159.956	168.816	90.3594	69.8292	79.5461	166.302	153.612	68.1222	56.9377	55.6436		0.870687	1.00496	1.12435	0.554855	0.483387	0.48074	1.34039	1.41463	0.757187	0.585149	0.666574	1.39356	1.28723	0.570845	0.477122	0.466278		+	2.82196	0.000254848	-0.977233	+	2.2925	0	-1.04806	+
345	P36894	BMPR1A	Bone morphogenetic protein receptor type-1A OS=Homo sapiens OX=9606 GN=BMPR1A PE=1 SV=2	1			185.485	249.544	276.054	211.542	195.962	221.872	254.492	347.54	297.931	272.452	283.368	468.767	604.622	588.487	522.481	473.181		0.782546	1.05281	1.16465	0.892478	0.826747	0.93606	1.07368	1.46624	1.25695	1.14945	1.19551	1.97769	2.55085	2.48278	2.2043	1.99631			0.36745	0.555312	-0.158101		0.133171	0.691038	-0.0645139
346	Q14692	BMS1	Ribosome biogenesis protein BMS1 homolog OS=Homo sapiens OX=9606 GN=BMS1 PE=1 SV=1	7			1065.57	1329.1	1320.55	723.491	685.064	725.814	969.101	940.152	502.378	461.604	533.31	897.214	892.204	460.215	430.5	471.004		0.860436	1.07323	1.06633	0.584211	0.553182	0.586087	0.782539	0.759163	0.405665	0.37274	0.430642	0.724491	0.720445	0.371619	0.347624	0.380331		+	2.73364	0.000420779	-0.792728	+	2.87981	0.000280543	-0.937969	+
347	Q14137	BOP1	Ribosome biogenesis protein BOP1 OS=Homo sapiens OX=9606 GN=BOP1 PE=1 SV=2	5			2660.27	3919.13	1114.16	2057.81	1750.42	1943.21	985.131	1030.36	690.535	643.371	768.601	968.833	983.282	631.049	625.932	598.326		1.03734	1.52821	0.434452	0.802415	0.682553	0.757729	0.384139	0.401775	0.269265	0.250874	0.299706	0.377783	0.383418	0.246069	0.244074	0.233309			0.170207	0.483176	-0.243603	+	1.88556	0.00147587	-0.527496	+
348	Q6PJG6	BRAT1	BRCA1-associated ATM activator 1 OS=Homo sapiens OX=9606 GN=BRAT1 PE=1 SV=2	2			131.128	163.137	160.064	94.1227	99.2564	103.4	61.3815	76.1267	52.4345	42.5082	57.6932	61.6338	64.8712	35.5759	35.443	42.5546		0.865857	1.07722	1.05693	0.621506	0.655404	0.682765	0.405311	0.502676	0.346233	0.280688	0.380957	0.406977	0.428354	0.234913	0.234035	0.280994		+	2.30919	0.0022963	-0.608542	+	0.916037	0.00592704	-0.43755	+
349	O95696	BRD1	Bromodomain-containing protein 1 OS=Homo sapiens OX=9606 GN=BRD1 PE=1 SV=1	6			813.519	984.705	1022.07	494.789	493.513	477.181	898.354	872.588	436.231	373.774	420.283	928.036	880.989	352.581	326.91	341.23		0.865356	1.04745	1.0872	0.526316	0.524959	0.507586	0.955596	0.928188	0.464027	0.39759	0.447063	0.987169	0.937125	0.375047	0.34774	0.362973		+	3.08692	0.000240209	-0.937617	+	2.97106	0	-1.11342	+
350	Q9NPI1	BRD7	Bromodomain-containing protein 7 OS=Homo sapiens OX=9606 GN=BRD7 PE=1 SV=1	9			2434.03	2899.14	2640.95	1295.75	1138.69	1260.09	2217.55	2267.22	926.631	868.994	959.651	2421.27	2319	676.458	801.65	791.843		0.915724	1.09071	0.99357	0.487483	0.428395	0.474067	0.83428	0.852967	0.348614	0.32693	0.361037	0.910923	0.872447	0.254495	0.301594	0.297905		+	3.55976	0	-1.10845	+	3.75924	0	-1.28892	+
351	Q9H0E9	BRD8	Bromodomain-containing protein 8 OS=Homo sapiens OX=9606 GN=BRD8 PE=1 SV=2	2			1102.39	1501.75	1367.09	1035.98	864.195	817.809	1039.04	1266.77	950.583	1013.4	1039.25	1181.5	1213.72	810.716	834.607	855.501		0.832782	1.13447	1.03275	0.782614	0.652842	0.6178	0.784926	0.95696	0.718102	0.765556	0.785084	0.892545	0.916885	0.612442	0.63049	0.646274		+	1.49956	0.00750758	-0.542709		0.718946	0.180738	-0.197659	+
352	Q9H8M2	BRD9	Bromodomain-containing protein 9 OS=Homo sapiens OX=9606 GN=BRD9 PE=1 SV=2	2			667.92	1028.45	937.962	552.308	541.603	619.742	785.677	715.698	559.972	608.854	855.065	716.514	778.915	748.964	506.576	538.754		0.760633	1.17121	1.06816	0.628973	0.616782	0.705768	0.894736	0.815043	0.637701	0.693368	0.973755	0.815972	0.887035	0.852927	0.576893	0.613538		+	1.40412	0.0046443	-0.599076		0.281414	0.283233	-0.177482
353	Q8WY22	BRI3BP	BRI3-binding protein OS=Homo sapiens OX=9606 GN=BRI3BP PE=1 SV=1	2			282.034	334.733	332.319	244.442	215.51	211.003	229.678	246.21	159.702	151.534	176.629	259.39	257.985	116.835	135.929	135.124		0.891491	1.05807	1.05044	0.772665	0.681213	0.666967	0.725997	0.778254	0.504808	0.478989	0.558313	0.819915	0.815474	0.369308	0.429663	0.427118		+	2.05647	0.00923258	-0.498979	+	2.03492	0.00117118	-0.551169	+
354	Q9BX63	BRIP1	Fanconi anemia group J protein OS=Homo sapiens OX=9606 GN=BRIP1 PE=1 SV=2	1			142.596	195.375	214.93	102.605	89.5128	102.852	151.143	129.922	91.9229	80.3563	85.0005	160.242	153.924	70.7451	83.6466	94.6134		0.773715	1.06009	1.16619	0.556727	0.48569	0.558067	0.820091	0.704947	0.498767	0.436007	0.461206	0.869461	0.83518	0.383858	0.45386	0.513365		+	2.0171	0.000500773	-0.88807	+	2.13419	0.000449438	-0.710606	+
355	Q8TDN6	BRIX1	Ribosome biogenesis protein BRX1 homolog OS=Homo sapiens OX=9606 GN=BRIX1 PE=1 SV=2	9			3139.8	3375.83	3015.82	1289.96	1256.67	1421	1846.23	1878.55	904.978	774.04	952.244	2486.87	2155.5	1064.96	989.414	1032.37		0.988244	1.06253	0.949222	0.406012	0.395534	0.447256	0.581096	0.591269	0.28484	0.243627	0.299716	0.782736	0.678438	0.335193	0.311416	0.324936		+	4.21178	0	-1.26488	+	2.58975	0	-1.09182	+
356	Q5VW32	BROX	BRO1 domain-containing protein BROX OS=Homo sapiens OX=9606 GN=BROX PE=1 SV=1	3			307.922	404.755	423.981	270.115	245.081	267.368	309.723	344.632	275.23	244.19	262.181	483.754	536.97	446.931	396.342	414.374		0.812704	1.06828	1.11902	0.712919	0.646846	0.705669	0.817457	0.909593	0.726419	0.644495	0.691979	1.27678	1.41723	1.17959	1.04607	1.09366		+	1.6002	0.00857377	-0.525985		1.49313	0.0168109	-0.328283
357	P55201	BRPF1	Peregrin OS=Homo sapiens OX=9606 GN=BRPF1 PE=1 SV=2	3			996.809	1282.02	1195.73	622.248	570.651	606.943	1046.5	1050.83	537.686	529.332	541.989	897.281	896.055	392.742	379.112	365.833		0.860664	1.10692	1.03242	0.537261	0.492711	0.524046	0.903568	0.907307	0.464248	0.457035	0.467964	0.774729	0.773671	0.339101	0.327332	0.315867		+	2.92568	0.000235897	-0.941941	+	5.26022	0	-0.967412	+
358	P35613	BSG	Basigin OS=Homo sapiens OX=9606 GN=BSG PE=1 SV=2	10			1119.69	1491.76	1557.47	1376.77	1207.56	1863.27	726.685	748.074	503.48	437.003	511.551	1293.43	1060.71	600.332	772.614	734.901		0.805741	1.07349	1.12077	0.990739	0.868973	1.34083	0.52293	0.538322	0.36231	0.314472	0.368118	0.930766	0.763298	0.432005	0.555981	0.528843			0.129557	0.799235	0.0839667	+	2.12359	0.00111159	-0.61077	+
359	O14981	BTAF1	TATA-binding protein-associated factor 172 OS=Homo sapiens OX=9606 GN=BTAF1 PE=1 SV=2	9			1138.26	1403.21	1519.49	973.004	916.188	994.384	699.336	780.048	553.833	540.869	686.557	730.154	706.529	401.099	456.598	504.684		0.84088	1.03661	1.12251	0.718799	0.676826	0.734593	0.516629	0.576254	0.409139	0.399562	0.507188	0.539395	0.521942	0.296309	0.337308	0.372831			1.69959	0.0131847	-0.484347		0.903267	0.0257346	-0.323404	+
360	Q9H0C5	BTBD1	BTB/POZ domain-containing protein 1 OS=Homo sapiens OX=9606 GN=BTBD1 PE=1 SV=1	1			61.7763	80.952	72.6295	44.8453	39.4734	41.876	55.4586	55.81	32.2568	29.0562	28.0031	48.2599	48.0296	27.7883	29.6775	37.1673		0.860563	1.12769	1.01175	0.624709	0.549877	0.583345	0.772555	0.77745	0.449347	0.404762	0.390092	0.672275	0.669067	0.3871	0.413417	0.517752		+	2.43861	0.000534737	-0.764238	+	2.84571	0.000253579	-0.904622	+
361	P20290	BTF3	Transcription factor BTF3 OS=Homo sapiens OX=9606 GN=BTF3 PE=1 SV=1	8			1341.72	1599.79	1446.12	707.426	620.919	629.682	1239.12	1330.7	550.685	457.176	503.115	1310	1249.25	436.309	378.555	408.473		0.917388	1.09384	0.988771	0.483696	0.424547	0.430539	0.847236	0.909853	0.376526	0.31259	0.344	0.8957	0.854163	0.298322	0.258833	0.27929		+	3.59777	0	-1.16278	+	2.97134	0	-1.35439	+
362	Q96K17	BTF3L4	Transcription factor BTF3 homolog 4 OS=Homo sapiens OX=9606 GN=BTF3L4 PE=1 SV=1	4			818.181	985.924	847.988	470.728	353.97	358.39	556.079	696.878	312.49	243.571	273.519	789.269	799.089	256.026	232.316	252.597		0.925512	1.11526	0.959229	0.532479	0.400405	0.405404	0.629027	0.788296	0.353483	0.275523	0.3094	0.892807	0.903915	0.289612	0.262792	0.285733		+	2.75985	0	-1.17263	+	2.13396	0	-1.17817	+
363	O43683	BUB1	Mitotic checkpoint serine/threonine-protein kinase BUB1 OS=Homo sapiens OX=9606 GN=BUB1 PE=1 SV=1	1			517.413	632.545	618.999	320.153	275.5	292.017	434.221	444.064	222.618	212.63	258.616	384.376	380.111	152.749	136.895	158.706		0.877488	1.07274	1.04977	0.542952	0.467224	0.495236	0.736402	0.753095	0.377541	0.360602	0.438591	0.651869	0.644636	0.259049	0.232162	0.269152		+	3.0553	0	-0.991852	+	2.45056	0.000252546	-0.930023	+
364	O60566	BUB1B	Mitotic checkpoint serine/threonine-protein kinase BUB1 beta OS=Homo sapiens OX=9606 GN=BUB1B PE=1 SV=3	4			855.394	1016.76	1076.06	598.135	543.23	578.913	520.701	590.755	363.439	350.525	422.758	424.401	472.349	223.3	256.34	261.706		0.870419	1.03462	1.09496	0.608641	0.552772	0.589082	0.529847	0.601132	0.369823	0.356682	0.430184	0.431856	0.480646	0.227222	0.260843	0.266303		+	2.69842	0.000380282	-0.771601	+	1.65689	0.00137137	-0.554487	+
365	O43684	BUB3	Mitotic checkpoint protein BUB3 OS=Homo sapiens OX=9606 GN=BUB3 PE=1 SV=1	9			1995.68	2464.4	2503.94	1597.87	1332.8	1381.91	1521.59	1692.98	1107.09	1078.11	1261.77	1153.8	1189.86	630.583	674.393	737.328		0.85971	1.06163	1.07866	0.688339	0.574151	0.595307	0.655479	0.729312	0.476919	0.464434	0.543552	0.497041	0.512575	0.271646	0.290519	0.31763		+	2.18607	0.001222	-0.688348	+	1.69622	0.00240422	-0.485664	+
366	O43709	BUD23	Probable 18S rRNA (guanine-N(7))-methyltransferase OS=Homo sapiens OX=9606 GN=BUD23 PE=1 SV=2	3			594.478	687.991	721.89	389.3	345.99	354.574	516.579	512.548	256.883	211.445	236.051	398.895	404.618	171.968	183.377	194.327		0.889778	1.02974	1.08048	0.58268	0.517856	0.530704	0.773183	0.76715	0.384487	0.316478	0.353306	0.597041	0.605607	0.257391	0.274467	0.290857		+	3.04701	0.000184739	-0.876031	+	2.77235	0	-1.13651	+
367	P41223	BUD31	Protein BUD31 homolog OS=Homo sapiens OX=9606 GN=BUD31 PE=1 SV=2	4			648.619	840.673	921.65	658.553	637.335	625.088	388.372	512.371	389.781	385.234	412.913	361.771	400.971	259.187	254.679	281.237		0.807094	1.04607	1.14683	0.819455	0.793053	0.777814	0.483262	0.637557	0.485015	0.479357	0.513799	0.450161	0.498939	0.322513	0.316904	0.349951			0.954197	0.224163	-0.312575		0.462537	0.258578	-0.172568	+
368	Q13895	BYSL	Bystin OS=Homo sapiens OX=9606 GN=BYSL PE=1 SV=3	10			2574.09	3402.98	3465.15	2396.61	2296.27	2385.91	1577.47	1742.6	1330.71	1254.53	1510.62	1844.42	1866.98	1220.11	1278.28	1339.69		0.817845	1.0812	1.10095	0.761455	0.729575	0.758056	0.501197	0.553662	0.422796	0.398592	0.479957	0.586013	0.59318	0.387656	0.406138	0.425649			1.34439	0.0598387	-0.402984		1.04517	0.0452081	-0.284599	+
369	Q7L1Q6	BZW1	Basic leucine zipper and W2 domain-containing protein 1 OS=Homo sapiens OX=9606 GN=BZW1 PE=1 SV=1	5			767.087	993.514	1059.81	742.054	643.797	673.253	443.434	489.689	320.7	288.143	345.801	518.101	531.353	288.335	319.931	316.968		0.815931	1.05678	1.12729	0.789304	0.684791	0.716122	0.47167	0.52087	0.34112	0.30649	0.36782	0.551091	0.565187	0.306695	0.340303	0.337151			1.3382	0.0325455	-0.442795	+	1.79974	0.00130493	-0.554309	+
370	Q9Y6E2	BZW2	Basic leucine zipper and W2 domain-containing protein 2 OS=Homo sapiens OX=9606 GN=BZW2 PE=1 SV=1	2			713.549	963.577	957.036	766.163	628.002	663.913	353.7	391.606	278.466	253.329	280.674	454.288	487.246	312.844	329.408	309.838		0.812648	1.0974	1.08995	0.872569	0.71522	0.756119	0.402823	0.445993	0.31714	0.288512	0.319655	0.51738	0.554916	0.356292	0.375157	0.352869			0.978388	0.157022	-0.347524	+	1.9483	0.00313586	-0.460162	+
371	Q9H8K7	C10orf88	Uncharacterized protein C10orf88 OS=Homo sapiens OX=9606 GN=C10orf88 PE=1 SV=2	3			581.36	744.221	765.478	501.513	495.917	506.81	466.292	543.749	390.935	362.448	428.939	517.173	530.669	327.473	332.006	374.6		0.834065	1.06772	1.09822	0.719511	0.711482	0.72711	0.66898	0.780106	0.560867	0.519997	0.61539	0.741978	0.76134	0.469819	0.476322	0.537431			1.67171	0.018042	-0.464564		1.20723	0.0123245	-0.356929	+
372	C9JLR9	C11orf95	Uncharacterized protein C11orf95 OS=Homo sapiens OX=9606 GN=C11orf95 PE=1 SV=1	1			293.411	342.533	309.266	145.689	124.67	148.971	232.661	208.249	100.942	88.9143	116.287	204.775	193.712	67.3299	98.9433	83.4984		0.931257	1.08716	0.981579	0.462402	0.39569	0.472819	0.738442	0.660961	0.32038	0.282205	0.369083	0.649935	0.614822	0.213698	0.314036	0.265015		+	3.45373	0	-1.17399	+	2.25026	0	-1.1177	+
373	E9PRG8	C11orf98	Uncharacterized protein C11orf98 OS=Homo sapiens OX=9606 GN=C11orf98 PE=4 SV=1	6			1320.04	1355.43	1224.03	532.826	510.225	528.298	564.505	533.028	252.288	215.14	262.818	603.459	557.952	225.238	205.365	214.766		1.01555	1.04277	0.941682	0.409919	0.392531	0.406435	0.43429	0.410074	0.194093	0.165514	0.202194	0.464259	0.429249	0.173282	0.157993	0.165226		+	4.96847	0	-1.3102	+	2.67097	0	-1.17746	+
374	Q9HB07	C12orf10	UPF0160 protein MYG1, mitochondrial OS=Homo sapiens OX=9606 GN=C12orf10 PE=1 SV=2	4			440.927	558.779	587.187	435.029	378.672	375.879	375.236	411.863	291.751	276.793	323.795	402.509	434.717	294.302	282.747	320.784		0.833567	1.05636	1.11007	0.822417	0.715874	0.710594	0.709379	0.778621	0.551551	0.523273	0.61213	0.760938	0.821827	0.556374	0.534529	0.606438			1.31972	0.0563751	-0.408103	+	1.57527	0.00551308	-0.40544	+
375	Q8N5I9	C12orf45	Uncharacterized protein C12orf45 OS=Homo sapiens OX=9606 GN=C12orf45 PE=1 SV=2	1			28.9542	31.1923	32.7699	18.9601	15.2872	15.3244	41.218	40.5514	21.4173	10.6731	16.3412	51.1559	45.9062	17.419	18.2123	19.3214		0.934847	1.00711	1.05804	0.612166	0.493579	0.49478	1.33081	1.30929	0.691502	0.344603	0.52761	1.65168	1.48218	0.562409	0.588022	0.623832		+	2.85937	0.000203991	-0.912071	+	1.4653	0	-1.39776	+
376	Q96GQ5	C16orf58	RUS1 family protein C16orf58 OS=Homo sapiens OX=9606 GN=C16orf58 PE=1 SV=2	1			125.254	155.646	156.977	98.0938	93.7916	84.1557	82.163	99.4182	57.8695	59.2072	64.8846	94.4281	106.182	45.7313	50.1859	54.2292		0.858145	1.06637	1.07549	0.672064	0.642589	0.576571	0.562918	0.681138	0.396478	0.405643	0.44454	0.646949	0.727478	0.313316	0.343836	0.371537		+	2.20985	0.00157568	-0.660927	+	1.75272	0.00102021	-0.577182	+
377	Q32NC0	C18orf21	UPF0711 protein C18orf21 OS=Homo sapiens OX=9606 GN=C18orf21 PE=1 SV=1	1			247.894	287.742	291.749	159.885	143.177	166.89	173.714	178.05	85.5441	79.7022	76.3562	235.708	228.727	75.5017	81.5097	75.0498		0.898834	1.04332	1.05785	0.579724	0.519143	0.605123	0.629866	0.645588	0.310173	0.288991	0.276859	0.854649	0.829337	0.27376	0.295545	0.272122		+	2.90947	0.000484305	-0.815165	+	3.41857	0	-1.12842	+
378	Q96B23	C18orf25	Uncharacterized protein C18orf25 OS=Homo sapiens OX=9606 GN=C18orf25 PE=1 SV=3	1			28.4253	39.0836	40.502	19.5284	14.6628	20.573	22.4132	28.5917	12.7156	10.686	11.9086	24.9546	27.4156	16.0531	13.0788	13.2419		0.789512	1.08555	1.12494	0.542401	0.407259	0.571415	0.622526	0.794134	0.353175	0.296803	0.330761	0.693113	0.761468	0.445874	0.363263	0.367793		+	1.93125	0.000187755	-0.977749	+	2.19917	0	-1.10853	+
379	Q9UNZ5	C19orf53	Leydig cell tumor 10 kDa protein homolog OS=Homo sapiens OX=9606 GN=C19orf53 PE=1 SV=1	3			942.861	1440.15	1321.96	913.318	694.971	724.054	391.804	583.14	429.852	328.87	416.489	625.791	657.77	368.27	361.886	334.52		0.763456	1.16612	1.07042	0.739535	0.562734	0.586283	0.317253	0.472182	0.348061	0.266294	0.337241	0.506717	0.532611	0.298197	0.293027	0.270869		+	1.37025	0.00295552	-0.65521		0.46268	0.067449	-0.297109	+
380	Q96EU7	C1GALT1C1	C1GALT1-specific chaperone 1 OS=Homo sapiens OX=9606 GN=C1GALT1C1 PE=1 SV=1	1			87.5376	107.91	118.844	75.9553	62.1453	62.2117	59.3754	69.2773	47.0814	38.6361	47.3108	77.2554	73.7045	40.334	44.6131	48.2042		0.835571	1.03003	1.1344	0.725014	0.593194	0.593828	0.566755	0.661271	0.449405	0.368792	0.451595	0.737424	0.70353	0.384999	0.425844	0.460122		+	1.78631	0.00213511	-0.644892	+	1.43637	0.00158539	-0.538699	+
381	Q07021	C1QBP	Complement component 1 Q subcomponent-binding protein, mitochondrial OS=Homo sapiens OX=9606 GN=C1QBP PE=1 SV=1	8			1802.65	2185.76	2197.87	1426.23	1401.35	1431.59	968.402	1258.25	971.889	835.081	1005.93	1271.73	1356.04	914.578	846.421	1015.25		0.874184	1.05997	1.06584	0.691642	0.679576	0.694241	0.469621	0.610181	0.471312	0.404968	0.48782	0.616718	0.657604	0.443519	0.410467	0.492339		+	2.3116	0.00536463	-0.532573		0.573526	0.118422	-0.240088	+
382	P01024	C3	Complement C3 OS=Homo sapiens OX=9606 GN=C3 PE=1 SV=2	1			59.1057	68.0659	80.747	57.4911	45.1309	46.995	56.2696	50.7106	38.1103	40.1459	46.5187	56.6009	57.9479	35.707	33.4199	32.8389		0.85282	0.982104	1.16508	0.829523	0.651181	0.678078	0.811899	0.731689	0.549883	0.579254	0.671205	0.816679	0.836114	0.515206	0.482206	0.473823			1.3055	0.0210834	-0.471226		1.21899	0.0102474	-0.36624	+
383	Q7Z4R8	C6orf120	UPF0669 protein C6orf120 OS=Homo sapiens OX=9606 GN=C6orf120 PE=1 SV=1	2			139.462	239.352	271.703	257.428	198.331	212.831	74.0761	88.7898	90.5345	79.8131	84.2632	111.387	137.6	95.9649	121.21	131.811		0.643159	1.10382	1.25302	1.18718	0.914646	0.981516	0.341618	0.409473	0.417519	0.368075	0.388598	0.513685	0.634572	0.442563	0.558986	0.607875			0.0987079	0.805824	0.086917		0.201098	0.681096	0.063631
384	Q8WVR3	C7orf43	Uncharacterized protein C7orf43 OS=Homo sapiens OX=9606 GN=C7orf43 PE=1 SV=2	1			170.156	207.445	213.598	131.76	120.677	118.384	120.028	129.059	85.046	80.598	95.5735	123.241	142.162	70.9887	71.9769	74.064		0.863445	1.05267	1.08389	0.668607	0.612367	0.600732	0.609074	0.654901	0.43156	0.408989	0.484981	0.625378	0.721392	0.360227	0.365242	0.375833		+	2.37892	0.00136876	-0.667316	+	1.8398	0.00160279	-0.519096	+
385	Q9BRJ6	C7orf50	Uncharacterized protein C7orf50 OS=Homo sapiens OX=9606 GN=C7orf50 PE=1 SV=1	7			1330.39	1351.23	1193.56	436.876	408.013	422.102	1193.77	1134.46	455.184	417.169	446.186	1347.09	1335.86	435.459	398.658	372.206		1.02993	1.04606	0.924004	0.338211	0.315866	0.326773	0.924166	0.878251	0.352384	0.322955	0.345418	1.04286	1.03417	0.337114	0.308624	0.288146		+	4.85507	0	-1.61125	+	3.85228	0	-1.40578	+
386	Q9H7E9	C8orf33	UPF0488 protein C8orf33 OS=Homo sapiens OX=9606 GN=C8orf33 PE=1 SV=1	2			122.33	168.744	166.741	102.23	84.5985	87.5365	88.0688	67.202	56.2417	43.9287	55.626	66.7518	71.556	41.2312	36.2531	40.5458		0.801612	1.10576	1.09263	0.669899	0.554363	0.573615	0.577103	0.440366	0.368544	0.287859	0.36451	0.437416	0.468897	0.270182	0.237562	0.265691		+	1.8617	0.00083871	-0.728248	+	1.15271	0.00164129	-0.576046	+
387	Q8IXQ3	C9orf40	Uncharacterized protein C9orf40 OS=Homo sapiens OX=9606 GN=C9orf40 PE=1 SV=1	1			63.3998	76.6118	73.2271	40.4325	41.8364	37.4461	23.5426	28.6481	19.3467	17.0298	18.1458	27.5097	22.781	15.6646	14.4883	13.3318		0.891955	1.07783	1.03021	0.568834	0.588585	0.526819	0.331215	0.403043	0.272184	0.239588	0.255289	0.387027	0.3205	0.220381	0.203832	0.187562		+	3.02455	0.000334448	-0.829778	+	1.58288	0.00176971	-0.516928	+
388	P00918	CA2	Carbonic anhydrase 2 OS=Homo sapiens OX=9606 GN=CA2 PE=1 SV=2	1			156.096	94.1388	100.86	72.6437	77.1999	66.1768	76.0666	68.8565	61.4378	50.3645	59.7026	86.3616	97.6292	74.8796	69.8292	75.9205		1.33379	0.804388	0.861819	0.620719	0.65965	0.565461	0.649966	0.588358	0.524968	0.43035	0.510141	0.737934	0.834212	0.639824	0.59667	0.648718		+	1.31371	0.00276553	-0.66589		1.13741	0.0150501	-0.345652
389	Q9HB71	CACYBP	Calcyclin-binding protein OS=Homo sapiens OX=9606 GN=CACYBP PE=1 SV=2	7			1470.48	1735.59	1858.69	1413.81	1397.97	1303.12	875.115	917.206	706.106	677.88	737.281	1107.58	1156.92	814.327	762.856	885.83		0.871007	1.02804	1.10095	0.837439	0.828057	0.771875	0.518355	0.543287	0.418246	0.401527	0.436712	0.656051	0.685276	0.482349	0.451861	0.524702			1.28847	0.238409	-0.293703		2.15268	0.0102782	-0.342316	+
390	P27708	CAD	CAD protein OS=Homo sapiens OX=9606 GN=CAD PE=1 SV=3	11			4514.47	5457.45	4751.81	3924.64	3398.64	3458.19	1783.36	2290.47	1794.98	1770.38	2205.81	1638.91	1738.95	1064.62	1139.49	1322.5		0.919836	1.11197	0.968194	0.799656	0.692482	0.704616	0.363364	0.466689	0.365732	0.36072	0.44944	0.333932	0.354316	0.216919	0.232174	0.269463			1.89053	0.0201094	-0.447909		0.151864	0.627569	-0.0786757	+
391	P0DP23	CALM1	Calmodulin-1 OS=Homo sapiens OX=9606 GN=CALM1 PE=1 SV=1	7			1025.21	1227.55	1235.27	622.357	652.236	523.722	718.909	891.23	526.108	400.754	494.998	1046.42	987.606	472.298	419.642	441.675		0.881767	1.0558	1.06244	0.53528	0.560978	0.450445	0.618322	0.766533	0.452497	0.344682	0.42574	0.900009	0.849424	0.406216	0.360928	0.379878		+	2.73429	0.000237726	-0.956791	+	1.54813	0.00045221	-0.765637	+
392	P27797	CALR	Calreticulin OS=Homo sapiens OX=9606 GN=CALR PE=1 SV=1	8			628.059	733.284	769.5	569.619	562.838	568.044	425.001	468.549	373.101	346.56	397.385	615.486	668.746	488.601	444.637	535.479		0.88424	1.03239	1.08337	0.801963	0.792416	0.799745	0.598356	0.659667	0.525286	0.48792	0.559476	0.866539	0.941523	0.687898	0.626002	0.753897			1.64892	0.165983	-0.320158		1.20883	0.0598042	-0.26343	+
393	O43852	CALU	Calumenin OS=Homo sapiens OX=9606 GN=CALU PE=1 SV=2	3			233.035	286.704	282.88	175.301	173.736	167.892	174.973	241.548	154.747	131.818	157.297	235.434	257.039	184.559	167.07	168.647		0.87103	1.07163	1.05734	0.655234	0.649384	0.627541	0.654008	0.902849	0.578408	0.492705	0.587939	0.879997	0.960751	0.689838	0.624468	0.630363		+	2.51053	0.0017402	-0.628678	+	1.00405	0.00360949	-0.479071	+
394	Q13557	CAMK2D	Calcium/calmodulin-dependent protein kinase type II subunit delta OS=Homo sapiens OX=9606 GN=CAMK2D PE=1 SV=3	12			1596.81	2162.54	2166.69	1553	1314.45	1227.55	1830.59	2278.55	1845.94	1690.47	1863.77	1889.19	2187.8	1447.39	1417.38	1553.14		0.80837	1.09476	1.09687	0.786191	0.665428	0.621435	0.926718	1.15349	0.934489	0.855784	0.943515	0.956384	1.10755	0.732727	0.717535	0.786262			1.38189	0.0102298	-0.526038		0.591577	0.221143	-0.183544	+
395	Q13555	CAMK2G	Calcium/calmodulin-dependent protein kinase type II subunit gamma OS=Homo sapiens OX=9606 GN=CAMK2G PE=1 SV=4	15			2738.06	3757.59	3644.13	2626.07	2237.77	2133.82	2399.17	2951.45	2387.29	2354	2456.48	2670.47	3028.06	2038.15	2061.14	2178.63		0.810094	1.11174	1.07817	0.776961	0.662076	0.631321	0.709829	0.873229	0.706314	0.696465	0.726785	0.790097	0.895895	0.603016	0.609818	0.644579		+	1.43031	0.00963789	-0.52671		0.552686	0.311121	-0.149619	+
396	Q86VP6	CAND1	Cullin-associated NEDD8-dissociated protein 1 OS=Homo sapiens OX=9606 GN=CAND1 PE=1 SV=2	16			4278.88	5508.53	5741.03	3745.47	3463.29	3784.16	2800.54	3252.1	2409.15	2217.79	2841.98	2990.99	3166.65	1814.95	2090.01	2305.96		0.826654	1.06421	1.10913	0.723602	0.669087	0.731077	0.541047	0.628286	0.465433	0.428464	0.549053	0.577841	0.611777	0.350637	0.403777	0.445497			1.61157	0.0132621	-0.487649		0.774116	0.0540035	-0.285357	+
397	P27824	CANX	Calnexin OS=Homo sapiens OX=9606 GN=CANX PE=1 SV=2	16			1487.65	1888.53	1982.67	1519.22	1346.49	1437.62	1269.34	1363.23	906.522	755.818	867.452	1641.01	1658.23	923.022	1033.78	1130.43		0.832819	1.05724	1.10994	0.850492	0.753794	0.804811	0.710604	0.763166	0.507491	0.423123	0.485618	0.918673	0.928313	0.516728	0.578732	0.632839			1.04889	0.226805	-0.307176	+	2.01766	0.00110112	-0.64576	+
398	Q01518	CAP1	Adenylyl cyclase-associated protein 1 OS=Homo sapiens OX=9606 GN=CAP1 PE=1 SV=5	12			1733.76	2333.49	2289.5	1791.48	1731.11	1547.26	1762.51	1936.24	1726.4	1491.83	1650.42	2677.57	2719	2391.77	2197.9	2217.29		0.818229	1.10127	1.0805	0.84547	0.816979	0.730213	0.831798	0.913788	0.814756	0.704053	0.778898	1.26365	1.2832	1.12877	1.03728	1.04643			0.971511	0.216033	-0.316287		0.854109	0.191234	-0.18955
399	P40121	CAPG	Macrophage-capping protein OS=Homo sapiens OX=9606 GN=CAPG PE=1 SV=2	3			124.384	190.092	201.207	120.067	116.179	114.946	127.854	155.966	113.917	103.41	125.871	165.673	201.192	130.079	124.019	132.531		0.723607	1.10587	1.17053	0.698493	0.675875	0.668702	0.743794	0.907336	0.662715	0.601591	0.732258	0.963807	1.17044	0.756738	0.721484	0.771003			1.11937	0.0131801	-0.523011		0.877828	0.0330078	-0.308429	+
400	P07384	CAPN1	Calpain-1 catalytic subunit OS=Homo sapiens OX=9606 GN=CAPN1 PE=1 SV=1	11			1583.03	2021.51	2165.42	1480.35	1457.29	1520.9	1653.63	1842.35	1340.58	1291.05	1564.44	1627.84	1797.48	1062.98	1199.69	1271.88		0.823072	1.05105	1.12588	0.769685	0.757695	0.790768	0.859779	0.957901	0.697013	0.671261	0.813406	0.84637	0.934571	0.55268	0.62376	0.661294			1.22122	0.118413	-0.359539		1.10212	0.0213865	-0.324576	+
401	P17655	CAPN2	Calpain-2 catalytic subunit OS=Homo sapiens OX=9606 GN=CAPN2 PE=1 SV=6	13			2409.81	2932.18	3185.14	2017.83	1736.52	1819.04	2073.78	2324.43	1580.62	1486.5	1733.28	2139.57	2130.63	1150.85	1182.95	1465.98		0.847815	1.03159	1.12059	0.709909	0.610939	0.639971	0.729594	0.817777	0.556091	0.522978	0.6098	0.75274	0.749595	0.40489	0.416183	0.515759		+	1.95897	0.00302374	-0.60669	+	1.67416	0.00332103	-0.459265	+
402	Q9Y6W3	CAPN7	Calpain-7 OS=Homo sapiens OX=9606 GN=CAPN7 PE=1 SV=1	3			711.095	868.379	944.097	534.09	432.021	460.307	543.79	629.318	405.727	403.502	455.145	537.545	574.116	326.676	309.938	365.652		0.845344	1.03232	1.12233	0.634922	0.513583	0.547209	0.646453	0.748128	0.482325	0.47968	0.541073	0.639029	0.682504	0.38835	0.368452	0.434684		+	2.24669	0.000410127	-0.818841	+	1.66994	0.0030188	-0.475282	+
403	P04632	CAPNS1	Calpain small subunit 1 OS=Homo sapiens OX=9606 GN=CAPNS1 PE=1 SV=1	9			1062.14	1378.98	1380.13	840.642	764.444	749.999	1011.04	1097.39	648.851	614.769	721.423	1007.46	1104.56	473.287	589.891	587.7		0.833868	1.08261	1.08352	0.659974	0.600152	0.588812	0.793751	0.861543	0.509402	0.482645	0.566377	0.79094	0.867172	0.37157	0.463114	0.461394		+	2.15064	0.00128011	-0.689458	+	2.20103	0.000577657	-0.673961	+
404	Q14444	CAPRIN1	Caprin-1 OS=Homo sapiens OX=9606 GN=CAPRIN1 PE=1 SV=2	9			2213.86	2737.72	2829.36	2033.64	1729.71	1772.34	1844.65	2032.15	1447.75	1244.68	1288.42	2034.81	2012.61	1412.69	1328.32	1533.18		0.85357	1.05555	1.09088	0.784085	0.666903	0.683339	0.711219	0.783511	0.558191	0.479896	0.49676	0.784536	0.775977	0.544673	0.512144	0.591129			1.66951	0.0130721	-0.486588	+	1.92526	0.0013042	-0.548114	+
405	P52907	CAPZA1	F-actin-capping protein subunit alpha-1 OS=Homo sapiens OX=9606 GN=CAPZA1 PE=1 SV=3	8			943.066	1175.31	1198.4	802.559	743.153	697.521	713.359	804.171	557.359	482.725	590.383	830.283	852.319	583.927	522.653	617.636		0.852996	1.06306	1.08394	0.725909	0.672177	0.630903	0.645228	0.727367	0.504127	0.436621	0.533997	0.750985	0.770916	0.528158	0.472736	0.558647		+	1.95038	0.00482816	-0.558288	+	1.48227	0.00301237	-0.483912	+
406	P47755	CAPZA2	F-actin-capping protein subunit alpha-2 OS=Homo sapiens OX=9606 GN=CAPZA2 PE=1 SV=3	5			623.697	799.647	818.682	487.642	467.263	474.611	476.685	550.675	370.68	326.575	381.758	544.051	574.101	365.577	313.654	389.239		0.834554	1.06999	1.09546	0.652502	0.625233	0.635065	0.637841	0.736845	0.495998	0.436982	0.510821	0.727981	0.76819	0.48917	0.419693	0.520831		+	2.137	0.00175163	-0.638903	+	1.64777	0.00177225	-0.513703	+
407	P47756	CAPZB	F-actin-capping protein subunit beta OS=Homo sapiens OX=9606 GN=CAPZB PE=1 SV=4	5			762.115	973.202	1009.6	723.168	683.736	673.389	535.382	646.909	481.386	453.791	507.682	689.506	724.614	534.47	489.045	539.684		0.832938	1.06364	1.10342	0.790371	0.747275	0.735967	0.585135	0.707026	0.526121	0.495961	0.55486	0.753581	0.791952	0.584138	0.534492	0.589836			1.38681	0.0720134	-0.38975		1.04703	0.0383668	-0.292683	+
408	Q9BWT7	CARD10	Caspase recruitment domain-containing protein 10 OS=Homo sapiens OX=9606 GN=CARD10 PE=1 SV=2	2			220.846	260.544	291.729	176.646	158.079	169.567	150.469	170.12	106.154	92.2335	108.533	150.651	130.814	75.7369	81.0722	78.1137		0.856968	1.01101	1.13202	0.685455	0.613408	0.657985	0.583878	0.660131	0.411918	0.357902	0.42115	0.584584	0.507609	0.293888	0.314591	0.303111		+	2.07698	0.002635	-0.608611	+	1.95159	0.00109936	-0.648791	+
409	Q86X55	CARM1	Histone-arginine methyltransferase CARM1 OS=Homo sapiens OX=9606 GN=CARM1 PE=1 SV=3	7			2194.09	3051.48	2904.27	1617.88	1458.42	1565.54	1002.61	1192.41	795.385	705.895	910.354	1149.05	1069.76	657.827	601.026	696.642		0.807656	1.12327	1.06908	0.59555	0.536852	0.576284	0.369066	0.438933	0.292786	0.259844	0.335106	0.422971	0.393784	0.24215	0.221241	0.256438		+	2.17574	0.000477064	-0.798712	+	1.142	0.00408006	-0.45157	+
410	P49589	CARS	Cysteine--tRNA ligase, cytoplasmic OS=Homo sapiens OX=9606 GN=CARS PE=1 SV=3	5			765.048	975.81	1049.13	695.413	649.336	596.802	576.339	621.563	430.46	403.912	438.34	741.692	711.141	516.223	531.506	519.71		0.822636	1.04926	1.1281	0.747759	0.698214	0.641725	0.619722	0.66835	0.462862	0.434316	0.471335	0.797522	0.764671	0.555081	0.571514	0.55883			1.5558	0.0103267	-0.513061	+	2.40327	0.00158461	-0.497419	+
411	O15234	CASC3	Protein CASC3 OS=Homo sapiens OX=9606 GN=CASC3 PE=1 SV=2	7			1215.97	1761.63	1893.24	1467.73	1306.51	1282.56	469.896	690.687	604.625	538.426	581.651	803.289	936.88	926.817	779.009	780.102		0.748928	1.08501	1.16607	0.90399	0.804693	0.789942	0.289414	0.425401	0.372395	0.331622	0.358245	0.494754	0.577034	0.570836	0.4798	0.480473			0.508702	0.389647	-0.240515		0.0172182	0.946865	0.0114607
412	P55210	CASP7	Caspase-7 OS=Homo sapiens OX=9606 GN=CASP7 PE=1 SV=1	3			291.263	349.315	395.107	220.812	194.279	187.713	220.042	245.055	157.477	133.998	167.635	192.469	220.94	114.288	127.325	124.59		0.843682	1.01184	1.14448	0.639611	0.562755	0.543736	0.637381	0.709835	0.456153	0.388143	0.485577	0.557512	0.639982	0.33105	0.368814	0.360892		+	2.21107	0.000629857	-0.773206	+	1.67125	0.00111429	-0.607884	+
413	Q14790	CASP8	Caspase-8 OS=Homo sapiens OX=9606 GN=CASP8 PE=1 SV=1	8			1486.93	2005.32	2066.38	1193.61	1109.64	1084.14	1091.57	1319.9	835.09	787.304	960.298	1134	1218.31	650.013	711.981	776.327		0.802498	1.08227	1.11523	0.644193	0.598874	0.585112	0.589122	0.712352	0.450699	0.424909	0.518274	0.612021	0.657524	0.350813	0.384257	0.418985		+	1.95069	0.00126555	-0.700434	+	1.31783	0.00325418	-0.484566	+
414	P20810	CAST	Calpastatin OS=Homo sapiens OX=9606 GN=CAST PE=1 SV=4	6			508.033	576.005	626.098	465.248	453.849	413.721	500.847	522.553	437.186	414.252	432.123	792.251	808.4	617.789	589.188	653.517		0.891215	1.01045	1.09833	0.81616	0.796163	0.725769	0.878609	0.916687	0.766932	0.7267	0.75805	1.3898	1.41813	1.08375	1.03358	1.14643			1.60549	0.105073	-0.356174		2.18362	0.0520825	-0.258241	+
415	P04040	CAT	Catalase OS=Homo sapiens OX=9606 GN=CAT PE=1 SV=3	4			965.731	1243.6	1105.03	798.825	708.221	679.094	864.348	934.456	697.582	604.332	628.532	1288.07	1216.84	955.109	1018.72	921.386		0.874133	1.12565	1.00022	0.723058	0.641048	0.614683	0.782366	0.845825	0.631418	0.547012	0.568917	1.1659	1.10142	0.864519	0.922096	0.833994		+	2.03353	0.00322719	-0.596132	+	1.90021	0.00222742	-0.484639	+
416	Q03135	CAV1	Caveolin-1 OS=Homo sapiens OX=9606 GN=CAV1 PE=1 SV=4	15			1823.65	3133.36	3262.28	2782.79	2535.1	2665.19	2017.12	2700.96	2363.12	1856.13	1997.85	2373.38	2568.45	2233.25	2203.05	2522.78		0.665623	1.14366	1.19072	1.0157	0.925299	0.972781	0.736239	0.985837	0.862527	0.677478	0.729205	0.866272	0.937471	0.815125	0.804102	0.920802			0.00495152	0.992034	0.00413104		0.348473	0.262697	-0.179072
417	P51636	CAV2	Caveolin-2 OS=Homo sapiens OX=9606 GN=CAV2 PE=1 SV=2	5			667.185	978.073	1058.17	681.574	604.043	621.785	747.198	800.035	531.71	413.199	478.727	823.482	800.849	462.384	541.144	481.929		0.740377	1.08537	1.17425	0.756344	0.670308	0.689996	0.829167	0.887801	0.59004	0.458528	0.531244	0.91382	0.888704	0.513109	0.600509	0.534798			1.05714	0.0261594	-0.477197	+	1.82359	0.0006	-0.711884	+
418	Q6NZI2	CAVIN1	Caveolae-associated protein 1 OS=Homo sapiens OX=9606 GN=CAVIN1 PE=1 SV=1	13			1007.51	1423.79	1513.88	1195.79	1012.94	1131.85	2569.86	3336.14	3051.54	2287.78	2283.23	2165.46	2492.55	2231.83	2297.54	2660.05		0.766132	1.08268	1.15119	0.909305	0.770261	0.860683	1.95418	2.53687	2.32046	1.73968	1.73622	1.64666	1.89539	1.69713	1.7471	2.02276			0.492034	0.418625	-0.221195		0.38892	0.178353	-0.218414
419	Q969G5	CAVIN3	Caveolae-associated protein 3 OS=Homo sapiens OX=9606 GN=CAVIN3 PE=1 SV=3	10			245.556	382.704	431.93	325.401	265.979	234.325	878.221	1356.22	984.24	744.672	1016.48	942.516	1133.95	798.048	850.409	873.06		0.694845	1.08293	1.22222	0.920781	0.752636	0.663065	2.48509	3.83767	2.78509	2.10718	2.87631	2.66702	3.20872	2.25822	2.40639	2.47048			0.516513	0.251689	-0.333679		0.362094	0.113777	-0.267677
420	Q13951	CBFB	Core-binding factor subunit beta OS=Homo sapiens OX=9606 GN=CBFB PE=1 SV=2	3			141.004	176.834	179.99	74.249	59.5453	62.914	84.6782	113.654	48.819	42.0824	67.4426	82.9526	88.4471	30.2126	36.6832	39.4725		0.849715	1.06563	1.08465	0.447438	0.358831	0.379131	0.510286	0.684899	0.294192	0.253596	0.406421	0.499887	0.532998	0.182066	0.221059	0.237868		+	3.07643	0	-1.33736	+	1.2521	0.000165554	-0.922844	+
421	Q9BRT8	CBWD1	COBW domain-containing protein 1 OS=Homo sapiens OX=9606 GN=CBWD1 PE=2 SV=1	3			795.296	957.632	1097.77	632.262	569.728	548.321	420.732	470.676	301.823	267.843	328.289	451.031	453.647	253.721	235.449	296.645		0.836949	1.00779	1.15526	0.665376	0.599567	0.577039	0.442767	0.495327	0.317631	0.281871	0.345483	0.474653	0.477406	0.267009	0.24778	0.312181		+	2.02651	0.00132533	-0.693883	+	1.71462	0.00111584	-0.577132	+
422	P83916	CBX1	Chromobox protein homolog 1 OS=Homo sapiens OX=9606 GN=CBX1 PE=1 SV=1	5			1132.48	1396.73	1472.06	866.47	821.173	822.712	714.457	772.637	491.065	440.03	521.195	856.465	859.326	436.257	472.619	470.747		0.84909	1.04722	1.10369	0.649646	0.615684	0.616838	0.535673	0.579294	0.368182	0.329918	0.390772	0.642145	0.64429	0.327089	0.354352	0.352948		+	2.30486	0.00151256	-0.663979	+	2.05797	0.00114201	-0.621539	+
423	Q14781	CBX2	Chromobox protein homolog 2 OS=Homo sapiens OX=9606 GN=CBX2 PE=1 SV=2	2			1533.81	1730.28	1132.4	932.742	946.212	991.376	997.584	990.753	469.915	419.453	447.09	911.456	861.063	351.512	370.552	383.475		1.04661	1.18068	0.772707	0.636468	0.64566	0.676478	0.680714	0.676053	0.320652	0.286219	0.305077	0.621943	0.587557	0.239859	0.252851	0.261669		+	1.494	0.00444968	-0.593406	+	3.49055	0	-1.15966	+
424	Q13185	CBX3	Chromobox protein homolog 3 OS=Homo sapiens OX=9606 GN=CBX3 PE=1 SV=4	7			1940.36	2334.36	2400.27	1419.06	1410.3	1415.34	1203.14	1337.42	807.169	757.706	878.557	1412.54	1457.59	747.835	733.905	815.546		0.872073	1.04915	1.07877	0.637781	0.633844	0.636109	0.540738	0.601089	0.362773	0.340543	0.394858	0.63485	0.655098	0.336106	0.329845	0.366538		+	2.59155	0.00154131	-0.646821	+	2.13994	0.00111273	-0.641842	+
425	O00257	CBX4	E3 SUMO-protein ligase CBX4 OS=Homo sapiens OX=9606 GN=CBX4 PE=1 SV=3	3			351.367	447.542	481.727	272.449	270.434	274.295	281.617	281.867	172.401	172.994	186.592	267.088	271.48	142.605	129.439	147.195		0.823107	1.04841	1.12849	0.638235	0.633515	0.64256	0.659712	0.660298	0.403864	0.405253	0.437108	0.625677	0.635965	0.334064	0.303222	0.344817		+	2.0041	0.00195203	-0.635409	+	3.09474	0.000444444	-0.668915	+
426	P45973	CBX5	Chromobox protein homolog 5 OS=Homo sapiens OX=9606 GN=CBX5 PE=1 SV=1	4			956.78	1130.55	1131.07	668.359	592.338	633.376	981.454	1023.57	605.738	552.896	672.537	907.88	896.373	484.891	464.084	519.647		0.891853	1.05383	1.05432	0.623004	0.552142	0.590395	0.914853	0.954111	0.564633	0.515377	0.626899	0.846271	0.835545	0.451986	0.432591	0.484384		+	2.88546	0.000377622	-0.762217	+	2.16491	0.000468085	-0.720124	+
427	O95503	CBX6	Chromobox protein homolog 6 OS=Homo sapiens OX=9606 GN=CBX6 PE=1 SV=1	5			1187.79	1386.02	1370.93	688.014	678.083	687.498	1163.69	1048.53	515.572	479.745	470.832	1012.31	961.898	411.38	358.013	372.228		0.903322	1.05408	1.0426	0.523239	0.515686	0.522847	0.884994	0.797414	0.392096	0.364849	0.358071	0.769868	0.73153	0.312857	0.272271	0.283082		+	3.69736	0	-0.938304	+	3.23146	0	-1.17758	+
428	Q9HC52	CBX8	Chromobox protein homolog 8 OS=Homo sapiens OX=9606 GN=CBX8 PE=1 SV=3	3			361.735	409.023	515.139	265.049	224.467	240.551	327.697	354.517	217.615	194.769	225.951	259.409	284.704	144.773	139.677	171.015		0.843928	0.954251	1.20182	0.61836	0.523682	0.561206	0.764518	0.827089	0.507696	0.454396	0.527144	0.605202	0.664215	0.337756	0.325867	0.398978		+	2.08776	0.000472191	-0.804324	+	2.27946	0.000416667	-0.682591	+
429	Q6P1N0	CC2D1A	Coiled-coil and C2 domain-containing protein 1A OS=Homo sapiens OX=9606 GN=CC2D1A PE=1 SV=1	3			387.349	519.327	559.13	363.321	326.331	311.976	473.641	479.409	363.901	345.789	408.861	462.534	500.091	356.638	346.47	370.006		0.79277	1.06288	1.14435	0.743593	0.667887	0.638507	0.96938	0.981185	0.74478	0.707711	0.836798	0.946648	1.02351	0.729915	0.709105	0.757275		+	1.42722	0.00880356	-0.534815	+	1.51294	0.00979351	-0.357509	+
430	Q8IX12	CCAR1	Cell division cycle and apoptosis regulator protein 1 OS=Homo sapiens OX=9606 GN=CCAR1 PE=1 SV=2	5			809.821	1009.66	1067.44	706.814	576.751	603.693	664.181	639.634	450.107	430.497	460.266	691.76	705.058	520.096	463.531	475.24		0.841541	1.04921	1.10925	0.734499	0.599342	0.627339	0.690197	0.664688	0.467737	0.447359	0.478294	0.718856	0.732675	0.540468	0.481687	0.493855		+	1.80693	0.00322569	-0.608797	+	3.00991	0.00105405	-0.544832	+
431	Q8N163	CCAR2	Cell cycle and apoptosis regulator protein 2 OS=Homo sapiens OX=9606 GN=CCAR2 PE=1 SV=2	10			1153.34	1419.97	1564.59	917.404	835.487	846.269	666.689	833.293	549.239	535.685	649.339	713.163	729.324	421.264	454.804	492.768		0.836178	1.02949	1.13434	0.665123	0.605733	0.61355	0.483353	0.604142	0.398201	0.388375	0.470774	0.517047	0.528764	0.305419	0.329735	0.357259		+	2.07592	0.00158544	-0.660652		0.963734	0.0118943	-0.371989	+
432	Q8WUD4	CCDC12	Coiled-coil domain-containing protein 12 OS=Homo sapiens OX=9606 GN=CCDC12 PE=1 SV=1	3			909.381	1154.96	1117.71	952.552	871.047	873.237	459.067	583.583	441.159	443.629	478.916	448.757	527.505	318.546	328.217	342.419		0.857354	1.08888	1.05376	0.898055	0.821213	0.823278	0.432803	0.550195	0.415919	0.418248	0.451516	0.423083	0.497325	0.300321	0.309439	0.322829			0.935541	0.372328	-0.232069		0.575023	0.21228	-0.188346	+
433	Q96CT7	CCDC124	Coiled-coil domain-containing protein 124 OS=Homo sapiens OX=9606 GN=CCDC124 PE=1 SV=1	10			4297.43	5131.17	3371.58	841.429	962.845	1292.77	701.557	648.793	475.821	405.303	509.986	1663.66	1416.66	686.187	834.987	1594.84		1.0072	1.2026	0.790203	0.197207	0.225664	0.302989	0.164425	0.152059	0.111519	0.0949916	0.119526	0.389915	0.332025	0.160823	0.195697	0.373785		+	2.89533	0	-2.04981	+	1.58115	0.00149605	-0.547534	+
434	Q6PK04	CCDC137	Coiled-coil domain-containing protein 137 OS=Homo sapiens OX=9606 GN=CCDC137 PE=1 SV=1	10			2589.52	2825.91	2423.93	1003.69	1029.28	1025.68	1836.17	1704.67	793.566	704.61	716.413	2349.71	2171.28	906.496	824.859	725.187		0.990969	1.08143	0.9276	0.384096	0.393889	0.392512	0.702673	0.65235	0.303685	0.269643	0.27416	0.899197	0.830915	0.346902	0.315661	0.277518		+	4.50186	0	-1.35507	+	3.25878	0	-1.26304	+
435	O60826	CCDC22	Coiled-coil domain-containing protein 22 OS=Homo sapiens OX=9606 GN=CCDC22 PE=1 SV=1	4			200.121	251.333	253.979	158.878	160.111	140.411	155.729	163.505	107.231	98.8595	117.326	165.744	156.6	88.9572	97.1719	112.448		0.851056	1.06885	1.0801	0.675662	0.680905	0.597127	0.66227	0.695339	0.456022	0.420421	0.498953	0.704861	0.665974	0.378309	0.413244	0.478208		+	2.06081	0.00256039	-0.612845	+	2.0214	0.00104253	-0.569287	+
436	Q96A33	CCDC47	Coiled-coil domain-containing protein 47 OS=Homo sapiens OX=9606 GN=CCDC47 PE=1 SV=1	8			1706.53	2197.82	2297.87	1252.83	1147.39	1212.74	1009.68	1017.86	561.249	557.102	698.222	1320.61	1149.04	466.98	520.567	526.364		0.825445	1.06308	1.11147	0.605991	0.55499	0.5866	0.48838	0.492337	0.271475	0.269469	0.337728	0.638776	0.555788	0.225877	0.251797	0.254601		+	2.2851	0.000633094	-0.76854	+	1.91512	0.000493274	-0.751557	+
437	Q9P031	CCDC59	Thyroid transcription factor 1-associated protein 26 OS=Homo sapiens OX=9606 GN=CCDC59 PE=1 SV=2	4			825.462	876.392	804.513	376.027	414.251	385.895	490.923	477.78	273.774	226.898	252.148	632.014	579.997	281.432	270.516	269.952		0.988038	1.049	0.962963	0.450086	0.495838	0.461898	0.587611	0.57188	0.327694	0.271586	0.301809	0.75649	0.694228	0.33686	0.323795	0.323119		+	4.40462	0	-1.09178	+	2.58195	0.000276169	-0.952822	+
438	Q16204	CCDC6	Coiled-coil domain-containing protein 6 OS=Homo sapiens OX=9606 GN=CCDC6 PE=1 SV=2	1			25.8455	27.3346	27.0398	17.1823	20.8454	22.9965	13.4645	18.3277	11.074	9.25191	11.6183	23.2272	17.5605	13.1333	12.5263	18.7266		0.966549	1.02224	1.01121	0.64257	0.77956	0.860005	0.503535	0.685405	0.414137	0.345996	0.434492	0.868632	0.656714	0.491149	0.468449	0.700322			1.48753	0.052983	-0.404553	+	1.13279	0.00159246	-0.567794	+
439	Q9H6F5	CCDC86	Coiled-coil domain-containing protein 86 OS=Homo sapiens OX=9606 GN=CCDC86 PE=1 SV=1	8			2145.7	2439.94	2060.29	1312.55	1234.62	1356.34	1398.77	1474.91	859.089	778.112	1031.6	1293.68	1326.36	720.369	672.313	721.56		0.968578	1.1014	0.930023	0.59249	0.557313	0.612257	0.631411	0.66578	0.387796	0.351243	0.465668	0.583972	0.598724	0.325178	0.303485	0.325715		+	3.10159	0.000397546	-0.764994	+	1.68355	0.00056433	-0.701122	+
440	P24385	CCND1	G1/S-specific cyclin-D1 OS=Homo sapiens OX=9606 GN=CCND1 PE=1 SV=1	3			568.999	726.755	767.685	307.209	247.79	238.616	920.063	917.149	357.184	293.216	330.35	842.475	851.836	336.949	330.229	307.407		0.827258	1.05662	1.11612	0.446646	0.360258	0.34692	1.33766	1.33343	0.519304	0.426302	0.48029	1.22486	1.23847	0.489885	0.480115	0.446934		+	2.85184	0	-1.37579	+	3.10187	0	-1.49524	+
441	O60563	CCNT1	Cyclin-T1 OS=Homo sapiens OX=9606 GN=CCNT1 PE=1 SV=1	5			660.998	846.056	864.901	521.111	465.69	493.04	459.497	509.832	311.186	310.386	367.69	439.839	435.886	229.177	248.418	261.22		0.836017	1.07007	1.09391	0.65909	0.588995	0.623587	0.581162	0.644825	0.393582	0.39257	0.465047	0.556299	0.5513	0.289858	0.314194	0.330386		+	2.1426	0.00156544	-0.671756	+	1.74306	0.00130787	-0.558262	+
442	P78371	CCT2	T-complex protein 1 subunit beta OS=Homo sapiens OX=9606 GN=CCT2 PE=1 SV=4	13			3383.89	4070.73	4263.23	2625.69	2304.13	2281.47	1892.13	2302.32	1566.74	1499.81	1790.86	1956.76	2023.36	1100.96	1173.97	1295.37		0.866342	1.04219	1.09147	0.672228	0.589903	0.584101	0.484422	0.589439	0.401116	0.383981	0.458495	0.500969	0.51802	0.281867	0.300559	0.33164		+	2.34511	0.000843658	-0.696345		1.07842	0.0107845	-0.370484	+
443	P49368	CCT3	T-complex protein 1 subunit gamma OS=Homo sapiens OX=9606 GN=CCT3 PE=1 SV=4	14			2308.95	2822.98	3022.47	2054.57	1836.12	1782	1430.74	1700.22	1294.44	1243.46	1471.26	1413.02	1532.12	970.033	908.579	1132.3		0.849462	1.03857	1.11197	0.755875	0.675508	0.655597	0.526369	0.62551	0.476224	0.457468	0.541276	0.519849	0.563666	0.356875	0.334266	0.416573		+	1.75899	0.00863911	-0.517063		0.731758	0.126374	-0.226661	+
444	P50991	CCT4	T-complex protein 1 subunit delta OS=Homo sapiens OX=9606 GN=CCT4 PE=1 SV=4	14			2810.82	3607.33	3822.01	2460.79	2199.27	2091.37	1508.07	1951.94	1401.22	1299.99	1659.73	1620.31	1758.71	1062.36	1098.77	1245.24		0.82347	1.05682	1.11971	0.720923	0.644307	0.612696	0.44181	0.571848	0.410507	0.38085	0.486241	0.474693	0.515239	0.311233	0.3219	0.364811		+	1.74721	0.00390718	-0.591887		0.535311	0.113105	-0.246762	+
445	P48643	CCT5	T-complex protein 1 subunit epsilon OS=Homo sapiens OX=9606 GN=CCT5 PE=1 SV=1	12			3429.54	4268.62	4059.25	2765.7	2396.38	2424.96	1939.55	2328.56	1631.15	1589.32	1946.31	1935.73	2081.59	1208.6	1192.51	1380.16		0.875075	1.08917	1.03575	0.705691	0.611456	0.618749	0.494892	0.594151	0.416201	0.405528	0.496617	0.493917	0.531135	0.308384	0.304279	0.352159		+	2.24779	0.0019496	-0.628845		0.859338	0.0332049	-0.309233	+
446	P40227	CCT6A	T-complex protein 1 subunit zeta OS=Homo sapiens OX=9606 GN=CCT6A PE=1 SV=3	12			2876.22	3546.48	3684.48	2353.51	2089.34	2086.33	1504.84	1900.35	1412.75	1371.27	1685.13	1569.48	1665.4	1033.95	1106.47	1238.71		0.853716	1.05266	1.09362	0.698566	0.620155	0.619262	0.446665	0.564059	0.419331	0.407019	0.500178	0.465851	0.494322	0.306896	0.328421	0.367672		+	2.12265	0.00218814	-0.624398		0.448983	0.224398	-0.188978	+
447	Q99832	CCT7	T-complex protein 1 subunit eta OS=Homo sapiens OX=9606 GN=CCT7 PE=1 SV=2	17			4440.52	5616.07	5505.31	3693.82	3314.86	3370.4	2459.51	2982.26	2201.66	2126.36	2571.81	2523.75	2717.92	1595.19	1687.83	1904.68		0.856037	1.08266	1.06131	0.712089	0.639034	0.649741	0.474141	0.574916	0.424433	0.409917	0.49579	0.486525	0.523957	0.307518	0.325377	0.367181		+	2.08323	0.00375709	-0.578044		0.683004	0.108935	-0.240801	+
448	P50990	CCT8	T-complex protein 1 subunit theta OS=Homo sapiens OX=9606 GN=CCT8 PE=1 SV=4	14			4291.61	5392.55	5067.38	3575.52	3286.34	3282.81	2269.67	2896.37	2187.67	2095.18	2536.61	2297.31	2538.49	1584.31	1582.99	1890.15		0.872779	1.09668	1.03055	0.727148	0.668338	0.66762	0.46158	0.589031	0.444903	0.426094	0.515867	0.467201	0.516249	0.322199	0.32193	0.384397		+	2.13233	0.00570695	-0.53472		0.431762	0.248788	-0.178574	+
449	P86790	CCZ1B	Vacuolar fusion protein CCZ1 homolog B OS=Homo sapiens OX=9606 GN=CCZ1B PE=1 SV=1	1			98.1363	118.887	137.155	80.5087	78.4774	63.4661	48.4201	65.3204	40.2575	39.9918	46.3615	62.7047	62.7837	35.5881	40.6128	43.9548		0.831245	1.00701	1.16175	0.681934	0.664728	0.537578	0.410133	0.553284	0.340994	0.338743	0.392696	0.531128	0.531797	0.301442	0.344003	0.372311		+	1.70224	0.00174026	-0.665544	+	0.965188	0.00745796	-0.417607	+
450	Q6YHK3	CD109	CD109 antigen OS=Homo sapiens OX=9606 GN=CD109 PE=1 SV=2	12			2101.49	2587.46	2707.93	2127.49	1909.54	2260.28	2159.22	2655.05	1604.39	1312.03	1587.79	3046.85	2862.82	1986.5	1903.97	2683.75		0.852315	1.04941	1.09827	0.86286	0.774464	0.916716	0.875729	1.07683	0.650703	0.532128	0.64397	1.23573	1.16109	0.805678	0.772205	1.08847			0.786764	0.387396	-0.227087	+	1.58648	0.00110645	-0.679343	+
451	Q5ZPR3	CD276	CD276 antigen OS=Homo sapiens OX=9606 GN=CD276 PE=1 SV=1	1			84.2654	106.632	124.837	97.7874	79.5526	81.6414	58.1942	75.5544	46.3355	40.88	46.4414	89.7644	89.5501	59.4819	62.0426	59.9898		0.800661	1.01318	1.18616	0.929142	0.755882	0.775729	0.552941	0.717892	0.440264	0.388428	0.44127	0.852911	0.850874	0.565177	0.589508	0.570003			0.65291	0.326165	-0.273541	+	1.42938	0.00129477	-0.576221	+
452	O95400	CD2BP2	CD2 antigen cytoplasmic tail-binding protein 2 OS=Homo sapiens OX=9606 GN=CD2BP2 PE=1 SV=1	11			2627.1	3293.33	3429.81	2229.74	2123.9	2257	1546.85	1878.9	1355.23	1203.9	1489.61	1745.44	1818.42	1025.41	1141.56	1291.14		0.842898	1.05666	1.10045	0.715406	0.681448	0.724153	0.496303	0.60284	0.434822	0.386268	0.477937	0.56002	0.583435	0.329	0.366267	0.414259			1.79405	0.0111395	-0.49105		0.941387	0.0188075	-0.342548	+
453	O15446	CD3EAP	DNA-directed RNA polymerase I subunit RPA34 OS=Homo sapiens OX=9606 GN=CD3EAP PE=1 SV=1	13			4090.64	4989.72	4685.38	2528.32	2187.77	2418.88	4429.89	3971.72	1740.94	1516.36	1665.3	3651.41	3194.94	1034.25	1067.24	1147.33		0.891483	1.08742	1.0211	0.551003	0.476786	0.527152	0.965416	0.865566	0.379407	0.330464	0.362923	0.79576	0.696281	0.225397	0.232586	0.25004		+	3.0797	0.000246649	-0.945824	+	3.11624	0	-1.35643	+
454	P16070	CD44	CD44 antigen OS=Homo sapiens OX=9606 GN=CD44 PE=1 SV=3	7			1897.55	2594.34	2458.91	2540.07	2000.82	2910.44	1303.07	1934.95	1445	1285.1	1365.16	2106.99	1700.39	1168.72	1339.48	1719.82		0.818992	1.11973	1.06128	1.09631	0.863564	1.25616	0.562412	0.835134	0.623669	0.554656	0.58921	0.909387	0.733897	0.504425	0.578126	0.742283			0.173272	0.756264	0.0963908		0.403761	0.173633	-0.219765	+
455	P08174	CD55	Complement decay-accelerating factor OS=Homo sapiens OX=9606 GN=CD55 PE=1 SV=4	1			117.285	134.633	162.105	136.093	118.121	159.321	65.6422	93.5855	53.2562	44.4464	67.5659	119.553	112.426	99.6559	87.7048	130.185		0.849844	0.975547	1.17461	0.986126	0.855902	1.15444	0.475642	0.678118	0.385893	0.322057	0.489581	0.866278	0.814636	0.722104	0.635507	0.943317			0.000481576	0.99932	0.000271836	+	0.767317	0.00332877	-0.530017
456	P13987	CD59	CD59 glycoprotein OS=Homo sapiens OX=9606 GN=CD59 PE=1 SV=1	1			98.3128	133.074	134.227	58.5895	43.3607	61.1133	58.5295	87.4616	40.8146	25.88	39.5592	123.696	97.1589	50.1225	28.3053	62.8615		0.806694	1.09192	1.10138	0.480749	0.355791	0.501458	0.480257	0.717656	0.334899	0.212355	0.324598	1.01497	0.797226	0.411274	0.232256	0.515802		+	2.25396	0	-1.16654	+	1.23719	0.000209106	-1.04393	+
457	P08962	CD63	CD63 antigen OS=Homo sapiens OX=9606 GN=CD63 PE=1 SV=2	1			42.6195	55.0607	52.3056	41.4244	37.223	40.1428	47.6797	43.6297	26.2345	24.1595	29.9839	95.18	82.6797	49.2611	67.2403	65.4048		0.852471	1.10132	1.04621	0.828566	0.74453	0.802932	0.953684	0.872677	0.52474	0.483236	0.599735	1.90378	1.65375	0.985315	1.34493	1.30822			1.26819	0.167512	-0.329229	+	2.05507	0.000539216	-0.773262	+
458	P60033	CD81	CD81 antigen OS=Homo sapiens OX=9606 GN=CD81 PE=1 SV=1	3			212.066	312.632	314.908	380.305	291.02	408.715	171.529	180.921	127.125	100.412	106.439	277.641	239.472	134.83	210.646	231.452		0.757734	1.11707	1.1252	1.35887	1.03984	1.46038	0.612891	0.64645	0.454231	0.358783	0.380318	0.99204	0.855658	0.481762	0.75266	0.827002			0.706378	0.152497	0.37182	+	1.80122	0.0011367	-0.669504	+
459	P21926	CD9	CD9 antigen OS=Homo sapiens OX=9606 GN=CD9 PE=1 SV=4	2			385.155	543.886	571.56	796.044	560.833	1010.14	411.872	455.293	340.573	275.905	332.069	748.305	537.143	320.484	424.682	588.341		0.770001	1.08734	1.14266	1.59145	1.12122	2.01947	0.823414	0.910221	0.680873	0.551589	0.663872	1.49601	1.07386	0.640711	0.849024	1.17621		+	0.980954	0.0052135	0.637752	+	1.37534	0.00340811	-0.459956	+
460	P48960	CD97	CD97 antigen OS=Homo sapiens OX=9606 GN=CD97 PE=1 SV=4	1			173.06	245.501	251.215	193.654	153.78	174.225	173.689	179.163	100.255	90.7513	119.032	226.112	214.481	110.055	115.1	123.447		0.775155	1.09963	1.12522	0.867397	0.688797	0.780373	0.777972	0.802491	0.449053	0.406485	0.533157	1.01278	0.960684	0.492948	0.515545	0.552933			0.807262	0.177655	-0.346874	+	1.87246	0.000527578	-0.780552	+
461	O75794	CDC123	Cell division cycle protein 123 homolog OS=Homo sapiens OX=9606 GN=CDC123 PE=1 SV=1	2			372.391	497.168	511.526	276.211	265.017	298.174	256.127	280.835	167.074	133.819	156.63	253.953	257.062	130.364	140.728	137.434		0.80891	1.07995	1.11114	0.599987	0.575671	0.647695	0.55636	0.610031	0.362919	0.290682	0.340232	0.551638	0.558391	0.283177	0.30569	0.298535		+	1.98775	0.00103333	-0.705783	+	2.07275	0.000177143	-0.820581	+
462	Q13042	CDC16	Cell division cycle protein 16 homolog OS=Homo sapiens OX=9606 GN=CDC16 PE=1 SV=2	5			740.812	957.166	1005.76	617.706	583.235	598.446	445.206	491.719	328.963	288.123	363.436	497.187	531.602	282.379	319.102	348.296		0.821986	1.06205	1.11597	0.685391	0.647143	0.664021	0.493989	0.545599	0.365009	0.319694	0.403259	0.551666	0.589852	0.313321	0.354068	0.386461		+	1.84427	0.00402564	-0.575291	+	1.50889	0.00178163	-0.52405	+
463	Q12834	CDC20	Cell division cycle protein 20 homolog OS=Homo sapiens OX=9606 GN=CDC20 PE=1 SV=2	7			1193.13	1448.52	1548.04	870.383	785.688	790.58	892.648	996.688	558.625	498.333	620.259	635.745	689.468	345.926	319.482	360.887		0.854333	1.0372	1.10846	0.623232	0.562587	0.56609	0.639175	0.713672	0.4	0.356828	0.444132	0.455221	0.493689	0.247698	0.228763	0.258411		+	2.48414	0.000555191	-0.769013	+	1.98492	0.000511628	-0.76033	+
464	Q9UJX2	CDC23	Cell division cycle protein 23 homolog OS=Homo sapiens OX=9606 GN=CDC23 PE=1 SV=3	2			230.202	284.266	271.296	168.065	176.777	174.387	126.195	131.199	72.6142	74.348	82.1875	134.395	145.737	68.3318	86.4602	75.2023		0.878897	1.08531	1.03579	0.641662	0.674924	0.665799	0.481805	0.50091	0.277237	0.283856	0.313787	0.513112	0.556415	0.260887	0.3301	0.287118		+	2.47498	0.00263628	-0.592256	+	2.70118	0.00038342	-0.754479	+
465	P30260	CDC27	Cell division cycle protein 27 homolog OS=Homo sapiens OX=9606 GN=CDC27 PE=1 SV=2	11			2310.87	2926.16	2969.29	1774.71	1649.96	1735.76	1832.73	1919.31	1155.81	1062.8	1235.82	1677.39	1715.18	880.184	873.924	965.398		0.844789	1.06972	1.08549	0.648784	0.603179	0.634545	0.669995	0.701646	0.422532	0.38853	0.451781	0.613207	0.627022	0.321771	0.319482	0.352922		+	2.25861	0.00153374	-0.66066	+	2.43831	0.000471597	-0.706543	+
466	Q16543	CDC37	Hsp90 co-chaperone Cdc37 OS=Homo sapiens OX=9606 GN=CDC37 PE=1 SV=1	14			5702.77	7134.38	7141.54	4554.76	4093.05	4250.12	3532.61	4224.52	2832.67	2682.2	3357.3	3055.29	3338.67	1928.75	2021.53	2287.55		0.856328	1.0713	1.07237	0.683943	0.614612	0.638198	0.530457	0.634354	0.425354	0.402759	0.504132	0.458782	0.501335	0.289621	0.303553	0.343498		+	2.22734	0.00196226	-0.624877	+	1.04742	0.00812051	-0.392134	+
467	O60508	CDC40	Pre-mRNA-processing factor 17 OS=Homo sapiens OX=9606 GN=CDC40 PE=1 SV=1	6			973.166	1355.8	1351.6	1027.8	987.241	967.495	586.087	758.941	569.209	521.372	617.244	577.242	598.994	407.359	394.996	397.967		0.79322	1.1051	1.10168	0.837752	0.804692	0.788597	0.477715	0.618607	0.463958	0.424966	0.503111	0.470505	0.488235	0.332035	0.321958	0.32438			0.827605	0.283665	-0.28707		0.590279	0.129453	-0.231847	+
468	P60953	CDC42	Cell division control protein 42 homolog OS=Homo sapiens OX=9606 GN=CDC42 PE=1 SV=2	4			289.767	364.007	445.676	292.889	257.189	289.359	233.495	233.136	201.445	199.865	248.69	234.281	269.617	199.404	226.014	287.26		0.790669	0.993243	1.21609	0.799188	0.701775	0.789556	0.637123	0.636144	0.54967	0.545359	0.678585	0.639268	0.735687	0.544101	0.61671	0.783828			0.912463	0.128451	-0.369604		0.34288	0.456432	-0.114362
469	Q5VT25	CDC42BPA	Serine/threonine-protein kinase MRCK alpha OS=Homo sapiens OX=9606 GN=CDC42BPA PE=1 SV=1	11			1581.19	1966.01	2056.16	1217.14	1057.98	1148.66	1881.73	2071.55	1376.4	1282.04	1620.57	1921.45	1998.42	1085.92	1180.73	1296.51		0.846558	1.05259	1.10085	0.651648	0.566435	0.614985	1.00747	1.10909	0.736915	0.686395	0.867642	1.02873	1.06994	0.581394	0.632155	0.694142		+	2.23789	0.000848665	-0.703825	+	1.37884	0.00321786	-0.476104	+
470	Q9Y5S2	CDC42BPB	Serine/threonine-protein kinase MRCK beta OS=Homo sapiens OX=9606 GN=CDC42BPB PE=1 SV=2	9			1041.39	1291.46	1421.38	861.416	745.717	737.628	758.278	882.002	520.419	487.918	604.101	834.342	832.158	437.763	464.675	492.342		0.832173	1.032	1.13582	0.688356	0.595901	0.589438	0.605939	0.704807	0.415866	0.389895	0.482736	0.666722	0.664976	0.349816	0.371321	0.39343		+	1.9461	0.00153555	-0.670786	+	1.62807	0.00111719	-0.611387	+
471	Q00587	CDC42EP1	Cdc42 effector protein 1 OS=Homo sapiens OX=9606 GN=CDC42EP1 PE=1 SV=1	1			222.307	263.235	284.844	156.563	137.449	134.108	118.074	120.803	70.0547	65.6658	75.8682	132.041	111.004	57.5461	59.2015	58.4649		0.865697	1.02508	1.10923	0.60968	0.535247	0.522237	0.459798	0.470425	0.272804	0.255713	0.295442	0.514188	0.432266	0.224093	0.23054	0.227671		+	2.58373	0.000508634	-0.843347	+	2.63071	0.000165113	-0.762395	+
472	O75419	CDC45	Cell division control protein 45 homolog OS=Homo sapiens OX=9606 GN=CDC45 PE=1 SV=1	3			1921.86	2426.88	1990.65	1379.29	1252.9	1302.81	988.479	1145.74	661.952	620.962	746.071	920.7	982.067	452.618	466.163	543.241		0.909485	1.14848	0.942039	0.652724	0.592912	0.616531	0.46778	0.5422	0.313257	0.293859	0.353064	0.435704	0.464745	0.214193	0.220603	0.257079		+	2.42945	0.000970711	-0.681341	+	1.84777	0.00110734	-0.658194	+
473	Q99459	CDC5L	Cell division cycle 5-like protein OS=Homo sapiens OX=9606 GN=CDC5L PE=1 SV=2	15			1890.53	2381.07	2466.03	1828.53	1607.47	1765.2	1534.64	1558.34	1106.22	971.454	1062.11	1363.92	1404.67	605.15	764.088	827.082		0.841778	1.0602	1.09803	0.814172	0.715743	0.785974	0.683314	0.693867	0.492556	0.43255	0.472916	0.6073	0.625444	0.269449	0.340218	0.368267			1.29453	0.105842	-0.365761	+	2.36757	0.00107519	-0.565359	+
474	Q99741	CDC6	Cell division control protein 6 homolog OS=Homo sapiens OX=9606 GN=CDC6 PE=1 SV=1	7			707.545	833.626	897.13	426.14	367.057	370.163	701.943	689.11	328.367	299.84	332.315	671.65	704.039	281.871	257.825	280.911		0.870539	1.02566	1.1038	0.524308	0.451614	0.455436	0.863646	0.847857	0.404011	0.368913	0.408869	0.826375	0.866225	0.346804	0.317219	0.345623		+	3.00788	0	-1.06402	+	3.4476	0	-1.12069	+
475	O00311	CDC7	Cell division cycle 7-related protein kinase OS=Homo sapiens OX=9606 GN=CDC7 PE=1 SV=1	2			416.706	516.777	534.628	286.413	240.842	285.699	248.08	264.963	134.657	139.461	150.786	215.764	213.189	95.9269	94.2702	98.8614		0.851515	1.056	1.09248	0.585268	0.492147	0.583809	0.506937	0.541437	0.275164	0.28498	0.308122	0.440901	0.435639	0.196021	0.192636	0.202018		+	2.43091	0.000495413	-0.848809	+	2.90207	0.000224231	-0.857747	+
476	Q6P1J9	CDC73	Parafibromin OS=Homo sapiens OX=9606 GN=CDC73 PE=1 SV=1	9			1089.34	1353.59	1426.03	855.826	744.774	775.016	837.679	854.094	501.074	463.68	545.233	750.086	769.627	360.718	395.731	389.977		0.844677	1.04958	1.10575	0.663609	0.577499	0.600949	0.649538	0.662266	0.388534	0.359538	0.422775	0.581618	0.59677	0.279702	0.306851	0.302389		+	2.19616	0.000892958	-0.696562	+	2.47628	0.00055	-0.752054	+
477	Q69YH5	CDCA2	Cell division cycle-associated protein 2 OS=Homo sapiens OX=9606 GN=CDCA2 PE=1 SV=2	6			1280.13	1643.48	1671.58	890.848	765.387	794.304	1378.7	1470.46	683.744	592.072	631.877	1040.01	1068	385.319	436.328	457.72		0.835741	1.07296	1.0913	0.581596	0.499688	0.518567	0.900093	0.959999	0.446387	0.386538	0.412525	0.678977	0.697251	0.251558	0.28486	0.298826		+	2.5114	0.000178295	-0.89966	+	3.07739	0	-1.16543	+
478	Q96GN5	CDCA7L	Cell division cycle-associated 7-like protein OS=Homo sapiens OX=9606 GN=CDCA7L PE=1 SV=2	1			300.619	429.931	472.984	187.818	179.94	157.605	163.301	271.122	122.345	132.364	225.539	152.567	178.503	83.5265	67.3606	79.1427		0.749341	1.07167	1.17899	0.468166	0.448529	0.392856	0.407054	0.675815	0.304964	0.329938	0.562192	0.380298	0.444947	0.208203	0.167907	0.197276		+	2.27553	0	-1.17356		0.408311	0.0138983	-0.45029	+
479	Q53HL2	CDCA8	Borealin OS=Homo sapiens OX=9606 GN=CDCA8 PE=1 SV=2	2			352.746	381.479	393.881	210.01	176.528	180.975	406.733	381.235	180.396	152.179	184.732	294.064	270.799	102.966	113.491	111.207		0.938066	1.01448	1.04746	0.558485	0.469445	0.481271	1.08164	1.01383	0.479732	0.404693	0.491262	0.782012	0.720142	0.27382	0.301809	0.295736		+	3.39164	0	-0.993949	+	2.68	0	-1.19659	+
480	Q9H5V8	CDCP1	CUB domain-containing protein 1 OS=Homo sapiens OX=9606 GN=CDCP1 PE=1 SV=3	10			1131.51	1522.88	1579.85	1330.24	1141.06	1445.23	1465.32	1767.78	1364.76	1191.56	1404.19	2203.65	2355.01	1853.05	1856.69	1971.92		0.801686	1.07898	1.11934	0.942488	0.808452	1.02396	1.03819	1.25249	0.966946	0.844232	0.994882	1.56131	1.66855	1.3129	1.31548	1.39712			0.222317	0.725253	-0.103826		0.895937	0.0462054	-0.289498
481	P22223	CDH3	Cadherin-3 OS=Homo sapiens OX=9606 GN=CDH3 PE=1 SV=2	3			323.958	384.512	441.896	279.748	263.177	280.46	212.917	243.921	157.932	145.513	171.396	243.738	250.522	153.512	135.666	161.515		0.844839	1.00276	1.15241	0.729545	0.68633	0.731402	0.555259	0.636113	0.411865	0.379478	0.446978	0.635636	0.653328	0.400339	0.353799	0.421209			1.62207	0.0166801	-0.471529	+	1.72038	0.00162633	-0.529091	+
482	P06493	CDK1	Cyclin-dependent kinase 1 OS=Homo sapiens OX=9606 GN=CDK1 PE=1 SV=3	8			1482.85	1787.8	1858.29	1172.72	1094.1	1054.74	987.065	1153.8	755.146	720.448	826.197	922.652	981.45	635.397	575.724	590.3		0.867343	1.04571	1.08694	0.685943	0.639957	0.616934	0.57735	0.674876	0.441697	0.421402	0.483256	0.539674	0.574066	0.371654	0.33675	0.345276		+	2.31407	0.00196535	-0.621348	+	1.62333	0.0029554	-0.478355	+
483	P21127	CDK11B	Cyclin-dependent kinase 11B OS=Homo sapiens OX=9606 GN=CDK11B PE=1 SV=4	3			531.134	710.615	702.489	496.356	441.401	448.353	366.64	472.222	282.889	285.526	337.952	433.543	430.334	604.113	293.428	331.234		0.819551	1.09649	1.08396	0.765888	0.681091	0.691818	0.565733	0.728648	0.436504	0.440573	0.521467	0.668966	0.664014	0.932159	0.452766	0.511101			1.50078	0.0166858	-0.477506	+	1.12829	0.0035969	-0.466689
484	Q9NYV4	CDK12	Cyclin-dependent kinase 12 OS=Homo sapiens OX=9606 GN=CDK12 PE=1 SV=2	7			1118.19	1355.17	1491.4	847.019	738.369	742.457	773.284	871.703	579.211	536.793	684.176	673.479	676.519	376.81	351.23	416.819		0.846097	1.02541	1.12849	0.640911	0.558699	0.561792	0.585118	0.659588	0.438269	0.406173	0.517693	0.509599	0.511899	0.285119	0.265764	0.315393		+	2.27469	0.000699605	-0.761016	+	1.27447	0.00348806	-0.45981	+
485	Q14004	CDK13	Cyclin-dependent kinase 13 OS=Homo sapiens OX=9606 GN=CDK13 PE=1 SV=2	13			2433.46	2991.82	3135.42	1821.04	1611.2	1674.85	2134.42	2207.77	1299.5	1200.54	1312.22	2335.81	2263.23	1086.33	1102.72	1141.83		0.852778	1.04845	1.09877	0.638163	0.564627	0.586932	0.747983	0.773688	0.455395	0.420716	0.459853	0.818558	0.793123	0.380692	0.386436	0.400141		+	2.40152	0.000659832	-0.738587	+	3.09689	0.000182622	-0.773667	+
486	P24941	CDK2	Cyclin-dependent kinase 2 OS=Homo sapiens OX=9606 GN=CDK2 PE=1 SV=2	9			875.099	1028.95	1051.86	597.701	582.519	543.299	568.877	625.337	388.246	356.066	412.102	537.008	574.821	316.613	294.888	318.225		0.888152	1.0443	1.06755	0.606616	0.591208	0.551403	0.577362	0.634665	0.394037	0.361377	0.418249	0.545018	0.583395	0.321336	0.299287	0.322972		+	2.94061	0.000405	-0.774648	+	2.1737	0.00107946	-0.632336	+
487	P11802	CDK4	Cyclin-dependent kinase 4 OS=Homo sapiens OX=9606 GN=CDK4 PE=1 SV=2	3			733.048	874.841	950.86	499.259	461.768	466.31	405.324	432.67	293.321	245.133	302.863	452.502	477.085	265.872	252.197	274.538		0.859461	1.02571	1.11483	0.585355	0.541399	0.546724	0.475221	0.507283	0.343904	0.287406	0.355091	0.530535	0.559357	0.311721	0.295688	0.321882		+	2.70134	0.000504673	-0.834638	+	1.71037	0.00103748	-0.584601	+
488	Q00535	CDK5	Cyclin-dependent-like kinase 5 OS=Homo sapiens OX=9606 GN=CDK5 PE=1 SV=3	4			321.989	359.928	403.758	236.877	216.86	245.303	265.765	299.311	190.057	177.744	229.183	253.982	306.708	165.811	163.944	200.86		0.889739	0.994574	1.11569	0.654552	0.59924	0.677835	0.734377	0.827073	0.525177	0.491153	0.633292	0.701818	0.847513	0.458179	0.45302	0.555028		+	2.36722	0.00177876	-0.630915	+	1.33722	0.00228724	-0.511654	+
489	Q96SZ6	CDK5RAP1	CDK5 regulatory subunit-associated protein 1 OS=Homo sapiens OX=9606 GN=CDK5RAP1 PE=1 SV=2	1			27.2666	33.8899	39.4596	16.7205	21.8114	17.7732	14.9955	21.5798	9.09893	7.43704	13.0667	17.2562	16.1291	10.3981	9.62212	8.67116		0.812989	1.01047	1.17654	0.498543	0.650335	0.529931	0.44711	0.64343	0.271296	0.221745	0.389601	0.514516	0.48091	0.310033	0.286896	0.258542		+	1.89662	0.000377183	-0.830654	+	1.05268	0.000498301	-0.906284	+
490	Q96SN8	CDK5RAP2	CDK5 regulatory subunit-associated protein 2 OS=Homo sapiens OX=9606 GN=CDK5RAP2 PE=1 SV=5	3			509.811	685.71	805.167	468.059	407.141	402.406	293.765	368.557	242.937	209.336	251.117	391.65	401.069	266.448	249.043	260.542		0.764454	1.02821	1.20734	0.701847	0.610501	0.603401	0.440496	0.552645	0.36428	0.313896	0.376546	0.587273	0.601397	0.399535	0.373436	0.390679		+	1.4174	0.00365132	-0.625326	+	1.26492	0.00313454	-0.493354	+
491	P50750	CDK9	Cyclin-dependent kinase 9 OS=Homo sapiens OX=9606 GN=CDK9 PE=1 SV=3	2			247.911	275.563	309.472	199.727	170.083	152.653	184.409	187.795	140.54	127.93	154.142	167.956	168.068	91.8233	91.5733	91.3694		0.892895	0.992488	1.11462	0.719352	0.612584	0.549806	0.664181	0.676376	0.506179	0.460762	0.555169	0.604923	0.605326	0.330718	0.329817	0.329083		+	2.0112	0.00153846	-0.67583	+	1.56133	0.00550708	-0.405835	+
492	Q5VV42	CDKAL1	Threonylcarbamoyladenosine tRNA methylthiotransferase OS=Homo sapiens OX=9606 GN=CDKAL1 PE=1 SV=1	3			499.168	600.011	666.458	404.861	381.015	402.004	315.541	379.948	235.207	223.801	268.742	298.707	315.606	160.249	159.494	185.161		0.848138	1.01948	1.13238	0.687901	0.647384	0.683046	0.536137	0.645571	0.399641	0.380261	0.45662	0.507534	0.536247	0.27228	0.270997	0.314608		+	1.9653	0.00460596	-0.562181	+	1.4441	0.00204184	-0.517692	+
493	A8MXV6	CDRT15L2	CMT1A duplicated region transcript 15 protein-like protein OS=Homo sapiens OX=9606 GN=CDRT15L2 PE=2 SV=1	1			427.89	457.424	390.071	172.943	176.375	150.993	370.569	364.109	145.338	123.42	153.413	368.353	361.617	123.779	117.938	107.146		1.0065	1.07597	0.917537	0.406802	0.414875	0.35517	0.871664	0.856468	0.341869	0.290312	0.360863	0.866451	0.850607	0.291157	0.277417	0.252032		+	3.81168	0	-1.35036	+	2.83697	0	-1.39025	+
494	O95674	CDS2	Phosphatidate cytidylyltransferase 2 OS=Homo sapiens OX=9606 GN=CDS2 PE=1 SV=1	4			401.506	516.156	596.12	408.116	385.423	444.034	387.01	448.63	344.241	335.791	388.057	478.382	492.322	302.078	371.088	431.35		0.795701	1.02291	1.18139	0.808801	0.763828	0.879983	0.766973	0.889091	0.682214	0.665468	0.769048	0.948053	0.975679	0.598656	0.735419	0.854846			0.707972	0.318837	-0.274246		0.855346	0.113981	-0.229865	+
495	Q9H211	CDT1	DNA replication factor Cdt1 OS=Homo sapiens OX=9606 GN=CDT1 PE=1 SV=3	1			84.2838	74.5406	89.7848	43.0273	34.3958	32.3337	72.3638	66.7978	29.2039	23.0404	26.8468	48.2219	48.4122	18.7281	19.5882	13.5317		1.01706	0.899491	1.08345	0.519216	0.415059	0.390175	0.873224	0.806058	0.352407	0.278032	0.323964	0.5819	0.584196	0.225994	0.236373	0.163289		+	2.88205	0	-1.18641	+	2.71225	0	-1.40584	+
496	Q9Y232	CDYL	Chromodomain Y-like protein OS=Homo sapiens OX=9606 GN=CDYL PE=1 SV=2	3			334.061	415.171	464.058	297.889	258.364	265.702	305.586	314.766	204.085	194.953	225.649	276.158	264.379	148.123	158.552	169.524		0.826005	1.02656	1.14744	0.736565	0.638835	0.656979	0.755597	0.778295	0.504624	0.482044	0.557943	0.682833	0.653708	0.366251	0.392038	0.419168		+	1.64655	0.00589332	-0.551378	+	2.23052	0.00110638	-0.57747	+
497	Q03701	CEBPZ	CCAAT/enhancer-binding protein zeta OS=Homo sapiens OX=9606 GN=CEBPZ PE=1 SV=3	11			1682.26	2091.79	2014.19	918.314	811.421	814.802	1273.2	1338.12	610.535	533.813	613.542	1896.14	1637.74	599.417	540.575	569.655		0.871902	1.08416	1.04394	0.475955	0.420553	0.422306	0.65989	0.693537	0.316436	0.276671	0.317994	0.982755	0.848828	0.310673	0.280176	0.295248		+	3.32156	0	-1.18175	+	3.0084	0	-1.1584	+
498	Q92879	CELF1	CUGBP Elav-like family member 1 OS=Homo sapiens OX=9606 GN=CELF1 PE=1 SV=2	2			132.695	159.249	188.285	117.451	89.8939	119.346	90.8007	95.9978	67.1464	62.0905	75.1239	84.2221	96.4309	65.4166	51.509	66.1601		0.828948	0.994832	1.17622	0.733719	0.561569	0.745557	0.567234	0.5997	0.419465	0.387881	0.4693	0.526137	0.602406	0.408659	0.321778	0.413303		+	1.31411	0.00785999	-0.552937	+	1.63067	0.00337495	-0.459201	+
499	Q9BU64	CENPO	Centromere protein O OS=Homo sapiens OX=9606 GN=CENPO PE=1 SV=1	1			49.6934	58.6229	59.847	29.3208	27.3776	27.121	40.4946	41.7926	26.406	21.5964	20.1447	50.0357	45.4007	13.671	16.8662	14.7551		0.88652	1.04582	1.06766	0.523077	0.488411	0.483833	0.722416	0.745572	0.471078	0.385276	0.359377	0.892627	0.80994	0.243888	0.30089	0.263228		+	3.39191	0	-1.00049	+	1.96974	0.000194662	-0.86647	+
500	Q7L2Z9	CENPQ	Centromere protein Q OS=Homo sapiens OX=9606 GN=CENPQ PE=1 SV=1	7			529.472	598.465	600.431	310.775	269.083	279.335	594.874	566.669	277.446	229.515	231.769	618.421	549.935	186.058	174.962	192.859		0.919027	1.03878	1.04219	0.539425	0.467059	0.484853	1.03255	0.983591	0.481575	0.398379	0.402291	1.07342	0.954545	0.322949	0.303689	0.334753		+	3.51434	0	-1.00863	+	2.7408	0	-1.24305	+
501	Q71F23	CENPU	Centromere protein U OS=Homo sapiens OX=9606 GN=CENPU PE=1 SV=1	8			1258.16	1462.03	1430.96	800.812	690.948	698.537	1449.19	1254.85	667.28	547.946	539.445	1358.67	1153.93	390.466	448.81	396.965		0.909261	1.0566	1.03414	0.57874	0.499342	0.504827	1.04732	0.906869	0.482237	0.395996	0.389852	0.981899	0.833935	0.282186	0.324351	0.286883		+	3.17885	0.00023	-0.92256	+	2.4096	0	-1.21204	+
502	Q9UPN4	CEP131	Centrosomal protein of 131 kDa OS=Homo sapiens OX=9606 GN=CEP131 PE=1 SV=3	5			562.822	760.936	809.91	647.001	572.131	583.639	518.208	528.857	420.607	369.963	388.859	696.999	631.243	517.552	487.173	489.528		0.791344	1.0699	1.13876	0.909702	0.804433	0.820614	0.728616	0.743589	0.591386	0.520179	0.546747	0.980001	0.887546	0.727693	0.68498	0.688291			0.594638	0.399419	-0.227675	+	2.01161	0.00408469	-0.415171	+
503	Q8TAP6	CEP76	Centrosomal protein of 76 kDa OS=Homo sapiens OX=9606 GN=CEP76 PE=1 SV=1	1			73.0904	91.9706	83.6933	47.6451	49.1311	48.8624	64.7215	67.6164	48.0399	43.2426	45.8634	53.1189	57.4505	25.2876	31.8171	32.4452		0.881477	1.10917	1.00935	0.574604	0.592526	0.589285	0.780547	0.81546	0.579366	0.52151	0.553117	0.640619	0.692858	0.304971	0.383717	0.391292		+	2.85411	0.000383886	-0.766093	+	2.49635	0.00116048	-0.534466	+
504	Q5JTW2	CEP78	Centrosomal protein of 78 kDa OS=Homo sapiens OX=9606 GN=CEP78 PE=1 SV=1	6			1086.7	1426.26	1565.38	984.048	923.079	935.784	716.775	783.913	506.477	470.191	508.211	816.064	799.914	445.644	448.823	511.775		0.799369	1.04915	1.15148	0.723859	0.679011	0.688357	0.527255	0.576641	0.372561	0.345869	0.373837	0.600291	0.588411	0.327813	0.330151	0.376458			1.45936	0.011904	-0.504377	+	2.52278	0.00113196	-0.599716	+
505	Q6P2H3	CEP85	Centrosomal protein of 85 kDa OS=Homo sapiens OX=9606 GN=CEP85 PE=1 SV=1	1			61.2563	76.0161	88.7838	50.9368	39.367	38.2405	46.3438	43.4265	24.7867	23.8242	33.7554	42.3447	45.3453	24.1426	27.4348	29.7074		0.812935	1.00881	1.17825	0.675984	0.522441	0.507491	0.61503	0.576315	0.328945	0.316172	0.447969	0.561958	0.601779	0.320397	0.364088	0.394248		+	1.78618	0.000625381	-0.810221	+	1.40076	0.000552083	-0.726439	+
506	Q96GE4	CEP95	Centrosomal protein of 95 kDa OS=Homo sapiens OX=9606 GN=CEP95 PE=1 SV=1	2			203.947	243.488	272.724	164.557	151.072	155.898	130.7	132.128	77.9593	79.8019	98.2219	122.444	129.693	77.342	74.5704	74.1752		0.849592	1.01431	1.1361	0.685503	0.629328	0.649432	0.544463	0.550412	0.324759	0.332435	0.409168	0.510071	0.540268	0.322187	0.310641	0.308995		+	2.04082	0.00306351	-0.601687	+	1.71652	0.0010904	-0.630963	+
507	Q8IW35	CEP97	Centrosomal protein of 97 kDa OS=Homo sapiens OX=9606 GN=CEP97 PE=1 SV=1	1			213.005	255.651	275.954	161.678	140.684	147.216	196.495	216.002	151.042	141.43	162.634	208.267	237.085	130.047	129.348	134.279		0.858188	1.03001	1.11181	0.651393	0.566809	0.593127	0.791669	0.870262	0.608541	0.569815	0.655245	0.839098	0.955205	0.523953	0.521137	0.541004		+	2.34326	0.000594958	-0.721992	+	1.7864	0.00342994	-0.44388	+
508	Q9Y6K0	CEPT1	Choline/ethanolaminephosphotransferase 1 OS=Homo sapiens OX=9606 GN=CEPT1 PE=1 SV=1	5			856.154	1106.65	1157.33	748.09	770.382	776.545	625.599	649.507	484.039	456.841	567.431	561.22	589.125	340.286	362.195	393.615		0.82319	1.06404	1.11277	0.719286	0.74072	0.746646	0.601512	0.624499	0.465402	0.439251	0.545583	0.539611	0.566442	0.327184	0.348249	0.37846			1.46538	0.0350978	-0.430957		1.18563	0.0138894	-0.348538	+
509	Q96G23	CERS2	Ceramide synthase 2 OS=Homo sapiens OX=9606 GN=CERS2 PE=1 SV=1	3			316.553	408.531	429.974	293.801	234.827	302.812	262.163	269.359	180.701	147.997	189.915	271.174	280.608	158.718	177.933	200.488		0.822174	1.06107	1.11676	0.763081	0.60991	0.786485	0.680909	0.699599	0.46933	0.384388	0.493261	0.704313	0.728815	0.412234	0.46214	0.520722			1.23488	0.0224476	-0.470761	+	1.6636	0.00107371	-0.628488	+
510	Q8N5B7	CERS5	Ceramide synthase 5 OS=Homo sapiens OX=9606 GN=CERS5 PE=2 SV=1	1			98.6468	110.908	119.578	84.1393	77.0726	85.9426	87.8323	93.1818	70.8432	65.1931	85.7044	92.7932	99.0473	56.7214	76.8024	72.9968		0.899152	1.01091	1.08994	0.766918	0.702506	0.783355	0.800579	0.849339	0.645726	0.594226	0.781184	0.845797	0.902802	0.517008	0.700043	0.665356			1.92031	0.0380006	-0.410358		0.836575	0.0387681	-0.301161	+
511	P41208	CETN2	Centrin-2 OS=Homo sapiens OX=9606 GN=CETN2 PE=1 SV=1	6			827.831	986.104	1072.74	632.753	540.989	530.064	654.348	737.969	418.626	389.389	419.704	625.69	755.05	363.396	354.188	368.164		0.86033	1.02482	1.11485	0.657594	0.562227	0.550873	0.680036	0.76694	0.43506	0.404676	0.436181	0.650253	0.784692	0.377662	0.368093	0.382617		+	2.2861	0.000692082	-0.756965	+	2.62709	0.000165997	-0.764727	+
512	O15182	CETN3	Centrin-3 OS=Homo sapiens OX=9606 GN=CETN3 PE=1 SV=2	1			323.926	369.864	401.524	262.109	233.294	237.44	247.884	252.507	179.666	156.325	174.908	258.484	272.651	158.216	164.378	165.525		0.887214	1.01304	1.09975	0.717901	0.638978	0.650334	0.67894	0.691602	0.492095	0.428165	0.479063	0.707972	0.746775	0.433344	0.450222	0.453363		+	2.27993	0.00355978	-0.576089	+	2.21719	0.00102632	-0.557507	+
513	Q494V2	CFAP100	Cilia- and flagella-associated protein 100 OS=Homo sapiens OX=9606 GN=CFAP100 PE=2 SV=1	3			1159.79	1172.17	1151.47	794.182	741.834	643.091	1548.88	975.998	800.916	855.914	726.342	1082.45	1062.02	582.622	686.069	480.522		0.998834	1.0095	0.991669	0.683966	0.638882	0.553843	1.33393	0.840549	0.689765	0.73713	0.62554	0.932228	0.914633	0.501766	0.590856	0.413835		+	2.78921	0.000691546	-0.682239	+	1.01909	0.001316	-0.633427	+
514	Q9Y6A4	CFAP20	Cilia- and flagella-associated protein 20 OS=Homo sapiens OX=9606 GN=CFAP20 PE=1 SV=1	1			50.7518	62.1186	68.5069	37.5506	31.4568	33.1154	39.195	39.7121	22.3826	22.6949	31.0278	27.2853	39.755	30.5639	28.21	27.6226		0.83944	1.02745	1.13311	0.621091	0.520299	0.547732	0.64829	0.656842	0.370211	0.375376	0.513203	0.451302	0.657552	0.50553	0.466596	0.456881		+	2.28491	0.000421875	-0.821674	+	1.33684	0.00105753	-0.654022
515	P23528	CFL1	Cofilin-1 OS=Homo sapiens OX=9606 GN=CFL1 PE=1 SV=3	7			1707.7	2044.2	2008.91	1054.2	1068.68	997.826	998.895	1243.62	640.48	537.259	674.405	1151.9	1194.8	540.67	537.295	540.409		0.889302	1.06454	1.04616	0.548985	0.556526	0.519628	0.520185	0.647628	0.333536	0.279783	0.351203	0.599864	0.622204	0.281559	0.279802	0.281423		+	3.25123	0.000196162	-0.880388	+	1.79686	0.000182085	-0.858941	+
516	Q9Y281	CFL2	Cofilin-2 OS=Homo sapiens OX=9606 GN=CFL2 PE=1 SV=1	10			2028.75	2482.46	2459.09	1309.04	1282.22	1190.19	1169.25	1408.03	754.872	653.659	859.632	1388.47	1438.3	691.215	679.609	686.266		0.873169	1.06844	1.05839	0.563408	0.551864	0.512255	0.503242	0.606013	0.324895	0.281333	0.369984	0.597594	0.619041	0.297497	0.292502	0.295367		+	2.97207	0.000183267	-0.87738	+	1.64552	0.000478261	-0.772062	+
517	Q13111	CHAF1A	Chromatin assembly factor 1 subunit A OS=Homo sapiens OX=9606 GN=CHAF1A PE=1 SV=3	1			149.176	180.237	188.189	106.807	79.682	89.9252	163.918	159.398	91.0169	82.0623	89.2659	115.785	111.563	52.3706	49.1959	54.0602		0.864618	1.04465	1.09074	0.619049	0.461834	0.521203	0.950062	0.923864	0.52753	0.47563	0.517382	0.671085	0.646615	0.303538	0.285137	0.313331		+	2.32222	0.000174573	-0.908321	+	3.15114	0.000250505	-0.887744	+
518	Q96JM3	CHAMP1	Chromosome alignment-maintaining phosphoprotein 1 OS=Homo sapiens OX=9606 GN=CHAMP1 PE=1 SV=2	2			290.006	344.514	395.642	210.116	203.9	189.023	203.76	234.143	148.645	131.957	187.763	178.774	213.444	113.481	105.61	108.366		0.844545	1.00328	1.15217	0.611892	0.59379	0.550466	0.593382	0.681863	0.432879	0.38428	0.546797	0.520619	0.621584	0.330475	0.307554	0.315579		+	2.28798	0.000709419	-0.76241	+	1.02509	0.00337357	-0.50018	+
519	Q9NX63	CHCHD3	MICOS complex subunit MIC19 OS=Homo sapiens OX=9606 GN=CHCHD3 PE=1 SV=1	6			394.289	615.496	534.967	508.144	473.207	370.257	268.336	424.886	332.478	311.147	404.135	231.872	261.158	119.378	189.16	202.601		0.765733	1.19533	1.03894	0.986846	0.918996	0.719061	0.521124	0.825154	0.645692	0.604266	0.784854	0.450309	0.507184	0.231839	0.36736	0.393463			0.316246	0.514949	-0.181406		0.0463143	0.830432	0.0396726	+
520	Q8N4Q1	CHCHD4	Mitochondrial intermembrane space import and assembly protein 40 OS=Homo sapiens OX=9606 GN=CHCHD4 PE=1 SV=1	5			793.455	915.074	1098.48	673.849	586.797	599.899	334.619	393.677	272.598	256.132	327.529	362.487	404.785	227.089	255.898	245.75		0.848008	0.977988	1.174	0.720178	0.627141	0.641144	0.357625	0.420744	0.29134	0.273742	0.350048	0.387409	0.432615	0.242702	0.273492	0.262646		+	1.75855	0.00400516	-0.583156		0.929472	0.0154963	-0.354671	+
521	O14646	CHD1	Chromodomain-helicase-DNA-binding protein 1 OS=Homo sapiens OX=9606 GN=CHD1 PE=1 SV=2	3			443.442	581.075	677.193	411.92	348.874	379.022	332.639	370.853	244.79	196.55	234.784	327.115	313.229	217.942	186.986	184.492		0.781758	1.0244	1.19385	0.726187	0.615041	0.66819	0.58642	0.653789	0.431548	0.346504	0.413908	0.576682	0.552202	0.384217	0.329644	0.325247		+	1.36569	0.00668719	-0.559895	+	1.73301	0.00115916	-0.646477	+
522	Q86WJ1	CHD1L	Chromodomain-helicase-DNA-binding protein 1-like OS=Homo sapiens OX=9606 GN=CHD1L PE=1 SV=3	1			350.693	424.606	452.05	262.515	236.407	261.405	221.911	212.05	139.803	120.493	146.39	251.257	251.188	150.489	134.849	135.428		0.857196	1.03786	1.10494	0.641663	0.577848	0.63895	0.542415	0.518312	0.341719	0.29452	0.35782	0.614146	0.613977	0.367839	0.32961	0.331026		+	2.32071	0.00102762	-0.684285	+	2.05173	0.000579235	-0.683139	+
523	O14647	CHD2	Chromodomain-helicase-DNA-binding protein 2 OS=Homo sapiens OX=9606 GN=CHD2 PE=1 SV=2	4			274.992	369.588	377.097	252.633	213.627	233.301	244.249	268.899	169.851	143.784	171.677	251.315	242.02	147.222	151.011	151.254		0.807472	1.08524	1.10729	0.741819	0.627283	0.685053	0.7172	0.789581	0.498742	0.4222	0.504104	0.737948	0.710655	0.432295	0.443421	0.444134		+	1.51745	0.00812308	-0.535305	+	1.95501	0.000711111	-0.668419	+
524	Q12873	CHD3	Chromodomain-helicase-DNA-binding protein 3 OS=Homo sapiens OX=9606 GN=CHD3 PE=1 SV=3	10			1659.94	1974.38	2023.1	1077.78	1013.6	1059.58	1603.69	1562.75	869.381	782.436	926.477	1189.97	1227.32	668.4	606.581	645.858		0.880228	1.04697	1.0728	0.571522	0.537489	0.561871	0.8504	0.82869	0.461013	0.414908	0.491289	0.631014	0.65082	0.354437	0.321656	0.342484		+	3.06667	0.00034965	-0.839352	+	2.61103	0.000231776	-0.884764	+
525	Q14839	CHD4	Chromodomain-helicase-DNA-binding protein 4 OS=Homo sapiens OX=9606 GN=CHD4 PE=1 SV=2	15			1575.03	1906.62	2005.72	1082.24	1016.5	1003.37	1485.81	1533.48	896.239	800.682	934.984	1156.71	1207.48	637.867	596.724	656.09		0.861085	1.04237	1.09655	0.591671	0.555731	0.548552	0.812307	0.838369	0.489983	0.437741	0.511165	0.632385	0.660141	0.348728	0.326235	0.358691		+	2.7332	0.000466859	-0.816011	+	2.53071	0.000175141	-0.785939	+
526	Q8TD26	CHD6	Chromodomain-helicase-DNA-binding protein 6 OS=Homo sapiens OX=9606 GN=CHD6 PE=1 SV=4	7			377.582	458.836	478.904	281.393	252.554	253.611	429.104	406.122	208.105	187.27	200.672	463.416	461.715	182.63	198.447	197.502		0.861193	1.04652	1.09229	0.641804	0.576028	0.578439	0.978705	0.926287	0.474648	0.427127	0.457695	1.05696	1.05308	0.416544	0.45262	0.450465		+	2.47952	0.000659218	-0.734237	+	3.31914	0	-1.07253	+
527	Q9P2D1	CHD7	Chromodomain-helicase-DNA-binding protein 7 OS=Homo sapiens OX=9606 GN=CHD7 PE=1 SV=3	4			1412.08	1744.44	1726.02	992.287	887.635	985.951	969.496	951.731	531.608	467.614	539.766	1072.24	1002.19	450.276	462.097	461.155		0.86763	1.07184	1.06053	0.609695	0.545393	0.605802	0.595692	0.584776	0.326638	0.287318	0.331651	0.658821	0.61578	0.276665	0.283928	0.283349		+	2.61605	0.000459161	-0.76386	+	2.75088	0.00025	-0.907889	+
528	Q9HCK8	CHD8	Chromodomain-helicase-DNA-binding protein 8 OS=Homo sapiens OX=9606 GN=CHD8 PE=1 SV=5	14			2864.17	3562.36	3712.74	2130.72	1913.41	1965.79	1681.99	1878.41	1183.77	1062.42	1278	1658.07	1630.22	911.15	898.671	958.423		0.847449	1.05403	1.09852	0.630436	0.566138	0.581637	0.497666	0.555783	0.350253	0.314348	0.378134	0.490589	0.482348	0.26959	0.265898	0.283578		+	2.40264	0.000681424	-0.746946	+	1.85494	0.00114248	-0.60163	+
529	Q3L8U1	CHD9	Chromodomain-helicase-DNA-binding protein 9 OS=Homo sapiens OX=9606 GN=CHD9 PE=1 SV=2	2			231.061	303.955	336.93	200.017	200.678	198.42	157.524	159.363	106.68	101.926	119.662	175.672	170.116	98.5307	96.5546	102.453		0.794984	1.04578	1.15923	0.688174	0.690449	0.68268	0.541974	0.548301	0.367041	0.350685	0.411707	0.604414	0.585298	0.339003	0.332204	0.352498		+	1.49241	0.0095	-0.523673	+	2.03892	0.00137665	-0.537352	+
530	O96017	CHEK2	Serine/threonine-protein kinase Chk2 OS=Homo sapiens OX=9606 GN=CHEK2 PE=1 SV=1	1			36.7026	58.674	54.6101	30.5161	26.2302	30.3313	19.8517	21.0923	12.3866	17.335	14.2907	23.1848	22.6078	13.2687	10.0471	13.8684		0.734117	1.17358	1.0923	0.610376	0.524651	0.60668	0.397069	0.421883	0.247754	0.346731	0.285839	0.463737	0.452196	0.265398	0.20096	0.277393		+	1.56968	0.000842415	-0.758722	+	1.12449	0.00327407	-0.493808	+
531	Q8IWX8	CHERP	Calcium homeostasis endoplasmic reticulum protein OS=Homo sapiens OX=9606 GN=CHERP PE=1 SV=3	8			1556.73	1911.95	2059.59	1392.69	1216.52	1282.1	1031.93	1229.06	878.726	796.693	927.485	1040.1	1092.1	920.316	647.569	746.946		0.844783	1.03755	1.11767	0.755764	0.660163	0.695751	0.559993	0.666968	0.476854	0.432338	0.503314	0.564426	0.592645	0.499424	0.351413	0.405342			1.69579	0.0109778	-0.498926	+	1.24792	0.00835652	-0.379125	+
532	Q9BWS9	CHID1	Chitinase domain-containing protein 1 OS=Homo sapiens OX=9606 GN=CHID1 PE=1 SV=1	1			269.287	340.265	362.438	191.898	178.823	180.643	173.855	198.224	120.896	110.07	132.046	184.711	188.31	106.298	110.316	109.627		0.831141	1.05021	1.11865	0.592284	0.551929	0.557546	0.536595	0.611809	0.37314	0.339726	0.407554	0.570102	0.58121	0.328084	0.340485	0.338358		+	2.41501	0.00041169	-0.807175	+	1.84814	0.00108809	-0.621432	+
533	Q9NZZ3	CHMP5	Charged multivesicular body protein 5 OS=Homo sapiens OX=9606 GN=CHMP5 PE=1 SV=1	1			111.355	153.218	160.134	125.838	111.092	113.028	80.4198	88.4659	67.7747	68.04	79.6058	129.932	139.255	118.991	123.13	121.279		0.786578	1.08228	1.13114	0.888881	0.78472	0.798395	0.568061	0.624896	0.47874	0.480614	0.562311	0.9178	0.983655	0.840516	0.869753	0.856678			0.686919	0.338983	-0.263343		0.90795	0.102915	-0.236335
534	Q9UHD1	CHORDC1	Cysteine and histidine-rich domain-containing protein 1 OS=Homo sapiens OX=9606 GN=CHORDC1 PE=1 SV=2	2			609.72	835.079	896.786	628.05	602.416	563.338	282.205	325.54	255.87	236.447	281.407	437.177	428.217	324.042	323.956	323.857		0.781163	1.06989	1.14895	0.804647	0.771805	0.721739	0.361556	0.417076	0.327816	0.302932	0.360534	0.560104	0.548625	0.415157	0.415047	0.41492			0.969723	0.127578	-0.366394		0.835865	0.105874	-0.236594	+
535	Q99653	CHP1	Calcineurin B homologous protein 1 OS=Homo sapiens OX=9606 GN=CHP1 PE=1 SV=3	7			1668.68	2014.58	1777.63	491.11	473.087	460.629	1336.69	1686.88	529.946	369.077	542.75	1650.33	1606.48	369.417	342.735	334.849		0.916708	1.10673	0.976561	0.269797	0.259896	0.253052	0.734325	0.926706	0.291132	0.202757	0.298166	0.906627	0.882537	0.202943	0.188285	0.183953		+	4.67158	0	-1.93439	+	2.09445	0	-1.66509	+
536	Q8IZ52	CHPF	Chondroitin sulfate synthase 2 OS=Homo sapiens OX=9606 GN=CHPF PE=1 SV=2	5			643.133	784.013	855.353	515.663	440.228	435.725	722.87	816.089	505.106	490.574	565.141	695.196	733.327	342.88	372.192	399.383		0.845301	1.03047	1.12423	0.677761	0.578613	0.572695	0.950103	1.07263	0.663886	0.644785	0.742792	0.91373	0.963848	0.450664	0.48919	0.524929		+	2.09028	0.000917511	-0.708139	+	1.91761	0.001196	-0.564675	+
537	Q7LGC8	CHST3	Carbohydrate sulfotransferase 3 OS=Homo sapiens OX=9606 GN=CHST3 PE=1 SV=3	1			226.697	291.713	284.2	200.103	157.53	180.962	198.993	207.856	157.367	145.877	149.748	257.489	248.637	123.76	133.971	136.872		0.847349	1.09037	1.06228	0.747946	0.588816	0.676401	0.743797	0.776925	0.588207	0.54526	0.559729	0.962444	0.929357	0.462591	0.500758	0.511601		+	1.70102	0.00479468	-0.573389	+	2.54458	0.00334628	-0.430344	+
538	Q86X52	CHSY1	Chondroitin sulfate synthase 1 OS=Homo sapiens OX=9606 GN=CHSY1 PE=1 SV=3	1			165.58	206.471	230.927	154.239	122.655	139.951	127.316	144.404	103.543	84.2847	116.986	122.86	134.22	77.7533	72.0119	84.111		0.823811	1.02726	1.14893	0.767386	0.610246	0.696299	0.633436	0.718454	0.515158	0.419342	0.582041	0.611266	0.667786	0.386846	0.358281	0.418478		+	1.43366	0.00976099	-0.525403	+	0.959725	0.00629851	-0.429293	+
539	Q8WVB6	CHTF18	Chromosome transmission fidelity protein 18 homolog OS=Homo sapiens OX=9606 GN=CHTF18 PE=1 SV=1	9			1596.54	2094.71	2356.31	1560.18	1350.41	1369.38	1219.97	1448.91	1076.05	944.812	1209.02	1264.12	1313.58	769.303	788.99	940.479		0.791992	1.03912	1.16889	0.773955	0.669895	0.679305	0.605188	0.718758	0.533794	0.468691	0.599756	0.627089	0.651625	0.381626	0.391393	0.466541			1.2664	0.0186864	-0.483199		0.825305	0.0327843	-0.311679	+
540	Q9Y3Y2	CHTOP	Chromatin target of PRMT1 protein OS=Homo sapiens OX=9606 GN=CHTOP PE=1 SV=2	5			409.859	535.923	555.155	408.645	362.318	383.867	206.817	303.12	234.273	188.913	208.191	232.611	252.307	149.863	156.043	167.631		0.819206	1.07118	1.10962	0.81678	0.724184	0.767255	0.413376	0.605862	0.468253	0.37759	0.416122	0.464932	0.504299	0.299539	0.311891	0.335053			1.17395	0.111203	-0.367111		0.447253	0.112472	-0.256182	+
541	O15111	CHUK	Inhibitor of nuclear factor kappa-B kinase subunit alpha OS=Homo sapiens OX=9606 GN=CHUK PE=1 SV=2	7			1589.06	2028.41	2214.01	1416.03	1360.1	1468.33	717.891	836.023	693.695	658.208	800.913	697.094	781.96	453.707	496.479	566.916		0.817491	1.04351	1.139	0.728475	0.699702	0.755381	0.369318	0.430091	0.356871	0.338615	0.412029	0.358619	0.402279	0.233409	0.255413	0.291649			1.41347	0.0294583	-0.445148		0.337471	0.452646	-0.11549	+
542	O76071	CIAO1	Probable cytosolic iron-sulfur protein assembly protein CIAO1 OS=Homo sapiens OX=9606 GN=CIAO1 PE=1 SV=1	1			62.6617	83.9391	76.574	59.4369	54.1201	46.9677	31.2574	41.7044	30.7641	25.8359	25.9108	35.0865	40.8263	21.9844	24.1988	29.6948		0.842322	1.12834	1.02934	0.798973	0.727503	0.631358	0.420174	0.560606	0.413543	0.347296	0.348303	0.471646	0.548803	0.295523	0.325289	0.399169			1.38444	0.0196869	-0.47153	+	0.900509	0.00869987	-0.397473	+
543	Q9Y3D0	CIAO2B	Cytosolic iron-sulfur assembly component 2B OS=Homo sapiens OX=9606 GN=CIAO2B PE=1 SV=1	2			698.448	881.383	848.689	226.466	211.61	222.88	297.98	346.065	130.571	94.9048	136.344	331.574	342.986	102.988	121.564	92.0627		0.862807	1.08879	1.0484	0.279758	0.261406	0.275328	0.368101	0.427501	0.161297	0.117238	0.168429	0.4096	0.423698	0.127223	0.15017	0.113727		+	4.18422	0	-1.87073	+	2.09074	0	-1.43092	+
544	Q9BW66	CINP	Cyclin-dependent kinase 2-interacting protein OS=Homo sapiens OX=9606 GN=CINP PE=1 SV=1	1			397.47	506.072	478.268	198.333	168.291	177.924	252.525	292.408	151.979	122.257	156.964	272.007	275.337	107.821	86.6599	102.045		0.862933	1.09872	1.03835	0.430594	0.365371	0.386285	0.548248	0.634837	0.329956	0.265428	0.340779	0.590545	0.597775	0.234086	0.188144	0.221546		+	3.35086	0	-1.33929	+	1.94556	0.000222222	-0.927464	+
545	Q8TCG1	CIP2A	Protein CIP2A OS=Homo sapiens OX=9606 GN=CIP2A PE=1 SV=2	5			2209.95	2714.4	2790.41	1746.22	1623.47	1874.65	1436.48	1735.96	1212.52	1100.01	1478.77	1240.89	1336.92	713.218	812.427	884.554		0.859372	1.05554	1.08509	0.679044	0.631311	0.728986	0.558597	0.675054	0.471507	0.427755	0.575042	0.482539	0.519881	0.277346	0.315924	0.343972		+	1.97455	0.00500491	-0.551729		0.742637	0.0258382	-0.332495	+
546	Q9NZ45	CISD1	CDGSH iron-sulfur domain-containing protein 1 OS=Homo sapiens OX=9606 GN=CISD1 PE=1 SV=1	1			406.224	534.835	544.625	351.123	325.731	329.555	270.283	333.545	196.053	190.988	213.953	178.991	212.586	110.465	109.12	124.262		0.820277	1.07998	1.09975	0.709013	0.657739	0.665461	0.545775	0.673518	0.395884	0.385657	0.432029	0.361432	0.429269	0.223059	0.220343	0.250919		+	1.75742	0.0057248	-0.550152	+	1.69036	0.00103498	-0.585503	+
547	Q8N5K1	CISD2	CDGSH iron-sulfur domain-containing protein 2 OS=Homo sapiens OX=9606 GN=CISD2 PE=1 SV=1	2			519.694	692.731	697.515	500.41	423.425	488.804	367.818	406.308	272.524	220.611	280.836	389.746	400.191	181.668	241.787	226.862		0.816299	1.08809	1.09561	0.786009	0.665086	0.767779	0.577743	0.6382	0.428062	0.34652	0.441118	0.612186	0.628592	0.285351	0.379782	0.356339			1.25808	0.0443288	-0.425903	+	1.5274	0.001019	-0.591578	+
548	Q8IYA6	CKAP2L	Cytoskeleton-associated protein 2-like OS=Homo sapiens OX=9606 GN=CKAP2L PE=1 SV=4	1			16.4414	18.0451	29.6872	16.5784	8.78185	8.19124	19.114	18.1333	12.6641	9.29886	7.26842	18.853	19.0836	7.71401	6.7162	9.14902		0.768605	0.843575	1.38782	0.775009	0.410535	0.382925	0.893544	0.847698	0.592023	0.434704	0.339785	0.881342	0.892122	0.360615	0.31397	0.4277		+	1.08133	0.000643006	-0.961575	+	1.31774	0.00019195	-0.971441	+
549	Q07065	CKAP4	Cytoskeleton-associated protein 4 OS=Homo sapiens OX=9606 GN=CKAP4 PE=1 SV=2	5			1120.4	1556.89	1488.91	1226.46	1054.86	1291.45	847.902	940.479	700.936	583.932	665.305	1033.19	1006.13	576.38	701.299	765.924		0.806778	1.12109	1.07214	0.88315	0.759584	0.929948	0.610558	0.677221	0.50473	0.420478	0.479073	0.74398	0.724495	0.41504	0.504992	0.551527			0.543253	0.427445	-0.212131	+	1.55355	0.0033722	-0.46228	+
550	Q14008	CKAP5	Cytoskeleton-associated protein 5 OS=Homo sapiens OX=9606 GN=CKAP5 PE=1 SV=3	14			1413.55	1741.19	1806.82	1072.42	918.756	939.581	1299.35	1334.89	766.157	675.81	805.597	1380.65	1337.66	638.377	705.139	668.027		0.854701	1.05281	1.09249	0.648437	0.555524	0.568116	0.78565	0.807139	0.463256	0.408628	0.487103	0.834808	0.808814	0.385994	0.426361	0.403922		+	2.35408	0.00069685	-0.754712	+	2.4379	0.000190476	-0.817745	+
551	P12277	CKB	Creatine kinase B-type OS=Homo sapiens OX=9606 GN=CKB PE=1 SV=1	10			1306.4	1371.73	1382.61	1036.21	978.435	917.79	940.863	1008.15	793.024	725.835	816.5	1226.35	1274.98	969.336	970.526	1007.52		0.965144	1.01341	1.02145	0.765533	0.72285	0.678046	0.695092	0.744803	0.585872	0.536234	0.603215	0.906005	0.941932	0.716128	0.717007	0.744337			2.94125	0.0103304	-0.470962		1.63447	0.0168056	-0.324992	+
552	P12532	CKMT1A	Creatine kinase U-type, mitochondrial OS=Homo sapiens OX=9606 GN=CKMT1A PE=1 SV=1	1			47.3695	48.3636	46.2658	39.3391	50.5449	45.5036	11.832	6.81699	6.67671	9.28181	5.39099	10.0094	10.8645	6.32744	9.93667	14.2617		1.00077	1.02177	0.977454	0.831114	1.06786	0.961351	0.249974	0.144022	0.141058	0.196096	0.113895	0.211468	0.229533	0.133679	0.209931	0.301306			0.28889	0.796816	-0.0761054		0.357926	0.037649	-0.372181
553	Q7Z460	CLASP1	CLIP-associating protein 1 OS=Homo sapiens OX=9606 GN=CLASP1 PE=1 SV=1	6			801.11	970.424	1027.71	694.542	597.394	630.818	595.426	660.971	443.175	459.021	537.49	631.794	644.057	385.22	398.808	431.622		0.858564	1.04002	1.10142	0.744353	0.640238	0.676059	0.638129	0.708374	0.474959	0.491941	0.576038	0.677105	0.690247	0.412847	0.42741	0.462577		+	1.88548	0.00609194	-0.536669	+	1.29352	0.0077249	-0.391696	+
554	O75122	CLASP2	CLIP-associating protein 2 OS=Homo sapiens OX=9606 GN=CLASP2 PE=1 SV=3	1			121.669	164.493	164.346	113.054	88.2079	101.56	102.946	103.463	71.423	72.2209	85.1428	97.5686	102.55	54.3067	51.8935	65.8717		0.810212	1.09538	1.0944	0.752843	0.58739	0.676303	0.685533	0.688976	0.475616	0.48093	0.566979	0.649724	0.682896	0.361636	0.345567	0.438649		+	1.4748	0.00577601	-0.566467	+	1.59985	0.00355365	-0.4412	+
555	P51790	CLCN3	H(+)/Cl(-) exchange transporter 3 OS=Homo sapiens OX=9606 GN=CLCN3 PE=1 SV=2	1			13.1495	20.327	19.0184	16.431	17.3531	15.6036	21.5295	8.47916	5.28236	12.5963	13.8838	23.2875	22.0403	12.069	17.3331	15.7309		0.751473	1.16166	1.08687	0.939006	0.991702	0.891721	1.23038	0.484571	0.301878	0.719859	0.793437	1.33084	1.25957	0.689724	0.990559	0.898996			0.116304	0.850909	-0.0641028		0.237635	0.0327745	-0.472268	+
556	P51798	CLCN7	H(+)/Cl(-) exchange transporter 7 OS=Homo sapiens OX=9606 GN=CLCN7 PE=1 SV=2	2			128.494	145.681	138.377	127.026	119.288	148.391	112.552	133.738	104.593	86.7245	101.575	215.169	185.687	118.577	137.914	165.332		0.934384	1.05936	1.00625	0.923709	0.86744	1.07907	0.818457	0.972517	0.76058	0.630644	0.738634	1.56467	1.35028	0.862269	1.00288	1.20226			0.251333	0.822294	-0.0680472		0.996498	0.0201518	-0.334386	+
557	P56749	CLDN12	Claudin-12 OS=Homo sapiens OX=9606 GN=CLDN12 PE=1 SV=1	1			20.7198	23.8625	26.3598	19.4017	16.3556	21.6005	13.0797	16.8147	14.0997	10.5281	13.0821	20.9008	32.5239	18.1598	19.8234	20.8789		0.876199	1.0091	1.1147	0.820459	0.691646	0.913442	0.553114	0.71106	0.596248	0.445212	0.553216	0.883853	1.37537	0.767942	0.838292	0.882927			0.93653	0.232709	-0.309021		0.489517	0.114736	-0.249358	+
558	P56747	CLDN6	Claudin-6 OS=Homo sapiens OX=9606 GN=CLDN6 PE=1 SV=2	2			37.553	56.5356	66.453	62.9882	49.4278	69.8058	34.868	38.4449	23.4976	19.2512	28.6369	49.2192	50.7583	28.2866	41.9025	40.875		0.701743	1.05647	1.24179	1.17704	0.923645	1.30444	0.651569	0.71841	0.439094	0.359742	0.53513	0.919747	0.948507	0.528584	0.783021	0.763821			0.294244	0.474385	0.207776	+	1.20879	0.00106584	-0.640569	+
559	O95471	CLDN7	Claudin-7 OS=Homo sapiens OX=9606 GN=CLDN7 PE=1 SV=4	1			239.496	346.24	294.24	315.72	248.032	364.078	106.52	103.777	69.1317	60.3024	63.8742	150.336	104.048	64.0824	70.9676	99.7119		0.816486	1.1804	1.00312	1.07635	0.845587	1.24121	0.363146	0.353795	0.235683	0.205582	0.217759	0.512523	0.354719	0.218469	0.241942	0.339936			0.12261	0.822643	0.0748841	+	2.59829	0.00049162	-0.708635	+
560	Q9NY35	CLDND1	Claudin domain-containing protein 1 OS=Homo sapiens OX=9606 GN=CLDND1 PE=1 SV=1	1			184.698	270.614	238.325	151.94	151.512	194.281	124.507	141.32	95.3098	72.604	96.6611	205.975	169.756	105.855	96.904	124.237		0.798824	1.17041	1.03076	0.657145	0.655294	0.840271	0.538496	0.611213	0.412218	0.314014	0.418062	0.890848	0.7342	0.457826	0.419113	0.537329			1.10223	0.0268244	-0.471085	+	1.3151	0.00117661	-0.600988	+
561	Q2KHT3	CLEC16A	Protein CLEC16A OS=Homo sapiens OX=9606 GN=CLEC16A PE=1 SV=2	1			199.792	245.482	239.177	186.729	164.039	166.271	112.397	124.45	112.917	94.1136	104.056	175.59	171.72	144.971	149.75	143.214		0.875703	1.07597	1.04833	0.818447	0.718995	0.728778	0.492644	0.545474	0.494924	0.412507	0.456085	0.769624	0.752662	0.635419	0.656365	0.627718			1.65283	0.0509196	-0.401224		0.737171	0.188631	-0.193719
562	O00299	CLIC1	Chloride intracellular channel protein 1 OS=Homo sapiens OX=9606 GN=CLIC1 PE=1 SV=4	11			1333.74	1676.13	1857.91	1109.01	1053.86	1014.61	1056.46	1276.34	824.418	757.073	922.42	964.179	1102.1	613.133	636.576	657.542		0.82198	1.03299	1.14503	0.68348	0.649491	0.625301	0.651094	0.786605	0.508087	0.466582	0.568485	0.594221	0.679221	0.377872	0.39232	0.405241		+	1.83722	0.00329098	-0.602804	+	1.32908	0.0032339	-0.481143	+
563	Q9Y696	CLIC4	Chloride intracellular channel protein 4 OS=Homo sapiens OX=9606 GN=CLIC4 PE=1 SV=4	8			2008.56	2550.95	2747.59	1368.89	1218.2	1187.51	1566.51	1971.34	1057.45	891.62	1153.68	2149.46	2232.69	941.411	891.243	994.598		0.824634	1.04732	1.12805	0.562011	0.500144	0.487544	0.643146	0.809353	0.434146	0.366063	0.473654	0.882481	0.916652	0.386505	0.365908	0.408342		+	2.48298	0.000209567	-0.943222	+	1.58734	0.000470588	-0.772921	+
564	Q14677	CLINT1	Clathrin interactor 1 OS=Homo sapiens OX=9606 GN=CLINT1 PE=1 SV=1	2			478.43	592.702	656.917	433.118	363.168	404.969	311.705	335.2	214.417	209.81	229.507	379.123	371.131	271.069	255.462	253.221		0.830584	1.02897	1.14045	0.75192	0.630482	0.703051	0.541139	0.581928	0.372241	0.364243	0.398438	0.658181	0.644306	0.470593	0.443498	0.439607			1.54683	0.0101142	-0.516039	+	2.53029	0.00112084	-0.569921	+
565	P49759	CLK1	Dual specificity protein kinase CLK1 OS=Homo sapiens OX=9606 GN=CLK1 PE=1 SV=2	4			1005.96	1225.34	1244.5	754.105	667.368	697.175	1081.33	1166.61	719.149	640.124	705.215	759.712	803.571	411.412	421.441	436.757		0.868255	1.0576	1.07414	0.650876	0.576012	0.601739	0.933307	1.00691	0.620705	0.552498	0.608679	0.655716	0.693571	0.355094	0.36375	0.37697		+	2.50533	0.000582237	-0.709446	+	2.54237	0.000481928	-0.708591	+
566	P49761	CLK3	Dual specificity protein kinase CLK3 OS=Homo sapiens OX=9606 GN=CLK3 PE=1 SV=3	6			868.466	1156.5	1163.13	821.277	713.551	718.501	724.161	840.759	598.804	602.892	632.493	656.745	765.538	458.39	447.932	517.563		0.817227	1.08827	1.09451	0.772822	0.671452	0.67611	0.681436	0.791155	0.563475	0.567322	0.595176	0.617997	0.720372	0.431345	0.421504	0.487027			1.47722	0.0141111	-0.490743		1.57413	0.010535	-0.352324	+
567	P54105	CLNS1A	Methylosome subunit pICln OS=Homo sapiens OX=9606 GN=CLNS1A PE=1 SV=1	2			160.507	217.977	234.148	143.097	140.783	95.852	104.69	130.49	69.3827	72.424	106.631	134.236	134.261	69.9444	53.0642	65.3742		0.785987	1.06741	1.1466	0.700732	0.689401	0.469378	0.512657	0.638997	0.33976	0.354653	0.522162	0.657341	0.657463	0.342511	0.25985	0.320131		+	1.29183	0.00218926	-0.694962	+	0.800826	0.00333818	-0.525093	+
568	Q92989	CLP1	Polyribonucleotide 5'-hydroxyl-kinase Clp1 OS=Homo sapiens OX=9606 GN=CLP1 PE=1 SV=1	5			1240.33	1512.87	1555.23	906.169	820.999	834.737	763.881	773.761	459.404	449.765	511.928	804.671	800.098	384.104	420.79	413.674		0.863653	1.05343	1.08292	0.630974	0.571669	0.581235	0.531897	0.538777	0.319887	0.313176	0.35646	0.5603	0.557116	0.267455	0.293	0.288045		+	2.57689	0.000706587	-0.744147	+	2.58635	0.000473628	-0.700993	+
569	Q16740	CLPP	ATP-dependent Clp protease proteolytic subunit, mitochondrial OS=Homo sapiens OX=9606 GN=CLPP PE=1 SV=1	7			2880.1	3692.38	3080.22	1264.41	1173.78	1227.24	1245.66	1432.91	676.08	519.216	752.567	1405.31	1406.01	541.308	491.814	536.421		0.895117	1.14757	0.957313	0.392971	0.364804	0.381419	0.387143	0.44534	0.210122	0.161369	0.233893	0.436762	0.436979	0.168235	0.152853	0.166716		+	3.62277	0	-1.38955	+	1.77317	0.00027991	-1.05807	+
570	O96005	CLPTM1	Cleft lip and palate transmembrane protein 1 OS=Homo sapiens OX=9606 GN=CLPTM1 PE=1 SV=1	5			952.744	1288.44	1363.42	1091.08	1013.33	1093.11	688.454	743.533	600.941	532.48	642.751	718.574	733.378	456.506	547.773	583.652		0.792939	1.07233	1.13473	0.908072	0.843363	0.909762	0.572979	0.618819	0.500145	0.443167	0.534942	0.598047	0.610368	0.379936	0.455894	0.485755			0.403348	0.554242	-0.156572		1.06042	0.0509374	-0.277475	+
571	Q96KA5	CLPTM1L	Cleft lip and palate transmembrane protein 1-like protein OS=Homo sapiens OX=9606 GN=CLPTM1L PE=1 SV=1	3			734.38	945.324	958.887	609.608	552.501	614.194	477.747	530.479	346.286	314.956	422.909	529.028	546.602	279.875	339.563	364.842		0.834968	1.07481	1.09023	0.693106	0.628177	0.69832	0.543184	0.603139	0.393717	0.358096	0.480835	0.601489	0.62147	0.31821	0.386073	0.414815		+	1.85785	0.00481818	-0.562048	+	1.18862	0.0032152	-0.489284	+
572	O76031	CLPX	ATP-dependent Clp protease ATP-binding subunit clpX-like, mitochondrial OS=Homo sapiens OX=9606 GN=CLPX PE=1 SV=2	14			4931.55	6150.84	6134.23	3958.52	3801.46	3912.11	2482.53	2861.04	2077.93	1933.43	2341.23	2315.72	2462.62	1366.54	1396.88	1575.79		0.859324	1.07179	1.06889	0.689773	0.662405	0.681686	0.432581	0.498537	0.36208	0.336901	0.40796	0.403515	0.429112	0.23812	0.243407	0.274582		+	2.17742	0.00460789	-0.553415		1.09803	0.0183574	-0.336317	+
573	P09496	CLTA	Clathrin light chain A OS=Homo sapiens OX=9606 GN=CLTA PE=1 SV=1	6			796.496	1097.27	1156.77	824.197	838.772	918.779	441.151	485.154	347.486	290.051	360.064	520.771	521.396	332.238	381.347	395.69		0.783301	1.07909	1.13761	0.810543	0.824877	0.903558	0.433843	0.477117	0.341729	0.285246	0.354099	0.512144	0.512758	0.326734	0.37503	0.389135			0.567368	0.407037	-0.223519	+	1.42909	0.00313851	-0.482686	+
574	P09497	CLTB	Clathrin light chain B OS=Homo sapiens OX=9606 GN=CLTB PE=1 SV=1	3			2143.37	2905.62	2650.21	1620.57	1564.23	1492.04	989.456	1299.4	803.801	665.772	819.215	1725.05	1593.44	779.13	844.284	822.115		0.835166	1.13218	1.03266	0.631457	0.609504	0.581375	0.385542	0.506312	0.313202	0.259419	0.319208	0.672167	0.620885	0.303589	0.328976	0.320338		+	2.20632	0.000768533	-0.708531	+	1.24516	0.00141376	-0.577835	+
575	Q00610	CLTC	Clathrin heavy chain 1 OS=Homo sapiens OX=9606 GN=CLTC PE=1 SV=5	18			4306.29	5576.35	6034.4	4441.21	4176.21	4538.69	2429.81	3032.74	2333.04	2191.13	2787.63	3057.49	3240.48	2049.14	2340.39	2728.1		0.811638	1.05102	1.13735	0.837067	0.787121	0.85544	0.457964	0.571603	0.439725	0.412978	0.525405	0.576267	0.610757	0.386216	0.44111	0.514185			0.797389	0.33293	-0.261185		0.365836	0.297713	-0.163091	+
576	P10909	CLU	Clusterin OS=Homo sapiens OX=9606 GN=CLU PE=1 SV=1	3			223.65	274.068	289.883	169.653	133.471	141.551	180.73	193.184	120.591	97.3068	130.734	177.56	204.81	92.9399	98.928	88.4028		0.851891	1.04393	1.10417	0.646214	0.508396	0.539173	0.688407	0.735845	0.459335	0.370645	0.49797	0.676332	0.780129	0.354011	0.37682	0.336729		+	2.22794	0.000416452	-0.823604	+	1.59313	0.000707483	-0.696116	+
577	O75153	CLUH	Clustered mitochondria protein homolog OS=Homo sapiens OX=9606 GN=CLUH PE=1 SV=2	9			2557.96	3126.29	2820.57	1927.96	1622.93	1668.73	1617.66	1747.67	1057.65	992.347	1173.25	1386.19	1418.16	733.264	730.643	805.941		0.902298	1.10277	0.994931	0.680071	0.572474	0.58863	0.570615	0.616475	0.373077	0.350042	0.413854	0.488966	0.500243	0.258652	0.257728	0.284289		+	2.46116	0.000630418	-0.703669	+	2.13101	0.00114429	-0.649574	+
578	Q8NFW8	CMAS	N-acylneuraminate cytidylyltransferase OS=Homo sapiens OX=9606 GN=CMAS PE=1 SV=2	8			972.607	1214.16	1312.93	673.635	621.95	656.562	1224.95	1204.14	629.414	608.054	704.112	1420.38	1415.57	599.85	614.725	656.356		0.833735	1.0408	1.12547	0.577451	0.533146	0.562816	1.05005	1.03221	0.539544	0.521234	0.603577	1.21757	1.21345	0.514202	0.526953	0.56264		+	2.46461	0.000465517	-0.831588	+	2.79103	0.000256198	-0.910953	+
579	Q96DG6	CMBL	Carboxymethylenebutenolidase homolog OS=Homo sapiens OX=9606 GN=CMBL PE=1 SV=1	4			1555.44	2028.89	2072.96	1120.2	961.179	958.587	887.545	1034.84	618.878	510.015	698.099	1197.96	1219.22	639.922	610.161	653.599		0.824833	1.0759	1.09927	0.59403	0.509703	0.508328	0.470656	0.548765	0.328184	0.270455	0.370194	0.635265	0.646539	0.339344	0.323562	0.346597		+	2.36272	0.00035461	-0.88803	+	1.40964	0.00112046	-0.666036	+
580	Q8IY22	CMIP	C-Maf-inducing protein OS=Homo sapiens OX=9606 GN=CMIP PE=1 SV=3	1			28.9556	32.5315	40.9673	19.7347	22.5773	25.2638	26.8605	27.7493	25.8029	19.066	27.1614	30.375	36.3219	32.2703	29.1045	31.2839		0.847858	0.952565	1.19958	0.577858	0.661093	0.739757	0.786511	0.812536	0.755543	0.558278	0.795322	0.88942	1.06355	0.944917	0.852218	0.916034		+	1.52357	0.00434687	-0.592491		0.398676	0.206489	-0.202271
581	Q9BQ75	CMSS1	Protein CMSS1 OS=Homo sapiens OX=9606 GN=CMSS1 PE=1 SV=2	2			545.54	653.589	688.81	379.666	340.946	387.62	462.797	492.391	265.167	236.713	282.871	342.59	349.249	152.31	156.927	175.989		0.866882	1.03858	1.09454	0.603302	0.541775	0.615942	0.7354	0.782426	0.421359	0.376145	0.449492	0.544387	0.554969	0.242026	0.249362	0.279653		+	2.54691	0.000549189	-0.763753	+	2.46615	0.000219469	-0.871697	+
582	Q8IZV2	CMTM8	CKLF-like MARVEL transmembrane domain-containing protein 8 OS=Homo sapiens OX=9606 GN=CMTM8 PE=1 SV=2	2			45.848	216.456	68.6841	73.4774	37.7483	38.6126	56.2018	62.7517	34.1083	36.6772	48.8333	73.7601	58.5592	36.6249	36.1898	40.5369		0.415556	1.96191	0.622537	0.665982	0.342142	0.349976	0.5094	0.568767	0.30915	0.332434	0.442614	0.668545	0.530767	0.33196	0.328016	0.367417		+	0.528795	0.00395828	-0.890018	+	1.16437	0.00144121	-0.592512	+
583	Q8IYT2	CMTR2	Cap-specific mRNA (nucleoside-2'-O-)-methyltransferase 2 OS=Homo sapiens OX=9606 GN=CMTR2 PE=1 SV=2	1			47.9189	53.1114	71.5768	39.5035	38.1006	42.1762	32.7258	35.6269	29.3591	30.3009	33.5533	40.253	38.6967	22.121	21.5673	20.9982		0.832855	0.923103	1.24404	0.686591	0.662208	0.733044	0.568791	0.619214	0.510276	0.526645	0.583174	0.699618	0.672569	0.384474	0.374851	0.364959			1.32693	0.0129927	-0.506962		0.671596	0.341129	-0.13849	+
584	Q96KP4	CNDP2	Cytosolic non-specific dipeptidase OS=Homo sapiens OX=9606 GN=CNDP2 PE=1 SV=2	6			1146.09	1440.47	1455.17	1069.64	1077.91	996.37	888.954	964.782	817.166	727.339	841.253	1341.72	1354.61	1120.64	1085.1	1144.63		0.850693	1.0692	1.08011	0.793947	0.800086	0.739562	0.659832	0.716116	0.606547	0.539872	0.624425	0.9959	1.00547	0.831802	0.805422	0.849609			1.4001	0.115886	-0.354777		1.00789	0.12018	-0.222557
585	Q9P003	CNIH4	Protein cornichon homolog 4 OS=Homo sapiens OX=9606 GN=CNIH4 PE=1 SV=1	2			263.442	381.314	367.193	294.27	258.636	306.244	178.616	236.451	185.599	159.865	189.745	321.218	338.774	261.632	213.717	329.775		0.780994	1.13043	1.08857	0.872386	0.766746	0.907884	0.529521	0.700977	0.550222	0.473932	0.562514	0.952275	1.00432	0.775628	0.63358	0.977643			0.525535	0.415426	-0.220753		0.476699	0.182288	-0.208166
586	Q99439	CNN2	Calponin-2 OS=Homo sapiens OX=9606 GN=CNN2 PE=1 SV=4	3			731.951	888.667	921.783	389.291	363.864	358.092	631.167	748.637	333.024	310.655	413.007	505.697	563.289	233.488	219.05	229.606		0.863693	1.04862	1.08769	0.459358	0.429355	0.422544	0.744769	0.883382	0.392964	0.366569	0.487343	0.596716	0.664674	0.275513	0.258476	0.270932		+	3.38522	0	-1.18775	+	1.88169	0.000241715	-0.975442	+
587	Q15417	CNN3	Calponin-3 OS=Homo sapiens OX=9606 GN=CNN3 PE=1 SV=1	2			368.205	439.729	471.618	295.597	263.1	272.319	272.679	297.298	215.859	191.585	219.38	298.581	313.255	171.508	162.826	179.419		0.863283	1.03098	1.10574	0.693048	0.616857	0.638471	0.639315	0.697036	0.506097	0.449185	0.514352	0.700044	0.734448	0.402113	0.381757	0.420661		+	2.20203	0.00226148	-0.616734	+	1.78227	0.00335034	-0.449055	+
588	Q9H8M5	CNNM2	Metal transporter CNNM2 OS=Homo sapiens OX=9606 GN=CNNM2 PE=1 SV=2	2			40.6282	57.089	58.2584	42.6675	35.106	32.6927	44.2933	43.1806	34.507	25.8874	27.9636	50.6511	57.526	42.2948	49.7823	44.8154		0.781434	1.09804	1.12053	0.820657	0.675221	0.628804	0.851927	0.830526	0.6637	0.497912	0.537846	0.974212	1.10644	0.813489	0.957502	0.861969			1.12501	0.020096	-0.488112	+	1.44076	0.00131303	-0.581173
589	Q8NE01	CNNM3	Metal transporter CNNM3 OS=Homo sapiens OX=9606 GN=CNNM3 PE=1 SV=1	2			528.523	678.506	722.049	506.702	490.028	591.021	407.964	534.915	447.157	386.808	418.272	750.069	852.067	749.09	712.316	705.801		0.821931	1.05518	1.12289	0.787996	0.762066	0.919125	0.634444	0.831871	0.695395	0.601543	0.650474	1.16647	1.32509	1.16495	1.10776	1.09762			0.783426	0.313722	-0.273071		0.406925	0.286278	-0.164929
590	Q6P4Q7	CNNM4	Metal transporter CNNM4 OS=Homo sapiens OX=9606 GN=CNNM4 PE=1 SV=3	1			53.8632	63.5448	80.0136	43.3105	45.661	55.3452	50.5525	58.0715	41.5188	35.435	38.906	74.9112	76.485	66.4552	65.8153	66.4694		0.8185	0.965621	1.21588	0.658142	0.69386	0.84102	0.768191	0.882449	0.630916	0.538467	0.591212	1.13834	1.16226	1.00985	1.00012	1.01006			1.04979	0.0438091	-0.441061	+	1.64326	0.00235346	-0.491496
591	A5YKK6	CNOT1	CCR4-NOT transcription complex subunit 1 OS=Homo sapiens OX=9606 GN=CNOT1 PE=1 SV=2	12			2028.46	2524.97	2721.04	1758.48	1653.24	1831.26	1442.88	1525.05	1139.96	1042.86	1307.66	1686.02	1753.84	1057.71	1096.22	1222.4		0.836539	1.0413	1.12216	0.725199	0.681798	0.755214	0.595045	0.628932	0.470121	0.430077	0.539281	0.695317	0.723286	0.436201	0.452082	0.504119			1.58361	0.0192802	-0.462783		1.17851	0.0126179	-0.356732	+
592	Q9H9A5	CNOT10	CCR4-NOT transcription complex subunit 10 OS=Homo sapiens OX=9606 GN=CNOT10 PE=1 SV=1	2			306.864	409.888	402.85	229.238	230.175	228.16	204.48	234.519	142.876	130.757	180.57	236.006	224.239	129.604	117.92	139.782		0.822249	1.0983	1.07945	0.614249	0.616759	0.61136	0.547909	0.628399	0.38284	0.350366	0.483842	0.632384	0.600854	0.347277	0.315969	0.374549		+	2.15862	0.00116155	-0.69115	+	1.17443	0.00175462	-0.546096	+
593	Q9UKZ1	CNOT11	CCR4-NOT transcription complex subunit 11 OS=Homo sapiens OX=9606 GN=CNOT11 PE=1 SV=1	3			556.321	628.512	601.242	387.23	347.994	388.366	299.904	400.966	274.233	225.903	276.531	427.123	455.469	255.012	190.285	289.623		0.934431	1.05569	1.00988	0.650415	0.584512	0.652323	0.503737	0.673487	0.460618	0.37944	0.464478	0.717422	0.765033	0.428334	0.319614	0.486468		+	3.09841	0.000758775	-0.668711	+	0.919094	0.00683057	-0.427808	+
594	O75175	CNOT3	CCR4-NOT transcription complex subunit 3 OS=Homo sapiens OX=9606 GN=CNOT3 PE=1 SV=1	3			462.282	538.6	550.761	375.755	333.139	320.382	331.524	371.112	240.142	210.205	268.625	339.005	377.522	207.921	200.794	236.133		0.893792	1.04135	1.06486	0.726498	0.644102	0.619438	0.64098	0.717521	0.464299	0.406418	0.519369	0.655444	0.729914	0.402002	0.388222	0.456548		+	2.30541	0.00299094	-0.591235	+	1.50423	0.00142052	-0.556725	+
595	Q9ULM6	CNOT6	CCR4-NOT transcription complex subunit 6 OS=Homo sapiens OX=9606 GN=CNOT6 PE=1 SV=2	1			168.481	192.748	223.01	121.922	95.3122	122.028	95.361	108.089	72.8335	65.3489	78.3173	108.242	119.515	61.7387	68.9671	60.4186		0.865131	0.989739	1.14513	0.626055	0.489417	0.6266	0.489668	0.555025	0.373992	0.335559	0.40215	0.55581	0.613696	0.317021	0.354138	0.310243		+	2.03448	0.000716599	-0.784169	+	1.60174	0.00221944	-0.496408	+
596	Q9UIV1	CNOT7	CCR4-NOT transcription complex subunit 7 OS=Homo sapiens OX=9606 GN=CNOT7 PE=1 SV=3	2			438.63	549.011	570.761	384.993	314.358	362.593	290.091	302.903	230.682	208.972	240.139	329.528	338.993	210.795	209.655	234.824		0.844384	1.05687	1.09874	0.74113	0.605155	0.698009	0.558439	0.583103	0.444074	0.402281	0.462279	0.634358	0.652578	0.405791	0.403596	0.452048		+	1.69671	0.00586392	-0.549045	+	1.77721	0.0061958	-0.389986	+
597	P09543	CNP	2',3'-cyclic-nucleotide 3'-phosphodiesterase OS=Homo sapiens OX=9606 GN=CNP PE=1 SV=2	8			2821.47	3586.59	3747.26	2251.48	1933.51	2239.52	1250.36	1394.91	825.089	788.66	944.849	1421.07	1439.37	725.263	774.19	838.467		0.833495	1.05952	1.10698	0.665113	0.571181	0.66158	0.369371	0.412073	0.243741	0.232979	0.279119	0.419801	0.425207	0.214251	0.228705	0.247693		+	1.95511	0.00178369	-0.653203	+	1.91149	0.00116178	-0.635174	+
598	Q8WTW3	COG1	Conserved oligomeric Golgi complex subunit 1 OS=Homo sapiens OX=9606 GN=COG1 PE=1 SV=1	9			993.786	1254.42	1256.74	766.827	782.231	773.776	716.943	796.139	555.486	499.76	634.302	782.055	805.764	424.866	462.913	515.112		0.850615	1.0737	1.07569	0.656353	0.669538	0.662301	0.613655	0.681442	0.475459	0.427761	0.54292	0.669387	0.68968	0.363657	0.396223	0.440902		+	2.18255	0.00328946	-0.585029	+	1.2634	0.00496337	-0.430721	+
599	P38432	COIL	Coilin OS=Homo sapiens OX=9606 GN=COIL PE=1 SV=1	3			733.467	881.477	943.832	534.787	509.478	503.191	597.43	640.832	407.959	346.601	358.779	595.234	574.716	319.888	273.182	294.734		0.859943	1.03347	1.10658	0.627003	0.59733	0.589959	0.700448	0.751334	0.478306	0.406367	0.420645	0.697874	0.673817	0.375048	0.320288	0.345557		+	2.51855	0.000611927	-0.718032	+	2.29693	0.000515222	-0.741093	+
600	Q8NBJ5	COLGALT1	Procollagen galactosyltransferase 1 OS=Homo sapiens OX=9606 GN=COLGALT1 PE=1 SV=1	3			668.803	796.201	813.795	601.856	544.272	543.352	610.839	674.585	503.207	462.047	518.311	747.653	786.585	553.41	550.249	545.912		0.880468	1.04819	1.07135	0.792333	0.716525	0.715314	0.804159	0.88808	0.662463	0.608277	0.682348	0.984272	1.03553	0.728555	0.724393	0.718684			1.86191	0.0293485	-0.427915	+	1.69621	0.00767631	-0.37806	+
601	Q8N668	COMMD1	COMM domain-containing protein 1 OS=Homo sapiens OX=9606 GN=COMMD1 PE=1 SV=1	1			39.8315	52.8957	64.7957	29.2473	25.6598	24.0275	37.5849	37.7786	18.8907	17.5315	16.4044	33.9091	34.8321	13.5173	13.404	16.0563		0.758585	1.00739	1.23402	0.55701	0.488687	0.4576	0.715799	0.719488	0.359771	0.333885	0.312419	0.645794	0.663372	0.257435	0.255277	0.30579		+	1.94069	0.000186613	-0.973486	+	3.14617	0	-1.09996	+
602	Q9H0A8	COMMD4	COMM domain-containing protein 4 OS=Homo sapiens OX=9606 GN=COMMD4 PE=1 SV=1	1			126.853	135.188	159.274	89.6346	74.2816	76.0219	65.481	76.9661	49.4834	41.6881	46.155	68.6562	79.7057	37.1297	40.8646	40.4275		0.903265	0.962615	1.13412	0.638249	0.528927	0.541319	0.466262	0.548042	0.35235	0.296843	0.32865	0.488871	0.567549	0.264384	0.290979	0.287867		+	2.47491	0.000426316	-0.810648	+	1.81519	0.0011437	-0.636627	+
603	P21964	COMT	Catechol O-methyltransferase OS=Homo sapiens OX=9606 GN=COMT PE=1 SV=2	7			2466.18	3040.28	3054.66	1864.81	1665.76	1817.72	1461.41	1590.12	1029.66	950.428	1145.95	1560.18	1669.43	838.516	882.285	977.994		0.864202	1.06538	1.07042	0.653469	0.583718	0.636968	0.512109	0.557212	0.360815	0.33305	0.401565	0.546721	0.585004	0.293834	0.309172	0.34271		+	2.39855	0.00132888	-0.673385	+	1.81227	0.00130274	-0.553128	+
604	P53621	COPA	Coatomer subunit alpha OS=Homo sapiens OX=9606 GN=COPA PE=1 SV=2	18			2914.11	3629.91	3644.06	2171.09	1917.19	2065.39	2262.2	2453.8	1505.02	1399.67	1665.65	2262.86	2366.6	1222.01	1249.96	1319.88		0.858094	1.06887	1.07304	0.639303	0.564539	0.608178	0.666131	0.72255	0.443171	0.412149	0.49047	0.666326	0.696873	0.359835	0.368065	0.388654		+	2.43251	0.000609294	-0.72157	+	2.05404	0.00105783	-0.63272	+
605	P53618	COPB1	Coatomer subunit beta OS=Homo sapiens OX=9606 GN=COPB1 PE=1 SV=3	16			5814.15	7301.28	7142.2	4735.72	4384.75	4672.59	3603.51	4128.45	2771.53	2683.43	3293.08	4313.2	4499.7	2536.26	2805.26	3156.01		0.861031	1.08126	1.05771	0.701324	0.649348	0.691975	0.533652	0.611392	0.410442	0.397395	0.48768	0.638752	0.666371	0.375601	0.415438	0.467381		+	2.11831	0.0048402	-0.547928	+	1.21923	0.00651453	-0.409435	+
606	P35606	COPB2	Coatomer subunit beta' OS=Homo sapiens OX=9606 GN=COPB2 PE=1 SV=2	13			4307.06	5338.61	5675.1	3741.22	3197.04	3407.98	3636.54	4233.76	2879.69	2641.47	3249.08	3954.2	4134.69	2517.9	2686.22	2983.47		0.843377	1.04537	1.11126	0.732578	0.626021	0.667325	0.71208	0.829024	0.56388	0.517233	0.636211	0.774282	0.809624	0.493037	0.525996	0.584201		+	1.81771	0.00493164	-0.55955	+	1.27429	0.00496154	-0.429824	+
607	O14579	COPE	Coatomer subunit epsilon OS=Homo sapiens OX=9606 GN=COPE PE=1 SV=3	9			2084.61	2770.28	2723.94	1554.33	1465.83	1556.27	1398.51	1323.12	792.434	662.692	795.329	1882.95	1748.45	652.854	886.028	813.872		0.825171	1.09659	1.07824	0.615265	0.580233	0.616033	0.553585	0.523743	0.313677	0.26232	0.314823	0.745346	0.692106	0.258425	0.350725	0.322163		+	2.20733	0.000626468	-0.716467	+	2.2994	0.000208403	-0.863785	+
608	Q9Y678	COPG1	Coatomer subunit gamma-1 OS=Homo sapiens OX=9606 GN=COPG1 PE=1 SV=1	16			3395.13	4352.22	4498.25	2662.97	2420.17	2501.24	2269.91	2543.95	1702.56	1603.33	1967.76	2434.54	2538.58	1372.64	1451.63	1554.56		0.831759	1.06623	1.10201	0.65239	0.592908	0.612769	0.556096	0.623232	0.417103	0.392793	0.482074	0.596428	0.621916	0.336278	0.355629	0.380845		+	2.14727	0.00137949	-0.681265	+	1.41772	0.0034	-0.456409	+
609	Q9UBF2	COPG2	Coatomer subunit gamma-2 OS=Homo sapiens OX=9606 GN=COPG2 PE=1 SV=1	3			632.871	754.965	826.771	500.396	458.498	482.514	452.512	487.728	327.473	301.827	372.936	471.819	506.551	249.92	265.868	316.314		0.857314	1.02271	1.11998	0.677858	0.621101	0.653634	0.612992	0.660697	0.443609	0.408868	0.505195	0.639146	0.686195	0.338552	0.360156	0.428492		+	2.16883	0.00239643	-0.611751	+	1.57803	0.00229441	-0.497341	+
610	P61201	COPS2	COP9 signalosome complex subunit 2 OS=Homo sapiens OX=9606 GN=COPS2 PE=1 SV=1	8			1834.45	2360.76	2328.56	1615.19	1407.39	1512.75	1076.65	1254.84	900.979	872.328	1013.13	1100.13	1117.74	663.671	731.127	825.983		0.843584	1.08561	1.0708	0.742756	0.647198	0.695648	0.495105	0.577047	0.414321	0.401146	0.465895	0.505902	0.514	0.305194	0.336214	0.379834		+	1.77037	0.00849814	-0.517379		1.15582	0.0202698	-0.326584	+
611	Q9UNS2	COPS3	COP9 signalosome complex subunit 3 OS=Homo sapiens OX=9606 GN=COPS3 PE=1 SV=3	3			352.455	458.357	440.662	277.921	252.259	267.971	244.046	240.141	187.619	177.509	177.35	287.464	281.154	180.199	177.241	188.311		0.844896	1.09876	1.05634	0.666225	0.604709	0.642373	0.585021	0.57566	0.449755	0.42552	0.425139	0.689101	0.673975	0.431968	0.424877	0.451414		+	2.16529	0.00177975	-0.640642	+	2.88237	0.00342857	-0.421418	+
612	Q9BT78	COPS4	COP9 signalosome complex subunit 4 OS=Homo sapiens OX=9606 GN=COPS4 PE=1 SV=1	8			1857.54	2338.92	2402.56	1365.23	1244.76	1193.52	1063.92	1215.94	729.077	618.85	811.125	1106.47	1165.04	563.239	588.207	596.965		0.844462	1.0633	1.09223	0.620651	0.565884	0.54259	0.483672	0.552782	0.331448	0.281337	0.368748	0.503016	0.529642	0.256056	0.267407	0.271388		+	2.41479	0.000379836	-0.787858	+	1.58089	0.00106605	-0.669131	+
613	Q92905	COPS5	COP9 signalosome complex subunit 5 OS=Homo sapiens OX=9606 GN=COPS5 PE=1 SV=4	2			449.324	543.001	581.836	329.387	303.604	324.6	289.573	324.307	187.305	162.063	204.791	334.885	335.172	166.829	158.018	195.324		0.856311	1.03484	1.10885	0.627738	0.578602	0.618615	0.551862	0.618057	0.356962	0.308856	0.390286	0.638216	0.638763	0.317939	0.301147	0.372244		+	2.42547	0.000570048	-0.709562	+	1.867	0.000458811	-0.736945	+
614	Q7L5N1	COPS6	COP9 signalosome complex subunit 6 OS=Homo sapiens OX=9606 GN=COPS6 PE=1 SV=1	2			601.313	662.145	682.164	378.978	345.998	351.199	412.432	427.044	231.155	192.354	246.266	474.233	419.472	200.814	198.951	212.404		0.927179	1.02098	1.05184	0.584355	0.533502	0.541522	0.635939	0.658469	0.356423	0.296595	0.379723	0.731231	0.646794	0.30964	0.306767	0.327511		+	3.62599	0.000186992	-0.853405	+	2.14882	0.000227941	-0.918323	+
615	Q99627	COPS8	COP9 signalosome complex subunit 8 OS=Homo sapiens OX=9606 GN=COPS8 PE=1 SV=1	2			608.011	707.628	785.574	265.195	272.049	237.191	328.968	408.257	167.705	143.824	202.667	370.923	334.858	136.246	138.363	141.547		0.868086	1.01031	1.1216	0.378631	0.388417	0.338649	0.469683	0.582888	0.23944	0.205344	0.289357	0.529584	0.478092	0.194525	0.197547	0.202093		+	3.50591	0	-1.43462	+	1.83397	0	-1.1106	+
616	Q9H8M1	COQ10B	Coenzyme Q-binding protein COQ10 homolog B, mitochondrial OS=Homo sapiens OX=9606 GN=COQ10B PE=2 SV=1	1			67.5939	95.3898	98.5278	49.8444	51.9089	48.664	54.2783	70.0923	39.7054	36.7401	42.3485	81.1545	66.3041	34.648	33.5855	40.0767		0.775422	1.09429	1.13029	0.571804	0.595487	0.558262	0.622668	0.804083	0.455491	0.421474	0.485812	0.930986	0.760625	0.397474	0.385285	0.459751		+	1.93914	0.000673644	-0.77833	+	1.57518	0.00108886	-0.641815	+
617	Q96D53	COQ8B	Atypical kinase COQ8B, mitochondrial OS=Homo sapiens OX=9606 GN=COQ8B PE=1 SV=2	2			68.8311	85.2265	92.1483	54.7175	50.7437	46.934	53.045	58.5552	36.2973	28.0723	36.5566	62.8219	57.0243	38.4365	30.4701	28.5724		0.838702	1.03848	1.12282	0.666729	0.618308	0.571887	0.646349	0.713491	0.44228	0.342059	0.445439	0.76548	0.694837	0.468346	0.371276	0.348153		+	2.07844	0.00137143	-0.684152	+	1.64595	0.000430528	-0.738793	+
618	Q9ULV4	CORO1C	Coronin-1C OS=Homo sapiens OX=9606 GN=CORO1C PE=1 SV=1	3			467.317	525.832	526.599	331.691	295.294	326.854	639.205	707.722	498.819	530.137	687.665	464.978	482.584	292.101	322.429	386.099		0.922489	1.038	1.03951	0.654762	0.582914	0.645214	1.2618	1.39705	0.984674	1.0465	1.35746	0.917872	0.952626	0.576611	0.636479	0.762164		+	3.00648	0.000761049	-0.67169		0.542984	0.111783	-0.247535	+
619	P57737	CORO7	Coronin-7 OS=Homo sapiens OX=9606 GN=CORO7 PE=1 SV=2	1			77.508	104.791	107.337	64.8979	51.0252	50.6817	53.575	59.7941	43.3801	45.761	43.8887	52.5326	51.8113	35.0535	32.9219	36.762		0.802815	1.08541	1.11178	0.672201	0.52851	0.524952	0.554921	0.619337	0.449324	0.473985	0.454592	0.544124	0.536653	0.363078	0.340999	0.380774		+	1.84284	0.000688716	-0.792339	+	1.8855	0.00941625	-0.352448	+
620	Q14019	COTL1	Coactosin-like protein OS=Homo sapiens OX=9606 GN=COTL1 PE=1 SV=3	3			1013.07	1274.05	1342.63	886.177	1005.65	840.369	658.208	801.427	585.902	544.757	654.882	679.585	748.667	550.421	526.406	549.59		0.837306	1.05301	1.10969	0.732428	0.831173	0.694568	0.544011	0.662382	0.48425	0.450243	0.541262	0.561679	0.618776	0.454925	0.435076	0.454238			1.2908	0.062016	-0.403443		0.857564	0.0461451	-0.291388	+
621	Q7KZN9	COX15	Cytochrome c oxidase assembly protein COX15 homolog OS=Homo sapiens OX=9606 GN=COX15 PE=1 SV=1	3			334.295	414.068	474.793	286.018	244.738	260.434	207.966	225.039	156.357	141.849	171.687	156.707	193.294	83.1981	97.5814	96.9876		0.819916	1.01557	1.16451	0.701508	0.600262	0.638759	0.510072	0.551947	0.383492	0.347909	0.421092	0.384351	0.474087	0.204058	0.239335	0.237879		+	1.72891	0.00312113	-0.616675	+	1.61776	0.00319028	-0.470268	+
622	P13073	COX4I1	Cytochrome c oxidase subunit 4 isoform 1, mitochondrial OS=Homo sapiens OX=9606 GN=COX4I1 PE=1 SV=1	1			54.9819	89.0176	83.9343	75.202	65.9724	71.4921	38.7538	44.6741	36.5033	16.2877	38.4668	40.3863	44.264	14.7139	37.3326	29.43		0.723656	1.17162	1.10472	0.989787	0.86831	0.940959	0.510067	0.587988	0.480446	0.214374	0.506289	0.531553	0.58259	0.19366	0.491361	0.387349			0.113502	0.83565	-0.0706301	+	0.432497	0.00614989	-0.551747	+
623	P20674	COX5A	Cytochrome c oxidase subunit 5A, mitochondrial OS=Homo sapiens OX=9606 GN=COX5A PE=1 SV=2	1			155.294	250.534	161.309	48.7991	45.7511	39.3401	101.016	149.639	41.363	18.3029	26.8707	127.829	109.428	13.4333	20.3633	24.0407		0.821463	1.32526	0.853281	0.258134	0.242011	0.208098	0.534347	0.791549	0.218799	0.0968173	0.142139	0.676181	0.578844	0.0710585	0.107716	0.127169		+	2.99032	0	-2.05299	+	1.67793	0	-2.17115	+
624	P10606	COX5B	Cytochrome c oxidase subunit 5B, mitochondrial OS=Homo sapiens OX=9606 GN=COX5B PE=1 SV=2	1			327.459	577.489	412.166	212.064	221.116	194.463	229.075	263.982	148.492	126.11	165.108	266.79	257.121	115.535	120.23	119.099		0.745856	1.31535	0.938793	0.48302	0.503637	0.44293	0.521766	0.601274	0.338221	0.287242	0.376068	0.607669	0.585646	0.263155	0.273849	0.271273		+	1.87432	0.000217494	-1.03184	+	1.71073	0.000464625	-0.755304	+
625	P14406	COX7A2	Cytochrome c oxidase subunit 7A2, mitochondrial OS=Homo sapiens OX=9606 GN=COX7A2 PE=1 SV=1	2			93.494	160.902	164.552	169.253	137.578	154.126	76.2267	108.462	91.7308	50.935	84.4892	81.9886	72.7294	38.8122	75.4399	95.2755		0.669491	1.15219	1.17832	1.21199	0.985168	1.10366	0.545844	0.776674	0.656865	0.364735	0.60501	0.587103	0.5208	0.277926	0.54021	0.682248			0.252902	0.537225	0.178623		0.312773	0.0858824	-0.309764
626	O14548	COX7A2L	Cytochrome c oxidase subunit 7A-related protein, mitochondrial OS=Homo sapiens OX=9606 GN=COX7A2L PE=1 SV=2	2			206.599	302.912	300.268	277.928	228.429	279.418	148.776	182.456	126.231	101.912	109.623	158.345	146.53	79.2215	92.2936	107.894		0.76539	1.1222	1.11241	1.02964	0.846264	1.03516	0.551173	0.675947	0.46765	0.377555	0.406122	0.586623	0.542852	0.293493	0.341921	0.399716			0.0460904	0.941143	-0.0277003	+	1.39121	0.00155384	-0.555032	+
627	P24311	COX7B	Cytochrome c oxidase subunit 7B, mitochondrial OS=Homo sapiens OX=9606 GN=COX7B PE=1 SV=2	1			1084.45	1625.04	1467.92	1395.4	994.409	1288.77	108.506	72.9361	42.6258	37.2149	31.1932	106.152	93.0315	43.2847	28.0709	32.4887		0.778796	1.16702	1.05418	1.0021	0.714133	0.925528	0.0779234	0.0523789	0.0306116	0.0267258	0.0224013	0.0762329	0.0668104	0.0310848	0.0201591	0.0233317			0.317283	0.522706	-0.177542	+	1.73823	0	-1.27689	+
628	O75976	CPD	Carboxypeptidase D OS=Homo sapiens OX=9606 GN=CPD PE=1 SV=2	8			591.452	733.342	741.602	486.559	459.482	487.137	515.069	523.011	336.359	287.579	340.33	671.905	664.91	354.962	361.923	397.445		0.858672	1.06467	1.07666	0.706388	0.667077	0.707227	0.747779	0.759309	0.488327	0.417508	0.494092	0.975474	0.965318	0.515335	0.525441	0.577012		+	2.04518	0.00686943	-0.520814	+	2.197	0.000431373	-0.695505	+
629	Q99829	CPNE1	Copine-1 OS=Homo sapiens OX=9606 GN=CPNE1 PE=1 SV=1	8			1639.6	1977.35	2158.87	1583.53	1246.21	1307.8	1514.64	1353.38	1105.88	1102.02	1194.39	1383.44	1462.67	839.679	965.273	1069.17		0.851619	1.02705	1.12133	0.822496	0.64729	0.67928	0.786714	0.702955	0.574402	0.572397	0.620374	0.718568	0.759721	0.436135	0.501369	0.555334			1.41747	0.0172985	-0.479785		1.64453	0.013468	-0.337231	+
630	Q96FN4	CPNE2	Copine-2 OS=Homo sapiens OX=9606 GN=CPNE2 PE=1 SV=3	1			29.4796	38.1921	31.4359	34.5664	30.3612	45.1442	33.9944	38.5567	23.5524	22.719	24.5663	41.5399	26.5833	21.0619	18.234	24.7525		0.892351	1.15608	0.951569	1.04633	0.919037	1.36652	1.02901	1.16712	0.712934	0.687707	0.743625	1.25742	0.80468	0.637546	0.551946	0.749261			0.278485	0.617487	0.140245	+	2.34888	0.00118133	-0.617321	+
631	O75131	CPNE3	Copine-3 OS=Homo sapiens OX=9606 GN=CPNE3 PE=1 SV=1	13			3406.86	4835.73	4705.34	2423.91	2372.99	2955.54	1897.14	2863.25	1487.09	1370.71	1704.84	1712.67	1975.13	983.633	901.923	980.387		0.78936	1.12043	1.09021	0.561613	0.549815	0.684791	0.439562	0.663407	0.344555	0.31759	0.395007	0.396821	0.457632	0.227905	0.208973	0.227153		+	1.72608	0.000971389	-0.72967	+	1.04795	0.00129694	-0.621723	+
632	Q9UBL6	CPNE7	Copine-7 OS=Homo sapiens OX=9606 GN=CPNE7 PE=1 SV=1	4			687.696	946.415	966.28	529.532	499.504	655.67	406.267	563.982	322.386	289.853	350.306	410.345	428.621	241.176	221.201	247.066		0.793376	1.09185	1.11477	0.610907	0.576264	0.756429	0.468699	0.650651	0.371928	0.334395	0.404138	0.473404	0.494488	0.278238	0.255194	0.285033		+	1.44908	0.00376043	-0.6195	+	1.18754	0.00149527	-0.581463	+
633	Q86YQ8	CPNE8	Copine-8 OS=Homo sapiens OX=9606 GN=CPNE8 PE=1 SV=2	3			163.42	180.712	186.26	197.06	164.499	191.101	65.7877	71.6936	47.2456	43.4383	47.6885	111.211	108.304	83.4416	70.6181	87.1147		0.924335	1.02214	1.05352	1.11461	0.930438	1.0809	0.372108	0.405513	0.26723	0.245695	0.269735	0.629031	0.612588	0.471962	0.39943	0.492738			0.226616	0.854209	0.0571515	+	2.38767	0.00112895	-0.575568	+
634	P36551	CPOX	Oxygen-dependent coproporphyrinogen-III oxidase, mitochondrial OS=Homo sapiens OX=9606 GN=CPOX PE=1 SV=3	8			1423.98	1841.78	1907.62	1337.39	1294.44	1231.46	946.432	1115.17	847.794	720.529	850.778	1414.33	1420.97	1114.94	1091.93	1150.84		0.825754	1.06803	1.10621	0.775541	0.750635	0.714113	0.548828	0.646678	0.491629	0.417829	0.493359	0.820158	0.824009	0.646544	0.633201	0.667363			1.39234	0.0515321	-0.410228		1.10285	0.013659	-0.353661	+
635	P31327	CPS1	Carbamoyl-phosphate synthase [ammonia], mitochondrial OS=Homo sapiens OX=9606 GN=CPS1 PE=1 SV=2	4			846.426	1060.3	1124.26	603.074	543.185	539.302	596.398	687.503	405.306	376.043	439.719	702.179	670.948	360.645	367.815	400.161		0.837773	1.04946	1.11277	0.596909	0.537632	0.533789	0.590301	0.680475	0.401163	0.372199	0.435224	0.695001	0.664089	0.356958	0.364055	0.39607		+	2.46183	0.000475771	-0.837939	+	1.98661	0.00113576	-0.656657	+
636	Q10570	CPSF1	Cleavage and polyadenylation specificity factor subunit 1 OS=Homo sapiens OX=9606 GN=CPSF1 PE=1 SV=2	11			1214.26	1471.19	1634.25	971.099	967.424	996.555	712.107	724.73	562.344	516.448	624.76	646.893	750.398	445.474	422.97	493.162		0.843295	1.02173	1.13497	0.674421	0.671869	0.6921	0.494553	0.50332	0.390544	0.358669	0.433891	0.449262	0.521146	0.309378	0.29375	0.342497		+	1.90986	0.00543619	-0.546919		1.35165	0.01375	-0.343643	+
637	Q9P2I0	CPSF2	Cleavage and polyadenylation specificity factor subunit 2 OS=Homo sapiens OX=9606 GN=CPSF2 PE=1 SV=2	6			1631.84	2038.73	2048.34	1236.42	1152.65	1192.32	973.741	1123.27	748.315	682.101	829.948	929.752	995.777	548.79	532.362	609.328		0.856023	1.06947	1.07451	0.648596	0.604652	0.625462	0.510801	0.58924	0.392548	0.357813	0.43537	0.487725	0.52236	0.287882	0.279264	0.319639		+	2.4	0.00138039	-0.66791	+	1.45285	0.00318627	-0.477701	+
638	Q9UKF6	CPSF3	Cleavage and polyadenylation specificity factor subunit 3 OS=Homo sapiens OX=9606 GN=CPSF3 PE=1 SV=1	11			1881.66	2341.25	2508.82	1513.12	1330.8	1411.77	1127.74	1315.69	860.675	777.155	941.215	1117.25	1137.8	639.444	603.566	725.224		0.838563	1.04338	1.11806	0.674323	0.593072	0.629156	0.502578	0.586338	0.38356	0.34634	0.419453	0.497903	0.507061	0.284969	0.26898	0.323197		+	2.06302	0.00163441	-0.65299	+	1.50508	0.00208925	-0.507157	+
639	O95639	CPSF4	Cleavage and polyadenylation specificity factor subunit 4 OS=Homo sapiens OX=9606 GN=CPSF4 PE=1 SV=1	5			1264.34	1583.55	1714.54	1058.07	887.469	918.321	883.121	1072.19	794.96	710.057	888.914	635.837	717.307	443.597	397.266	505.134		0.83136	1.04125	1.12739	0.695728	0.58355	0.603837	0.580691	0.705012	0.522721	0.466894	0.5845	0.418091	0.471661	0.291685	0.26122	0.332148		+	1.91444	0.00165217	-0.664365		0.783959	0.0482849	-0.292263	+
640	Q8N684	CPSF7	Cleavage and polyadenylation specificity factor subunit 7 OS=Homo sapiens OX=9606 GN=CPSF7 PE=1 SV=1	3			530.736	652.654	684.418	489.739	455.107	454.363	351.504	399.179	301.892	275.799	320.14	404.033	410.495	306.437	295.674	338.11		0.852447	1.04827	1.09929	0.7866	0.730975	0.72978	0.564572	0.641146	0.484887	0.442978	0.514196	0.648942	0.659321	0.492187	0.4749	0.543059			1.58908	0.0461259	-0.409042		1.26834	0.0192903	-0.326504	+
641	P50416	CPT1A	Carnitine O-palmitoyltransferase 1, liver isoform OS=Homo sapiens OX=9606 GN=CPT1A PE=1 SV=2	9			1412.96	1627.12	1767.07	1121.74	966.946	1074.6	997.939	1013.79	685.018	624.782	822.915	877.817	890.572	483.878	519.901	566.129		0.881787	1.01544	1.10278	0.700045	0.603442	0.670626	0.622784	0.632676	0.427499	0.389908	0.513557	0.54782	0.55578	0.301974	0.324455	0.353304		+	2.21019	0.00266795	-0.600452	+	1.36511	0.00229133	-0.51024	+
642	Q92793	CREBBP	CREB-binding protein OS=Homo sapiens OX=9606 GN=CREBBP PE=1 SV=3	6			1209.84	1964.08	1502.65	869.787	842.378	840.146	858.997	941.939	581.523	540.463	665.305	834.031	799.452	405.433	433.197	447.778		0.776107	1.25995	0.963944	0.557965	0.540382	0.53895	0.551043	0.60425	0.373045	0.346705	0.42679	0.535027	0.512845	0.260084	0.277894	0.287248		+	1.85238	0.000392252	-0.845398	+	1.77614	0.0011071	-0.599794	+
643	Q8IUI8	CRLF3	Cytokine receptor-like factor 3 OS=Homo sapiens OX=9606 GN=CRLF3 PE=1 SV=2	1			173.825	193.229	209.387	130.87	117.286	111.446	136.511	157.41	96.7832	84.1493	93.4212	124.788	143.504	74.4261	80.8036	78.6724		0.904646	1.00563	1.08972	0.681093	0.610397	0.580004	0.710451	0.819217	0.503694	0.437942	0.486197	0.64944	0.746845	0.387339	0.42053	0.409439		+	2.55534	0.000901849	-0.67987	+	2.08109	0.000583486	-0.683214	+
644	Q9BZJ0	CRNKL1	Crooked neck-like protein 1 OS=Homo sapiens OX=9606 GN=CRNKL1 PE=1 SV=4	8			772.708	1043.03	1072.09	730.394	629.979	629.598	611.679	730.552	459.346	460.395	505.38	423.75	513.603	294.851	295.943	323.377		0.802722	1.08354	1.11373	0.758765	0.654449	0.654053	0.635438	0.758929	0.477188	0.478278	0.52501	0.44021	0.533553	0.306304	0.307438	0.335938		+	1.45874	0.00955474	-0.525526	+	1.66542	0.00222442	-0.494274	+
645	O75718	CRTAP	Cartilage-associated protein OS=Homo sapiens OX=9606 GN=CRTAP PE=1 SV=1	2			299.073	367.043	405.909	242.205	223.49	225.434	232.14	253.498	172.103	142.243	169.206	227.409	243.495	154.623	142.878	155.875		0.836939	1.02715	1.13591	0.677797	0.625424	0.630864	0.64963	0.7094	0.48162	0.398059	0.473513	0.636391	0.681407	0.432704	0.399836	0.436207		+	2.00573	0.00235482	-0.62282	+	1.77463	0.00108814	-0.595015	+
646	Q16526	CRY1	Cryptochrome-1 OS=Homo sapiens OX=9606 GN=CRY1 PE=1 SV=1	1			187.371	269.98	249.985	146.771	134.753	137.064	150.047	157.268	96.5876	101.887	126.254	111.591	133.414	67.2709	74.4109	82.7045		0.79469	1.14506	1.06025	0.622495	0.571523	0.581325	0.636389	0.667015	0.409654	0.43213	0.535477	0.473287	0.565844	0.285314	0.315596	0.350772		+	1.96417	0.000572352	-0.740619	+	1.35029	0.00223848	-0.514917	+
647	Q68DQ2	CRYBG3	Very large A-kinase anchor protein OS=Homo sapiens OX=9606 GN=CRYBG3 PE=1 SV=3	6			953.946	1217.41	1347.94	753.909	669.925	716.531	734.861	827.545	497.413	444.654	591.341	862.557	809.568	467.199	472.628	506.624		0.813185	1.03777	1.14904	0.642665	0.571073	0.610802	0.626427	0.705435	0.424016	0.379042	0.504085	0.735281	0.690111	0.398261	0.402889	0.431868		+	1.97068	0.00116314	-0.704305	+	1.46692	0.0010923	-0.619449	+
648	Q08257	CRYZ	Quinone oxidoreductase OS=Homo sapiens OX=9606 GN=CRYZ PE=1 SV=1	1			237.504	296.369	303.238	192.421	204.742	197.908	135.795	145.159	107.19	103.14	118.286	239.719	235.828	178.037	184.601	190.17		0.851156	1.06211	1.08673	0.68959	0.733745	0.709254	0.486656	0.520214	0.384143	0.369628	0.423908	0.859094	0.84515	0.638041	0.661565	0.681523			1.86304	0.0119563	-0.484298	+	1.63316	0.00900973	-0.360514	+
649	O75390	CS	Citrate synthase, mitochondrial OS=Homo sapiens OX=9606 GN=CS PE=1 SV=2	7			2586.03	2919.17	2919.29	2191.33	2088.77	2088.77	1446.51	1475.51	1188.91	1075.7	1174.93	1903.1	1878.19	1499.8	1512.25	1500.4		0.920897	1.03953	1.03957	0.780343	0.743821	0.743821	0.515109	0.525436	0.423376	0.383062	0.418398	0.677703	0.668832	0.534086	0.538519	0.534299			2.51605	0.0358662	-0.4016	+	2.00704	0.00927534	-0.351065	+
650	O75534	CSDE1	Cold shock domain-containing protein E1 OS=Homo sapiens OX=9606 GN=CSDE1 PE=1 SV=2	15			3544.56	4388	4671.14	2700.77	2386.01	2555.02	1861.63	2117.53	1353.62	1284.91	1552.17	1739.6	1840.16	995.392	1029.5	1102.45		0.843695	1.04446	1.11185	0.642852	0.567931	0.60816	0.443115	0.504026	0.322196	0.305841	0.369456	0.414069	0.438005	0.236929	0.245047	0.262411		+	2.25713	0.000627451	-0.71388	+	1.57274	0.00181376	-0.511882	+
651	P55060	CSE1L	Exportin-2 OS=Homo sapiens OX=9606 GN=CSE1L PE=1 SV=3	13			3236.98	4054.4	4056.21	2859.6	2467.1	2641.95	1639.72	1868.9	1323.65	1176.78	1455.13	1675.21	1860.28	1095.72	1171.25	1240.65		0.855771	1.07188	1.07235	0.756002	0.652235	0.698461	0.433498	0.494087	0.349938	0.311109	0.384698	0.442881	0.491808	0.289679	0.309647	0.327995		+	1.81002	0.00975036	-0.504679	+	1.26843	0.00583741	-0.414315	+
652	P41240	CSK	Tyrosine-protein kinase CSK OS=Homo sapiens OX=9606 GN=CSK PE=1 SV=1	2			313.266	378.411	391.361	214.36	190.84	183.247	194.397	218.979	133.063	128.973	162.243	186.34	200.944	119.424	108.515	126.604		0.867742	1.04819	1.08406	0.593774	0.528624	0.507592	0.538477	0.606569	0.368583	0.357253	0.449411	0.516159	0.556612	0.330803	0.300585	0.350691		+	2.71831	0.000173258	-0.876551	+	1.47206	0.00148357	-0.552454	+
653	P48729	CSNK1A1	Casein kinase I isoform alpha OS=Homo sapiens OX=9606 GN=CSNK1A1 PE=1 SV=2	4			554.018	723.458	782.9	490.381	466.846	478.336	366.99	423.122	294.506	283.769	327.187	451.637	455.856	314.786	329.352	316.215		0.806675	1.05339	1.13994	0.714017	0.679749	0.696479	0.534354	0.616085	0.428814	0.41318	0.476399	0.657604	0.663747	0.458343	0.479551	0.460423			1.53345	0.0109465	-0.506265	+	1.40752	0.00767367	-0.387364	+
654	P49674	CSNK1E	Casein kinase I isoform epsilon OS=Homo sapiens OX=9606 GN=CSNK1E PE=1 SV=1	1			289.164	374.661	358.06	220.74	195.073	206.862	232.319	251.495	163.402	144.942	157.703	259.339	268.115	160.713	161.567	170.47		0.848914	1.09991	1.05118	0.648038	0.572686	0.607295	0.682031	0.738327	0.479708	0.425514	0.462977	0.761355	0.787119	0.471813	0.47432	0.500457		+	2.30341	0.000619195	-0.707548	+	2.40859	0.00101266	-0.639615	+
655	Q9Y6M4	CSNK1G3	Casein kinase I isoform gamma-3 OS=Homo sapiens OX=9606 GN=CSNK1G3 PE=1 SV=2	2			125.815	158.369	197.383	136.347	89.5216	122.68	104.454	131.838	96.2849	70.0396	88.5669	145.165	170.284	126.103	138.44	160.261		0.783785	0.986585	1.22963	0.849396	0.557689	0.764255	0.650713	0.821306	0.599822	0.436323	0.551742	0.904329	1.06081	0.785579	0.862435	0.998372			0.822445	0.0438985	-0.464367	+	0.940427	0.00399233	-0.478662
656	P68400	CSNK2A1	Casein kinase II subunit alpha OS=Homo sapiens OX=9606 GN=CSNK2A1 PE=1 SV=1	7			4382.25	5603	5534.15	3494.61	3031.06	3123.13	1837.67	2438.26	1700.64	1496.4	1775.42	2145.35	2401.12	2169.63	1517.78	1662.53		0.847117	1.0831	1.06979	0.675531	0.585923	0.603721	0.355233	0.471331	0.328745	0.289264	0.3432	0.41471	0.464152	0.419403	0.293397	0.321378		+	2.18004	0.00138129	-0.679429		0.849836	0.0168268	-0.35662
657	P19784	CSNK2A2	Casein kinase II subunit alpha' OS=Homo sapiens OX=9606 GN=CSNK2A2 PE=1 SV=1	2			406.838	528.249	549.759	329.583	308.937	292.47	192.199	261.17	170.27	153.123	166.586	232.67	254.878	200.704	157.941	169.277		0.82198	1.06728	1.11074	0.665893	0.62418	0.59091	0.388321	0.527671	0.344015	0.309371	0.336572	0.470089	0.514958	0.405505	0.319106	0.342009		+	1.98877	0.00161855	-0.662743	+	1.0973	0.00409708	-0.457534	+
658	P67870	CSNK2B	Casein kinase II subunit beta OS=Homo sapiens OX=9606 GN=CSNK2B PE=1 SV=1	6			999.093	1377.37	1436.04	800.717	752.449	726.057	518.327	662.625	436.755	402.165	459.81	609.989	665.846	522.984	388.567	453.309		0.786171	1.08383	1.13	0.630072	0.592091	0.571323	0.407864	0.521409	0.343676	0.316457	0.361817	0.479991	0.523944	0.411528	0.305757	0.356702		+	1.88259	0.000833212	-0.725173	+	1.2089	0.00458358	-0.439144	+
659	Q1MSJ5	CSPP1	Centrosome and spindle pole-associated protein 1 OS=Homo sapiens OX=9606 GN=CSPP1 PE=1 SV=4	1			259.855	341.864	351.57	248.012	199.1	206.664	171.054	207.53	150.122	133.538	152.992	187.601	179.366	115.931	104.813	123.19		0.817764	1.07585	1.10639	0.780494	0.626568	0.650372	0.538307	0.653097	0.472434	0.420244	0.481466	0.59038	0.564465	0.364835	0.329846	0.387679		+	1.46696	0.00825337	-0.537917	+	1.19322	0.00916142	-0.374938	+
660	P04080	CSTB	Cystatin-B OS=Homo sapiens OX=9606 GN=CSTB PE=1 SV=2	1			449.245	517.626	477.373	243.004	482.313	224.561	238.187	304.923	170.597	132.968	180.364	418.653	403.527	280.464	224.818	266.412		0.933177	1.07522	0.991605	0.504771	1.00187	0.466461	0.494765	0.63339	0.354366	0.276203	0.374654	0.869631	0.838211	0.582583	0.466994	0.553394		+	0.909683	0.00395656	-0.692158	+	1.3821	0.000589981	-0.752742	+
661	Q05048	CSTF1	Cleavage stimulation factor subunit 1 OS=Homo sapiens OX=9606 GN=CSTF1 PE=1 SV=1	4			206.531	268.419	264.288	154.698	135.598	115.58	302.033	346.504	227.097	238.754	246.077	186.367	237.093	138.973	106.832	123.43		0.838151	1.08931	1.07254	0.627801	0.550288	0.469051	1.22572	1.40619	0.921613	0.968919	0.998638	0.756321	0.962179	0.563985	0.433549	0.500908		+	2.12931	0.000475073	-0.865091	+	1.86453	0.00335714	-0.447808	+
662	Q9H0L4	CSTF2T	Cleavage stimulation factor subunit 2 tau variant OS=Homo sapiens OX=9606 GN=CSTF2T PE=1 SV=1	2			162.474	195.544	190.402	69.7552	50.9572	60.2826	98.3923	125.449	51.1362	41.5474	47.4935	128.62	122.407	50.0013	53.4642	49.4105		0.888775	1.06968	1.04155	0.381579	0.278749	0.329761	0.538231	0.686239	0.279728	0.227275	0.259802	0.703585	0.669598	0.27352	0.292463	0.270288		+	3.30813	0	-1.6064	+	2.2683	0	-1.25484	+
663	Q12996	CSTF3	Cleavage stimulation factor subunit 3 OS=Homo sapiens OX=9606 GN=CSTF3 PE=1 SV=1	2			491.911	627.066	609.461	523.459	443.626	510.773	389.782	409.425	334.616	252.761	308.47	395.286	409.577	283.709	274.873	330.427		0.853796	1.08838	1.05782	0.908553	0.769989	0.886534	0.676533	0.710627	0.580783	0.43871	0.535402	0.686087	0.710891	0.492426	0.477089	0.573513			0.765067	0.397334	-0.221482	+	1.14268	0.00537034	-0.429663	+
664	Q13363	CTBP1	C-terminal-binding protein 1 OS=Homo sapiens OX=9606 GN=CTBP1 PE=1 SV=2	7			1472.19	1847.41	1903.39	921.342	799.137	743.999	932.137	1161.95	633.037	519.573	688.858	963.856	1035.49	477.822	458.797	463.926		0.845602	1.06112	1.09328	0.529204	0.459011	0.427341	0.535404	0.667405	0.363606	0.298434	0.395669	0.553623	0.594769	0.274453	0.263525	0.266472		+	2.7269	0	-1.08011	+	1.53684	0.00045738	-0.771568	+
665	P56545	CTBP2	C-terminal-binding protein 2 OS=Homo sapiens OX=9606 GN=CTBP2 PE=1 SV=1	14			1749.31	2129.93	2282.62	1312.36	1172.93	1172.91	1094.77	1273.02	756.512	700.386	863.227	1101.7	1166.85	555.385	575.238	596.766		0.85168	1.03699	1.11133	0.638943	0.57106	0.57105	0.533006	0.61979	0.36832	0.340994	0.420276	0.53638	0.5681	0.270398	0.280064	0.290545		+	2.37505	0.000672365	-0.745303	+	1.6645	0.00115013	-0.615618	+
666	P49711	CTCF	Transcriptional repressor CTCF OS=Homo sapiens OX=9606 GN=CTCF PE=1 SV=1	7			1969.73	2266.08	1980.32	1027.54	918.497	942.39	1502.05	1471.84	797.204	699.406	752.505	1540.31	1442.89	681.735	616.268	647.171		0.950622	1.09365	0.955733	0.495907	0.443281	0.454812	0.724912	0.710333	0.384743	0.337544	0.36317	0.743377	0.696361	0.329016	0.29742	0.312335		+	3.74867	0	-1.10433	+	3.09082	0	-0.989945	+
667	P35221	CTNNA1	Catenin alpha-1 OS=Homo sapiens OX=9606 GN=CTNNA1 PE=1 SV=1	18			3368.91	4535.73	4466.5	2872.01	2595.57	2772.17	2315.99	2687.75	1637.31	1403.06	1651.09	2901.48	2854.57	1567.25	1649.89	1674.71		0.81696	1.09991	1.08313	0.696462	0.629425	0.672251	0.561627	0.651779	0.397047	0.340242	0.400389	0.703609	0.692233	0.380058	0.400098	0.406117		+	1.77002	0.00445343	-0.574544	+	1.89126	0.000552563	-0.677906	+
668	P35222	CTNNB1	Catenin beta-1 OS=Homo sapiens OX=9606 GN=CTNNB1 PE=1 SV=1	10			2493.77	3404.32	3344.81	2062.3	1875.04	1992.38	1576.78	1902.13	1194.45	1065.14	1237.04	1716.35	1816.08	1029.84	1026.39	1108.91		0.809412	1.10495	1.08564	0.669368	0.608588	0.646674	0.511781	0.617381	0.387687	0.345716	0.40151	0.557082	0.589451	0.334259	0.333139	0.359923		+	1.84689	0.00237992	-0.627317	+	1.65473	0.00118208	-0.574205	+
669	Q8WYA6	CTNNBL1	Beta-catenin-like protein 1 OS=Homo sapiens OX=9606 GN=CTNNBL1 PE=1 SV=1	7			636.936	827.356	868.72	535.721	469.242	583.726	472.893	472.598	327.252	286.943	345.734	353.513	369.061	175.686	209.881	218.907		0.819031	1.06389	1.11708	0.688879	0.603394	0.750608	0.608089	0.60771	0.420811	0.368978	0.444576	0.454579	0.474572	0.225913	0.269884	0.281491		+	1.51835	0.00690909	-0.547148	+	1.9292	0.00101961	-0.567454	+
670	O60716	CTNND1	Catenin delta-1 OS=Homo sapiens OX=9606 GN=CTNND1 PE=1 SV=1	11			2275.13	3008.75	3173.69	1957.21	1879.27	1937.67	1173.82	1347.74	920.603	874.484	1083.16	1269.75	1300.39	724.867	807.029	892.348		0.807015	1.06724	1.12575	0.694246	0.666599	0.687314	0.416368	0.478059	0.326549	0.31019	0.38421	0.450395	0.461264	0.257119	0.286263	0.316526		+	1.63301	0.00727605	-0.535994	+	1.17165	0.00771429	-0.396743	+
671	P17812	CTPS1	CTP synthase 1 OS=Homo sapiens OX=9606 GN=CTPS1 PE=1 SV=2	10			1220.56	1464.57	1568.76	982.106	836.048	790.978	810.456	1004.87	613.719	576.365	704.963	689.179	749.168	381.021	342.389	370.9		0.860784	1.03287	1.10635	0.692617	0.589612	0.557827	0.571563	0.708671	0.432817	0.406474	0.497166	0.486034	0.528341	0.26871	0.241465	0.261572		+	2.10085	0.000897381	-0.703442	+	1.32206	0.00209021	-0.519799	+
672	Q9NRF8	CTPS2	CTP synthase 2 OS=Homo sapiens OX=9606 GN=CTPS2 PE=1 SV=1	6			1189.58	1488.58	1568.15	927.712	791.017	770.918	806.671	924.65	585.413	553.475	676.632	819.378	815.184	424.05	422.133	494.802		0.840433	1.05168	1.10789	0.655425	0.55885	0.54465	0.56991	0.653261	0.413592	0.391028	0.478038	0.578887	0.575924	0.29959	0.298235	0.349576		+	2.17591	0.000693438	-0.765091	+	1.51927	0.00175379	-0.518329	+
673	Q6PD62	CTR9	RNA polymerase-associated protein CTR9 homolog OS=Homo sapiens OX=9606 GN=CTR9 PE=1 SV=1	10			2561	3104.15	3090.36	2137.59	1914.98	2009.65	1686.44	1859.99	1246.17	1178.85	1430.71	1602.14	1558.79	1055.68	969.691	1041.66		0.877505	1.06361	1.05889	0.732427	0.656151	0.688589	0.577844	0.63731	0.426989	0.403923	0.49022	0.548959	0.534106	0.36172	0.332256	0.356916		+	2.16861	0.00605989	-0.526141	+	1.52783	0.00321122	-0.467434	+
674	P07858	CTSB	Cathepsin B OS=Homo sapiens OX=9606 GN=CTSB PE=1 SV=3	1			193.371	197.868	235.749	173.559	173.174	169.208	200.788	193.563	154.108	129.988	152.173	214.08	226.023	154.5	122.029	153.505		0.925238	0.946755	1.12801	0.830442	0.8286	0.809623	0.960727	0.926156	0.737373	0.621964	0.728114	1.02433	1.08147	0.739249	0.583882	0.734488			1.4102	0.270223	-0.275572	+	1.62684	0.00350452	-0.443227	+
675	Q14247	CTTN	Src substrate cortactin OS=Homo sapiens OX=9606 GN=CTTN PE=1 SV=2	1			15.4965	22.4389	22.582	16.6324	17.1014	12.138	14.9379	16.0314	13.05	8.39174	12.6481	22.246	16.0729	11.1354	10.963	10.5443		0.768201	1.11235	1.11945	0.82451	0.847759	0.601711	0.740509	0.794717	0.646921	0.416	0.626998	1.10279	0.796774	0.55201	0.543464	0.522708			0.758421	0.11371	-0.395159	+	0.7565	0.00534167	-0.473268	+
676	Q7Z7A3	CTU1	Cytoplasmic tRNA 2-thiolation protein 1 OS=Homo sapiens OX=9606 GN=CTU1 PE=1 SV=1	2			1601.63	2027.84	2093.27	1384.62	1176.58	1199.61	579.757	605.16	409.601	402.219	452.349	530.005	566.92	306.355	337.563	358.682		0.839614	1.06304	1.09734	0.725852	0.616792	0.628865	0.303923	0.31724	0.214723	0.210853	0.237132	0.277842	0.297193	0.160599	0.176959	0.18803		+	1.86514	0.00332844	-0.599529	+	2.19956	0.0017748	-0.49317	+
677	Q2VPK5	CTU2	Cytoplasmic tRNA 2-thiolation protein 2 OS=Homo sapiens OX=9606 GN=CTU2 PE=1 SV=1	2			90.6497	123.215	128.901	71.9705	67.4208	64.0391	45.0711	54.453	35.3309	27.8651	36.0523	48.9492	46.6654	32.0821	25.543	30.2453		0.793396	1.07842	1.12818	0.62991	0.590089	0.560492	0.394477	0.476591	0.309228	0.243885	0.315542	0.42842	0.408431	0.280793	0.223561	0.264717		+	1.93874	0.000631912	-0.737349	+	1.30959	0.00131155	-0.592113	+
678	Q13616	CUL1	Cullin-1 OS=Homo sapiens OX=9606 GN=CUL1 PE=1 SV=2	11			2066.94	2538.04	2606.3	1605.35	1407.83	1484.28	1537.16	1666.19	1016.2	910.815	1067.07	1683.3	1655.62	895.47	887.269	972.976		0.859878	1.05586	1.08426	0.66785	0.585678	0.617483	0.639481	0.69316	0.422754	0.378913	0.443917	0.700278	0.688763	0.372529	0.369117	0.404773		+	2.32136	0.00132357	-0.675697	+	2.22804	0.00059887	-0.684387	+
679	Q13617	CUL2	Cullin-2 OS=Homo sapiens OX=9606 GN=CUL2 PE=1 SV=2	2			350.565	444.45	500.937	325.528	295.449	297.878	248.639	277.925	209.821	190.002	230.423	292.398	308.81	190.291	211.067	199.816		0.811523	1.02886	1.15962	0.753565	0.683935	0.689558	0.575575	0.643369	0.485715	0.439836	0.533406	0.676872	0.714864	0.440505	0.488599	0.462554			1.42166	0.0166219	-0.481973		1.14592	0.0201108	-0.327888	+
680	Q13618	CUL3	Cullin-3 OS=Homo sapiens OX=9606 GN=CUL3 PE=1 SV=2	11			3456.75	5184.27	4776.55	3289.68	2969.9	3134.99	2508.86	2915.25	2016.65	1755.21	2015.57	3443.35	3577.41	2420.22	2440.53	2480.15		0.772886	1.15914	1.06798	0.735531	0.664032	0.700944	0.56095	0.651813	0.450898	0.392443	0.450656	0.76989	0.799864	0.541131	0.545672	0.55453			1.26374	0.0163238	-0.494235	+	1.59663	0.00240527	-0.490395	+
681	Q13619	CUL4A	Cullin-4A OS=Homo sapiens OX=9606 GN=CUL4A PE=1 SV=3	3			701.701	890.374	944.025	542.225	466.963	476.509	429.726	471.622	263.774	252.21	300.026	475.563	450.581	239.405	269.4	237.089		0.830055	1.05324	1.1167	0.641408	0.552379	0.563671	0.508331	0.55789	0.312023	0.298344	0.354906	0.562552	0.533001	0.283197	0.318678	0.280457		+	2.18061	0.000689387	-0.76313	+	2.16881	0.000489433	-0.730852	+
682	Q13620	CUL4B	Cullin-4B OS=Homo sapiens OX=9606 GN=CUL4B PE=1 SV=4	5			1553.67	2009.65	2035.42	1376.5	1187.17	1190.8	1417.96	1653.06	1119.34	951.23	1133.77	1594.46	1678.72	1090.77	1109.13	1079.5		0.832511	1.07684	1.09065	0.737577	0.636127	0.638072	0.759792	0.885767	0.599781	0.509702	0.607513	0.854367	0.899517	0.584473	0.594311	0.578434		+	1.76358	0.00478871	-0.569163	+	1.52936	0.00179024	-0.52393	+
683	Q93034	CUL5	Cullin-5 OS=Homo sapiens OX=9606 GN=CUL5 PE=1 SV=4	3			491.87	627.304	661.132	437.598	391.029	383.025	385.847	494.02	324.814	305.737	376.641	429.352	451.381	288.76	274.256	314.642		0.828852	1.05707	1.11408	0.737398	0.658924	0.645437	0.650192	0.832475	0.547345	0.515199	0.634679	0.723503	0.760624	0.486591	0.46215	0.530204		+	1.71236	0.00610634	-0.54602	+	0.932756	0.00990804	-0.384601	+
684	Q8IWT3	CUL9	Cullin-9 OS=Homo sapiens OX=9606 GN=CUL9 PE=1 SV=2	4			344.281	426.902	460.299	269.462	280.14	281.94	280.807	351.779	270.544	236.737	318.283	402.012	421.316	262.876	301.463	306.54		0.838699	1.03997	1.12133	0.656433	0.682446	0.686831	0.684071	0.856965	0.659069	0.576712	0.775366	0.979337	1.02636	0.640389	0.734391	0.746759		+	1.92296	0.00483821	-0.556148		0.412617	0.2041	-0.202305	+
685	P39880	CUX1	Homeobox protein cut-like 1 OS=Homo sapiens OX=9606 GN=CUX1 PE=1 SV=3	4			704.544	902.944	1074.27	709.789	585.917	640.011	536.347	562.086	452.984	370.374	446.387	570.507	606.731	348.121	326.417	459.407		0.788152	1.0101	1.20175	0.794019	0.655447	0.715961	0.599995	0.628788	0.506739	0.414326	0.499359	0.638209	0.678731	0.389432	0.365153	0.513924			1.09996	0.0345507	-0.453476	+	1.27095	0.00814257	-0.381399	+
686	Q9HCG8	CWC22	Pre-mRNA-splicing factor CWC22 homolog OS=Homo sapiens OX=9606 GN=CWC22 PE=1 SV=3	2			59.7006	101.629	101.433	63.8162	62.4033	56.1279	41.4623	53.7066	43.2914	34.518	42.6362	41.3518	41.014	29.9629	27.495	28.4941		0.681611	1.16031	1.15808	0.728599	0.712468	0.640821	0.473381	0.613176	0.494264	0.394097	0.486784	0.47212	0.468263	0.342091	0.313915	0.325321			0.865832	0.030958	-0.487059		0.516648	0.124137	-0.240614	+
687	Q69YN2	CWF19L1	CWF19-like protein 1 OS=Homo sapiens OX=9606 GN=CWF19L1 PE=1 SV=2	1			99.4647	140.283	160.524	95.3714	76.5847	73.2262	91.8746	95.3074	52.0739	45.6019	62.0374	80.2678	97.3607	44.1339	43.2922	47.125		0.745479	1.05141	1.20311	0.7148	0.573995	0.548824	0.688592	0.71432	0.390289	0.341782	0.464965	0.6016	0.72971	0.33078	0.324471	0.353198		+	1.35841	0.00203621	-0.688732	+	1.7974	0.000165333	-0.825196	+
688	O43169	CYB5B	Cytochrome b5 type B OS=Homo sapiens OX=9606 GN=CYB5B PE=1 SV=2	3			60.5968	90.1683	148.264	75.5914	56.7096	58.946	51.3526	64.8969	44.0389	30.2916	40.727	60.8403	68.4619	28.5972	37.0236	38.9451		0.607935	0.904611	1.48745	0.758368	0.568937	0.591374	0.515193	0.651076	0.441819	0.3039	0.408592	0.610378	0.686842	0.286901	0.371438	0.390715			0.639351	0.0215934	-0.56025	+	1.0432	0.00143041	-0.608066	+
689	P00387	CYB5R3	NADH-cytochrome b5 reductase 3 OS=Homo sapiens OX=9606 GN=CYB5R3 PE=1 SV=3	5			488.823	665.694	644.849	524.724	462.89	514.317	622.708	694.714	522.832	439.71	523.685	630.696	619.274	360.581	443.585	492.864		0.814992	1.10988	1.07513	0.874848	0.771755	0.857497	1.03821	1.15826	0.871694	0.733108	0.873116	1.05153	1.03249	0.60118	0.739569	0.821729			0.752954	0.354359	-0.249416	+	1.36018	0.00563043	-0.413621	+
690	P13498	CYBA	Cytochrome b-245 light chain OS=Homo sapiens OX=9606 GN=CYBA PE=1 SV=3	2			183.158	220.604	242.882	146.327	128.026	130.005	161.111	153.709	90.8895	85.9079	98.4691	200.472	204.739	97.4727	113.303	115.145		0.849732	1.02346	1.12681	0.67886	0.593956	0.603137	0.747448	0.713108	0.421667	0.398556	0.456831	0.930057	0.949853	0.452209	0.525651	0.534197		+	2.12447	0.00154607	-0.670201	+	2.67351	0.000176387	-0.780531	+
691	P08574	CYC1	Cytochrome c1, heme protein, mitochondrial OS=Homo sapiens OX=9606 GN=CYC1 PE=1 SV=3	1			60.0641	78.0818	85.4491	65.4842	52.7072	63.1461	27.8522	26.7633	19.6723	27.8323	21.9306	24.9682	21.9951	10.6919	13.0687	16.6979		0.805887	1.04763	1.14648	0.878609	0.707179	0.847239	0.373696	0.359086	0.263946	0.373429	0.294245	0.335001	0.295111	0.143454	0.175344	0.224038			0.744009	0.282174	-0.292905		0.555682	0.102551	-0.253733	+
692	Q7L576	CYFIP1	Cytoplasmic FMR1-interacting protein 1 OS=Homo sapiens OX=9606 GN=CYFIP1 PE=1 SV=1	20			5059.39	6400.87	6637.74	4080.37	3746.6	3772.22	3391.35	3842.56	2613.86	2449.47	3050.18	3511.96	3608.62	2013	2115.54	2336.13		0.838666	1.06103	1.1003	0.676379	0.621052	0.625299	0.562164	0.636959	0.433284	0.406034	0.505611	0.582157	0.59818	0.333683	0.350681	0.387247		+	2.09639	0.00197364	-0.632743	+	1.25702	0.00537231	-0.422782	+
693	Q16850	CYP51A1	Lanosterol 14-alpha demethylase OS=Homo sapiens OX=9606 GN=CYP51A1 PE=1 SV=3	7			2202.46	2879.54	2924.75	1765.57	1538.24	1668.52	1244.77	1264.02	746.462	662.099	803.899	1293.21	1366.03	692.267	772.756	754.451		0.825226	1.07892	1.09586	0.661531	0.576354	0.625168	0.466395	0.473608	0.279687	0.248078	0.301208	0.484545	0.511829	0.259381	0.289539	0.282681		+	2.0248	0.00155666	-0.677761	+	2.27472	0.000561224	-0.770834	+
694	O00622	CYR61	Protein CYR61 OS=Homo sapiens OX=9606 GN=CYR61 PE=1 SV=1	1			152.343	203.849	179.981	97.4532	90.7712	82.9405	120.834	127.15	76.547	56.1814	60.2326	160.903	175.005	69.7021	69.2207	64.8999		0.852391	1.14058	1.00703	0.545271	0.507884	0.464069	0.676091	0.711431	0.428296	0.314347	0.337014	0.900286	0.97919	0.389998	0.387304	0.363129		+	2.66387	0.000247978	-0.976477	+	1.91196	0.00023619	-0.959379	+
695	Q5VWQ8	DAB2IP	Disabled homolog 2-interacting protein OS=Homo sapiens OX=9606 GN=DAB2IP PE=1 SV=2	1			61.1208	80.6036	90.3272	61.2323	45.8486	44.7624	64.8491	60.0167	37.1188	37.6975	45.5812	67.5315	60.1807	28.9736	33.2248	35.2022		0.790179	1.04206	1.16776	0.791621	0.592738	0.578695	0.838379	0.775905	0.479878	0.487359	0.589281	0.873058	0.778026	0.374575	0.429535	0.4551		+	1.28678	0.00472833	-0.60807	+	1.80105	0.00116353	-0.642873	+
696	P61803	DAD1	Dolichyl-diphosphooligosaccharide--protein glycosyltransferase subunit DAD1 OS=Homo sapiens OX=9606 GN=DAD1 PE=1 SV=3	9			704.401	1000.25	1004.66	925.24	851.009	985.621	607.657	589.679	427.108	350.918	445.419	1091.82	921.728	393.321	633.594	709.14		0.779978	1.10757	1.11245	1.02451	0.942316	1.09137	0.672854	0.652947	0.472934	0.388569	0.493209	1.20896	1.02062	0.435521	0.701574	0.785225			0.087034	0.900182	0.0442379	+	1.57307	0.00137589	-0.561294	+
697	Q14118	DAG1	Dystroglycan OS=Homo sapiens OX=9606 GN=DAG1 PE=1 SV=2	2			437.154	598.939	642.499	524.313	446.61	533.765	319.372	379.777	245.569	240.05	236.681	391.359	392.485	254.261	272.09	270.771		0.781287	1.07043	1.14828	0.937059	0.798187	0.953951	0.570786	0.678742	0.438884	0.42902	0.422999	0.699442	0.701454	0.454418	0.486283	0.483925			0.307494	0.604699	-0.142865	+	1.94716	0.00142203	-0.532726	+
698	P51398	DAP3	28S ribosomal protein S29, mitochondrial OS=Homo sapiens OX=9606 GN=DAP3 PE=1 SV=1	10			2555.87	3139.67	1723.69	2002.64	1918.66	1794.77	1482.58	1835.81	1302.02	1219.72	1375.16	1392.49	1562.67	877.567	796.895	914.364		1.03348	1.26954	0.696982	0.809777	0.775819	0.725724	0.599488	0.742318	0.526478	0.493199	0.556052	0.56306	0.631873	0.354848	0.322228	0.369727			0.578085	0.236702	-0.334709		1.10607	0.0152868	-0.34663	+
699	P14868	DARS	Aspartate--tRNA ligase, cytoplasmic OS=Homo sapiens OX=9606 GN=DARS PE=1 SV=2	12			1672.52	2058.27	2117.88	1289.01	1332.86	1510.93	1864.12	2261.49	1416.74	1329.51	1449.84	1221.79	1300.1	795.966	820.966	952.933		0.857898	1.05576	1.08634	0.661181	0.683673	0.775012	0.956176	1.16	0.726699	0.681955	0.743677	0.626701	0.66687	0.408281	0.421104	0.488795			1.74847	0.0109817	-0.496617	+	1.7748	0.00130056	-0.554763	+
700	Q6PI48	DARS2	Aspartate--tRNA ligase, mitochondrial OS=Homo sapiens OX=9606 GN=DARS2 PE=1 SV=1	2			199.53	265.018	257.938	144.645	117.777	139.815	198.218	191.816	127.732	135.246	138.601	168.761	167.456	85.0031	87.8176	94.5162		0.828514	1.10044	1.07104	0.600614	0.489049	0.580558	0.823066	0.796483	0.530385	0.561586	0.575517	0.700751	0.695333	0.352961	0.364648	0.392462		+	2.20423	0.000441417	-0.839209	+	2.81999	0.00103686	-0.543524	+
701	Q9UER7	DAXX	Death domain-associated protein 6 OS=Homo sapiens OX=9606 GN=DAXX PE=1 SV=2	4			511.907	643.419	663.854	435.648	372.487	383.241	395.994	386.788	240.44	216.164	261.894	367.213	368.304	180.717	187.185	172.946		0.844183	1.06106	1.09476	0.718425	0.614266	0.632001	0.653032	0.63785	0.396508	0.356475	0.431888	0.605569	0.607368	0.298019	0.308686	0.285204		+	1.93541	0.00308518	-0.604634	+	2.19502	0.000458333	-0.712915	+
702	Q16643	DBN1	Drebrin OS=Homo sapiens OX=9606 GN=DBN1 PE=1 SV=4	1			121.35	117.94	113.383	33.5629	36.3621	32.351	101.492	88.9942	31.2405	25.5445	34.2845	92.3127	98.2909	26.6886	35.4135	18.3908		1.03226	1.00325	0.964488	0.285502	0.309313	0.275193	0.863338	0.757026	0.265746	0.217293	0.29164	0.785255	0.836108	0.227026	0.301244	0.156441		+	5.20034	0	-1.78703	+	2.59179	0	-1.65717	+
703	Q9UJU6	DBNL	Drebrin-like protein OS=Homo sapiens OX=9606 GN=DBNL PE=1 SV=1	2			351.867	432.424	462.59	289.28	293.063	272.072	303.06	345.042	245.12	224.794	269.01	262.716	278.002	179.416	177.62	200.832		0.846593	1.04041	1.11299	0.696009	0.705111	0.654606	0.729163	0.830172	0.58976	0.540855	0.647239	0.632096	0.668874	0.431676	0.427354	0.483202		+	1.91633	0.00602681	-0.536515	+	1.3493	0.00714216	-0.396604	+
704	P11182	DBT	Lipoamide acyltransferase component of branched-chain alpha-keto acid dehydrogenase complex, mitochondrial OS=Homo sapiens OX=9606 GN=DBT PE=1 SV=3	1			270.666	345.887	336.092	191.627	221.035	188.728	220.048	229.131	151.647	143.34	151.934	231.688	224.127	126.251	114.966	126.893		0.852362	1.08924	1.0584	0.603458	0.696067	0.594328	0.692959	0.721563	0.477556	0.451396	0.478459	0.729615	0.705804	0.39758	0.362043	0.399602		+	2.10921	0.0015873	-0.658929	+	3.12187	0.00116265	-0.592461	+
705	Q9Y4B6	DCAF1	DDB1- and CUL4-associated factor 1 OS=Homo sapiens OX=9606 GN=DCAF1 PE=1 SV=3	11			1727.41	2163.27	2318.92	1483.05	1396.69	1546.38	1097.23	1196.63	866.087	783.364	982.067	1098.99	1108.74	629.839	654.598	710.132		0.834551	1.04513	1.12032	0.716495	0.674773	0.747092	0.530097	0.578119	0.418426	0.378461	0.474459	0.530947	0.535658	0.30429	0.316251	0.343081			1.62039	0.015214	-0.478601	+	1.24019	0.0078218	-0.391678	+
706	Q5T6F0	DCAF12	DDB1- and CUL4-associated factor 12 OS=Homo sapiens OX=9606 GN=DCAF12 PE=1 SV=1	2			394.4	503.209	507.936	267.99	264.076	258.038	301.093	301.657	176.385	157.541	170.944	265.636	260.324	122.654	125.337	115.922		0.841809	1.07405	1.08414	0.571999	0.563645	0.550757	0.642654	0.643858	0.376477	0.336256	0.364863	0.566974	0.555636	0.261793	0.26752	0.247424		+	2.61596	0.000464183	-0.821583	+	3.04899	0.000220249	-0.842233	+
707	Q9NV06	DCAF13	DDB1- and CUL4-associated factor 13 OS=Homo sapiens OX=9606 GN=DCAF13 PE=1 SV=2	5			2013.06	2606.86	2665.06	1432.27	1353.24	1335.01	1290.65	1256.67	652.397	627.223	709.72	1103.31	1126.92	527.457	530.496	537.073		0.828991	1.07352	1.09749	0.589818	0.557273	0.549765	0.531498	0.517505	0.268661	0.258294	0.292267	0.45435	0.464073	0.21721	0.218462	0.22117		+	2.43023	0.000422977	-0.811433	+	3.06536	0	-0.943454	+
708	Q8WV16	DCAF4	DDB1- and CUL4-associated factor 4 OS=Homo sapiens OX=9606 GN=DCAF4 PE=1 SV=3	2			382.142	500.697	529.3	300.887	268.455	255.863	340.833	389.85	260.726	226.456	256.338	274.816	296.26	163.808	148.348	181.196		0.811837	1.0637	1.12446	0.639215	0.570316	0.543565	0.724078	0.828212	0.553896	0.481091	0.544574	0.583829	0.629386	0.348	0.315156	0.384939		+	2.04746	0.000662301	-0.764286	+	1.83472	0.00116447	-0.559388	+
709	P61962	DCAF7	DDB1- and CUL4-associated factor 7 OS=Homo sapiens OX=9606 GN=DCAF7 PE=1 SV=1	5			1622.29	1993.92	2092.45	1250.86	1089.18	1079.01	1086.6	1204.28	748.206	701.507	820.977	981.922	1052.35	540.436	537.654	576.292		0.852542	1.04784	1.09962	0.657349	0.572383	0.567038	0.571027	0.63287	0.393195	0.368654	0.431438	0.516017	0.553028	0.284009	0.282547	0.302851		+	2.2911	0.000627104	-0.734321	+	2.01336	0.0010482	-0.598846	+
710	Q96PD2	DCBLD2	Discoidin, CUB and LCCL domain-containing protein 2 OS=Homo sapiens OX=9606 GN=DCBLD2 PE=1 SV=1	6			630.612	832.541	892.648	582.336	510.812	538.872	616.506	741.488	466.379	393.891	441.163	793.447	893.184	529.229	486.907	533.537		0.803054	1.0602	1.13674	0.741577	0.650495	0.686228	0.785091	0.94425	0.593911	0.501601	0.5618	1.01042	1.13743	0.673948	0.620053	0.679434			1.47104	0.0106671	-0.515926	+	1.75017	0.00115742	-0.643732	+
711	Q9NPI6	DCP1A	mRNA-decapping enzyme 1A OS=Homo sapiens OX=9606 GN=DCP1A PE=1 SV=3	6			1028.48	1339.02	1306.78	720.003	645.208	648.049	652.179	731.815	432.134	377.342	496.009	716.235	718.607	357.595	352.696	390.395		0.83974	1.09329	1.06697	0.587873	0.526804	0.529123	0.532495	0.597517	0.352832	0.308095	0.404985	0.584796	0.586733	0.291971	0.287972	0.318752		+	2.54253	0.000338983	-0.859874	+	1.61833	0.00110378	-0.675801	+
712	Q8IU60	DCP2	m7GpppN-mRNA hydrolase OS=Homo sapiens OX=9606 GN=DCP2 PE=1 SV=3	2			323.561	388.282	428.53	236.984	234.133	223.182	272.475	311.69	179.222	177.495	203.63	317.632	332.197	187.375	190.916	203.996		0.851198	1.02146	1.12734	0.623438	0.615938	0.587129	0.716805	0.819969	0.471483	0.466939	0.535693	0.8356	0.873917	0.492931	0.502246	0.536656		+	2.35979	0.000624512	-0.706733	+	2.00793	0.00109323	-0.644626	+
713	Q14203	DCTN1	Dynactin subunit 1 OS=Homo sapiens OX=9606 GN=DCTN1 PE=1 SV=3	11			2752.7	3313.15	3193.88	1854.52	1746.49	1653.87	1974.49	2097.95	1294.76	1168.72	1437.69	2149.02	2226.81	1161.2	1122.35	1187.08		0.891829	1.07341	1.03476	0.600834	0.565834	0.535827	0.639702	0.679701	0.419481	0.378646	0.465788	0.696247	0.72145	0.37621	0.363623	0.384594		+	2.9988	0.000493902	-0.814337	+	1.95181	0.00110914	-0.651441	+
714	Q13561	DCTN2	Dynactin subunit 2 OS=Homo sapiens OX=9606 GN=DCTN2 PE=1 SV=4	13			3622.06	4351.33	4184.58	2374.55	2391.15	2063.77	1890.82	2405.37	1529.72	1468.01	1786.36	2353.75	2515.1	1242.35	1302.47	1364.05		0.89375	1.0737	1.03255	0.585924	0.59002	0.509239	0.466563	0.593529	0.377461	0.362234	0.440787	0.580792	0.620605	0.306552	0.321387	0.336582		+	2.84241	0.000515924	-0.830903	+	1.05218	0.00604359	-0.424585	+
715	O75935	DCTN3	Dynactin subunit 3 OS=Homo sapiens OX=9606 GN=DCTN3 PE=1 SV=1	3			873.28	984.058	966.979	410.653	386.514	353.73	475.259	592.285	313.871	244.697	341.487	618.427	633.982	264.349	272.49	265.497		0.927601	1.04527	1.02713	0.436197	0.410557	0.375733	0.504822	0.629127	0.333395	0.259918	0.362729	0.656895	0.673418	0.280792	0.28944	0.282012		+	4.01956	0	-1.29586	+	1.49164	0.000537897	-0.836503	+
716	Q9UJW0	DCTN4	Dynactin subunit 4 OS=Homo sapiens OX=9606 GN=DCTN4 PE=1 SV=1	7			2088.98	2622.98	2670.94	1579.57	1506	1504.33	1594.6	1743.64	1142.14	1068.86	1284.92	1747.75	1743.56	1086.26	1058.1	1142.89		0.848845	1.06583	1.08532	0.641849	0.611955	0.611276	0.647957	0.708518	0.464102	0.434325	0.52212	0.710188	0.708486	0.441396	0.429953	0.464407		+	2.36206	0.00127493	-0.677326	+	1.73626	0.0015901	-0.521151	+
717	Q9BTE1	DCTN5	Dynactin subunit 5 OS=Homo sapiens OX=9606 GN=DCTN5 PE=1 SV=1	2			542.068	651.866	697.383	396.495	370.375	342.634	491.099	500.795	304.075	300.677	354.253	448.359	480.317	234.662	227.636	233.558		0.859826	1.03399	1.10619	0.628919	0.587487	0.543485	0.778979	0.794359	0.482323	0.476933	0.561915	0.711185	0.761877	0.37222	0.361075	0.370469		+	2.44665	0.000537566	-0.764014	+	2.11909	0.00109062	-0.637643	+
718	Q9H773	DCTPP1	dCTP pyrophosphatase 1 OS=Homo sapiens OX=9606 GN=DCTPP1 PE=1 SV=1	1			254.1	280.124	249.058	97.0634	101.626	91.3306	99.879	108.792	57.4687	42.8739	55.7764	125.509	131.503	57.9415	48.0287	45.6611		0.973213	1.07289	0.953902	0.371757	0.389231	0.3498	0.38254	0.416678	0.220107	0.164209	0.213626	0.480704	0.503662	0.221918	0.183952	0.174884		+	4.50259	0	-1.43283	+	1.96082	0.000274336	-1.01433	+
719	Q9BTE7	DCUN1D5	DCN1-like protein 5 OS=Homo sapiens OX=9606 GN=DCUN1D5 PE=1 SV=1	5			337.252	424.571	454.929	305.612	270.753	287.811	237.818	248.79	145.2	140.684	154.337	245.743	246.627	147.674	137.892	157.678		0.831522	1.04681	1.12166	0.753511	0.667563	0.709621	0.586359	0.613412	0.358002	0.346868	0.38053	0.605899	0.608079	0.364102	0.339984	0.388768			1.58717	0.0143253	-0.483891	+	3.00824	0.000550688	-0.730199	+
720	Q16531	DDB1	DNA damage-binding protein 1 OS=Homo sapiens OX=9606 GN=DDB1 PE=1 SV=1	15			2255.92	3033.09	2891.55	1776.72	1625.93	1685.95	1276.29	1407.65	975.736	889.286	1056.25	1651.56	1526.55	1025.11	969.78	1093.45		0.827298	1.1123	1.0604	0.651564	0.596266	0.618277	0.468045	0.516218	0.357825	0.326122	0.387351	0.605665	0.559821	0.375931	0.355641	0.400993		+	2.09551	0.0015625	-0.674101	+	1.65179	0.00323659	-0.464545	+
721	Q92466	DDB2	DNA damage-binding protein 2 OS=Homo sapiens OX=9606 GN=DDB2 PE=1 SV=1	1			81.1014	95.0301	111.308	72.0978	66.7313	59.0588	77.2354	84.3946	53.3181	51.6486	46.3986	79.9186	83.6899	49.2584	50.7417	56.988		0.846454	0.991827	1.16172	0.752483	0.696473	0.616395	0.806104	0.880825	0.55648	0.539055	0.484261	0.834109	0.87347	0.514109	0.52959	0.594783		+	1.56479	0.00825028	-0.531375	+	2.2963	0.000597744	-0.680728	+
722	P39656	DDOST	Dolichyl-diphosphooligosaccharide--protein glycosyltransferase 48 kDa subunit OS=Homo sapiens OX=9606 GN=DDOST PE=1 SV=4	14			1480.94	1962.66	1996.07	1561.81	1392.35	1621.71	1100.71	1153.11	825.928	701.053	860.805	1705.4	1559.58	678.461	1019.99	1080.57		0.816744	1.08241	1.10084	0.861345	0.767887	0.89438	0.607046	0.635945	0.455503	0.386634	0.474737	0.940535	0.860115	0.374174	0.562529	0.595939			0.707117	0.373427	-0.23941	+	1.62078	0.00203994	-0.506835	+
723	Q08345	DDR1	Epithelial discoidin domain-containing receptor 1 OS=Homo sapiens OX=9606 GN=DDR1 PE=1 SV=1	4			438.659	557.532	587.647	368.519	356.843	332.232	488.616	558.036	362.89	299.704	339.61	635.505	681.03	420.508	407.744	429.269		0.830879	1.05604	1.11308	0.698024	0.675908	0.629292	0.925504	1.05699	0.687362	0.567679	0.643267	1.20373	1.28996	0.796498	0.772321	0.813093		+	1.85479	0.00417155	-0.572628	+	1.84278	0.0010702	-0.64888	+
724	Q96HY6	DDRGK1	DDRGK domain-containing protein 1 OS=Homo sapiens OX=9606 GN=DDRGK1 PE=1 SV=2	2			56.1668	84.256	86.5291	111.606	102.316	138.317	38.9957	34.3666	30.3798	25.7781	33.1505	86.2738	70.6765	46.9578	71.524	77.6679		0.74245	1.11375	1.1438	1.47528	1.35248	1.82837	0.515471	0.45428	0.40158	0.340752	0.438205	1.14042	0.934249	0.620719	0.945451	1.02667		+	1.27116	0.00331476	0.649176		0.854932	0.0350183	-0.306065
725	P30046	DDT	D-dopachrome decarboxylase OS=Homo sapiens OX=9606 GN=DDT PE=1 SV=3	3			979.561	1133.38	1129.77	758.18	841.401	804.111	338.937	377.558	296.159	244.36	316.688	700.974	696.255	543.637	528.607	547.26		0.906243	1.04855	1.04521	0.701432	0.778424	0.743925	0.313568	0.349298	0.273992	0.22607	0.292984	0.648507	0.644142	0.502947	0.489042	0.506299			2.20099	0.0240039	-0.429975		0.911653	0.0219734	-0.33271	+
726	Q92499	DDX1	ATP-dependent RNA helicase DDX1 OS=Homo sapiens OX=9606 GN=DDX1 PE=1 SV=2	10			1244.69	1607.65	1702.73	1129.88	1022.42	1036.45	1211.75	1231.89	945.637	862.164	1004.47	1227.95	1257.68	771.829	753.133	954.806		0.819761	1.05881	1.12143	0.744147	0.673373	0.682613	0.798067	0.811331	0.622803	0.567827	0.661551	0.808736	0.828317	0.508332	0.496019	0.628842			1.58111	0.0110157	-0.502927	+	1.72108	0.00698281	-0.38504	+
727	Q13206	DDX10	Probable ATP-dependent RNA helicase DDX10 OS=Homo sapiens OX=9606 GN=DDX10 PE=1 SV=2	8			2014.22	2439.77	2275.38	1212.28	1120.18	1198.11	1567.02	1561.38	750.868	703.204	755.224	1569.42	1472.51	664.025	637.153	647.74		0.897953	1.08767	1.01438	0.540443	0.499384	0.534126	0.698588	0.696074	0.334742	0.313493	0.336684	0.699658	0.656455	0.296027	0.284047	0.288767		+	3.33277	0.000242105	-0.926953	+	3.87792	0	-1.08755	+
728	Q96FC9	DDX11	ATP-dependent DNA helicase DDX11 OS=Homo sapiens OX=9606 GN=DDX11 PE=1 SV=1	6			1828.93	2317.07	1920.82	1399.71	1284.49	1349.61	1134.55	1249.51	810.458	774.443	930.04	889.883	888.103	455.194	502.28	504.567		0.904393	1.14577	0.949832	0.692147	0.635171	0.667373	0.561027	0.617874	0.400766	0.382957	0.459898	0.440041	0.439161	0.22509	0.248374	0.249505		+	2.21264	0.00332539	-0.582053	+	1.67386	0.00175712	-0.510606	+
729	Q92841	DDX17	Probable ATP-dependent RNA helicase DDX17 OS=Homo sapiens OX=9606 GN=DDX17 PE=1 SV=2	18			2633.72	3418.43	3617.77	2238.41	1958.96	2072.88	2560.04	2704.71	1945.91	1828.89	2021.04	1918.71	1984.64	1089.82	1112.02	1244.85		0.817086	1.06054	1.12238	0.694445	0.607749	0.643091	0.794228	0.83911	0.6037	0.567396	0.627008	0.595261	0.615716	0.338106	0.344994	0.386203		+	1.80942	0.00305771	-0.613779	+	2.26425	0.00324875	-0.446983	+
730	Q9NVP1	DDX18	ATP-dependent RNA helicase DDX18 OS=Homo sapiens OX=9606 GN=DDX18 PE=1 SV=2	11			3110.24	3372.9	2821.28	1212.54	1121.37	1149.3	2374.96	2500.96	1012.97	967.33	1008.94	2460.34	2388.66	841.021	809.402	763.483		1.00283	1.08752	0.909658	0.390956	0.36156	0.370566	0.765752	0.806378	0.326609	0.311894	0.32531	0.793281	0.770169	0.271168	0.260973	0.246168		+	4.18741	0	-1.41444	+	4.21466	0	-1.29069	+
731	Q9NUU7	DDX19A	ATP-dependent RNA helicase DDX19A OS=Homo sapiens OX=9606 GN=DDX19A PE=1 SV=1	3			269.274	311.804	337.651	205.257	176.207	170.127	167.733	180.253	103.633	89.7708	95.0841	165.767	164.424	73.2864	67.7332	84.8255		0.879282	1.01816	1.10256	0.670242	0.575383	0.555529	0.547712	0.588595	0.338401	0.293136	0.310486	0.541292	0.536907	0.239308	0.221175	0.276988		+	2.35671	0.000639566	-0.734644	+	2.65554	0.000217163	-0.857069	+
732	Q9UMR2	DDX19B	ATP-dependent RNA helicase DDX19B OS=Homo sapiens OX=9606 GN=DDX19B PE=1 SV=1	12			3603.89	4460.24	4473.81	2735.82	2477.63	2629.5	1793.71	1968.01	1275.73	1213.78	1403.01	1964.59	2032.73	1080.32	1094.62	1154.28		0.862316	1.06722	1.07047	0.65461	0.592832	0.62917	0.429188	0.470893	0.305249	0.290426	0.335703	0.470075	0.486379	0.258492	0.261914	0.276189		+	2.41793	0.00132181	-0.670819	+	1.9782	0.00135648	-0.536724	+
733	Q9UHI6	DDX20	Probable ATP-dependent RNA helicase DDX20 OS=Homo sapiens OX=9606 GN=DDX20 PE=1 SV=2	12			1565.53	2255.46	2482.24	1686.46	1648.99	1732.2	1069.8	1257.51	1161.96	1026.53	1209.96	1355.54	1391.65	1174.52	1166.08	1268.22		0.745108	1.07348	1.18141	0.802665	0.784831	0.824434	0.509168	0.598507	0.553031	0.488573	0.575876	0.645164	0.662351	0.559009	0.554992	0.603605			0.637551	0.303062	-0.287843		0.104391	0.816324	-0.0375236
734	Q9NR30	DDX21	Nucleolar RNA helicase 2 OS=Homo sapiens OX=9606 GN=DDX21 PE=1 SV=5	14			4605.42	5580.13	5439.45	2620.21	2363.13	2607.81	4049.02	4215.18	1819.86	1774.84	1760.12	3206.72	3497.51	1127.71	1262.11	1305.55		0.884241	1.07138	1.04437	0.50308	0.453721	0.5007	0.777412	0.809315	0.349413	0.340769	0.337943	0.61569	0.671522	0.21652	0.242325	0.250666		+	3.32156	0	-1.03796	+	4.53869	0	-1.21085	+
735	Q9BUQ8	DDX23	Probable ATP-dependent RNA helicase DDX23 OS=Homo sapiens OX=9606 GN=DDX23 PE=1 SV=3	14			4246.14	5421.67	5633.41	3737.52	3475.42	3699.72	2819.71	3184.42	2362.88	2317.75	2774.5	2906.32	3023.53	1722.13	1976.5	2115.14		0.83251	1.06299	1.1045	0.732789	0.681401	0.725377	0.55284	0.624346	0.463273	0.454425	0.543976	0.569821	0.592802	0.337646	0.387518	0.4147			1.65055	0.0152192	-0.477404		0.94	0.0564217	-0.274789	+
736	Q9GZR7	DDX24	ATP-dependent RNA helicase DDX24 OS=Homo sapiens OX=9606 GN=DDX24 PE=1 SV=1	15			3811.1	4558.91	3378.38	2619.85	2492.18	2638.46	2351.84	2361.91	1393.4	1349.57	1383.87	3142.91	2789.01	1186.11	1313.49	1239.96		0.97318	1.16414	0.862683	0.66899	0.636388	0.673742	0.600552	0.603123	0.35581	0.344618	0.353377	0.802555	0.712185	0.302878	0.335405	0.316629		+	1.99767	0.00347613	-0.589546	+	4.54564	0.000201954	-0.776933	+
737	Q96GQ7	DDX27	Probable ATP-dependent RNA helicase DDX27 OS=Homo sapiens OX=9606 GN=DDX27 PE=1 SV=2	12			1832.69	2272.91	2098.72	1180.81	1169.98	1327.96	1348.2	1337.72	792.665	723.14	884.461	2057.71	2002.26	1013.38	1051.92	1033.3		0.886168	1.09903	1.0148	0.570962	0.565725	0.642114	0.651901	0.646833	0.383281	0.349663	0.427667	0.994973	0.968161	0.490004	0.508639	0.499636		+	2.64703	0.000640999	-0.750847	+	2.21071	0.000523187	-0.752072	+
738	Q9NUL7	DDX28	Probable ATP-dependent RNA helicase DDX28 OS=Homo sapiens OX=9606 GN=DDX28 PE=1 SV=2	10			1895.51	2299.78	2379.39	1546.48	1336.81	1343.16	1157.45	1282.58	918.702	803.01	906.656	995.005	1075.45	585.225	516.479	619.674		0.864914	1.04938	1.08571	0.705653	0.609981	0.612878	0.52814	0.585236	0.4192	0.36641	0.413703	0.454017	0.490724	0.267036	0.235667	0.282755		+	2.16882	0.00195589	-0.633753	+	1.79627	0.0026655	-0.478404	+
739	Q9H8H2	DDX31	Probable ATP-dependent RNA helicase DDX31 OS=Homo sapiens OX=9606 GN=DDX31 PE=1 SV=2	7			2029.24	2540	2455.43	1070.53	962.508	1041.77	1537.23	1556.55	649.31	600.5	672.844	1771.8	1667.08	609.865	584.72	601.449		0.86662	1.08475	1.04863	0.457187	0.411055	0.444905	0.656499	0.66475	0.277298	0.256453	0.287349	0.756676	0.711954	0.260453	0.249714	0.256859		+	3.36529	0	-1.1865	+	3.5781	0	-1.27282	+
740	O00148	DDX39A	ATP-dependent RNA helicase DDX39A OS=Homo sapiens OX=9606 GN=DDX39A PE=1 SV=2	5			1244.69	1668.34	1801.79	1120.25	1005.91	1010.44	685.674	856.248	565.554	564.809	660.007	677.823	724.865	433.857	426.961	466.648		0.791986	1.06155	1.14646	0.712806	0.640052	0.642934	0.436289	0.544823	0.359857	0.359383	0.419957	0.431293	0.461225	0.27606	0.271672	0.296924		+	1.54791	0.00521562	-0.572108		1.00871	0.0127215	-0.364473	+
741	Q13838	DDX39B	Spliceosome RNA helicase DDX39B OS=Homo sapiens OX=9606 GN=DDX39B PE=1 SV=1	11			2431.73	3578.53	3639.07	2417.82	2200.4	2256.17	1228.77	1728.48	1233.5	1212.21	1381.22	1330.99	1539.02	953.216	992.352	1015		0.756031	1.11257	1.1314	0.751706	0.68411	0.701449	0.382028	0.537389	0.383498	0.376879	0.429425	0.413808	0.478485	0.296357	0.308525	0.315566			1.12942	0.0279649	-0.466524		0.398387	0.220942	-0.194579	+
742	O00571	DDX3X	ATP-dependent RNA helicase DDX3X OS=Homo sapiens OX=9606 GN=DDX3X PE=1 SV=3	15			3365.41	4131.82	4057.03	2579.15	2206.77	2342.35	4066.65	4498.48	2856.61	3044.57	3295.54	2612.42	2918.46	1612.25	1569.05	1691.27		0.87381	1.0728	1.05339	0.669662	0.572976	0.608178	1.05588	1.16801	0.741703	0.790506	0.855669	0.6783	0.757762	0.418612	0.407395	0.439129		+	2.41856	0.00084678	-0.693732	+	1.84261	0.00235242	-0.482953	+
743	Q9UJV9	DDX41	Probable ATP-dependent RNA helicase DDX41 OS=Homo sapiens OX=9606 GN=DDX41 PE=1 SV=2	8			1874.34	2231.68	2136.18	1555.56	1428.33	1451.28	1148.85	1269.33	867.678	782.736	896.148	1315.43	1311	822.575	849.545	852.712		0.900807	1.07254	1.02665	0.747602	0.686455	0.697485	0.552137	0.61004	0.417006	0.376183	0.430689	0.632195	0.630066	0.395329	0.408291	0.409813		+	2.35646	0.00923596	-0.490152	+	1.92558	0.0015776	-0.510916	+
744	Q86XP3	DDX42	ATP-dependent RNA helicase DDX42 OS=Homo sapiens OX=9606 GN=DDX42 PE=1 SV=1	4			288.765	381.768	371.954	234.027	231.396	239.875	202.157	221.375	155.785	127.909	152.959	223.256	238.009	145.218	140.041	145.276		0.830989	1.09863	1.07038	0.673467	0.665896	0.690296	0.581754	0.637058	0.448308	0.368088	0.440175	0.642471	0.684927	0.417899	0.403001	0.418066		+	1.88871	0.0051382	-0.552798	+	1.63427	0.00149842	-0.545045	+
745	Q7L014	DDX46	Probable ATP-dependent RNA helicase DDX46 OS=Homo sapiens OX=9606 GN=DDX46 PE=1 SV=2	15			5129.7	6100.85	6209.54	3605.65	3209.66	3189.47	2583.77	3199.2	2259.42	2334.26	3012.63	1870.8	2337.1	1667	1334.94	1661.39		0.882398	1.04945	1.06815	0.620235	0.552118	0.548645	0.444454	0.550318	0.38866	0.401533	0.518225	0.32181	0.402022	0.286753	0.229633	0.285788		+	2.79407	0.00043843	-0.798791		0.383025	0.22509	-0.193614	+
746	Q9H0S4	DDX47	Probable ATP-dependent RNA helicase DDX47 OS=Homo sapiens OX=9606 GN=DDX47 PE=1 SV=1	16			5506.91	6520.71	5381.94	4010.23	3562.48	3861.21	6161.58	5890.35	2805.42	2803.76	2945.09	5302.1	4411.73	2202.71	2180.6	2268.46		0.948946	1.12364	0.927411	0.691039	0.613883	0.66536	1.06176	1.01502	0.483427	0.483141	0.507495	0.913653	0.760225	0.379569	0.375759	0.390899		+	2.40609	0.00240957	-0.602926	+	3.99111	0	-1.07953	+
747	Q9Y6V7	DDX49	Probable ATP-dependent RNA helicase DDX49 OS=Homo sapiens OX=9606 GN=DDX49 PE=1 SV=1	14			3997.08	4999.07	5129.68	2847.69	2439.47	2523.87	2874.61	2841.11	1605.27	1415.11	1526.89	2569.23	2527.96	1078.09	1090	1090.29		0.848887	1.06169	1.08943	0.604784	0.518087	0.536012	0.610501	0.603386	0.340922	0.300537	0.324276	0.545645	0.53688	0.228961	0.231491	0.231552		+	2.51221	0.000511041	-0.849159	+	3.04384	0.000272527	-0.916802	+
748	P17844	DDX5	Probable ATP-dependent RNA helicase DDX5 OS=Homo sapiens OX=9606 GN=DDX5 PE=1 SV=1	11			1539.08	1983.76	2162.04	1376.34	1188.32	1263.24	1322.58	1446.86	1112.24	1060.96	1140.36	989.529	1062.58	603.524	589.382	614.858		0.812197	1.04686	1.14094	0.726316	0.627095	0.666631	0.697946	0.763531	0.586946	0.559885	0.601786	0.52219	0.56074	0.318489	0.311026	0.32447		+	1.60477	0.00575879	-0.558603		1.86414	0.0152916	-0.325364	+
749	Q9BQ39	DDX50	ATP-dependent RNA helicase DDX50 OS=Homo sapiens OX=9606 GN=DDX50 PE=1 SV=1	9			1321.34	1694.54	1683.83	833.244	721.626	824.742	1383.58	1446.45	676.311	615.841	675.228	1431.98	1462.73	568.791	570.179	562.455		0.843461	1.08169	1.07485	0.531891	0.460641	0.526464	0.883191	0.923323	0.431715	0.393114	0.431023	0.914086	0.933715	0.36308	0.363967	0.359036		+	2.70212	0.000251366	-0.975498	+	3.41219	0	-1.11052	+
750	Q8N8A6	DDX51	ATP-dependent RNA helicase DDX51 OS=Homo sapiens OX=9606 GN=DDX51 PE=1 SV=3	9			1577.86	1988.5	2089.51	1251.34	1193.91	1342.12	1113.67	1039.63	587.26	538.853	628.029	1042.23	934.329	388.801	485.209	502.155		0.836932	1.05474	1.10832	0.663739	0.633277	0.71189	0.590715	0.551443	0.311496	0.28582	0.333121	0.552822	0.495589	0.206229	0.257366	0.266354		+	1.87964	0.00435055	-0.569711	+	2.64085	0.000231343	-0.882717	+
751	Q9Y2R4	DDX52	Probable ATP-dependent RNA helicase DDX52 OS=Homo sapiens OX=9606 GN=DDX52 PE=1 SV=3	8			2011.11	2618.99	2559	1511.9	1210.4	1375.92	1139.85	1082.1	551.414	479.093	453.718	1114.98	1082.23	358.787	412.339	420.307		0.839233	1.0929	1.06787	0.630913	0.505098	0.574169	0.475658	0.451559	0.230104	0.199925	0.189336	0.465279	0.451613	0.149721	0.172068	0.175393		+	2.2051	0.000387097	-0.80678	+	2.73197	0	-1.17152	+
752	Q8TDD1	DDX54	ATP-dependent RNA helicase DDX54 OS=Homo sapiens OX=9606 GN=DDX54 PE=1 SV=2	13			3133.19	2994.1	1792.93	1507.95	1446.46	1512.44	2074.66	1928.63	1054.04	921.024	1057.84	2425.01	1935.38	920.319	1023.83	904.036		1.18678	1.1341	0.679121	0.571177	0.547886	0.572878	0.785834	0.730521	0.399246	0.348863	0.400686	0.918539	0.733078	0.348596	0.387804	0.342428		+	1.40883	0.000847407	-0.78336	+	2.74118	0	-0.987438	+
753	Q8NHQ9	DDX55	ATP-dependent RNA helicase DDX55 OS=Homo sapiens OX=9606 GN=DDX55 PE=1 SV=3	8			1470.41	1812.23	1627.25	1175.39	1020.79	979.044	826.127	1001.88	787.484	664.52	729.315	1087.14	1062.57	563.077	548.509	556.054		0.898438	1.10729	0.994269	0.718177	0.623715	0.598207	0.504773	0.61216	0.481162	0.406029	0.44562	0.664255	0.649243	0.344047	0.335145	0.339755		+	2.22104	0.00198621	-0.62805		1.00411	0.0222961	-0.326799	+
754	Q9NY93	DDX56	Probable ATP-dependent RNA helicase DDX56 OS=Homo sapiens OX=9606 GN=DDX56 PE=1 SV=1	9			2066.06	2414.77	2207.07	953.868	846.006	921.654	1944.9	1747.4	670.706	599.832	716.065	1950.43	1770.7	566.851	574.471	555.903		0.926775	1.0832	0.990028	0.427878	0.379494	0.413428	0.872426	0.783833	0.300859	0.269067	0.321206	0.874907	0.794285	0.254273	0.257691	0.249362		+	4.00617	0	-1.296	+	3.02702	0	-1.48094	+
755	P26196	DDX6	Probable ATP-dependent RNA helicase DDX6 OS=Homo sapiens OX=9606 GN=DDX6 PE=1 SV=2	13			2053.59	2706.67	2767.3	1568.46	1526.17	1578.43	1511.66	1708.57	1100.24	926.628	1079.06	1877.37	1780.98	965.466	913.597	1099.58		0.818429	1.0787	1.10287	0.625087	0.608233	0.62906	0.60245	0.680926	0.438485	0.369294	0.430044	0.748199	0.709784	0.384772	0.364101	0.438222		+	2.07862	0.00156152	-0.675131	+	1.88059	0.00117058	-0.638576	+
756	Q16698	DECR1	2,4-dienoyl-CoA reductase, mitochondrial OS=Homo sapiens OX=9606 GN=DECR1 PE=1 SV=1	4			1585.38	2024.97	2073.51	1177.64	1085.32	1181.9	1038.15	1166.38	703.735	627.747	766.856	1312.05	1247.52	762.866	718.714	816.194		0.83678	1.0688	1.09442	0.621571	0.572843	0.623819	0.547946	0.615627	0.371439	0.331331	0.404755	0.692514	0.658454	0.402649	0.379345	0.430796		+	2.26796	0.000626959	-0.713226	+	1.87695	0.00112092	-0.658564	+
757	P35659	DEK	Protein DEK OS=Homo sapiens OX=9606 GN=DEK PE=1 SV=1	2			413.783	469.598	522.979	302.295	261.269	282.602	394.412	429.65	297.298	254.879	301.135	297.134	319.38	222.276	164.277	195.871		0.882668	1.00173	1.1156	0.644846	0.55733	0.602837	0.841346	0.916515	0.634186	0.543699	0.642371	0.633836	0.681291	0.474152	0.35043	0.417825		+	2.49827	0.000647758	-0.72893	+	1.78631	0.00150158	-0.537388	+
758	Q6ZUT9	DENND5B	DENN domain-containing protein 5B OS=Homo sapiens OX=9606 GN=DENND5B PE=1 SV=2	1			248.175	303.384	311.958	175.447	166.182	162.335	172.957	196.029	121.583	108.639	136.783	135.981	152.83	78.1756	93.5728	78.2014		0.862201	1.05401	1.08379	0.609532	0.577344	0.563978	0.600881	0.681037	0.422399	0.37743	0.475207	0.47242	0.530957	0.271595	0.325087	0.271685		+	2.67303	0.000374566	-0.77036	+	1.61654	0.00105341	-0.596283	+
759	Q5TB30	DEPDC1	DEP domain-containing protein 1A OS=Homo sapiens OX=9606 GN=DEPDC1 PE=1 SV=2	2			48.1089	62.733	66.4137	42.7173	43.5201	39.3745	45.9992	45.5179	23.6512	26.2497	23.2	43.4055	44.812	18.717	16.2762	19.4915		0.814229	1.06174	1.12403	0.722978	0.736565	0.666402	0.778523	0.770377	0.40029	0.444269	0.392653	0.734626	0.75843	0.31678	0.27547	0.329888			1.49465	0.0154001	-0.484415	+	2.97894	0.000266667	-0.911242	+
760	Q8WUY9	DEPDC1B	DEP domain-containing protein 1B OS=Homo sapiens OX=9606 GN=DEPDC1B PE=1 SV=2	2			423.701	493.255	504.96	282.796	253.444	262.921	263.087	256.932	149.88	133.282	146.829	215	191.296	84.7233	92.9888	99.6781		0.893937	1.04068	1.06538	0.596651	0.534724	0.554718	0.555069	0.542083	0.316221	0.281202	0.309784	0.453613	0.403602	0.178752	0.19619	0.210304		+	3.07583	0.00033557	-0.828497	+	2.96263	0.000227106	-0.860988	+
761	O75140	DEPDC5	GATOR complex protein DEPDC5 OS=Homo sapiens OX=9606 GN=DEPDC5 PE=1 SV=2	1			193.34	236.228	253.864	145.148	130.313	134.278	125.5	152.553	86.3292	91.8112	107.254	118.449	127.007	68.6857	69.239	76.1567		0.848687	1.03695	1.11436	0.637143	0.572023	0.589428	0.550896	0.669648	0.378952	0.403015	0.470803	0.519945	0.557511	0.301503	0.303932	0.334298		+	2.35133	0.00062489	-0.730216	+	1.37971	0.0016052	-0.546601	+
762	Q9Y315	DERA	Deoxyribose-phosphate aldolase OS=Homo sapiens OX=9606 GN=DERA PE=1 SV=2	4			1159.59	1464.02	1498.27	915.699	876.714	934.29	639.344	703.239	483.867	426.176	601.224	851.023	806.1	452.111	497.657	572.981		0.843977	1.06555	1.09048	0.666467	0.638093	0.679998	0.465329	0.511834	0.35217	0.310181	0.437585	0.619394	0.586698	0.329057	0.362206	0.417029		+	2.07833	0.0033193	-0.587261	+	0.939706	0.00671514	-0.427316	+
763	Q9BUN8	DERL1	Derlin-1 OS=Homo sapiens OX=9606 GN=DERL1 PE=1 SV=1	3			128.812	170.972	178.976	153.745	123.722	133.521	106.069	109.64	86.6887	65.3868	81.4891	106.449	104.395	60.1919	65.7692	82.5427		0.80716	1.07134	1.1215	0.963395	0.775265	0.836668	0.664648	0.687025	0.543208	0.409726	0.510626	0.667029	0.654159	0.377174	0.412122	0.517228			0.533921	0.429893	-0.211362	+	1.23734	0.00336945	-0.480333	+
764	O00273	DFFA	DNA fragmentation factor subunit alpha OS=Homo sapiens OX=9606 GN=DFFA PE=1 SV=1	1			180.509	231.266	250.019	158.739	139.635	158.115	109.956	110.02	71.159	75.4887	83.6951	121.802	130.918	83.294	66.7571	78.465		0.818271	1.04836	1.13337	0.719585	0.632984	0.716756	0.498445	0.498735	0.322573	0.3422	0.379401	0.552145	0.593469	0.377583	0.302619	0.355692		+	1.56596	0.00885037	-0.52479	+	2.01402	0.00147281	-0.521791	+
765	O76075	DFFB	DNA fragmentation factor subunit beta OS=Homo sapiens OX=9606 GN=DFFB PE=1 SV=1	1			369.592	445.789	439.577	247.098	213.043	205.672	297.944	276.257	133.812	129.171	152.786	222.948	200.457	90.6527	96.2164	89.2505		0.883516	1.06567	1.05082	0.590692	0.509283	0.491663	0.712241	0.660397	0.31988	0.308786	0.365238	0.532961	0.479196	0.216707	0.230007	0.213355		+	2.81196	0.000203091	-0.913946	+	2.6945	0	-1.05353	+
766	O75907	DGAT1	Diacylglycerol O-acyltransferase 1 OS=Homo sapiens OX=9606 GN=DGAT1 PE=1 SV=2	3			101.174	133.304	135.059	86.0457	95.0032	91.6293	57.943	60.6994	40.1858	37.2402	43.4924	46.9542	52.0155	25.6676	40.421	24.5335		0.821358	1.0822	1.09645	0.698542	0.771261	0.743871	0.470397	0.492774	0.326239	0.302326	0.353083	0.381187	0.422276	0.208376	0.328148	0.19917			1.40129	0.0389544	-0.427348	+	2.11761	0.00102265	-0.560055	+
767	Q8WYQ5	DGCR8	Microprocessor complex subunit DGCR8 OS=Homo sapiens OX=9606 GN=DGCR8 PE=1 SV=1	2			187.525	242.074	250.013	133.048	141.552	124.242	139.151	142.618	90.7124	91.8697	98.5884	118.423	136.571	62.788	62.8408	73.4655		0.827789	1.06858	1.10363	0.587312	0.624851	0.548439	0.614252	0.629556	0.40043	0.405539	0.435197	0.522753	0.602863	0.277164	0.277397	0.324298		+	2.22903	0.000688047	-0.759368	+	2.88035	0.00112454	-0.588896	+
768	P23743	DGKA	Diacylglycerol kinase alpha OS=Homo sapiens OX=9606 GN=DGKA PE=1 SV=3	4			437.551	613.703	785.685	395.317	337.36	358.763	498.842	634.34	403.925	351.117	472.68	657.611	698.582	383.383	416.751	476.245		0.714587	1.00227	1.28314	0.645613	0.55096	0.585914	0.814685	1.03597	0.659671	0.573427	0.771958	1.07398	1.14089	0.626123	0.680618	0.77778		+	1.31719	0.00177483	-0.713538	+	0.972538	0.00410175	-0.469619	+
769	Q13574	DGKZ	Diacylglycerol kinase zeta OS=Homo sapiens OX=9606 GN=DGKZ PE=1 SV=3	3			834.593	1024.37	1037.81	515.346	476.236	483.022	828.563	786.051	391.379	357.638	352.485	551.278	523.993	240.746	217.036	224.312		0.864334	1.06087	1.07479	0.53371	0.493207	0.500235	0.858089	0.814062	0.405326	0.370382	0.365046	0.570923	0.542666	0.249325	0.22477	0.232305		+	3.07184	0	-0.967967	+	3.34734	0	-1.13774	+
770	Q7Z3D6	DGLUCY	D-glutamate cyclase, mitochondrial OS=Homo sapiens OX=9606 GN=DGLUCY PE=1 SV=2	1			57.9441	72.2817	72.8849	37.6142	34.539	38.2802	45.6783	45.988	35.698	25.2217	27.6113	54.5016	51.6279	22.1954	29.9809	28.9949		0.85585	1.06762	1.07653	0.555572	0.51015	0.565409	0.674681	0.679255	0.527269	0.372531	0.407826	0.805003	0.762558	0.327832	0.442826	0.428263		+	2.75341	0.000171963	-0.872603	+	1.35902	0.00105609	-0.651127	+
771	Q15392	DHCR24	Delta(24)-sterol reductase OS=Homo sapiens OX=9606 GN=DHCR24 PE=1 SV=2	3			146.956	191.991	205.277	116.255	136.337	147.663	78.3529	89.8256	51.3363	65.4141	81.3665	105.865	91.2163	50.2644	65.2398	67.9981		0.810086	1.05834	1.13158	0.640848	0.751549	0.813983	0.431915	0.495158	0.282988	0.360591	0.448528	0.583574	0.502824	0.277079	0.35963	0.374835			1.14583	0.0425958	-0.435739		0.607233	0.0196263	-0.370551	+
772	Q9UBM7	DHCR7	7-dehydrocholesterol reductase OS=Homo sapiens OX=9606 GN=DHCR7 PE=1 SV=1	9			3133.78	3966.7	4169.08	2723.47	2477.34	2961.63	1227.47	1313.65	1017.71	934.481	1182.83	1633.87	1677.79	1009.71	1173.19	1292.59		0.834224	1.05595	1.10983	0.724998	0.659477	0.788397	0.326757	0.349699	0.270918	0.248762	0.314874	0.434942	0.446634	0.268789	0.312308	0.344092			1.44671	0.0224092	-0.458314		0.922038	0.0465917	-0.288032	+
773	P49366	DHPS	Deoxyhypusine synthase OS=Homo sapiens OX=9606 GN=DHPS PE=1 SV=1	1			259.944	309.933	325.488	182.436	187.159	179.845	172.231	191.212	115.481	96.8114	121.621	232.319	217.821	139.037	140.82	137.472		0.870965	1.03846	1.09058	0.611268	0.627093	0.602587	0.577075	0.640673	0.386929	0.324375	0.407502	0.778405	0.729829	0.465856	0.47183	0.460612		+	2.65605	0.000568675	-0.698118	+	1.82989	0.000416272	-0.711993	+
774	Q9Y394	DHRS7	Dehydrogenase/reductase SDR family member 7 OS=Homo sapiens OX=9606 GN=DHRS7 PE=1 SV=1	2			473.633	588.216	600.793	406.18	375.157	372.876	364.019	424.085	295.777	259.015	308.956	430.815	475.197	296.221	276.866	321.859		0.854603	1.06135	1.08405	0.732894	0.676917	0.672801	0.65682	0.765201	0.533687	0.467356	0.557467	0.777344	0.857425	0.534488	0.499565	0.580749		+	1.9507	0.00741123	-0.519558	+	1.41096	0.00349353	-0.452535	+
775	Q6IAN0	DHRS7B	Dehydrogenase/reductase SDR family member 7B OS=Homo sapiens OX=9606 GN=DHRS7B PE=1 SV=2	4			546.747	663.556	695.537	437.325	404.551	428.283	474.901	510.303	323.127	323.575	394.375	428.059	442.663	233.631	260.582	313.119		0.860639	1.04451	1.09485	0.688397	0.636807	0.674164	0.747546	0.803273	0.508637	0.509342	0.620789	0.673812	0.6968	0.367761	0.410184	0.492883		+	2.1835	0.00354693	-0.578542	+	1.53971	0.00212506	-0.510901	+
776	O43143	DHX15	Pre-mRNA-splicing factor ATP-dependent RNA helicase DHX15 OS=Homo sapiens OX=9606 GN=DHX15 PE=1 SV=2	11			2728.89	3620.51	3307.65	2385.77	2181.26	2265.72	1968.16	2074	1396.32	1274.5	1351.11	2203.12	2156.24	1238.52	1219.91	1229.16		0.84774	1.12473	1.02753	0.741149	0.677617	0.703855	0.611417	0.644296	0.433772	0.395928	0.419728	0.684408	0.669844	0.384751	0.37897	0.381843			1.75289	0.0117088	-0.490242	+	2.71871	0.00112373	-0.59273	+
777	O60231	DHX16	Pre-mRNA-splicing factor ATP-dependent RNA helicase DHX16 OS=Homo sapiens OX=9606 GN=DHX16 PE=1 SV=2	5			648.296	861.081	935.327	574.226	522.697	513.559	553.594	565.783	359.495	319.284	354.23	505.662	521.006	282.684	271.341	302.202		0.795552	1.05667	1.14778	0.704657	0.641424	0.63021	0.679339	0.694296	0.441152	0.391807	0.434691	0.620519	0.639349	0.346894	0.332974	0.370845		+	1.60284	0.00435239	-0.586716	+	2.66786	0.0004814	-0.702706	+
778	Q7Z478	DHX29	ATP-dependent RNA helicase DHX29 OS=Homo sapiens OX=9606 GN=DHX29 PE=1 SV=2	13			3946.07	5071.47	4900.28	2709.27	2521.36	2606.64	4368.56	3956.94	1969.19	1716.16	1824.87	3974.32	3663.89	1495.78	1499.85	1504.55		0.850579	1.09316	1.05626	0.583986	0.543482	0.561864	0.941647	0.852922	0.424461	0.36992	0.393353	0.856669	0.789755	0.322417	0.323294	0.324307		+	2.65916	0.000467532	-0.820462	+	3.00225	0	-1.18091	+
779	Q7L2E3	DHX30	ATP-dependent RNA helicase DHX30 OS=Homo sapiens OX=9606 GN=DHX30 PE=1 SV=1	14			3081.18	3839.84	3910.17	1857.54	1691.69	1729.17	2740.59	2792.04	1457.44	1241.01	1344.9	2974.69	2796.97	1169.75	1132.64	1168.72		0.853419	1.06355	1.08303	0.514497	0.468561	0.478942	0.759083	0.773333	0.403679	0.343732	0.372508	0.823923	0.774699	0.323995	0.313716	0.32371		+	3.02617	0	-1.02994	+	2.9003	0	-1.04042	+
780	Q9H6R0	DHX33	ATP-dependent RNA helicase DHX33 OS=Homo sapiens OX=9606 GN=DHX33 PE=1 SV=2	4			453.275	581.244	599.264	246.995	250.486	248.146	404.534	397.239	155.028	155.101	163.823	271.634	303.655	106.057	118.407	119.005		0.832317	1.0673	1.10039	0.453539	0.45995	0.455653	0.742817	0.729422	0.284667	0.284801	0.300817	0.498782	0.55758	0.194745	0.217422	0.21852		+	3.03182	0	-1.12077	+	4.3924	0	-1.34384	+
781	Q14147	DHX34	Probable ATP-dependent RNA helicase DHX34 OS=Homo sapiens OX=9606 GN=DHX34 PE=1 SV=2	9			1540.71	1973.43	2112.35	1188.36	1022.55	1121.87	865.032	943.519	626.663	525.81	685.637	774.148	821.294	405.889	425.845	489.875		0.821494	1.05222	1.12629	0.633624	0.545216	0.598172	0.461228	0.503077	0.334132	0.280358	0.365576	0.41277	0.437907	0.216417	0.227057	0.261197		+	2.09508	0.000620508	-0.745367	+	1.47421	0.00137741	-0.568844	+
782	Q9H5Z1	DHX35	Probable ATP-dependent RNA helicase DHX35 OS=Homo sapiens OX=9606 GN=DHX35 PE=1 SV=2	2			248.355	291.928	293.647	203.59	193.025	193.791	134.013	156.299	104.902	94.2513	107.53	122.498	138.767	104.383	84.8056	79.2664		0.893438	1.05019	1.05637	0.7324	0.694393	0.697148	0.482102	0.562274	0.377377	0.339062	0.386831	0.440677	0.499204	0.37551	0.305082	0.285155		+	2.4001	0.00863268	-0.494381	+	1.68949	0.00204374	-0.503885	+
783	Q9H2U1	DHX36	ATP-dependent DNA/RNA helicase DHX36 OS=Homo sapiens OX=9606 GN=DHX36 PE=1 SV=2	9			1463.32	1873.95	1892.46	1132.53	928.936	957.162	1301.13	1336.95	803.461	716.796	786.293	1283.54	1315.05	603.56	618.603	739.565		0.839424	1.07498	1.0856	0.649668	0.532878	0.54907	0.746385	0.766933	0.4609	0.411185	0.451052	0.736294	0.75437	0.346228	0.354858	0.424247		+	2.1977	0.000556407	-0.788518	+	2.87012	0.000181818	-0.780331	+
784	Q8IY37	DHX37	Probable ATP-dependent RNA helicase DHX37 OS=Homo sapiens OX=9606 GN=DHX37 PE=1 SV=1	14			1698.25	2214.17	2287.92	1059.69	1014.29	1018.03	1672.91	1515.32	705.296	592.182	693.69	1387.99	1403.04	527.743	560.043	562.907		0.821689	1.07131	1.107	0.512725	0.490759	0.492568	0.809428	0.733179	0.341254	0.286524	0.335638	0.671571	0.678853	0.255346	0.270974	0.272359		+	2.70623	0	-0.991653	+	2.77758	0	-1.26673	+
785	Q92620	DHX38	Pre-mRNA-splicing factor ATP-dependent RNA helicase PRP16 OS=Homo sapiens OX=9606 GN=DHX38 PE=1 SV=2	2			815.556	1030.53	990.502	688.003	589.325	615.698	529.028	597.296	387.262	340.811	396.155	441.932	467.943	254.634	229.146	274.861		0.862539	1.0899	1.04756	0.727638	0.623275	0.651168	0.559505	0.631705	0.409572	0.360445	0.418977	0.467391	0.494901	0.269303	0.242347	0.290695		+	2.02562	0.00388541	-0.579186	+	1.90455	0.00109022	-0.588113	+
786	Q8IX18	DHX40	Probable ATP-dependent RNA helicase DHX40 OS=Homo sapiens OX=9606 GN=DHX40 PE=1 SV=2	4			773.57	960.251	1061.15	594.438	542.634	562.963	586.382	617.585	375.265	351.943	405.791	538.458	577.374	312.443	301.587	342.834		0.830316	1.03069	1.13899	0.638044	0.58244	0.60426	0.629397	0.662889	0.402793	0.37776	0.435558	0.577957	0.619728	0.335363	0.32371	0.367983		+	2.13971	0.000830792	-0.705985	+	2.43127	0.000599434	-0.674576	+
787	Q6P158	DHX57	Putative ATP-dependent RNA helicase DHX57 OS=Homo sapiens OX=9606 GN=DHX57 PE=1 SV=2	16			3415.74	4400.59	4491.39	2431.46	2133.67	2247.5	3716.62	3349.28	1813.64	1580.97	1662.7	3726.04	3638.74	1670.22	1591.17	1620.17		0.832585	1.07264	1.09477	0.592667	0.520081	0.547827	0.905924	0.816385	0.442074	0.385361	0.405282	0.90822	0.886941	0.407115	0.387847	0.394916		+	2.43846	0.000487952	-0.844525	+	2.84396	0	-1.06785	+
788	Q14562	DHX8	ATP-dependent RNA helicase DHX8 OS=Homo sapiens OX=9606 GN=DHX8 PE=1 SV=1	2			357.818	462.799	445.391	319.957	314.261	317.023	261.537	276.141	178.345	164.74	171.782	249.67	260.367	150.409	126.86	140.085		0.847905	1.09667	1.05542	0.758187	0.74469	0.751235	0.619752	0.654358	0.422616	0.390377	0.407064	0.591631	0.61698	0.356417	0.300614	0.331953			1.59686	0.0507925	-0.403418	+	2.95948	0.000585097	-0.64773	+
789	Q08211	DHX9	ATP-dependent RNA helicase A OS=Homo sapiens OX=9606 GN=DHX9 PE=1 SV=4	15			1503.45	1986.81	2006.3	1106.42	939.983	1019.13	1815.15	1798.1	910.19	892.76	889.446	1874.27	1855.73	785.884	811.861	785.378		0.820577	1.08439	1.09503	0.60388	0.513039	0.556237	0.990701	0.981396	0.496778	0.487265	0.485456	1.02297	1.01285	0.428932	0.44311	0.428656		+	2.26364	0.000439024	-0.833108	+	5.20815	0	-1.00943	+
790	O60610	DIAPH1	Protein diaphanous homolog 1 OS=Homo sapiens OX=9606 GN=DIAPH1 PE=1 SV=2	13			2735.71	3520.6	3572.93	2296	2107.19	2137.61	1752.39	2101.28	1477.98	1332.54	1605.64	1804.24	1905.49	1209.74	1200.67	1332.49		0.834971	1.07453	1.0905	0.700766	0.643139	0.652424	0.53485	0.641335	0.451097	0.406707	0.49006	0.550675	0.581578	0.369227	0.366459	0.406692		+	1.93964	0.00392	-0.578134	+	1.1541	0.00813428	-0.386645	+
791	Q9NSV4	DIAPH3	Protein diaphanous homolog 3 OS=Homo sapiens OX=9606 GN=DIAPH3 PE=1 SV=4	1			31.7033	34.6423	44.4157	35.0573	27.6653	29.268	25.0408	22.2304	15.8358	15.0053	22.4606	23.6857	27.9108	14.5861	11.5236	17.5321		0.858693	0.938296	1.20301	0.949537	0.749322	0.792732	0.678237	0.602116	0.428917	0.406423	0.608351	0.641534	0.755972	0.395068	0.31212	0.474862			0.661296	0.345909	-0.260374	+	0.759301	0.00772224	-0.433054	+
792	Q9UPY3	DICER1	Endoribonuclease Dicer OS=Homo sapiens OX=9606 GN=DICER1 PE=1 SV=3	14			2043.06	2601.03	2642.32	1371.53	1153.2	1206.03	2233.28	2034.72	934.527	890.476	945.408	2163.93	2075.83	898.547	861.428	857.036		0.84118	1.07091	1.08791	0.564694	0.474802	0.496553	0.919498	0.837746	0.384768	0.366632	0.389248	0.890945	0.854672	0.369955	0.354672	0.352863		+	2.60756	0.000229426	-0.959975	+	3.55859	0	-1.20734	+
793	Q9BTC0	DIDO1	Death-inducer obliterator 1 OS=Homo sapiens OX=9606 GN=DIDO1 PE=1 SV=5	1			77.3026	83.7453	88.9247	48.8279	44.8915	39.1819	65.0797	74.383	39.3689	39.7772	38.6723	80.4644	71.0226	38.2764	37.2271	32.4077		0.927733	1.00505	1.06721	0.585999	0.538757	0.470234	0.781042	0.892694	0.472479	0.477379	0.464118	0.965679	0.852365	0.459367	0.446774	0.388935		+	2.95057	0.000214452	-0.914925	+	2.82031	0.000205298	-0.825157	+
794	Q68CQ4	DIEXF	Digestive organ expansion factor homolog OS=Homo sapiens OX=9606 GN=DIEXF PE=1 SV=2	1			76.2409	89.997	82.7792	48.3967	42.2886	43.1465	63.2381	64.4459	29.5711	31.7842	34.3898	69.1029	58.5109	33.0254	27.2595	24.5097		0.918502	1.08423	0.997271	0.583053	0.509466	0.519802	0.761852	0.776403	0.356254	0.382916	0.414306	0.832508	0.704902	0.397869	0.328405	0.295277		+	3.20568	0.000209091	-0.895096	+	2.93198	0	-1.00295	+
795	Q9UNQ2	DIMT1	Probable dimethyladenosine transferase OS=Homo sapiens OX=9606 GN=DIMT1 PE=1 SV=1	11			3804.64	4466.09	4272.25	2142.11	1991.24	2166.55	2393.65	2150.5	996.39	888.12	991.987	2778.18	2513.12	874.008	914.458	877.193		0.909985	1.06819	1.02183	0.512345	0.47626	0.51819	0.572507	0.514351	0.238314	0.212418	0.237261	0.664478	0.601082	0.209043	0.218718	0.209805		+	3.6388	0	-0.991223	+	3.07689	0	-1.24461	+
796	Q9Y2L1	DIS3	Exosome complex exonuclease RRP44 OS=Homo sapiens OX=9606 GN=DIS3 PE=1 SV=2	14			3673.32	4403.21	4513.38	2792.15	2399.9	2511.67	2485.58	2782.82	1650.07	1612.06	1935.31	2488.78	2525.12	1359.63	1344.83	1467.13		0.875301	1.04922	1.07548	0.66533	0.571863	0.598496	0.592279	0.663107	0.393189	0.384131	0.461157	0.593042	0.601701	0.323981	0.320454	0.349597		+	2.46283	0.000565044	-0.705617	+	1.79723	0.00115168	-0.607066	+
797	Q8TF46	DIS3L	DIS3-like exonuclease 1 OS=Homo sapiens OX=9606 GN=DIS3L PE=1 SV=2	1			81.9216	95.396	112.941	64.8811	59.2921	72.789	47.9668	56.5069	32.1001	36.9943	45.8234	39.6923	41.56	24.0036	22.3718	24.4582		0.84671	0.985976	1.16731	0.670586	0.61282	0.752319	0.495766	0.584033	0.331774	0.382359	0.473613	0.410244	0.429548	0.248092	0.231226	0.25279		+	1.59433	0.00608239	-0.552104	+	0.923551	0.00489267	-0.458243	+
798	Q8IYB7	DIS3L2	DIS3-like exonuclease 2 OS=Homo sapiens OX=9606 GN=DIS3L2 PE=1 SV=4	5			1886.3	2456.95	2542.41	1511.39	1336.21	1363.9	1406.02	1488.93	933.299	831.223	1020.24	1412.45	1454.15	778.589	803.086	801.446		0.821838	1.07046	1.1077	0.658495	0.582171	0.594235	0.612586	0.648709	0.406627	0.362154	0.444506	0.615388	0.633556	0.339222	0.349895	0.34918		+	2.05119	0.0010924	-0.698955	+	1.95473	0.00108287	-0.645404	+
799	O60832	DKC1	H/ACA ribonucleoprotein complex subunit DKC1 OS=Homo sapiens OX=9606 GN=DKC1 PE=1 SV=3	8			1193.4	1396.08	1419.08	795.436	708.086	767.921	838.005	1005.53	566.962	573.197	641.955	870.503	1024.48	524.796	503.622	569.254		0.893139	1.04482	1.06204	0.595303	0.52993	0.574711	0.627162	0.752537	0.424313	0.42898	0.480438	0.651483	0.766719	0.392757	0.37691	0.426029		+	3.01741	0.000502326	-0.816857	+	1.84402	0.00112865	-0.63017	+
800	O94907	DKK1	Dickkopf-related protein 1 OS=Homo sapiens OX=9606 GN=DKK1 PE=1 SV=1	2			508.119	559.378	556.719	224.782	198.29	200.564	408.781	402.343	184.545	146.561	195.809	389.924	384.913	143.43	125.119	128.747		0.938519	1.0332	1.02829	0.415182	0.366251	0.370451	0.755037	0.743146	0.340863	0.270705	0.361668	0.720207	0.710952	0.264922	0.2311	0.237801		+	4.33166	0	-1.38191	+	2.29077	0	-1.21824	+
801	P10515	DLAT	Dihydrolipoyllysine-residue acetyltransferase component of pyruvate dehydrogenase complex, mitochondrial OS=Homo sapiens OX=9606 GN=DLAT PE=1 SV=3	7			1056.22	1417.22	1393.06	1017.15	898.568	847.065	935.709	1185.3	913.976	841.321	920.614	924.8	979.202	641.725	595.92	678.435		0.819516	1.09961	1.08087	0.789202	0.697195	0.657234	0.726012	0.919669	0.70915	0.652777	0.7143	0.717548	0.759758	0.497912	0.462372	0.526395			1.40591	0.0183373	-0.476485		0.746108	0.105192	-0.240817	+
802	P09622	DLD	Dihydrolipoyl dehydrogenase, mitochondrial OS=Homo sapiens OX=9606 GN=DLD PE=1 SV=2	3			558.802	675.268	730.356	568.408	512.938	498.846	267.161	282.62	210.627	202.31	219.548	314.047	344.617	237.031	211.623	250.292		0.853382	1.03124	1.11537	0.868052	0.78334	0.761819	0.407999	0.431607	0.321662	0.30896	0.335286	0.479601	0.526287	0.361985	0.323183	0.382237			1.12792	0.220379	-0.307364	+	2.254	0.00593128	-0.383022	+
803	Q12959	DLG1	Disks large homolog 1 OS=Homo sapiens OX=9606 GN=DLG1 PE=1 SV=2	3			200.47	273.547	277.769	179.945	157.396	189.295	183.389	186.802	136.584	121.109	133.265	288.989	228.941	150.259	165.87	162.222		0.799975	1.09159	1.10844	0.71807	0.628088	0.755381	0.731813	0.745433	0.545038	0.483285	0.531794	1.15321	0.913588	0.599608	0.661904	0.647346			1.3592	0.0132484	-0.502157	+	2.28539	0.00163377	-0.508078	+
804	Q15398	DLGAP5	Disks large-associated protein 5 OS=Homo sapiens OX=9606 GN=DLGAP5 PE=1 SV=2	12			1645.55	1891.01	2011.96	1279.13	1086.11	1080.92	2140.81	1778.83	1119.9	960.246	1094.34	1583.48	1573.27	632.907	814.27	855.435		0.889724	1.02244	1.08784	0.691606	0.587243	0.584437	1.1575	0.961786	0.605513	0.51919	0.591693	0.856163	0.850643	0.342203	0.440263	0.462521		+	2.37336	0.000892329	-0.686578	+	2.15537	0.000212693	-0.88624	+
805	P36957	DLST	Dihydrolipoyllysine-residue succinyltransferase component of 2-oxoglutarate dehydrogenase complex, mitochondrial OS=Homo sapiens OX=9606 GN=DLST PE=1 SV=4	6			841.917	1082.23	1068.16	785.848	683.22	674.53	695.142	794.065	678.529	550.632	667.032	898.528	895.659	615.25	529.34	676.928		0.844082	1.08501	1.07091	0.787868	0.684977	0.676264	0.696929	0.796106	0.680273	0.552048	0.668747	0.900838	0.897962	0.616832	0.530701	0.678668			1.58938	0.0162092	-0.475395		0.711582	0.108736	-0.239531	+
806	Q9NPF5	DMAP1	DNA methyltransferase 1-associated protein 1 OS=Homo sapiens OX=9606 GN=DMAP1 PE=1 SV=1	2			708.382	852.941	870.641	520.862	528.645	550.75	581.874	596.943	383.943	361.607	437.52	555.396	557.361	277.614	298.503	306.887		0.873839	1.05216	1.074	0.64252	0.652121	0.679389	0.717783	0.736372	0.473621	0.446068	0.539712	0.68512	0.687544	0.342457	0.368225	0.378567		+	2.44395	0.00237875	-0.598151	+	1.93329	0.00108129	-0.584262	+
807	Q8TDJ6	DMXL2	DmX-like protein 2 OS=Homo sapiens OX=9606 GN=DMXL2 PE=1 SV=2	1			206.769	258.657	283.39	191.043	172.349	190.078	155.255	183.525	151.031	138.997	170.504	148.142	158.228	103.151	114.288	132.617		0.828384	1.03626	1.13535	0.76538	0.690486	0.761514	0.622002	0.735261	0.605079	0.556867	0.683094	0.593505	0.633913	0.413256	0.457875	0.531307			1.38325	0.0406353	-0.425342		0.406553	0.354143	-0.142073	+
808	P51530	DNA2	DNA replication ATP-dependent helicase/nuclease DNA2 OS=Homo sapiens OX=9606 GN=DNA2 PE=1 SV=3	3			297.156	393.993	406.515	219.153	188.492	199.77	202.416	212.151	121.838	122.634	142.359	218.284	211.634	94.2733	93.4686	93.2998		0.81215	1.07681	1.11104	0.598962	0.515163	0.545987	0.553218	0.579825	0.332993	0.335168	0.389078	0.596587	0.578412	0.257656	0.255457	0.254996		+	2.23431	0.000452514	-0.842639	+	2.22701	0.000425944	-0.688255	+
809	Q86Y56	DNAAF5	Dynein assembly factor 5, axonemal OS=Homo sapiens OX=9606 GN=DNAAF5 PE=1 SV=4	7			2176.08	2648.22	2910.55	1796.32	1591.21	1768.61	1148.52	1273.86	894.199	822.848	1077.25	1172.65	1228.31	681.913	730.283	813.72		0.844003	1.02713	1.12887	0.696712	0.617159	0.685964	0.445459	0.494073	0.34682	0.319146	0.417817	0.454818	0.476406	0.264483	0.283244	0.315605		+	1.88591	0.00401552	-0.576754	+	1.03299	0.00885349	-0.386252	+
810	Q8IVF4	DNAH10	Dynein heavy chain 10, axonemal OS=Homo sapiens OX=9606 GN=DNAH10 PE=1 SV=4	1			233.54	260.476	268.289	179.956	156.998	158.203	170.56	167.608	106.768	106.646	113.705	175.859	168.168	85.0808	98.6987	110.072		0.919081	1.02509	1.05583	0.708205	0.617855	0.622597	0.671227	0.65961	0.420178	0.419698	0.447478	0.692081	0.661814	0.33483	0.388422	0.433181		+	2.67291	0.00173923	-0.622814	+	3.24437	0.000568873	-0.633484	+
811	Q8TE73	DNAH5	Dynein heavy chain 5, axonemal OS=Homo sapiens OX=9606 GN=DNAH5 PE=1 SV=3	2			248.573	316.194	303.76	231.565	207.412	221.636	201.643	188.602	128.079	102.404	122.387	270.628	248.805	119.67	158.72	150.643		0.858602	1.09217	1.04922	0.799854	0.716427	0.765558	0.6965	0.651455	0.442401	0.353716	0.42274	0.934783	0.859403	0.413355	0.548239	0.52034			1.53322	0.0674263	-0.388434	+	1.94229	0.000469083	-0.735989	+
812	P31689	DNAJA1	DnaJ homolog subfamily A member 1 OS=Homo sapiens OX=9606 GN=DNAJA1 PE=1 SV=2	16			6124.81	7631	6891.3	4805.24	4300.53	4597.23	3892.37	4185.81	2483.57	2271.92	2731.02	4176.4	4304.62	2333.34	2229.22	2520.65		0.889927	1.10878	1.0013	0.698196	0.624862	0.667972	0.565557	0.608193	0.36086	0.330107	0.396814	0.606826	0.625456	0.339031	0.323903	0.366247		+	2.333	0.00309245	-0.587142	+	2.14204	0.000429688	-0.697822	+
813	O60884	DNAJA2	DnaJ homolog subfamily A member 2 OS=Homo sapiens OX=9606 GN=DNAJA2 PE=1 SV=1	10			3819.51	4829.83	4347.42	2944.16	2661.88	2858.99	2316.4	2529.82	1563.36	1451.73	1699.38	2746.5	2738.23	1421.01	1506.65	1630.86		0.881645	1.11485	1.0035	0.679591	0.614433	0.659931	0.534687	0.58395	0.360865	0.335098	0.392262	0.633966	0.632057	0.328007	0.347775	0.376446		+	2.33802	0.00223308	-0.613237	+	2.1218	0.00117863	-0.626316	+
814	Q96EY1	DNAJA3	DnaJ homolog subfamily A member 3, mitochondrial OS=Homo sapiens OX=9606 GN=DNAJA3 PE=1 SV=2	8			1297.87	1592.15	1715.63	1039.23	903.648	1005.55	741.15	733.613	523.63	468.658	520.315	678.313	720.465	375.956	382.185	433.319		0.845399	1.03708	1.11752	0.676927	0.588613	0.654989	0.482766	0.477856	0.341079	0.305272	0.33892	0.441835	0.469292	0.244888	0.248945	0.282253		+	2.03682	0.00197573	-0.636176	+	2.41893	0.00102448	-0.550236	+
815	Q8WW22	DNAJA4	DnaJ homolog subfamily A member 4 OS=Homo sapiens OX=9606 GN=DNAJA4 PE=1 SV=1	2			102.212	133.006	153.295	76.0471	78.451	67.1364	92.1118	99.7256	66.2322	54.3164	68.1547	114.605	115.618	54.6261	64.8465	66.3666		0.789255	1.02704	1.18371	0.587217	0.605779	0.51841	0.711264	0.770056	0.511428	0.419418	0.526274	0.884951	0.892773	0.421809	0.500728	0.512466		+	1.89724	0.000707293	-0.793124	+	1.66324	0.00114476	-0.614764	+
816	P25685	DNAJB1	DnaJ homolog subfamily B member 1 OS=Homo sapiens OX=9606 GN=DNAJB1 PE=1 SV=4	3			760.246	959.67	1083.5	736.474	686.114	701.782	497.347	554.504	418.036	407.641	476.454	580.114	651.273	480.348	400.453	530.655		0.813557	1.02696	1.15948	0.788118	0.734226	0.750993	0.532222	0.593387	0.44735	0.436226	0.509864	0.620793	0.696942	0.514031	0.428534	0.567866			1.18473	0.0875103	-0.385509		1.09182	0.0492475	-0.278304	+
817	Q9UBS4	DNAJB11	DnaJ homolog subfamily B member 11 OS=Homo sapiens OX=9606 GN=DNAJB11 PE=1 SV=1	9			1566.12	1980.83	2090.22	1210.7	1119.07	1136.8	1244.58	1434.06	884.087	816.36	937.958	1417.47	1469.72	845.109	842.065	940.703		0.833461	1.05416	1.11238	0.644313	0.595549	0.604984	0.662343	0.763181	0.470495	0.434452	0.499164	0.754352	0.782158	0.449752	0.448132	0.500625		+	2.19122	0.00109842	-0.691278	+	1.9631	0.00106263	-0.605505	+
818	Q9NXW2	DNAJB12	DnaJ homolog subfamily B member 12 OS=Homo sapiens OX=9606 GN=DNAJB12 PE=1 SV=5	2			103.415	130.757	148.142	92.4794	98.4862	85.7131	81.235	86.0368	66.7521	66.3277	70.0301	89.9938	107.612	65.753	72.9729	86.0639		0.811493	1.02604	1.16246	0.725682	0.772817	0.672587	0.637447	0.675127	0.523801	0.52047	0.549523	0.706177	0.844426	0.515961	0.572615	0.675339			1.30525	0.0284485	-0.453176		2.19791	0.0203043	-0.304728	+
819	Q8TBM8	DNAJB14	DnaJ homolog subfamily B member 14 OS=Homo sapiens OX=9606 GN=DNAJB14 PE=1 SV=1	1			32.2017	37.4793	41.1454	28.6133	21.9452	23.2844	22.2077	28.2925	17.5381	19.3875	19.9153	29.9093	29.2579	15.4193	20.9873	18.6295		0.871679	1.01454	1.11378	0.774544	0.594043	0.630294	0.601148	0.76586	0.474745	0.524807	0.539094	0.809626	0.791993	0.417391	0.568113	0.504289		+	1.71505	0.00398444	-0.588002	+	1.14225	0.00730732	-0.405908	+
820	O75190	DNAJB6	DnaJ homolog subfamily B member 6 OS=Homo sapiens OX=9606 GN=DNAJB6 PE=1 SV=2	6			797.036	940.158	958.65	586.779	508.497	553.203	869.521	842.207	465.98	440.084	508.982	754.101	797.93	422.317	378.407	406.31		0.886961	1.04623	1.06681	0.652982	0.565868	0.615618	0.967624	0.937228	0.518554	0.489736	0.566407	0.839182	0.887956	0.469965	0.4211	0.452152		+	2.6184	0.000592469	-0.707229	+	2.75686	0.000223022	-0.861977	+
821	Q96KC8	DNAJC1	DnaJ homolog subfamily C member 1 OS=Homo sapiens OX=9606 GN=DNAJC1 PE=1 SV=1	1			228.17	267.323	253.082	136.198	120.136	127.325	238.69	221.881	115.561	112.575	123.15	258.48	231.064	109.705	112.186	113.39		0.914417	1.07133	1.01426	0.545829	0.481459	0.51027	0.956577	0.889214	0.463124	0.451157	0.493538	1.03589	0.926015	0.439655	0.449598	0.454423		+	3.46122	0	-0.963136	+	3.22697	0	-0.97581	+
822	Q9NVH1	DNAJC11	DnaJ homolog subfamily C member 11 OS=Homo sapiens OX=9606 GN=DNAJC11 PE=1 SV=2	1			246.376	321.703	343.323	253.915	223.945	248.04	181.86	209.897	162.58	135.419	157.959	185.623	193.959	115.478	139.554	163.772		0.810979	1.05893	1.13009	0.835795	0.737145	0.816456	0.598616	0.690904	0.535154	0.44575	0.519943	0.611003	0.638442	0.380111	0.45936	0.539077			0.943643	0.218502	-0.316032		1.17012	0.0105455	-0.366878	+
823	O75165	DNAJC13	DnaJ homolog subfamily C member 13 OS=Homo sapiens OX=9606 GN=DNAJC13 PE=1 SV=5	13			1584.31	2094.65	2067.18	1333.2	1266.38	1305.86	1575.32	1606.35	1115.28	979.284	1213.5	2438.35	2184.38	1221.3	1397.22	1425.03		0.827152	1.0936	1.07925	0.69605	0.661164	0.681776	0.822458	0.838659	0.582276	0.511274	0.633556	1.27304	1.14044	0.637628	0.729474	0.743993		+	1.8299	0.00576109	-0.545875	+	1.70919	0.00146825	-0.534256	+
824	Q9Y2G8	DNAJC16	DnaJ homolog subfamily C member 16 OS=Homo sapiens OX=9606 GN=DNAJC16 PE=2 SV=3	9			914.739	1135.89	1143.22	736.156	645.855	705.105	873.748	881.095	580.898	528.403	635.111	976.794	968.122	521.069	569.557	585.001		0.859219	1.06695	1.07383	0.691475	0.606655	0.662309	0.820716	0.827617	0.545641	0.496332	0.596563	0.917508	0.909362	0.489443	0.534988	0.549495		+	2.15428	0.00256164	-0.608361	+	2.04003	0.00104891	-0.597613	+
825	Q96DA6	DNAJC19	Mitochondrial import inner membrane translocase subunit TIM14 OS=Homo sapiens OX=9606 GN=DNAJC19 PE=1 SV=3	3			870.005	1054.02	1055.29	635.219	610.658	614.497	633.78	656.837	379.179	345.627	401.571	683.915	715.617	310.269	316.149	341.336		0.876045	1.06134	1.06262	0.639629	0.614898	0.618763	0.63818	0.661397	0.381812	0.348027	0.404359	0.688663	0.720585	0.312423	0.318344	0.343706		+	2.69386	0.000899291	-0.673799	+	2.58952	0.000176136	-0.783842	+
826	Q5F1R6	DNAJC21	DnaJ homolog subfamily C member 21 OS=Homo sapiens OX=9606 GN=DNAJC21 PE=1 SV=2	4			306.046	374.655	353.445	319.853	298.512	294.499	227.151	251.632	155.324	131.375	139.297	323.891	329.334	193.412	198.754	197.804		0.887822	1.08685	1.02532	0.927876	0.865967	0.854325	0.658952	0.72997	0.450586	0.381112	0.404093	0.93959	0.95538	0.561077	0.576574	0.573818			0.867754	0.476286	-0.175779	+	2.23674	0.000532688	-0.755105	+
827	Q9H1X3	DNAJC25	DnaJ homolog subfamily C member 25 OS=Homo sapiens OX=9606 GN=DNAJC25 PE=1 SV=1	2			390.923	452.461	499.425	308.786	280.045	268.963	331.812	331.815	184.909	176.126	224.698	315.928	301.916	144.633	157.817	177.753		0.87337	1.01085	1.11578	0.689866	0.625655	0.600896	0.741309	0.741315	0.413109	0.393487	0.502003	0.705822	0.674517	0.323128	0.352583	0.397122		+	2.24974	0.0016982	-0.641757	+	1.9443	0.000525687	-0.773236	+
828	Q13217	DNAJC3	DnaJ homolog subfamily C member 3 OS=Homo sapiens OX=9606 GN=DNAJC3 PE=1 SV=1	5			591.046	789.293	765.432	453.678	394.947	388.781	532.56	604.181	364.571	326.211	427.666	509.339	572.696	293.94	284.612	319.322		0.826341	1.10351	1.07015	0.634287	0.552175	0.543554	0.744572	0.844705	0.509706	0.456075	0.597919	0.712106	0.800686	0.410957	0.397916	0.446444		+	2.19712	0.000547414	-0.78594	+	1.49737	0.00108402	-0.614466	+
829	Q96LL9	DNAJC30	DnaJ homolog subfamily C member 30, mitochondrial OS=Homo sapiens OX=9606 GN=DNAJC30 PE=1 SV=3	1			196.261	285.268	277.915	187.861	177.63	194.089	157.779	187.613	130.218	120.485	131.964	153.125	161.435	74.8942	96.9018	103.585		0.775282	1.12688	1.09784	0.742099	0.701684	0.766702	0.623268	0.74112	0.514395	0.475947	0.521292	0.604883	0.63771	0.295851	0.382787	0.409188			1.11435	0.0543857	-0.421492	+	1.56482	0.00407167	-0.432857	+
830	Q99615	DNAJC7	DnaJ homolog subfamily C member 7 OS=Homo sapiens OX=9606 GN=DNAJC7 PE=1 SV=2	1			58.1676	69.9341	94.2673	46.9287	46.2443	46.956	39.2948	48.1485	24.9451	18.4727	24.6742	36.3	39.0927	21.5234	27.8835	27.3982		0.784744	0.943487	1.27177	0.633119	0.623886	0.633488	0.53013	0.649576	0.336537	0.249217	0.332882	0.489727	0.527403	0.290374	0.376179	0.369632		+	1.45711	0.00319179	-0.637305	+	1.67872	0.000214533	-0.951863	+
831	Q8WXX5	DNAJC9	DnaJ homolog subfamily C member 9 OS=Homo sapiens OX=9606 GN=DNAJC9 PE=1 SV=1	1			133.455	136.58	146.532	95.0507	118.424	86.2831	98.8036	108.623	63.9854	59.9884	58.4783	100.361	120.235	53.7291	48.7804	62.8985		0.961106	0.983611	1.05528	0.684529	0.852857	0.621387	0.711556	0.782273	0.460805	0.43202	0.421144	0.722772	0.865899	0.386942	0.351303	0.452978			1.5832	0.0138672	-0.486478	+	2.76915	0.000171745	-0.769468	+
832	O00429	DNM1L	Dynamin-1-like protein OS=Homo sapiens OX=9606 GN=DNM1L PE=1 SV=2	9			1104.24	1474.51	1425.25	1009.83	927.395	884.995	909.971	965.873	732.239	627.164	758.268	1241	1236.77	892.602	836.935	870.247		0.827353	1.10478	1.06787	0.756616	0.694851	0.663083	0.681796	0.723681	0.548631	0.469903	0.568133	0.92982	0.926651	0.668783	0.627074	0.652033			1.58943	0.0122264	-0.495132	+	1.45188	0.00538017	-0.414205	+
833	P50570	DNM2	Dynamin-2 OS=Homo sapiens OX=9606 GN=DNM2 PE=1 SV=2	9			2449.27	3119.9	3143.27	2108.71	1857.18	1853.72	2249.24	2622.01	1759.12	1589.57	1813.39	2235.7	2307.78	1519.59	1429.64	1562.85		0.84337	1.07429	1.08234	0.726103	0.639492	0.638301	0.774493	0.90285	0.605727	0.547345	0.624414	0.76983	0.79465	0.523248	0.492275	0.538144		+	1.90405	0.00401206	-0.575407	+	1.68905	0.00209977	-0.499329	+
834	Q6XZF7	DNMBP	Dynamin-binding protein OS=Homo sapiens OX=9606 GN=DNMBP PE=1 SV=1	2			207.309	289.334	318.636	202.11	150.14	174.351	187.223	208.029	136.555	134.586	174.527	191.364	203.826	108.702	105.953	130.204		0.762839	1.06467	1.17249	0.743709	0.552473	0.641563	0.688929	0.765489	0.502484	0.495239	0.642211	0.704166	0.750023	0.399993	0.389878	0.479115		+	1.2872	0.00414304	-0.617661	+	1.06371	0.00646503	-0.420284	+
835	P26358	DNMT1	DNA (cytosine-5)-methyltransferase 1 OS=Homo sapiens OX=9606 GN=DNMT1 PE=1 SV=2	12			2142.7	2622.63	2666.61	1383.16	1286.42	1272.44	2405.45	2355.22	1183.27	1060.91	1132.83	1819.88	1718.91	794.914	753.74	778.907		0.864929	1.05866	1.07641	0.558331	0.51928	0.513637	0.970991	0.950715	0.477642	0.42825	0.457282	0.734618	0.693861	0.320877	0.304257	0.314416		+	2.95832	0.000210526	-0.908841	+	3.42569	0	-1.08175	+
836	Q9H147	DNTTIP1	Deoxynucleotidyltransferase terminal-interacting protein 1 OS=Homo sapiens OX=9606 GN=DNTTIP1 PE=1 SV=2	4			776.552	928.498	968.028	618.842	551.245	542.879	519.136	597.254	393.03	345.612	381.484	585.546	600.096	290.45	264.025	340.473		0.871526	1.04205	1.08642	0.694527	0.618663	0.609274	0.582627	0.670299	0.441098	0.387881	0.42814	0.657159	0.673489	0.325973	0.296316	0.382113		+	2.2965	0.00174411	-0.638045	+	1.93563	0.00105991	-0.578757	+
837	Q14185	DOCK1	Dedicator of cytokinesis protein 1 OS=Homo sapiens OX=9606 GN=DOCK1 PE=1 SV=2	2			522.55	697.008	695.47	433.774	437.353	422.706	319.001	383.653	284.527	261.154	302.32	287.664	351.756	205.299	205.221	240.592		0.818604	1.0919	1.08949	0.679532	0.685138	0.662193	0.499733	0.601014	0.445728	0.409113	0.473601	0.450642	0.551046	0.321613	0.32149	0.376901		+	1.78693	0.00543838	-0.553112		1.0356	0.028158	-0.310167	+
838	Q9H7D0	DOCK5	Dedicator of cytokinesis protein 5 OS=Homo sapiens OX=9606 GN=DOCK5 PE=1 SV=3	5			378.326	474.442	517.339	349.589	326.338	334.302	505.731	585.554	397.247	361.159	468.565	583.028	596.972	353.506	369.318	411.249		0.828386	1.03884	1.13277	0.765464	0.714553	0.731991	1.10735	1.28213	0.869816	0.790797	1.02597	1.2766	1.30714	0.77404	0.808662	0.900475			1.44423	0.0371262	-0.427931	+	1.09256	0.00620463	-0.420446	+
839	Q96N67	DOCK7	Dedicator of cytokinesis protein 7 OS=Homo sapiens OX=9606 GN=DOCK7 PE=1 SV=4	7			1320.55	1589.37	1704.04	985.688	958.175	969.892	962.779	1065.78	752.68	727.501	851.112	970.652	1061.73	562.284	618.612	691.376		0.858623	1.03341	1.10797	0.640895	0.623006	0.630624	0.626	0.692971	0.489393	0.473022	0.553394	0.631119	0.690338	0.365597	0.402222	0.449533		+	2.39316	0.00153941	-0.655031	+	1.46512	0.00758316	-0.385743	+
840	Q9BU89	DOHH	Deoxyhypusine hydroxylase OS=Homo sapiens OX=9606 GN=DOHH PE=1 SV=1	2			241.245	286.439	309.185	186.382	158.192	166.16	136.991	158.602	117.039	112.301	123.684	128.034	130.38	73.1675	68.0485	83.2708		0.864813	1.02682	1.10836	0.66814	0.567085	0.595649	0.491084	0.568555	0.41956	0.402576	0.443381	0.458975	0.467385	0.26229	0.24394	0.298508		+	2.29568	0.000619675	-0.708228		1.38892	0.0183631	-0.326073	+
841	Q9Y3R5	DOP1B	Protein dopey-2 OS=Homo sapiens OX=9606 GN=DOP1B PE=1 SV=5	1			148.536	188.656	219.3	124.471	108.143	129.492	124.36	157.839	108.046	97.1889	127.481	149.411	129.653	77.9577	103.231	100.786		0.800745	1.01703	1.18223	0.671012	0.58299	0.69808	0.670414	0.850896	0.582467	0.523937	0.687239	0.805462	0.698948	0.420263	0.556509	0.543329		+	1.53825	0.00393884	-0.605955		0.759453	0.0209616	-0.346224	+
842	Q8TEK3	DOT1L	Histone-lysine N-methyltransferase, H3 lysine-79 specific OS=Homo sapiens OX=9606 GN=DOT1L PE=1 SV=3	4			878.64	1156.79	1118.73	507.559	419.677	448.851	751.411	796.837	330.82	275.448	298.184	645.982	645.356	227.892	218.736	223.527		0.835696	1.10025	1.06405	0.482752	0.399165	0.426913	0.714686	0.757891	0.314651	0.261985	0.28361	0.61441	0.613814	0.216754	0.208045	0.212602		+	2.88107	0	-1.19068	+	3.02254	0	-1.36393	+
843	Q92782	DPF1	Zinc finger protein neuro-d4 OS=Homo sapiens OX=9606 GN=DPF1 PE=1 SV=2	2			150.657	169.012	187.16	96.8517	85.6736	83.967	118.869	109.841	61.7682	52.0293	63.5621	103.853	108.934	37.7887	48.1215	52.2627		0.891762	1.00041	1.10783	0.57328	0.507115	0.497014	0.703604	0.650166	0.365616	0.30797	0.376234	0.614722	0.644797	0.223677	0.284839	0.309351		+	2.94542	0.000220096	-0.924666	+	2.34424	0.000267241	-0.956204	+
844	Q92785	DPF2	Zinc finger protein ubi-d4 OS=Homo sapiens OX=9606 GN=DPF2 PE=1 SV=2	7			1302.48	1563.33	1691.03	1015.69	914.402	911.936	757.528	846.895	535.18	543.348	632.029	686.543	732.762	410.371	405.92	432.854		0.857489	1.02922	1.11329	0.66868	0.601997	0.600374	0.498719	0.557554	0.352336	0.357714	0.416097	0.451986	0.482415	0.270168	0.267238	0.28497		+	2.27195	0.00138492	-0.674474	+	1.62894	0.00229031	-0.494444	+
845	Q9BQC3	DPH2	2-(3-amino-3-carboxypropyl)histidine synthase subunit 2 OS=Homo sapiens OX=9606 GN=DPH2 PE=1 SV=1	3			489.248	604.505	650.72	380.219	318.693	317.633	304.569	386.135	235.817	235.826	286.186	263.885	273.739	166.177	158.505	159.525		0.841368	1.03958	1.11905	0.653869	0.548062	0.546239	0.523773	0.664043	0.405539	0.405554	0.492159	0.453808	0.470754	0.285777	0.272584	0.274338		+	2.17225	0.000624746	-0.773999	+	1.0765	0.00474228	-0.447156	+
846	O60762	DPM1	Dolichol-phosphate mannosyltransferase subunit 1 OS=Homo sapiens OX=9606 GN=DPM1 PE=1 SV=1	11			1561.4	2067.77	2056.21	1177.22	1082.51	1162.5	955.881	965.232	560.915	528.786	659.342	995.709	991.537	510.378	561.03	551.415		0.823903	1.0911	1.085	0.621183	0.571207	0.613415	0.504389	0.509323	0.295978	0.279024	0.347914	0.525405	0.523204	0.269311	0.296038	0.290965		+	2.18329	0.000564143	-0.721303	+	2.01434	0.000461216	-0.726689	+
847	Q9NY33	DPP3	Dipeptidyl peptidase 3 OS=Homo sapiens OX=9606 GN=DPP3 PE=1 SV=2	3			791.132	914.833	951.056	648.399	616.081	574.026	566.711	600.416	433.567	389.796	423.846	755.669	756.549	545.25	551.225	554.972		0.893255	1.03292	1.07382	0.732097	0.695607	0.648124	0.639864	0.67792	0.489534	0.440112	0.478558	0.853214	0.854207	0.615633	0.622379	0.62661		+	2.28252	0.00573168	-0.528613	+	2.26268	0.00176886	-0.490116	+
848	Q86TI2	DPP9	Dipeptidyl peptidase 9 OS=Homo sapiens OX=9606 GN=DPP9 PE=1 SV=3	1			179.804	208.759	219.995	129.867	128.519	120.953	155.551	151.002	113.837	96.4799	108.886	174.58	175.457	117.956	111.565	108.595		0.886377	1.02912	1.08451	0.640204	0.633558	0.59626	0.766818	0.744392	0.561181	0.475616	0.536774	0.860625	0.864948	0.581486	0.54998	0.535339		+	2.72635	0.000835036	-0.677424	+	1.96428	0.00150238	-0.529948	+
849	Q16555	DPYSL2	Dihydropyrimidinase-related protein 2 OS=Homo sapiens OX=9606 GN=DPYSL2 PE=1 SV=1	7			795.207	1022.19	1002.01	731.633	680.479	674.703	1584.02	1848.12	1326.13	1170.86	1430.76	2037.04	2018.55	1505.87	1505.72	1606.02		0.846143	1.08766	1.06619	0.778497	0.724066	0.71792	1.68548	1.9665	1.41107	1.24586	1.52241	2.16752	2.14785	1.60233	1.60217	1.70889			1.60017	0.0346445	-0.425941	+	1.18907	0.00794138	-0.390967	+
850	Q14195	DPYSL3	Dihydropyrimidinase-related protein 3 OS=Homo sapiens OX=9606 GN=DPYSL3 PE=1 SV=1	1			437.991	550.724	524.84	341.631	293.179	291.725	301.368	306.499	203.582	190.522	219.19	348.811	333.8	213.732	211.923	229.492		0.868137	1.09158	1.04028	0.677143	0.581107	0.578225	0.597338	0.607508	0.403518	0.377631	0.434454	0.691374	0.661621	0.423636	0.42005	0.454873		+	2.3089	0.000695253	-0.705093	+	2.31946	0.00110853	-0.574454	+
851	Q9Y295	DRG1	Developmentally-regulated GTP-binding protein 1 OS=Homo sapiens OX=9606 GN=DRG1 PE=1 SV=1	3			1817.19	2171.73	1610.53	1307.06	1174.43	1178.93	1405.67	1384.59	768.198	711.974	792.239	1366.59	1303.55	747.919	728.091	762.918		0.97359	1.16354	0.862869	0.700279	0.629221	0.631632	0.753111	0.741817	0.411575	0.381452	0.424455	0.732174	0.698399	0.40071	0.390087	0.408746		+	1.95628	0.00308954	-0.604108	+	3.1734	0.000247505	-0.88254	+
852	P55039	DRG2	Developmentally-regulated GTP-binding protein 2 OS=Homo sapiens OX=9606 GN=DRG2 PE=1 SV=1	2			616.004	749.428	763.211	487.909	392.759	395.283	400.146	430.006	276.269	252.559	300.372	339.005	345.008	190.714	177.918	203.618		0.868164	1.05621	1.07563	0.687634	0.553534	0.557092	0.563945	0.606028	0.389359	0.355944	0.423329	0.477776	0.486237	0.268783	0.250748	0.286969		+	2.1801	0.000618881	-0.739223	+	1.99931	0.00111937	-0.589293	+
853	Q02487	DSC2	Desmocollin-2 OS=Homo sapiens OX=9606 GN=DSC2 PE=1 SV=1	3			295.642	390.824	421.268	280.613	275.333	268.142	196.999	293.706	199.066	176.437	207.266	327.165	371.281	263.643	257.878	303.096		0.800667	1.05844	1.14089	0.759965	0.745665	0.726191	0.533519	0.795424	0.539117	0.477832	0.561324	0.886039	1.00551	0.714006	0.698393	0.820854			1.23213	0.0579242	-0.410784		0.563545	0.0475884	-0.311653
854	Q9BVC3	DSCC1	Sister chromatid cohesion protein DCC1 OS=Homo sapiens OX=9606 GN=DSCC1 PE=1 SV=2	1			98.2029	116.076	146.853	77.9704	62.0477	57.5263	70.2834	73.183	46.1573	42.1222	53.7149	59.6678	65.2914	37.394	31.3946	39.286		0.815793	0.964268	1.21994	0.647717	0.515444	0.477883	0.583859	0.607947	0.383439	0.349918	0.446221	0.495673	0.54239	0.31064	0.260802	0.326357		+	1.80477	0.000408575	-0.862846	+	1.69749	0.00111864	-0.606859	+
855	O14972	DSCR3	Down syndrome critical region protein 3 OS=Homo sapiens OX=9606 GN=DSCR3 PE=2 SV=1	2			554.133	679.923	754.778	477.992	425.704	451.44	386.665	439.503	296.364	250.051	315.075	457.172	462.996	236.59	282.84	290.217		0.835866	1.02561	1.13852	0.721013	0.642141	0.680962	0.583254	0.662956	0.447042	0.377182	0.475266	0.689608	0.698393	0.356877	0.426642	0.43777		+	1.75391	0.00609913	-0.543428	+	1.44017	0.00177991	-0.528383	+
856	Q14126	DSG2	Desmoglein-2 OS=Homo sapiens OX=9606 GN=DSG2 PE=1 SV=2	14			1922.37	2212.52	2332.57	1904.89	1730.25	1960.4	907.067	1328.07	946.605	844.906	960.966	1494.26	1878.32	1827	1497.37	1892.9		0.891712	1.0263	1.08199	0.883603	0.802595	0.909352	0.420753	0.616039	0.439093	0.391919	0.445754	0.693128	0.871279	0.847473	0.694571	0.878042			0.97089	0.412606	-0.20622		0.497155	0.100465	-0.260888
857	Q03001	DST	Dystonin OS=Homo sapiens OX=9606 GN=DST PE=1 SV=4	1			84.36	113.352	118.538	75.0045	62.6293	73.1403	185.934	147.262	94.1685	82.9854	95.2004	208.272	187.765	66.0051	89.8868	98.1503		0.800253	1.07528	1.12447	0.711505	0.594112	0.693821	1.7638	1.39695	0.893298	0.787213	0.903087	1.9757	1.78117	0.626135	0.852681	0.93107		+	1.52256	0.00517379	-0.574031	+	1.99102	0.0001984	-0.868826	+
858	P60981	DSTN	Destrin OS=Homo sapiens OX=9606 GN=DSTN PE=1 SV=3	1			189.572	230.187	260.798	138.005	140.467	117.899	150.917	193.419	108.212	83.4122	135.007	132.266	147.141	81.9688	75.1669	85.4594		0.835663	1.0147	1.14964	0.608347	0.6192	0.519717	0.665265	0.852621	0.477015	0.367694	0.595132	0.583049	0.64862	0.361331	0.331347	0.376718		+	2.10843	0.000697537	-0.771994	+	0.988682	0.0010632	-0.677667	+
859	Q9NZJ0	DTL	Denticleless protein homolog OS=Homo sapiens OX=9606 GN=DTL PE=1 SV=3	2			197.386	244.215	319.551	172.869	149.866	157.361	145.391	173.614	117.166	95.8368	119.803	126.625	141.973	69.4178	77.0273	85.4156		0.777976	0.962548	1.25948	0.681345	0.590681	0.620222	0.573043	0.684281	0.461797	0.377731	0.472191	0.499079	0.559572	0.273603	0.303595	0.336657		+	1.41752	0.00321521	-0.639262	+	1.31422	0.00211917	-0.525287	+
860	Q8N5C7	DTWD1	DTW domain-containing protein 1 OS=Homo sapiens OX=9606 GN=DTWD1 PE=1 SV=1	1			286.557	355.148	381.089	216.424	199.856	187.368	196.289	229.326	147.692	133.962	154.391	174.371	178.787	90.3543	88.2373	99.8995		0.840512	1.0417	1.11779	0.634802	0.586206	0.549577	0.575744	0.672646	0.433202	0.39293	0.452851	0.511455	0.524408	0.265022	0.258813	0.293019		+	2.26604	0.000674286	-0.752892	+	1.76208	0.00136687	-0.548188	+
861	Q8NBA8	DTWD2	DTW domain-containing protein 2 OS=Homo sapiens OX=9606 GN=DTWD2 PE=1 SV=1	1			48.2539	49.8674	60.7948	39.1019	34.3867	37.4395	29.2401	40.6434	27.1294	18.5668	23.9357	43.7054	41.9999	17.9113	19.3577	20.1094		0.910932	0.941391	1.14768	0.738161	0.649148	0.706779	0.551991	0.767261	0.512146	0.350502	0.451855	0.825066	0.792869	0.338127	0.365432	0.379623		+	1.92095	0.00827235	-0.513013	+	0.920243	0.00178937	-0.588236	+
862	Q6P1R4	DUS1L	tRNA-dihydrouridine(16/17) synthase [NAD(P)(+)]-like OS=Homo sapiens OX=9606 GN=DUS1L PE=1 SV=1	6			1571.83	1980.17	2062.58	1264.09	1187.66	1330.03	764.604	829.267	531.19	500.674	615.38	690.685	677.392	397.644	409.073	450.207		0.839865	1.05805	1.10208	0.675433	0.634594	0.710666	0.408546	0.443097	0.283827	0.267522	0.328812	0.369049	0.361946	0.21247	0.218577	0.240556		+	1.89508	0.00477879	-0.561613	+	1.6703	0.00149291	-0.541749	+
863	Q9NX74	DUS2	tRNA-dihydrouridine(20) synthase [NAD(P)+]-like OS=Homo sapiens OX=9606 GN=DUS2 PE=1 SV=1	5			569.113	754.949	741.756	395.696	353.45	352.628	501.577	479.864	251.396	221.416	255.618	429.015	434.004	182.527	217.829	195.69		0.826471	1.09634	1.07718	0.574633	0.513283	0.51209	0.728395	0.696863	0.36508	0.321542	0.371211	0.62302	0.630265	0.265067	0.316333	0.284183		+	2.48459	0.000176583	-0.897331	+	2.86079	0	-1.01764	+
864	Q96G46	DUS3L	tRNA-dihydrouridine(47) synthase [NAD(P)(+)]-like OS=Homo sapiens OX=9606 GN=DUS3L PE=1 SV=2	4			640.704	838.179	848.06	481.821	448.917	467.087	476.36	483.28	327.185	319.331	404.106	434.779	430.714	222.049	240.993	265.122		0.826025	1.08062	1.09336	0.621185	0.578764	0.60219	0.614145	0.623066	0.421822	0.411696	0.520992	0.560537	0.555296	0.286276	0.310699	0.341807		+	2.23004	0.000580804	-0.724148	+	1.34504	0.00341763	-0.462491	+
865	O75319	DUSP11	RNA/RNP complex-1-interacting phosphatase OS=Homo sapiens OX=9606 GN=DUSP11 PE=1 SV=2	2			232.507	332.698	310.568	195.146	189.714	177.953	195.066	195.219	134.15	112.119	126.004	184.495	170.643	106.978	92.3599	114.958		0.796463	1.13967	1.06386	0.668481	0.649874	0.609586	0.668207	0.668732	0.459537	0.384069	0.431632	0.631996	0.584545	0.366458	0.316383	0.393794		+	1.72352	0.00298951	-0.622173	+	2.1706	0.000716007	-0.657079	+
866	Q9UNI6	DUSP12	Dual specificity protein phosphatase 12 OS=Homo sapiens OX=9606 GN=DUSP12 PE=1 SV=1	14			3121.84	3908.42	4072.13	3069.75	2881.3	2912.71	1736.19	1823.03	1397.28	1232.42	1535.88	2490.69	2406.52	1577.57	1699.95	1659.02		0.843559	1.0561	1.10034	0.829484	0.778562	0.787049	0.46914	0.492605	0.377562	0.333015	0.415013	0.673015	0.650271	0.426278	0.459347	0.448287			1.21202	0.197328	-0.315854		1.23502	0.0105247	-0.363405	+
867	Q13115	DUSP4	Dual specificity protein phosphatase 4 OS=Homo sapiens OX=9606 GN=DUSP4 PE=1 SV=1	4			818.317	1073.09	1234.32	634.838	588.556	606.845	791.426	919.209	534.192	475.864	628.739	1029.38	966.577	486.22	487.857	520.142		0.785402	1.02993	1.18467	0.609303	0.564882	0.582436	0.759592	0.882235	0.512705	0.456723	0.603449	0.987975	0.927698	0.466663	0.468234	0.49922		+	1.88168	0.000586093	-0.752369	+	1.50128	0.0011076	-0.652301	+
868	Q16828	DUSP6	Dual specificity protein phosphatase 6 OS=Homo sapiens OX=9606 GN=DUSP6 PE=1 SV=2	3			544.908	669.942	739.664	345.342	292.933	273.493	543.667	584.707	287.756	239.128	294.506	590.207	634.759	223.018	205.895	204.481		0.836384	1.0283	1.13532	0.530068	0.449625	0.419787	0.834479	0.897472	0.441679	0.36704	0.45204	0.905914	0.974297	0.342312	0.31603	0.31386		+	2.58518	0	-1.09561	+	2.41087	0	-1.04824	+
869	Q99956	DUSP9	Dual specificity protein phosphatase 9 OS=Homo sapiens OX=9606 GN=DUSP9 PE=1 SV=1	3			608.28	810.364	850.023	533.776	472.955	517.91	258.096	319.654	200.585	189.511	240.922	275.504	287.045	151.739	167.084	192.363		0.804367	1.07159	1.12404	0.705845	0.625418	0.684865	0.341296	0.422698	0.265246	0.250602	0.318586	0.364316	0.379578	0.200654	0.220946	0.254374		+	1.60731	0.0056978	-0.560056	+	1.08703	0.00408778	-0.457189	+
870	P33316	DUT	Deoxyuridine 5'-triphosphate nucleotidohydrolase, mitochondrial OS=Homo sapiens OX=9606 GN=DUT PE=1 SV=4	2			336.77	386.418	408.441	284.25	287.765	280.651	133.931	157.872	113.068	112.388	131.338	178.626	177.57	121.311	118.509	128.439		0.892793	1.02441	1.0828	0.75356	0.762878	0.744019	0.355057	0.418526	0.299748	0.297946	0.348183	0.473546	0.470746	0.321601	0.314173	0.340498			2.07604	0.0402554	-0.403742		0.964797	0.0395354	-0.293802	+
871	Q14204	DYNC1H1	Cytoplasmic dynein 1 heavy chain 1 OS=Homo sapiens OX=9606 GN=DYNC1H1 PE=1 SV=5	19			2040.27	2559.79	2636.79	1892.86	1811.73	1897.82	1478.13	1589.14	1370.78	1204.08	1426.96	1764.47	1714.65	1014.91	1227.94	1324.27		0.845784	1.06115	1.09307	0.784676	0.751044	0.786732	0.612751	0.65877	0.56825	0.499145	0.591539	0.731452	0.7108	0.420726	0.509036	0.54897			1.41229	0.106909	-0.36043		0.847346	0.160538	-0.204052	+
872	Q13409	DYNC1I2	Cytoplasmic dynein 1 intermediate chain 2 OS=Homo sapiens OX=9606 GN=DYNC1I2 PE=1 SV=3	7			531.267	633.78	659.425	461.622	460.336	475.941	411.796	433.049	378.176	343.831	425.616	564.217	539.775	307.977	401.942	434.28		0.873568	1.04213	1.0843	0.75905	0.756936	0.782595	0.677121	0.712067	0.621839	0.565365	0.699845	0.927748	0.887558	0.50641	0.660918	0.714092			1.7546	0.0719134	-0.378149		0.524972	0.318457	-0.148127	+
873	Q9Y6G9	DYNC1LI1	Cytoplasmic dynein 1 light intermediate chain 1 OS=Homo sapiens OX=9606 GN=DYNC1LI1 PE=1 SV=3	12			2715.87	3437.23	3327.66	2238.26	2233.28	2187.78	1899.79	2173.07	1670.83	1480.68	1947.14	2262.8	2262.32	1187.13	1423.87	1600.47		0.859384	1.08764	1.05297	0.708253	0.706678	0.69228	0.601151	0.687625	0.528701	0.468532	0.616134	0.716019	0.715867	0.375644	0.450556	0.506437		+	2.03053	0.00911734	-0.502053		0.692482	0.0756502	-0.266727	+
874	O43237	DYNC1LI2	Cytoplasmic dynein 1 light intermediate chain 2 OS=Homo sapiens OX=9606 GN=DYNC1LI2 PE=1 SV=1	4			348.393	409.039	513.562	286.95	241.637	255.228	220.214	257.877	188.08	161.78	193.837	283.772	298.447	174.635	186.551	214.365		0.822332	0.965478	1.21219	0.677305	0.57035	0.602429	0.519784	0.608682	0.443936	0.381859	0.457525	0.669803	0.704442	0.412201	0.440327	0.505978		+	1.7311	0.00156977	-0.682688	+	1.22954	0.00744244	-0.399387	+
875	Q96FJ2	DYNLL2	Dynein light chain 2, cytoplasmic OS=Homo sapiens OX=9606 GN=DYNLL2 PE=1 SV=1	2			380.838	475.081	503.642	260.56	295.533	292.783	231.119	244.36	168.874	161.726	159.546	327.54	292.324	104.509	162.881	159.626		0.840355	1.04831	1.11133	0.57495	0.652122	0.646053	0.509986	0.539203	0.372636	0.356864	0.352053	0.722748	0.645041	0.230609	0.359412	0.35223		+	2.10655	0.00154895	-0.671661	+	2.94288	0.00103561	-0.540998	+
876	P63172	DYNLT1	Dynein light chain Tctex-type 1 OS=Homo sapiens OX=9606 GN=DYNLT1 PE=1 SV=1	1			171.802	253.44	250.228	135.004	132.841	123.227	129.906	141.66	97.6774	94.0748	109.937	157.417	171.223	77.7098	104.041	97.3405		0.763033	1.12562	1.11135	0.5996	0.589994	0.547294	0.576958	0.629162	0.43382	0.417819	0.488269	0.699144	0.760462	0.345137	0.462083	0.432323		+	1.81832	0.000610345	-0.767204	+	1.66006	0.00383494	-0.435066	+
877	Q13627	DYRK1A	Dual specificity tyrosine-phosphorylation-regulated kinase 1A OS=Homo sapiens OX=9606 GN=DYRK1A PE=1 SV=2	2			244.536	317.509	347.921	200.561	188.962	185.827	179.799	185.203	122.521	115.671	125.688	209.938	227.292	116.048	119.435	120.031		0.806193	1.04677	1.14704	0.661215	0.622975	0.612639	0.592766	0.610582	0.40393	0.381347	0.414372	0.692129	0.749342	0.38259	0.393756	0.395721		+	1.84354	0.00196021	-0.646502	+	2.92421	0.0011378	-0.590112	+
878	Q96JC9	EAF1	ELL-associated factor 1 OS=Homo sapiens OX=9606 GN=EAF1 PE=1 SV=1	1			37.4118	61.0606	58.5428	40.0274	26.1433	22.9179	34.0141	37.0588	17.5027	18.6908	23.2821	33.7514	34.6736	21.9484	18.1189	18.2772		0.714806	1.16665	1.11854	0.764781	0.499505	0.437879	0.649888	0.708061	0.334414	0.357114	0.444838	0.644869	0.662489	0.419356	0.346188	0.349212		+	1.1712	0.000839941	-0.826441	+	1.83499	0.000180495	-0.851599	+
879	Q5JPH6	EARS2	Probable glutamate--tRNA ligase, mitochondrial OS=Homo sapiens OX=9606 GN=EARS2 PE=1 SV=2	5			1320.68	1622.42	1776.15	1019.74	934.916	1015.8	765.312	813.517	536.646	499.783	641.376	666.56	718.059	384.44	387.52	440.117		0.839549	1.03136	1.12909	0.648243	0.594321	0.645738	0.486504	0.517148	0.341143	0.317709	0.407719	0.423728	0.456466	0.244386	0.246344	0.27978		+	2.11063	0.00158451	-0.658152	+	1.42015	0.0023566	-0.504629	+
880	Q99848	EBNA1BP2	Probable rRNA-processing protein EBP2 OS=Homo sapiens OX=9606 GN=EBNA1BP2 PE=1 SV=2	14			3899.7	4030.93	3577.02	1580.79	1549.41	1755.66	2176.77	2137.09	1129.55	1007.73	1203.2	2846.95	2540.25	1229.8	1319.05	1223.67		1.01664	1.05085	0.932515	0.412106	0.403925	0.457694	0.567476	0.557131	0.294469	0.262711	0.31367	0.742189	0.662233	0.320604	0.343871	0.319006		+	4.07959	0	-1.23629	+	2.65401	0	-0.957674	+
881	Q15125	EBP	3-beta-hydroxysteroid-Delta(8),Delta(7)-isomerase OS=Homo sapiens OX=9606 GN=EBP PE=1 SV=3	1			86.7818	123.727	121.84	106.323	80.2324	105.574	78.3972	102.536	66.6468	65.3533	69.836	62.0575	80.8243	35.4077	55.7819	56.8058		0.78335	1.11684	1.09981	0.959742	0.724231	0.952981	0.707665	0.925558	0.601598	0.589922	0.630386	0.560172	0.729574	0.319613	0.503524	0.512767			0.348179	0.512047	-0.179549	+	1.16337	0.00619801	-0.414842	+
882	O95905	ECD	Protein ecdysoneless homolog OS=Homo sapiens OX=9606 GN=ECD PE=1 SV=1	1			164.769	227.117	248.126	151.765	135.68	129.907	120.378	132.465	77.5823	75.2673	84.3959	90.597	105.219	58.5315	57.9138	58.4629		0.77234	1.06459	1.16307	0.711385	0.635988	0.608928	0.564261	0.620918	0.36366	0.352809	0.395598	0.424665	0.493205	0.274361	0.271466	0.27404		+	1.45184	0.00434871	-0.598476	+	2.43	0.00042186	-0.676878	+
883	P42892	ECE1	Endothelin-converting enzyme 1 OS=Homo sapiens OX=9606 GN=ECE1 PE=1 SV=2	1			27.6871	39.91	38.5454	24.2372	20.4634	22.3766	33.8454	34.645	17.0165	15.4726	19.3638	39.5464	38.7898	19.9693	19.481	16.3925		0.782545	1.12801	1.08944	0.685038	0.578375	0.63245	0.956603	0.979202	0.480952	0.437316	0.547296	1.11774	1.09635	0.56441	0.550609	0.463316		+	1.62257	0.00239881	-0.646754	+	2.41353	0	-0.992466	+
884	Q9NTX5	ECHDC1	Ethylmalonyl-CoA decarboxylase OS=Homo sapiens OX=9606 GN=ECHDC1 PE=1 SV=2	9			1580.78	1983.22	2051.9	1169.02	1027.04	1062.28	828.627	895.616	511.445	463.491	535.766	849.637	868.875	425.964	410.373	419.927		0.844449	1.05943	1.09612	0.624488	0.548642	0.567467	0.442651	0.478436	0.273213	0.247596	0.286205	0.453874	0.464151	0.227549	0.21922	0.224324		+	2.39869	0.000462736	-0.778162	+	2.48774	0.00016825	-0.777227	+
885	P30084	ECHS1	Enoyl-CoA hydratase, mitochondrial OS=Homo sapiens OX=9606 GN=ECHS1 PE=1 SV=4	1			234.195	310.691	303.843	194.598	187.299	165.846	140.675	175.909	103.676	105.724	115.659	180.027	197.356	129.54	126.683	129.209		0.827808	1.0982	1.07399	0.687845	0.662045	0.586215	0.497244	0.621785	0.366463	0.373702	0.40882	0.636341	0.697594	0.457885	0.447786	0.456715		+	1.86598	0.00255789	-0.623611	+	1.547	0.00163128	-0.53951	+
886	Q5VYK3	ECPAS	Proteasome adapter and scaffold protein ECM29 OS=Homo sapiens OX=9606 GN=ECPAS PE=1 SV=2	6			648.229	781.209	817.424	514.387	500.369	509.03	427.139	428.202	291.954	273.432	313.595	457.902	462.194	228.969	256.073	276.069		0.865512	1.04307	1.09142	0.686807	0.66809	0.679655	0.570314	0.571733	0.389816	0.365085	0.418711	0.611389	0.617119	0.305718	0.341908	0.368606		+	2.23573	0.00445719	-0.553233	+	2.29743	0.00119109	-0.54789	+
887	Q9BQ95	ECSIT	Evolutionarily conserved signaling intermediate in Toll pathway, mitochondrial OS=Homo sapiens OX=9606 GN=ECSIT PE=1 SV=1	4			298.79	378.639	391.843	245.655	217.115	219.023	199.679	210.441	141.678	137.999	153.928	196.769	207.391	86.9806	100.22	99.8453		0.838299	1.06233	1.09937	0.689221	0.609148	0.614501	0.560229	0.590423	0.397498	0.387177	0.431868	0.552064	0.581866	0.244037	0.281182	0.280131		+	2.03946	0.0018027	-0.641352	+	2.30765	0.00161732	-0.505706	+
888	Q9H8V3	ECT2	Protein ECT2 OS=Homo sapiens OX=9606 GN=ECT2 PE=1 SV=4	12			2296.11	2826.78	2931.18	1523.89	1302.36	1346.12	2590.99	2384.52	1172.57	1032.36	1143.01	2120.83	2012.05	785.037	781.068	809.127		0.855261	1.05293	1.09181	0.567622	0.485106	0.501406	0.965098	0.888192	0.436762	0.384536	0.425751	0.789972	0.749453	0.292413	0.290934	0.301386		+	2.72367	0.000224939	-0.944046	+	3.06558	0	-1.15745	+
889	Q96F86	EDC3	Enhancer of mRNA-decapping protein 3 OS=Homo sapiens OX=9606 GN=EDC3 PE=1 SV=1	1			447.082	528.363	548.675	349.839	290.728	305.343	252.643	288.082	188.566	184.266	211.718	212.513	212.949	117.272	114.509	132.051		0.880013	1.04	1.07998	0.688605	0.572254	0.601022	0.49729	0.567046	0.371164	0.3627	0.416735	0.4183	0.419158	0.230832	0.225394	0.259922		+	2.3248	0.000886713	-0.687076	+	1.66879	0.0031545	-0.472122	+
890	Q6P2E9	EDC4	Enhancer of mRNA-decapping protein 4 OS=Homo sapiens OX=9606 GN=EDC4 PE=1 SV=1	14			1855.63	2426.96	2472.84	1665.18	1488.41	1585.78	1105.86	1388.93	1056.24	932.919	1118.9	1494.33	1569.47	1118.64	1013.89	1189.52		0.824062	1.07778	1.09816	0.739485	0.660984	0.704225	0.491098	0.616806	0.469063	0.414297	0.496889	0.663613	0.696982	0.496774	0.450256	0.528251			1.61666	0.0110774	-0.500862		0.709371	0.0788125	-0.262624	+
891	O60869	EDF1	Endothelial differentiation-related factor 1 OS=Homo sapiens OX=9606 GN=EDF1 PE=1 SV=1	3			175.799	200.752	213.486	513.898	412.788	447.289	129.397	122.861	399.848	326.725	347.709	155.406	161.836	331.331	351.789	300.291		0.893837	1.02071	1.08545	2.61288	2.09879	2.27421	0.65791	0.624678	2.033	1.66121	1.7679	0.79015	0.822843	1.68463	1.78865	1.52681		+	3.22131	0	1.2182	+	3.01626	0	1.50072	+
892	Q3B7T1	EDRF1	Erythroid differentiation-related factor 1 OS=Homo sapiens OX=9606 GN=EDRF1 PE=1 SV=1	5			378.605	478.035	533.671	287.404	251.168	269.166	249.413	253.55	169.368	149.523	196.185	223.951	246.571	132.753	127.932	125.099		0.81695	1.0315	1.15155	0.620158	0.541968	0.580804	0.538181	0.547108	0.365461	0.322639	0.423326	0.483239	0.532049	0.286453	0.27605	0.269937		+	2.10393	0.000694118	-0.771177	+	1.50066	0.00143271	-0.559489	+
893	O75530	EED	Polycomb protein EED OS=Homo sapiens OX=9606 GN=EED PE=1 SV=2	3			695.112	819.573	836.951	463.715	416.39	436.117	682.215	663.464	342.304	327.829	355.724	607.659	605.661	255.357	268.391	251.033		0.88676	1.04554	1.0677	0.591565	0.531192	0.556358	0.870307	0.846386	0.43668	0.418214	0.4538	0.775195	0.772646	0.325761	0.342388	0.320245		+	3.01604	0.000340716	-0.833791	+	3.62987	0	-0.977129	+
894	Q5VTE0	EEF1A1P5	Putative elongation factor 1-alpha-like 3 OS=Homo sapiens OX=9606 GN=EEF1A1P5 PE=5 SV=1	16			1800.71	2117.59	2266.8	1439.69	1330.66	1318.58	1180.84	1347.31	842.696	789.11	929.68	1364.3	1381.82	811.057	732.137	884.269		0.87341	1.02711	1.09948	0.698302	0.645419	0.63956	0.572751	0.653495	0.408738	0.382747	0.450929	0.661735	0.670233	0.393392	0.355113	0.428903		+	2.29046	0.00298667	-0.591587	+	1.80923	0.00118484	-0.566218	+
895	Q05639	EEF1A2	Elongation factor 1-alpha 2 OS=Homo sapiens OX=9606 GN=EEF1A2 PE=1 SV=1	14			5733.42	7196.21	7133.42	4879.08	4500.61	4505.46	3467.88	4127.7	2749.37	2553.8	3020.27	4148.33	4356.29	3015.93	2752.02	2970.89		0.85731	1.07604	1.06665	0.729562	0.67297	0.673695	0.518547	0.617209	0.411109	0.381866	0.451617	0.620294	0.65139	0.450968	0.411506	0.444233		+	1.9988	0.0066276	-0.524274	+	1.39222	0.00355226	-0.450888	+
896	P24534	EEF1B2	Elongation factor 1-beta OS=Homo sapiens OX=9606 GN=EEF1B2 PE=1 SV=3	13			2191.29	2690.84	2894.18	1766.68	1530.27	1475.72	1287.47	1589.95	1002.22	945.238	1161.47	1233.97	1196.1	686	699.996	803.119		0.845371	1.03809	1.11654	0.681562	0.590358	0.569314	0.496689	0.613382	0.386644	0.364661	0.44808	0.47605	0.46144	0.26465	0.270049	0.309833		+	2.08044	0.00103047	-0.698915	+	1.21298	0.00341083	-0.470793	+
897	P29692	EEF1D	Elongation factor 1-delta OS=Homo sapiens OX=9606 GN=EEF1D PE=1 SV=5	11			3854.45	4799.81	4700.45	3181.47	2967.12	2969.33	2048.17	2379.26	1605.81	1531.89	1719.22	2036.93	2193.31	1418.86	1317.93	1467.55		0.865863	1.07823	1.05591	0.714685	0.666533	0.66703	0.460101	0.534477	0.360729	0.344124	0.386205	0.457576	0.492705	0.318732	0.29606	0.32967		+	2.16396	0.0049	-0.544469	+	1.66399	0.00343545	-0.448968	+
898	O43324	EEF1E1	Eukaryotic translation elongation factor 1 epsilon-1 OS=Homo sapiens OX=9606 GN=EEF1E1 PE=1 SV=1	3			442.379	532.629	627.281	428.207	398.068	474.498	250.355	231.546	187.89	155.532	231.984	290.474	297.234	177.74	189.685	234.322		0.828276	0.997253	1.17447	0.801741	0.745311	0.888413	0.468745	0.433529	0.35179	0.291206	0.434349	0.543861	0.556518	0.332786	0.355151	0.438726			0.823943	0.278955	-0.289933		0.675292	0.0237023	-0.347262	+
899	P26641	EEF1G	Elongation factor 1-gamma OS=Homo sapiens OX=9606 GN=EEF1G PE=1 SV=3	14			2497.7	2997.4	3070.26	2188.39	2023.5	2072	1649.51	2030.19	1525.03	1433.31	1710.02	1546.2	1568.2	1000.67	962.465	1222.15		0.874814	1.04983	1.07535	0.766479	0.708727	0.725714	0.577738	0.71107	0.534139	0.502014	0.598931	0.541553	0.549259	0.350483	0.337101	0.428056			1.94081	0.0215344	-0.441642		0.687775	0.112603	-0.237759	+
900	P13639	EEF2	Elongation factor 2 OS=Homo sapiens OX=9606 GN=EEF2 PE=1 SV=4	17			2829.77	3402.91	2835.09	1554.49	1356.17	1415.19	2379.53	2307.36	1264.39	1077.27	1173.64	2532.34	2329.62	904.231	810.421	770.457		0.936207	1.12583	0.937967	0.514291	0.448678	0.468204	0.787249	0.763372	0.418313	0.356406	0.38829	0.837805	0.770736	0.299158	0.268121	0.2549		+	3.2625	0	-1.06462	+	2.84223	0	-1.00286	+
901	A8K855	EFCAB7	EF-hand calcium-binding domain-containing protein 7 OS=Homo sapiens OX=9606 GN=EFCAB7 PE=1 SV=1	1			128.595	134.88	148.699	82.0241	76.796	78.5444	130.204	91.9132	59.7372	57.9211	63.0926	113.793	116.163	58.7114	51.864	61.3119		0.935976	0.981721	1.0823	0.597011	0.558958	0.571684	0.947687	0.668988	0.434796	0.421578	0.459218	0.82824	0.84549	0.42733	0.377491	0.446257		+	3.52011	0.000490909	-0.794034	+	1.67922	0.000174894	-0.861424	+
902	Q7Z2Z2	EFL1	Elongation factor-like GTPase 1 OS=Homo sapiens OX=9606 GN=EFL1 PE=1 SV=2	4			370.678	460.611	494.355	331.042	286.018	291.164	244.215	259.306	166.534	159.465	193.595	281.586	286.374	179.49	164.995	183.911		0.838863	1.04239	1.11875	0.749165	0.647273	0.658919	0.552671	0.586823	0.376875	0.360877	0.438115	0.637243	0.648079	0.406195	0.373392	0.4162		+	1.71958	0.00656668	-0.538104	+	1.75633	0.00143733	-0.544038	+
903	Q14156	EFR3A	Protein EFR3 homolog A OS=Homo sapiens OX=9606 GN=EFR3A PE=1 SV=2	1			244.163	316.362	334.479	203.908	187.975	228.402	150.383	219.633	144.605	132.265	165.657	191.439	203.04	159.392	124.633	172.437		0.81842	1.06043	1.12115	0.683487	0.630081	0.76559	0.504075	0.736197	0.484707	0.443344	0.555272	0.641692	0.680578	0.534272	0.417762	0.577999		+	1.48875	0.00991959	-0.520434		0.54352	0.0524405	-0.307286	+
904	Q15029	EFTUD2	116 kDa U5 small nuclear ribonucleoprotein component OS=Homo sapiens OX=9606 GN=EFTUD2 PE=1 SV=1	15			2906.95	3721.53	3901.01	2622.31	2415.29	2493.29	1606.21	1922.29	1371.33	1327.67	1540.02	1739.73	1841.9	1081.12	1144.72	1245.85		0.828231	1.06032	1.11145	0.747133	0.68815	0.710373	0.457632	0.547687	0.390711	0.378272	0.438773	0.495674	0.524783	0.308026	0.326147	0.35496			1.59386	0.0167439	-0.472721		1.04978	0.0250958	-0.317436	+
905	P00533	EGFR	Epidermal growth factor receptor OS=Homo sapiens OX=9606 GN=EGFR PE=1 SV=2	5			426.755	518.586	588.818	392.275	351.621	408.525	430.069	502.807	367.949	326.458	380.728	604.264	642.703	450.725	440.149	467.594		0.834506	1.01408	1.15142	0.767082	0.687584	0.798858	0.840986	0.983223	0.719513	0.638378	0.744502	1.18162	1.25679	0.881379	0.860698	0.914365			1.26361	0.0633891	-0.403167	+	1.28541	0.00810953	-0.378898	+
906	Q8NDI1	EHBP1	EH domain-binding protein 1 OS=Homo sapiens OX=9606 GN=EHBP1 PE=1 SV=3	1			37.0878	33.9614	41.8874	24.3613	20.4857	30.2478	20.7541	24.6048	13.8873	11.0657	18.6617	23.9739	22.4398	13.687	13.2942	14.0114		0.985185	0.902136	1.11268	0.647123	0.544173	0.80349	0.551303	0.653591	0.368896	0.293945	0.495721	0.636833	0.596081	0.363576	0.353141	0.372193		+	1.50613	0.00401379	-0.601773	+	0.962771	0.00102754	-0.669521	+
907	Q8N3D4	EHBP1L1	EH domain-binding protein 1-like protein 1 OS=Homo sapiens OX=9606 GN=EHBP1L1 PE=1 SV=2	3			261.799	297.083	309.465	173.35	157.851	164.186	209.649	238.793	176.941	155.023	195.686	217.11	233.549	131.212	129.95	144.386		0.904474	1.02637	1.06915	0.598897	0.54535	0.567236	0.724304	0.824992	0.611303	0.53558	0.676064	0.75008	0.806874	0.453316	0.448956	0.498831		+	3.21298	0.0005	-0.807173		1.04164	0.0142879	-0.353771	+
908	Q9H4M9	EHD1	EH domain-containing protein 1 OS=Homo sapiens OX=9606 GN=EHD1 PE=1 SV=2	2			104.182	125.978	116.687	64.2477	68.0507	59.4766	93.2951	100.685	65.0851	55.0771	70.931	120.597	127.532	68.8729	74.8382	82.6231		0.901106	1.08963	1.00927	0.555701	0.588594	0.514434	0.806942	0.870859	0.562944	0.476381	0.613507	1.04309	1.10307	0.595706	0.647302	0.714636		+	3.02605	0.000169118	-0.85271	+	1.62266	0.00112451	-0.61339	+
909	Q9H223	EHD4	EH domain-containing protein 4 OS=Homo sapiens OX=9606 GN=EHD4 PE=1 SV=1	6			258.456	346.727	343.174	241.604	235.071	220.008	243.901	265.539	180.643	176.513	204.347	260.424	276.097	193.273	212.184	217.734		0.817591	1.09682	1.08558	0.764282	0.743616	0.695966	0.771548	0.839997	0.57144	0.558375	0.646424	0.823816	0.873396	0.611393	0.671216	0.688772			1.39695	0.0354384	-0.433121	+	1.72421	0.00343269	-0.446297	+
910	Q08426	EHHADH	Peroxisomal bifunctional enzyme OS=Homo sapiens OX=9606 GN=EHHADH PE=1 SV=3	3			124.221	150.394	160.746	94.2414	85.387	89.0218	176.294	188.081	127.033	131.186	144.211	176.506	185.1	106.722	102.308	114.975		0.855986	1.03634	1.10767	0.649402	0.588388	0.613434	1.21481	1.29603	0.875363	0.903981	0.993734	1.21627	1.27549	0.735403	0.704987	0.792274		+	2.3569	0.000900568	-0.689229	+	1.95084	0.00334357	-0.443003	+
911	Q9H9B1	EHMT1	Histone-lysine N-methyltransferase EHMT1 OS=Homo sapiens OX=9606 GN=EHMT1 PE=1 SV=4	2			448.24	547.342	591.473	306.991	260.121	268.322	339.556	340.541	176.55	167.451	190.665	332.088	308.799	138.358	155.137	160.607		0.847305	1.03464	1.11806	0.580303	0.491705	0.507207	0.641861	0.643722	0.333731	0.316532	0.360413	0.627744	0.583721	0.261537	0.293254	0.303594		+	2.55734	0.000193684	-0.919894	+	3.03718	0	-0.93412	+
912	Q96KQ7	EHMT2	Histone-lysine N-methyltransferase EHMT2 OS=Homo sapiens OX=9606 GN=EHMT2 PE=1 SV=3	3			711.315	920.344	866.41	508.652	411.03	464.438	490.342	486.716	290.416	271.983	313.586	491.654	471.13	245.276	236.549	229.396		0.854238	1.10527	1.0405	0.610854	0.493617	0.557756	0.588865	0.584511	0.348769	0.326632	0.376594	0.590441	0.565793	0.294559	0.284078	0.275488		+	2.39062	0.000489426	-0.848768	+	2.63466	0.000551378	-0.744935	+
913	O14681	EI24	Etoposide-induced protein 2.4 homolog OS=Homo sapiens OX=9606 GN=EI24 PE=1 SV=4	1			52.4052	79.6933	90.7018	61.2551	58.9989	58.45	35.935	36.2691	19.6617	19.1317	31.2205	32.7761	35.2471	17.0043	25.5051	20.825		0.705635	1.07307	1.2213	0.824798	0.794419	0.787028	0.483864	0.488362	0.264744	0.257608	0.420383	0.441329	0.474601	0.228962	0.343425	0.280408			0.513681	0.333708	-0.28086	+	0.960925	0.00102204	-0.66745	+
914	P47813	EIF1AX	Eukaryotic translation initiation factor 1A, X-chromosomal OS=Homo sapiens OX=9606 GN=EIF1AX PE=1 SV=2	5			507.108	512.052	508.812	282.483	257.102	228.706	411.125	392.582	213.506	197.029	204.257	274.996	286.803	126.764	107.085	127.63		0.995649	1.00536	0.998995	0.554623	0.504791	0.449038	0.807197	0.77079	0.419195	0.386844	0.401035	0.539924	0.563105	0.248887	0.210249	0.250587		+	3.45714	0	-0.997239	+	3.53003	0	-0.971929	+
915	Q9BY44	EIF2A	Eukaryotic translation initiation factor 2A OS=Homo sapiens OX=9606 GN=EIF2A PE=1 SV=3	15			3998.05	4754.91	4715.19	2539.07	2263.56	2326.51	3821.53	3530.51	1752.14	1519.34	1746.06	3175.41	3009.64	1207.4	1192.63	1256.58		0.890557	1.05915	1.0503	0.565572	0.504203	0.518225	0.851237	0.786413	0.390285	0.33843	0.388931	0.707315	0.670391	0.268946	0.265656	0.2799		+	3.17774	0.00022276	-0.91499	+	2.8725	0	-1.13812	+
916	P19525	EIF2AK2	Interferon-induced, double-stranded RNA-activated protein kinase OS=Homo sapiens OX=9606 GN=EIF2AK2 PE=1 SV=2	15			5471.59	7335.18	6751.77	3861.69	3483.05	3745.86	6646.84	6307.18	2874.39	2744.01	3021.75	7010.52	4883.64	2554.67	2507.43	2578.42		0.839264	1.12511	1.03562	0.592328	0.53425	0.574561	1.01953	0.967431	0.44089	0.420892	0.463493	1.07531	0.74908	0.39185	0.384604	0.395493		+	2.42827	0.000417526	-0.809059	+	3.5518	0	-1.16986	+
917	Q9P2K8	EIF2AK4	eIF-2-alpha kinase GCN2 OS=Homo sapiens OX=9606 GN=EIF2AK4 PE=1 SV=3	1			387.874	459.883	526.653	343.367	297.389	322.131	249.698	312.428	229.84	214.503	293.371	216.388	221.814	142.13	135.374	149.463		0.846634	1.00381	1.14955	0.749486	0.649127	0.703133	0.54503	0.681954	0.501684	0.468207	0.640357	0.472322	0.484166	0.310235	0.295488	0.326241			1.63426	0.0108832	-0.504653		0.371507	0.220931	-0.197069	+
918	Q14232	EIF2B1	Translation initiation factor eIF-2B subunit alpha OS=Homo sapiens OX=9606 GN=EIF2B1 PE=1 SV=1	10			2455.25	2974.85	2812.51	1669.33	1499.11	1489.4	1800.67	1725.59	918.033	794.11	923.988	1732.84	1655.89	706.908	736.059	742.752		0.893619	1.08273	1.02365	0.607573	0.54562	0.542086	0.655376	0.62805	0.334129	0.289026	0.336297	0.630689	0.602682	0.257288	0.267898	0.270334		+	2.95396	0.000503888	-0.820813	+	2.7485	0	-1.00782	+
919	P49770	EIF2B2	Translation initiation factor eIF-2B subunit beta OS=Homo sapiens OX=9606 GN=EIF2B2 PE=1 SV=3	1			183.858	222.637	234.33	149.98	145.719	142.066	102.007	128.913	82.7238	82.2319	93.9475	129.473	128.752	88.3029	69.8626	78.1278		0.860725	1.04227	1.09701	0.702126	0.682178	0.665077	0.477542	0.603502	0.387269	0.384966	0.439812	0.606123	0.602748	0.413387	0.327059	0.365753		+	2.12012	0.00513401	-0.542436	+	1.15367	0.00656617	-0.412843	+
[truncated: 2,898 more rows]
[truncated: 11 more columns]

## Sheet: Polysome
Polysome sucrose gradient fraction (pooled) analysis with or without low emetine treatment. 16plex TMT-MS3 analysis of HCT116 WT, ∆ZNF598, and ZNF598-OE cells. Analyzed with Comet (2018.01 rev. 2)
Related to Figure 2A-2E and Figure 2-figure supplement 1A-1C
[truncated: 3,572 more rows]
[truncated: 11 more columns]
