# Supplementary material for: EDF1 coordinates cellular responses to ribosome collisions
Source: eLife. 2020 Aug 3;9:e58828. doi: 10.7554/eLife.58828 (PMC7486125; doi:10.7554/eLife.58828)
Supplement: Figure 5—source data 1. [file elife-58828-fig5-data1.xlsx]

## Sheet: Fig5-source-data-1
Sinha N. et al. (2020)
Figure 5-source data 1: Related to Figure 5A

## Sheet: Sheet2
Immunoaffinity purification of endogenous EDF1 from untreated (UT) and 1.8 µM emetine treated (EL) HEK293T cells for 15 min. Searched with Andromeda; analyzed with Maxquant (1.6.7.0) and Perseus (1.6.7.0)
Related to Figure 5A
Rank	Gene symbol	Protein IDs	Protein Names	Mol. weight [kDa]	Peptides	Razor + unique peptides	Unique peptides	Sequence coverage [%]	Unique + razor sequence coverage [%]	Unique sequence coverage [%]	Q-value	Score	Intensity	MS/MS count	Log2(LFQ-EDF1-UT)	Log2(LFQ-EDF1-EL)
1	AAAS	Q9NRG9	Aladin	59.573	8	8	8	21.6	21.6	21.6	0	40.388	237960000	14	23.838	23.651
2	AAGAB	Q6PD74	Alpha- and gamma-adaptin-binding protein p34	34.593	1	1	1	13	13	13	0	6.3972	22339000	3	19.3679	19.3551
3	AAMP	Q13685	Angio-associated migratory cell protein	46.75	5	5	5	16.6	16.6	16.6	0	15.803	163190000	10	24.2838	24.15
4	AAR2	Q9Y312	Protein AAR2 homolog	43.472	2	2	2	7.3	7.3	7.3	0.0026774	1.7375	14040000	1	21.4167	17.8047
5	AARS	P49588	Alanine--tRNA ligase, cytoplasmic	106.81	13	13	13	17.7	17.7	17.7	0	57.202	134050000	22	24.6728	24.8455
6	AARS2	Q5JTZ9	Alanine--tRNA ligase, mitochondrial	107.34	13	13	13	18.8	18.8	18.8	0	40.256	198720000	22	24.6424	24.6044
7	AARSD1	Q9BTE6	Alanyl-tRNA editing protein Aarsd1	45.479	2	2	2	6.3	6.3	6.3	0	11.34	44587000	7	23.1779	23.2939
8	AASS	Q9UDR5	Alpha-aminoadipic semialdehyde synthase, mitochondrial;Lysine ketoglutarate reductase;Saccharopine dehydrogenase	102.13	3	3	3	5.4	5.4	5.4	0	5.5081	39032000	3	21.663	21.5669
9	ABCB7	O75027	ATP-binding cassette sub-family B member 7, mitochondrial	82.64	3	3	3	4.9	4.9	4.9	0	5.0415	34552000	4	21.2079	21.0237
10	ABCD1	P33897	ATP-binding cassette sub-family D member 1	82.936	8	8	8	15.3	15.3	15.3	0	33.947	100390000	12	24.0044	23.9096
11	ABCD3	P28288	ATP-binding cassette sub-family D member 3	75.475	19	19	19	34	34	34	0	89.725	636110000	43	25.5099	25.4657
12	ABCE1	P61221	ATP-binding cassette sub-family E member 1	67.314	12	12	12	28	28	28	0	75.244	404770000	27	25.353	25.4013
13	ABCF2	Q9UG63	ATP-binding cassette sub-family F member 2	71.289	29	29	29	43	43	43	0	102.51	1759500000	91	28.2624	28.2693
14	ABHD12	Q8N2K0	Monoacylglycerol lipase ABHD12	45.096	1	1	1	3.8	3.8	3.8	0.00040404	3.1186	14436000	3	20.1191	19.3051
15	ABHD14B	Q96IU4	Alpha/beta hydrolase domain-containing protein 14B	22.345	3	3	3	17.6	17.6	17.6	0	6.9837	75074000	8	21.8077	21.669
16	ABI1	Q8IZP0	Abl interactor 1	55.08	2	2	2	4.5	4.5	4.5	0	3.3924	54678000	2	20.04	20.8239
17	ABL2	P42684	Abelson tyrosine-protein kinase 2	128.34	2	2	2	2.5	2.5	2.5	0	4.8332	12194000	2	18.0683	20.3971
18	ABR	Q12979	Active breakpoint cluster region-related protein	97.597	2	2	2	3.4	3.4	3.4	0	3.8742	9916800	2	20.3011	18.0598
19	ACAA2	P42765	3-ketoacyl-CoA thiolase, mitochondrial	41.924	9	9	9	38.8	38.8	38.8	0	51.36	408440000	23	25.037	25.0747
20	ACACA	Q13085	Acetyl-CoA carboxylase 1;Biotin carboxylase	265.55	15	15	13	8.2	8.2	6.6	0	51.237	214700000	26	24.4653	24.4485
21	ACAD11	Q709F0	Acyl-CoA dehydrogenase family member 11	87.263	2	2	2	3.7	3.7	3.7	0	5.4288	31813000	4	20.8762	20.9764
22	ACAD9	Q9H845	Acyl-CoA dehydrogenase family member 9, mitochondrial	68.76	7	7	7	14.2	14.2	14.2	0	8.8003	39306000	6	22.2079	22.4065
23	ACADM	P11310	Medium-chain specific acyl-CoA dehydrogenase, mitochondrial	46.588	12	12	12	33.3	33.3	33.3	0	72.116	995870000	30	25.6675	25.7408
24	ACADSB	P45954	Short/branched chain specific acyl-CoA dehydrogenase, mitochondrial	47.485	3	3	3	11.6	11.6	11.6	0	10.969	54097000	4	19.9819	21.986
25	ACAP2	Q15057	Arf-GAP with coiled-coil, ANK repeat and PH domain-containing protein 2	88.028	5	5	5	9	9	9	0	10.197	62538000	8	23.2149	23.4723
26	ACAT1	P24752	Acetyl-CoA acetyltransferase, mitochondrial	45.199	16	16	16	48.5	48.5	48.5	0	208.96	1657800000	82	27.8553	27.8021
27	ACAT2	Q9BWD1	Acetyl-CoA acetyltransferase, cytosolic	41.35	8	8	8	30	30	30	0	43.474	816240000	28	26.7048	26.8377
28	ACBD3	Q9H3P7	Golgi resident protein GCP60	60.593	9	9	9	29	29	29	0	140.11	331200000	37	25.9049	25.9552
29	ACD	Q96AP0	Adrenocortical dysplasia protein homolog	57.733	1	1	1	1.5	1.5	1.5	0.009071	1.3099	3502300	1	18.256	18.386
30	ACIN1	Q9UKV3	Apoptotic chromatin condensation inducer in the nucleus	151.86	5	5	5	4	4	4	0	8.7984	68238000	8	23.1676	23.3935
31	ACLY	P53396	ATP-citrate synthase	120.84	51	51	51	61.2	61.2	61.2	0	323.31	7732100000	224	28.7896	28.8442
32	ACO2	Q99798	Aconitate hydratase, mitochondrial	85.424	2	2	2	4	4	4	0	5.8528	31167000	2	20.7373	18.7283
33	ACOT1	Q86TX2	Acyl-coenzyme A thioesterase 1	46.277	12	12	2	35.6	35.6	5.7	0	85.463	284730000	29	24.4488	24.3026
34	ACOT2	P49753	Acyl-coenzyme A thioesterase 2, mitochondrial	53.218	11	1	1	31.1	5	5	0.008153	1.324	26261000	2	21.039	18.7577
35	ACOT7	O00154	Cytosolic acyl coenzyme A thioester hydrolase	41.796	7	7	7	29.5	29.5	29.5	0	36.105	663340000	19	24.9331	24.9547
36	ACP1	P24666	Low molecular weight phosphotyrosine protein phosphatase	18.042	8	8	8	47.5	47.5	47.5	0	97.944	510190000	21	24.3784	24.5395
37	ACSL1;ACSL5	P33121;Q9ULC5	Long-chain-fatty-acid--CoA ligase 1;Long-chain-fatty-acid--CoA ligase 5	77.942	2	2	2	3.2	3.2	3.2	0.0003879	2.8322	12757000	1	17.1798	20.9694
38	ACSL3	O95573	Long-chain-fatty-acid--CoA ligase 3	80.419	15	15	13	24.9	24.9	20.8	0	80.394	515670000	19	24.8019	24.7253
39	ACSL4	O60488	Long-chain-fatty-acid--CoA ligase 4	79.187	7	5	5	12.7	8.6	8.6	0	33.816	74319000	11	23.889	23.8879
40	ACSS2	Q9NR19	Acetyl-coenzyme A synthetase, cytoplasmic	78.579	1	1	1	1.3	1.3	1.3	0.003001	1.6942	2056600	1	20.9718	18.9835
41	ACTA1;ACTC1;ACTG2;ACTA2	P68133;P68032;P63267;P62736	Actin, alpha skeletal muscle;Actin, alpha cardiac muscle 1;Actin, gamma-enteric smooth muscle;Actin, aortic smooth muscle	42.051	13	1	1	31.6	4.2	4.2	0	16.988	204450000	10	23.795	20.4079
42	ACTB	P60709;Q6S8J3;A5A3E0;P0CG38;P0CG39;Q9BYX7;Q562R1	Actin, cytoplasmic 1;Actin, cytoplasmic 1, N-terminally processed	41.736	24	24	1	81.3	81.3	4.5	0	323.31	9223100000	186	29.0749	29.1805
43	ACTG1	P63261	Actin, cytoplasmic 2;Actin, cytoplasmic 2, N-terminally processed	41.792	24	1	1	81.3	4.5	4.5	0	25.067	135850000	4	22.4022	19.6277
44	ACTL6A	O96019	Actin-like protein 6A	47.46	3	3	3	11.9	11.9	11.9	0	3.8905	31277000	4	20.8134	20.9777
45	ACTN4	O43707;P12814	Alpha-actinin-4	104.85	10	10	9	16.2	16.2	14.9	0	36.06	97588000	9	22.4878	23.126
46	ACTR1A	P61163	Alpha-centractin	42.613	19	19	12	62	62	42.6	0	174.04	2888400000	72	27.7565	27.716
47	ACTR2	P61160	Actin-related protein 2	44.76	7	7	7	18.8	18.8	18.8	0	60.594	362380000	19	24.6095	24.6327
48	ACTR3	P61158;Q9P1U1;Q9C0K3	Actin-related protein 3	47.371	11	11	11	34.2	34.2	34.2	0	53.089	660220000	40	25.3945	25.398
49	ADAR	P55265	Double-stranded RNA-specific adenosine deaminase	136.06	24	24	24	23.6	23.6	23.6	0	80.027	1293800000	72	26.9342	26.998
50	ADAT2	Q7Z6V5	tRNA-specific adenosine deaminase 2	21.046	2	2	2	11	11	11	0.0003655	2.364	7110500	3	21.2389	21.4947
51	ADAT3	Q96EY9	Probable inactive tRNA-specific adenosine deaminase-like protein 3	38.07	2	2	2	7.1	7.1	7.1	0	3.135	8741000	2	19.1327	21.1689
52	ADCK3	Q8NI60	Atypical kinase ADCK3, mitochondrial	71.949	4	4	4	8.8	8.8	8.8	0	16.449	66876000	6	21.3584	21.0406
53	ADD1	P35611	Alpha-adducin	80.954	2	2	2	4.7	4.7	4.7	0	5.8557	21169000	3	20.6463	20.6724
54	ADNP	Q9H2P0	Activity-dependent neuroprotector homeobox protein	123.56	15	15	15	20.5	20.5	20.5	0	33.983	263140000	28	24.9879	24.9402
55	ADRBK2;ADRBK1	P35626;P25098	Beta-adrenergic receptor kinase 2;Beta-adrenergic receptor kinase 1	79.709	2	2	2	3.9	3.9	3.9	0	18.976	16990000	2	20.2273	20.0277
56	ADRM1	Q16186	Proteasomal ubiquitin receptor ADRM1	42.153	3	3	3	9.1	9.1	9.1	0	7.1884	75562000	5	24.793	24.9235
57	ADSL	P30566;A0A1W2PRX2	Adenylosuccinate lyase	54.889	19	19	19	48.3	48.3	48.3	0	158.75	1644500000	81	27.4912	27.4149
58	ADSS	P30520;Q8N142	Adenylosuccinate synthetase isozyme 2	50.097	8	8	8	23.5	23.5	23.5	0	33.096	568530000	27	24.4576	24.4464
59	AFG3L2	Q9Y4W6	AFG3-like protein 2	88.583	1	1	1	1.1	1.1	1.1	0.0013855	1.9844	28631000	3	23.7885	19.1492
60	AGAP3	Q96P47	Arf-GAP with GTPase, ANK repeat and PH domain-containing protein 3	95.043	2	2	2	2.7	2.7	2.7	0	3.2499	11971000	1	18.853	20.4563
61	AGFG1	P52594	Arf-GAP domain and FG repeat-containing protein 1	58.259	2	2	2	6.6	6.6	6.6	0	24.93	51982000	4	21.1471	18.8485
62	AGK	Q53H12	Acylglycerol kinase, mitochondrial	47.137	8	8	8	22.7	22.7	22.7	0	61.565	347790000	18	24.7475	24.6505
63	AGL	P35573	Glycogen debranching enzyme;4-alpha-glucanotransferase;Amylo-alpha-1,6-glucosidase	174.76	17	17	17	17.4	17.4	17.4	0	73.179	357680000	29	24.4197	24.3259
64	AGO2	Q9UKV8	Protein argonaute-2	97.207	2	2	2	2.7	2.7	2.7	0	4.0545	25272000	6	23.1533	23.3158
65	AGPAT6	Q86UL3	Glycerol-3-phosphate acyltransferase 4	52.07	2	2	2	5.5	5.5	5.5	0	6.2544	18778000	4	22.1588	21.7753
66	AGPS	O00116	Alkyldihydroxyacetonephosphate synthase, peroxisomal	72.911	13	13	13	28.1	28.1	28.1	0	40.858	285490000	26	24.6643	24.7087
67	AGTPBP1	Q9UPW5	Cytosolic carboxypeptidase 1	138.45	1	1	1	1	1	1	0.0010464	2.0236	8309100	2	22.2361	20.8056
68	AHCTF1	Q8WYP5	Protein ELYS	252.5	5	5	5	3.4	3.4	3.4	0	11.028	37382000	7	23.6835	23.3994
69	AHCY	P23526	Adenosylhomocysteinase	47.716	25	25	25	46.5	46.5	46.5	0	235.53	13183000000	191	30.2106	30.184
70	AHCYL1	O43865	Putative adenosylhomocysteinase 2	58.951	8	8	5	19.6	19.6	14	0	19.115	4191000000	14	28.7041	28.4725
71	AHNAK	Q09666	Neuroblast differentiation-associated protein AHNAK	629.09	2	2	2	2.7	2.7	2.7	0.00036456	2.3502	18261000	3	19.164	22.1233
72	AHNAK2	Q8IVF2	Protein AHNAK2	616.62	21	21	21	17.2	17.2	17.2	0	43.065	399780000	50	26.417	26.3958
73	AHSA1	O95433	Activator of 90 kDa heat shock protein ATPase homolog 1	38.274	13	13	13	50.6	50.6	50.6	0	68.4	1297500000	50	26.5424	26.7329
74	AIFM1	O95831	Apoptosis-inducing factor 1, mitochondrial	66.9	18	18	18	35.9	35.9	35.9	0	87.407	1040300000	52	27.5592	27.5395
75	AIMP1	Q12904	Aminoacyl tRNA synthase complex-interacting multifunctional protein 1;Endothelial monocyte-activating polypeptide 2	34.352	14	14	14	61.5	61.5	61.5	0	93.54	1283700000	55	26.5838	26.598
76	AIMP2	Q13155	Aminoacyl tRNA synthase complex-interacting multifunctional protein 2	35.348	6	6	6	27.2	27.2	27.2	0	55.875	609170000	32	25.1151	25.1011
77	AIP	O00170	AH receptor-interacting protein	37.636	3	3	3	11.8	11.8	11.8	0	6.2658	70361000	6	24.5343	24.5168
78	AK1	P00568	Adenylate kinase isoenzyme 1	21.635	2	2	2	11.9	11.9	11.9	0.0032895	1.6038	11339000	2	19.6751	21.7014
79	AK4	P27144	Adenylate kinase 4, mitochondrial	25.268	5	5	5	39	39	39	0	7.6212	131560000	10	24.7867	24.6227
80	AK6	Q9Y3D8	Adenylate kinase isoenzyme 6	20.061	4	4	4	17.4	17.4	17.4	0	6.6908	25999000	5	18.905	22.044
81	AKAP1	Q92667	A-kinase anchor protein 1, mitochondrial	97.34	3	3	3	5.2	5.2	5.2	0.00037244	2.5085	112670000	3	23.7886	19.4384
82	AKAP10	O43572	A-kinase anchor protein 10, mitochondrial	73.817	2	2	2	3.5	3.5	3.5	0.00071813	2.2432	3293000	1	18.5256	18.9742
83	AKAP11	Q9UKA4	A-kinase anchor protein 11	210.51	1	1	1	1	1	1	0	3.2975	9532600	1	19.3956	18.2701
84	AKAP12	Q02952	A-kinase anchor protein 12	191.48	3	3	3	2.9	2.9	2.9	0	7.7235	41815000	7	24.2365	24.256
85	AKAP8	O43823	A-kinase anchor protein 8	76.107	2	2	2	4.6	4.6	4.6	0	6.8526	35812000	4	23.7078	23.6452
86	AKAP8L	Q9ULX6	A-kinase anchor protein 8-like	71.639	3	3	3	6.7	6.7	6.7	0	6.048	45062000	3	20.7708	20.854
87	AKR1A1	P14550	Alcohol dehydrogenase [NADP(+)]	36.573	1	1	1	3.1	3.1	3.1	0.00040193	3.0865	239930000	3	23.789	17.478
88	AKR1B1	P15121	Aldose reductase	35.853	12	12	12	55.1	55.1	55.1	0	54.559	1605300000	30	26.5655	26.5815
89	AKR7A2	O43488	Aflatoxin B1 aldehyde reductase member 2	39.589	2	2	2	8.4	8.4	8.4	0	16.368	108040000	4	22.483	22.5182
90	AKT1	P31749	RAC-alpha serine/threonine-protein kinase	55.686	2	2	2	4.8	4.8	4.8	0	3.6689	7088900	3	21.6986	17.8487
91	ALDH16A1	Q8IZ83	Aldehyde dehydrogenase family 16 member A1	85.126	5	5	5	9.5	9.5	9.5	0	18.255	245620000	10	23.5388	23.5953
92	ALDH18A1	P54886	Delta-1-pyrroline-5-carboxylate synthase;Glutamate 5-kinase;Gamma-glutamyl phosphate reductase	87.301	26	26	26	40.8	40.8	40.8	0	323.31	2508600000	99	27.7392	27.7586
93	ALDH1B1	P30837	Aldehyde dehydrogenase X, mitochondrial	57.206	7	7	6	18	18	16.4	0	16.188	106690000	14	23.3623	23.5748
94	ALDH1L1	O75891	Cytosolic 10-formyltetrahydrofolate dehydrogenase	98.828	1	1	1	1.8	1.8	1.8	0	3.4543	13699000	2	19.7274	18.2863
95	ALDH1L2	Q3SY69	Mitochondrial 10-formyltetrahydrofolate dehydrogenase	101.74	2	2	2	2.7	2.7	2.7	0.0069554	1.3702	12327000	2	19.9822	18.9971
96	ALDH2	P05091;F8VP50;P00352;P47895	Aldehyde dehydrogenase, mitochondrial	56.381	5	4	4	10.6	9.1	9.1	0	5.8337	57152000	6	23.0338	22.872
97	ALDH3A2	P51648	Fatty aldehyde dehydrogenase	54.847	3	3	3	6.6	6.6	6.6	0	6.0353	56136000	6	20.7976	22.9231
98	ALDH5A1	P51649	Succinate-semialdehyde dehydrogenase, mitochondrial	57.214	4	4	4	13.1	13.1	13.1	0	14.616	10522000	2	20.2006	19.2339
99	ALDH6A1	Q02252	Methylmalonate-semialdehyde dehydrogenase [acylating], mitochondrial	57.839	2	2	2	3.4	3.4	3.4	0	3.7592	4234900	4	20.0784	18.3771
100	ALDH7A1	P49419	Alpha-aminoadipic semialdehyde dehydrogenase	58.486	9	9	9	18.7	18.7	18.7	0	33.049	489140000	31	25.8483	25.843
101	ALDH9A1	P49189	4-trimethylaminobutyraldehyde dehydrogenase	53.801	11	11	11	25.1	25.1	25.1	0	65.895	995640000	42	26.0232	26.0028
102	ALDOA	P04075	Fructose-bisphosphate aldolase A	39.42	10	10	10	30.8	30.8	30.8	0	30.173	420590000	30	26.648	26.533
103	ALG1	Q9BT22	Chitobiosyldiphosphodolichol beta-mannosyltransferase	52.518	2	2	2	9.5	9.5	9.5	0.00070847	2.1307	25901000	2	19.6403	19.7412
104	ALG13	Q9NP73	Putative bifunctional UDP-N-acetylglucosamine transferase and deubiquitinase ALG13	126.05	2	2	2	2.1	2.1	2.1	0	4.2729	11664000	3	18.8703	22.3863
105	ALG6	Q9Y672	Dolichyl pyrophosphate Man9GlcNAc2 alpha-1,3-glucosyltransferase	58.12	2	2	2	4.3	4.3	4.3	0	3.8157	16754000	2	19.7478	21.7928
106	ALKBH5	Q6P6C2	RNA demethylase ALKBH5	44.255	3	3	3	10.2	10.2	10.2	0	3.7211	11160000	4	21.0748	20.9805
107	ALMS1	Q8TCU4	Alstrom syndrome protein 1	461.06	2	2	2	0.6	0.6	0.6	0.0053883	1.388	1232500	0	17.396	19.5375
108	ALS2	Q96Q42	Alsin	183.63	1	1	1	0.7	0.7	0.7	0.0013722	1.9011	209340000	4	23.6891	18.8324
109	AMBRA1	Q9C0C7	Activating molecule in BECN1-regulated autophagy protein 1	142.51	2	2	2	2.9	2.9	2.9	0	4.4541	24275000	3	21.4889	21.0954
110	AMOT	Q4VCS5	Angiomotin	118.08	4	4	4	4	4	4	0	8.9414	19704000	5	22.5722	23.4496
111	AMPD2	Q01433	AMP deaminase 2	100.69	9	9	9	10.1	10.1	10.1	0	22.129	123390000	18	24.181	23.9756
112	ANAPC1	Q9H1A4	Anaphase-promoting complex subunit 1	216.5	2	2	2	2	2	2	0.0020387	1.8338	28564000	0	21.0285	17.9526
113	ANAPC5	Q9UJX4	Anaphase-promoting complex subunit 5	85.076	3	3	3	6	6	6	0	7.6073	25118000	4	21.4757	21.4241
114	ANAPC7	Q9UJX3	Anaphase-promoting complex subunit 7	66.855	4	4	4	8.2	8.2	8.2	0	4.8411	43653000	7	22.5887	22.0913
115	ANK3	Q12955	Ankyrin-3	480.4	1	1	1	0.3	0.3	0.3	0	6.4228	14991000	2	18.8685	23.2318
116	ANKFY1	Q9P2R3	Rabankyrin-5	128.4	8	8	8	8.5	8.5	8.5	0	34.328	131970000	13	25.0713	25.1645
117	ANKLE2	Q86XL3	Ankyrin repeat and LEM domain-containing protein 2	104.11	6	6	6	9.7	9.7	9.7	0	26.345	67347000	8	22.8777	23.0898
118	ANKMY2	Q8IV38	Ankyrin repeat and MYND domain-containing protein 2	49.298	2	2	2	5.4	5.4	5.4	0	3.5805	13764000	3	21.0072	21.2727
119	ANKRD17;ANKHD1	O75179;Q8IWZ3	Ankyrin repeat domain-containing protein 17;Ankyrin repeat and KH domain-containing protein 1	274.25	9	9	9	4.5	4.5	4.5	0	17.625	105750000	17	23.4139	23.1855
120	ANKRD28	O15084	Serine/threonine-protein phosphatase 6 regulatory ankyrin repeat subunit A	112.96	3	3	3	5.3	5.3	5.3	0	12.845	31634000	5	20.7704	20.7397
121	ANKRD40	Q6AI12	Ankyrin repeat domain-containing protein 40	41.088	1	1	1	2.4	2.4	2.4	0.003	1.6909	4148200	2	21.1622	18.2769
122	ANKRD52	Q8NB46	Serine/threonine-protein phosphatase 6 regulatory ankyrin repeat subunit C	115.08	2	2	2	3.5	3.5	3.5	0	3.4786	16855000	3	19.6368	19.672
123	ANKS1A	Q92625	Ankyrin repeat and SAM domain-containing protein 1A	123.11	1	1	1	1.9	1.9	1.9	0.00039557	2.9933	37739000	4	22.4424	19.0186
124	ANLN	Q9NQW6	Actin-binding protein anillin	124.2	6	6	6	7.6	7.6	7.6	0	16.475	51634000	7	23.0472	23.0802
125	ANP32C;ANP32A	O43423;P39687	Acidic leucine-rich nuclear phosphoprotein 32 family member C;Acidic leucine-rich nuclear phosphoprotein 32 family member A	26.762	1	1	1	4.7	4.7	4.7	0.00037313	2.5254	13752000	2	20.9809	17.9074
126	ANP32E	Q9BTT0	Acidic leucine-rich nuclear phosphoprotein 32 family member E	30.692	3	3	3	23.9	23.9	23.9	0	17.319	59041000	5	21.6794	21.92
127	ANXA11	P50995;P27216	Annexin A11	54.389	7	7	7	16	16	16	0	29.118	138680000	13	23.8742	23.8202
128	ANXA6	P08133	Annexin A6	75.872	11	11	11	20.5	20.5	20.5	0	22.337	658410000	21	25.8291	25.8354
129	ANXA7	P20073	Annexin A7	52.739	2	2	2	5.1	5.1	5.1	0.00299	1.6736	18175000	2	20.6555	18.5867
130	AP1B1	Q10567	AP-1 complex subunit beta-1	104.64	12	3	3	14.5	4.6	4.6	0	4.2505	29032000	5	22.0746	22.2605
131	AP1G1	O43747	AP-1 complex subunit gamma-1	91.35	6	6	6	10	10	10	0	11.561	110930000	10	23.5972	23.6508
132	AP1M1	Q9BXS5;Q9Y6Q5	AP-1 complex subunit mu-1	48.586	11	11	11	39.2	39.2	39.2	0	31.489	292580000	18	23.629	23.5572
133	AP1S1	P61966	AP-1 complex subunit sigma-1A	18.733	2	2	2	15.8	15.8	15.8	0	34.495	23406000	3	22.2577	21.9175
134	AP1S2	P56377	AP-1 complex subunit sigma-2	18.615	2	2	2	15.9	15.9	15.9	0	35.657	18705000	4	21.8211	19.1385
135	AP2A1	O95782	AP-2 complex subunit alpha-1	107.54	21	21	14	28.7	28.7	20.4	0	53.239	560830000	50	25.998	26.1164
136	AP2A2	O94973	AP-2 complex subunit alpha-2	103.96	19	12	12	27.3	18.6	18.6	0	78.115	367640000	31	25.7786	25.7143
137	AP2B1	P63010	AP-2 complex subunit beta	104.55	22	22	13	34.2	34.2	24.1	0	100.07	506710000	50	25.1599	25.197
138	AP2M1	Q96CW1	AP-2 complex subunit mu	49.654	14	14	14	35.4	35.4	35.4	0	47.563	544340000	44	25.6923	25.6861
139	AP2S1	P53680	AP-2 complex subunit sigma	17.018	3	3	3	19.7	19.7	19.7	0	4.0826	51576000	6	20.6504	21.1862
140	AP3B1	O00203;Q13367	AP-3 complex subunit beta-1	121.32	12	12	12	12.4	12.4	12.4	0	28.002	193010000	28	23.8739	24.0119
141	AP3D1	O14617	AP-3 complex subunit delta-1	130.16	10	10	10	12.3	12.3	12.3	0	52.978	269770000	22	25.7827	25.869
142	AP3M1	Q9Y2T2	AP-3 complex subunit mu-1	46.939	3	3	3	12.2	12.2	12.2	0	19.624	60619000	6	20.6137	21.0268
143	AP3S1	Q92572	AP-3 complex subunit sigma-1	21.732	2	2	2	12.4	12.4	12.4	0	4.0513	20488000	2	19.6207	19.9154
144	APC	P25054	Adenomatous polyposis coli protein	311.64	12	12	12	6.9	6.9	6.9	0	32.795	152720000	17	24.1903	24.3331
145	APEH	P13798	Acylamino-acid-releasing enzyme	81.224	2	2	2	3.3	3.3	3.3	0	5.5537	26500000	4	23.4043	19.2135
146	API5	Q9BZZ5	Apoptosis inhibitor 5	59.004	9	9	9	18.1	18.1	18.1	0	55.119	377620000	24	25.7567	26.0928
147	APLP2	Q06481	Amyloid-like protein 2	86.955	3	3	3	5.6	5.6	5.6	0	4.8362	14678000	2	19.733	18.8892
148	APMAP	Q9HDC9	Adipocyte plasma membrane-associated protein	46.48	6	6	6	17.8	17.8	17.8	0	20.026	96005000	16	23.0936	23.5424
149	APOA1BP	Q8NCW5	NAD(P)H-hydrate epimerase	31.674	2	2	2	10.8	10.8	10.8	0	3.4985	77780000	5	21.8301	21.8565
150	APOL2	Q9BQE5	Apolipoprotein L2	37.092	1	1	1	7.7	7.7	7.7	0.0072647	1.362	1325200	1	17.6877	17.4154
151	APOO	Q9BUR5	Apolipoprotein O	22.284	2	2	2	10.6	10.6	10.6	0	4.1062	14322000	2	20.5145	19.9195
152	APOOL	Q6UXV4	MICOS complex subunit MIC27	29.159	3	3	3	17.2	17.2	17.2	0	4.0113	24015000	3	20.2404	22.0839
153	APPL1	Q9UKG1	DCC-interacting protein 13-alpha	79.663	2	2	2	3.4	3.4	3.4	0.000383	2.7258	6288000	1	18.8263	19.5406
154	APRT	P07741	Adenine phosphoribosyltransferase	19.608	9	9	9	57.2	57.2	57.2	0	67.875	306610000	21	24.7659	24.9682
155	AQR	O60306	Intron-binding protein aquarius	171.29	5	5	5	4.9	4.9	4.9	0	6.4799	36536000	3	21.3848	21.2368
156	ARAP1	Q96P48	Arf-GAP with Rho-GAP domain, ANK repeat and PH domain-containing protein 1	162.19	1	1	1	1	1	1	0	6.5834	10487000	2	18.5259	18.0354
157	ARCN1	P48444	Coatomer subunit delta	57.21	18	18	18	39.3	39.3	39.3	0	127.38	1352200000	57	27.3289	27.4207
158	ARF1;ARF3	F5H423;P84077;P61204	ADP-ribosylation factor 1;ADP-ribosylation factor 3	23.346	2	2	2	8.6	8.6	8.6	0	5.6775	42655000	6	22.3969	22.2602
159	ARF4	P18085	ADP-ribosylation factor 4	20.511	2	2	2	8.3	8.3	8.3	0	3.3687	27413000	5	21.394	21.2995
160	ARFGAP2	Q8N6H7	ADP-ribosylation factor GTPase-activating protein 2	56.72	1	1	1	2.1	2.1	2.1	0.00071403	2.1909	7132300	1	19.4458	20.822
161	ARHGAP1	Q07960	Rho GTPase-activating protein 1	50.435	2	2	2	5.9	5.9	5.9	0.00039062	2.8855	10415000	4	20.596	20.5609
162	ARHGAP17	Q68EM7	Rho GTPase-activating protein 17	95.436	4	4	4	7.7	7.7	7.7	0	6.8362	47313000	5	18.5288	21.8462
163	ARHGAP35	Q9NRY4	Rho GTPase-activating protein 35	170.51	3	3	3	2.5	2.5	2.5	0	8.4005	10601000	4	21.4821	21.1682
164	ARHGAP5	Q13017	Rho GTPase-activating protein 5	172.46	1	1	1	0.8	0.8	0.8	0.00071276	2.1765	3925100	1	18.052	19.639
165	ARHGDIA	P52565	Rho GDP-dissociation inhibitor 1	23.207	3	3	3	24	24	24	0	9.6688	42506000	5	22.9798	22.8308
166	ARHGEF1	Q92888	Rho guanine nucleotide exchange factor 1	102.43	5	5	5	6.7	6.7	6.7	0	11.394	64599000	7	24.2609	24.2743
167	ARHGEF2	Q92974	Rho guanine nucleotide exchange factor 2	111.54	20	20	20	28.8	28.8	28.8	0	103.7	427150000	33	25.325	25.0937
168	ARHGEF6;ARHGEF7	Q15052;Q14155	Rho guanine nucleotide exchange factor 6;Rho guanine nucleotide exchange factor 7	87.498	2	2	2	3.5	3.5	3.5	0.00037552	2.576	5310600	1	19.6053	17.9704
169	ARID1A	O14497	AT-rich interactive domain-containing protein 1A	242.04	3	3	3	2.5	2.5	2.5	0	4.3881	18581000	4	21.2624	21.1678
170	ARIH1	Q9Y4X5	E3 ubiquitin-protein ligase ARIH1	64.117	6	6	6	10.6	10.6	10.6	0	18.23	55755000	10	23.1616	22.9237
171	ARIH2	O95376	E3 ubiquitin-protein ligase ARIH2	57.818	3	3	3	7.9	7.9	7.9	0	10.275	59471000	4	19.3555	23.0826
172	ARL1	P40616	ADP-ribosylation factor-like protein 1	20.417	2	2	2	16.6	16.6	16.6	0	8.2392	21521000	6	19.8993	21.3219
173	ARL2	P36404;V9GYD0	ADP-ribosylation factor-like protein 2	20.878	6	6	6	39.7	39.7	39.7	0	24.327	161400000	6	23.5235	23.7282
174	ARL6IP4	Q66PJ3	ADP-ribosylation factor-like protein 6-interacting protein 4	44.915	4	4	4	11.9	11.9	11.9	0	20.27	81930000	10	23.1982	23.3048
175	ARL8A	Q96BM9	ADP-ribosylation factor-like protein 8A	21.416	2	1	1	12.4	7.5	7.5	0.0010534	2.0765	8455500	2	20.1011	20.4687
176	ARL8B	Q9NVJ2	ADP-ribosylation factor-like protein 8B	21.539	2	2	1	9.7	9.7	4.8	0	4.4538	66668000	8	24.1852	24.4421
177	ARMC1	Q9NVT9	Armadillo repeat-containing protein 1	31.28	3	3	3	20.6	20.6	20.6	0	11.29	64760000	5	22.5757	22.6346
178	ARMC6	Q6NXE6	Armadillo repeat-containing protein 6	54.141	5	5	5	23	23	23	0	14.057	158070000	9	24.8401	24.9976
179	ARMC8	Q8IUR7	Armadillo repeat-containing protein 8	75.509	1	1	1	2.5	2.5	2.5	0	8.2172	10486000	2	19.5727	18.5501
180	ARPC1A	Q92747	Actin-related protein 2/3 complex subunit 1A	41.569	7	1	1	24.1	2.7	2.7	0.0007215	2.2843	39009000	3	17.9222	21.9348
181	ARPC1B	O15143	Actin-related protein 2/3 complex subunit 1B	40.949	6	2	2	18.8	5.4	5.4	0	3.8415	31182000	3	22.4702	22.0117
182	ARPC2	O15144	Actin-related protein 2/3 complex subunit 2	34.333	8	8	8	32	32	32	0	10.315	116880000	9	22.9805	23.159
183	ARPC3	O15145	Actin-related protein 2/3 complex subunit 3	20.546	4	4	4	25.8	25.8	25.8	0	15.923	192730000	13	24.8324	24.824
184	ARPC4;ARPC4-TTLL3	P59998;A0A0A6YYG9	Actin-related protein 2/3 complex subunit 4	19.667	5	5	5	29.8	29.8	29.8	0	37.421	300870000	14	23.433	23.6384
185	ARPC5	O15511	Actin-related protein 2/3 complex subunit 5	16.32	1	1	1	7.9	7.9	7.9	0.0045293	1.5226	32695000	4	20.6429	18.2011
186	ARPC5L	Q9BPX5	Actin-related protein 2/3 complex subunit 5-like protein	16.941	1	1	1	8.5	8.5	8.5	0.00037864	2.6276	2424700	1	18.6188	19.259
187	ARRB1	P49407	Beta-arrestin-1	47.065	2	2	2	4.5	4.5	4.5	0.002996	1.6801	7670200	1	19.6204	18.8009
188	ARRB2	P32121	Beta-arrestin-2	46.105	2	2	2	4.6	4.6	4.6	0	4.7432	22577000	6	19.5253	19.2083
189	ASCC1	Q8N9N2	Activating signal cointegrator 1 complex subunit 1	45.509	3	3	3	7.2	7.2	7.2	0	4.7827	35872000	2	21.7231	19.8502
190	ASCC2	Q9H1I8	Activating signal cointegrator 1 complex subunit 2	86.359	6	6	6	15.6	15.6	15.6	0	33.682	48487000	9	21.9057	21.5373
191	ASCC3	Q8N3C0	Activating signal cointegrator 1 complex subunit 3	251.46	52	52	52	32.5	32.5	32.5	0	198.35	1619100000	124	27.3763	27.2222
192	ASH2L	Q9UBL3	Set1/Ash2 histone methyltransferase complex subunit ASH2	68.722	1	1	1	2.5	2.5	2.5	0.00037175	2.4998	18793000	4	23.2417	22.5865
193	ASNA1	O43681	ATPase ASNA1	38.792	1	1	1	2.6	2.6	2.6	0.001375	1.9296	5493700	1	18.5869	18.7564
194	ASNS	P08243	Asparagine synthetase [glutamine-hydrolyzing]	64.369	23	23	23	55.3	55.3	55.3	0	67.761	978910000	57	26.1008	26.2944
195	ASPH	Q12797	Aspartyl/asparaginyl beta-hydroxylase	85.862	3	3	3	4.6	4.6	4.6	0	4.8586	35101000	4	22.7218	22.7734
196	ASPM	Q8IZT6	Abnormal spindle-like microcephaly-associated protein	409.8	2	2	2	1	1	1	0.0081581	1.3253	7360800	1	20.1856	19.8849
197	ASPSCR1	Q9BZE9	Tether containing UBX domain for GLUT4	60.182	4	4	4	14.6	14.6	14.6	0	8.4094	55462000	8	24.1649	24.335
198	ASS1	P00966	Argininosuccinate synthase	46.53	4	4	4	13.1	13.1	13.1	0	8.6801	18411000	4	20.1996	20.3082
199	ASUN	Q9NVM9	Protein asunder homolog	80.224	3	3	3	8.6	8.6	8.6	0	13.428	16984000	3	19.1277	18.9624
200	ATAD1	Q8NBU5	ATPase family AAA domain-containing protein 1	40.744	3	3	3	15.2	15.2	15.2	0	14.249	69852000	5	22.3662	22.6502
201	ATAD3A	Q9NVI7	ATPase family AAA domain-containing protein 3A	71.368	50	50	15	61.7	61.7	27.4	0	323.31	34960000000	463	31.017	31.0532
202	ATAD3B	Q5T9A4	ATPase family AAA domain-containing protein 3B	72.572	43	14	11	50.2	20.7	14.5	0	243.15	2898000000	87	27.5563	27.4097
203	ATAD5	Q96QE3	ATPase family AAA domain-containing protein 5	207.57	3	3	3	2.1	2.1	2.1	0	4.9055	7634100	3	20.8726	21.0372
204	ATE1	O95260	Arginyl-tRNA--protein transferase 1	59.09	2	2	2	5.2	5.2	5.2	0	7.5243	14792000	4	21.835	22.4124
205	ATG16L1	Q676U5	Autophagy-related protein 16-1	68.264	2	2	2	7.6	7.6	7.6	0	55.883	13077000	2	20.5501	19.2792
206	ATG2A	Q2TAZ0	Autophagy-related protein 2 homolog A	212.86	2	2	2	1	1	1	0.00039108	2.9016	7797300	2	19.7023	19.9426
207	ATG4B	Q9Y4P1	Cysteine protease ATG4B	44.294	1	1	1	3.8	3.8	3.8	0	4.4802	39919000	2	20.056	17.9805
208	ATG4C	Q96DT6	Cysteine protease ATG4C	52.497	1	1	1	2.8	2.8	2.8	0	3.6618	6653200	2	20.1825	19.427
209	ATG5	Q9H1Y0	Autophagy protein 5	32.447	2	2	2	10.2	10.2	10.2	0	6.8807	18331000	4	21.5658	21.289
210	ATG7	O95352	Ubiquitin-like modifier-activating enzyme ATG7	77.959	2	2	2	5.3	5.3	5.3	0	21.964	26027000	4	19.5801	19.657
211	ATG9A	Q7Z3C6;H7C152	Autophagy-related protein 9A	94.446	3	3	3	5.2	5.2	5.2	0	9.7057	22673000	3	22.049	22.074
212	ATIC	P31939	Bifunctional purine biosynthesis protein PURH;Phosphoribosylaminoimidazolecarboxamide formyltransferase;IMP cyclohydrolase	64.615	6	6	6	12.2	12.2	12.2	0	7.1111	45191000	4	22.6086	22.3301
213	ATL2;ATL1	Q8NHH9;Q8WXF7	Atlastin-2;Atlastin-1	66.228	2	2	2	4.5	4.5	4.5	0.002681	1.7448	13462000	1	19.3157	20.2561
214	ATL3	Q6DD88	Atlastin-3	60.541	3	3	3	7.4	7.4	7.4	0	5.1453	21006000	4	21.1898	20.9299
215	ATM	Q13315	Serine-protein kinase ATM	350.68	3	3	3	1.2	1.2	1.2	0	5.6965	11179000	3	22.4	22.07
216	ATP13A1	Q9HD20	Manganese-transporting ATPase 13A1	132.95	4	4	4	3.2	3.2	3.2	0	7.2968	63683000	8	24.9668	24.8492
217	ATP1A1	P05023;A0A2R8YEY8;P13637;P50993;Q13733;P20648	Sodium/potassium-transporting ATPase subunit alpha-1	112.89	38	38	35	40.5	40.5	38.4	0	323.31	3416900000	146	28.2847	28.3235
218	ATP1B3	P54709	Sodium/potassium-transporting ATPase subunit beta-3	31.512	6	6	6	35.5	35.5	35.5	0	16.52	373460000	20	23.8682	24.2392
219	ATP2A2	P16615;O14983;Q93084	Sarcoplasmic/endoplasmic reticulum calcium ATPase 2	114.76	24	24	24	26.2	26.2	26.2	0	120.29	1221200000	73	27.1029	27.092
220	ATP2B1	P20020;P23634;Q01814;Q16720	Plasma membrane calcium-transporting ATPase 1	134.68	7	7	7	8.4	8.4	8.4	0	21.924	134760000	11	23.9418	23.8851
221	ATP2C1	P98194	Calcium-transporting ATPase type 2C member 1	100.58	2	2	2	3.7	3.7	3.7	0	10.219	20598000	4	21.6407	21.1408
222	ATP5A1	P25705	ATP synthase subunit alpha, mitochondrial	59.75	25	25	25	54.8	54.8	54.8	0	304.45	4252100000	129	28.0197	28.1421
223	ATP5B	P06576	ATP synthase subunit beta, mitochondrial	56.559	17	17	17	53.7	53.7	53.7	0	162.77	2293500000	59	26.4105	26.7659
224	ATP5C1	P36542	ATP synthase subunit gamma, mitochondrial	32.996	10	10	10	42.6	42.6	42.6	0	49.882	619330000	25	26.2637	26.1805
225	ATP5D	P30049	ATP synthase subunit delta, mitochondrial	17.49	2	2	2	13.7	13.7	13.7	0	4.7554	79324000	6	24.8294	25.0249
226	ATP5F1	P24539	ATP synthase F(0) complex subunit B1, mitochondrial	28.908	5	5	5	23.4	23.4	23.4	0	60.585	219680000	18	24.2588	24.3321
227	ATP5H	O75947	ATP synthase subunit d, mitochondrial	18.491	6	6	6	31.1	31.1	31.1	0	13.912	200770000	20	25.5705	25.5591
228	ATP5I	P56385	ATP synthase subunit e, mitochondrial	7.9331	1	1	1	14.5	14.5	14.5	0.00036377	2.3377	169300000	7	25.9231	19.1832
229	ATP5J	P18859	ATP synthase-coupling factor 6, mitochondrial	12.587	3	3	3	31.5	31.5	31.5	0	19.739	47801000	8	22.5485	22.7869
230	ATP5J2-PTCD1;ATP5J2	G3V325;P56134	ATP synthase subunit f, mitochondrial	84.109	3	3	3	4.4	4.4	4.4	0	10.439	286070000	11	24.3934	24.6337
231	ATP5L	O75964	ATP synthase subunit g, mitochondrial	11.428	4	4	4	42.7	42.7	42.7	0	14.708	129160000	9	22.1349	22.0694
232	ATP5O	P48047;H7C0C1	ATP synthase subunit O, mitochondrial	23.277	6	6	6	38.5	38.5	38.5	0	43.666	429220000	14	24.0764	24.2127
233	ATP6V0A1	Q93050	V-type proton ATPase 116 kDa subunit a isoform 1	96.412	3	3	3	4.4	4.4	4.4	0	5.8918	19673000	6	20.7599	20.9286
234	ATP6V0D1	P61421	V-type proton ATPase subunit d 1	40.329	3	3	3	8.3	8.3	8.3	0	6.1082	54185000	3	20.5947	18.1277
235	ATP6V1A	P38606	V-type proton ATPase catalytic subunit A	68.303	2	2	2	4.1	4.1	4.1	0	17.123	26906000	3	20.6981	20.5266
236	ATP6V1E1	P36543;Q96A05	V-type proton ATPase subunit E 1	26.145	3	3	3	14.2	14.2	14.2	0	6.2543	21611000	3	23.2104	23.2243
237	ATP6V1F	Q16864	V-type proton ATPase subunit F	13.37	3	3	3	48.7	48.7	48.7	0	39.088	91631000	7	22.8393	22.7698
238	ATP6V1H	Q9UI12	V-type proton ATPase subunit H	55.882	5	5	5	17.2	17.2	17.2	0	25.456	96289000	9	24.03	23.6351
239	ATRX	P46100	Transcriptional regulator ATRX	282.58	5	5	5	2.6	2.6	2.6	0	7.8333	67685000	7	24.1464	23.905
240	ATXN10	Q9UBB4	Ataxin-10	53.488	11	11	11	28.2	28.2	28.2	0	90.253	236770000	22	24.8264	25.0229
241	ATXN1L	P0C7T5	Ataxin-1-like	73.305	4	4	4	7.8	7.8	7.8	0	13.032	52585000	8	23.1368	22.9425
242	ATXN2	Q99700	Ataxin-2	140.28	15	15	15	15.9	15.9	15.9	0	77.461	534520000	45	26.1268	25.9682
243	ATXN2L	Q8WWM7	Ataxin-2-like protein	113.37	36	36	36	38	38	38	0	323.31	5359900000	157	29.594	29.2654
244	ATXN3	P54252	Ataxin-3	41.25	2	2	2	7.2	7.2	7.2	0	3.6605	13669000	2	19.3971	22.4404
245	ATXN7L3B	Q96GX2	Putative ataxin-7-like protein 3B	10.771	1	1	1	10.3	10.3	10.3	0.0078616	1.3313	1868900	0	19.8338	19.541
246	AURKA	O14965	Aurora kinase A	45.809	1	1	1	5	5	5	0	4.3365	14472000	2	21.2957	18.9469
247	AURKB	Q96GD4	Aurora kinase B	39.31	2	2	2	8.1	8.1	8.1	0.0003973	3.0241	13488000	4	20.1901	19.959
248	AXIN1	O15169	Axin-1	95.634	1	1	1	2.1	2.1	2.1	0.0050972	1.4211	5273000	2	21.2346	19.6825
249	BABAM1	Q9NWV8	BRISC and BRCA1-A complex member 1	36.56	2	2	2	14.9	14.9	14.9	0	25.727	23568000	4	22.6831	22.6671
250	BAG6	P46379	Large proline-rich protein BAG6	119.41	3	3	3	4.9	4.9	4.9	0	5.2624	17281000	4	20.6577	20.6069
251	BAIAP2L1	Q9UHR4	Brain-specific angiogenesis inhibitor 1-associated protein 2-like protein 1	56.882	2	2	2	5.1	5.1	5.1	0	4.906	22055000	3	22.886	23.3366
252	BANF1	O75531	Barrier-to-autointegration factor;Barrier-to-autointegration factor, N-terminally processed	10.058	2	2	2	40.4	40.4	40.4	0	5.1115	118490000	6	22.3125	22.4186
253	BASP1	P80723	Brain acid soluble protein 1	22.693	6	6	6	54.2	54.2	54.2	0	21.61	130210000	14	25.4351	25.2882
254	BAZ1A	Q9NRL2	Bromodomain adjacent to zinc finger domain protein 1A	178.7	11	11	11	9.9	9.9	9.9	0	39.82	175170000	24	24.9277	24.8936
255	BAZ1B	Q9UIG0	Tyrosine-protein kinase BAZ1B	170.9	6	6	6	6.2	6.2	6.2	0	8.2541	40761000	6	23.0136	22.7707
256	BAZ2A	Q9UIF9	Bromodomain adjacent to zinc finger domain protein 2A	211.2	4	4	4	3	3	3	0	31.794	49116000	8	23.9051	24.0286
257	BCAP31	P51572	B-cell receptor-associated protein 31	27.991	9	9	9	26.4	26.4	26.4	0	45.433	905080000	47	27.5787	27.8001
258	BCAS2	O75934	Pre-mRNA-splicing factor SPF27	26.131	6	6	6	37.3	37.3	37.3	0	29.592	411990000	28	26.9189	26.5607
259	BCAT2	O15382	Branched-chain-amino-acid aminotransferase, mitochondrial	44.287	1	1	1	2.6	2.6	2.6	0	3.8731	6345600	2	18.6529	18.2982
260	BCCIP	Q9P287	BRCA2 and CDKN1A-interacting protein	35.979	5	5	5	21.7	21.7	21.7	0	13.486	216670000	12	24.8004	25.1274
261	BCKDHA	F5H5P2;P12694	2-oxoisovalerate dehydrogenase subunit alpha, mitochondrial	54.202	3	3	3	8.8	8.8	8.8	0.00036684	2.3977	29436000	1	20.3427	19.5715
262	BCKDK	O14874	[3-methyl-2-oxobutanoate dehydrogenase [lipoamide]] kinase, mitochondrial	46.36	5	5	5	19.7	19.7	19.7	0	13.398	49891000	6	20.7332	20.8477
263	BCLAF1	Q9NYF8	Bcl-2-associated transcription factor 1	106.12	9	9	9	14.8	14.8	14.8	0	14.218	118980000	13	23.0769	23.2823
264	BCOR	Q6W2J9	BCL-6 corepressor	192.19	3	3	3	2.5	2.5	2.5	0.00037821	2.6218	36324000	4	22.4776	22.3619
265	BCR	P11274	Breakpoint cluster region protein	142.82	3	3	3	3	3	3	0	7.2512	31239000	4	22.1629	22.0413
266	BCS1L	Q9Y276	Mitochondrial chaperone BCS1	47.534	5	5	5	16.7	16.7	16.7	0	16.095	108900000	9	23.4453	23.7545
267	BECN1	Q14457	Beclin-1	51.896	2	2	2	4	4	4	0	3.4044	18150000	4	22.9407	22.9026
268	BEND3	Q5T5X7	BEN domain-containing protein 3	94.474	1	1	1	2.1	2.1	2.1	0.00036403	2.3401	9696800	1	19.4909	19.6329
269	BIRC6	Q9NR09	Baculoviral IAP repeat-containing protein 6	530.25	4	4	4	1	1	1	0	6.8133	34889000	6	23.2413	23.4147
270	BLM	P54132	Bloom syndrome protein	159	2	2	2	2.5	2.5	2.5	0	4.1772	16715000	3	20.5216	20.3969
271	BLOC1S2	Q6QNY1	Biogenesis of lysosome-related organelles complex 1 subunit 2	15.961	1	1	1	7.7	7.7	7.7	0.00037636	2.5948	3478200	1	19.0688	17.5839
272	BLVRA	P53004	Biliverdin reductase A	33.428	8	8	8	34.5	34.5	34.5	0	49.287	165860000	10	23.6155	23.4333
273	BMP2K	Q9NSY1	BMP-2-inducible protein kinase	129.17	1	1	1	1	1	1	0.0010399	1.987	7549400	2	21.9087	18.2734
274	BNIP1	Q12981	Vesicle transport protein SEC20	26.132	3	3	3	11.8	11.8	11.8	0	5.6845	38223000	8	23.3081	23.5543
275	BOLA2	H3BVE0;Q9H3K6	BolA-like protein 2	27.554	1	1	1	6.4	6.4	6.4	0	7.9578	58472000	5	23.7884	19.3961
276	BOP1	Q14137	Ribosome biogenesis protein BOP1	83.629	6	6	6	13.3	13.3	13.3	0	59.198	141030000	12	23.2155	23.1095
277	BPNT1	O95861	3(2),5-bisphosphate nucleotidase 1	33.392	1	1	1	4.2	4.2	4.2	0.0036137	1.5955	15462000	2	19.0307	19.9194
278	BPTF	Q12830	Nucleosome-remodeling factor subunit BPTF	338.26	15	15	15	5.8	5.8	5.8	0	31.602	116460000	18	24.9009	24.8133
279	BRAP	Q7Z569	BRCA1-associated protein	67.304	5	5	5	11.7	11.7	11.7	0	11.055	93266000	10	25.0103	25.2698
280	BRCC3	P46736	Lys-63-specific deubiquitinase BRCC36	36.072	4	4	4	19.9	19.9	19.9	0	6.3998	21656000	4	20.9416	20.8267
281	BRD2	P25440	Bromodomain-containing protein 2	88.06	9	8	8	15.9	14.2	14.2	0	21.852	134710000	17	24.1129	24.2418
282	BRD4	O60885;Q15059	Bromodomain-containing protein 4	152.22	20	20	19	18.3	18.3	17.3	0	52.416	1088600000	64	27.4934	27.4368
283	BRE	Q9NXR7	BRCA1-A complex subunit BRE	43.551	2	2	2	6.3	6.3	6.3	0	4.6638	27720000	2	20.5587	20.8009
284	BRIX1	Q8TDN6	Ribosome biogenesis protein BRX1 homolog	41.401	4	4	4	12.7	12.7	12.7	0	7.5342	24902000	4	21.9951	22.3262
285	BRK1	Q8WUW1	Protein BRICK1	8.7448	1	1	1	12	12	12	0.002997	1.681	17410000	2	22.8805	18.8289
286	BROX	Q5VW32	BRO1 domain-containing protein BROX	46.476	1	1	1	2.7	2.7	2.7	0.0010475	2.0318	4167100	1	19.1229	19.5672
287	BSG	P35613	Basigin	42.2	7	7	7	23.4	23.4	23.4	0	40.031	497000000	28	25.6839	25.7242
288	BTAF1	O14981	TATA-binding protein-associated factor 172	206.89	8	8	8	6.3	6.3	6.3	0	16.402	123480000	12	23.3724	23.186
289	BUB1	O43683	Mitotic checkpoint serine/threonine-protein kinase BUB1	122.37	3	3	3	3.7	3.7	3.7	0	5.084	33156000	6	22.1095	21.4403
290	BUB1B	O60566	Mitotic checkpoint serine/threonine-protein kinase BUB1 beta	119.54	7	7	7	10.2	10.2	10.2	0	31.084	77326000	10	24.1903	24.0471
291	BUB3	O43684	Mitotic checkpoint protein BUB3	37.154	11	11	11	38.4	38.4	38.4	0	110.06	1658200000	66	26.6398	26.6886
292	BUD31	P41223	Protein BUD31 homolog	17	2	2	2	14.6	14.6	14.6	0	3.4771	13101000	1	20.451	19.1958
293	BYSL	Q13895	Bystin	49.601	7	7	7	20.1	20.1	20.1	0	12.553	133280000	12	25.046	25.1179
294	BZW2	Q9Y6E2	Basic leucine zipper and W2 domain-containing protein 2	48.162	6	6	6	18.6	18.6	18.6	0	32.124	68527000	13	22.8523	23.123
295	C12orf10	Q9HB07	UPF0160 protein MYG1, mitochondrial	42.449	1	1	1	3.2	3.2	3.2	0.00037258	2.5094	5971100	2	18.5721	19.4034
296	C14orf166	Q9Y224	UPF0568 protein C14orf166	28.068	10	10	10	47.5	47.5	47.5	0	166.71	732570000	31	25.4024	25.5227
297	C15orf39	Q6ZRI6	Uncharacterized protein C15orf39	110.67	2	2	2	2.7	2.7	2.7	0.00037922	2.6391	9994300	3	20.0079	19.7271
298	C17orf59	Q96GS4	Uncharacterized protein C17orf59	37.226	1	1	1	5	5	5	0.00037037	2.467	7309400	2	21.6075	18.865
299	C17orf75	Q9HAS0	Protein Njmu-R1	44.621	2	2	2	6.1	6.1	6.1	0	3.2136	21609000	5	19.2613	21.5926
300	C18orf63	Q68DL7	Uncharacterized protein C18orf63	77.23	1	1	1	1	1	1	0.0051069	1.4305	248070000	21	26.2229	18.8339
301	C19orf25	Q9UFG5	UPF0449 protein C19orf25	12.878	1	1	1	16.9	16.9	16.9	0	9.6369	25215000	2	19.6135	18.7659
302	C1orf123	Q9NWV4	UPF0587 protein C1orf123	18.048	1	1	1	10.6	10.6	10.6	0	3.2812	35098000	2	19.9038	18.1507
303	C1QBP	Q07021	Complement component 1 Q subcomponent-binding protein, mitochondrial	31.362	9	9	9	53.5	53.5	53.5	0	219.46	755160000	33	25.4251	25.5362
304	C21orf2	O43822	Protein C21orf2	28.34	2	2	2	10.5	10.5	10.5	0	3.5972	10269000	4	22.2903	22.4682
305	C2CD5	Q86YS7	C2 domain-containing protein 5	110.45	2	2	2	2.4	2.4	2.4	0.00037106	2.4792	22675000	3	22.6236	22.9233
306	C3orf58	Q8NDZ4	Deleted in autism protein 1	49.481	1	1	1	3.5	3.5	3.5	0.0098826	1.2387	23668000	2	22.1794	20.3736
307	C4A;C4B	P0C0L4;P0C0L5	Complement C4-A;Complement C4 beta chain;Complement C4-A alpha chain;C4a anaphylatoxin;C4b-A;C4d-A;Complement C4 gamma chain;Complement C4-B;Complement C4 beta chain;Complement C4-B alpha chain;C4a anaphylatoxin;C4b-B;C4d-B;Complement C4 gamma chain	192.78	4	4	3	3.3	3.3	2.6	0	50.951	514380000	13	25.2959	25.0833
308	C4orf27	Q9NWY4;A8MVJ9	UPF0609 protein C4orf27	39.436	5	5	5	16.5	16.5	16.5	0	10.479	98402000	8	24.9002	24.9485
309	C4orf3	Q8WVX3	Uncharacterized protein C4orf3	7.6035	1	1	1	16.7	16.7	16.7	0.00038344	2.7328	10760000	2	20.8675	17.8589
310	C4orf32	Q8N8J7	Uncharacterized protein C4orf32	14.652	2	2	2	30.3	30.3	30.3	0	12.62	23539000	3	23.1163	23.7848
311	C5orf42	Q9H799	Uncharacterized protein C5orf42	361.74	2	2	2	1	1	1	0.0053814	1.3814	97522000	2	22.5597	22.3765
312	C5orf45	Q6NTE8	UPF0544 protein C5orf45	37.743	1	1	1	6.7	6.7	6.7	0	10.568	7455900	2	20.6587	20.1116
313	C5orf51	A6NDU8	UPF0600 protein C5orf51	33.62	1	1	1	3.1	3.1	3.1	0	5.4623	6023600	2	20.5866	19.8123
314	C7orf55	Q96HJ9	UPF0562 protein C7orf55	12.749	1	1	1	9.7	9.7	9.7	0.00038314	2.7287	12008000	2	19.4222	19.3986
315	C8orf33	Q9H7E9	UPF0488 protein C8orf33	24.992	3	3	3	13.1	13.1	13.1	0.00036153	2.303	21702000	3	17.5806	20.1248
316	C8orf82	Q6P1X6	UPF0598 protein C8orf82	23.889	1	1	1	6.9	6.9	6.9	0.00037764	2.6142	19203000	1	20.4637	18.0925
317	C9orf114	Q5T280	Putative methyltransferase C9orf114	42.008	1	1	1	3.7	3.7	3.7	0.00040469	3.1227	52596000	4	24.7373	24.6874
318	C9orf41	Q8N4J0	UPF0586 protein C9orf41	47.185	3	3	3	8.3	8.3	8.3	0	6.9687	44045000	4	22.8577	23.257
319	C9orf64	Q5T6V5	UPF0553 protein C9orf64	39.028	2	2	2	7.6	7.6	7.6	0	5.3813	44591000	9	21.6947	21.6063
320	CAB39	Q9Y376	Calcium-binding protein 39	39.869	1	1	1	3.8	3.8	3.8	0.00036819	2.4265	11234000	1	19.3234	19.0463
321	CACYBP	Q9HB71	Calcyclin-binding protein	26.21	1	1	1	5.7	5.7	5.7	0	9.0025	11620000	3	21.6539	19.6991
322	CAD	P27708;P31327	CAD protein;Glutamine-dependent carbamoyl-phosphate synthase;Aspartate carbamoyltransferase;Dihydroorotase	242.98	60	60	60	35.9	35.9	35.9	0	323.31	4169200000	199	28.4803	28.4651
323	CADM1	Q9BY67	Cell adhesion molecule 1	48.509	1	1	1	6.8	6.8	6.8	0	4.7505	4665000	1	18.4952	19.101
324	CAMK2D	Q13557	Calcium/calmodulin-dependent protein kinase type II subunit delta	56.369	5	5	3	13.8	13.8	7.6	0	34.334	142370000	11	23.6544	23.8167
325	CAMK2G;CAMK2B	Q13555;Q13554	Calcium/calmodulin-dependent protein kinase type II subunit gamma;Calcium/calmodulin-dependent protein kinase type II subunit beta	62.606	4	2	2	10.8	5.2	5.2	0.00036232	2.3064	16083000	2	20.4364	19.1548
326	CAMSAP2	Q08AD1	Calmodulin-regulated spectrin-associated protein 2	168.09	1	1	1	0.9	0.9	0.9	0.0010575	2.095	4247300	1	21.1434	19.2019
327	CAMSAP3	Q9P1Y5	Calmodulin-regulated spectrin-associated protein 3	134.75	1	1	1	3	3	3	0	3.9317	7017500	1	20.6557	18.0423
328	CAND1	Q86VP6;O75155	Cullin-associated NEDD8-dissociated protein 1	136.37	35	35	35	37.8	37.8	37.8	0	211.74	2061100000	120	27.742	27.9439
329	CANX	P27824	Calnexin	67.567	24	24	24	51.2	51.2	51.2	0	256.06	1005300000	69	26.3079	26.5793
330	CAP1	Q01518;P40123	Adenylyl cyclase-associated protein 1	51.901	13	13	13	43.6	43.6	43.6	0	56.311	283630000	36	25.3713	25.3696
331	CAPN1	P07384	Calpain-1 catalytic subunit	81.889	6	6	6	9.8	9.8	9.8	0	11.2	89240000	11	22.8753	22.8843
332	CAPN2	P17655	Calpain-2 catalytic subunit	79.994	8	8	8	17.1	17.1	17.1	0	39.8	135510000	11	22.613	22.8552
333	CAPN7	Q9Y6W3	Calpain-7	92.651	2	2	2	3.4	3.4	3.4	0.0010586	2.1	15370000	3	21.5702	19.7329
334	CAPNS1	P04632;Q96L46	Calpain small subunit 1	28.315	6	6	6	34	34	34	0	15.457	162290000	15	24.7559	24.7889
335	CAPZA1	P52907	F-actin-capping protein subunit alpha-1	32.922	12	12	10	59.8	59.8	50.3	0	67.866	532020000	30	26.9899	26.9158
336	CAPZA2	P47755	F-actin-capping protein subunit alpha-2	32.949	3	1	1	14.3	4.9	4.9	0	15.181	10124000	3	18.7138	21.2171
337	CAPZB	P47756	F-actin-capping protein subunit beta	31.35	7	7	7	31.8	31.8	31.8	0	17.923	260940000	12	23.7851	23.9111
338	CARM1	Q86X55	Histone-arginine methyltransferase CARM1	65.853	6	6	6	11.8	11.8	11.8	0	15.5	251060000	12	23.6613	24.0546
339	CARS	P49589	Cysteine--tRNA ligase, cytoplasmic	85.472	4	4	4	5.9	5.9	5.9	0	8.3425	43655000	5	23.4697	23.632
340	CASC3	O15234	Protein CASC3	76.277	6	6	6	11.2	11.2	11.2	0	16.168	108010000	7	18.2752	22.9273
341	CASC5	Q8NG31	Protein CASC5	265.39	1	1	1	0.8	0.8	0.8	0.00040339	3.1046	5044600	1	18.9218	19.9227
342	CASP3	P42574	Caspase-3;Caspase-3 subunit p17;Caspase-3 subunit p12	31.608	1	1	1	4	4	4	0	4.7929	28419000	2	18.1803	23.7373
343	CASP7	P55210	Caspase-7;Caspase-7 subunit p20;Caspase-7 subunit p11	34.276	2	2	2	12.2	12.2	12.2	0	25.113	25022000	4	21.3178	22.3395
344	CASZ1	Q86V15	Zinc finger protein castor homolog 1	190.07	2	2	2	1.4	1.4	1.4	0.00539	1.39	7900600	1	20.857	19.7776
345	CAT	P04040	Catalase	59.755	12	12	12	37	37	37	0	26.335	223950000	24	23.9048	23.8445
346	CBFB	Q13951	Core-binding factor subunit beta	21.508	2	2	2	12.6	12.6	12.6	0	34.979	63585000	6	22.7287	22.3168
347	CBR1	P16152	Carbonyl reductase [NADPH] 1	30.375	10	10	8	47.7	47.7	37.2	0	176.79	917450000	46	25.3375	25.2065
348	CBR3	O75828	Carbonyl reductase [NADPH] 3	30.85	4	2	2	19.5	9	9	0	47.797	101720000	2	22.1913	18.1064
349	CBS	P0DN79;P35520	Cystathionine beta-synthase	60.586	10	10	10	28.3	28.3	28.3	0	55.417	307090000	25	24.5549	24.4364
350	CBWD2;CBWD1;CBWD5;CBWD3;CBWD6	Q8IUF1;Q9BRT8;Q5RIA9;Q5JTY5;Q4V339	COBW domain-containing protein 2;COBW domain-containing protein 1;COBW domain-containing protein 5;COBW domain-containing protein 3;COBW domain-containing protein 6	44.034	2	2	2	6.6	6.6	6.6	0	3.3336	6843900	3	21.7327	19.4338
351	CBX1	P83916	Chromobox protein homolog 1	21.418	4	3	3	24.3	15.7	15.7	0	7.7446	22439000	6	22.5373	22.4194
352	CBX3	Q13185	Chromobox protein homolog 3	20.811	5	5	4	24.6	24.6	15.8	0	23.202	236170000	24	25.8729	25.5225
353	CBX5	P45973	Chromobox protein homolog 5	22.225	3	3	3	18.8	18.8	18.8	0	5.5449	90026000	6	22.653	22.6772
354	CBX8;CBX6	Q9HC52;O95503	Chromobox protein homolog 8;Chromobox protein homolog 6	43.395	1	1	1	2.3	2.3	2.3	0.0093516	1.2825	1995300	0	18.0763	18.8494
355	CC2D1A	Q6P1N0	Coiled-coil and C2 domain-containing protein 1A	104.06	5	5	5	6.3	6.3	6.3	0	7.0955	20317000	6	21.1207	21.145
356	CCAR1	Q8IX12	Cell division cycle and apoptosis regulator protein 1	132.82	3	3	3	3.5	3.5	3.5	0	4.5311	17931000	4	20.8939	17.9789
357	CCAR2	Q8N163	Cell cycle and apoptosis regulator protein 2	102.9	13	13	13	24.5	24.5	24.5	0	53.043	278770000	37	24.9636	25.0018
358	CCBL2	Q6YP21	Kynurenine--oxoglutarate transaminase 3	51.4	1	1	1	2.6	2.6	2.6	0.0013793	1.9533	20800000	4	21.8335	20.6418
359	CCDC115	Q96NT0	Coiled-coil domain-containing protein 115	19.76	3	3	3	26.7	26.7	26.7	0	10.289	81179000	8	23.9183	24.0956
360	CCDC132	Q96JG6	Coiled-coil domain-containing protein 132	111.17	1	1	1	1.3	1.3	1.3	0.001042	1.9965	7578200	2	21.9059	18.2462
361	CCDC134	Q9H6E4	Coiled-coil domain-containing protein 134	26.56	6	6	6	32.8	32.8	32.8	0	11.681	122670000	10	23.2399	22.9444
362	CCDC138	Q96M89	Coiled-coil domain-containing protein 138	76.218	2	2	2	4.4	4.4	4.4	0.0078666	1.3328	9594500	1	19.6214	23.0606
363	CCDC22	O60826	Coiled-coil domain-containing protein 22	70.755	5	5	5	9.9	9.9	9.9	0	14.577	91229000	14	24.1509	23.7664
364	CCDC47	Q96A33;J3QR89	Coiled-coil domain-containing protein 47	55.873	8	8	8	26.7	26.7	26.7	0	39.392	197360000	22	24.4976	24.6718
365	CCDC51	Q96ER9	Coiled-coil domain-containing protein 51	45.811	2	2	2	7.5	7.5	7.5	0	5.6825	25382000	6	20.6071	20.7935
366	CCDC66	A2RUB6	Coiled-coil domain-containing protein 66	109.41	1	1	1	0.9	0.9	0.9	0.0042126	1.5306	15987000	1	20.133	18.8199
367	CCDC8	Q9H0W5	Coiled-coil domain-containing protein 8	59.374	4	4	4	13.4	13.4	13.4	0	18.896	86263000	11	25.3856	25.3455
368	CCDC85C	A6NKD9	Coiled-coil domain-containing protein 85C	45.209	1	1	1	2.4	2.4	2.4	0.0093429	1.2791	1734700	0	17.5977	18.7465
369	CCDC88A	Q3V6T2	Girdin	216.04	4	4	4	2.7	2.7	2.7	0	5.5794	12799000	3	22.1861	18.2897
370	CCDC93	Q567U6	Coiled-coil domain-containing protein 93	73.197	5	5	5	7.1	7.1	7.1	0	7.3228	39732000	4	18.8503	22.8214
371	CCNB2	O95067	G2/mitotic-specific cyclin-B2	45.281	2	2	2	6.8	6.8	6.8	0	4.3732	21200000	4	21.4194	21.304
372	CCNDBP1	O95273	Cyclin-D1-binding protein 1	40.262	1	1	1	3.6	3.6	3.6	0.0042373	1.5611	2913900	0	20.4204	19.0429
373	CCNK	O75909	Cyclin-K	64.239	2	2	2	6	6	6	0	12.585	20918000	5	22.3229	22.5435
374	CCNT1	O60563	Cyclin-T1	80.684	6	6	6	12.3	12.3	12.3	0	20.803	98081000	10	23.5798	23.7735
375	CCT2	P78371	T-complex protein 1 subunit beta	57.488	35	35	35	70.1	70.1	70.1	0	323.31	4905400000	156	28.8065	28.7003
376	CCT3	P49368	T-complex protein 1 subunit gamma	60.533	33	33	33	50.3	50.3	50.3	0	323.31	28271000000	224	33.1745	33.2437
377	CCT4	P50991	T-complex protein 1 subunit delta	57.924	32	32	32	71.4	71.4	71.4	0	323.31	13712000000	207	30.0088	29.9373
378	CCT5	P48643	T-complex protein 1 subunit epsilon	59.67	33	33	33	60.6	60.6	60.6	0	323.31	9773800000	215	29.6217	29.6383
379	CCT6A	P40227;Q92526	T-complex protein 1 subunit zeta	58.024	29	29	29	47.1	47.1	47.1	0	323.31	8606500000	231	29.0507	29.1384
380	CCT7	Q99832	T-complex protein 1 subunit eta	59.366	31	31	31	69.1	69.1	69.1	0	314.09	7142600000	221	29.187	29.0895
381	CCT8	P50990	T-complex protein 1 subunit theta	59.62	35	35	35	62.8	62.8	62.8	0	248.9	8214700000	259	29.7583	29.6863
382	CCZ1;CCZ1B	P86791;P86790	Vacuolar fusion protein CCZ1 homolog;Vacuolar fusion protein CCZ1 homolog B	55.866	2	2	2	5	5	5	0	3.4963	15844000	3	19.6536	19.7657
383	CD2BP2	O95400	CD2 antigen cytoplasmic tail-binding protein 2	37.646	8	8	8	34.6	34.6	34.6	0	50.45	192230000	14	23.6371	23.7785
384	CD3EAP	O15446	DNA-directed RNA polymerase I subunit RPA34	54.985	2	2	2	9	9	9	0	9.6506	25837000	5	21.747	21.8755
385	CD81	P60033	CD81 antigen	25.809	1	1	1	6.8	6.8	6.8	0	3.9409	26316000	1	19.4353	20.091
386	CD99	P14209	CD99 antigen	18.848	2	2	2	25.9	25.9	25.9	0	7.6376	21907000	3	22.7811	22.7523
387	CD99L2	Q8TCZ2	CD99 antigen-like protein 2	27.986	1	1	1	7.3	7.3	7.3	0.0078765	1.3384	4725400	1	17.4705	18.7708
388	CDC123	O75794	Cell division cycle protein 123 homolog	39.134	1	1	1	3	3	3	0.0023689	1.7979	29709000	2	20.9165	18.9296
389	CDC16	Q13042	Cell division cycle protein 16 homolog	71.655	2	2	2	5.3	5.3	5.3	0	6.9786	9907400	3	20.5888	20.6367
390	CDC20	Q12834	Cell division cycle protein 20 homolog	54.722	4	4	4	12.6	12.6	12.6	0	9.4012	83134000	9	22.9937	22.9697
391	CDC23	Q9UJX2	Cell division cycle protein 23 homolog	68.833	2	2	2	4.2	4.2	4.2	0.0023729	1.8099	1189900	2	16.0045	19.0553
392	CDC25C	P30307	M-phase inducer phosphatase 3	53.364	2	2	2	4.2	4.2	4.2	0.0013846	1.9802	10600000	3	20.4047	20.4087
393	CDC27	P30260	Cell division cycle protein 27 homolog	91.866	4	4	4	5.7	5.7	5.7	0	6.6603	39901000	5	23.1786	23.3865
394	CDC37	Q16543	Hsp90 co-chaperone Cdc37;Hsp90 co-chaperone Cdc37, N-terminally processed	44.468	15	15	15	37.8	37.8	37.8	0	142.16	1377700000	79	28.069	28.0488
395	CDC42	P60953;P17081;Q9H4E5	Cell division control protein 42 homolog	21.258	4	4	3	31.4	31.4	25.7	0	14.397	54669000	9	23.2189	22.8168
396	CDC42BPA	Q5VT25	Serine/threonine-protein kinase MRCK alpha	197.3	5	4	4	3.2	2.7	2.7	0	4.3297	17352000	3	22.7475	22.4243
397	CDC42BPB	Q9Y5S2	Serine/threonine-protein kinase MRCK beta	194.31	6	6	5	4.4	4.4	3.9	0	13.009	33159000	7	22.8307	23.051
398	CDC45	O75419	Cell division control protein 45 homolog	65.568	4	4	4	8.7	8.7	8.7	0	3.4164	17217000	2	21.1318	20.5447
399	CDC5L	Q99459	Cell division cycle 5-like protein	92.25	22	22	22	27.1	27.1	27.1	0	71.53	631520000	49	26.2224	26.2356
400	CDC6	Q99741	Cell division control protein 6 homolog	62.72	1	1	1	1.8	1.8	1.8	0.0020353	1.8256	9467100	2	18.6811	21.9379
401	CDC7	O00311	Cell division cycle 7-related protein kinase	63.887	2	2	2	5.9	5.9	5.9	0	3.2127	26332000	3	20.4117	19.3801
402	CDC73	Q6P1J9	Parafibromin	60.576	16	16	16	34.7	34.7	34.7	0	84.986	626020000	51	26.1901	26.2521
403	CDIPT	O14735	CDP-diacylglycerol--inositol 3-phosphatidyltransferase	23.539	1	1	1	4.7	4.7	4.7	0.00036617	2.387	33858000	2	18.0759	23.9166
404	CDK1	P06493	Cyclin-dependent kinase 1	34.095	14	14	12	49.8	49.8	43.4	0	46.082	741820000	34	25.3853	25.3936
405	CDK11A;CDK11B	Q9UQ88;P21127	Cyclin-dependent kinase 11A;Cyclin-dependent kinase 11B	91.361	1	1	1	1	1	1	0.003919	1.5691	3920400	2	18.0416	19.0961
406	CDK12	Q9NYV4;Q14004;P11802;Q00534;Q96Q40;O94921;Q00537	Cyclin-dependent kinase 12	164.15	7	6	6	7.7	7.1	7.1	0	20.401	95190000	9	23.8705	23.639
407	CDK2	P24941;Q00526	Cyclin-dependent kinase 2	33.929	12	10	10	49	42.6	42.6	0	16.963	123380000	18	23.8128	23.8884
408	CDK2AP1	O14519	Cyclin-dependent kinase 2-associated protein 1	12.365	1	1	1	11.3	11.3	11.3	0.00036982	2.4563	27090000	4	20.6822	19.4362
409	CDK5	Q00535	Cyclin-dependent-like kinase 5	33.304	10	9	9	38	35.3	35.3	0	23.572	356060000	20	24.426	24.5446
410	CDK5RAP1	Q96SZ6	CDK5 regulatory subunit-associated protein 1	67.688	3	3	3	6	6	6	0	4.392	43915000	1	19.1701	19.8392
411	CDK5RAP2	Q96SN8	CDK5 regulatory subunit-associated protein 2	215.04	2	2	2	1.2	1.2	1.2	0.0051447	1.4924	5969900	0	21.6725	19.6697
412	CDK5RAP3	Q96JB5	CDK5 regulatory subunit-associated protein 3	56.92	2	2	2	4.2	4.2	4.2	0	3.3119	9659300	3	21.369	21.2415
413	CDK9	P50750	Cyclin-dependent kinase 9	42.777	4	3	3	12.6	10.5	10.5	0	37.505	131610000	7	24.4373	24.1881
414	CDKAL1	Q5VV42	Threonylcarbamoyladenosine tRNA methylthiotransferase	65.111	2	2	2	4.8	4.8	4.8	0.00039262	2.9272	16327000	2	20.0785	20.5197
415	CDO1	Q16878	Cysteine dioxygenase type 1	22.972	1	1	1	3.5	3.5	3.5	0.0045337	1.5285	548330000	12	25.9426	18.9509
416	CECR5	Q9BXW7	Cat eye syndrome critical region protein 5	46.321	5	5	5	21	21	21	0	17.171	87791000	8	22.4912	22.5192
417	CELF1	Q92879	CUGBP Elav-like family member 1	52.063	3	3	3	8.2	8.2	8.2	0	5.1465	52656000	4	21.6804	20.0309
418	CENPE	Q02224	Centromere-associated protein E	316.41	3	3	3	1.7	1.7	1.7	0	3.8283	6624400	2	19.5899	18.071
419	CENPJ	Q9HC77	Centromere protein J	153	8	8	8	6.7	6.7	6.7	0	15.358	47752000	8	23.6457	23.4297
420	CENPM	Q9NSP4	Centromere protein M	19.737	4	4	4	23.3	23.3	23.3	0	12.891	59862000	6	22.387	21.9704
421	CENPQ	Q7L2Z9	Centromere protein Q	30.595	1	1	1	6	6	6	0	4.1079	3885100	1	19.2095	21.3683
422	CEP170	Q5SW79;Q96L14	Centrosomal protein of 170 kDa	175.29	11	11	11	9.1	9.1	9.1	0	19.396	114430000	13	24.6069	24.5805
423	CEP170B	Q9Y4F5	Centrosomal protein of 170 kDa protein B	171.69	4	4	4	3.7	3.7	3.7	0	6.0272	34598000	6	22.1474	22.0664
424	CEP350	Q5VT06	Centrosome-associated protein 350	350.93	2	2	2	0.7	0.7	0.7	0.0026801	1.7424	8627500	1	19.0814	22.026
425	CEP55	Q53EZ4	Centrosomal protein of 55 kDa	54.178	5	5	5	13.1	13.1	13.1	0	21.747	106940000	9	24.8529	24.9605
426	CEP78	Q5JTW2	Centrosomal protein of 78 kDa	76.396	2	2	2	3.2	3.2	3.2	0.000387	2.8011	22797000	5	22.5326	22.8804
427	CEP85	Q6P2H3	Centrosomal protein of 85 kDa	85.638	1	1	1	1.6	1.6	1.6	0.0010424	2.0017	5265400	1	20.1192	18.5799
428	CEPT1	Q9Y6K0	Choline/ethanolaminephosphotransferase 1	46.553	2	2	2	6.5	6.5	6.5	0	7.6204	25049000	4	20.7066	20.6
429	CERS2	Q96G23	Ceramide synthase 2	44.876	1	1	1	2.4	2.4	2.4	0.0036042	1.5832	16167000	2	20.9103	18.1385
430	CETN2	P41208;Q12798	Centrin-2	19.738	4	4	4	32.6	32.6	32.6	0	12.231	73048000	7	24.5349	24.6989
431	CFAP20	Q9Y6A4	Cilia- and flagella-associated protein 20	22.774	2	2	2	16.6	16.6	16.6	0.00037051	2.4697	20153000	1	19.3193	19.7194
432	CFL1	P23528	Cofilin-1	18.502	8	8	5	59.6	59.6	41	0	118.77	5510300000	76	28.3008	28.45
433	CFL2	Q9Y281	Cofilin-2	18.736	5	2	2	34.3	15.7	15.7	0	3.3412	13223000	4	21.8044	17.4286
434	CHAF1A	Q13111	Chromatin assembly factor 1 subunit A	106.91	1	1	1	1.2	1.2	1.2	0.00039401	2.9604	9211900	2	22.0663	18.9925
435	CHAF1B	Q13112	Chromatin assembly factor 1 subunit B	61.492	5	5	5	11.6	11.6	11.6	0	11.846	54143000	5	22.9873	23.4275
436	CHAMP1	Q96JM3	Chromosome alignment-maintaining phosphoprotein 1	89.098	1	1	1	1	1	1	0.0045263	1.5198	1945300	0	17.9164	19.9915
437	CHCHD3	Q9NX63	MICOS complex subunit MIC19	26.152	7	7	7	28.6	28.6	28.6	0	24.861	206630000	20	25.4543	25.6645
438	CHCHD4	Q8N4Q1	Mitochondrial intermembrane space import and assembly protein 40	15.996	1	1	1	16.9	16.9	16.9	0.00038775	2.8314	9373400	3	22.5358	18.5541
439	CHD1	O14646;Q8TD26;Q3L8U1	Chromodomain-helicase-DNA-binding protein 1	196.69	14	14	12	10.8	10.8	9.7	0	29.517	241140000	27	26.1928	26.0477
440	CHD1L	Q86WJ1	Chromodomain-helicase-DNA-binding protein 1-like	101	10	10	10	11.3	11.3	11.3	0	17.229	85452000	13	23.8556	24.0628
441	CHD3	Q12873	Chromodomain-helicase-DNA-binding protein 3	226.59	9	2	2	6	2	2	0.0045234	1.5188	7328300	2	21.9973	21.7543
442	CHD4	Q14839;Q8TDI0;A0A2R8Y445	Chromodomain-helicase-DNA-binding protein 4	218	38	38	31	27.2	27.2	23	0	279.73	1165600000	100	26.6637	26.6425
443	CHD7	Q9P2D1	Chromodomain-helicase-DNA-binding protein 7	335.92	3	2	2	1.6	1.3	1.3	0.0013699	1.8925	8641300	2	18.1143	21.9441
444	CHD8	Q9HCK8	Chromodomain-helicase-DNA-binding protein 8	290.52	7	6	6	3.7	3.3	3.3	0	9.9786	51188000	7	22.622	22.4609
445	CHEK1	O14757	Serine/threonine-protein kinase Chk1	54.433	3	3	3	7.6	7.6	7.6	0	9.2955	30898000	5	21.3687	21.346
446	CHEK2	O96017	Serine/threonine-protein kinase Chk2	60.914	2	2	2	4.4	4.4	4.4	0	5.6125	18575000	4	21.7581	21.8774
447	CHERP	Q8IWX8	Calcium homeostasis endoplasmic reticulum protein	103.7	12	12	12	17.8	17.8	17.8	0	64.012	641180000	46	25.9229	25.8605
448	CHM	P24386	Rab proteins geranylgeranyltransferase component A 1	73.475	2	2	2	3.5	3.5	3.5	0.00037538	2.5742	4172700	0	20.9954	17.9898
449	CHML	P26374	Rab proteins geranylgeranyltransferase component A 2	74.071	3	3	3	7.2	7.2	7.2	0	5.5566	24041000	3	23.2737	23.5934
450	CHORDC1	Q9UHD1	Cysteine and histidine-rich domain-containing protein 1	37.489	2	2	2	6.9	6.9	6.9	0	4.6726	38050000	4	23.9953	18.8931
451	CHTF18	Q8WVB6	Chromosome transmission fidelity protein 18 homolog	107.38	9	8	8	12.1	11.4	11.4	0	15.091	89345000	12	23.0951	22.682
452	CHTOP	Q9Y3Y2	Chromatin target of PRMT1 protein	26.396	5	5	5	26.2	26.2	26.2	0	21.306	138670000	9	24.2668	23.5377
453	CHUK	O15111	Inhibitor of nuclear factor kappa-B kinase subunit alpha	84.639	3	3	3	4.8	4.8	4.8	0	6.0025	17969000	3	20.783	21.0153
454	CHURC1	Q8WUH1	Protein Churchill	16.111	1	1	1	9.4	9.4	9.4	0.0042331	1.5585	3003400	0	18.1714	20.4055
455	CIAO1	O76071	Probable cytosolic iron-sulfur protein assembly protein CIAO1	37.84	1	1	1	2.9	2.9	2.9	0.0010497	2.0487	21413000	2	19.3083	18.9032
456	CIC	Q96RK0	Protein capicua homolog	163.82	11	11	11	13.1	13.1	13.1	0	50.59	232240000	16	24.4178	24.257
457	CISD1	Q9NZ45	CDGSH iron-sulfur domain-containing protein 1	12.199	3	3	3	34.3	34.3	34.3	0	7.5837	93140000	8	22.6552	22.5046
458	CISD2	Q8N5K1	CDGSH iron-sulfur domain-containing protein 2	15.278	1	1	1	5.2	5.2	5.2	0.0096184	1.2583	28399000	5	22.2808	19.5147
459	CIT	O14578	Citron Rho-interacting kinase	231.43	51	51	51	27.2	27.2	27.2	0	286.55	1578600000	124	27.8699	27.5412
460	CIZ1	Q9ULV3	Cip1-interacting zinc finger protein	100.04	1	1	1	1.8	1.8	1.8	0.00036955	2.4506	5972900	2	19.6651	18.2787
461	CKAP2	Q8WWK9	Cytoskeleton-associated protein 2	76.986	4	4	4	8.5	8.5	8.5	0	15.082	115930000	10	25.0259	25.0706
462	CKAP4	Q07065	Cytoskeleton-associated protein 4	66.022	13	13	13	27.6	27.6	27.6	0	43.423	238750000	24	25.8446	26.2533
463	CKAP5	Q14008	Cytoskeleton-associated protein 5	225.49	18	18	18	11.8	11.8	11.8	0	36.829	207270000	27	24.6858	24.8075
464	CKB	P12277	Creatine kinase B-type	42.644	7	7	7	23.6	23.6	23.6	0	27.728	286910000	19	23.4387	23.4935
465	CLASP1	Q7Z460	CLIP-associating protein 1	169.45	3	2	2	2.5	1.8	1.8	0	3.7853	9375600	2	19.6144	19.6176
466	CLASP2	O75122	CLIP-associating protein 2	141.06	9	9	8	8.4	8.4	7.6	0	33.206	100520000	19	24.4303	24.3967
467	CLCC1	Q96S66	Chloride channel CLIC-like protein 1	62.022	37	37	37	63.9	63.9	63.9	0	323.31	7027700000	212	29.7312	29.607
468	CLIC1	O00299	Chloride intracellular channel protein 1	26.922	9	9	9	40.2	40.2	40.2	0	59.848	417360000	19	24.228	24.2021
469	CLIC4	Q9Y696;O15247;Q9NZA1;Q96NY7	Chloride intracellular channel protein 4	28.772	7	7	7	38.7	38.7	38.7	0	21.665	98045000	8	22.2832	22.3024
470	CLINT1	Q14677	Clathrin interactor 1	68.259	11	11	11	25	25	25	0	45.096	286980000	22	26.6237	26.2358
471	CLN6	Q9NWW5	Ceroid-lipofuscinosis neuronal protein 6	35.919	1	1	1	4.2	4.2	4.2	0.0003775	2.6114	25662000	4	20.8033	20.5649
472	CLNS1A	P54105	Methylosome subunit pICln	26.215	4	4	4	34.2	34.2	34.2	0	12.312	94892000	11	22.5768	22.9754
473	CLPP	Q16740	ATP-dependent Clp protease proteolytic subunit, mitochondrial	30.18	13	13	13	43.7	43.7	43.7	0	129.03	4913600000	137	28.1416	28.1232
474	CLPTM1	O96005	Cleft lip and palate transmembrane protein 1	76.096	2	2	2	3.9	3.9	3.9	0	4.7971	27707000	2	20.4983	21.618
475	CLPTM1L	Q96KA5	Cleft lip and palate transmembrane protein 1-like protein	62.228	3	3	3	8	8	8	0	10.808	66757000	6	22.6497	22.6293
476	CLPX	O76031	ATP-dependent Clp protease ATP-binding subunit clpX-like, mitochondrial	69.223	30	30	30	45.7	45.7	45.7	0	272.32	5022600000	174	28.841	28.7945
477	CLTA	P09496	Clathrin light chain A	27.076	2	2	2	6.9	6.9	6.9	0	3.686	13712000	1	22.2776	20.0286
478	CLTB	P09497	Clathrin light chain B	25.19	2	2	2	9.2	9.2	9.2	0.00036284	2.3169	15212000	2	22.2395	22.4781
479	CLTC	Q00610;P53675	Clathrin heavy chain 1	191.61	71	71	71	48.8	48.8	48.8	0	323.31	7902400000	257	28.9965	29.0343
480	CLUH	O75153;Q9Y5I4	Clustered mitochondria protein homolog	146.67	14	14	14	12.8	12.8	12.8	0	30.464	300070000	20	24.536	24.5422
481	CMAS	Q8NFW8	N-acylneuraminate cytidylyltransferase	48.379	3	3	3	11.5	11.5	11.5	0	6.9548	40978000	4	22.074	21.9116
482	CMPK1	P30085	UMP-CMP kinase	22.222	1	1	1	8.7	8.7	8.7	0.00040355	3.11	6197000	2	17.7249	18.3957
483	CMSS1	Q9BQ75	Protein CMSS1	31.884	3	3	3	11.5	11.5	11.5	0	5.6579	52355000	4	21.6885	21.4397
484	CMTM6	Q9NX76	CKLF-like MARVEL transmembrane domain-containing protein 6	20.419	1	1	1	5.5	5.5	5.5	0.00071788	2.2382	15888000	4	19.4709	22.6303
485	CMTR1	Q8N1G2	Cap-specific mRNA (nucleoside-2-O-)-methyltransferase 1	95.32	2	2	2	3.2	3.2	3.2	0.0042345	1.5608	5686600	1	17.9509	19.0186
486	CNDP2	Q96KP4	Cytosolic non-specific dipeptidase	52.878	9	9	9	26.5	26.5	26.5	0	22.668	410460000	29	24.8399	24.8151
487	CNNM3	Q8NE01	Metal transporter CNNM3	76.118	3	3	3	5	5	5	0	3.2211	41765000	3	22.6634	22.4156
488	CNOT1	A5YKK6	CCR4-NOT transcription complex subunit 1	266.94	13	13	13	7.2	7.2	7.2	0	35.814	144950000	21	24.3171	24.2659
489	CNOT10	Q9H9A5	CCR4-NOT transcription complex subunit 10	82.309	2	2	2	5.2	5.2	5.2	0	15.171	60810000	3	24.5347	23.8238
490	CNOT11	Q9UKZ1	CCR4-NOT transcription complex subunit 11	55.215	4	4	4	14.9	14.9	14.9	0	29.873	74111000	8	22.9677	22.8113
491	CNOT2	Q9NZN8	CCR4-NOT transcription complex subunit 2	59.737	2	2	2	7	7	7	0.0036125	1.5947	156870000	2	23.4476	23.138
492	CNOT7	Q9UIV1	CCR4-NOT transcription complex subunit 7	32.745	1	1	1	4.9	4.9	4.9	0.003603	1.58	4055500	0	18.8398	20.1237
493	CNP	P09543	2,3-cyclic-nucleotide 3-phosphodiesterase	47.578	11	11	11	22.1	22.1	22.1	0	31.709	208270000	15	23.9535	23.9647
494	COA3	Q9Y2R0	Cytochrome c oxidase assembly factor 3 homolog, mitochondrial	11.731	3	3	3	30.2	30.2	30.2	0	9.1028	129120000	9	24.3041	24.7489
495	COBL	O75128	Protein cordon-bleu	135.62	10	10	10	11.4	11.4	11.4	0	21.721	95146000	14	24.1444	24.1134
496	COG1	Q8WTW3	Conserved oligomeric Golgi complex subunit 1	108.98	1	1	1	1.1	1.1	1.1	0.00036417	2.3456	7452000	1	19.764	19.8122
497	COIL	P38432	Coilin	62.608	1	1	1	2.8	2.8	2.8	0	7.5505	25632000	1	19.6264	17.9457
498	COMMD1	Q8N668	COMM domain-containing protein 1	21.178	2	2	2	7.9	7.9	7.9	0.00037216	2.5072	10608000	1	20.2681	18.3312
499	COMMD2	Q86X83	COMM domain-containing protein 2	22.745	1	1	1	5.5	5.5	5.5	0.00037736	2.6069	6721000	2	18.8861	18.9811
500	COMMD3-BMI1;COMMD3;BMI1	R4GMX3;Q9UBI1;P35226	COMM domain-containing protein 3;Polycomb complex protein BMI-1	53.293	4	4	4	13.6	13.6	13.6	0	5.1517	25886000	3	20.6599	21.2108
501	COMMD4	Q9H0A8	COMM domain-containing protein 4	21.764	1	1	1	10.6	10.6	10.6	0	6.125	34052000	2	20.2226	18.4291
502	COMMD8	Q9NX08	COMM domain-containing protein 8	21.09	2	2	2	25.1	25.1	25.1	0.0013643	1.8689	47644000	2	21.3882	21.3679
503	COMTD1	Q86VU5	Catechol O-methyltransferase domain-containing protein 1	28.808	1	1	1	9.9	9.9	9.9	0	18.807	10793000	1	19.5119	20.4412
504	COPA	P53621	Coatomer subunit alpha;Xenin;Proxenin	138.34	40	40	40	43.4	43.4	43.4	0	220.54	3661200000	141	27.9818	27.8683
505	COPB1	P53618	Coatomer subunit beta	107.14	24	24	24	34.3	34.3	34.3	0	104.86	1890300000	76	26.8076	26.9558
506	COPB2	P35606	Coatomer subunit beta	102.49	28	28	28	40.1	40.1	40.1	0	135.31	924010000	61	26.4985	26.5176
507	COPE	O14579	Coatomer subunit epsilon	34.482	11	11	11	50	50	50	0	73.172	210500000	21	24.5241	24.6992
508	COPG1	Q9Y678	Coatomer subunit gamma-1	97.717	20	20	19	35.8	35.8	34.4	0	271.23	1395500000	58	26.0568	26.237
509	COPG2	Q9UBF2	Coatomer subunit gamma-2	97.621	15	14	14	26.8	25.4	25.4	0	105.89	318490000	27	24.3852	24.3847
510	COPS2	P61201	COP9 signalosome complex subunit 2	51.596	10	10	10	28	28	28	0	21.69	236030000	15	23.4835	23.7289
511	COPS3	Q9UNS2	COP9 signalosome complex subunit 3	47.873	4	4	4	12.3	12.3	12.3	0	60.865	72916000	11	23.9006	23.8436
512	COPS4	Q9BT78	COP9 signalosome complex subunit 4	46.268	4	4	4	11.8	11.8	11.8	0	8.8201	39763000	7	22.792	23.05
513	COPS7A	Q9UBW8	COP9 signalosome complex subunit 7a	30.276	1	1	1	5.8	5.8	5.8	0	11.82	26312000	2	20.0324	19.2363
514	COPS7B	Q9H9Q2	COP9 signalosome complex subunit 7b	29.622	3	3	3	18.9	18.9	18.9	0	11.477	60040000	8	23.6832	23.9652
515	COPZ1	P61923	Coatomer subunit zeta-1	20.198	3	3	3	26.6	26.6	26.6	0	11.522	288800000	11	23.2534	23.4273
516	CORO1A	P31146	Coronin-1A	51.026	2	2	2	7.8	7.8	7.8	0	9.2128	33740000	5	23.266	19.3063
517	CORO1B	Q9BR76	Coronin-1B	54.234	6	6	6	22.5	22.5	22.5	0	30.386	159870000	17	22.8372	22.956
518	CORO1C	Q9ULV4	Coronin-1C	53.248	5	5	5	16.2	16.2	16.2	0	14.045	96197000	9	22.3446	22.3213
519	CORO7	P57737	Coronin-7	100.6	1	1	1	1.4	1.4	1.4	0.00036536	2.3631	23377000	4	22.6134	19.2036
520	COTL1	Q14019	Coactosin-like protein	15.945	4	4	4	26.1	26.1	26.1	0	12.358	80439000	13	23.4789	23.8803
521	COX15	Q7KZN9	Cytochrome c oxidase assembly protein COX15 homolog	46.03	1	1	1	4.4	4.4	4.4	0.0010608	2.1108	9789900	1	19.2811	20.3359
522	COX4I1	P13073	Cytochrome c oxidase subunit 4 isoform 1, mitochondrial	19.576	7	7	7	38.5	38.5	38.5	0	17.207	344270000	22	24.9462	25.3703
523	COX5A	P20674	Cytochrome c oxidase subunit 5A, mitochondrial	16.762	4	4	4	38	38	38	0	13.51	239030000	12	23.9535	23.9674
524	COX5B	P10606	Cytochrome c oxidase subunit 5B, mitochondrial	13.696	5	5	5	26.4	26.4	26.4	0	6.5409	107490000	9	23.6861	23.9305
525	COX6B1	P14854	Cytochrome c oxidase subunit 6B1	10.192	1	1	1	12.8	12.8	12.8	0.0003811	2.6847	13998000	1	17.9689	19.7395
526	COX6C	P09669	Cytochrome c oxidase subunit 6C	8.7813	2	2	2	25.3	25.3	25.3	0.00071633	2.2217	27207000	1	19.9673	19.4218
527	COX7A2	P14406	Cytochrome c oxidase subunit 7A2, mitochondrial	9.3959	2	2	2	27.7	27.7	27.7	0	5.2952	107920000	6	22.1252	22.1547
528	COX7C	P15954	Cytochrome c oxidase subunit 7C, mitochondrial	7.2454	1	1	1	14.3	14.3	14.3	0.0042222	1.5415	35398000	3	21.4359	18.1775
529	CPNE1	Q99829	Copine-1	59.058	10	10	10	28.1	28.1	28.1	0	54.6	286500000	26	24.5215	24.6517
530	CPNE3	O75131;Q96FN4;Q8IYJ1;Q96A23;O95741;Q86YQ8;Q9HCH3;Q9UBL6	Copine-3	60.13	13	13	13	25	25	25	0	30.088	1004400000	44	26.4322	26.429
531	CPSF1	Q10570	Cleavage and polyadenylation specificity factor subunit 1	160.88	17	17	17	16.1	16.1	16.1	0	77.967	214170000	23	24.9304	24.742
532	CPSF2	Q9P2I0	Cleavage and polyadenylation specificity factor subunit 2	88.486	10	10	10	21.9	21.9	21.9	0	29.834	96922000	11	22.8561	22.6206
533	CPSF3	Q9UKF6	Cleavage and polyadenylation specificity factor subunit 3	77.485	11	11	11	25.4	25.4	25.4	0	47.09	327180000	15	24.6131	24.7424
534	CPSF7	Q8N684	Cleavage and polyadenylation specificity factor subunit 7	52.049	1	1	1	2.3	2.3	2.3	0.00036179	2.3044	3065200	2	19.6121	19.5819
535	CRABP2	P29373	Cellular retinoic acid-binding protein 2	15.693	2	2	2	15.9	15.9	15.9	0	6.532	27594000	6	22.5599	22.3988
536	CREBBP	Q92793	CREB-binding protein	265.35	5	5	3	4.1	4.1	2.4	0	16.802	46507000	10	23.2241	23.1853
537	CRLF3	Q8IUI8	Cytokine receptor-like factor 3	49.765	3	3	3	9.3	9.3	9.3	0	6.126	25297000	3	20.6786	20.8949
538	CRNKL1	Q9BZJ0	Crooked neck-like protein 1	100.45	7	7	7	8.8	8.8	8.8	0	11.892	83168000	9	24.6217	24.6944
539	CSDE1	O75534	Cold shock domain-containing protein E1	88.884	23	23	23	28.9	28.9	28.9	0	79.779	1120400000	76	27.3324	27.2659
540	CSE1L	P55060	Exportin-2	110.42	34	34	34	42.2	42.2	42.2	0	323.31	3047000000	121	28.2625	28.3687
541	CSK	P41240;P42679	Tyrosine-protein kinase CSK	50.704	7	7	7	21.6	21.6	21.6	0	26.294	232550000	18	25.3927	25.7595
542	CSNK1A1L;CSNK1A1	Q8N752;P48729	Casein kinase I isoform alpha-like;Casein kinase I isoform alpha	39.085	1	1	1	3	3	3	0.00072046	2.2665	14857000	2	19.6357	19.6587
543	CSNK2A1;CSNK2A3	P68400;Q8NEV1	Casein kinase II subunit alpha;Casein kinase II subunit alpha 3	45.143	14	14	14	52.2	52.2	52.2	0	159.91	1386300000	40	25.863	25.7337
544	CSNK2A2	P19784	Casein kinase II subunit alpha	41.213	14	14	14	37.4	37.4	37.4	0	53.734	634410000	31	25.2585	25.1477
545	CSNK2B	P67870	Casein kinase II subunit beta	24.942	9	9	9	69.3	69.3	69.3	0	87.337	506150000	22	24.9548	24.9404
546	CSRP2	Q16527	Cysteine and glycine-rich protein 2	20.954	5	5	5	35.2	35.2	35.2	0	34.602	363030000	15	25.6244	25.5751
547	CSTF1	Q05048	Cleavage stimulation factor subunit 1	48.357	7	7	7	23.2	23.2	23.2	0	49.031	205130000	15	23.2947	23.2221
548	CSTF2	P33240	Cleavage stimulation factor subunit 2	60.959	4	4	2	11.3	11.3	5.7	0	14.763	38619000	7	21.9346	21.9571
549	CSTF2T	Q9H0L4	Cleavage stimulation factor subunit 2 tau variant	64.436	4	2	2	11.7	6.5	6.5	0.00040453	3.121	4485400	2	21.3635	17.1555
550	CTBP1	Q13363	C-terminal-binding protein 1	47.535	8	8	5	22.7	22.7	17.3	0	39.184	210590000	13	23.8569	23.8031
551	CTBP2	P56545	C-terminal-binding protein 2	48.944	6	3	3	17.5	12.1	12.1	0	11.794	72273000	5	21.7488	22.2308
552	CTCF	P49711	Transcriptional repressor CTCF	82.785	1	1	1	2.5	2.5	2.5	0	18.404	6489200	1	19.4112	18.0018
553	CTDP1	Q9Y5B0	RNA polymerase II subunit A C-terminal domain phosphatase	104.4	1	1	1	1.6	1.6	1.6	0.00072202	2.2918	4649400	1	19.3491	20.2985
554	CTIF	O43310	CBP80/20-dependent translation initiation factor	67.586	1	1	1	2.7	2.7	2.7	0.000373	2.5249	4710700	2	19.4889	17.7577
555	CTNNA1	P35221	Catenin alpha-1	100.07	4	4	4	7.8	7.8	7.8	0	9.5103	28825000	4	21.4261	21.5971
556	CTNNB1	P35222	Catenin beta-1	85.496	2	1	1	2.6	1.5	1.5	0.00036127	2.2967	3149100	1	20.8786	19.0696
557	CTNNBL1	Q8WYA6	Beta-catenin-like protein 1	65.173	12	12	12	28.6	28.6	28.6	0	32.081	285790000	24	25.1306	25.0893
558	CTNND1	O60716	Catenin delta-1	108.17	20	20	20	28.9	28.9	28.9	0	84.102	865880000	57	26.0158	25.9697
559	CTPS1	P17812	CTP synthase 1	66.69	19	19	18	40.8	40.8	38.4	0	244.84	2162800000	75	27.1419	27.3248
560	CTPS2	Q9NRF8	CTP synthase 2	65.677	3	2	2	6.1	3.8	3.8	0.00038037	2.6709	12041000	3	20.3966	20.5393
561	CTR9	Q6PD62	RNA polymerase-associated protein CTR9 homolog	133.5	3	3	3	3.8	3.8	3.8	0	6.0619	97783000	5	21.4447	21.6705
562	CTU2	Q2VPK5	Cytoplasmic tRNA 2-thiolation protein 2	56.107	4	4	4	11.7	11.7	11.7	0	5.8343	63349000	5	21.5387	21.9028
563	CUL1	Q13616	Cullin-1	89.677	15	15	15	27.8	27.8	27.8	0	42.933	432140000	29	25.5306	25.3063
564	CUL2	Q13617	Cullin-2	86.982	4	4	4	8.5	8.5	8.5	0	11.38	104720000	10	23.8971	24.0619
565	CUL3	Q13618	Cullin-3	88.929	4	4	4	6	6	6	0	12.536	101690000	10	24.2051	24.4403
566	CUL4B	Q13620;Q13619	Cullin-4B	103.98	13	13	13	20.3	20.3	20.3	0	44.207	184040000	15	24.938	25.366
567	CUL5	Q93034	Cullin-5	90.954	10	10	10	14	14	14	0	13.626	110890000	6	22.5388	22.4762
568	CUX1	P39880	Homeobox protein cut-like 1	164.19	2	2	2	2	2	2	0	5.9004	14249000	4	22.5894	22.474
569	CWC22	Q9HCG8	Pre-mRNA-splicing factor CWC22 homolog	105.47	2	2	2	3.1	3.1	3.1	0	3.8171	17043000	4	21.9893	21.8819
570	CWF19L1	Q69YN2	CWF19-like protein 1	60.618	3	3	3	6.1	6.1	6.1	0.0010563	2.0908	29529000	1	21.3426	19.0332
571	CXorf56	Q9H5V9	UPF0428 protein CXorf56	25.624	4	4	4	19.8	19.8	19.8	0	8.2385	22881000	4	21.2759	19.8631
572	CXorf57	Q6NSI4	Uncharacterized protein CXorf57	97.553	3	3	3	6.1	6.1	6.1	0	6.5667	31644000	4	20.4048	19.893
573	CXXC1	Q9P0U4	CXXC-type zinc finger protein 1	75.711	3	3	3	7.2	7.2	7.2	0.00039761	3.0336	18469000	4	22.4052	21.6702
574	CYB5A	P00167	Cytochrome b5	15.33	2	2	2	25.4	25.4	25.4	0	4.6319	77847000	7	23.4413	23.8219
575	CYB5R1	Q9UHQ9	NADH-cytochrome b5 reductase 1	34.094	4	4	4	18	18	18	0	5.8226	32847000	5	20.8849	20.9311
576	CYB5R3	P00387	NADH-cytochrome b5 reductase 3;NADH-cytochrome b5 reductase 3 membrane-bound form;NADH-cytochrome b5 reductase 3 soluble form	34.234	10	10	10	42.2	42.2	42.2	0	42.624	402440000	29	24.3654	24.215
577	CYC1	P08574	Cytochrome c1, heme protein, mitochondrial	35.422	5	5	5	30.5	30.5	30.5	0	26.842	246420000	12	23.6222	23.7005
578	CYFIP1	Q7L576	Cytoplasmic FMR1-interacting protein 1	145.18	11	11	7	10.3	10.3	6.7	0	24.175	215700000	23	24.3319	24.672
579	CYFIP2	Q96F07	Cytoplasmic FMR1-interacting protein 2	148.4	7	3	3	6.7	3.2	3.2	0	6.8935	66830000	6	24.9647	24.3656
580	CYLD	Q9NQC7	Ubiquitin carboxyl-terminal hydrolase CYLD	107.31	3	3	3	3	3	3	0.00039339	2.9504	10389000	2	21.6159	21.2909
581	CYP51A1	Q16850	Lanosterol 14-alpha demethylase	56.805	6	6	6	17.1	17.1	17.1	0	17.232	92016000	12	23.1499	23.3452
582	DACH1	Q9UI36	Dachshund homolog 1	78.561	1	1	1	1.8	1.8	1.8	0.00037439	2.5618	7949100	2	20.1386	19.4449
583	DAD1	P61803	Dolichyl-diphosphooligosaccharide--protein glycosyltransferase subunit DAD1	12.497	3	3	3	28.3	28.3	28.3	0	7.2757	60401000	7	22.3563	22.5963
584	DAK	Q3LXA3	Bifunctional ATP-dependent dihydroxyacetone kinase/FAD-AMP lyase (cyclizing);ATP-dependent dihydroxyacetone kinase;FAD-AMP lyase (cyclizing)	58.946	1	1	1	3.8	3.8	3.8	0.0072601	1.3582	13025000	4	22.2077	19.0387
585	DAP3	P51398	28S ribosomal protein S29, mitochondrial	45.566	9	9	9	35.7	35.7	35.7	0	22.248	150230000	12	23.3266	23.2984
586	DAPK3	O43293	Death-associated protein kinase 3	52.535	1	1	1	2.9	2.9	2.9	0.00071098	2.1637	4146600	1	19.2148	19.2982
587	DARS	P14868	Aspartate--tRNA ligase, cytoplasmic	57.136	3	3	3	8.2	8.2	8.2	0	12.157	15412000	3	21.9131	21.0061
588	DARS2	Q6PI48	Aspartate--tRNA ligase, mitochondrial	73.562	2	2	2	3.3	3.3	3.3	0	3.514	19575000	2	19.5615	18.2582
589	DAZAP1	Q96EP5	DAZ-associated protein 1	43.383	5	5	5	20.6	20.6	20.6	0	48.886	270550000	19	25.07	24.6838
590	DBN1	Q16643	Drebrin	71.428	6	6	6	14.8	14.8	14.8	0	49.958	110710000	14	23.7266	24.4035
591	DBNL	Q9UJU6	Drebrin-like protein	48.207	6	6	6	20.2	20.2	20.2	0	63.417	128770000	12	23.4696	23.6933
592	DBT	P11182	Lipoamide acyltransferase component of branched-chain alpha-keto acid dehydrogenase complex, mitochondrial	53.486	6	6	6	14.9	14.9	14.9	0	10.86	197090000	11	23.5633	23.7886
593	DCAF12	Q5T6F0	DDB1- and CUL4-associated factor 12	50.517	1	1	1	2.2	2.2	2.2	0.00038124	2.6873	3317700	1	17.9075	19.0234
594	DCAF7	P61962	DDB1- and CUL4-associated factor 7	38.926	3	3	3	9.9	9.9	9.9	0	6.8948	58751000	7	21.9083	20.6667
595	DCAKD	Q8WVC6	Dephospho-CoA kinase domain-containing protein	26.55	2	2	2	10.4	10.4	10.4	0	4.1852	8143900	2	18.7774	19.6725
596	DCD	P81605	Dermcidin;Survival-promoting peptide;DCD-1	11.284	2	2	2	12.7	12.7	12.7	0.00036941	2.4495	9547000	1	21.6339	18.2407
597	DCP1A	Q9NPI6	mRNA-decapping enzyme 1A	63.278	3	3	3	7.9	7.9	7.9	0	8.2878	52553000	6	22.7036	22.3171
598	DCTN1	Q14203;E7EWF7	Dynactin subunit 1	141.69	22	22	22	20.7	20.7	20.7	0	88.447	500070000	48	26.6199	26.6557
599	DCTN2	Q13561	Dynactin subunit 2	44.23	9	9	9	33.9	33.9	33.9	0	42.119	186730000	21	24.0907	24.3096
600	DCTN3	O75935	Dynactin subunit 3	21.119	1	1	1	4.3	4.3	4.3	0.00037202	2.5067	23304000	2	21.7088	19.7574
601	DCTN4	Q9UJW0	Dynactin subunit 4	52.337	6	6	6	19.8	19.8	19.8	0	21.532	112500000	14	23.4164	23.3797
602	DCTN5	Q9BTE1	Dynactin subunit 5	20.126	1	1	1	5.5	5.5	5.5	0	3.6244	16582000	2	19.0858	19.4899
603	DCUN1D5	Q9BTE7;Q92564	DCN1-like protein 5	27.508	4	4	4	18.6	18.6	18.6	0	10.8	83165000	6	22.5107	22.6897
604	DCXR	Q7Z4W1	L-xylulose reductase	25.913	1	1	1	3.3	3.3	3.3	0.00036576	2.3841	10660000	1	18.343	17.8859
605	DDB1	Q16531	DNA damage-binding protein 1	126.97	18	18	18	18.1	18.1	18.1	0	31.35	333690000	27	25.1622	25.237
606	DDHD2	O94830	Phospholipase DDHD2	81.031	2	2	2	2.3	2.3	2.3	0.00039293	2.9379	7311000	3	18.9685	18.7806
607	DDI2	Q5TDH0	Protein DDI1 homolog 2	44.522	6	6	6	19.8	19.8	19.8	0	22.956	141760000	14	24.1026	24.1399
608	DDOST	P39656	Dolichyl-diphosphooligosaccharide--protein glycosyltransferase 48 kDa subunit	50.8	10	10	10	34.2	34.2	34.2	0	43.628	509680000	24	24.2022	24.6801
609	DDRGK1	Q96HY6	DDRGK domain-containing protein 1	35.61	4	4	4	26.4	26.4	26.4	0	19.701	54117000	7	23.0237	23.5242
610	DDX1	Q92499	ATP-dependent RNA helicase DDX1	82.431	31	31	31	47.4	47.4	47.4	0	295.02	2883800000	112	27.7907	27.6663
611	DDX10	Q13206	Probable ATP-dependent RNA helicase DDX10	100.89	2	2	2	3.5	3.5	3.5	0.0029723	1.6292	11063000	2	21.0825	18.6142
612	DDX11L8;DDX11	A8MPP1;Q96FC9	Putative ATP-dependent RNA helicase DDX11-like protein 8;Probable ATP-dependent RNA helicase DDX11	101.81	1	1	1	1.7	1.7	1.7	0.00040032	3.0629	10303000	1	22.3199	18.8802
613	DDX17	Q92841	Probable ATP-dependent RNA helicase DDX17	80.272	31	25	25	43.9	36.6	36.6	0	227.81	7444400000	175	28.911	28.6961
614	DDX18	Q9NVP1	ATP-dependent RNA helicase DDX18	75.406	3	3	3	6.1	6.1	6.1	0	5.1943	43182000	4	22.4649	22.7943
615	DDX19A	Q9NUU7;Q9UHL0	ATP-dependent RNA helicase DDX19A	53.974	18	18	3	42.7	42.7	8.2	0	144.02	1042200000	64	27.3756	27.3944
616	DDX19B	Q9UMR2	ATP-dependent RNA helicase DDX19B	53.926	16	1	1	40.3	5.8	5.8	0	62.212	52725000	3	20.8735	18.4568
617	DDX20	Q9UHI6	Probable ATP-dependent RNA helicase DDX20	92.239	11	11	11	20.1	20.1	20.1	0	100.47	553130000	32	25.7174	25.5812
618	DDX21	Q9NR30	Nucleolar RNA helicase 2	87.343	36	36	34	46	46	42.5	0	243.52	3693300000	120	29.0351	28.9335
619	DDX23	Q9BUQ8	Probable ATP-dependent RNA helicase DDX23	95.581	15	15	15	21.8	21.8	21.8	0	38.175	479940000	43	25.8785	25.5751
620	DDX24	Q9GZR7	ATP-dependent RNA helicase DDX24	96.331	2	2	2	4.2	4.2	4.2	0.00040486	3.126	15099000	2	22.9229	22.4777
621	DDX26B;INTS6	Q5JSJ4;Q9UL03	Protein DDX26B;Integrator complex subunit 6	96.672	1	1	1	0.8	0.8	0.8	0.0017042	1.8623	7791700	2	18.8735	18.2026
622	DDX27	Q96GQ7	Probable ATP-dependent RNA helicase DDX27	89.834	2	2	2	2	2	2	0.0010435	2.0068	16877000	4	17.8011	21.8783
623	DDX28	Q9NUL7	Probable ATP-dependent RNA helicase DDX28	59.58	2	2	2	4.4	4.4	4.4	0	5.4124	20811000	3	21.6575	22.1195
624	DDX39A	O00148	ATP-dependent RNA helicase DDX39A	49.129	17	7	7	41.9	22.5	22.5	0	27.027	327880000	18	24.3629	24.4439
625	DDX39B	Q13838	Spliceosome RNA helicase DDX39B	48.991	17	17	7	46.5	46.5	29.9	0	109.3	1477700000	63	26.474	26.3162
626	DDX3X;DDX3Y	O00571;O15523;Q9NQI0	ATP-dependent RNA helicase DDX3X;ATP-dependent RNA helicase DDX3Y	73.243	36	36	35	58.8	58.8	57.1	0	323.31	6393600000	215	28.8865	28.8226
627	DDX41	Q9UJV9	Probable ATP-dependent RNA helicase DDX41	69.837	10	10	10	20.7	20.7	20.7	0	13.783	124650000	13	24.0184	24.028
628	DDX46	Q7L014	Probable ATP-dependent RNA helicase DDX46	117.36	16	16	16	14.8	14.8	14.8	0	39.204	296910000	30	25.6576	25.7642
629	DDX47	Q9H0S4	Probable ATP-dependent RNA helicase DDX47	50.646	5	5	5	17.8	17.8	17.8	0	29.068	173920000	18	25.2976	25.5372
630	DDX49	Q9Y6V7	Probable ATP-dependent RNA helicase DDX49	54.226	4	4	4	15.3	15.3	15.3	0	6.2018	60676000	3	22.3304	18.6961
631	DDX5	P17844	Probable ATP-dependent RNA helicase DDX5	69.147	35	34	29	48.5	46.7	39.9	0	252.29	9837700000	206	30.1272	29.9553
632	DDX50	Q9BQ39	ATP-dependent RNA helicase DDX50	82.564	9	7	7	17.9	14.2	14.2	0	26.549	96172000	13	24.1807	24.2393
633	DDX51	Q8N8A6	ATP-dependent RNA helicase DDX51	72.456	2	2	2	4.8	4.8	4.8	0	7.878	7414400	3	20.5977	21.5613
634	DDX52	Q9Y2R4	Probable ATP-dependent RNA helicase DDX52	67.497	4	4	4	10	10	10	0	11.638	75422000	9	23.5094	23.2059
635	DDX54	Q8TDD1	ATP-dependent RNA helicase DDX54	98.594	5	5	5	9.5	9.5	9.5	0	33.83	10290000000	10	30.6734	30.3264
636	DDX56	Q9NY93	Probable ATP-dependent RNA helicase DDX56	61.589	2	2	2	6	6	6	0	9.4216	32101000	4	23.3003	22.7332
637	DDX6	P26196	Probable ATP-dependent RNA helicase DDX6	54.416	13	13	13	49.3	49.3	49.3	0	109.39	953520000	31	25.4963	25.3433
638	DEK	P35659	Protein DEK	42.674	12	12	12	32.8	32.8	32.8	0	36.783	418390000	37	24.9828	24.9187
639	DENND4A	Q7Z401	C-myc promoter-binding protein	209.24	1	1	1	0.7	0.7	0.7	0.00038183	2.6977	13662000	3	21.9272	19.038
640	DENND4C	Q5VZ89	DENN domain-containing protein 4C	212.71	5	5	5	3.5	3.5	3.5	0	3.9202	318250000	4	23.3438	23.2775
641	DENR	O43583	Density-regulated protein	22.092	1	1	1	10.1	10.1	10.1	0	6.0634	15098000	2	22.7874	19.2666
642	DERA	Q9Y315	Deoxyribose-phosphate aldolase	35.23	2	2	2	10.1	10.1	10.1	0	11.859	13344000	3	19.7602	19.7311
643	DERL1	Q9BUN8	Derlin-1	28.8	2	2	2	7.6	7.6	7.6	0	6.9537	32668000	2	18.4405	21.2682
644	DFFA	O00273	DNA fragmentation factor subunit alpha	36.521	3	3	3	13.6	13.6	13.6	0	20.166	38288000	3	18.7601	21.7416
645	DGCR14	Q96DF8	Protein DGCR14	52.567	4	4	4	8.4	8.4	8.4	0	6.2642	24130000	7	22.3667	22.7524
646	DGCR8	Q8WYQ5	Microprocessor complex subunit DGCR8	86.044	1	1	1	2.1	2.1	2.1	0.0004	3.0607	11568000	2	19.3597	17.8312
647	DHCR24	Q15392	Delta(24)-sterol reductase	60.101	8	8	8	21.5	21.5	21.5	0	16.413	316580000	14	24.2923	24.1257
648	DHCR7	Q9UBM7	7-dehydrocholesterol reductase	54.489	1	1	1	1.7	1.7	1.7	0.0010519	2.0691	15545000	2	19.0635	19.8908
649	DHRS4	Q9BTZ2;P0CG22	Dehydrogenase/reductase SDR family member 4	29.537	3	3	3	8.3	8.3	8.3	0	5.4168	30860000	6	21.8705	21.6212
650	DHRS7B	Q6IAN0	Dehydrogenase/reductase SDR family member 7B	35.119	1	1	1	3.7	3.7	3.7	0.00040225	3.0914	8259400	2	17.9432	17.399
651	DHX15	O43143	Pre-mRNA-splicing factor ATP-dependent RNA helicase DHX15	90.932	12	12	12	19.7	19.7	19.7	0	28.648	305880000	32	25.009	25.1986
652	DHX16	O60231	Putative pre-mRNA-splicing factor ATP-dependent RNA helicase DHX16	119.26	7	7	7	7.3	7.3	7.3	0	24.754	85246000	13	24.2069	23.8737
653	DHX29	Q7Z478	ATP-dependent RNA helicase DHX29	155.23	8	8	8	8.8	8.8	8.8	0	29.22	157100000	13	24.9323	25.1318
654	DHX30	Q7L2E3	Putative ATP-dependent RNA helicase DHX30	133.94	32	32	32	37.2	37.2	37.2	0	156.12	1063200000	79	26.3253	26.1992
655	DHX33	Q9H6R0	Putative ATP-dependent RNA helicase DHX33	78.873	2	2	2	3.7	3.7	3.7	0	3.6627	4014600	1	19.0112	19.2524
656	DHX34	Q14147	Probable ATP-dependent RNA helicase DHX34	128.12	3	3	3	5	5	5	0	15.142	32368000	4	21.2453	21.6487
657	DHX36	Q9H2U1	ATP-dependent RNA helicase DHX36	114.76	16	16	15	23.6	23.6	22.7	0	60.311	374940000	31	25.6547	25.7565
658	DHX37	Q8IY37	Probable ATP-dependent RNA helicase DHX37	129.54	7	7	7	8	8	8	0	17.305	117990000	11	23.906	24.0086
659	DHX38	Q92620	Pre-mRNA-splicing factor ATP-dependent RNA helicase PRP16	140.5	10	10	10	12.7	12.7	12.7	0	30.149	110490000	17	24.2184	23.9868
660	DHX40	Q8IX18	Probable ATP-dependent RNA helicase DHX40	88.559	1	1	1	1.7	1.7	1.7	0.00037622	2.5927	20226000	2	19.3273	18.5754
661	DHX57	Q6P158	Putative ATP-dependent RNA helicase DHX57	155.6	14	13	13	14	13.3	13.3	0	47.267	189230000	19	24.4118	24.1896
662	DHX9	Q08211	ATP-dependent RNA helicase A	140.96	42	42	42	39.7	39.7	39.7	0	323.31	6606000000	226	28.4917	28.4442
663	DIAPH1	O60610	Protein diaphanous homolog 1	141.35	10	10	10	13.1	13.1	13.1	0	39.966	143380000	21	24.9497	25.0864
664	DIAPH3	Q9NSV4	Protein diaphanous homolog 3	136.92	2	2	2	2.8	2.8	2.8	0	3.2919	34857000	2	23.5303	19.1798
665	DICER1	Q9UPY3	Endoribonuclease Dicer	218.68	6	6	6	4.9	4.9	4.9	0	14.664	58789000	7	22.8285	22.9619
666	DIDO1	Q9BTC0	Death-inducer obliterator 1	243.87	5	5	5	3.6	3.6	3.6	0	10.465	26409000	6	22.8072	22.759
667	DIMT1	Q9UNQ2	Probable dimethyladenosine transferase	35.236	3	3	3	12.1	12.1	12.1	0	4.3881	28781000	5	21.8011	18.6923
668	DIP2B	Q9P265;Q14689	Disco-interacting protein 2 homolog B	171.49	6	6	5	5.2	5.2	4.5	0	15.818	59149000	11	23.3863	23.4242
669	DIS3	Q9Y2L1	Exosome complex exonuclease RRP44	109	30	30	30	45.7	45.7	45.7	0	323.31	2453600000	108	28.0551	28.0723
670	DISC1;TSNAX	C4P0D8;Q99598	Translin-associated protein X	21.477	1	1	1	4.8	4.8	4.8	0.0010449	2.0159	1425200	1	19.762	20.6139
671	DLAT	P10515	Dihydrolipoyllysine-residue acetyltransferase component of pyruvate dehydrogenase complex, mitochondrial	68.996	1	1	1	2.3	2.3	2.3	0	3.1837	75554000	2	21.2833	19.6678
672	DLD	P09622	Dihydrolipoyl dehydrogenase, mitochondrial	54.177	5	5	5	11.2	11.2	11.2	0	10.315	94712000	12	24.6748	24.7955
673	DLGAP5	Q15398	Disks large-associated protein 5	95.114	7	7	7	8.6	8.6	8.6	0	31.537	38754000	14	23.0282	22.8168
674	DLST	P36957	Dihydrolipoyllysine-residue succinyltransferase component of 2-oxoglutarate dehydrogenase complex, mitochondrial	48.755	2	2	2	6.6	6.6	6.6	0	3.3278	15685000	3	20.5296	20.707
675	DMAP1	Q9NPF5	DNA methyltransferase 1-associated protein 1	52.992	2	2	2	6	6	6	0	8.5099	19621000	3	22.2269	21.3825
676	DMD	P11532	Dystrophin	426.74	4	4	4	1.2	1.2	1.2	0	7.813	45531000	6	23.7984	23.7877
677	DMPK	Q09013	Myotonin-protein kinase	69.384	1	1	1	1.7	1.7	1.7	0.00036311	2.318	8160000	2	20.2754	20.7276
678	DMXL1	Q9Y485	DmX-like protein 1	337.83	1	1	1	0.6	0.6	0.6	0.0026991	1.7764	3041400	1	19.6008	18.4768
679	DNAAF5	Q86Y56	Dynein assembly factor 5, axonemal	93.52	4	4	4	7.4	7.4	7.4	0	17.416	32662000	6	22.564	22.375
680	DNAJA1	P31689	DnaJ homolog subfamily A member 1	44.868	16	16	16	48.6	48.6	48.6	0	79.773	1019200000	44	26.3062	26.1085
681	DNAJA2	O60884	DnaJ homolog subfamily A member 2	45.745	7	7	7	27.4	27.4	27.4	0	34.642	206810000	14	24.3368	24.0467
682	DNAJA3	Q96EY1	DnaJ homolog subfamily A member 3, mitochondrial	52.488	10	10	10	24	24	24	0	35.394	298670000	22	24.5424	24.445
683	DNAJB1	P25685	DnaJ homolog subfamily B member 1	38.044	1	1	1	2.6	2.6	2.6	0.0020374	1.8294	18906000	1	18.6826	19.8976
684	DNAJB11	Q9UBS4;H7C2Y5	DnaJ homolog subfamily B member 11	40.513	6	6	6	24	24	24	0	48.654	202660000	14	23.8743	23.7753
685	DNAJB12	Q9NXW2	DnaJ homolog subfamily B member 12	41.859	7	7	7	24.3	24.3	24.3	0	12.499	49935000	9	21.8939	21.9668
686	DNAJB6;DNAJB3;DNAJB8	O75190;Q8WWF6;Q8NHS0;Q7Z6W7;P25686	DnaJ homolog subfamily B member 6;DnaJ homolog subfamily B member 3;DnaJ homolog subfamily B member 8	36.087	4	4	4	14.1	14.1	14.1	0	5.6592	96803000	4	25.0881	25.8776
687	DNAJC1	Q96KC8	DnaJ homolog subfamily C member 1	63.882	1	1	1	2.3	2.3	2.3	0.00039002	2.8769	15580000	3	20.4862	22.5993
688	DNAJC12	Q9UKB3	DnaJ homolog subfamily C member 12	23.415	1	1	1	7.1	7.1	7.1	0.00070998	2.1517	4578200	1	20.1909	18.382
689	DNAJC13	O75165	DnaJ homolog subfamily C member 13	254.41	5	5	5	2.6	2.6	2.6	0	9.4959	25680000	3	21.5209	22.0647
690	DNAJC19	Q96DA6	Mitochondrial import inner membrane translocase subunit TIM14	12.498	2	2	2	31.9	31.9	31.9	0	68.829	86183000	3	19.0176	22.6715
691	DNAJC3	Q13217	DnaJ homolog subfamily C member 3	57.579	7	7	7	22.2	22.2	22.2	0	25.449	141820000	15	25.0599	25.1709
692	DNAJC5	Q9H3Z4	DnaJ homolog subfamily C member 5	22.149	1	1	1	8.6	8.6	8.6	0.0078691	1.3336	14905000	3	20.7877	18.5218
693	DNAJC7	Q99615	DnaJ homolog subfamily C member 7	56.44	12	12	12	26.3	26.3	26.3	0	44.477	533530000	39	26.5209	26.7787
694	DNAJC9	Q8WXX5	DnaJ homolog subfamily C member 9	29.909	2	2	2	8.5	8.5	8.5	0	4.7278	13965000	3	20.2752	22.3781
695	DNM2	P50570;Q9UQ16	Dynamin-2	98.063	13	13	9	16.6	16.6	12.4	0	21.829	166580000	19	24.4156	24.3068
696	DNMT1	P26358	DNA (cytosine-5)-methyltransferase 1	183.16	21	21	21	15.3	15.3	15.3	0	62.737	756550000	51	26.8656	26.8235
697	DOCK11	Q5JSL3	Dedicator of cytokinesis protein 11	237.67	5	5	5	3	3	3	0	7.1233	31148000	6	23.5183	23.4046
698	DOCK7	Q96N67;Q96HP0;Q8NF50	Dedicator of cytokinesis protein 7	242.56	30	30	30	18.5	18.5	18.5	0	80.618	591390000	55	26.4977	26.4574
699	DOHH	Q9BU89	Deoxyhypusine hydroxylase	32.904	1	1	1	4.3	4.3	4.3	0.0010486	2.0351	4350900	2	19.2008	19.5213
700	DPF2	Q92785	Zinc finger protein ubi-d4	44.155	2	2	2	6.1	6.1	6.1	0	5.6122	38836000	6	22.7924	18.2935
701	DPH2	Q9BQC3	Diphthamide biosynthesis protein 2	52.082	2	2	2	5.7	5.7	5.7	0	3.785	39857000	5	22.6938	22.4161
702	DPH5	Q9H2P9	Diphthine synthase	31.651	8	8	8	29.8	29.8	29.8	0	19.171	117980000	13	23.2992	23.5138
703	DPM1	O60762	Dolichol-phosphate mannosyltransferase subunit 1	29.634	13	13	13	47.7	47.7	47.7	0	42.335	297050000	19	23.9223	24.1807
704	DPM3	Q9P2X0	Dolichol-phosphate mannosyltransferase subunit 3	10.094	1	1	1	10.9	10.9	10.9	0	7.0655	70165000	4	24.5792	18.6944
705	DPP9	Q86TI2	Dipeptidyl peptidase 9	98.262	2	2	2	3.8	3.8	3.8	0	3.5938	16440000	3	23.0365	22.5525
706	DPY30	Q9C005	Protein dpy-30 homolog	11.25	4	4	4	58.6	58.6	58.6	0	9.4562	200170000	10	24.1792	23.4
707	DPYSL2	Q16555	Dihydropyrimidinase-related protein 2	62.293	1	1	1	3.8	3.8	3.8	0	6.6602	4568300	1	19.4712	19.7678
708	DPYSL3;DPYS;CRMP1	Q14195;Q14117;Q14194	Dihydropyrimidinase-related protein 3;Dihydropyrimidinase;Dihydropyrimidinase-related protein 1	61.963	2	2	2	4.4	4.4	4.4	0.00039017	2.8809	28331000	5	20.935	20.7206
709	DPYSL5	Q9BPU6	Dihydropyrimidinase-related protein 5	61.421	9	9	9	23.2	23.2	23.2	0	21.811	147560000	15	25.1727	25.1015
710	DRG1	Q9Y295	Developmentally-regulated GTP-binding protein 1	40.542	11	11	11	36.8	36.8	36.8	0	40.237	231300000	24	24.5427	24.8033
711	DRG2	P55039	Developmentally-regulated GTP-binding protein 2	40.746	5	5	5	12.9	12.9	12.9	0	8.5943	119050000	12	23.8177	24.0008
712	DROSHA	Q9NRR4	Ribonuclease 3	159.31	4	4	4	4.3	4.3	4.3	0	9.5233	145110000	4	24.0148	23.9674
713	DSCC1	Q9BVC3	Sister chromatid cohesion protein DCC1	44.825	1	1	1	2.8	2.8	2.8	0.0010512	2.0604	13432000	2	22.698	18.3823
714	DSG2	Q14126	Desmoglein-2	122.29	2	2	2	2.4	2.4	2.4	0.0026864	1.7531	63064000	1	19.8304	23.3127
715	DSP	P15924	Desmoplakin	331.77	42	42	42	15	15	15	0	98.107	551570000	70	26.235	26.1199
716	DST	Q03001	Dystonin	860.65	1	1	1	0.1	0.1	0.1	0.0093545	1.2832	140680000	10	23.8384	18.3746
717	DSTN	P60981	Destrin	18.506	3	3	3	22.4	22.4	22.4	0	8.1022	231910000	7	23.1647	24.0748
718	DTNB;DTNA	O60941;Q9Y4J8	Dystrobrevin beta;Dystrobrevin alpha	71.355	3	3	3	5.7	5.7	5.7	0	7.5301	50462000	8	22.8123	23.4601
719	DTWD2	Q8NBA8	DTW domain-containing protein 2	33.415	2	2	2	11.1	11.1	11.1	0.00039746	3.0245	13751000	2	21.1435	19.217
720	DTYMK	P23919	Thymidylate kinase	23.819	4	4	4	17.9	17.9	17.9	0	5.4447	84218000	7	24.6709	24.971
721	DUS1L	Q6P1R4	tRNA-dihydrouridine(16/17) synthase [NAD(P)(+)]-like	53.23	3	3	3	9.1	9.1	9.1	0	12.727	45429000	8	23.6014	23.5101
722	DUS2	Q9NX74	tRNA-dihydrouridine(20) synthase [NAD(P)+]-like	55.05	1	1	1	3.4	3.4	3.4	0.00039936	3.0526	5710600	2	21.6709	19.1497
723	DUS3L	Q96G46;K7EMI3	tRNA-dihydrouridine(47) synthase [NAD(P)(+)]-like	72.593	11	11	11	21.1	21.1	21.1	0	49.463	166040000	19	24.7194	24.5002
724	DUSP12	Q9UNI6	Dual specificity protein phosphatase 12	37.687	1	1	1	5.6	5.6	5.6	0.00071891	2.2521	28443000	1	19.7084	19.7497
725	DUSP9	Q99956	Dual specificity protein phosphatase 9	41.867	2	2	2	6.2	6.2	6.2	0	4.8273	61389000	4	23.1357	23.02
726	DVL3	Q92997	Segment polarity protein dishevelled homolog DVL-3	78.054	1	1	1	3.8	3.8	3.8	0.0050923	1.4155	10425000	1	19.5883	18.5051
727	DYNC1H1	Q14204	Cytoplasmic dynein 1 heavy chain 1	532.4	115	115	115	32	32	32	0	323.31	3496400000	266	28.3912	28.4928
728	DYNC1I2	Q13409	Cytoplasmic dynein 1 intermediate chain 2	71.456	10	10	10	25.4	25.4	25.4	0	49.076	362050000	41	26.7001	26.8999
729	DYNC1LI1	Q9Y6G9	Cytoplasmic dynein 1 light intermediate chain 1	56.578	15	15	15	42.3	42.3	42.3	0	95.232	371020000	33	25.3505	25.3617
730	DYNC1LI2	O43237	Cytoplasmic dynein 1 light intermediate chain 2	54.099	3	3	3	8.7	8.7	8.7	0	18.299	43712000	8	23.2494	23.5085
731	DYNC2H1	Q8NCM8	Cytoplasmic dynein 2 heavy chain 1	492.62	4	4	4	1.1	1.1	1.1	0	3.5265	69301000	3	22.5912	17.1182
732	DYNC2LI1	Q8TCX1	Cytoplasmic dynein 2 light intermediate chain 1	39.624	1	1	1	4.3	4.3	4.3	0	3.2364	7530600	2	21.8458	19.0118
733	DYNLL1;DYNLL2	P63167;Q96FJ2	Dynein light chain 1, cytoplasmic;Dynein light chain 2, cytoplasmic	10.366	3	3	3	57.3	57.3	57.3	0	8.2255	460760000	17	24.2163	24.1638
734	DYNLRB1;DYNLRB2	Q9NP97;Q8TF09	Dynein light chain roadblock-type 1;Dynein light chain roadblock-type 2	10.921	3	3	3	21.9	21.9	21.9	0	8.9444	106280000	9	25.1049	24.881
735	DYNLT1	P63172	Dynein light chain Tctex-type 1	12.452	2	2	2	30.1	30.1	30.1	0	5.2767	93965000	4	22.5644	18.9525
736	E4F1	Q66K89	Transcription factor E4F1	83.495	1	1	1	1.9	1.9	1.9	0	4.9765	12632000	1	19.2372	22.4211
737	EARS2	Q5JPH6	Probable glutamate--tRNA ligase, mitochondrial	58.688	3	3	3	7.5	7.5	7.5	0	6.4642	62388000	5	22.3202	22.489
738	EBNA1BP2	Q99848	Probable rRNA-processing protein EBP2	34.852	1	1	1	3.3	3.3	3.3	0.00071505	2.2094	16014000	3	23.1892	18.8943
739	EBP	Q15125	3-beta-hydroxysteroid-Delta(8),Delta(7)-isomerase	26.352	1	1	1	7	7	7	0	3.8305	103670000	6	22.3104	17.5429
740	ECD	O95905	Protein SGT1	72.757	4	4	4	7.6	7.6	7.6	0	12.939	51636000	6	21.458	21.4163
741	ECHDC1	Q9NTX5	Ethylmalonyl-CoA decarboxylase	33.698	7	7	7	33.9	33.9	33.9	0	15.333	100710000	13	22.472	22.7591
742	ECHS1	P30084	Enoyl-CoA hydratase, mitochondrial	31.387	5	5	5	19	19	19	0	13.039	175400000	13	23.6138	23.6052
743	ECM29	Q5VYK3	Proteasome-associated protein ECM29 homolog	204.29	13	13	13	8.8	8.8	8.8	0	56.478	124660000	20	23.1949	23.2998
744	ECSIT	Q9BQ95	Evolutionarily conserved signaling intermediate in Toll pathway, mitochondrial	49.148	1	1	1	6.3	6.3	6.3	0	8.4144	9483000	2	20.0797	19.2881
745	ECT2	Q9H8V3	Protein ECT2	103.5	2	2	2	2.7	2.7	2.7	0	4.3381	8768300	2	20.7167	17.5585
746	EDC3	Q96F86	Enhancer of mRNA-decapping protein 3	56.077	7	7	7	18.7	18.7	18.7	0	10.255	104750000	13	23.5572	23.7153
747	EDC4	Q6P2E9	Enhancer of mRNA-decapping protein 4	151.66	11	11	11	11.2	11.2	11.2	0	42.893	337960000	19	24.3476	24.2673
748	EDF1	O60869	Endothelial differentiation-related factor 1	16.368	18	18	18	67.6	67.6	67.6	0	212.01	11062000000	115	31.5497	31.5761
749	EDRF1	Q3B7T1	Erythroid differentiation-related factor 1	138.53	4	4	4	4.5	4.5	4.5	0	8.39	72467000	6	22.9583	22.8144
750	EEA1	Q15075	Early endosome antigen 1	162.46	13	13	13	11.9	11.9	11.9	0	27.352	86910000	17	24.4859	24.4
751	EEF1A1;EEF1A1P5;EEF1A2	P68104;Q5VTE0;Q05639	Elongation factor 1-alpha 1;Putative elongation factor 1-alpha-like 3;Elongation factor 1-alpha 2	50.14	21	21	21	51.3	51.3	51.3	0	323.31	18682000000	219	30.0783	30.2112
752	EEF1B2	P24534	Elongation factor 1-beta	24.763	6	6	6	27.6	27.6	27.6	0	41.574	1894100000	36	25.8742	26.1266
753	EEF1D	P29692	Elongation factor 1-delta	31.121	11	11	11	44.5	44.5	44.5	0	166.9	4980100000	74	28.2856	28.2132
754	EEF1E1-BLOC1S5;EEF1E1	C9J1V9;O43324	Eukaryotic translation elongation factor 1 epsilon-1	17.017	8	8	8	60.3	60.3	60.3	0	26.761	254900000	14	24.219	24.1905
755	EEF1G	P26641	Elongation factor 1-gamma	50.118	27	27	27	67	67	67	0	195.1	11622000000	232	29.7376	29.7598
756	EEF2	P13639	Elongation factor 2	95.337	36	36	35	46.2	46.2	45	0	209.34	4810000000	198	28.7932	28.9022
757	EEFSEC	P57772	Selenocysteine-specific elongation factor	65.304	2	2	2	4.9	4.9	4.9	0	4.8525	19158000	4	22.9466	22.9337
758	EFCAB5	A4FU69	EF-hand calcium-binding domain-containing protein 5	173.4	2	2	2	1.6	1.6	1.6	0.0078641	1.3324	1852200	0	17.8952	18.567
759	EFTUD2	Q15029	116 kDa U5 small nuclear ribonucleoprotein component	109.43	32	31	31	42	40.9	40.9	0	181.39	1336200000	87	26.2836	26.354
760	EGLN1	Q9GZT9;Q9H6Z9	Egl nine homolog 1	46.02	6	6	6	17.8	17.8	17.8	0	19.167	102870000	17	25.1538	25.2579
761	EHD1;EHD3	Q9H4M9;Q9NZN3;Q9NZN4	EH domain-containing protein 1;EH domain-containing protein 3	60.626	3	3	3	6.4	6.4	6.4	0	5.784	32020000	3	21.1642	21.0671
762	EHHADH	Q08426	Peroxisomal bifunctional enzyme;Enoyl-CoA hydratase/3,2-trans-enoyl-CoA isomerase;3-hydroxyacyl-CoA dehydrogenase	79.494	1	1	1	1.4	1.4	1.4	0.0026918	1.7636	4151000	2	21.2286	19.5875
763	EHMT1	Q9H9B1	Histone-lysine N-methyltransferase EHMT1	141.46	1	1	1	1.2	1.2	1.2	0.0003663	2.3893	17207000	2	21.764	19.7151
764	EHMT2	Q96KQ7	Histone-lysine N-methyltransferase EHMT2	132.37	1	1	1	2.2	2.2	2.2	0	4.4599	15834000	2	18.6661	20.5713
765	EIF1AX;EIF1AY	P47813;O14602	Eukaryotic translation initiation factor 1A, X-chromosomal;Eukaryotic translation initiation factor 1A, Y-chromosomal	16.46	5	5	5	36.1	36.1	36.1	0	113.39	1405500000	41	27.1244	27.1442
766	EIF2A	Q9BY44	Eukaryotic translation initiation factor 2A;Eukaryotic translation initiation factor 2A, N-terminally processed	64.989	16	16	16	39.3	39.3	39.3	0	74.801	662680000	50	26.155	26.1948
767	EIF2AK2	P19525	Interferon-induced, double-stranded RNA-activated protein kinase	62.094	9	9	9	18.7	18.7	18.7	0	64.668	305560000	20	25.0484	25.0968
768	EIF2B1	Q14232	Translation initiation factor eIF-2B subunit alpha	33.712	3	3	3	11.1	11.1	11.1	0	7.4721	47904000	3	18.6423	20.8755
769	EIF2B3	Q9NR50	Translation initiation factor eIF-2B subunit gamma	50.24	4	4	4	11.5	11.5	11.5	0	7.657	40265000	5	23.5064	23.8628
770	EIF2B4	Q9UI10	Translation initiation factor eIF-2B subunit delta	57.557	8	8	8	18.4	18.4	18.4	0	24.836	144150000	15	22.9934	22.9758
771	EIF2B5	Q13144	Translation initiation factor eIF-2B subunit epsilon	80.379	6	6	6	11.1	11.1	11.1	0	13.273	119220000	11	22.6719	22.4252
772	EIF2D	P41214	Eukaryotic translation initiation factor 2D	64.706	7	7	7	20	20	20	0	26.401	188010000	11	25.0844	24.9782
773	EIF2S1	P05198	Eukaryotic translation initiation factor 2 subunit 1	36.112	20	20	20	57.5	57.5	57.5	0	88.848	1404800000	74	28.5221	28.3327
774	EIF2S2	P20042	Eukaryotic translation initiation factor 2 subunit 2	38.388	14	14	14	42.3	42.3	42.3	0	205.37	864240000	61	27.0711	27.1705
775	EIF2S3;EIF2S3L	P41091;Q2VIR3	Eukaryotic translation initiation factor 2 subunit 3;Putative eukaryotic translation initiation factor 2 subunit 3-like protein	51.109	11	11	11	28.8	28.8	28.8	0	92.216	1388700000	51	26.7184	26.738
776	EIF3A	Q14152	Eukaryotic translation initiation factor 3 subunit A	166.57	46	46	46	33.3	33.3	33.3	0	186.86	2418000000	140	27.6557	27.692
777	EIF3B	P55884	Eukaryotic translation initiation factor 3 subunit B	92.48	30	30	30	46.6	46.6	46.6	0	214.83	1315100000	84	26.6486	26.8042
778	EIF3C;EIF3CL	Q99613;B5ME19	Eukaryotic translation initiation factor 3 subunit C;Eukaryotic translation initiation factor 3 subunit C-like protein	105.34	21	21	21	24.1	24.1	24.1	0	224.78	1551300000	89	27.9924	27.9191
779	EIF3D	O15371	Eukaryotic translation initiation factor 3 subunit D	63.972	17	17	17	39.2	39.2	39.2	0	161.16	1203800000	53	26.4074	26.2749
780	EIF3E	P60228	Eukaryotic translation initiation factor 3 subunit E	52.22	14	14	14	31.2	31.2	31.2	0	150.47	774320000	53	26.4804	26.515
781	EIF3F	O00303	Eukaryotic translation initiation factor 3 subunit F	37.563	11	11	11	37	37	37	0	48.369	701910000	33	24.8901	24.934
782	EIF3G	O75821	Eukaryotic translation initiation factor 3 subunit G	35.611	10	10	10	25.9	25.9	25.9	0	66.143	301550000	30	25.2775	25.4649
783	EIF3H	O15372	Eukaryotic translation initiation factor 3 subunit H	39.93	9	9	9	39.5	39.5	39.5	0	58.836	295150000	38	24.8131	24.8577
784	EIF3I	Q13347	Eukaryotic translation initiation factor 3 subunit I	36.501	10	10	10	43.4	43.4	43.4	0	154.63	956050000	36	26.3351	26.3413
785	EIF3K	Q9UBQ5	Eukaryotic translation initiation factor 3 subunit K	25.059	5	5	5	27.5	27.5	27.5	0	16.243	202290000	13	23.2323	23.6118
786	EIF3L	Q9Y262	Eukaryotic translation initiation factor 3 subunit L	66.726	17	17	17	39.5	39.5	39.5	0	214.42	631990000	47	26.0687	25.9123
787	EIF3M	Q7L2H7	Eukaryotic translation initiation factor 3 subunit M	42.502	9	9	9	36.9	36.9	36.9	0	93.632	416270000	21	24.5425	24.543
788	EIF4A1	P60842	Eukaryotic initiation factor 4A-I	46.153	34	34	21	73.6	73.6	50.7	0	323.31	21964000000	391	30.3473	30.3423
789	EIF4A2	Q14240	Eukaryotic initiation factor 4A-II;Eukaryotic initiation factor 4A-II, N-terminally processed	46.402	19	6	6	48.6	20.4	20.4	0	28.033	101600000	7	22.4053	22.2716
790	EIF4A3	P38919	Eukaryotic initiation factor 4A-III;Eukaryotic initiation factor 4A-III, N-terminally processed	46.871	22	19	19	55	48.9	48.9	0	74.478	1218800000	67	26.8649	26.6288
791	EIF4E	P06730;A6NMX2	Eukaryotic translation initiation factor 4E	25.097	5	5	5	34.1	34.1	34.1	0	30.118	526580000	33	24.9015	24.9003
792	EIF4E2	O60573	Eukaryotic translation initiation factor 4E type 2	28.362	11	11	11	55.9	55.9	55.9	0	156.41	1209900000	51	27.2395	26.9774
793	EIF4G1	Q04637;REV__Q8NEG2	Eukaryotic translation initiation factor 4 gamma 1	175.49	68	68	65	40.4	40.4	38.5	0	323.31	11989000000	333	30.7003	30.6254
794	EIF4G2	P78344	Eukaryotic translation initiation factor 4 gamma 2	102.36	25	25	25	32.6	32.6	32.6	0	259.14	1152100000	81	27.0042	26.9928
795	EIF4G3	O43432	Eukaryotic translation initiation factor 4 gamma 3	176.65	16	13	13	11.7	9.8	9.8	0	26.368	126300000	19	25.2076	25.1712
796	EIF4H	Q15056	Eukaryotic translation initiation factor 4H	27.385	6	6	6	38.3	38.3	38.3	0	29.242	475650000	23	25.675	25.6481
797	EIF5	P55010	Eukaryotic translation initiation factor 5	49.222	9	9	9	22.3	22.3	22.3	0	18.996	300660000	18	25.1394	25.2313
798	EIF5A	P63241;Q6IS14;Q9GZV4	Eukaryotic translation initiation factor 5A-1	16.832	10	10	10	39.6	39.6	39.6	0	209.06	2898000000	83	27.7853	27.823
799	EIF5B	O60841	Eukaryotic translation initiation factor 5B	138.83	2	2	2	2.1	2.1	2.1	0	6.4132	23527000	4	20.9786	20.8196
800	EIF6	P56537;A0A0U1RQV5	Eukaryotic translation initiation factor 6	26.599	2	2	2	9.8	9.8	9.8	0	6.4591	89218000	6	22.8578	22.8228
801	ELAC2	Q9BQ52	Zinc phosphodiesterase ELAC protein 2	92.218	17	17	17	29.4	29.4	29.4	0	92.119	604540000	32	25.842	25.8738
802	ELAVL1	Q15717;Q12926;P26378	ELAV-like protein 1	36.091	16	16	16	52.8	52.8	52.8	0	118.88	1345400000	56	26.3255	26.3627
803	EMC1	Q8N766	ER membrane protein complex subunit 1	111.76	6	6	6	9.1	9.1	9.1	0	29.055	75506000	9	22.966	23.2956
804	EMC2	Q15006	ER membrane protein complex subunit 2	34.833	4	4	4	19.5	19.5	19.5	0	10.642	40908000	4	21.8739	22.7123
805	EMC7	Q9NPA0	ER membrane protein complex subunit 7	26.47	2	2	2	8.7	8.7	8.7	0.0010623	2.1184	22620000	2	17.1887	20.5767
806	EMD	P50402	Emerin	28.994	15	15	15	65	65	65	0	127.16	1313200000	42	26.9908	26.9076
807	EML1;EML2	O00423;O95834	Echinoderm microtubule-associated protein-like 1;Echinoderm microtubule-associated protein-like 2	89.86	2	2	2	2.6	2.6	2.6	0	4.0734	13099000	5	21.7821	21.4025
808	EML4	Q9HC35	Echinoderm microtubule-associated protein-like 4	108.91	23	23	23	29	29	29	0	140.76	1077600000	74	26.8655	26.6313
809	ENAH	Q8N8S7	Protein enabled homolog	66.509	1	1	1	3.7	3.7	3.7	0	16.629	32758000	3	24.3082	23.6887
810	ENO1	P06733	Alpha-enolase	47.168	4	4	4	9.2	9.2	9.2	0	3.6047	248070000	11	24.3024	23.9942
811	ENOPH1	Q9UHY7	Enolase-phosphatase E1	28.932	1	1	1	8.4	8.4	8.4	0.0093226	1.2715	35335000	2	20.3882	17.5998
812	EPB41	P11171	Protein 4.1	97.016	8	8	8	12	12	12	0	18.995	115420000	13	24.98	24.8771
813	EPB41L2	O43491	Band 4.1-like protein 2	112.59	20	20	20	27.3	27.3	27.3	0	107.03	652420000	46	26.8832	26.8749
814	EPB41L3	Q9Y2J2	Band 4.1-like protein 3;Band 4.1-like protein 3, N-terminally processed	120.68	8	8	8	9.3	9.3	9.3	0	25.893	209890000	17	26.3051	26.3899
815	EPHX1	P07099	Epoxide hydrolase 1	52.948	5	5	5	12.3	12.3	12.3	0	5.2489	38759000	5	22.109	21.5158
816	EPPK1	P58107	Epiplakin	555.65	2	2	2	2.5	2.5	2.5	0.00036711	2.4009	23250000	2	18.1115	22.2603
817	EPRS	P07814	Bifunctional glutamate/proline--tRNA ligase;Glutamate--tRNA ligase;Proline--tRNA ligase	170.59	76	76	75	55.4	55.4	55.4	0	323.31	12265000000	332	30.5114	30.54
818	EPS8	Q12929	Epidermal growth factor receptor kinase substrate 8	91.88	3	3	3	5.8	5.8	5.8	0	11.193	27957000	4	21.1153	21.2784
819	ERAL1	O75616	GTPase Era, mitochondrial	48.349	3	3	3	11.9	11.9	11.9	0	3.4243	34097000	3	19.6214	20.7474
820	ERCC2	P18074	TFIIH basal transcription factor complex helicase XPD subunit	86.908	1	1	1	3.3	3.3	3.3	0.0013713	1.8971	4911900	1	19.765	18.4534
821	ERCC3	P19447	TFIIH basal transcription factor complex helicase XPB subunit	89.277	2	2	2	3.8	3.8	3.8	0	5.3943	32926000	6	23.3206	23.2974
822	ERCC4	Q92889	DNA repair endonuclease XPF	104.48	2	2	2	3.9	3.9	3.9	0	11.494	717750000	3	27.2255	27.0228
823	ERCC6L	Q2NKX8	DNA excision repair protein ERCC-6-like	141.1	2	2	2	3.4	3.4	3.4	0	6.1978	16155000	3	19.984	20.0253
824	ERGIC1	Q969X5	Endoplasmic reticulum-Golgi intermediate compartment protein 1	32.592	4	4	4	17.9	17.9	17.9	0	5.8735	44535000	3	20.779	20.5406
825	ERGIC2	Q96RQ1	Endoplasmic reticulum-Golgi intermediate compartment protein 2	42.548	1	1	1	3.4	3.4	3.4	0.002036	1.8269	9107800	1	18.1571	18.0281
826	ERH	P84090	Enhancer of rudimentary homolog	12.259	3	3	3	29.8	29.8	29.8	0	30.882	156330000	7	22.5397	21.8443
827	ERI3	O43414	ERI1 exoribonuclease 3	37.238	1	1	1	2.7	2.7	2.7	0.004229	1.5495	26793000	2	22.4566	18.0254
828	ERLIN2;ERLIN1	O94905;O75477	Erlin-2;Erlin-1	37.839	3	3	3	10.6	10.6	10.6	0	9.4277	38082000	6	23.1947	23.5619
829	ERP44	Q9BS26	Endoplasmic reticulum resident protein 44	46.971	12	12	12	43.1	43.1	43.1	0	176.89	378400000	31	25.5924	25.2987
830	ESD	P10768	S-formylglutathione hydrolase	31.462	5	5	5	34.4	34.4	34.4	0	25.693	480290000	14	24.8964	24.6306
831	ESF1	Q9H501	ESF1 homolog	98.795	3	3	3	5.6	5.6	5.6	0	4.0209	21514000	6	22.6596	22.399
832	ESRRA	P11474	Steroid hormone receptor ERR1	45.509	1	1	1	3.8	3.8	3.8	0	6.0412	5953900	2	18.6426	19.4679
833	ESYT1	Q9BSJ8	Extended synaptotagmin-1	122.85	8	8	8	9.4	9.4	9.4	0	15.897	138800000	8	23.5469	23.4265
834	ESYT2	A0FGR8	Extended synaptotagmin-2	102.36	5	5	5	8.1	8.1	8.1	0	6.9649	51669000	6	23.0259	22.8704
835	ETFA	P13804	Electron transfer flavoprotein subunit alpha, mitochondrial	35.079	11	11	11	53.8	53.8	53.8	0	71.576	1008100000	35	26.1614	26.0106
836	ETFB	P38117	Electron transfer flavoprotein subunit beta	27.843	10	10	10	40.4	40.4	40.4	0	24.406	771970000	35	26.9382	26.6671
837	ETFDH	Q16134	Electron transfer flavoprotein-ubiquinone oxidoreductase, mitochondrial	68.495	1	1	1	1.8	1.8	1.8	0.00038066	2.6774	3906300	1	20.6215	17.9594
838	ETHE1	O95571	Persulfide dioxygenase ETHE1, mitochondrial	27.873	2	2	2	12.2	12.2	12.2	0	5.8515	21696000	4	21.525	21.4386
839	EWSR1	Q01844	RNA-binding protein EWS	68.477	6	6	6	13.1	13.1	13.1	0	36.235	450710000	26	25.3534	25.0608
840	EXD2	Q9NVH0	Exonuclease 3-5 domain-containing protein 2	70.352	4	4	4	9	9	9	0	13.038	65039000	4	23.6691	23.5112
841	EXOC1	Q9NV70	Exocyst complex component 1	101.98	4	4	4	6.4	6.4	6.4	0	10.865	38815000	5	23.5283	23.5041
842	EXOC3	O60645	Exocyst complex component 3	86.844	3	3	3	5	5	5	0	4.601	29357000	6	21.3118	21.1989
843	EXOC4	Q96A65	Exocyst complex component 4	110.5	5	5	5	6.6	6.6	6.6	0	26.154	71507000	8	24.3765	23.9821
844	EXOC6	Q8TAG9	Exocyst complex component 6	93.721	1	1	1	1.9	1.9	1.9	0	6.1406	6176400	1	17.6016	21.1347
845	EXOC8	Q8IYI6	Exocyst complex component 8	81.798	4	4	4	7.4	7.4	7.4	0	14.879	61595000	7	24.5046	24.4887
846	EXOSC1	Q9Y3B2	Exosome complex component CSL4	21.452	4	4	4	21.5	21.5	21.5	0	4.4137	61205000	7	22.4028	22.5146
847	EXOSC10	Q01780	Exosome component 10	100.83	5	5	5	7.9	7.9	7.9	0	12.2	75238000	12	22.4019	22.2549
848	EXOSC2	Q13868	Exosome complex component RRP4	32.789	2	2	2	12.3	12.3	12.3	0	4.0817	12540000	3	21.4828	18.4888
849	EXOSC3	Q9NQT5	Exosome complex component RRP40	29.572	3	3	3	21.5	21.5	21.5	0	25.867	86685000	8	22.6113	22.6521
850	EXOSC6	Q5RKV6	Exosome complex component MTR3	28.235	1	1	1	10.3	10.3	10.3	0.0010501	2.0488	7743000	1	19.5649	18.6653
851	EXOSC8	Q96B26	Exosome complex component RRP43	30.039	1	1	1	9.8	9.8	9.8	0.0010446	2.0124	8728700	2	18.4376	18.9744
852	EXOSC9	Q06265	Exosome complex component RRP45	48.948	3	3	3	7.3	7.3	7.3	0	7.9117	72420000	4	22.7146	23.0537
853	EYA3	Q99504	Eyes absent homolog 3	62.662	2	2	2	7.2	7.2	7.2	0	4.99	11476000	3	18.8626	21.2842
854	EZH1	Q92800	Histone-lysine N-methyltransferase EZH1	85.27	3	3	2	5.9	5.9	4.1	0.0003864	2.7825	7055000	3	19.1724	19.1348
855	F8A1	P23610	Factor VIII intron 22 protein	39.103	1	1	1	3	3	3	0.0029713	1.6258	8077200	2	20.8827	18.7678
856	FABP5	Q01469	Fatty acid-binding protein, epidermal	15.164	4	4	4	19.3	19.3	19.3	0	10.339	317310000	15	25.8305	25.4892
857	FAF2	Q96CS3	FAS-associated factor 2	52.623	9	9	9	29.7	29.7	29.7	0	67.319	491070000	27	24.2758	24.2775
858	FAHD1	Q6P587	Acylpyruvase FAHD1, mitochondrial	24.843	2	2	2	21	21	21	0	12.903	68581000	3	21.6227	21.5513
859	FAIM	Q9NVQ4	Fas apoptotic inhibitory molecule 1	20.215	4	4	4	33	33	33	0	7.4167	81511000	14	23.8709	24.1076
860	FAM120A	Q9NZB2;Q5T035	Constitutive coactivator of PPAR-gamma-like protein 1	121.89	10	10	10	12.3	12.3	12.3	0	38.816	266870000	19	25.419	25.4794
861	FAM120B	Q96EK7	Constitutive coactivator of peroxisome proliferator-activated receptor gamma	103.78	1	1	1	2.6	2.6	2.6	0.0023697	1.8032	6775200	1	19.3071	18.8313
862	FAM133B;FAM133A	Q5BKY9;Q8N9E0	Protein FAM133B;Protein FAM133A	28.385	1	1	1	3.2	3.2	3.2	0.0053985	1.3972	20786000	4	23.5517	18.9975
863	FAM162A	Q96A26	Protein FAM162A	17.342	3	3	3	21.4	21.4	21.4	0	18.759	89162000	11	22.2367	22.3322
864	FAM175B	Q15018	BRISC complex subunit Abro1	46.9	3	3	3	8.7	8.7	8.7	0	6.7879	50268000	3	21.7903	21.7064
865	FAM177B	A6PVY3	Protein FAM177B	18.145	1	1	1	8.2	8.2	8.2	0.0078715	1.3353	24695000	2	22.1393	20.375
866	FAM207A	Q9NSI2	Protein FAM207A	25.456	2	2	2	9.6	9.6	9.6	0.00071685	2.2277	27694000	3	21.1003	20.8981
867	FAM208A	Q9UK61	Protein FAM208A	189.03	41	41	41	31.4	31.4	31.4	0	276.8	2301900000	116	27.4024	27.1999
868	FAM213A	Q9BRX8	Redox-regulatory protein FAM213A	25.764	1	1	1	5.2	5.2	5.2	0.0013774	1.9425	3958900	1	18.4857	20.0732
869	FAM49B	Q9NUQ9	Protein FAM49B	36.748	2	2	2	10.2	10.2	10.2	0	7.5026	73342000	6	25.0623	24.8528
870	FAM83H	Q6ZRV2	Protein FAM83H	127.12	17	17	17	19.5	19.5	19.5	0	56.411	303210000	27	25.9784	25.9555
871	FAM96B	Q9Y3D0	Mitotic spindle-associated MMXD complex subunit MIP18	17.663	4	4	4	41.7	41.7	41.7	0	13.203	107420000	11	23.8679	23.5355
872	FAM98A	Q8NCA5	Protein FAM98A	55.4	8	7	7	21.6	18.9	18.9	0	64.285	366430000	24	24.6453	24.5394
873	FAM98B	Q52LJ0	Protein FAM98B	37.19	9	9	8	40.6	40.6	36.4	0	61.704	409830000	22	25.3726	25.2746
874	FANCB	Q8NB91	Fanconi anemia group B protein	97.725	1	1	1	0.8	0.8	0.8	0.009054	1.2962	261610000	13	25.3249	18.9086
875	FANCD2	Q9BXW9	Fanconi anemia group D2 protein	164.13	2	2	2	1.8	1.8	1.8	0	5.231	17410000	3	23.6185	19.6155
876	FANCI	Q9NVI1	Fanconi anemia group I protein	149.32	7	7	7	8.1	8.1	8.1	0	32.275	151760000	14	24.3726	24.1917
877	FAR1	Q8WVX9	Fatty acyl-CoA reductase 1	59.356	3	3	3	7.4	7.4	7.4	0	4.4713	42613000	2	20.9936	19.0304
878	FARSA	Q9Y285	Phenylalanine--tRNA ligase alpha subunit	57.563	15	15	15	43.3	43.3	43.3	0	266.46	1671200000	74	27.852	27.702
879	FARSB	Q9NSD9	Phenylalanine--tRNA ligase beta subunit	66.115	15	15	15	28.5	28.5	28.5	0	49.876	1164400000	56	26.4045	26.3888
880	FASN	P49327	Fatty acid synthase;[Acyl-carrier-protein] S-acetyltransferase;[Acyl-carrier-protein] S-malonyltransferase;3-oxoacyl-[acyl-carrier-protein] synthase;3-oxoacyl-[acyl-carrier-protein] reductase;3-hydroxyacyl-[acyl-carrier-protein] dehydratase;Enoyl-[acyl-carrier-protein] reductase;Oleoyl-[acyl-carrier-protein] hydrolase	273.42	104	104	104	52.4	52.4	52.4	0	323.31	30237000000	698	30.9675	30.89
881	FASTKD2	Q9NYY8	FAST kinase domain-containing protein 2	81.462	2	2	2	3.4	3.4	3.4	0	3.3242	11952000	1	19.8509	20.8594
882	FASTKD3	Q14CZ7	FAST kinase domain-containing protein 3	75.688	1	1	1	1.4	1.4	1.4	0.0036066	1.5865	5432900	2	18.448	20.386
883	FASTKD5	Q7L8L6	FAST kinase domain-containing protein 5	86.573	6	6	6	8.4	8.4	8.4	0	12.703	113290000	14	25.0175	25.1524
884	FBL	P22087	rRNA 2-O-methyltransferase fibrillarin	33.784	6	6	5	28	28	24.6	0	19.329	422480000	20	24.8635	24.7633
885	FBLL1	A6NHQ2	rRNA/tRNA 2-O-methyltransferase fibrillarin-like protein 1	34.803	2	1	1	6.6	3.3	3.3	0.00036751	2.4173	18809000	4	21.2969	20.2057
886	FBRS	Q9HAH7	Probable fibrosin-1	48.388	2	2	2	7	7	7	0	3.6812	25824000	2	20.2568	18.8506
887	FBXL18	Q96ME1	F-box/LRR-repeat protein 18	88.34	3	3	3	4	4	4	0	6.1454	13832000	3	20.3143	20.2084
888	FBXO11	Q86XK2	F-box only protein 11	103.58	2	2	2	3.8	3.8	3.8	0	4.6414	19562000	3	19.386	18.9072
889	FBXO7	Q9Y3I1	F-box only protein 7	58.502	3	3	3	9	9	9	0	6.5185	50681000	4	20.6096	20.4924
890	FCHO2	Q0JRZ9	F-BAR domain only protein 2	88.923	8	8	8	12.8	12.8	12.8	0	33.292	161650000	13	23.6063	23.4059
891	FCHSD2	O94868	F-BAR and double SH3 domains protein 2	84.275	2	2	2	4.5	4.5	4.5	0	12.729	7873400	2	19.5226	22.1329
892	FDFT1	P37268	Squalene synthase	48.115	2	2	2	7	7	7	0.00039231	2.9211	27464000	2	21.1839	20.1463
893	FDPS	P14324	Farnesyl pyrophosphate synthase	48.275	7	7	7	23.9	23.9	23.9	0	29.854	562390000	18	25.3209	25.1258
894	FECH	P22830	Ferrochelatase, mitochondrial	47.862	2	2	2	6.9	6.9	6.9	0	4.0879	6093300	1	18.4298	20.3012
895	FEN1	P39748	Flap endonuclease 1	42.592	16	16	15	44.2	44.2	42.4	0	198.45	2703200000	80	28.5779	28.5471
896	FER	P16591	Tyrosine-protein kinase Fer	94.637	3	3	3	4.1	4.1	4.1	0	3.7524	21204000	3	21.8924	18.8382
897	FERMT2	Q96AC1	Fermitin family homolog 2	77.86	8	8	8	16	16	16	0	28.303	184060000	16	23.4011	23.4939
898	FGB	P02675	Fibrinogen beta chain;Fibrinopeptide B;Fibrinogen beta chain	55.928	1	1	1	2.6	2.6	2.6	0.00037341	2.5403	5491800	1	20.6781	19.6957
899	FH	P07954	Fumarate hydratase, mitochondrial	54.636	1	1	1	4.1	4.1	4.1	0.003928	1.5762	10822000	1	18.204	20.6946
900	FHL1	Q13642	Four and a half LIM domains protein 1	36.263	5	5	5	23.2	23.2	23.2	0	32.134	726490000	14	26.1476	26.0066
901	FHOD1	Q9Y613	FH1/FH2 domain-containing protein 1	126.55	4	4	4	5.9	5.9	5.9	0	7.5103	32585000	3	19.9007	18.3072
902	FIP1L1	Q6UN15;A0A0B4J203	Pre-mRNA 3-end-processing factor FIP1	66.526	10	10	10	25.6	25.6	25.6	0	60.461	565350000	19	25.5694	25.3915
903	FIS1	Q9Y3D6	Mitochondrial fission 1 protein	16.937	1	1	1	10.5	10.5	10.5	0	24.753	55503000	2	21.0805	19.5058
904	FKBP15	Q5T1M5	FK506-binding protein 15	133.63	1	1	1	1	1	1	0.0013765	1.9373	5844600	2	21.4363	19.1083
905	FKBP4	Q02790	Peptidyl-prolyl cis-trans isomerase FKBP4;Peptidyl-prolyl cis-trans isomerase FKBP4, N-terminally processed	51.804	21	21	21	60.8	60.8	60.8	0	164.88	1343900000	67	27.0244	27.0191
906	FKBP5	Q13451	Peptidyl-prolyl cis-trans isomerase FKBP5;Peptidyl-prolyl cis-trans isomerase FKBP5, N-terminally processed	51.212	16	16	16	49.9	49.9	49.9	0	74.591	297610000	32	26.0375	26.1965
907	FKBP8	Q14318	Peptidyl-prolyl cis-trans isomerase FKBP8	44.561	4	4	4	18.2	18.2	18.2	0	23.747	48009000	3	21.0676	20.2065
908	FLAD1	Q8NFF5	FAD synthase;Molybdenum cofactor biosynthesis protein-like region;FAD synthase region	65.265	2	2	2	5.1	5.1	5.1	0	5.0518	16636000	3	19.1735	18.3186
909	FLII	Q13045	Protein flightless-1 homolog	144.75	5	5	5	5.1	5.1	5.1	0	12.219	63120000	7	22.1221	22.0932
910	FLNA	P21333	Filamin-A	280.74	47	47	45	28.3	28.3	28	0	191.13	1565800000	102	26.8644	27.0948
911	FLNB	O75369	Filamin-B	278.16	4	2	2	1.8	1.1	1.1	0.0029762	1.6375	9881600	2	21.4336	21.3233
912	FLOT1	O75955	Flotillin-1	47.355	2	2	2	5.4	5.4	5.4	0	3.9409	15445000	4	21.9795	21.8387
913	FLOT2	Q14254	Flotillin-2	47.064	1	1	1	2.6	2.6	2.6	0.0010504	2.0513	3570000	2	20.6491	18.0929
914	FN1	P02751	Fibronectin;Anastellin;Ugl-Y1;Ugl-Y2;Ugl-Y3	262.62	1	1	1	0.5	0.5	0.5	0.00036738	2.4128	4861800	2	18.8233	21.3335
915	FOXC1	Q12948	Forkhead box protein C1	56.788	1	1	1	2.2	2.2	2.2	0.003004	1.7017	11000000	3	18.4615	20.0847
916	FOXK1	P85037	Forkhead box protein K1	75.456	1	1	1	1.1	1.1	1.1	0.0098979	1.2464	9446500	1	20.8978	18.598
917	FOXRED2	Q8IWF2	FAD-dependent oxidoreductase domain-containing protein 2	77.79	19	19	19	41.2	41.2	41.2	0	189.91	1434700000	61	26.4176	26.311
918	FRYL	O94915	Protein furry homolog-like	339.59	5	5	5	2.4	2.4	2.4	0	12.349	29875000	4	22.4468	22.2325
919	FSCN1	Q16658	Fascin	54.529	11	11	11	32.5	32.5	32.5	0	82.924	333970000	24	24.4381	24.3277
920	FTH1	P02794	Ferritin heavy chain;Ferritin heavy chain, N-terminally processed	21.225	3	3	3	16.4	16.4	16.4	0	3.9076	35514000	4	23.1972	22.9569
921	FTSJ3	Q8IY81	pre-rRNA processing protein FTSJ3	96.557	4	4	4	10	10	10	0	15.714	26420000	5	21.4206	21.978
922	FUBP1	Q96AE4	Far upstream element-binding protein 1	67.56	4	3	3	6.2	4.8	4.8	0	4.3532	43021000	6	18.8891	22.0372
923	FUBP3	Q96I24	Far upstream element-binding protein 3	61.64	17	17	16	39.7	39.7	38.1	0	42.242	824120000	53	26.0908	26.0816
924	FUS	P35637	RNA-binding protein FUS	53.425	10	10	8	21.3	21.3	21.3	0	183.08	3095500000	72	27.8069	27.8059
925	FUT8	Q9BYC5	Alpha-(1,6)-fucosyltransferase	66.515	14	14	14	31.8	31.8	31.8	0	35.548	416900000	33	25.0881	25.0364
926	FXR1	P51114	Fragile X mental retardation syndrome-related protein 1	69.72	16	16	14	24.8	24.8	22.2	0	47.646	679620000	55	26.9695	26.906
927	FYCO1	Q9BQS8	FYVE and coiled-coil domain-containing protein 1	166.98	1	1	1	0.7	0.7	0.7	0.0029811	1.6519	4194800	1	20.4169	17.7254
928	FYN;YES1	P06241;P07947	Tyrosine-protein kinase Fyn;Tyrosine-protein kinase Yes	60.761	2	2	1	3.4	3.4	1.5	0	3.6435	63028000	3	25.696	19.4909
929	G3BP1	Q13283	Ras GTPase-activating protein-binding protein 1	52.164	9	9	8	28.1	28.1	25.5	0	35.533	234490000	18	23.5554	23.4619
930	G3BP2	Q9UN86	Ras GTPase-activating protein-binding protein 2	54.12	7	6	6	21.8	19.3	19.3	0	99.459	1050700000	32	28.2198	27.9238
931	G6PD	P11413	Glucose-6-phosphate 1-dehydrogenase	59.256	18	18	18	41.4	41.4	41.4	0	77.46	598210000	46	25.9343	25.9349
932	GAB1	Q13480	GRB2-associated-binding protein 1	76.615	2	2	2	4.8	4.8	4.8	0.00037893	2.6312	1935300	1	19.9522	18.133
933	GAK	O14976	Cyclin-G-associated kinase	143.19	5	5	5	4.3	4.3	4.3	0	14.89	68291000	9	23.4838	23.3269
934	GALE	Q14376	UDP-glucose 4-epimerase	38.281	2	2	2	13.2	13.2	13.2	0.00036805	2.4261	8885700	1	17.9214	19.8239
935	GALK1	P51570	Galactokinase	42.272	7	7	7	19.9	19.9	19.9	0	18.969	139680000	19	23.9016	24.9237
936	GALNT1	Q10472	Polypeptide N-acetylgalactosaminyltransferase 1;Polypeptide N-acetylgalactosaminyltransferase 1 soluble form	64.218	4	4	4	10.4	10.4	10.4	0	25.176	53264000	6	22.8401	22.6267
937	GALNT2	Q10471	Polypeptide N-acetylgalactosaminyltransferase 2;Polypeptide N-acetylgalactosaminyltransferase 2 soluble form	64.732	4	4	4	7.7	7.7	7.7	0	8.7177	51852000	6	22.8769	22.9752
938	GAN	Q9H2C0	Gigaxonin	67.638	1	1	1	2.3	2.3	2.3	0	5.8088	13553000	4	22.0884	18.1783
939	GANAB	Q14697	Neutral alpha-glucosidase AB	106.87	25	25	25	35.9	35.9	35.9	0	110.52	723190000	46	26.3598	26.2995
940	GAPDH	P04406;O14556	Glyceraldehyde-3-phosphate dehydrogenase	36.053	15	15	15	67.2	67.2	67.2	0	147.76	1353100000	50	26.444	26.5747
941	GAPVD1	Q14C86	GTPase-activating protein and VPS9 domain-containing protein 1	164.98	6	6	6	4.3	4.3	4.3	0	9.8584	111820000	11	23.8745	23.9594
942	GARS	P41250	Glycine--tRNA ligase	83.165	8	8	8	18.9	18.9	18.9	0	40.477	129680000	10	23.1553	23.1811
943	GART	P22102	Trifunctional purine biosynthetic protein adenosine-3;Phosphoribosylamine--glycine ligase;Phosphoribosylformylglycinamidine cyclo-ligase;Phosphoribosylglycinamide formyltransferase	107.77	21	21	21	28.5	28.5	28.5	0	73.094	1252900000	62	26.7507	26.704
944	GATA6	Q92908	Transcription factor GATA-6	60.032	1	1	1	2.4	2.4	2.4	0	8.7768	10547000	4	20.7089	18.6881
945	GATAD2A	Q86YP4	Transcriptional repressor p66-alpha	68.062	10	10	9	19.7	19.7	18	0	35.837	199710000	21	26.1635	26.258
946	GATAD2B	Q8WXI9	Transcriptional repressor p66-beta	65.26	5	4	4	14.3	12.5	12.5	0	26.37	82830000	5	22.8917	17.099
947	GATD3A	P0DPI2;A0A0B4J2D5;A0A096LPI6	Glutamine amidotransferase-like class 1 domain-containing protein 3A, mitochondrial	28.17	6	6	6	34.7	34.7	34.7	0	36.901	236570000	13	24.8871	24.8233
948	GBF1	Q92538	Golgi-specific brefeldin A-resistance guanine nucleotide exchange factor 1	206.44	7	7	7	5.5	5.5	5.5	0	36.301	68198000	6	22.0184	22.2289
949	GCAT	O75600	2-amino-3-ketobutyrate coenzyme A ligase, mitochondrial	45.285	1	1	1	2.4	2.4	2.4	0.0042167	1.5331	6895900	0	20.2593	19.7472
950	GCFC2	P16383	GC-rich sequence DNA-binding factor 2	89.384	3	3	3	6.4	6.4	6.4	0	9.1558	29810000	5	21.2812	21.1613
951	GCH1	P30793	GTP cyclohydrolase 1	27.903	11	11	11	55.2	55.2	55.2	0	69.209	969430000	35	25.4061	25.2675
952	GCLM	P48507	Glutamate--cysteine ligase regulatory subunit	30.727	5	5	5	30.3	30.3	30.3	0	28.948	99063000	9	23.0523	22.702
953	GCN1L1	Q92616	Translational activator GCN1	292.75	40	40	40	22.1	22.1	22.1	0	216.62	913700000	81	26.7163	26.7949
954	GDAP1	Q8TB36	Ganglioside-induced differentiation-associated protein 1	41.345	3	3	3	10.1	10.1	10.1	0	7.0248	28723000	4	22.3731	22.6683
955	GDI1	P31150	Rab GDP dissociation inhibitor alpha	50.582	2	1	1	6.7	2.5	2.5	0.00037495	2.5713	7600600	2	18.4529	21.7462
956	GDI2	P50395	Rab GDP dissociation inhibitor beta	50.663	4	4	3	13	13	8.8	0	9.7633	58477000	8	22.1744	21.8942
957	GEMIN4	P57678	Gem-associated protein 4	120.04	12	12	12	12.8	12.8	12.8	0	39.745	280510000	29	25.0602	25.1891
958	GEMIN5	Q8TEQ6	Gem-associated protein 5	168.59	22	22	22	20.3	20.3	20.3	0	112.96	595100000	47	25.7532	25.6713
959	GEMIN6	Q8WXD5	Gem-associated protein 6	18.824	2	2	2	13.8	13.8	13.8	0	5.467	49301000	8	23.3087	23.3721
960	GEMIN7	Q9H840	Gem-associated protein 7	14.536	2	2	2	39.7	39.7	39.7	0	14.668	23712000	1	21.1018	18.9071
961	GEMIN8	Q9NWZ8	Gem-associated protein 8	28.636	4	4	4	22.3	22.3	22.3	0	6.0533	67103000	9	23.7282	23.2041
962	GET4	Q7L5D6	Golgi to ER traffic protein 4 homolog	36.504	1	1	1	4	4	4	0	3.9565	12694000	3	20.6889	19.5403
963	GFM1	Q96RP9	Elongation factor G, mitochondrial	83.471	14	14	14	27	27	27	0	36.482	407500000	28	24.5289	24.431
964	GFM2	Q969S9	Ribosome-releasing factor 2, mitochondrial	86.6	2	2	2	3.6	3.6	3.6	0	3.7898	10164000	3	19.313	19.392
965	GFPT1	Q06210	Glutamine--fructose-6-phosphate aminotransferase [isomerizing] 1	78.806	13	13	9	23.9	23.9	16.3	0	38.819	298330000	33	24.8505	24.7672
966	GGA2	Q9UJY4	ADP-ribosylation factor-binding protein GGA2	67.15	1	1	1	2.9	2.9	2.9	0.00072124	2.2714	5118600	1	19.2528	19.1014
967	GHDC	Q8N2G8	GH3 domain-containing protein	57.522	2	2	2	5.1	5.1	5.1	0.003296	1.6095	4976900	1	18.4269	18.9894
968	GHITM	Q9H3K2	Growth hormone-inducible transmembrane protein	37.205	1	1	1	2.9	2.9	2.9	0.00071225	2.1739	7568000	3	19.834	23.0226
969	GID8	Q9NWU2	Glucose-induced degradation protein 8 homolog	26.748	4	4	4	32	32	32	0	13.171	99009000	9	22.6299	22.3182
970	GIGYF2	Q6Y7W6	PERQ amino acid-rich with GYF domain-containing protein 2	150.07	38	38	38	38	38	38	0	323.31	3565400000	156	28.2769	28.0821
971	GIT1	Q9Y2X7	ARF GTPase-activating protein GIT1	84.34	2	2	2	3.9	3.9	3.9	0	8.5903	17086000	1	19.5695	18.2395
972	GIT2	Q14161	ARF GTPase-activating protein GIT2	84.542	1	1	1	1.3	1.3	1.3	0.00037467	2.5646	6316400	2	21.6622	19.8865
973	GLA	P06280	Alpha-galactosidase A	48.766	3	3	3	11.2	11.2	11.2	0	5.3485	19512000	5	19.8225	19.8191
974	GLDC	P23378	Glycine dehydrogenase (decarboxylating), mitochondrial	112.73	5	5	5	6.3	6.3	6.3	0	7.9121	60258000	9	24.0343	23.8915
975	GLG1	Q92896	Golgi apparatus protein 1	134.55	7	7	7	7.3	7.3	7.3	0	17.199	72479000	10	24.1143	24.391
976	GLMN	Q92990	Glomulin	68.207	2	2	2	6.2	6.2	6.2	0	15.423	43260000	4	21.5035	21.3787
977	GLRX3	O76003	Glutaredoxin-3	37.432	8	8	8	21.5	21.5	21.5	0	17.438	197070000	21	24.973	24.9365
978	GLS	O94925	Glutaminase kidney isoform, mitochondrial	73.46	9	9	9	18.8	18.8	18.8	0	51.248	200300000	14	24.6238	24.5419
979	GLTP	Q9NZD2	Glycolipid transfer protein	23.85	2	2	2	12.9	12.9	12.9	0.00038197	2.6988	9529200	1	19.1815	18.7012
980	GLUD1;GLUD2	P00367;P49448	Glutamate dehydrogenase 1, mitochondrial;Glutamate dehydrogenase 2, mitochondrial	61.397	4	4	4	9.5	9.5	9.5	0	5.4768	17132000	4	22.1279	21.9579
981	GLYR1	Q49A26	Putative oxidoreductase GLYR1	60.547	2	2	2	5.4	5.4	5.4	0.00039185	2.9159	10553000	1	19.2359	17.9622
982	GMDS	O60547	GDP-mannose 4,6 dehydratase	41.949	4	4	4	14.5	14.5	14.5	0	7.2156	58934000	7	21.9537	21.6696
983	GMFB	P60983	Glia maturation factor beta	16.713	4	4	4	31	31	31	0	20.194	74277000	12	22.4239	22.7623
984	GMPPA	Q96IJ6	Mannose-1-phosphate guanyltransferase alpha	46.291	4	4	4	12.1	12.1	12.1	0	9.7028	105630000	12	24.3162	23.9847
985	GMPPB	Q9Y5P6	Mannose-1-phosphate guanyltransferase beta	39.834	4	4	4	11.9	11.9	11.9	0	7.3042	113680000	7	23.9753	24.0329
986	GMPR2	Q9P2T1	GMP reductase 2	37.874	2	2	2	10.9	10.9	10.9	0	4.7835	16423000	4	19.569	19.4618
987	GMPS	P49915	GMP synthase [glutamine-hydrolyzing]	76.715	27	27	27	46.5	46.5	46.5	0	174.27	2615800000	96	27.4762	27.1897
988	GNAI3	P08754	Guanine nucleotide-binding protein G(k) subunit alpha	40.532	5	5	4	14.7	14.7	11.6	0	49.323	244030000	16	23.244	23.4482
989	GNAS	Q5JWF2;P63096;P19087;P09471;A8MTJ3;P04899;P38405	Guanine nucleotide-binding protein G(s) subunit alpha isoforms XLas	111.02	5	4	4	5.6	4.5	4.5	0	12.19	69018000	8	23.2216	23.3074
990	GNB1	P62873;P16520	Guanine nucleotide-binding protein G(I)/G(S)/G(T) subunit beta-1	37.377	6	6	3	14.7	14.7	5.3	0	58.018	401460000	20	24.7566	24.67
991	GNB1L	Q9BYB4	Guanine nucleotide-binding protein subunit beta-like protein 1	35.618	2	2	2	6.7	6.7	6.7	0	3.5558	19578000	2	21.009	20.3026
992	GNB2	P62879	Guanine nucleotide-binding protein G(I)/G(S)/G(T) subunit beta-2	37.331	5	2	0	13.5	4.1	0	0	33.083	209020000	12	24.4007	24.2531
993	GNB2L1	P63244	Guanine nucleotide-binding protein subunit beta-2-like 1;Guanine nucleotide-binding protein subunit beta-2-like 1, N-terminally processed	35.076	18	18	18	67.5	67.5	67.5	0	235.06	3017700000	94	27.5171	27.483
994	GNE	Q9Y223	Bifunctional UDP-N-acetylglucosamine 2-epimerase/N-acetylmannosamine kinase;UDP-N-acetylglucosamine 2-epimerase (hydrolyzing);N-acetylmannosamine kinase	79.274	4	4	4	6	6	6	0	7.5789	45692000	9	22.7935	23.0689
995	GNL1	P36915	Guanine nucleotide-binding protein-like 1	68.66	1	1	1	2	2	2	0.00038625	2.7781	30761000	2	20.8971	19.6526
996	GNL2	Q13823	Nucleolar GTP-binding protein 2	83.654	2	2	2	4.2	4.2	4.2	0.00039573	2.9954	21258000	4	23.2826	23.3637
997	GNL3	Q9BVP2	Guanine nucleotide-binding protein-like 3	61.992	11	11	11	26.2	26.2	26.2	0	83.084	312990000	18	24.6464	24.8368
998	GNL3L	Q9NVN8	Guanine nucleotide-binding protein-like 3-like protein	65.572	3	3	3	6.2	6.2	6.2	0	5.364	32365000	5	20.7722	20.929
999	GNPNAT1	Q96EK6	Glucosamine 6-phosphate N-acetyltransferase	20.749	1	1	1	6	6	6	0.0003917	2.9117	83161000	2	22.4274	17.8022
1000	GOLGA3	Q08378	Golgin subfamily A member 3	167.35	2	2	2	1.9	1.9	1.9	0.00040096	3.0729	15344000	1	18.9944	22.4233
1001	GOLGA5	Q8TBA6	Golgin subfamily A member 5	83.023	2	2	2	2.7	2.7	2.7	0.0003861	2.778	4801100	1	21.3349	18.2869
1002	GOLGB1	Q14789	Golgin subfamily B member 1	376.01	3	3	3	1.5	1.5	1.5	0.0010457	2.0169	139900000	2	23.9121	19.3418
1003	GOLIM4	O00461	Golgi integral membrane protein 4	81.879	19	19	19	41.2	41.2	41.2	0	164.01	1126300000	60	27.7481	27.5767
1004	GOLPH3	Q9H4A6;Q9H4A5	Golgi phosphoprotein 3	33.81	4	4	4	22.8	22.8	22.8	0	15.887	64383000	8	22.1323	22.2728
1005	GORASP2	Q9H8Y8	Golgi reassembly-stacking protein 2	47.145	1	1	1	3.8	3.8	3.8	0.0090512	1.2949	13854000	1	20.0273	18.3179
1006	GOSR1	O95249	Golgi SNAP receptor complex member 1	28.612	3	3	3	14.8	14.8	14.8	0	20.203	123630000	13	23.535	23.5585
1007	GPATCH11	Q8N954	G patch domain-containing protein 11	33.277	1	1	1	10.2	10.2	10.2	0	8.2765	8702000	2	20.5619	19.6765
1008	GPATCH4	Q5T3I0	G patch domain-containing protein 4	50.381	9	9	9	24.4	24.4	24.4	0	21.736	120720000	17	24.6089	24.6958
1009	GPATCH8	Q9UKJ3;Q7Z570;A4D1E1	G patch domain-containing protein 8	164.2	3	3	3	3.1	3.1	3.1	0	5.0328	15197000	5	21.7618	22.3377
1010	GPD2	P43304	Glycerol-3-phosphate dehydrogenase, mitochondrial	80.852	1	1	1	1.2	1.2	1.2	0.0013732	1.9191	22796000	1	20.4452	18.7441
1011	GPKOW	Q92917	G patch domain and KOW motifs-containing protein	52.228	16	16	16	47.9	47.9	47.9	0	70.854	838680000	51	26.7938	26.685
1012	GPR180	Q86V85	Integral membrane protein GPR180	49.395	1	1	1	3.4	3.4	3.4	0	5.7236	19191000	4	17.8444	22.7245
1013	GPR89B;GPR89A	P0CG08;B7ZAQ6	Golgi pH regulator B;Golgi pH regulator A	52.916	1	1	1	2.6	2.6	2.6	0.003007	1.7221	7946000	2	19.9464	18.4369
1014	GPRIN1	Q7Z2K8	G protein-regulated inducer of neurite outgrowth 1	102.4	3	3	3	5.1	5.1	5.1	0.0003712	2.4878	7837700	4	20.8321	20.8989
1015	GPS1	Q13098	COP9 signalosome complex subunit 1	55.536	4	4	4	11.4	11.4	11.4	0	10.976	61047000	6	24.1323	24.5527
1016	GPS2	Q13227	G protein pathway suppressor 2	36.688	3	3	3	10.4	10.4	10.4	0	6.9774	505480000	12	26.2773	25.8175
1017	GPSM1	Q86YR5	G-protein-signaling modulator 1	74.509	2	2	2	4.3	4.3	4.3	0.0093458	1.28	10180000	1	17.9185	21.3046
1018	GPT2	Q8TD30	Alanine aminotransferase 2	57.903	1	1	1	1.7	1.7	1.7	0.0045161	1.5123	6304600	2	19.8923	18.8313
1019	GRB2	P62993	Growth factor receptor-bound protein 2	25.206	1	1	1	4.6	4.6	4.6	0.00071327	2.1792	6117200	2	18.4269	21.3092
1020	GRHPR	Q9UBQ7	Glyoxylate reductase/hydroxypyruvate reductase	35.668	7	7	7	30.2	30.2	30.2	0	85.793	346620000	26	24.5761	24.7739
1021	GRK6	P43250	G protein-coupled receptor kinase 6	65.99	2	2	2	5.2	5.2	5.2	0	5.3186	8784900	2	19.7145	20.5408
1022	GRPEL1	Q9HAV7	GrpE protein homolog 1, mitochondrial	24.279	2	2	2	10.1	10.1	10.1	0.00039667	3.0158	15236000	3	20.7419	18.8234
1023	GRPEL2	Q8TAA5	GrpE protein homolog 2, mitochondrial	25.431	1	1	1	4.9	4.9	4.9	0.0010413	1.9923	5288300	1	19.5728	20.3246
1024	GRSF1	Q12849	G-rich sequence factor 1	53.126	14	14	14	37.9	37.9	37.9	0	72.813	592380000	34	26.374	26.4717
1025	GRWD1	Q9BQ67	Glutamate-rich WD repeat-containing protein 1	49.419	10	10	10	38.6	38.6	38.6	0	35.118	382160000	21	24.174	24.1682
1026	GSE1	Q14687	Genetic suppressor element 1	136.16	51	51	51	54.2	54.2	54.2	0	323.31	10005000000	283	29.7559	29.5558
1027	GSK3A	M0QYV0;P49840	Glycogen synthase kinase-3 alpha	19.274	1	1	1	6	6	6	0.002998	1.6877	7822800	2	22.1144	18.8042
1028	GSK3B	P49841	Glycogen synthase kinase-3 beta	46.744	3	3	3	11.9	11.9	11.9	0	14.613	839350000	7	24.5197	24.6537
1029	GSPT1	P15170	Eukaryotic peptide chain release factor GTP-binding subunit ERF3A	55.755	11	11	6	25.5	25.5	15.8	0	25.776	315190000	21	25.0353	24.8829
1030	GSPT2	Q8IYD1	Eukaryotic peptide chain release factor GTP-binding subunit ERF3B	68.882	6	1	1	10.4	2.7	2.7	0	4.1922	141210000	1	24.1477	18.2656
1031	GSTCD	Q8NEC7	Glutathione S-transferase C-terminal domain-containing protein	71.078	1	1	1	2.8	2.8	2.8	0	3.5113	13718000	3	20.2696	17.9502
1032	GSTK1	Q9Y2Q3	Glutathione S-transferase kappa 1	25.497	5	5	5	35	35	35	0	19.201	169740000	18	23.3597	23.7533
1033	GSTM3	P21266	Glutathione S-transferase Mu 3	26.559	3	3	3	18.2	18.2	18.2	0	23.064	89097000	7	22.3658	22.4794
1034	GSTO1	P78417	Glutathione S-transferase omega-1	27.566	13	13	13	45.2	45.2	45.2	0	26.519	563310000	47	25.7553	25.7182
1035	GTF2B	Q00403	Transcription initiation factor IIB	34.833	4	4	4	15.2	15.2	15.2	0	9.3119	36780000	6	21.9892	22.0245
1036	GTF2H2C;GTF2H2	Q6P1K8;Q13888	General transcription factor IIH subunit 2-like protein;General transcription factor IIH subunit 2	44.452	1	1	1	6.1	6.1	6.1	0.00036337	2.3339	10568000	2	19.4993	19.5444
1037	GTF2H4	Q92759	General transcription factor IIH subunit 4	52.186	1	1	1	4.1	4.1	4.1	0	3.9223	3344300	1	18.7477	20.1661
1038	GTF2I	P78347;Q86UP8;Q6EKJ0	General transcription factor II-I	112.42	30	30	30	41.5	41.5	41.5	0	254.73	1390300000	105	26.9342	26.8817
1039	GTF3C1	Q12789	General transcription factor 3C polypeptide 1	238.87	16	16	16	10	10	10	0	46.86	255950000	23	26.0799	26.0496
1040	GTF3C2	Q8WUA4	General transcription factor 3C polypeptide 2	100.68	1	1	1	1.3	1.3	1.3	0.0010508	2.0558	9273700	1	19.1619	21.2308
1041	GTF3C3	Q9Y5Q9	General transcription factor 3C polypeptide 3	101.27	8	8	8	13.2	13.2	13.2	0	14.182	85614000	10	22.3975	22.3537
1042	GTF3C4	Q9UKN8	General transcription factor 3C polypeptide 4	91.981	9	9	9	18.4	18.4	18.4	0	15.965	88011000	11	23.2894	23.3287
1043	GTF3C5	Q9Y5Q8	General transcription factor 3C polypeptide 5	59.57	8	8	8	19.1	19.1	19.1	0	9.1455	101690000	4	21.5927	22.726
1044	GTPBP1	O00178	GTP-binding protein 1	72.453	3	3	3	7.5	7.5	7.5	0	11.092	29635000	5	20.3799	20.1163
1045	GTPBP3	Q969Y2	tRNA modification GTPase GTPBP3, mitochondrial	52.058	4	4	4	10.2	10.2	10.2	0	12.031	39827000	7	23.3272	23.4264
1046	GTPBP4	Q9BZE4	Nucleolar GTP-binding protein 1	73.964	10	10	10	18.8	18.8	18.8	0	40.312	211390000	15	25.1917	25.1768
1047	GTPBP6	O43824	Putative GTP-binding protein 6	56.897	4	4	4	7.8	7.8	7.8	0	5.9319	66628000	10	24.1508	24.0086
1048	GUF1	Q8N442	Translation factor GUF1, mitochondrial	74.327	2	2	2	4.2	4.2	4.2	0.0042304	1.5496	19936000	2	19.3033	22.7492
1049	GYS1	P13807;P54840	Glycogen [starch] synthase, muscle	83.785	9	9	9	18.9	18.9	18.9	0	18.227	284250000	14	24.5062	24.3106
1050	H1FX	Q92522	Histone H1x	22.487	1	1	1	5.6	5.6	5.6	0.00036765	2.4187	3978700	2	18.903	18.0174
1051	H2AFV;H2AFZ	Q71UI9;P0C0S5	Histone H2A.V;Histone H2A.Z	13.509	5	3	3	53.9	41.4	41.4	0	69.838	599780000	14	25.3784	25.321
1052	H3F3A	P84243	Histone H3.3	15.328	4	1	1	36.8	23.5	23.5	0	29.655	164360000	6	22.8268	23.5042
1053	HACD2	Q6Y1H2	Very-long-chain (3R)-3-hydroxyacyl-CoA dehydratase 2	28.368	1	1	1	3.9	3.9	3.9	0.0090653	1.3068	10076000	2	20.0004	18.7439
1054	HACD3	Q9P035	Very-long-chain (3R)-3-hydroxyacyl-CoA dehydratase 3	43.159	5	5	5	20.7	20.7	20.7	0	36.355	296180000	17	23.7353	23.7794
1055	HADH	Q16836	Hydroxyacyl-coenzyme A dehydrogenase, mitochondrial	34.293	7	7	7	43.6	43.6	43.6	0	125.56	703200000	22	26.2233	26.2588
1056	HADHA	P40939	Trifunctional enzyme subunit alpha, mitochondrial;Long-chain enoyl-CoA hydratase;Long chain 3-hydroxyacyl-CoA dehydrogenase	82.999	23	23	23	42.3	42.3	42.3	0	147.59	1641900000	69	26.9908	27.0272
1057	HADHB	P55084	Trifunctional enzyme subunit beta, mitochondrial;3-ketoacyl-CoA thiolase	51.294	18	18	18	42.4	42.4	42.4	0	84.553	1819100000	60	26.8733	26.7128
1058	HARS;HARS2	P12081;P49590	Histidine--tRNA ligase, cytoplasmic;Probable histidine--tRNA ligase, mitochondrial	57.41	2	2	2	4.3	4.3	4.3	0.0004042	3.1192	6989400	1	21.74	18.8409
1059	HAT1	O14929	Histone acetyltransferase type B catalytic subunit	49.512	6	6	6	21.2	21.2	21.2	0	37.274	296590000	11	23.8648	23.9692
1060	HAUS1	Q96CS2	HAUS augmin-like complex subunit 1	31.863	2	2	2	9.4	9.4	9.4	0	3.3249	17192000	1	20.2287	20.9673
1061	HAUS2	Q9NVX0	HAUS augmin-like complex subunit 2	26.933	1	1	1	7.2	7.2	7.2	0	4.6398	20610000	4	19.5741	19.5099
1062	HAUS3	Q68CZ6	HAUS augmin-like complex subunit 3	69.65	2	2	2	5.6	5.6	5.6	0.0096243	1.2637	1999400	2	18.0056	20.4969
1063	HAUS5	O94927	HAUS augmin-like complex subunit 5	71.682	4	4	4	7.4	7.4	7.4	0	10.407	35016000	4	22.8851	23.2284
1064	HAUS6	Q7Z4H7	HAUS augmin-like complex subunit 6	108.62	10	10	10	17.5	17.5	17.5	0	52.897	117490000	15	23.3629	23.5042
1065	HAUS8	Q9BT25	HAUS augmin-like complex subunit 8	44.857	1	1	1	5.4	5.4	5.4	0	6.5643	10275000	2	18.313	19.2657
1066	HAX1	O00165	HCLS1-associated protein X-1	31.62	8	8	8	35.1	35.1	35.1	0	17.599	145250000	13	25.1101	25.2427
1067	HBS1L	Q9Y450	HBS1-like protein	75.472	17	17	17	38.2	38.2	38.2	0	61.813	523380000	43	25.536	25.6259
1068	hCG_1984214;MRPS17	I3L0E3;Q9Y2R5	28S ribosomal protein S17, mitochondrial	25.72	3	3	3	12.9	12.9	12.9	0	4.8292	67951000	6	21.9298	21.767
1069	HDAC1	Q13547	Histone deacetylase 1	55.102	19	11	11	58.1	39.4	39.4	0	117.8	1201600000	42	25.548	25.5426
1070	HDAC2	Q92769	Histone deacetylase 2	55.364	20	20	12	53.1	53.1	34.6	0	323.31	7015100000	156	28.5414	28.2861
1071	HDAC3	O15379	Histone deacetylase 3	48.847	8	8	8	28	28	28	0	39.88	146330000	10	22.5024	22.6689
1072	HDDC2	Q7Z4H3	HD domain-containing protein 2	23.39	6	6	6	37.7	37.7	37.7	0	40.789	358060000	31	25.0372	25.1492
1073	HDLBP	Q00341	Vigilin	141.45	15	15	15	14.4	14.4	14.4	0	39.37	204420000	26	24.7267	24.5011
1074	HEATR1	Q9H583	HEAT repeat-containing protein 1;HEAT repeat-containing protein 1, N-terminally processed	242.37	6	6	6	4.9	4.9	4.9	0	11.003	86676000	8	23.0654	23.1157
1075	HEATR3	Q7Z4Q2	HEAT repeat-containing protein 3	74.582	6	6	6	11.6	11.6	11.6	0	21.666	91237000	11	22.3644	22.4512
1076	HEATR5B	Q9P2D3	HEAT repeat-containing protein 5B	224.3	2	2	2	1.8	1.8	1.8	0	3.3945	17428000	2	20.0575	19.9298
1077	HECA	Q9UBI9	Headcase protein homolog	58.836	2	2	2	4.8	4.8	4.8	0	8.4069	11380000	4	22.4109	18.1132
1078	HECTD1	Q9ULT8	E3 ubiquitin-protein ligase HECTD1	289.38	16	16	16	8.5	8.5	8.5	0	70.831	161930000	27	24.5554	24.5096
1079	HECTD3	Q5T447	E3 ubiquitin-protein ligase HECTD3	97.112	2	2	2	3.9	3.9	3.9	0	4.0767	33133000	2	21.2318	20.7213
1080	HECTD4	Q9Y4D8	Probable E3 ubiquitin-protein ligase HECTD4	439.34	1	1	1	0.5	0.5	0.5	0.00070947	2.1405	8177100	3	22.2955	21.7025
1081	HELLS	Q9NRZ9	Lymphoid-specific helicase	97.073	21	21	21	23	23	23	0	71.648	728170000	61	27.1182	27.1485
1082	HELZ	P42694	Probable helicase with zinc finger domain	218.97	6	6	6	5.1	5.1	5.1	0	21.422	77993000	10	22.8169	22.7729
1083	HERC2	O95714;Q9BVR0	E3 ubiquitin-protein ligase HERC2	527.22	7	7	7	2	2	2	0	16.369	94746000	13	23.5247	23.301
1084	HGH1	Q9BTY7	Protein HGH1 homolog	42.129	5	5	5	22.8	22.8	22.8	0	20.374	112780000	8	22.9552	23.2584
1085	HGS	O14964	Hepatocyte growth factor-regulated tyrosine kinase substrate	86.191	4	4	4	5.3	5.3	5.3	0	8.7628	51210000	6	23.2607	23.0635
1086	HIBADH	P31937	3-hydroxyisobutyrate dehydrogenase, mitochondrial	35.329	2	2	2	8.6	8.6	8.6	0	11.937	54552000	4	21.6913	21.4966
1087	HIBCH	Q6NVY1	3-hydroxyisobutyryl-CoA hydrolase, mitochondrial	43.482	7	7	7	19.4	19.4	19.4	0	11.628	193190000	12	23.6735	23.9129
1088	HIGD1A	C9JAW5;Q9Y241;A8MV81	HIG1 domain family member 1A, mitochondrial	8.8131	4	4	4	61.4	61.4	61.4	0	28.826	187650000	10	23.7468	23.5835
1089	HIGD2A	Q9BW72	HIG1 domain family member 2A, mitochondrial	11.528	2	2	2	47.2	47.2	47.2	0	7.1521	151430000	3	21.8057	23.5406
1090	HINT3	Q9NQE9	Histidine triad nucleotide-binding protein 3	20.361	2	2	2	15.9	15.9	15.9	0	3.548	29867000	3	20.532	19.8307
1091	HIST1H1C;HIST1H1E;HIST1H1D	P16403;P10412;P16402;P22492;Q02539	Histone H1.2;Histone H1.4;Histone H1.3	21.364	9	9	9	27.7	27.7	27.7	0	22.163	883580000	49	27.1858	27.2415
1092	HIST1H2AJ;HIST1H2AH;H2AFJ;HIST1H2AD;HIST1H2AG;HIST1H2AC;HIST3H2A;HIST1H2AB	A0A0U1RRH7;Q99878;Q96KK5;Q9BTM1;P20671;P0C0S8;Q93077;Q7L7L0;P04908	Histone H2A type 1-J;Histone H2A type 1-H;Histone H2A.J;Histone H2A type 1-D;Histone H2A type 1;Histone H2A type 1-C;Histone H2A type 3;Histone H2A type 1-B/E	18.552	6	6	0	44.1	44.1	0	0	102.03	1813800000	28	26.4198	26.7158
1093	HIST1H2BL;HIST1H2BM;HIST1H2BN;HIST1H2BH;HIST2H2BF;HIST1H2BC;HIST1H2BD;H2BFS;HIST1H2BK;HIST1H2BA	Q99880;Q99879;Q99877;Q93079;Q5QNW6;P62807;P58876;P57053;O60814;Q96A08;A0A2R8Y619	Histone H2B type 1-L;Histone H2B type 1-M;Histone H2B type 1-N;Histone H2B type 1-H;Histone H2B type 2-F;Histone H2B type 1-C/E/F/G/I;Histone H2B type 1-D;Histone H2B type F-S;Histone H2B type 1-K;Histone H2B type 1-A	13.952	6	6	2	41.3	41.3	7.9	0	32.772	2358500000	35	26.5276	27.1344
1094	HIST1H3A;HIST3H3	P68431;Q16695;Q6NXT2	Histone H3.1;Histone H3.1t	15.404	4	1	1	36.8	23.5	23.5	0	22.011	391150000	6	24.0726	24.8117
1095	HIST1H4A	P62805	Histone H4	11.367	12	12	12	64.1	64.1	64.1	0	39.925	4766800000	72	27.9692	28.2996
1096	HIST2H2AC;HIST2H2AA3	Q16777;Q6FI13	Histone H2A type 2-C;Histone H2A type 2-A	13.988	6	1	1	58.1	22.5	22.5	0	28.875	721820000	3	25.2117	25.7458
1097	HIST2H2BE;HIST1H2BB;HIST1H2BO;HIST1H2BJ;HIST3H2BB	Q16778;P33778;P23527;P06899;Q8N257;Q6DRA6;Q6DN03	Histone H2B type 2-E;Histone H2B type 1-B;Histone H2B type 1-O;Histone H2B type 1-J;Histone H2B type 3-B	13.92	6	2	2	41.3	7.9	7.9	0.00038462	2.7559	87414000	4	18.9131	21.5586
1098	HIST2H3A	Q71DI3	Histone H3.2	15.388	4	4	1	36.8	36.8	23.5	0	57.471	941330000	39	26.2953	26.5207
1099	HIST2H3PS2	Q5TEC6	Histone H3	15.43	2	1	1	13.2	8.1	8.1	0.0013798	1.9535	204400000	7	23.0521	24.5882
1100	HK1	P19367;Q2TB90;P52790	Hexokinase-1	102.48	22	22	19	22.4	22.4	19.5	0	61.238	709290000	58	26.2413	26.3417
1101	HK2	P52789	Hexokinase-2	102.38	12	9	9	11.2	8.4	8.4	0	20.261	251700000	24	26.2382	26.2371
1102	HLA-A	P01891;P01893;P30511	HLA class I histocompatibility antigen, A-68 alpha chain	40.908	5	5	4	17.8	17.8	11.2	0	39.817	106930000	8	23.8603	23.6267
1103	HLA-C	Q95604	HLA class I histocompatibility antigen, Cw-17 alpha chain	41.238	2	1	1	9.4	3	3	0.0010523	2.0697	18213000	4	20.3076	17.9822
1104	HLTF	Q14527	Helicase-like transcription factor	113.93	21	21	21	27.7	27.7	27.7	0	99.971	442740000	44	25.6693	25.5434
1105	HM13	Q8TCT9	Minor histocompatibility antigen H13	41.488	3	3	3	11.4	11.4	11.4	0	14.638	65106000	4	23.6585	23.8427
1106	HMBS	P08397	Porphobilinogen deaminase	39.33	3	3	3	9.7	9.7	9.7	0	6.4473	53283000	6	23.5599	23.5339
1107	HMCES	Q96FZ2	Embryonic stem cell-specific 5-hydroxymethylcytosine-binding protein	40.574	5	5	5	19.8	19.8	19.8	0	9.8975	74390000	9	22.8101	22.9127
1108	HMG20A	Q9NP66	High mobility group protein 20A	40.143	15	15	15	45.8	45.8	45.8	0	119.33	2816800000	81	28.0255	27.8
1109	HMG20B	Q9P0W2	SWI/SNF-related matrix-associated actin-dependent regulator of chromatin subfamily E member 1-related	35.812	13	13	13	42.6	42.6	42.6	0	72.162	845510000	56	26.7627	26.2544
1110	HMGCL	P35914	Hydroxymethylglutaryl-CoA lyase, mitochondrial	34.36	2	2	2	8.9	8.9	8.9	0	15.462	52017000	2	21.4349	21.4091
1111	HMGCS1	Q01581;P54868	Hydroxymethylglutaryl-CoA synthase, cytoplasmic	57.293	7	7	7	25.6	25.6	25.6	0	71.272	119530000	8	23.4085	23.3807
1112	HMOX1	P09601	Heme oxygenase 1	32.818	2	2	2	9.7	9.7	9.7	0	6.0793	28410000	5	22.1384	22.9255
1113	HMOX2	P30519	Heme oxygenase 2	36.032	4	4	4	18	18	18	0	61.91	62330000	6	23.6847	24.0601
1114	HNRNPA0	Q13151	Heterogeneous nuclear ribonucleoprotein A0	30.84	9	9	9	28.9	28.9	28.9	0	126.11	930900000	38	25.7917	26.057
1115	HNRNPA1;HNRNPA1L2	P09651;Q32P51;A0A2R8Y4L2	Heterogeneous nuclear ribonucleoprotein A1;Heterogeneous nuclear ribonucleoprotein A1, N-terminally processed;Heterogeneous nuclear ribonucleoprotein A1-like 2	38.746	9	9	9	30.4	30.4	30.4	0	19.16	283780000	24	25.3021	25.2097
1116	HNRNPA2B1	P22626	Heterogeneous nuclear ribonucleoproteins A2/B1	37.429	5	5	5	15.9	15.9	15.9	0	12.393	108040000	7	22.8743	22.7394
1117	HNRNPA3	P51991	Heterogeneous nuclear ribonucleoprotein A3	39.594	14	14	14	37.6	37.6	37.6	0	74.815	635360000	50	26.6213	26.6794
1118	HNRNPAB	Q99729	Heterogeneous nuclear ribonucleoprotein A/B	36.224	7	7	7	21.1	21.1	21.1	0	34.412	210800000	15	23.8014	23.9822
1119	HNRNPC;HNRNPCL4;HNRNPCL1;HNRNPCL3;HNRNPCL2	P07910;A0A0G2JPF8;A0A0G2JNQ3;P0DMR1;O60812;B7ZW38;B2RXH8	Heterogeneous nuclear ribonucleoproteins C1/C2;Heterogeneous nuclear ribonucleoprotein C-like 4;Heterogeneous nuclear ribonucleoprotein C-like 1;Heterogeneous nuclear ribonucleoprotein C-like 3;Heterogeneous nuclear ribonucleoprotein C-like 2	33.67	14	14	14	37.6	37.6	37.6	0	52.267	1101800000	57	27.0166	27.1024
1120	HNRNPD	Q14103	Heterogeneous nuclear ribonucleoprotein D0	38.434	14	14	12	34.6	34.6	31.8	0	191.34	4253600000	91	29.3187	29.2677
1121	HNRNPDL	O14979	Heterogeneous nuclear ribonucleoprotein D-like	46.437	8	6	6	18.6	16.2	16.2	0	74.544	1508500000	55	26.3045	26.2895
1122	HNRNPF	P52597	Heterogeneous nuclear ribonucleoprotein F;Heterogeneous nuclear ribonucleoprotein F, N-terminally processed	45.671	13	11	11	48.4	41.9	41.9	0	323.31	2384500000	73	26.6576	26.798
1123	HNRNPH1	P31943	Heterogeneous nuclear ribonucleoprotein H;Heterogeneous nuclear ribonucleoprotein H, N-terminally processed	49.229	18	18	12	56.1	56.1	37.2	0	323.31	6979500000	123	29.1746	29.0609
1124	HNRNPH2	P55795	Heterogeneous nuclear ribonucleoprotein H2	49.263	11	6	6	37.9	22.7	22.7	0	43.972	401860000	29	25.0819	24.905
1125	HNRNPH3	P31942	Heterogeneous nuclear ribonucleoprotein H3	36.926	2	2	2	11.6	11.6	11.6	0	6.068	56058000	4	22.5507	19.7713
1126	HNRNPK	P61978	Heterogeneous nuclear ribonucleoprotein K	50.976	28	28	28	55.5	55.5	55.5	0	323.31	16517000000	292	31.1377	31.0735
1127	HNRNPL	P14866;M0QYT0	Heterogeneous nuclear ribonucleoprotein L	64.132	19	19	19	44.3	44.3	44.3	0	323.31	6109800000	103	28.774	28.8551
1128	HNRNPLL	Q8WVV9	Heterogeneous nuclear ribonucleoprotein L-like	60.082	7	7	7	13.5	13.5	13.5	0	22.582	141600000	13	24.827	24.828
1129	HNRNPM	P52272	Heterogeneous nuclear ribonucleoprotein M	77.515	31	31	31	51.6	51.6	51.6	0	221.53	3363400000	135	28.1544	28.182
1130	HNRNPR	O43390	Heterogeneous nuclear ribonucleoprotein R	70.942	7	4	4	12.2	7.7	7.7	0	6.9118	67228000	7	22.3906	22.5953
1131	HNRNPU	Q00839	Heterogeneous nuclear ribonucleoprotein U	90.583	25	25	25	34.3	34.3	34.3	0	323.31	3644500000	94	27.9622	27.9786
1132	HNRNPUL1	Q9BUJ2	Heterogeneous nuclear ribonucleoprotein U-like protein 1	95.737	17	17	17	25.8	25.8	25.8	0	126.38	1212300000	71	26.7933	26.8328
1133	HNRNPUL2-BSCL2;HNRNPUL2	H3BQZ7;Q1KMD3	Heterogeneous nuclear ribonucleoprotein U-like protein 2	84.69	3	3	3	4.4	4.4	4.4	0	3.7635	10921000	5	22.9485	19.0829
1134	HOOK1	Q9UJC3	Protein Hook homolog 1	84.647	3	3	3	5.2	5.2	5.2	0	6.136	129070000	4	25.6716	25.7778
1135	HOXA5	P20719	Homeobox protein Hox-A5	29.345	1	1	1	7.8	7.8	7.8	0	4.8055	10570000	2	20.5325	18.8506
1136	HOXB9	P17482	Homeobox protein Hox-B9	28.058	1	1	1	6	6	6	0.00037594	2.5815	3373900	1	19.7505	18.9776
1137	HPRT1	P00492	Hypoxanthine-guanine phosphoribosyltransferase	24.579	8	8	8	44.5	44.5	44.5	0	35.509	753620000	30	25.2546	25.302
1138	HPX	P02790	Hemopexin	51.676	1	1	1	2.4	2.4	2.4	0.00038491	2.7654	8203100	1	18.8478	17.0788
1139	HRG	P04196	Histidine-rich glycoprotein	59.578	2	2	2	3	3	3	0.00039604	2.9973	31303000	3	22.2166	21.6399
1140	HS2ST1	Q7LGA3	Heparan sulfate 2-O-sulfotransferase 1	41.881	6	6	6	25.6	25.6	25.6	0	48.214	197380000	20	23.8207	23.6363
1141	HSD17B12	Q53GQ0	Very-long-chain 3-oxoacyl-CoA reductase	34.324	6	6	6	28.5	28.5	28.5	0	14.116	132600000	10	24.2814	24.2078
1142	HSD17B4	P51659	Peroxisomal multifunctional enzyme type 2;(3R)-hydroxyacyl-CoA dehydrogenase;Enoyl-CoA hydratase 2	79.685	14	14	14	27	27	27	0	45.413	538090000	39	26.0107	25.9842
1143	HSDL1	Q3SXM5	Inactive hydroxysteroid dehydrogenase-like protein 1	37.001	3	3	3	14.5	14.5	14.5	0	5.5346	18716000	5	19.8903	20.1116
1144	HSDL2	Q6YN16	Hydroxysteroid dehydrogenase-like protein 2	45.394	8	8	8	26.3	26.3	26.3	0	18.019	272980000	18	25.7838	25.6634
1145	HSP90AA1	P07900;Q14568;Q58FG0;Q58FG1	Heat shock protein HSP 90-alpha	84.659	46	26	26	56.7	35	35	0	255.7	4205900000	129	28.0738	28.1428
1146	HSP90AB1	P08238;Q58FF7;Q58FF6	Heat shock protein HSP 90-beta	83.263	53	53	27	63.4	63.4	39.8	0	323.31	20620000000	400	31.2764	31.2707
1147	HSP90AB2P	Q58FF8	Putative heat shock protein HSP 90-beta 2	44.348	13	2	2	23.6	4.5	4.5	0	44	546170000	15	25.027	24.9204
1148	HSP90B1	P14625;Q58FF3	Endoplasmin	92.468	20	18	18	29.3	27.5	27.5	0	61.366	671500000	42	25.6743	25.5162
1149	HSPA14	Q0VDF9	Heat shock 70 kDa protein 14	54.794	4	4	4	12	12	12	0	8.8333	56156000	6	22.9518	23.1473
1150	HSPA1A;HSPA1B	P0DMV8;P0DMV9;P34931	Heat shock 70 kDa protein 1A;Heat shock 70 kDa protein 1B	70.051	15	14	11	33.9	31.8	25	0	45.8	708510000	35	26.5143	26.1787
1151	HSPA4	P34932	Heat shock 70 kDa protein 4	94.33	9	8	8	16.5	15.5	15.5	0	38.374	116220000	12	24.1754	23.9892
1152	HSPA5	P11021	78 kDa glucose-regulated protein	72.332	30	30	30	49.2	49.2	49.2	0	132.34	1685900000	84	26.7024	26.5532
1153	HSPA6;HSPA7	P17066;P48741	Heat shock 70 kDa protein 6;Putative heat shock 70 kDa protein 7	71.027	6	1	1	12	1.7	1.7	0	12.456	512670000	8	27.6676	18.6292
1154	HSPA8	P11142;P54652	Heat shock cognate 71 kDa protein	70.897	23	23	21	45.4	45.4	42	0	109.57	1876100000	75	27.1306	27.001
1155	HSPA9	P38646	Stress-70 protein, mitochondrial	73.68	26	26	26	54.8	54.8	54.8	0	120.58	1117200000	74	26.5635	26.5206
1156	HSPB1	P04792	Heat shock protein beta-1	22.782	3	3	3	21.5	21.5	21.5	0	11.135	67254000	6	23.5426	23.6007
1157	HSPB11	Q9Y547	Intraflagellar transport protein 25 homolog	16.297	2	2	2	25.7	25.7	25.7	0.00039809	3.0378	15392000	1	20.2042	18.7713
1158	HSPBP1	Q9NZL4	Hsp70-binding protein 1	39.302	1	1	1	2.8	2.8	2.8	0.0051004	1.4252	10138000	1	22.6502	18.8492
1159	HSPD1	P10809	60 kDa heat shock protein, mitochondrial	61.054	34	34	34	66.3	66.3	66.3	0	323.31	6704600000	177	29.3091	29.2686
1160	HSPH1	Q92598;O95757	Heat shock protein 105 kDa	96.864	19	19	18	26.1	26.1	25.1	0	67.782	768170000	59	26.6103	26.5888
1161	HTATIP2	Q9BUP3	Oxidoreductase HTATIP2	27.049	2	2	2	8.3	8.3	8.3	0.0003962	3.0011	15139000	3	21.905	18.3573
1162	HTATSF1	O43719	HIV Tat-specific factor 1	85.852	15	15	15	27.5	27.5	27.5	0	127.74	551560000	44	27.1273	27.1594
1163	HTRA2	O43464	Serine protease HTRA2, mitochondrial	48.84	2	2	2	9.4	9.4	9.4	0	21.63	22387000	3	21.5147	19.3242
1164	HTT	P42858	Huntingtin	347.6	3	3	3	1.6	1.6	1.6	0	6.8508	21167000	3	22.6095	22.2514
1165	HUWE1	Q7Z6Z7	E3 ubiquitin-protein ligase HUWE1	481.89	24	24	24	10.7	10.7	10.7	0	132.58	320380000	39	25.0006	24.963
1166	IARS	P41252	Isoleucine--tRNA ligase, cytoplasmic	144.5	48	48	48	42.2	42.2	42.2	0	323.31	5414600000	186	28.4566	28.5544
1167	IARS2	Q9NSE4	Isoleucine--tRNA ligase, mitochondrial	113.79	18	18	18	20.5	20.5	20.5	0	45.163	579340000	59	25.7758	25.8891
1168	ICT1	Q14197	Peptidyl-tRNA hydrolase ICT1, mitochondrial	23.63	2	2	2	10.7	10.7	10.7	0.00036887	2.4389	14980000	1	22.6241	18.468
1169	IDE	P14735	Insulin-degrading enzyme	117.97	3	3	3	4.3	4.3	4.3	0	3.7619	17020000	4	20.861	20.7662
1170	IDH1	O75874	Isocitrate dehydrogenase [NADP] cytoplasmic	46.659	5	4	4	15.5	13.3	13.3	0	13.458	103370000	16	24.0403	23.8924
1171	IDH2	P48735	Isocitrate dehydrogenase [NADP], mitochondrial	50.909	10	10	9	28.5	28.5	26.5	0	26.342	538750000	30	26.2465	26.1815
1172	IDH3A	P50213	Isocitrate dehydrogenase [NAD] subunit alpha, mitochondrial	39.591	9	9	9	29	29	29	0	67.1	536960000	28	25.1013	24.8163
1173	IDH3B	O43837	Isocitrate dehydrogenase [NAD] subunit beta, mitochondrial	42.183	9	9	9	28.8	28.8	28.8	0	33.879	264110000	19	25.3103	25.5589
1174	IDH3G	P51553	Isocitrate dehydrogenase [NAD] subunit gamma, mitochondrial	42.794	4	4	4	18.3	18.3	18.3	0	75.196	151350000	8	23.5087	23.1554
1175	IDI1	Q13907	Isopentenyl-diphosphate Delta-isomerase 1	26.319	5	5	5	25.1	25.1	25.1	0	12.264	193660000	12	23.3691	23.4817
1176	IFIT5	Q13325	Interferon-induced protein with tetratricopeptide repeats 5	55.846	1	1	1	3.7	3.7	3.7	0	4.4308	18111000	1	19.025	20.9769
1177	IFRD1	O00458	Interferon-related developmental regulator 1	50.268	2	2	2	9.5	9.5	9.5	0	5.1661	30451000	5	21.2413	21.5661
1178	IFT172	Q9UG01	Intraflagellar transport protein 172 homolog	197.57	4	4	4	3.8	3.8	3.8	0	7.2902	24959000	4	19.2182	19.7819
1179	IFT52	Q9Y366	Intraflagellar transport protein 52 homolog	49.706	1	1	1	2.5	2.5	2.5	0.0013841	1.9755	5883500	2	19.6253	20.0886
1180	IFT74	Q96LB3	Intraflagellar transport protein 74 homolog	69.239	5	5	5	9.5	9.5	9.5	0	12.634	45128000	10	23.5716	23.2718
1181	IFT81	Q8WYA0	Intraflagellar transport protein 81 homolog	79.745	2	2	2	4.4	4.4	4.4	0.0078815	1.3408	7181900	1	17.9475	19.1571
1182	IGF2BP1	Q9NZI8;REV__Q15833;Q15517	Insulin-like growth factor 2 mRNA-binding protein 1	63.48	23	23	21	40	40	36	0	205.95	3274500000	106	28.9436	28.9217
1183	IGF2BP2	Q9Y6M1	Insulin-like growth factor 2 mRNA-binding protein 2	66.121	12	10	10	23.5	19.7	19.7	0	38.829	234620000	21	26.1429	25.9364
1184	IGF2BP3	O00425	Insulin-like growth factor 2 mRNA-binding protein 3	63.704	15	13	12	29	25	24	0	106.77	457610000	27	26.1442	25.8089
1185	IGF2R	P11717	Cation-independent mannose-6-phosphate receptor	274.37	9	9	9	5	5	5	0	19.925	99862000	13	24.03	23.9695
1186	IGHG1	P01857;P01859;P01861	Ig gamma-1 chain C region	36.105	6	6	2	14.8	14.8	9.1	0	10.966	218650000000	871	35.866	35.8158
1187	IGKV4-1	P06312	Ig kappa chain V-IV region	13.38	1	1	1	12.4	12.4	12.4	0.00040048	3.0655	610920000	14	25.2028	24.9908
1188	IK	Q13123	Protein Red	65.601	13	13	13	35.7	35.7	35.7	0	88.851	441360000	30	26.9497	26.965
1189	IKBIP	Q70UQ0	Inhibitor of nuclear factor kappa-B kinase-interacting protein	39.309	9	9	9	26.6	26.6	26.6	0	58.154	229270000	21	24.2369	24.1134
1190	IKBKAP	O95163	Elongator complex protein 1	150.25	18	18	18	20.2	20.2	20.2	0	72.466	596350000	42	25.0726	25.3336
1191	ILF2	Q12905	Interleukin enhancer-binding factor 2	43.062	17	17	17	65.1	65.1	65.1	0	76.782	1688600000	67	26.1592	26.2599
1192	ILF3	Q12906	Interleukin enhancer-binding factor 3	95.337	32	32	28	47	47	43.8	0	323.31	4797900000	184	28.7057	28.7229
1193	ILK	Q13418	Integrin-linked protein kinase	51.419	9	9	9	22.8	22.8	22.8	0	22.851	199580000	22	24.3551	24.3001
1194	ILKAP	Q9H0C8	Integrin-linked kinase-associated serine/threonine phosphatase 2C	42.906	7	7	7	18.6	18.6	18.6	0	16.852	101570000	8	23.9242	23.6527
1195	ILVBL	A1L0T0	Acetolactate synthase-like protein	67.867	3	3	3	8.1	8.1	8.1	0	3.8481	27267000	4	20.7532	18.9375
1196	IMMT	Q16891	MICOS complex subunit MIC60	83.677	12	12	12	21.1	21.1	21.1	0	28.416	311440000	26	25.2017	25.5637
1197	INF2	Q27J81	Inverted formin-2	135.62	5	5	5	6.8	6.8	6.8	0	17.382	38006000	9	22.1951	22.0426
1198	INO80	Q9ULG1	DNA helicase INO80	176.75	1	1	1	0.8	0.8	0.8	0.0013727	1.9082	1806800	1	18.3784	18.5473
1199	INPP4A	Q96PE3	Type I inositol 3,4-bisphosphate 4-phosphatase	109.95	1	1	1	1.6	1.6	1.6	0.00037566	2.5762	16041000	0	19.7576	18.3835
1200	INPP5B	P32019	Type II inositol 1,4,5-trisphosphate 5-phosphatase	112.85	2	2	2	2.7	2.7	2.7	0	4.6552	9390400	2	17.7101	22.4334
1201	INPP5F	Q9Y2H2	Phosphatidylinositide phosphatase SAC2	128.41	8	8	8	10.2	10.2	10.2	0	15.849	245770000	13	23.2501	23.1038
1202	INPPL1	O15357	Phosphatidylinositol 3,4,5-trisphosphate 5-phosphatase 2	138.6	7	7	7	8	8	8	0	22.372	100540000	10	23.4082	23.1563
1203	INTS1	Q8N201	Integrator complex subunit 1	244.29	1	1	1	0.9	0.9	0.9	0.0003651	2.3573	4509900	2	17.1594	17.6639
1204	INTS2	Q9H0H0	Integrator complex subunit 2	134.32	1	1	1	1.1	1.1	1.1	0.00071073	2.1636	8155300	2	18.6637	19.8043
1205	INTS3	Q68E01	Integrator complex subunit 3	118.07	9	9	9	10.7	10.7	10.7	0	22.14	108660000	18	22.9516	22.9985
1206	INTS4	Q96HW7	Integrator complex subunit 4	108.17	2	2	2	2.8	2.8	2.8	0.00037793	2.6185	7846100	1	18.7201	18.4979
1207	INTS5	Q6P9B9	Integrator complex subunit 5	107.99	1	1	1	1.4	1.4	1.4	0.004834	1.5019	12984000	1	19.9346	19.4236
1208	INTS7	Q9NVH2	Integrator complex subunit 7	106.83	3	3	3	4.8	4.8	4.8	0	7.9082	35857000	6	22.0229	22.1208
1209	IPO11	Q9UI26	Importin-11	112.53	3	3	3	4.4	4.4	4.4	0	14.499	57372000	5	24.1717	24.2617
1210	IPO4	Q8TEX9	Importin-4	118.71	13	13	13	17.9	17.9	17.9	0	83.18	686230000	22	25.3544	25.4545
1211	IPO5	O00410;O60518	Importin-5	123.63	18	18	18	21.1	21.1	21.1	0	73.324	629550000	35	25.1666	25.6183
1212	IPO7	O95373	Importin-7	119.52	16	16	16	19.4	19.4	19.4	0	82.688	916990000	45	25.8335	25.8818
1213	IPO8	O15397	Importin-8	119.94	7	7	7	8.7	8.7	8.7	0	32.096	139260000	17	24.4846	24.6275
1214	IPO9	Q96P70	Importin-9	115.96	9	9	9	13	13	13	0	111.64	368820000	22	23.9971	24.4584
1215	IQCB1	Q15051	IQ calmodulin-binding motif-containing protein 1	68.928	1	1	1	1.5	1.5	1.5	0.0013671	1.8764	10130000	3	21.1549	17.9235
1216	IQGAP1	P46940	Ras GTPase-activating-like protein IQGAP1	189.25	3	3	3	2.2	2.2	2.2	0	7.5357	58299000	5	23.1135	23.7742
1217	IQGAP2	Q13576	Ras GTPase-activating-like protein IQGAP2	180.58	2	2	2	1.3	1.3	1.3	0.0010537	2.0793	8328100	2	22.0267	18.9075
1218	IQSEC1	Q6DN90;Q5JU85	IQ motif and SEC7 domain-containing protein 1	108.31	3	3	3	4.4	4.4	4.4	0	7.2929	25467000	4	23.314	23.2674
1219	IRAK1	P51617	Interleukin-1 receptor-associated kinase 1	76.536	3	3	3	6.2	6.2	6.2	0	6.1629	25846000	3	20.9578	20.4148
1220	IRF2BP1	Q8IU81	Interferon regulatory factor 2-binding protein 1	61.687	2	2	2	7.5	7.5	7.5	0	5.0477	12821000	2	19.8717	17.4586
1221	IRF2BP2	Q7Z5L9	Interferon regulatory factor 2-binding protein 2	61.024	1	1	1	2	2	2	0.00934	1.278	6850200	1	19.7336	19.9949
1222	IRF3	Q14653	Interferon regulatory factor 3	47.219	1	1	1	5.2	5.2	5.2	0.00039588	2.9958	18464000	2	20.0851	19.8966
1223	IRS4	O14654;H3BTC1	Insulin receptor substrate 4	133.77	26	26	26	25.9	25.9	25.9	0	171.49	1363200000	75	27.6951	27.7596
1224	IST1	P53990	IST1 homolog	39.75	1	1	1	2.5	2.5	2.5	0.0051397	1.4826	19129000	2	20.0608	23.2329
1225	ISY1	Q9ULR0	Pre-mRNA-splicing factor ISY1 homolog	32.992	2	2	2	8.8	8.8	8.8	0	4.644	37208000	4	23.8566	22.1554
1226	ITCH	Q96J02	E3 ubiquitin-protein ligase Itchy homolog	102.8	5	5	5	7.6	7.6	7.6	0	5.3622	24400000	1	18.5688	19.9714
1227	ITGA4	P13612	Integrin alpha-4	114.9	1	1	1	0.7	0.7	0.7	0.0078542	1.3294	32132000	3	23.8945	19.1988
1228	ITM2B	Q9Y287	Integral membrane protein 2B;BRI2, membrane form;BRI2 intracellular domain;BRI2C, soluble form;Bri23 peptide	30.338	1	1	1	3.8	3.8	3.8	0	4.3125	11539000	1	19.6352	18.4634
1229	ITM2C	Q9NQX7	Integral membrane protein 2C;CT-BRI3	30.223	1	1	1	3.7	3.7	3.7	0.0013779	1.9473	4229700	1	21.3002	20.221
1230	ITPA	Q9BY32	Inosine triphosphate pyrophosphatase	21.445	3	3	3	21.1	21.1	21.1	0	11.795	188740000	11	23.1309	22.9904
1231	IVD	P26440	Isovaleryl-CoA dehydrogenase, mitochondrial	46.65	2	2	2	10.6	10.6	10.6	0	33.335	34045000	3	22.3915	22.8923
1232	IVNS1ABP	Q9Y6Y0	Influenza virus NS1A-binding protein	71.729	1	1	1	4	4	4	0	36.692	16582000	2	19.2262	18.7015
1233	JADE3	Q92613	Protein Jade-3	93.807	1	1	1	1.2	1.2	1.2	0.0029861	1.6651	4211400	1	21.2887	19.5702
1234	JAK1	P23458	Tyrosine-protein kinase JAK1	133.28	2	2	2	2.7	2.7	2.7	0.00037951	2.6419	9263100	2	21.7972	21.1191
1235	JUP	P14923	Junction plakoglobin	81.744	6	6	5	10.1	10.1	9	0	24.762	89401000	11	24.1672	24.1621
1236	KARS	Q15046	Lysine--tRNA ligase	68.047	19	19	19	35.5	35.5	35.5	0	170.11	1425100000	71	27.6132	27.6005
1237	KAT2A	Q92830	Histone acetyltransferase KAT2A	93.924	1	1	1	2.2	2.2	2.2	0	8.5286	5883100	1	18.5162	19.5658
1238	KAT8	Q9H7Z6	Histone acetyltransferase KAT8	52.402	2	2	2	5.9	5.9	5.9	0.0010442	2.0103	15718000	1	18.9813	18.871
1239	KATNA1	O75449;Q9BW62	Katanin p60 ATPase-containing subunit A1	55.964	7	7	7	15.1	15.1	15.1	0	10.899	81099000	12	23.6009	23.3174
1240	KATNB1	Q9BVA0	Katanin p80 WD40 repeat-containing subunit B1	72.333	4	4	4	8.7	8.7	8.7	0	7.2969	30626000	2	21.6285	21.5373
1241	KCMF1	Q9P0J7	E3 ubiquitin-protein ligase KCMF1	41.945	4	4	4	15.2	15.2	15.2	0	29.433	100990000	9	22.6277	22.3761
1242	KCTD12	Q96CX2;Q68DU8;Q6ZWB6	BTB/POZ domain-containing protein KCTD12	35.7	9	9	9	28.3	28.3	28.3	0	45.531	230350000	30	23.7956	23.6529
1243	KCTD15	REV__Q14999;Q96SI1	BTB/POZ domain-containing protein KCTD15	191.16	1	1	1	2.5	2.5	2.5	0.0063271	1.3755	3384100	1	18.7647	19.1212
1244	KCTD17	Q8N5Z5	BTB/POZ domain-containing protein KCTD17	35.67	1	1	1	4.7	4.7	4.7	0.0045205	1.516	5119200	1	20.352	20.5739
1245	KCTD2	Q14681	BTB/POZ domain-containing protein KCTD2	28.527	4	4	4	27.4	27.4	27.4	0	37.973	139240000	8	22.974	23.4134
1246	KCTD3	Q9Y597	BTB/POZ domain-containing protein KCTD3	88.983	6	6	5	9.1	9.1	8	0	15.159	65289000	9	24.3498	24.341
1247	KCTD5	Q9NXV2	BTB/POZ domain-containing protein KCTD5	26.092	3	3	3	23.1	23.1	23.1	0	12.648	392320000	12	23.6924	25.0198
1248	KDM1A	O60341	Lysine-specific histone demethylase 1A	92.902	44	44	44	72.2	72.2	72.2	0	323.31	18900000000	297	30.6354	30.4956
1249	KDM3B	Q7LBC6	Lysine-specific demethylase 3B	191.58	8	8	7	7.4	7.4	6.8	0	13.816	62521000	8	21.9725	21.8074
1250	KDM5A	P29375	Lysine-specific demethylase 5A	192.09	1	1	1	0.7	0.7	0.7	0	3.2408	5319400	2	19.6666	18.8601
1251	KDM5D;KDM5C	Q9BY66;P41229	Lysine-specific demethylase 5D;Lysine-specific demethylase 5C	174.07	1	1	1	0.8	0.8	0.8	0.0003867	2.7905	3864300	1	17.8085	19.1081
1252	KEAP1	Q14145	Kelch-like ECH-associated protein 1	69.666	5	5	5	9.1	9.1	9.1	0	8.1633	77199000	6	22.2293	22.3215
1253	KHDRBS1	Q07666;O75525;Q5VWX1	KH domain-containing, RNA-binding, signal transduction-associated protein 1	48.227	9	9	9	19	19	19	0	40.343	772610000	33	25.4013	25.1155
1254	KHSRP	Q92945	Far upstream element-binding protein 2	73.114	7	7	7	15	15	15	0	23.993	129110000	16	23.6841	23.5909
1255	KIAA0020	Q15397	Pumilio domain-containing protein KIAA0020	73.584	3	3	3	5.7	5.7	5.7	0.00039154	2.9109	20372000	1	19.7095	21.491
1256	KIAA0391	O15091	Mitochondrial ribonuclease P protein 3	67.315	1	1	1	2.7	2.7	2.7	0	4.389	22659000	3	21.1993	19.634
1257	KIAA1033	Q2M389	WASH complex subunit 7	136.4	3	3	3	3.8	3.8	3.8	0	4.2129	13496000	3	22.2244	18.2534
1258	KIAA1279	Q96EK5	KIF1-binding protein	71.813	8	8	8	19.5	19.5	19.5	0	20.377	146610000	21	24.6156	24.7626
1259	KIAA1429	Q69YN4	Protein virilizer homolog	202.02	5	5	5	5.5	5.5	5.5	0	20.204	38578000	6	21.2964	21.2455
1260	KIAA1524	Q8TCG1	Protein CIP2A	102.18	8	8	8	9.7	9.7	9.7	0	11.58	133860000	16	24.4749	24.2521
1261	KIAA1671	Q9BY89	Uncharacterized protein KIAA1671	196.71	2	2	2	1.4	1.4	1.4	0.0023665	1.7928	14532000	1	18.9781	21.5688
1262	KIDINS220	Q9ULH0	Kinase D-interacting substrate of 220 kDa	196.54	4	4	4	3.7	3.7	3.7	0	7.8939	34969000	6	21.0907	20.8962
1263	KIF11	P52732	Kinesin-like protein KIF11	119.16	12	12	12	13.4	13.4	13.4	0	25.316	239120000	16	25.8065	25.6719
1264	KIF14	Q15058	Kinesin-like protein KIF14	186.49	61	61	61	43	43	43	0	323.31	3275500000	207	28.6096	28.5418
1265	KIF1C	O43896	Kinesin-like protein KIF1C	122.95	1	1	1	1	1	1	0.0098857	1.2416	3403400	0	19.9589	19.5836
1266	KIF20A	O95235	Kinesin-like protein KIF20A	100.28	5	5	5	8	8	8	0	29.381	54135000	12	23.0044	22.6234
1267	KIF20B	Q96Q89	Kinesin-like protein KIF20B	210.63	6	6	6	4.2	4.2	4.2	0	10.69	42555000	5	24.3703	24.162
1268	KIF21A	Q7Z4S6	Kinesin-like protein KIF21A	187.18	5	4	4	4.7	4	4	0	8.6464	63968000	5	23.2362	22.8945
1269	KIF23	Q02241	Kinesin-like protein KIF23	110.06	5	5	5	7.4	7.4	7.4	0	31.792	96243000	10	22.7907	23.4815
1270	KIF2A	O00139	Kinesin-like protein KIF2A	79.954	8	8	7	12.6	12.6	11.3	0	18.246	126600000	15	24.3033	24.0599
1271	KIF4A;KIF4B	O95239;Q2VIQ3	Chromosome-associated kinesin KIF4A;Chromosome-associated kinesin KIF4B	139.88	4	4	4	3.4	3.4	3.4	0	6.1323	18288000	6	22.3388	22.2092
1272	KIF5B	P33176;O60282;Q12840	Kinesin-1 heavy chain	109.68	35	35	35	48.8	48.8	48.8	0	323.31	1739300000	114	28.1263	28.1705
1273	KIF7	Q2M1P5;Q86VH2;O75037	Kinesin-like protein KIF7	150.59	29	29	28	26.3	26.3	25.5	0	123.82	490490000	62	26.2798	26.4036
1274	KIFAP3	Q92845	Kinesin-associated protein 3	91.204	1	1	1	1.6	1.6	1.6	0.00038956	2.8644	7647500	2	21.8902	18.6113
1275	KIN	O60870	DNA/RNA-binding protein KIN17	45.373	4	4	4	10.2	10.2	10.2	0	9.4199	54430000	8	23.6969	23.865
1276	KLC1	E7EVH7;Q07866	Kinesin light chain 1	83.694	17	17	12	28.7	28.7	18.4	0	101.35	468850000	38	26.7598	26.6273
1277	KLC2	Q9H0B6	Kinesin light chain 2	68.934	15	10	9	26.5	14.5	14.5	0	17.14	69182000	14	23.0236	22.9218
1278	KLC4	Q9NSK0	Kinesin light chain 4	68.639	3	2	2	4.8	4.8	4.8	0	14.8	35240000	3	23.7005	23.7727
1279	KLHL7	Q8IXQ5	Kelch-like protein 7	65.991	1	1	1	1.9	1.9	1.9	0.0093168	1.2693	4880500	0	18.746	20.9834
1280	KMT2A	Q03164	Histone-lysine N-methyltransferase 2A;MLL cleavage product N320;MLL cleavage product C180	431.76	1	1	1	0.4	0.4	0.4	0.0003888	2.8567	4978600	2	21.42	18.2125
1281	KNTC1	P50748	Kinetochore-associated protein 1	250.75	6	6	6	3.7	3.7	3.7	0	10.772	67277000	6	22.5267	22.6089
1282	KPNA1	P52294	Importin subunit alpha-5;Importin subunit alpha-5, N-terminally processed	60.221	6	4	4	10.2	5.6	5.6	0	11.173	45423000	5	23.9472	24.0731
1283	KPNA2	P52292	Importin subunit alpha-1	57.861	17	17	17	47.4	47.4	47.4	0	295.04	1342400000	55	26.6547	26.8103
1284	KPNA3	O00505	Importin subunit alpha-4	57.81	5	4	4	14.6	11.9	11.9	0	11.719	118220000	8	24.3615	24.5457
1285	KPNA4	O00629	Importin subunit alpha-3	57.886	7	7	6	16.3	16.3	13.6	0	16.831	251870000	16	24.327	25.0978
1286	KPNA6	O60684	Importin subunit alpha-7	60.029	8	8	5	21.5	21.5	13.1	0	42.543	362830000	23	24.5157	24.7017
1287	KPNB1	Q14974	Importin subunit beta-1	97.169	25	25	25	34.2	34.2	34.2	0	317.3	2754100000	108	27.465	27.4932
1288	KRI1	Q8N9T8	Protein KRI1 homolog	82.597	1	1	1	2	2	2	0	3.5154	5569300	1	19.7241	21.2436
1289	KTN1	Q86UP2	Kinectin	156.27	16	16	16	15.7	15.7	15.7	0	40.215	194180000	33	25.4579	25.6696
1290	KY	Q8NBH2	Kyphoscoliosis peptidase	63.854	1	1	1	1.2	1.2	1.2	0.0039203	1.5738	3563000	2	17.9378	19.9259
1291	L2HGDH	Q9H9P8	L-2-hydroxyglutarate dehydrogenase, mitochondrial	50.315	3	3	3	10.2	10.2	10.2	0	15.437	23290000	6	20.2294	21.0989
1292	LAGE3	Q14657	EKC/KEOPS complex subunit LAGE3	14.804	1	1	1	16.1	16.1	16.1	0.00037509	2.5724	44141000	4	21.8055	18.8941
1293	LAMP1	P11279	Lysosome-associated membrane glycoprotein 1	44.882	1	1	1	2.2	2.2	2.2	0.0013652	1.8718	14198000	3	19.8248	22.0564
1294	LAMP2	P13473	Lysosome-associated membrane glycoprotein 2	44.96	2	2	2	4.1	4.1	4.1	0.00038895	2.8581	20249000	2	18.3177	20.7482
1295	LAMTOR1	Q6IAA8	Ragulator complex protein LAMTOR1	17.745	1	1	1	7.5	7.5	7.5	0.0029801	1.65	5266800	1	18.4676	20.5711
1296	LAMTOR4	Q0VGL1	Ragulator complex protein LAMTOR4;Ragulator complex protein LAMTOR4, N-terminally processed	10.741	1	1	1	10.1	10.1	10.1	0	4.8141	115380000	4	23.7837	18.0553
1297	LANCL1	O43813	LanC-like protein 1	45.283	2	2	2	4	4	4	0.00040161	3.0817	35163000	4	22.508	22.4699
1298	LANCL2	Q9NS86	LanC-like protein 2	50.854	3	3	3	8.4	8.4	8.4	0	3.8461	18438000	2	21.487	19.3745
1299	LAP3	P28838	Cytosol aminopeptidase	56.166	11	11	11	24.9	24.9	24.9	0	50.681	301390000	27	25.704	25.7757
1300	LARP1	Q6PKG0	La-related protein 1	123.51	16	16	14	20.3	20.3	18.3	0	48.547	427280000	28	25.3333	23.8912
1301	LARP4	Q71RC2	La-related protein 4	80.595	9	9	9	16.2	16.2	16.2	0	86.739	241710000	39	25.172	25.0426
1302	LARP4B	Q92615	La-related protein 4B	80.551	6	6	6	13.8	13.8	13.8	0	9.5291	79911000	7	23.7567	24.1524
1303	LARS	Q9P2J5	Leucine--tRNA ligase, cytoplasmic	134.46	38	38	38	37.6	37.6	37.6	0	323.31	3370800000	117	27.4979	27.7081
1304	LARS2	Q15031	Probable leucine--tRNA ligase, mitochondrial	101.97	3	3	3	3.5	3.5	3.5	0	4.2894	17607000	3	22.8014	22.2152
1305	LAS1L	Q9Y4W2	Ribosomal biogenesis protein LAS1L	83.064	7	7	7	14.4	14.4	14.4	0	39.099	499510000	19	25.4572	25.3446
1306	LASP1	Q14847	LIM and SH3 domain protein 1	29.717	3	3	3	14.9	14.9	14.9	0	18.677	148700000	11	25.0253	25.1734
1307	LBR	Q14739	Lamin-B receptor	70.702	10	10	10	21.1	21.1	21.1	0	75.912	317710000	19	24.9488	24.8859
1308	LCMT1	Q9UIC8	Leucine carboxyl methyltransferase 1	38.379	3	3	3	10.8	10.8	10.8	0	5.0034	58302000	4	23.4092	18.5831
1309	LCMT2	O60294	tRNA wybutosine-synthesizing protein 4	75.601	1	1	1	1.6	1.6	1.6	0.00071608	2.2202	6236900	1	21.7126	18.4059
1310	LDHA	P00338;Q6ZMR3;P07864	L-lactate dehydrogenase A chain	36.688	21	21	20	56	56	52.4	0	323.31	8506000000	128	30.2575	30.2677
1311	LDHB	P07195	L-lactate dehydrogenase B chain	36.638	16	15	15	46.1	42.5	42.5	0	201.93	2586800000	81	28.6477	28.7513
1312	LEMD3	Q9Y2U8	Inner nuclear membrane protein Man1	99.996	1	1	1	1.8	1.8	1.8	0	5.7465	10522000	3	20.1052	22.3433
1313	LEO1	Q8WVC0	RNA polymerase-associated protein LEO1	75.403	3	3	3	4.8	4.8	4.8	0.00040016	3.0612	27125000	4	18.6331	22.5018
1314	LETM1	O95202	LETM1 and EF-hand domain-containing protein 1, mitochondrial	83.353	10	10	10	15.8	15.8	15.8	0	30.374	241260000	22	25.9847	26.0841
1315	LGALSL	Q3ZCW2	Galectin-related protein	18.986	1	1	1	7	7	7	0.0051102	1.4473	5115500	2	21.3938	18.8002
1316	LIG1	P18858	DNA ligase 1	101.73	6	6	6	9.7	9.7	9.7	0	14.41	57356000	8	23.7001	23.7542
1317	LIG3	P49916	DNA ligase 3	112.91	13	13	13	18	18	18	0	74.698	378160000	35	26.2344	26.2702
1318	LIMA1	Q9UHB6	LIM domain and actin-binding protein 1	85.225	11	11	11	18.4	18.4	18.4	0	33.95	154270000	18	25.1299	25.191
1319	LIMD1	Q9UGP4	LIM domain-containing protein 1	72.189	5	5	5	11.7	11.7	11.7	0	22.357	135360000	12	25.0406	24.9869
1320	LIMS1	P48059;Q7Z4I7	LIM and senescent cell antigen-like-containing domain protein 1	37.251	4	4	4	16.6	16.6	16.6	0	6.8041	141040000	13	22.7887	22.8651
1321	LIN28B	Q6ZN17	Protein lin-28 homolog B	27.083	1	1	1	8.4	8.4	8.4	0	4.3505	28697000	6	22.4322	18.0766
1322	LINC00493	A0A096LP01	Small integral membrane protein 26	10.908	1	1	1	16.8	16.8	16.8	0.0081479	1.3237	6661700	1	19.7283	20.9695
1323	LLGL1	Q15334	Lethal(2) giant larvae protein homolog 1	115.42	2	2	2	2.2	2.2	2.2	0	3.5713	19324000	3	19.1837	22.1711
1324	LMAN1	P49257	Protein ERGIC-53	57.548	2	2	2	3.7	3.7	3.7	0.0003858	2.7755	36110000	4	19.0285	23.228
1325	LMAN2	Q12907	Vesicular integral-membrane protein VIP36	40.228	3	3	3	12.9	12.9	12.9	0	6.8117	77566000	7	17.8776	23.0604
1326	LMBRD1	Q9NUN5	Probable lysosomal cobalamin transporter	61.388	1	1	1	3.3	3.3	3.3	0.0010545	2.0822	4701300	1	17.6376	19.1862
1327	LMNB1	P20700	Lamin-B1	66.408	17	17	16	32.3	32.3	30	0	81.952	295070000	28	25.4379	25.3891
1328	LMNB2	Q03252	Lamin-B2	69.948	5	4	4	8.7	6.6	6.6	0	5.7073	15386000	3	22.302	22.7128
1329	LONP1	P36776	Lon protease homolog, mitochondrial	106.49	16	16	16	27.8	27.8	27.8	0	85.657	433400000	43	25.9159	26.1432
1330	LPCAT1	Q8NF37	Lysophosphatidylcholine acyltransferase 1	59.151	2	2	2	6.4	6.4	6.4	0	33.647	23913000	5	19.9037	20.0238
1331	LPP	Q93052	Lipoma-preferred partner	65.746	2	2	2	4.7	4.7	4.7	0	4.7233	21820000	4	20.81	20.7294
1332	LRCH2	Q5VUJ6	Leucine-rich repeat and calponin homology domain-containing protein 2	84.587	3	3	3	5.4	5.4	5.4	0	9.6366	26586000	4	21.6859	22.0967
1333	LRCH3	Q96II8	Leucine-rich repeat and calponin homology domain-containing protein 3	86.082	2	2	2	3	3	3	0.0010604	2.1103	8697500	2	19.9722	20.1129
1334	LRP2	P98164	Low-density lipoprotein receptor-related protein 2	521.95	1	1	1	0.2	0.2	0.2	0.00037078	2.4772	4972600	2	19.3412	18.8384
1335	LRPPRC	P42704	Leucine-rich PPR motif-containing protein, mitochondrial	157.9	48	48	48	42.3	42.3	42.3	0	244.59	3163100000	142	28.8829	28.9354
1336	LRRC1	Q9BTT6	Leucine-rich repeat-containing protein 1	59.241	3	2	2	8	5.5	5.5	0	10.962	21948000	3	19.4438	23.5039
1337	LRRC40	Q9H9A6	Leucine-rich repeat-containing protein 40	68.249	10	10	10	19.9	19.9	19.9	0	19.335	166110000	19	24.4213	24.4605
1338	LRRC41	Q15345	Leucine-rich repeat-containing protein 41	88.649	4	4	4	6.8	6.8	6.8	0	11.315	36057000	8	21.9093	21.7058
1339	LRRC47	Q8N1G4	Leucine-rich repeat-containing protein 47	63.472	22	22	22	37.2	37.2	37.2	0	94.009	1192500000	78	27.2464	27.2505
1340	LRRC59	Q96AG4	Leucine-rich repeat-containing protein 59	34.93	8	8	8	29.3	29.3	29.3	0	23.855	1070100000	27	25.2226	25.7877
1341	LRRC8C	Q8TDW0	Volume-regulated anion channel subunit LRRC8C	92.448	1	1	1	2	2	2	0.00036846	2.4305	5253700	2	21.3366	18.3786
1342	LRRFIP1	Q32MZ4	Leucine-rich repeat flightless-interacting protein 1	89.252	1	1	1	1.7	1.7	1.7	0.00037397	2.559	4553600	1	20.9623	18.2454
1343	LRSAM1	Q6UWE0	E3 ubiquitin-protein ligase LRSAM1	83.593	2	2	2	3.7	3.7	3.7	0	5.3566	7672900	2	18.8584	18.7137
1344	LRWD1	Q9UFC0	Leucine-rich repeat and WD repeat-containing protein 1	70.86	3	3	3	7	7	7	0	12.038	49402000	5	20.9086	21.6
1345	LSG1	Q9H089	Large subunit GTPase 1 homolog	75.225	5	5	5	11.7	11.7	11.7	0	12.338	73545000	7	24.667	24.119
1346	LSM12	Q3MHD2	Protein LSM12 homolog	21.701	2	2	2	13.8	13.8	13.8	0	4.5145	165460000	10	22.9979	18.0843
1347	LSM14B	Q9BX40	Protein LSM14 homolog B	42.07	1	1	1	6.8	6.8	6.8	0.0090484	1.2903	17312000	2	21.3981	18.7495
1348	LSM4	Q9Y4Z0	U6 snRNA-associated Sm-like protein LSm4	15.35	1	1	1	11.5	11.5	11.5	0	4.8094	66567000	4	21.4343	18.9617
1349	LSS	P48449	Lanosterol synthase	83.308	3	3	3	5.5	5.5	5.5	0	3.862	24611000	2	20.7447	19.0201
1350	LTA4H	P09960	Leukotriene A-4 hydrolase	69.284	18	18	18	36.3	36.3	36.3	0	89.286	824620000	42	25.9949	25.8991
1351	LTN1	O94822	E3 ubiquitin-protein ligase listerin	200.55	4	4	4	4.9	4.9	4.9	0	9.5697	55487000	7	22.5889	22.7078
1352	LTV1	Q96GA3	Protein LTV1 homolog	54.854	2	2	2	3.2	3.2	3.2	0	4.7519	27685000	4	23.6892	23.9241
1353	LUC7L	Q9NQ29	Putative RNA-binding protein Luc7-like 1	43.727	8	4	4	23.5	13.5	13.5	0	29.553	45639000	4	24.7135	19.359
1354	LUC7L2	Q9Y383	Putative RNA-binding protein Luc7-like 2	46.513	10	10	6	23.2	23.2	13.8	0	60.356	678980000	35	27.861	27.6857
1355	LUC7L3	O95232	Luc7-like protein 3	51.466	8	8	8	24.5	24.5	24.5	0	34.276	174930000	16	25.3372	25.4801
1356	LUZP1	Q86V48	Leucine zipper protein 1	120.27	13	13	13	16.4	16.4	16.4	0	28.198	119330000	20	25.0388	24.9711
1357	LYAR	Q9NX58	Cell growth-regulating nucleolar protein	43.614	3	3	3	16.6	16.6	16.6	0	5.8258	29872000	6	22.5985	22.7579
1358	LYPLA1	O75608	Acyl-protein thioesterase 1	24.669	3	3	3	15.2	15.2	15.2	0	46.868	64376000	6	19.625	22.3793
1359	LYPLA2	O95372	Acyl-protein thioesterase 2	24.737	2	2	2	14.7	14.7	14.7	0	27.224	133070000	4	22.7479	22.7648
1360	LYPLAL1	Q5VWZ2	Lysophospholipase-like protein 1	26.316	3	3	3	12.7	12.7	12.7	0	8.9134	174810000	8	24.1306	24.0892
1361	LZTFL1	Q9NQ48	Leucine zipper transcription factor-like protein 1	34.592	1	1	1	3.7	3.7	3.7	0.002999	1.6909	2959100	0	18.5874	19.0293
1362	LZTR1	Q8N653	Leucine-zipper-like transcriptional regulator 1	94.718	1	1	1	1.2	1.2	1.2	0.00512	1.4548	4954100	0	20.8288	19.0101
1363	M6PR	P20645	Cation-dependent mannose-6-phosphate receptor	30.993	2	2	2	12.6	12.6	12.6	0.00036245	2.3069	27240000	3	20.7405	22.2871
1364	MACF1	Q9UPN3	Microtubule-actin cross-linking factor 1, isoforms 1/2/3/5	838.3	10	10	10	2.1	2.1	2.1	0	21.825	48436000	11	23.3344	23.4432
1365	MACROD1	Q9BQ69	O-acetyl-ADP-ribose deacetylase MACROD1	35.505	1	1	1	3.1	3.1	3.1	0.0039254	1.5755	17284000	1	17.8113	20.371
1366	MAD1L1	Q9Y6D9	Mitotic spindle assembly checkpoint protein MAD1	83.066	3	3	3	4.2	4.2	4.2	0	6.5119	34291000	4	21.9277	21.9537
1367	MAEA	Q7L5Y9	Macrophage erythroblast attacher	45.287	4	4	4	13.9	13.9	13.9	0	13.173	58815000	3	24.3598	24.3276
1368	MAGED1	Q9Y5V3	Melanoma-associated antigen D1	86.16	10	9	9	18.3	16.7	16.7	0	232.21	280930000	24	25.6886	25.3243
1369	MAGED2	Q9UNF1;Q12816	Melanoma-associated antigen D2	64.953	13	13	12	34.7	34.7	32.7	0	82.488	360650000	35	26.751	26.7489
1370	MAGOH;MAGOHB	P61326;Q96A72	Protein mago nashi homolog;Protein mago nashi homolog 2	17.163	4	4	4	39	39	39	0	6.9746	31147000	5	20.8432	20.6244
1371	MAGT1	Q9H0U3	Magnesium transporter protein 1	38.036	3	3	3	9	9	9	0	4.56	70580000	7	22.8848	23.1651
1372	MAP1A	P78559	Microtubule-associated protein 1A;MAP1A heavy chain;MAP1 light chain LC2	305.48	2	1	1	1.1	0.7	0.7	0.0078493	1.3284	9346800	2	21.2099	19.6867
1373	MAP1B	P46821	Microtubule-associated protein 1B;MAP1B heavy chain;MAP1 light chain LC1	270.63	8	8	7	4.9	4.9	4.5	0	18.211	98620000	10	23.4815	23.6015
1374	MAP1S	Q66K74	Microtubule-associated protein 1S;MAP1S heavy chain;MAP1S light chain	112.21	12	12	12	18.4	18.4	18.4	0	50.781	428230000	23	25.3573	25.4086
1375	MAP2K1	Q02750	Dual specificity mitogen-activated protein kinase kinase 1	43.439	3	2	2	8.9	5.9	5.9	0	3.6214	11280000	2	23.1396	18.1022
1376	MAP2K2	P36507;A0A1B0GUL7	Dual specificity mitogen-activated protein kinase kinase 2	44.424	11	11	10	31.8	31.8	28.8	0	70.858	357660000	26	26.171	26.2275
1377	MAP2K3	P46734	Dual specificity mitogen-activated protein kinase kinase 3	39.318	3	3	3	11.8	11.8	11.8	0	12.832	46427000	5	22.5007	22.3962
1378	MAP2K4	P45985	Dual specificity mitogen-activated protein kinase kinase 4	44.287	2	2	2	12.5	12.5	12.5	0	7.4041	8765200	2	20.2654	19.5348
1379	MAP2K6	P52564	Dual specificity mitogen-activated protein kinase kinase 6	37.492	1	1	1	3.6	3.6	3.6	0.0045322	1.5277	5763200	2	19.7795	18.4648
1380	MAP2K7	O14733	Dual specificity mitogen-activated protein kinase kinase 7	47.484	2	2	2	6.7	6.7	6.7	0	11.112	34364000	8	23.2669	22.3237
1381	MAP3K4	Q9Y6R4	Mitogen-activated protein kinase kinase kinase 4	181.68	13	13	13	10.8	10.8	10.8	0	25.794	234120000	21	23.8873	23.4732
1382	MAP3K5;MAP3K15	Q99683;Q6ZN16	Mitogen-activated protein kinase kinase kinase 5;Mitogen-activated protein kinase kinase kinase 15	154.54	2	2	2	1.4	1.4	1.4	0.00037272	2.5133	5068800	1	20.0476	19.3075
1383	MAP3K7	O43318	Mitogen-activated protein kinase kinase kinase 7	67.195	7	7	7	17.2	17.2	17.2	0	33.974	99280000	14	24.2901	24.096
1384	MAP4K3	Q8IVH8	Mitogen-activated protein kinase kinase kinase kinase 3	101.31	4	4	4	6.7	6.7	6.7	0	16.123	31332000	6	23.0394	23.0489
1385	MAP4K4	O95819;Q8N4C8	Mitogen-activated protein kinase kinase kinase kinase 4	142.1	13	13	8	16.8	16.8	13.1	0	48.593	245940000	21	24.4403	24.4782
1386	MAP4K5	Q9Y4K4	Mitogen-activated protein kinase kinase kinase kinase 5	95.023	2	2	2	3.8	3.8	3.8	0	6.2947	10391000	3	21.8496	21.8157
1387	MAP7D1	Q3KQU3	MAP7 domain-containing protein 1	92.819	7	7	7	10.7	10.7	10.7	0	23.402	57076000	9	21.7414	21.7052
1388	MAP7D3	Q8IWC1	MAP7 domain-containing protein 3	98.428	11	11	11	14.7	14.7	14.7	0	20.735	135480000	17	25.1641	25.3601
1389	MAPKAPK2	P49137	MAP kinase-activated protein kinase 2	45.567	2	2	2	6.5	6.5	6.5	0.0013657	1.872	10959000	0	20.95	18.976
1390	MAPKAPK3	Q16644	MAP kinase-activated protein kinase 3	42.987	1	1	1	4.5	4.5	4.5	0	3.1696	13037000	2	19.709	19.3118
1391	MAPRE1	Q15691	Microtubule-associated protein RP/EB family member 1	29.999	4	4	4	24.3	24.3	24.3	0	11.575	137940000	17	23.954	24.0692
1392	MAPRE2	Q15555	Microtubule-associated protein RP/EB family member 2	37.031	9	9	9	36.1	36.1	36.1	0	47.202	767800000	42	26.4207	26.3542
1393	MARCKS	P29966	Myristoylated alanine-rich C-kinase substrate	31.554	1	1	1	5.7	5.7	5.7	0.0013694	1.8861	8233500	2	19.6508	21.7965
1394	MARCKSL1	P49006	MARCKS-related protein	19.529	1	1	1	7.7	7.7	7.7	0.0010428	2.0024	6349200	1	21.5938	17.3498
1395	MARK1	Q9P0L2	Serine/threonine-protein kinase MARK1	89.002	4	2	2	6.8	4.8	4.8	0	7.2466	12176000	2	20.4729	18.7116
1396	MARK2	Q7KZI7	Serine/threonine-protein kinase MARK2	87.91	12	12	9	20.2	20.2	16.5	0	41.798	163280000	22	24.2819	24.2816
1397	MARK3	P27448;Q96L34	MAP/microtubule affinity-regulating kinase 3	84.428	7	4	4	11.8	8	8	0	18.437	42761000	9	23.4475	23.4105
1398	MARS	P56192	Methionine--tRNA ligase, cytoplasmic	101.11	27	27	27	39.6	39.6	39.6	0	213.3	1797000000	84	27.4873	27.387
1399	MARS2	Q96GW9	Methionine--tRNA ligase, mitochondrial	66.59	2	2	2	3.9	3.9	3.9	0.00039047	2.8834	15257000	4	20.0523	19.8158
1400	MAT2B	Q9NZL9	Methionine adenosyltransferase 2 subunit beta	37.551	1	1	1	6.6	6.6	6.6	0	10.3	10291000	2	18.3814	20.1479
1401	MATR3	P43243	Matrin-3	94.622	30	30	30	49.4	49.4	49.4	0	323.31	3997500000	125	28.2952	28.2039
1402	MAVS	Q7Z434	Mitochondrial antiviral-signaling protein	56.527	1	1	1	2.4	2.4	2.4	0.00071917	2.2525	6742300	2	21.7709	19.0478
1403	MAZ	P56270	Myc-associated zinc finger protein	48.607	4	4	4	9.2	9.2	9.2	0	5.3213	54923000	7	21.3422	21.4903
1404	MBD3	O95983	Methyl-CpG-binding domain protein 3	32.844	3	3	3	8.9	8.9	8.9	0	12.118	58117000	4	21.3132	21.1167
1405	MBNL1	Q9NR56	Muscleblind-like protein 1	41.817	1	1	1	2.8	2.8	2.8	0	8.6882	66837000	4	23.378	19.6464
1406	MBNL2	Q5VZF2	Muscleblind-like protein 2	40.517	1	1	1	2.9	2.9	2.9	0.0087637	1.3168	3213500	0	19.1047	18.6217
1407	MCAT	Q8IVS2	Malonyl-CoA-acyl carrier protein transacylase, mitochondrial	42.961	5	5	5	20.8	20.8	20.8	0	47.715	82768000	8	22.2386	22.4487
1408	MCCC1	Q96RQ3	Methylcrotonoyl-CoA carboxylase subunit alpha, mitochondrial	80.472	2	2	2	5.2	5.2	5.2	0.00036114	2.2951	27798000	1	19.6535	20.6409
1409	MCL1	Q07820	Induced myeloid leukemia cell differentiation protein Mcl-1	37.337	1	1	1	2.6	2.6	2.6	0.0013769	1.9413	4002500	1	18.2934	17.5403
1410	MCM10	Q7L590	Protein MCM10 homolog	98.182	2	2	2	3.2	3.2	3.2	0	12.538	23255000	3	23.0457	22.4319
1411	MCM2	P49736	DNA replication licensing factor MCM2	101.89	16	16	16	25.8	25.8	25.8	0	79.299	622600000	46	26.3239	26.3029
1412	MCM3	P25205	DNA replication licensing factor MCM3	90.98	33	33	33	46.4	46.4	46.4	0	221.93	2224700000	114	27.3962	27.3034
1413	MCM4	P33991	DNA replication licensing factor MCM4	96.557	31	31	30	41.5	41.5	40.7	0	220.97	2937100000	107	28.0172	27.8881
1414	MCM5	P33992	DNA replication licensing factor MCM5	82.285	24	24	24	41.6	41.6	41.6	0	102.18	2149700000	87	26.9326	26.8428
1415	MCM6	Q14566	DNA replication licensing factor MCM6	92.888	27	27	27	33.9	33.9	33.9	0	275.9	2341800000	112	28.3721	28.3191
1416	MCM7	P33993	DNA replication licensing factor MCM7	81.307	32	32	32	50.9	50.9	50.9	0	319.17	4366800000	158	28.6688	28.5293
1417	MCM8	Q9UJA3	DNA helicase MCM8	93.696	2	1	1	2.3	1.4	1.4	0.0013666	1.8749	5038300	1	18.3462	18.6018
1418	MCMBP	Q9BTE3	Mini-chromosome maintenance complex-binding protein	72.979	7	7	7	12.9	12.9	12.9	0	19.147	218330000	17	24.5616	24.5321
1419	MCTS1	Q9ULC4	Malignant T-cell-amplified sequence 1	20.555	7	7	7	50.3	50.3	50.3	0	24.898	346780000	26	23.9858	24.1204
1420	MDC1	Q14676	Mediator of DNA damage checkpoint protein 1	226.66	15	15	15	11.8	11.8	11.8	0	52.832	344220000	39	26.2526	26.2882
1421	MDH2	P40926	Malate dehydrogenase, mitochondrial	35.503	3	3	3	12.1	12.1	12.1	0	14.83	92577000	4	23.1453	23.1674
1422	MDN1	Q9NU22	Midasin	632.81	30	30	30	7.3	7.3	7.3	0	65.221	279810000	38	25.5843	25.4054
1423	MEA1	Q16626	Male-enhanced antigen 1	19.904	1	1	1	7	7	7	0	3.3387	4078400	1	19.0835	19.8033
1424	MEAF6	Q9HAF1	Chromatin modification-related protein MEAF6	21.635	1	1	1	6.8	6.8	6.8	0.00038023	2.6649	5016600	2	19.2451	19.156
1425	MED1	Q15648	Mediator of RNA polymerase II transcription subunit 1	168.48	9	9	9	9.2	9.2	9.2	0	18.711	105740000	12	22.2164	22.0168
1426	MED11	Q9P086	Mediator of RNA polymerase II transcription subunit 11	13.129	2	2	2	23.9	23.9	23.9	0	4.2317	23366000	5	20.6917	20.5394
1427	MED12	Q93074	Mediator of RNA polymerase II transcription subunit 12	243.08	3	3	3	2.5	2.5	2.5	0	3.7532	13625000	5	21.6049	20.392
1428	MED17	A0A1W2PRB8;Q9NVC6	Mediator of RNA polymerase II transcription subunit 17	93.444	3	3	3	3.6	3.6	3.6	0.00037425	2.561	14691000	1	18.1754	21.5046
1429	MED23	Q9ULK4	Mediator of RNA polymerase II transcription subunit 23	156.47	2	2	2	2.5	2.5	2.5	0	4.7868	30786000	5	22.0299	22.1355
1430	MED31	Q9Y3C7	Mediator of RNA polymerase II transcription subunit 31	15.805	1	1	1	10.7	10.7	10.7	0.0020394	1.8354	4242100	0	20.289	20.2862
1431	MEMO1	Q9Y316	Protein MEMO1	33.733	3	3	3	12.1	12.1	12.1	0	5.2359	88214000	11	22.6821	22.4052
1432	MEN1	O00255	Menin	68.023	2	2	2	4.9	4.9	4.9	0	28.662	17408000	3	19.3326	22.2039
1433	METAP1	P53582	Methionine aminopeptidase 1	43.215	2	2	2	6.2	6.2	6.2	0.00036523	2.3624	37315000	3	18.1744	19.9989
1434	METAP2	P50579	Methionine aminopeptidase 2	52.891	4	4	4	19.9	19.9	19.9	0	52.688	150490000	11	25.9206	25.3113
1435	METTL13	Q8N6R0	Methyltransferase-like protein 13	78.767	6	6	6	11.9	11.9	11.9	0	14.71	91787000	8	22.2342	22.0583
1436	METTL15	A6NJ78	Probable methyltransferase-like protein 15	46.121	1	1	1	3.2	3.2	3.2	0.0010552	2.0864	2774600	1	21.4038	18.0128
1437	METTL16	Q86W50	Methyltransferase-like protein 16	63.62	1	1	1	2.1	2.1	2.1	0	3.88	2252400	1	19.9898	19.2066
1438	METTL2A	Q96IZ6	Methyltransferase-like protein 2A	43.537	3	3	2	11.1	11.1	7.1	0	8.0828	38662000	8	22.525	22.5426
1439	METTL2B	Q6P1Q9	Methyltransferase-like protein 2B	43.426	2	1	1	7.4	3.4	3.4	0.00036258	2.3093	39986000	2	24.2108	19.5847
1440	METTL3	Q86U44	N6-adenosine-methyltransferase 70 kDa subunit	64.473	1	1	1	3.8	3.8	3.8	0.005148	1.4945	8403800	1	19.7344	18.8721
1441	METTL5	Q9NRN9	Methyltransferase-like protein 5	23.719	2	2	2	10	10	10	0	3.5915	27560000	6	22.6518	22.405
1442	METTL6	Q8TCB7	Methyltransferase-like protein 6	33.251	1	1	1	3.2	3.2	3.2	0.0045176	1.5138	2211800	1	19.4958	19.2893
1443	METTL7B	Q6UX53	Methyltransferase-like protein 7B	27.775	2	2	2	8.6	8.6	8.6	0.0013661	1.8724	19822000	3	20.2586	20.1535
1444	MFAP1	P55081	Microfibrillar-associated protein 1	51.958	2	2	2	8.4	8.4	8.4	0.00036271	2.3115	24074000	3	22.9603	23.0504
1445	MFAP4	P55083	Microfibril-associated glycoprotein 4	28.648	3	3	3	24.3	24.3	24.3	0	6.7423	136670000	4	23.0569	22.8468
1446	MFN2	O95140	Mitofusin-2	86.401	4	4	4	7	7	7	0	6.884	19694000	5	21.634	21.4236
1447	MFSD1	Q9H3U5	Major facilitator superfamily domain-containing protein 1	51.208	2	2	2	4.5	4.5	4.5	0.00036324	2.3181	8597000	1	19.1258	21.0883
1448	MGA	Q8IWI9	MAX gene-associated protein	331.83	2	2	2	1.2	1.2	1.2	0.00038595	2.7775	17837000	3	22.2366	21.9978
1449	MGAT1	P26572	Alpha-1,3-mannosyl-glycoprotein 2-beta-N-acetylglucosaminyltransferase	50.878	2	2	2	4.5	4.5	4.5	0	4.699	11313000	3	22.0604	22.5623
1450	MGEA5	O60502	Protein O-GlcNAcase	102.91	10	10	10	14.4	14.4	14.4	0	17.538	122160000	16	23.9538	23.7008
1451	MGST3	O14880	Microsomal glutathione S-transferase 3	16.516	1	1	1	9.9	9.9	9.9	0.002993	1.6786	9046800	2	18.9982	18.1954
1452	MICALL1	Q8N3F8	MICAL-like protein 1	93.44	3	3	3	4.1	4.1	4.1	0	4.8688	26236000	4	20.0471	20.581
1453	MID1	O15344;Q9UJV3	E3 ubiquitin-protein ligase Midline-1	75.25	8	8	8	16.9	16.9	16.9	0	22.294	184740000	15	24.2465	24.3892
1454	MIF	P14174	Macrophage migration inhibitory factor	12.476	3	3	3	28.7	28.7	28.7	0	6.2415	88266000	2	22.2691	18.9539
1455	MINA	Q8IUF8	Bifunctional lysine-specific demethylase and histidyl-hydroxylase MINA	52.8	6	6	6	16.1	16.1	16.1	0	7.1719	56246000	7	23.4368	23.427
1456	MIOS	Q9NXC5	WD repeat-containing protein mio	98.583	1	1	1	1.3	1.3	1.3	0.00071149	2.1693	4538400	1	20.7	18.8507
1457	MIPEP	Q99797	Mitochondrial intermediate peptidase	80.64	2	2	2	2.7	2.7	2.7	0	3.7868	22234000	3	20.5512	20.4099
1458	MIS18A	Q9NYP9	Protein Mis18-alpha	25.863	1	1	1	6.4	6.4	6.4	0.0004008	3.072	4895200	2	19.0264	17.152
1459	MITD1	Q8WV92	MIT domain-containing protein 1	29.314	1	1	1	4	4	4	0.00037369	2.5497	3442300	1	18.4908	18.7896
1460	MKI67	P46013	Antigen KI-67	358.69	26	26	26	12.8	12.8	12.8	0	76.118	441760000	57	27.3365	27.0568
1461	MKRN2	Q9H000	Probable E3 ubiquitin-protein ligase makorin-2	46.94	4	4	4	15.1	15.1	15.1	0	11.825	67504000	6	21.8719	21.7742
1462	MLEC	Q14165	Malectin	32.233	5	5	5	17.5	17.5	17.5	0	26.536	85211000	10	24.5532	25.002
1463	MLF2	Q15773	Myeloid leukemia factor 2	28.147	1	1	1	4.8	4.8	4.8	0.0003659	2.3861	4568900	2	21.1126	20.8424
1464	MLLT4	P55196	Afadin	206.8	19	19	19	14.6	14.6	14.6	0	75.818	356800000	32	25.9244	25.8584
1465	MLST8	Q9BVC4	Target of rapamycin complex subunit LST8	35.876	1	1	1	5.5	5.5	5.5	0	3.8727	11097000	1	18.9387	20.0334
1466	MMACHC	Q9Y4U1	Methylmalonic aciduria and homocystinuria type C protein	31.728	3	3	3	13.5	13.5	13.5	0	7.8686	37399000	5	21.6942	18.7505
1467	MMGT1	Q8N4V1	Membrane magnesium transporter 1	14.686	3	3	3	41.2	41.2	41.2	0	29.813	77261000	4	23.8186	23.9889
1468	MMS19	Q96T76	MMS19 nucleotide excision repair protein homolog	113.29	6	6	6	8.3	8.3	8.3	0	12.212	65122000	7	21.8423	21.5811
1469	MMS22L	Q6ZRQ5	Protein MMS22-like	142.32	2	2	2	1.5	1.5	1.5	0	4.4249	10754000	2	19.4482	19.897
1470	MOGS	Q13724	Mannosyl-oligosaccharide glucosidase	91.916	5	5	5	10.3	10.3	10.3	0	13.489	97408000	5	22.4728	22.4149
1471	MON2	Q7Z3U7	Protein MON2 homolog	190.36	1	1	1	0.9	0.9	0.9	0.00036603	2.3865	23173000	2	20.5388	18.5741
1472	MORC4	Q8TE76	MORC family CW-type zinc finger protein 4	106.35	4	4	4	5.3	5.3	5.3	0	4.711	41179000	7	21.6649	21.3596
1473	MOV10	Q9HCE1	Putative helicase MOV-10	113.67	10	10	10	14	14	14	0	35.414	167440000	21	23.8493	23.7524
1474	MPC2	O95563	Mitochondrial pyruvate carrier 2	14.279	1	1	1	9.4	9.4	9.4	0.0010578	2.0974	3303500	1	18.4324	17.4114
1475	MPDU1	O75352	Mannose-P-dolichol utilization defect 1 protein	26.638	2	2	2	8.1	8.1	8.1	0	6.2234	81849000	8	24.3257	24.7692
1476	MPG	P29372	DNA-3-methyladenine glycosylase	32.868	6	6	6	27.9	27.9	27.9	0	13.432	120050000	11	23.2528	23.1388
1477	MPHOSPH6	Q99547	M-phase phosphoprotein 6	19.024	3	3	3	25	25	25	0	5.7705	56510000	6	23.1522	23.0407
1478	MPHOSPH8	Q99549	M-phase phosphoprotein 8	97.181	3	3	3	6.6	6.6	6.6	0	8.1251	36931000	6	23.5677	23.244
1479	MPRIP	Q6WCQ1	Myosin phosphatase Rho-interacting protein	116.53	5	5	5	7.7	7.7	7.7	0	8.6094	56048000	8	23.634	23.6964
1480	MPST	P25325	3-mercaptopyruvate sulfurtransferase	33.178	4	4	4	19.9	19.9	19.9	0	6.3068	38059000	7	22.9781	23.1325
1481	MPZL1	O95297	Myelin protein zero-like protein 1	29.082	1	1	1	3.7	3.7	3.7	0.0023649	1.783	6924900	2	19.2282	19.3555
1482	MRE11A	P49959	Double-strand break repair protein MRE11A	80.592	11	11	11	18.2	18.2	18.2	0	34.293	165930000	16	24.9005	24.4484
1483	MRFAP1	Q9Y605	MORF4 family-associated protein 1	14.649	1	1	1	18.9	18.9	18.9	0	7.1053	9169500	2	20.0059	17.2864
1484	MRI1	Q9BV20	Methylthioribose-1-phosphate isomerase	39.149	11	11	11	43.4	43.4	43.4	0	53.098	493460000	34	25.9141	26.0777
1485	MRPL10	Q7Z7H8	39S ribosomal protein L10, mitochondrial	29.282	1	1	1	3.8	3.8	3.8	0.0003701	2.4635	4728700	1	18.7158	20.1801
1486	MRPL11	Q9Y3B7	39S ribosomal protein L11, mitochondrial	20.683	2	2	2	10.4	10.4	10.4	0	3.5657	4877500	2	18.8737	20.0654
1487	MRPL12	P52815	39S ribosomal protein L12, mitochondrial	21.348	2	1	1	12.1	6.6	6.6	0.0020401	1.8355	3808000	2	19.1541	19.0624
1488	MRPL22	Q9NWU5	39S ribosomal protein L22, mitochondrial	23.64	2	2	2	11.7	11.7	11.7	0	5.3262	17772000	4	21.0494	21.1444
1489	MRPL24	Q96A35	39S ribosomal protein L24, mitochondrial	24.915	1	1	1	4.6	4.6	4.6	0.00071994	2.2586	4758000	2	21.3717	18.9519
1490	MRPL28	Q13084	39S ribosomal protein L28, mitochondrial	30.156	2	2	2	11.7	11.7	11.7	0	4.8293	16956000	3	21.8211	21.5424
1491	MRPL3	P09001	39S ribosomal protein L3, mitochondrial	38.632	1	1	1	4	4	4	0.00038226	2.709	8049700	1	18.3375	20.7029
1492	MRPL37	Q9BZE1	39S ribosomal protein L37, mitochondrial	48.117	1	1	1	2.4	2.4	2.4	0.002991	1.6763	12160000	1	19.7943	20.1894
1493	MRPL38	Q96DV4	39S ribosomal protein L38, mitochondrial	44.596	2	2	2	6.8	6.8	6.8	0	3.2478	20168000	2	20.9959	19.1517
1494	MRPL39	Q9NYK5	39S ribosomal protein L39, mitochondrial	38.711	1	1	1	3.6	3.6	3.6	0.0039164	1.5678	3291400	0	19.0063	19.2442
1495	MRPL41	Q8IXM3	39S ribosomal protein L41, mitochondrial	15.383	2	2	2	12.4	12.4	12.4	0	3.7529	22597000	4	21.095	20.9728
1496	MRPL43	Q8N983	39S ribosomal protein L43, mitochondrial	23.431	2	2	2	10.7	10.7	10.7	0	4.1335	14442000	2	20.1722	17.9026
1497	MRPL45	Q9BRJ2	39S ribosomal protein L45, mitochondrial	35.351	3	3	3	16.3	16.3	16.3	0	4.9508	34016000	4	19.24	20.9858
1498	MRPL47	Q9HD33	39S ribosomal protein L47, mitochondrial	29.45	1	1	1	4	4	4	0.0078839	1.3423	1862000	1	19.0945	20.9995
1499	MRPL54	Q6P161	39S ribosomal protein L54, mitochondrial	15.819	1	1	1	7.2	7.2	7.2	0.00037189	2.5038	11493000	2	18.2445	21.8975
1500	MRPL9	Q9BYD2	39S ribosomal protein L9, mitochondrial	30.243	1	1	1	3	3	3	0.0029732	1.6299	20177000	4	18.0619	23.039
1501	MRPS10	P82664	28S ribosomal protein S10, mitochondrial	22.999	3	3	3	14.9	14.9	14.9	0.00038685	2.7943	21144000	3	21.5773	17.6133
1502	MRPS12	O15235	28S ribosomal protein S12, mitochondrial	15.173	2	2	2	8.7	8.7	8.7	0.0051298	1.4734	12001000	0	21.5336	18.8944
1503	MRPS15	P82914	28S ribosomal protein S15, mitochondrial	29.842	3	3	3	12.1	12.1	12.1	0	4.3025	27504000	5	21.8857	21.8577
1504	MRPS16	Q9Y3D3	28S ribosomal protein S16, mitochondrial	15.345	2	2	2	20.4	20.4	20.4	0.00039216	2.9209	52423000	6	21.5288	21.4032
1505	MRPS18B	Q9Y676	28S ribosomal protein S18b, mitochondrial	29.395	3	3	3	8.5	8.5	8.5	0	8.1426	39100000	8	22.7286	22.9929
1506	MRPS2	Q9Y399	28S ribosomal protein S2, mitochondrial	33.249	7	7	7	34.1	34.1	34.1	0	54.494	93628000	14	22.4097	22.138
1507	MRPS21	P82921	28S ribosomal protein S21, mitochondrial	10.688	1	1	1	13.8	13.8	13.8	0.00036166	2.3041	33767000	2	19.958	18.4979
1508	MRPS22	P82650	28S ribosomal protein S22, mitochondrial	41.28	8	8	8	29.2	29.2	29.2	0	31.657	185440000	14	23.6904	23.8295
1509	MRPS23	Q9Y3D9	28S ribosomal protein S23, mitochondrial	21.77	3	3	3	23.7	23.7	23.7	0	6.7815	40627000	2	21.3247	19.8071
1510	MRPS24	Q96EL2	28S ribosomal protein S24, mitochondrial	19.015	3	3	3	18	18	18	0	5.318	27056000	5	20.9338	20.1765
1511	MRPS25	P82663	28S ribosomal protein S25, mitochondrial	20.116	2	2	2	13.3	13.3	13.3	0.00039714	3.0221	26959000	3	22.4682	22.5701
1512	MRPS26	Q9BYN8	28S ribosomal protein S26, mitochondrial	24.211	4	4	4	15.6	15.6	15.6	0	8.9234	66235000	5	23.6515	23.1848
1513	MRPS27	Q92552	28S ribosomal protein S27, mitochondrial	47.611	6	6	6	22.5	22.5	22.5	0	28.266	118340000	9	24.3504	24.2352
1514	MRPS30	Q9NP92	28S ribosomal protein S30, mitochondrial	50.364	1	1	1	4.3	4.3	4.3	0.0051364	1.4812	4860200	1	18.6138	18.8981
1515	MRPS31	Q92665	28S ribosomal protein S31, mitochondrial	45.318	6	6	6	22.3	22.3	22.3	0	5.1755	58806000	3	18.4754	24.4481
1516	MRPS33	Q9Y291	28S ribosomal protein S33, mitochondrial	12.629	1	1	1	11.3	11.3	11.3	0.0020408	1.8364	5008800	1	18.7832	18.2568
1517	MRPS34	P82930	28S ribosomal protein S34, mitochondrial	25.65	6	6	6	29.8	29.8	29.8	0	12.115	146110000	18	23.3826	23.2807
1518	MRPS35	P82673	28S ribosomal protein S35, mitochondrial	36.844	4	4	4	13.9	13.9	13.9	0	25.142	49337000	6	23.0712	23.0966
1519	MRPS5	P82675	28S ribosomal protein S5, mitochondrial	48.006	2	2	2	6	6	6	0	11.034	33430000	3	23.556	22.7593
1520	MRPS6	P82932	28S ribosomal protein S6, mitochondrial	14.226	2	2	2	25.6	25.6	25.6	0.00040145	3.081	65873000	4	23.5477	23.268
1521	MRPS7	Q9Y2R9	28S ribosomal protein S7, mitochondrial	28.134	8	8	8	43	43	43	0	21.832	140420000	19	24.7621	24.5085
1522	MRPS9	P82933	28S ribosomal protein S9, mitochondrial	45.834	9	9	9	33.6	33.6	33.6	0	33.857	250420000	15	23.8397	23.9729
1523	MRTO4	Q9UKD2	mRNA turnover protein 4 homolog	27.56	9	9	9	32.6	32.6	32.6	0	38.344	170130000	20	24.2713	24.4094
1524	MSH2	P43246	DNA mismatch repair protein Msh2	104.74	23	23	23	29.1	29.1	29.1	0	114.66	826480000	57	26.4742	26.623
1525	MSH3	P20585	DNA mismatch repair protein Msh3	127.41	4	4	4	5.1	5.1	5.1	0	3.9866	19009000	3	20.6038	20.6601
1526	MSH6	P52701	DNA mismatch repair protein Msh6	152.78	21	21	21	21.1	21.1	21.1	0	105.34	1136100000	66	26.1385	26.1887
1527	MSI1	O43347	RNA-binding protein Musashi homolog 1	39.124	2	2	2	14.6	14.6	14.6	0.00037807	2.6209	27447000	2	21.1921	19.3681
1528	MSI2	Q96DH6	RNA-binding protein Musashi homolog 2	35.196	2	2	2	14	14	14	0.00036914	2.4411	32956000	3	23.1586	17.9689
1529	MSL1	Q68DK7	Male-specific lethal 1 homolog	67.128	1	1	1	1.8	1.8	1.8	0.0013788	1.9528	8391400	2	22.1448	19.6366
1530	MSMO1	Q15800	Methylsterol monooxygenase 1	35.215	1	1	1	4.8	4.8	4.8	0	21.737	17299000	2	18.9493	19.0845
1531	MSTO1	Q9BUK6	Protein misato homolog 1	61.835	2	2	2	6.1	6.1	6.1	0.0010593	2.1031	28435000	1	20.5425	18.4099
1532	MT-ATP6	P00846	ATP synthase subunit a	24.817	1	1	1	4.4	4.4	4.4	0.00038388	2.7443	30571000	2	20.8873	19.5288
1533	MT-CO2	P00403	Cytochrome c oxidase subunit 2	25.565	4	4	4	34.8	34.8	34.8	0	31.128	277520000	12	23.3347	23.7646
1534	MTA1	Q13330	Metastasis-associated protein MTA1	80.785	6	4	3	10.6	7.4	6	0	8.0662	47925000	7	23.1132	23.1515
1535	MTA2	O94776	Metastasis-associated protein MTA2	75.022	13	13	11	24.4	24.4	21	0	27.053	240550000	31	25.2691	25.2378
1536	MTA3	Q9BTC8	Metastasis-associated protein MTA3	67.503	5	2	2	10.8	5.2	5.2	0.00039463	2.9779	14638000	1	21.8974	20.2751
1537	MTARC1	Q5VT66	Mitochondrial amidoxime-reducing component 1	37.499	2	2	2	8.3	8.3	8.3	0	6.0582	36948000	3	20.8594	21.0814
1538	MTCH1	Q9NZJ7	Mitochondrial carrier homolog 1	41.544	1	1	1	3.1	3.1	3.1	0.0090568	1.2966	4710500	2	18.2171	17.8909
1539	MTCH2	Q9Y6C9	Mitochondrial carrier homolog 2	33.331	3	3	3	15.2	15.2	15.2	0	25.746	134010000	11	22.8014	21.9133
1540	MTDH	Q86UE4	Protein LYRIC	63.836	9	9	9	19.6	19.6	19.6	0	62.401	190550000	22	25.8107	26.1174
1541	MTFR1	Q15390	Mitochondrial fission regulator 1	37	1	1	1	3.6	3.6	3.6	0.0036077	1.5869	4664200	0	21.2863	18.9329
1542	MTFR1L	Q9H019	Mitochondrial fission regulator 1-like	31.957	2	2	2	9.2	9.2	9.2	0	3.2133	9130000	2	20.3242	20.3045
1543	MTHFD1	P11586	C-1-tetrahydrofolate synthase, cytoplasmic;Methylenetetrahydrofolate dehydrogenase;Methenyltetrahydrofolate cyclohydrolase;Formyltetrahydrofolate synthetase;C-1-tetrahydrofolate synthase, cytoplasmic, N-terminally processed	101.56	48	48	48	61.9	61.9	61.9	0	264.02	5529800000	207	29.1207	29.1861
1544	MTHFD1L	Q6UB35	Monofunctional C1-tetrahydrofolate synthase, mitochondrial	105.79	12	12	12	14	14	14	0	27.003	236150000	34	25.2548	25.2921
1545	MTHFD2	P13995	Bifunctional methylenetetrahydrofolate dehydrogenase/cyclohydrolase, mitochondrial;NAD-dependent methylenetetrahydrofolate dehydrogenase;Methenyltetrahydrofolate cyclohydrolase	37.895	2	2	2	6.6	6.6	6.6	0	3.7066	36944000	3	19.4281	21.8605
1546	MTIF2	P46199	Translation initiation factor IF-2, mitochondrial	81.316	2	2	2	4	4	4	0	4.7571	4094500	3	19.28	21.0199
1547	MTMR1	Q13613	Myotubularin-related protein 1	74.677	3	3	3	6.2	6.2	6.2	0	13.511	57713000	4	22.2259	22.0634
1548	MTMR3	Q13615	Myotubularin-related protein 3	133.62	2	2	2	2.9	2.9	2.9	0	3.48	17746000	5	22.4112	22.24
1549	MTMR9	Q96QG7	Myotubularin-related protein 9	63.461	1	1	1	2.6	2.6	2.6	0	3.5382	10316000	3	21.518	19.1913
1550	MTOR	P42345	Serine/threonine-protein kinase mTOR	288.89	60	60	60	33.4	33.4	33.4	0	323.31	3045400000	155	28.0384	27.9005
1551	MTPAP	Q9NVV4	Poly(A) RNA polymerase, mitochondrial	66.171	3	3	3	5.2	5.2	5.2	0	4.3454	19680000	5	22.2624	22.1207
1552	MTR	Q99707	Methionine synthase	140.53	2	2	2	2.7	2.7	2.7	0	4.7997	17242000	3	18.1939	20.7456
1553	MTX1	Q13505	Metaxin-1	51.462	5	5	5	15.5	15.5	15.5	0	21.746	99107000	9	22.7984	22.8587
1554	MUT	P22033	Methylmalonyl-CoA mutase, mitochondrial	83.134	2	2	2	3.3	3.3	3.3	0	5.6031	24734000	6	22.304	22.2707
1555	MXRA7	P84157	Matrix-remodeling-associated protein 7	21.466	1	1	1	14.2	14.2	14.2	0	28.466	9584400	1	20.1159	18.7527
1556	MYBBP1A	Q9BQG0	Myb-binding protein 1A	148.85	33	33	33	31.6	31.6	31.6	0	133.08	844620000	59	25.8627	25.9356
1557	MYCBP	Q99417	C-Myc-binding protein	11.967	3	3	3	31.1	31.1	31.1	0	5.7643	54675000	8	24.0939	24.1551
1558	MYCBP2	O75592	E3 ubiquitin-protein ligase MYCBP2	513.63	9	9	9	3.2	3.2	3.2	0	34.642	93191000	15	24.1151	24.1127
1559	MYH10	P35580	Myosin-10	229	51	44	42	31.6	28.1	27.1	0	284.99	690900000	98	26.8785	27.5939
1560	MYH14	Q7Z406	Myosin-14	227.87	6	3	3	3.6	1.9	1.9	0	6.8642	19696000	5	22.5607	22.7147
1561	MYH9	P35579	Myosin-9	226.53	56	56	47	31.1	31.1	27.6	0	323.31	1497400000	149	28.2459	28.4432
1562	MYL1;MYL3	P05976;P08590	Myosin light chain 1/3, skeletal muscle isoform;Myosin light chain 3	21.145	1	1	1	8.2	8.2	8.2	0	4.6847	63894000	5	21.3158	18.533
1563	MYL12A;MYL12B	P19105;O14950;P24844	Myosin regulatory light chain 12A;Myosin regulatory light chain 12B	19.794	5	5	5	24	24	24	0	25.63	221910000	13	23.8516	24.1203
1564	MYL6	P60660;P14649	Myosin light polypeptide 6	16.93	5	5	5	41.7	41.7	41.7	0	23.881	460490000	24	25.0819	25.1756
1565	MYO1B	O43795	Unconventional myosin-Ib	131.98	8	8	8	11.3	11.3	11.3	0	28.496	73479000	13	21.5515	21.6946
1566	MYO1C	O00159	Unconventional myosin-Ic	121.68	6	6	6	7.7	7.7	7.7	0	6.9943	72184000	4	22.6191	22.4768
1567	MYO1D	O94832	Unconventional myosin-Id	116.2	5	5	5	6.5	6.5	6.5	0	10.031	61105000	7	22.2639	22.2491
1568	MYO6	Q9UM54	Unconventional myosin-VI	149.69	22	22	22	19.8	19.8	19.8	0	96.341	377900000	39	25.966	25.9875
1569	N4BP1	O75113	NEDD4-binding protein 1	100.38	3	3	3	4.2	4.2	4.2	0	11.466	35779000	6	22.9756	23.0234
1570	N4BP2	Q86UW6	NEDD4-binding protein 2	198.8	2	2	2	2.4	2.4	2.4	0.0010468	2.0282	282580000	2	17.8247	26.7544
1571	NAA10	P41227;Q9BSU3	N-alpha-acetyltransferase 10	26.458	10	10	10	43.8	43.8	43.8	0	39.882	382650000	19	25.0061	24.6992
1572	NAA15	Q9BXJ9;Q6N069	N-alpha-acetyltransferase 15, NatA auxiliary subunit	101.27	36	36	36	44.9	44.9	44.9	0	137.25	1398800000	113	27.2621	27.1747
1573	NAA35	Q5VZE5	N-alpha-acetyltransferase 35, NatC auxiliary subunit	83.638	2	2	2	3	3	3	0	3.9961	25245000	5	22.0317	22.0195
1574	NAA50	Q9GZZ1	N-alpha-acetyltransferase 50	19.398	10	10	10	45	45	45	0	43.143	698200000	33	26.5972	26.5081
1575	NACA	E9PAV3	Nascent polypeptide-associated complex subunit alpha, muscle-specific form	205.42	2	2	2	1.4	1.4	1.4	0	4.1625	7895300	2	19.6195	18.7759
1576	NACC1	Q96RE7	Nucleus accumbens-associated protein 1	57.258	3	3	3	7.6	7.6	7.6	0	5.7436	79841000	9	23.1046	23.1589
1577	NACC2	Q96BF6	Nucleus accumbens-associated protein 2	62.836	6	6	6	11.9	11.9	11.9	0	15.044	165240000	16	23.9814	23.9412
1578	NAE1	Q13564	NEDD8-activating enzyme E1 regulatory subunit	60.246	1	1	1	1.9	1.9	1.9	0.0036101	1.5898	18799000	1	20.4365	19.0591
1579	NAGK	Q9UJ70	N-acetyl-D-glucosamine kinase	37.375	3	3	3	8.4	8.4	8.4	0	6.6535	14952000	3	20.3873	20.4071
1580	NAMPT	P43490	Nicotinamide phosphoribosyltransferase	55.52	17	17	17	43.8	43.8	43.8	0	323.31	1228000000	62	25.8997	25.9496
1581	NANS	Q9NR45	Sialic acid synthase	40.307	8	8	8	35.4	35.4	35.4	0	47.073	422320000	25	24.3693	24.6927
1582	NAP1L1	P55209;Q99733	Nucleosome assembly protein 1-like 1	45.374	12	12	12	48.8	48.8	48.8	0	150.42	1712100000	54	26.2726	26.295
1583	NAPA	P54920;Q9H115	Alpha-soluble NSF attachment protein	33.232	5	5	5	18.6	18.6	18.6	0	8.9681	74307000	6	24.6855	25.1044
1584	NARS	O43776	Asparagine--tRNA ligase, cytoplasmic	62.942	17	17	17	31.6	31.6	31.6	0	149.52	1507800000	55	26.7197	26.7585
1585	NASP	P49321	Nuclear autoantigenic sperm protein	85.237	8	8	8	18.1	18.1	18.1	0	25.047	69419000	10	23.9381	24.1073
1586	NAT1	P18440	Arylamine N-acetyltransferase 1	33.898	1	1	1	3.1	3.1	3.1	0.002038	1.8316	7346800	2	21.85	18.4084
1587	NAT10	Q9H0A0	N-acetyltransferase 10	115.73	13	13	13	16.9	16.9	16.9	0	50.027	306370000	29	24.8299	24.9162
1588	NAV1	Q8NEY1	Neuron navigator 1	202.47	5	5	5	4.1	4.1	4.1	0	6.5714	26110000	6	22.8014	22.9237
1589	NBN	O60934	Nibrin	84.958	9	9	9	17.9	17.9	17.9	0	27.901	52879000	13	22.9304	22.8954
1590	NBPF3;NBPF10;NBPF11;NBPF8;NBPF1;NBPF19;NBPF7;NBPF15;NBPF12	P0DPF3;Q9H094;Q6P3W6;Q86T75;Q3BBV2;Q3BBV0;A0A087WUL8;P0DPF2;P0C2Y1;Q8N660;Q5TAG4	Neuroblastoma breakpoint family member 3;Neuroblastoma breakpoint family member 10;Neuroblastoma breakpoint family member 11;Putative neuroblastoma breakpoint family member 8;Neuroblastoma breakpoint family member 1;Putative neuroblastoma breakpoint family member 7;Neuroblastoma breakpoint family member 15;Neuroblastoma breakpoint family member 12	127.75	2	2	2	2.5	2.5	2.5	0.00039139	2.9087	335320000	3	24.285	19.3016
1591	NBR1	Q14596	Next to BRCA1 gene 1 protein	107.41	1	1	1	2.1	2.1	2.1	0.00038285	2.7245	4880600	1	21.3906	18.342
1592	NCAPD2	Q15021	Condensin complex subunit 1	157.18	20	20	20	19.8	19.8	19.8	0	71.017	336120000	30	25.1296	25.1658
1593	NCAPD3	P42695	Condensin-2 complex subunit D3	168.89	9	9	9	8.1	8.1	8.1	0	60.521	189770000	16	23.818	23.8266
1594	NCAPG	Q9BPX3	Condensin complex subunit 3	114.33	9	9	9	11.3	11.3	11.3	0	32.62	169540000	18	23.5358	23.693
1595	NCAPG2	Q86XI2	Condensin-2 complex subunit G2	130.96	6	6	6	6.9	6.9	6.9	0	10.524	39333000	7	22.6496	22.6648
1596	NCAPH	Q15003	Condensin complex subunit 2	82.562	16	16	16	25	25	25	0	146.9	643570000	52	26.7361	26.8035
1597	NCBP1	Q09161	Nuclear cap-binding protein subunit 1	91.838	12	12	12	15.6	15.6	15.6	0	36.594	279410000	27	25.3368	25.5698
1598	NCBP2	P52298	Nuclear cap-binding protein subunit 2	18.001	5	5	5	25	25	25	0	12.451	69062000	9	23.3316	23.0415
1599	NCBP2-AS2	Q69YL0	Uncharacterized protein NCBP2-AS2	10.89	1	1	1	14.1	14.1	14.1	0.0003647	2.3513	11884000	2	19.4165	18.6608
1600	NCDN	Q9UBB6	Neurochondrin	78.863	3	3	3	5.3	5.3	5.3	0	8.6614	61864000	7	23.5602	23.4629
1601	NCKAP1	Q9Y2A7;P55160	Nck-associated protein 1	128.79	5	5	5	5.2	5.2	5.2	0	11.382	68111000	5	21.7038	21.9258
1602	NCKIPSD	Q9NZQ3	NCK-interacting protein with SH3 domain	78.959	1	1	1	3.6	3.6	3.6	0	4.6736	16066000	1	19.8423	17.9155
1603	NCL	P19338	Nucleolin	76.613	4	4	4	7.2	7.2	7.2	0	11.646	54064000	8	24.1605	23.9396
1604	NCLN	Q969V3	Nicalin	62.974	8	8	8	20.1	20.1	20.1	0	35.723	109740000	9	22.9595	22.9224
1605	NCOA2	Q15596	Nuclear receptor coactivator 2	159.15	1	1	1	0.8	0.8	0.8	0.0042139	1.5311	1593700	0	19.4033	19.214
1606	NCOA5	Q9HCD5	Nuclear receptor coactivator 5	65.536	8	8	8	26.4	26.4	26.4	0	94.969	144130000	12	23.4294	23.9983
1607	NCOR1	O75376	Nuclear receptor corepressor 1	270.21	32	32	30	17.3	17.3	16.6	0	154.94	866180000	53	27.1999	27.2684
1608	NCOR2	Q9Y618	Nuclear receptor corepressor 2	273.65	30	28	28	16.4	15.7	15.7	0	58.072	405420000	38	25.2196	25.3463
1609	NDC80	O14777	Kinetochore protein NDC80 homolog	73.912	1	1	1	2.2	2.2	2.2	0	3.1349	4235200	1	17.9187	19.9552
1610	NDFIP2	Q9NV92	NEDD4 family-interacting protein 2	36.389	1	1	1	4.2	4.2	4.2	0	3.408	37460000	4	18.7138	22.7964
1611	NDRG1	Q92597	Protein NDRG1	42.835	8	8	8	35.5	35.5	35.5	0	55.261	590440000	30	25.6544	25.8985
1612	NDRG3	Q9UGV2	Protein NDRG3	41.408	2	2	2	12.8	12.8	12.8	0	4.0186	33022000	3	21.7779	21.9671
1613	NDUFA1	O15239	NADH dehydrogenase [ubiquinone] 1 alpha subcomplex subunit 1	8.0723	1	1	1	18.6	18.6	18.6	0.00040177	3.0849	18531000	4	20.4233	19.9815
1614	NDUFA10	O95299	NADH dehydrogenase [ubiquinone] 1 alpha subcomplex subunit 10, mitochondrial	40.75	8	8	8	24.8	24.8	24.8	0	20.984	333350000	18	24.1773	24.3344
1615	NDUFA12	Q9UI09	NADH dehydrogenase [ubiquinone] 1 alpha subcomplex subunit 12	17.114	5	5	5	34.5	34.5	34.5	0	5.8595	53921000	3	20.8399	20.5779
1616	NDUFA13	Q9P0J0;E7ENQ6	NADH dehydrogenase [ubiquinone] 1 alpha subcomplex subunit 13	16.698	4	4	4	32.6	32.6	32.6	0	12.528	117740000	13	23.3616	23.418
1617	NDUFA4	O00483	Cytochrome c oxidase subunit NDUFA4	9.3697	3	3	3	53.1	53.1	53.1	0	8.3067	235900000	8	23.3628	23.2891
1618	NDUFA5	Q16718	NADH dehydrogenase [ubiquinone] 1 alpha subcomplex subunit 5	13.459	2	2	2	31	31	31	0	14.132	115440000	8	22.559	22.5061
1619	NDUFA6	P56556	NADH dehydrogenase [ubiquinone] 1 alpha subcomplex subunit 6	15.136	3	3	3	22.7	22.7	22.7	0	6.0951	66567000	8	22.955	23.2262
1620	NDUFA8	P51970	NADH dehydrogenase [ubiquinone] 1 alpha subcomplex subunit 8	20.105	6	6	6	49.4	49.4	49.4	0	14.757	165030000	17	23.9703	24.5725
1621	NDUFA9	Q16795;H3BRM9	NADH dehydrogenase [ubiquinone] 1 alpha subcomplex subunit 9, mitochondrial	42.509	6	6	6	22.5	22.5	22.5	0	18.673	125980000	11	22.6453	22.7215
1622	NDUFAF1	Q9Y375	Complex I intermediate-associated protein 30, mitochondrial	37.763	1	1	1	5.8	5.8	5.8	0.0026981	1.7738	4415100	1	19.2475	17.8881
1623	NDUFAF2	Q8N183	Mimitin, mitochondrial	19.856	2	2	2	17.8	17.8	17.8	0.00038358	2.7329	31009000	5	19.9526	20.3735
1624	NDUFAF3	Q9BU61	NADH dehydrogenase [ubiquinone] 1 alpha subcomplex assembly factor 3	20.35	3	3	3	19.6	19.6	19.6	0	70.797	38848000	4	20.8833	18.9891
1625	NDUFAF4	Q9P032	NADH dehydrogenase [ubiquinone] 1 alpha subcomplex assembly factor 4	20.266	1	1	1	8	8	8	0	10.728	55206000	2	21.9115	19.7615
1626	NDUFB1	O75438	NADH dehydrogenase [ubiquinone] 1 beta subcomplex subunit 1	6.9611	1	1	1	19	19	19	0.00039277	2.9288	21480000	2	21.2719	19.7824
1627	NDUFB10	O96000	NADH dehydrogenase [ubiquinone] 1 beta subcomplex subunit 10	20.776	4	4	4	29.1	29.1	29.1	0	12.868	110120000	10	22.5575	22.7155
1628	NDUFB11	Q9NX14	NADH dehydrogenase [ubiquinone] 1 beta subcomplex subunit 11, mitochondrial	17.316	1	1	1	15	15	15	0	4.1152	26460000	4	20.8981	18.7645
1629	NDUFB4	O95168	NADH dehydrogenase [ubiquinone] 1 beta subcomplex subunit 4	15.208	2	2	2	19.4	19.4	19.4	0.00039825	3.0412	49269000	2	21.1313	18.7443
1630	NDUFB9	Q9Y6M9	NADH dehydrogenase [ubiquinone] 1 beta subcomplex subunit 9	21.831	3	3	3	22.3	22.3	22.3	0	12.338	26418000	2	19.9714	18.1095
1631	NDUFC1	O43677	NADH dehydrogenase [ubiquinone] 1 subunit C1, mitochondrial	8.7341	1	1	1	10.5	10.5	10.5	0.0029782	1.6496	1621800000	13	18.1695	29.0609
1632	NDUFC2	O95298	NADH dehydrogenase [ubiquinone] 1 subunit C2	14.187	2	2	2	16.8	16.8	16.8	0.00039355	2.9505	33965000	2	22.8414	23.3266
1633	NDUFS1	P28331	NADH-ubiquinone oxidoreductase 75 kDa subunit, mitochondrial	79.467	7	7	7	12.8	12.8	12.8	0	14.176	82886000	7	22.4247	22.6219
1634	NDUFS2	O75306	NADH dehydrogenase [ubiquinone] iron-sulfur protein 2, mitochondrial	52.545	4	4	4	13.8	13.8	13.8	0	7.9744	81383000	7	21.8025	22.0887
1635	NDUFS3	O75489	NADH dehydrogenase [ubiquinone] iron-sulfur protein 3, mitochondrial	30.241	7	7	7	37.9	37.9	37.9	0	23.588	171320000	14	23.3909	23.4832
1636	NDUFS4	O43181	NADH dehydrogenase [ubiquinone] iron-sulfur protein 4, mitochondrial	20.108	1	1	1	5.1	5.1	5.1	0.005153	1.4979	9686100	1	22.1178	18.9951
1637	NDUFS5	O43920	NADH dehydrogenase [ubiquinone] iron-sulfur protein 5	12.517	1	1	1	11.3	11.3	11.3	0.00038052	2.6742	16762000	1	18.8934	17.6462
1638	NDUFS6	O75380	NADH dehydrogenase [ubiquinone] iron-sulfur protein 6, mitochondrial	13.711	2	2	2	24.2	24.2	24.2	0.00039308	2.9426	8424000	2	18.132	20.1772
1639	NDUFS7	O75251	NADH dehydrogenase [ubiquinone] iron-sulfur protein 7, mitochondrial	23.563	3	3	3	21.6	21.6	21.6	0	12.122	44597000	1	20.796	19.1865
1640	NDUFS8	O00217	NADH dehydrogenase [ubiquinone] iron-sulfur protein 8, mitochondrial	23.705	4	4	4	18.6	18.6	18.6	0	22.875	128700000	8	22.9573	22.9693
1641	NDUFV1	P49821	NADH dehydrogenase [ubiquinone] flavoprotein 1, mitochondrial	50.817	2	2	2	3.9	3.9	3.9	0.0003992	3.0482	12840000	2	19.2202	19.8569
1642	NDUFV2	P19404	NADH dehydrogenase [ubiquinone] flavoprotein 2, mitochondrial	27.391	1	1	1	4	4	4	0.00039984	3.0605	9105400	2	20.2575	18.2725
1643	NEDD8;NEDD8-MDP1	Q15843;E9PL57	NEDD8	9.0714	3	3	3	50.6	50.6	50.6	0	9.706	327780000	15	25.5906	25.5537
1644	NEFL	P07196	Neurofilament light polypeptide	61.516	7	5	5	17.7	14.4	14.4	0	24.176	38144000	6	22.3466	22.2954
1645	NEFM	P07197;Q16352	Neurofilament medium polypeptide	102.47	25	24	23	39.4	38.4	37.4	0	94.304	564720000	52	27.1542	27.2925
1646	NEK7	Q8TDX7	Serine/threonine-protein kinase Nek7	34.551	2	2	2	8.6	8.6	8.6	0	3.176	39169000	3	20.0085	19.2539
1647	NEK9	Q8TD19;REV__Q9P0M6	Serine/threonine-protein kinase Nek9	107.17	11	11	11	12.4	12.4	12.4	0	24.53	84646000	11	23.2617	23.4314
1648	NELFB	Q8WX92	Negative elongation factor B	65.697	6	6	6	10.7	10.7	10.7	0	10.913	97786000	12	24.9163	25.0194
1649	NEMF	O60524	Nuclear export mediator factor NEMF	122.95	3	3	3	3.3	3.3	3.3	0	5.3161	10794000	4	21.6398	21.3091
1650	NEU1	Q99519	Sialidase-1	45.467	2	2	2	5.3	5.3	5.3	0.0013784	1.9478	8717100	2	18.4798	19.3208
1651	NF1	P21359	Neurofibromin;Neurofibromin truncated	319.37	2	2	2	1.1	1.1	1.1	0	4.8209	8037900	2	18.542	18.4144
1652	NFATC3	Q12968	Nuclear factor of activated T-cells, cytoplasmic 3	115.59	3	3	3	3.4	3.4	3.4	0.000392	2.9182	14878000	4	21.7717	21.5448
1653	NFRKB	Q6P4R8	Nuclear factor related to kappa-B-binding protein	139	1	1	1	1.2	1.2	1.2	0.0032927	1.606	9043000	2	17.967	21.8871
1654	NFS1	Q9Y697;H0YGN5	Cysteine desulfurase, mitochondrial	50.195	3	3	3	9	9	9	0	4.2662	27333000	3	21.7599	21.9772
1655	NFX1	Q12986	Transcriptional repressor NF-X1	124.39	3	3	3	4.7	4.7	4.7	0	12.349	32383000	5	21.0935	20.7136
1656	NFXL1	Q6ZNB6	NF-X1-type zinc finger protein NFXL1	101.34	3	3	3	5.9	5.9	5.9	0	5.1655	44860000	6	22.3067	22.0981
1657	NGDN	Q8NEJ9	Neuroguidin	35.894	1	1	1	5.7	5.7	5.7	0.0026765	1.7372	4556000	0	17.2253	20.5446
1658	NHLRC2	Q8NBF2	NHL repeat-containing protein 2	79.443	2	2	2	2.8	2.8	2.8	0.0023721	1.8098	13488000	2	21.7341	20.3327
1659	NHP2L1	P55769	NHP2-like protein 1;NHP2-like protein 1, N-terminally processed	14.173	3	3	3	28.1	28.1	28.1	0	5.5223	36291000	1	18.6255	22.6574
1660	NIFK	Q9BYG3	MKI67 FHA domain-interacting nucleolar phosphoprotein	34.222	2	2	2	10.6	10.6	10.6	0	4.4615	15302000	3	22.6118	22.8215
1661	NIPBL	Q6KC79	Nipped-B-like protein	316.05	4	4	4	2.4	2.4	2.4	0	7.6958	38604000	4	24.0333	23.6183
1662	NIPSNAP1	Q9BPW8	Protein NipSnap homolog 1	33.31	1	1	1	5.3	5.3	5.3	0.00039888	3.0449	13551000	2	19.9482	19.085
1663	NIT1	Q86X76	Nitrilase homolog 1	35.896	2	2	2	7.6	7.6	7.6	0	3.4481	26460000	1	20.5768	20.0583
1664	NIT2	Q9NQR4	Omega-amidase NIT2	30.608	2	2	2	9.8	9.8	9.8	0.0013638	1.8667	7072300	2	19.7229	18.4471
1665	NKAP	Q8N5F7	NF-kappa-B-activating protein	47.138	3	3	3	7.5	7.5	7.5	0	7.2105	53519000	5	22.9156	22.7485
1666	NKRF	O15226	NF-kappa-B-repressing factor	77.672	6	6	6	8.8	8.8	8.8	0	13.215	133640000	17	24.6891	24.5851
1667	NKX2-5	P52952	Homeobox protein Nkx-2.5	34.917	1	1	1	4.9	4.9	4.9	0.0029831	1.6604	5187300	2	20.7983	18.5972
1668	NLE1	Q9NVX2	Notchless protein homolog 1	53.32	1	1	1	2.3	2.3	2.3	0.00071839	2.2437	50663000	2	24.5168	19.2803
1669	NMD3	Q96D46	60S ribosomal export protein NMD3	57.603	8	8	8	22.9	22.9	22.9	0	20.145	171800000	13	24.2454	23.9323
1670	NME1;NME2	P15531;P22392;O60361	Nucleoside diphosphate kinase A;Nucleoside diphosphate kinase B	17.149	4	4	4	33.6	33.6	33.6	0	9.7768	286410000	9	24.4387	24.2982
1671	NME3	Q13232	Nucleoside diphosphate kinase 3	19.015	3	3	3	14.2	14.2	14.2	0	4.502	28788000	4	22.565	22.1499
1672	NMRAL1	Q9HBL8	NmrA-like family domain-containing protein 1	33.344	2	2	2	5.4	5.4	5.4	0.00039124	2.9083	11998000	4	20.76	20.6797
1673	NNT	Q13423	NAD(P) transhydrogenase, mitochondrial	113.89	2	2	2	2	2	2	0	3.7885	28245000	4	21.4952	21.7739
1674	NOA1	Q8NC60	Nitric oxide-associated protein 1	78.457	3	3	3	6.4	6.4	6.4	0	12.106	42433000	7	23.3909	23.6585
1675	NOB1	Q9ULX3	RNA-binding protein NOB1	46.674	7	7	7	26	26	26	0	12.956	177540000	11	22.7627	22.4159
1676	NOC2L	Q9Y3T9	Nucleolar complex protein 2 homolog	84.918	4	4	4	5.5	5.5	5.5	0	7.4063	65265000	7	22.3039	22.1922
1677	NOC4L	Q9BVI4	Nucleolar complex protein 4 homolog	58.467	3	3	3	11.4	11.4	11.4	0	12.312	54063000	4	21.2864	21.1802
1678	NOL11	Q9H8H0	Nucleolar protein 11	81.123	1	1	1	2.6	2.6	2.6	0.0036113	1.5928	11889000	1	19.4079	18.4732
1679	NOL6	Q9H6R4	Nucleolar protein 6	127.59	4	4	4	5.1	5.1	5.1	0	16.563	56504000	7	23.7333	23.2987
1680	NOL8	Q76FK4	Nucleolar protein 8	131.61	1	1	1	0.9	0.9	0.9	0.00040241	3.0921	2834000	1	20.8353	21.6055
1681	NOL9	Q5SY16	Polynucleotide 5-hydroxyl-kinase NOL9	79.322	7	7	7	18.1	18.1	18.1	0	41.786	189930000	14	23.5051	23.4977
1682	NOLC1	Q14978	Nucleolar and coiled-body phosphoprotein 1	73.602	4	4	4	8.2	8.2	8.2	0	5.2527	46184000	8	24.3631	23.7765
1683	NOM1	Q5C9Z4	Nucleolar MIF4G domain-containing protein 1	96.256	1	1	1	1.5	1.5	1.5	0.0010571	2.0944	2784300	1	19.4734	17.9211
1684	NOMO1	Q15155	Nodal modulator 1	134.32	4	4	1	4.1	4.1	1.4	0	13.749	67311000	9	24.6515	24.6861
1685	NONO	Q15233	Non-POU domain-containing octamer-binding protein	54.231	29	29	27	62.4	62.4	60.7	0	323.31	8032800000	162	29.7871	29.838
1686	NOP14	P78316	Nucleolar protein 14	97.667	10	10	10	12.6	12.6	12.6	0	29.297	151680000	23	24.54	24.6722
1687	NOP16	Q9Y3C1	Nucleolar protein 16	21.188	2	2	2	10.1	10.1	10.1	0.0010582	2.0975	11083000	4	20.3782	20.3276
1688	NOP2	P46087	Probable 28S rRNA (cytosine(4447)-C(5))-methyltransferase	89.301	8	8	8	11.3	11.3	11.3	0	17.68	79792000	14	23.9514	23.7389
1689	NOP56	O00567	Nucleolar protein 56	66.049	5	5	5	12.8	12.8	12.8	0	14.541	116320000	12	25.215	25.2607
1690	NOP58	Q9Y2X3	Nucleolar protein 58	59.578	12	12	12	27.2	27.2	27.2	0	61.179	236630000	30	26.2082	26.2247
1691	NOP9	Q86U38	Nucleolar protein 9	69.437	2	2	2	3.8	3.8	3.8	0	4.0593	17912000	3	20.4881	20.7365
1692	NOSIP	Q9Y314	Nitric oxide synthase-interacting protein	33.172	11	11	11	39.9	39.9	39.9	0	29.723	344400000	28	24.5121	24.7542
1693	NPLOC4	Q8TAT6	Nuclear protein localization protein 4 homolog	68.119	7	7	7	14.6	14.6	14.6	0	25.209	150390000	15	23.072	23.1234
1694	NPM1	P06748	Nucleophosmin	32.575	9	9	9	34.7	34.7	34.7	0	157.18	1176500000	28	27.6225	27.5837
1695	NPM3	O75607	Nucleoplasmin-3	19.343	2	2	2	17.4	17.4	17.4	0	77.405	262800000	8	23.2886	23.4731
1696	NPTN	Q9Y639	Neuroplastin	44.387	2	2	2	5.5	5.5	5.5	0.00036873	2.4351	10672000	2	19.656	20.2358
1697	NR2C1	P13056	Nuclear receptor subfamily 2 group C member 1	67.314	1	1	1	4.5	4.5	4.5	0.0010541	2.0805	7536500	1	18.7502	19.2172
1698	NR3C1	P04150	Glucocorticoid receptor	85.658	5	5	5	10.2	10.2	10.2	0	15.608	31801000	8	22.5373	22.3773
1699	NRDE2	Q9H7Z3	Protein NRDE2 homolog	132.67	1	1	1	1	1	1	0.0036149	1.5966	7101300	1	21.9195	20.4117
1700	NSDHL	Q15738	Sterol-4-alpha-carboxylate 3-dehydrogenase, decarboxylating	41.9	7	7	7	29.5	29.5	29.5	0	35.41	203680000	17	24.1523	24.0757
1701	NSF	P46459	Vesicle-fusing ATPase	82.593	16	16	16	22.6	22.6	22.6	0	39.523	314590000	29	25.2269	25.2701
1702	NSMCE4A	Q9NXX6	Non-structural maintenance of chromosomes element 4 homolog A	44.301	1	1	1	3.9	3.9	3.9	0.00071301	2.1777	17562000	1	23.2326	20.2892
1703	NSUN2	Q08J23	tRNA (cytosine(34)-C(5))-methyltransferase	86.47	24	24	24	44.9	44.9	44.9	0	223.38	1748500000	77	27.8809	27.9529
1704	NSUN4	Q96CB9	5-methylcytosine rRNA methyltransferase NSUN4	43.088	2	2	2	7.3	7.3	7.3	0.00039904	3.0471	17252000	2	20.7029	18.5408
1705	NSUN5	Q96P11;Q63ZY6	Probable 28S rRNA (cytosine-C(5))-methyltransferase	46.691	6	6	6	18.6	18.6	18.6	0	14.832	104840000	9	22.9735	23.1659
1706	NSUN6	Q8TEA1	Putative methyltransferase NSUN6	51.77	1	1	1	1.9	1.9	1.9	0.0096124	1.2557	4227000	1	19.6637	19.7736
1707	NT5C	Q8TCD5	5(3)-deoxyribonucleotidase, cytosolic type	23.382	3	3	3	25.9	25.9	25.9	0	5.8404	76460000	5	21.5047	21.2842
1708	NT5C3B	Q969T7	7-methylguanosine phosphate-specific 5-nucleotidase	34.389	1	1	1	3	3	3	0.00036496	2.3556	1588100	1	15.01	18.8726
1709	NT5DC1	Q5TFE4	5-nucleotidase domain-containing protein 1	51.844	9	9	9	30.5	30.5	30.5	0	21.613	194720000	16	23.8933	23.7248
1710	NTPCR	Q9BSD7	Cancer-related nucleoside-triphosphatase	20.713	7	7	7	44.2	44.2	44.2	0	45.473	406410000	22	24.5371	24.4764
1711	NUB1	Q9Y5A7	NEDD8 ultimate buster 1	70.537	4	4	4	7.5	7.5	7.5	0	8.2379	58611000	7	24.346	24.0807
1712	NUBP2	Q9Y5Y2	Cytosolic Fe-S cluster assembly factor NUBP2	28.825	3	3	3	24.7	24.7	24.7	0	9.635	98394000	7	22.1681	22.3117
1713	NUBPL	Q8TB37	Iron-sulfur protein NUBPL	34.082	1	1	1	2.2	2.2	2.2	0.0093313	1.2751	6599200	2	21.629	19.4644
1714	NUDC	Q9Y266	Nuclear migration protein nudC	38.242	2	2	2	7.9	7.9	7.9	0	3.7388	11004000	2	22.6752	18.6507
1715	NUDT21	O43809	Cleavage and polyadenylation specificity factor subunit 5	26.227	1	1	1	7.9	7.9	7.9	0	4.1332	14192000	2	20.816	19.0495
1716	NUF2	Q9BZD4	Kinetochore protein Nuf2	54.303	3	3	3	13.1	13.1	13.1	0	9.3411	153020000	7	24.9876	24.7147
1717	NUFIP2	Q7Z417	Nuclear fragile X mental retardation-interacting protein 2	76.12	19	19	19	39	39	39	0	212.16	2363400000	61	26.7455	26.4366
1718	NUMA1	Q14980	Nuclear mitotic apparatus protein 1	238.26	16	16	16	11	11	11	0	63.685	165640000	24	25.3952	25.3478
1719	NUMB	P49757	Protein numb homolog	70.803	3	3	3	5.7	5.7	5.7	0	3.9738	124300000	6	23.8401	18.827
1720	NUMBL	Q9Y6R0	Numb-like protein	64.891	2	2	2	2	2	2	0.003002	1.6983	18470000	4	22.0288	19.6748
1721	NUP107	P57740	Nuclear pore complex protein Nup107	106.37	16	16	16	21.1	21.1	21.1	0	80.241	327400000	42	24.9811	24.8857
1722	NUP133	Q8WUM0	Nuclear pore complex protein Nup133	128.98	22	22	22	27.2	27.2	27.2	0	83.092	552890000	39	25.1276	24.9955
1723	NUP153	P49790	Nuclear pore complex protein Nup153	153.94	10	10	10	8.6	8.6	8.6	0	33.261	195110000	24	24.9069	24.7185
1724	NUP155	O75694	Nuclear pore complex protein Nup155	155.2	17	17	17	17.8	17.8	17.8	0	82.573	568810000	38	25.1432	24.9858
1725	NUP160	Q12769	Nuclear pore complex protein Nup160	162.12	8	8	8	9.5	9.5	9.5	0	35.283	97537000	11	23.876	23.7608
1726	NUP188	Q5SRE5;H7C4K7	Nucleoporin NUP188 homolog	196.04	10	10	10	8.1	8.1	8.1	0	25.093	180830000	21	24.7664	24.7515
1727	NUP205	Q92621	Nuclear pore complex protein Nup205	227.92	23	23	23	13.4	13.4	13.4	0	118.91	744250000	55	27.069	26.9536
1728	NUP214	P35658	Nuclear pore complex protein Nup214	213.62	13	13	13	8.9	8.9	8.9	0	28.383	202680000	21	24.7985	24.9136
1729	NUP37	Q8NFH4	Nucleoporin Nup37	36.707	4	4	4	13.8	13.8	13.8	0	6.0487	87250000	7	23.8832	24.0914
1730	NUP43	Q8NFH3	Nucleoporin Nup43	42.15	1	1	1	8.4	8.4	8.4	0	3.7589	12421000	2	19.8019	19.9467
1731	NUP50	Q9UKX7	Nuclear pore complex protein Nup50	50.144	3	3	3	12.6	12.6	12.6	0	6.138	41663000	9	21.9134	21.6231
1732	NUP62	P37198	Nuclear pore glycoprotein p62	53.254	4	4	4	10	10	10	0	8.2174	74630000	6	22.6113	22.6436
1733	NUP85	Q9BW27	Nuclear pore complex protein Nup85	75.019	2	2	2	4.3	4.3	4.3	0	4.725	59725000	2	22.0637	18.9548
1734	NUP88	Q99567	Nuclear pore complex protein Nup88	83.541	7	7	7	14.3	14.3	14.3	0	38.606	133590000	21	24.3374	24.287
1735	NUP93	Q8N1F7	Nuclear pore complex protein Nup93	93.487	28	28	28	43.5	43.5	43.5	0	323.31	1424900000	74	27.0417	26.969
1736	NUP98	P52948	Nuclear pore complex protein Nup98-Nup96;Nuclear pore complex protein Nup98;Nuclear pore complex protein Nup96	197.58	7	7	7	4.1	4.1	4.1	0	32.744	70329000	12	23.4035	23.4013
1737	NUPL2	O15504	Nucleoporin-like protein 2	44.871	1	1	1	3.3	3.3	3.3	0.0029742	1.6322	1997800	0	18.9945	18.5675
1738	NVL	O15381	Nuclear valosin-containing protein-like	95.05	14	14	14	18.8	18.8	18.8	0	59.572	268600000	35	25.8374	25.7959
1739	NXF1	Q9UBU9	Nuclear RNA export factor 1	70.182	10	10	10	20.4	20.4	20.4	0	34.782	182090000	14	24.1804	24.1575
1740	NXN	Q6DKJ4	Nucleoredoxin	48.392	1	1	1	2.5	2.5	2.5	0	4.0932	6388100	2	17.7352	19.3764
1741	OAT	P04181	Ornithine aminotransferase, mitochondrial;Ornithine aminotransferase, hepatic form;Ornithine aminotransferase, renal form	48.534	13	13	13	48.5	48.5	48.5	0	113.86	473700000	36	24.5772	24.7569
1742	OBSL1	O75147	Obscurin-like protein 1	206.94	5	5	5	3	3	3	0	7.9406	30745000	5	21.3941	21.8607
1743	OCIAD1	Q9NX40	OCIA domain-containing protein 1	27.626	2	2	2	7.3	7.3	7.3	0.00039857	3.043	9783600	2	21.9843	21.9499
1744	OCLN	Q16625	Occludin	59.143	1	1	1	2.9	2.9	2.9	0	3.5632	5261900	1	19.1791	19.7751
1745	OCRL	Q01968	Inositol polyphosphate 5-phosphatase OCRL-1	104.2	5	5	5	7.1	7.1	7.1	0	10.264	84714000	9	22.0702	22.1984
1746	OGFOD1	Q8N543	Prolyl 3-hydroxylase OGFOD1	63.245	3	3	3	7.9	7.9	7.9	0	7.264	42147000	5	21.9217	22.0511
1747	OGFOD3	Q6PK18	2-oxoglutarate and iron-dependent oxygenase domain-containing protein 3	35.646	1	1	1	2.5	2.5	2.5	0.0051331	1.4759	2946700	1	17.8017	18.5715
1748	OGT	O15294	UDP-N-acetylglucosamine--peptide N-acetylglucosaminyltransferase 110 kDa subunit	116.92	12	12	12	14.7	14.7	14.7	0	67.604	237760000	23	24.8018	24.7182
1749	OIP5	O43482	Protein Mis18-beta	24.691	1	1	1	6.1	6.1	6.1	0	4.285	4034700	1	16.9661	18.745
1750	OPA1	O60313	Dynamin-like 120 kDa protein, mitochondrial;Dynamin-like 120 kDa protein, form S1	111.63	8	8	8	10.4	10.4	10.4	0	21.187	84999000	14	24.0126	23.8732
1751	OPA3	Q9H6K4	Optic atrophy 3 protein	19.996	1	1	1	3.9	3.9	3.9	0.0051151	1.4504	16502000	3	20.0687	18.6583
1752	ORC2	Q13416	Origin recognition complex subunit 2	65.971	6	6	6	16.3	16.3	16.3	0	18.62	40460000	4	21.6635	21.5933
1753	ORC3	Q9UBD5	Origin recognition complex subunit 3	82.253	3	3	3	6.3	6.3	6.3	0	8.7852	49401000	6	21.6532	21.8367
1754	ORMDL2;ORMDL1;ORMDL3	Q53FV1;Q9P0S3;Q8N138	ORM1-like protein 2;ORM1-like protein 1;ORM1-like protein 3	17.363	2	2	2	17	17	17	0	4.1678	22412000	3	21.6559	21.5941
1755	OSBPL11	Q9BXB4	Oxysterol-binding protein-related protein 11	83.642	18	18	18	34.1	34.1	34.1	0	159.38	617330000	44	26.2172	25.9469
1756	OSBPL3	Q9H4L5	Oxysterol-binding protein-related protein 3	101.22	5	5	5	7.8	7.8	7.8	0	17.471	30663000	8	22.8173	22.6339
1757	OSBPL8	Q9BZF1	Oxysterol-binding protein-related protein 8	101.19	2	2	2	3.5	3.5	3.5	0	8.0872	48978000	8	23.3453	23.6469
1758	OSBPL9	Q96SU4	Oxysterol-binding protein-related protein 9	83.184	16	16	16	30.3	30.3	30.3	0	65.436	461290000	46	25.5207	25.2475
1759	OSGEP	Q9NPF4	Probable tRNA N6-adenosine threonylcarbamoyltransferase	36.426	3	3	3	14.3	14.3	14.3	0	4.6199	29603000	5	20.2614	20.4486
1760	OSTF1	Q92882	Osteoclast-stimulating factor 1	23.787	1	1	1	5.6	5.6	5.6	0.00036643	2.3905	28035000	1	20.9036	19.8743
1761	OTUB1	Q96FW1	Ubiquitin thioesterase OTUB1	31.284	12	12	12	63.1	63.1	63.1	0	186.85	1158900000	49	26.0382	25.94
1762	OTUD4	Q01804	OTU domain-containing protein 4	124.04	1	1	1	1.4	1.4	1.4	0	4.0936	3520700	1	19.8119	17.696
1763	OTUD6B	Q8N6M0	OTU domain-containing protein 6B	33.812	2	2	2	7.8	7.8	7.8	0.00071531	2.211	5831500	1	17.7899	19.6902
1764	OTULIN	Q96BN8	Ubiquitin thioesterase otulin	40.262	5	5	5	16.2	16.2	16.2	0	10.694	50036000	10	23.0092	23.0928
1765	OXA1L	Q15070	Mitochondrial inner membrane protein OXA1L	48.547	2	2	2	4.6	4.6	4.6	0.003008	1.7265	21087000	0	18.4976	21.0123
1766	OXCT1	P55809	Succinyl-CoA:3-ketoacid coenzyme A transferase 1, mitochondrial	56.157	6	6	6	16.7	16.7	16.7	0	30.443	82026000	11	24.0241	23.9852
1767	OXSR1	O95747	Serine/threonine-protein kinase OSR1	58.022	1	1	1	1.5	1.5	1.5	0.0010395	1.9859	4826900	1	18.1946	18.875
1768	P4HB	P07237	Protein disulfide-isomerase	57.116	12	12	12	31.3	31.3	31.3	0	93.457	363770000	29	26.1114	26.2081
1769	PA2G4	Q9UQ80;H0YIN7	Proliferation-associated protein 2G4	43.786	22	22	22	60.7	60.7	60.7	0	234.64	3115400000	114	29.2715	29.236
1770	PABPC1	P11940;Q9H361;Q4VXU2	Polyadenylate-binding protein 1	70.67	33	33	22	64.2	64.2	45.3	0	323.31	7533700000	195	29.8308	29.5105
1771	PABPC4	Q13310;P0CB38	Polyadenylate-binding protein 4	70.782	26	18	17	41.3	25.9	24.5	0	55.904	1773000000	71	27.7098	27.2803
1772	PABPN1	Q86U42	Polyadenylate-binding protein 2	32.749	1	1	1	5.2	5.2	5.2	0	3.2131	1975200	0	18.362	19.4172
1773	PACSIN2	Q9UNF0	Protein kinase C and casein kinase substrate in neurons protein 2	55.738	6	6	6	12.6	12.6	12.6	0	8.3831	104050000	5	25.2086	25.0745
1774	PACSIN3	Q9UKS6	Protein kinase C and casein kinase substrate in neurons protein 3	48.486	3	3	3	9.2	9.2	9.2	0	6.8294	49225000	7	22.7275	22.5532
1775	PAF1	Q8N7H5	RNA polymerase II-associated factor 1 homolog	59.975	9	9	9	20.7	20.7	20.7	0	13.801	99721000	8	23.7895	24.3858
1776	PAFAH1B1	P43034	Platelet-activating factor acetylhydrolase IB subunit alpha	46.637	8	8	8	29.3	29.3	29.3	0	27.104	402640000	23	26.2705	26.054
1777	PAFAH1B3	Q15102	Platelet-activating factor acetylhydrolase IB subunit gamma	25.734	4	4	4	26.8	26.8	26.8	0	19.406	31655000	5	21.8572	21.6127
1778	PAICS	P22234	Multifunctional protein ADE2;Phosphoribosylaminoimidazole-succinocarboxamide synthase;Phosphoribosylaminoimidazole carboxylase	47.079	7	7	7	18.8	18.8	18.8	0	30.775	205510000	17	23.9966	24.0311
1779	PAK4	O96013	Serine/threonine-protein kinase PAK 4	64.071	1	1	1	5.8	5.8	5.8	0.003006	1.7164	7429500	1	18.7296	19.7809
1780	PALLD	Q8WX93	Palladin	150.56	3	3	3	2.8	2.8	2.8	0	8.1172	26204000	5	22.4318	22.4012
1781	PAM16	Q9Y3D7	Mitochondrial import inner membrane translocase subunit TIM16	13.825	1	1	1	18.4	18.4	18.4	0	8.7547	23608000	1	19.4973	18.4352
1782	PAN3	Q58A45	PAB-dependent poly(A)-specific ribonuclease subunit PAN3	95.612	1	1	1	1.1	1.1	1.1	0.0010549	2.0822	4687200	2	21.3453	18.6637
1783	PANK4	Q9NVE7	Pantothenate kinase 4	85.99	2	2	2	2.7	2.7	2.7	0	10.451	41473000	4	24.0081	24.2126
1784	PAPD5	Q8NDF8	Non-canonical poly(A) RNA polymerase PAPD5	63.266	1	1	1	2.6	2.6	2.6	0.00070872	2.1314	11582000	4	22.3988	22.7005
1785	PAPOLB;PAPOLA;PAPOLG	Q9NRJ5;P51003;Q9BWT3	Poly(A) polymerase beta;Poly(A) polymerase alpha;Poly(A) polymerase gamma	71.681	2	2	2	2.7	2.7	2.7	0	4.5539	36931000	6	22.6508	22.9612
1786	PAPSS1	O43252	Bifunctional 3-phosphoadenosine 5-phosphosulfate synthase 1;Sulfate adenylyltransferase;Adenylyl-sulfate kinase	70.832	11	11	11	26.1	26.1	26.1	0	31.012	219270000	22	24.1652	23.9196
1787	PAPSS2	O95340	Bifunctional 3-phosphoadenosine 5-phosphosulfate synthase 2;Sulfate adenylyltransferase;Adenylyl-sulfate kinase	69.5	4	4	4	7.8	7.8	7.8	0	4.688	22901000	3	20.6804	20.7759
1788	PARD3	Q8TEW0	Partitioning defective 3 homolog	151.42	8	8	8	9.1	9.1	9.1	0	22.356	96610000	11	24.1045	24.0765
1789	PARK7	Q99497	Protein deglycase DJ-1	19.891	8	8	8	52.9	52.9	52.9	0	118.51	221580000	23	24.2507	24.3863
1790	PARP1	P09874	Poly [ADP-ribose] polymerase 1	113.08	44	44	44	48.1	48.1	48.1	0	323.31	4903400000	172	29.426	29.4654
1791	PATL1	Q86TB9	Protein PAT1 homolog 1	86.849	3	3	3	5.6	5.6	5.6	0	10.546	39340000	5	23.0091	23.104
1792	PAWR	Q96IZ0	PRKC apoptosis WT1 regulator protein	36.567	1	1	1	3.8	3.8	3.8	0.0003667	2.3958	6031300	2	21.1552	18.5568
1793	PAXBP1	Q9Y5B6	PAX3- and PAX7-binding protein 1	104.8	1	1	1	1.2	1.2	1.2	0.0010471	2.0286	3459000	1	17.7029	18.5205
1794	PBRM1	Q86U86	Protein polybromo-1	192.95	7	7	7	6	6	6	0	7.1933	35676000	5	22.4379	22.6476
1795	PBX1	P40424	Pre-B-cell leukemia transcription factor 1	46.625	1	1	1	3.3	3.3	3.3	0.0029851	1.6618	1539300	1	18.6183	19.1686
1796	PC	P11498	Pyruvate carboxylase, mitochondrial	129.63	7	7	7	8.2	8.2	8.2	0	15.826	82512000	10	22.92	23.2171
1797	PCBP1	Q15365;P57723	Poly(rC)-binding protein 1	37.497	11	7	7	47.5	34.8	34.8	0	323.31	2262100000	32	27.5754	27.0743
1798	PCBP2	Q15366;P57721	Poly(rC)-binding protein 2	38.58	12	12	8	56.4	56.4	44.1	0	323.31	3464900000	80	28.4507	28.4768
1799	PCCA	P05165	Propionyl-CoA carboxylase alpha chain, mitochondrial	80.058	1	1	1	1.4	1.4	1.4	0.00036206	2.3055	7439200	2	21.5804	18.9865
1800	PCID2	Q5JVF3	PCI domain-containing protein 2	46.029	1	1	1	4	4	4	0	3.6251	6222100	1	19.6105	20.3313
1801	PCK2	Q16822;P35558	Phosphoenolpyruvate carboxykinase [GTP], mitochondrial	70.698	10	10	10	17.2	17.2	17.2	0	20.749	151870000	18	23.6029	23.7076
1802	PCM1	Q15154	Pericentriolar material 1 protein	228.54	1	1	1	0.5	0.5	0.5	0.0010417	1.9958	11021000	2	22.4301	19.9736
1803	PCMT1	P22061	Protein-L-isoaspartate(D-aspartate) O-methyltransferase	24.636	2	2	2	15.4	15.4	15.4	0	17.056	83408000	5	22.9892	22.8479
1804	PCNA	P12004	Proliferating cell nuclear antigen	28.768	9	9	9	42.9	42.9	42.9	0	191.81	768610000	29	26.1591	26.3077
1805	PCYOX1	Q9UHG3	Prenylcysteine oxidase 1	56.639	2	2	2	4.2	4.2	4.2	0.0029752	1.6332	15140000	1	20.6324	20.2051
1806	PCYT1A;PCYT1B	P49585;Q9Y5K3	Choline-phosphate cytidylyltransferase A;Choline-phosphate cytidylyltransferase B	41.731	1	1	1	3.3	3.3	3.3	0.0020422	1.8464	15607000	2	21.1179	18.4887
1807	PDCD10	Q9BUL8	Programmed cell death protein 10	24.701	2	2	2	9.9	9.9	9.9	0	5.4674	54951000	5	24.0946	24.0505
1808	PDCD11	Q14690	Protein RRP5 homolog	208.7	3	3	3	2.4	2.4	2.4	0	6.3056	30615000	8	22.4729	22.7577
1809	PDCD2	Q16342	Programmed cell death protein 2	38.592	2	2	2	7.8	7.8	7.8	0	15.851	49689000	5	21.611	21.8734
1810	PDCD4	Q53EL6	Programmed cell death protein 4	51.735	1	1	1	3.6	3.6	3.6	0.0003951	2.9838	8635800	2	22.3738	18.6689
1811	PDCD6	O75340	Programmed cell death protein 6	21.868	6	6	6	40.8	40.8	40.8	0	17.21	300750000	14	24.4937	24.6014
1812	PDCD6IP	Q8WUM4	Programmed cell death 6-interacting protein	96.022	27	27	27	36.2	36.2	36.2	0	180.81	1022700000	94	27.1397	27.2641
1813	PDCL	Q13371	Phosducin-like protein	34.281	1	1	1	3.7	3.7	3.7	0.0051497	1.4945	4325900	0	18.7445	20.0109
1814	PDCL3	Q9H2J4	Phosducin-like protein 3	27.614	2	2	2	15.9	15.9	15.9	0	17.837	10041000	2	21.557	21.1687
1815	PDE12	Q6L8Q7	2,5-phosphodiesterase 12	67.351	10	10	10	27.6	27.6	27.6	0	49.649	436250000	20	24.0212	24.0188
1816	PDE4DIP	Q5VU43	Myomegalin	265.1	2	2	2	1.2	1.2	1.2	0.00037693	2.6056	5279800	2	18.9654	20.9708
1817	PDHA1	P08559;P29803	Pyruvate dehydrogenase E1 component subunit alpha, somatic form, mitochondrial	43.295	16	16	16	39.2	39.2	39.2	0	90.121	886970000	64	26.0338	25.9516
1818	PDHB	P11177	Pyruvate dehydrogenase E1 component subunit beta, mitochondrial	39.233	15	15	15	47.6	47.6	47.6	0	99.601	1313600000	57	27.119	26.9946
1819	PDHX	O00330	Pyruvate dehydrogenase protein X component, mitochondrial	54.122	1	1	1	2.8	2.8	2.8	0.0023737	1.8205	3138300	1	18.4652	19.192
1820	PDIA6	Q15084	Protein disulfide-isomerase A6	48.121	12	12	12	30	30	30	0	52.034	942870000	35	26.1684	26.0619
1821	PDK1	Q15118	[Pyruvate dehydrogenase (acetyl-transferring)] kinase isozyme 1, mitochondrial	49.244	4	4	4	11.7	11.7	11.7	0	7.9727	12288000	5	21.722	21.9915
1822	PDK3	Q15120	[Pyruvate dehydrogenase (acetyl-transferring)] kinase isozyme 3, mitochondrial	46.938	1	1	1	4.4	4.4	4.4	0	3.4302	16949000	3	20.2384	17.8961
1823	PDLIM5	Q96HC4	PDZ and LIM domain protein 5	63.944	8	8	8	16.8	16.8	16.8	0	18.073	116140000	16	23.394	23.3481
1824	PDLIM7	Q9NR12	PDZ and LIM domain protein 7	49.844	7	7	7	23.4	23.4	23.4	0	26.076	217220000	19	23.3301	23.4176
1825	PDPK1;PDPK2P	O15530;Q6A1A2	3-phosphoinositide-dependent protein kinase 1;Putative 3-phosphoinositide-dependent protein kinase 2	63.151	2	2	2	6.1	6.1	6.1	0	4.4698	32312000	2	19.7294	20.8662
1826	PDPR	Q8NCN5	Pyruvate dehydrogenase phosphatase regulatory subunit, mitochondrial	99.363	1	1	1	2.7	2.7	2.7	0	17.11	9545800	2	18.4956	17.9425
1827	PDS5A	Q29RF7	Sister chromatid cohesion protein PDS5 homolog A	150.83	15	15	14	18.6	18.6	18.1	0	136.86	580600000	41	27.4587	27.4977
1828	PDS5B	Q9NTI5	Sister chromatid cohesion protein PDS5 homolog B	164.67	7	6	6	8.6	8.1	8.1	0	16.806	69588000	10	22.8901	23.0163
1829	PDXDC1	Q6P996;Q6P474	Pyridoxal-dependent decarboxylase domain-containing protein 1	86.706	11	11	11	17.3	17.3	17.3	0	22.293	152880000	21	24.0827	24.3551
1830	PDXP	Q96GD0	Pyridoxal phosphate phosphatase	31.698	3	3	3	14.2	14.2	14.2	0	8.9324	100240000	7	24.7966	24.8824
1831	PEF1	Q9UBV8	Peflin	30.381	1	1	1	10.9	10.9	10.9	0	4.9859	17990000	2	19.914	16.9023
1832	PELO	Q9BRX2	Protein pelota homolog	43.359	7	7	7	26.2	26.2	26.2	0	27.978	150010000	12	24.021	23.9946
1833	PELP1	Q8IZL8	Proline-, glutamic acid- and leucine-rich protein 1	119.7	4	4	4	6.1	6.1	6.1	0	7.6741	48482000	5	23.1601	23.0594
1834	PEO1	Q96RR1	Twinkle protein, mitochondrial	77.153	5	5	5	8.6	8.6	8.6	0	13.197	65676000	7	23.9045	23.5715
1835	PES1	O00541	Pescadillo homolog	68.002	6	6	6	14.5	14.5	14.5	0	61.13	269240000	14	23.6936	23.6296
1836	PET100	P0DJ07	Protein PET100 homolog, mitochondrial	9.1135	1	1	1	13.7	13.7	13.7	0.0003827	2.7195	12919000	2	18.179	22.2226
1837	PEX16	Q9Y5Y5	Peroxisomal membrane protein PEX16	38.628	2	2	2	7.1	7.1	7.1	0.0013675	1.8778	10814000	3	20.0135	20.3741
1838	PEX3	P56589	Peroxisomal biogenesis factor 3	42.139	1	1	1	2.7	2.7	2.7	0	4.8529	15538000	2	20.8684	20.4022
1839	PFAS	O15067	Phosphoribosylformylglycinamidine synthase	144.73	34	34	34	43.8	43.8	43.8	0	323.31	3036500000	121	27.7881	27.6508
1840	PFKL	P17858	ATP-dependent 6-phosphofructokinase, liver type	85.018	14	14	12	21.9	21.9	18.3	0	77.541	422750000	26	25.1822	25.2056
1841	PFKM	P08237	ATP-dependent 6-phosphofructokinase, muscle type	85.182	11	10	10	22.1	20.9	20.9	0	136.59	461720000	21	24.1684	24.233
1842	PFKP	Q01813	ATP-dependent 6-phosphofructokinase, platelet type	85.595	12	10	10	16.7	13.1	13.1	0	18.853	288030000	21	25.2094	24.9527
1843	PFN1	P07737;CON__P02584	Profilin-1	15.054	11	11	11	67.1	67.1	67.1	0	79.643	10128000000	102	28.5249	28.7089
1844	PFN2	P35080	Profilin-2	15.046	5	5	5	40	40	40	0	21.28	168510000	13	23.5853	23.9893
1845	PGAM5	Q96HS1	Serine/threonine-protein phosphatase PGAM5, mitochondrial	32.004	15	15	15	60.2	60.2	60.2	0	48.839	982650000	61	27.4273	27.7584
1846	PGD	P52209	6-phosphogluconate dehydrogenase, decarboxylating	53.139	20	20	20	46.8	46.8	46.8	0	137.39	1748500000	73	27.2876	27.3
1847	PGK1	P00558;P07205	Phosphoglycerate kinase 1	44.614	24	24	24	64.7	64.7	64.7	0	297.47	5710600000	135	28.4023	28.2585
1848	PGLS	O95336	6-phosphogluconolactonase	27.547	8	8	8	52.7	52.7	52.7	0	37.473	457400000	27	24.349	24.0808
1849	PGM1	P36871	Phosphoglucomutase-1	61.448	8	8	8	20.3	20.3	20.3	0	31.418	137340000	14	23.9608	23.9676
1850	PGM2	Q96G03	Phosphoglucomutase-2	68.283	1	1	1	2.3	2.3	2.3	0.0003614	2.2972	7756900	1	18.7905	21.8333
1851	PGM3	O95394	Phosphoacetylglucosamine mutase	59.851	7	7	7	21.2	21.2	21.2	0	21.159	158360000	13	24.4158	24.2516
1852	PGP	A6NDG6	Phosphoglycolate phosphatase	34.006	5	5	5	29.3	29.3	29.3	0	41.039	143910000	17	23.7591	24.2893
1853	PGRMC1	O00264	Membrane-associated progesterone receptor component 1	21.671	12	12	12	45.1	45.1	45.1	0	126.64	420340000	33	25.6176	25.8783
1854	PGRMC2	O15173	Membrane-associated progesterone receptor component 2	23.818	2	2	2	9.9	9.9	9.9	0	4.773	48951000	4	21.8525	22.0088
1855	PHB	P35232	Prohibitin	29.804	14	14	14	65.8	65.8	65.8	0	109.79	1859800000	58	27.1792	27.3122
1856	PHB2	Q99623	Prohibitin-2	33.296	16	16	16	59.9	59.9	59.9	0	85.425	2728600000	68	28.3669	28.5867
1857	PHF10	Q8WUB8	PHD finger protein 10	56.05	2	2	2	5.6	5.6	5.6	0	3.8216	6600500	3	18.1636	19.0684
1858	PHF5A	Q7RTV0	PHD finger-like domain-containing protein 5A	12.405	2	2	2	13.6	13.6	13.6	0.00038986	2.8656	67621000	6	23.038	23.2998
1859	PHF6	Q8IWS0	PHD finger protein 6	41.29	9	9	9	26	26	26	0	267.14	380110000	26	26.2311	26.2726
1860	PHF8	Q9UPP1	Histone lysine demethylase PHF8	117.86	2	2	2	2.2	2.2	2.2	0	4.102	23973000	4	22.7457	18.0676
1861	PHGDH	O43175	D-3-phosphoglycerate dehydrogenase	56.65	20	20	20	46	46	46	0	181.27	6270200000	143	29.1109	29.3723
1862	PHPT1	Q9NRX4	14 kDa phosphohistidine phosphatase	13.832	2	2	2	32.8	32.8	32.8	0	16.496	96827000	7	21.5171	21.662
1863	PI4KA	P42356;Q8N8J0;A4QPH2	Phosphatidylinositol 4-kinase alpha	236.83	4	4	4	2.5	2.5	2.5	0	10.82	25516000	4	21.5876	21.4017
1864	PI4KB	Q9UBF8	Phosphatidylinositol 4-kinase beta	91.378	6	6	6	9.9	9.9	9.9	0	14.393	41495000	10	21.5267	21.3629
1865	PICALM;SNAP91	Q13492;O60641	Phosphatidylinositol-binding clathrin assembly protein;Clathrin coat assembly protein AP180	70.754	1	1	1	1.2	1.2	1.2	0.0045307	1.5226	3202200	2	17.6743	18.9808
1866	PIK3C2A	O00443	Phosphatidylinositol 4-phosphate 3-kinase C2 domain-containing subunit alpha	190.68	7	7	7	5.5	5.5	5.5	0	22.846	70947000	11	24.4434	24.4541
1867	PIK3R1;PIK3R3;PIK3R2	P27986;F6TDL0;Q92569;O00459	Phosphatidylinositol 3-kinase regulatory subunit alpha;Phosphatidylinositol 3-kinase regulatory subunit gamma;Phosphatidylinositol 3-kinase regulatory subunit beta	83.597	2	2	2	4.3	4.3	4.3	0	3.5326	8479100	2	20.5063	18.9572
1868	PIK3R4	Q99570	Phosphoinositide 3-kinase regulatory subunit 4	153.1	5	5	5	4.9	4.9	4.9	0	15.601	72412000	11	23.5938	23.6559
1869	PIKFYVE	Q9Y2I7	1-phosphatidylinositol 3-phosphate 5-kinase	237.13	3	3	3	2.3	2.3	2.3	0	6.0056	21332000	4	22.2578	22.7273
1870	PIN1	Q13526;O15428	Peptidyl-prolyl cis-trans isomerase NIMA-interacting 1	18.243	6	6	6	52.8	52.8	52.8	0	46.399	339500000	19	24.2862	24.0658
1871	PINX1	Q96BK5;A0A0A6YYK5	PIN2/TERF1-interacting telomerase inhibitor 1	37.034	3	3	3	9.8	9.8	9.8	0	4.2657	34783000	4	23.7907	23.7548
1872	PIPSL	A2A3N6;Q99755	Putative PIP5K1A and PSMD4-like protein	95.047	3	1	1	3.8	1.6	1.6	0	3.6389	10906000	2	20.9143	18.2648
1873	PITPNB	P48739	Phosphatidylinositol transfer protein beta isoform	31.54	8	8	8	33.9	33.9	33.9	0	20.972	153840000	18	24.3102	24.504
1874	PITRM1	Q5JRX3	Presequence protease, mitochondrial	117.41	7	7	7	8.2	8.2	8.2	0	9.8064	67854000	11	23.6231	18.4327
1875	PJA1	Q8NG27	E3 ubiquitin-protein ligase Praja-1	71.002	4	4	3	11.4	11.4	7	0	10.965	49896000	7	22.0298	22.059
1876	PJA2	O43164	E3 ubiquitin-protein ligase Praja-2	78.213	3	2	2	8.9	4.9	4.9	0	34.159	38723000	5	22.7665	23.1838
1877	PKM	P14618;P30613	Pyruvate kinase PKM	57.936	35	35	35	63.7	63.7	63.7	0	323.31	18950000000	308	30.0048	29.9598
1878	PKMYT1	Q99640	Membrane-associated tyrosine- and threonine-specific cdc2-inhibitory kinase	54.521	1	1	1	2.6	2.6	2.6	0.0026972	1.7695	11969000	2	18.4196	17.272
1879	PKN1	Q16512	Serine/threonine-protein kinase N1	103.93	2	2	2	4.4	4.4	4.4	0	3.2203	20503000	2	19.4708	18.4819
1880	PKN2	Q16513	Serine/threonine-protein kinase N2	112.03	12	12	12	14.9	14.9	14.9	0	26.416	162210000	25	24.5365	24.5371
1881	PKP4	Q99569	Plakophilin-4	131.87	1	1	1	1.1	1.1	1.1	0.0003876	2.8287	8017900	1	22.199	18.5828
1882	PLAA	Q9Y263	Phospholipase A-2-activating protein	87.156	8	8	8	13.1	13.1	13.1	0	48.749	88839000	14	23.7995	24.1855
1883	PLCG1	P19174	1-phosphatidylinositol 4,5-bisphosphate phosphodiesterase gamma-1	148.53	3	3	3	2.8	2.8	2.8	0	5.3541	30369000	7	23.1417	22.9401
1884	PLEC	Q15149	Plectin	531.78	6	6	6	1.4	1.4	1.4	0	7.1714	13244000	2	19.8884	22.6785
1885	PLK1	P53350	Serine/threonine-protein kinase PLK1	68.254	3	3	3	7	7	7	0.00040209	3.087	59551000	7	21.8337	21.739
1886	PLOD2	O00469	Procollagen-lysine,2-oxoglutarate 5-dioxygenase 2	84.685	1	1	1	1.9	1.9	1.9	0.00070897	2.1388	4493000	1	19.2544	19.9324
1887	PLRG1	O43660	Pleiotropic regulator 1	57.193	4	4	4	9.9	9.9	9.9	0	8.2272	22544000	8	19.8605	20.0076
1888	PLS1;PLS3	Q14651;P13797	Plastin-1;Plastin-3	70.253	1	1	1	1.9	1.9	1.9	0	5.3725	19918000	2	20.3478	17.4623
1889	PM20D2	Q8IYS1	Peptidase M20 domain-containing protein 2	47.776	2	2	2	6.4	6.4	6.4	0	3.6507	14960000	3	20.5985	19.4405
1890	PML	P29590	Protein PML	97.55	3	3	3	5.2	5.2	5.2	0	4.042	28534000	6	22.3452	22.5387
1891	PMM2	O15305;Q92871	Phosphomannomutase 2	28.082	6	6	6	24.8	24.8	24.8	0	12.785	115840000	12	24.1009	23.9113
1892	PMPCA	Q10713	Mitochondrial-processing peptidase subunit alpha	58.252	7	7	7	17.5	17.5	17.5	0	14.264	82947000	14	24.1239	24.3427
1893	PMPCB	O75439	Mitochondrial-processing peptidase subunit beta	54.366	11	11	10	29.9	29.9	28.4	0	86.221	627480000	33	25.7399	25.8169
1894	PMS1	P54277	PMS1 protein homolog 1	105.83	1	1	1	1.2	1.2	1.2	0.00071352	2.181	4959200	1	21.1592	18.7174
1895	PMVK	Q15126	Phosphomevalonate kinase	21.995	4	4	4	21.9	21.9	21.9	0	37.041	110630000	10	22.9149	23.1582
1896	PNN	Q9H307	Pinin	81.627	17	17	17	26.6	26.6	26.6	0	46.538	404280000	38	26.6108	26.4559
1897	PNO1	Q9NRX1	RNA-binding protein PNO1	27.924	5	5	5	26.6	26.6	26.6	0	19.27	106450000	10	24.6442	24.7905
1898	PNP	P00491	Purine nucleoside phosphorylase	32.118	8	8	8	39.1	39.1	39.1	0	34.021	200970000	12	23.5768	23.6648
1899	POGK	Q9P215	Pogo transposable element with KRAB domain	69.443	1	1	1	1.8	1.8	1.8	0.0023657	1.7916	3059400	1	21.5448	19.312
1900	POGZ	Q7Z3K3	Pogo transposable element with ZNF domain	155.34	3	3	3	2.7	2.7	2.7	0.0003785	2.6267	11490000	4	19.5924	19.6502
1901	POLA1	P09884	DNA polymerase alpha catalytic subunit	165.91	16	16	16	12.7	12.7	12.7	0	56.741	314910000	22	26.0043	25.8333
1902	POLA2	Q14181	DNA polymerase alpha subunit B	65.947	3	3	3	4.3	4.3	4.3	0	4.0063	35935000	4	21.522	21.3698
1903	POLD1	P28340;M0R3H8	DNA polymerase delta catalytic subunit	123.63	21	21	21	26.4	26.4	26.4	0	116.22	518470000	40	25.7772	25.7549
1904	POLD2	P49005	DNA polymerase delta subunit 2	51.289	6	6	6	18.6	18.6	18.6	0	31.061	117820000	5	22.6603	22.4381
1905	POLD3	Q15054	DNA polymerase delta subunit 3	51.4	4	4	4	11.4	11.4	11.4	0	13.311	72101000	8	24.306	24.5227
1906	POLDIP2	Q9Y2S7	Polymerase delta-interacting protein 2	42.033	3	3	3	9.5	9.5	9.5	0.0007148	2.2089	13257000	3	20.9142	20.8656
1907	POLDIP3	Q9BY77	Polymerase delta-interacting protein 3	46.089	9	9	9	35.9	35.9	35.9	0	50.47	239240000	25	24.0636	23.8216
1908	POLE	Q07864	DNA polymerase epsilon catalytic subunit A	261.51	4	4	4	2.8	2.8	2.8	0	3.9948	31999000	3	18.8556	20.9944
1909	POLE4	Q9NR33	DNA polymerase epsilon subunit 4	12.209	1	1	1	10.3	10.3	10.3	0	3.6023	11094000	2	20.2995	18.5237
1910	POLG	P54098	DNA polymerase subunit gamma-1	139.56	1	1	1	1	1	1	0.0026846	1.7466	3854900	2	16.9823	17.4739
1911	POLG2	Q9UHN1	DNA polymerase subunit gamma-2, mitochondrial	54.91	1	1	1	3.5	3.5	3.5	0.0078518	1.3288	4439100000	19	27.9449	19.2301
1912	POLR1A	O95602	DNA-directed RNA polymerase I subunit RPA1	194.81	21	21	21	17.5	17.5	17.5	0	62.905	373340000	35	26.1342	25.8685
1913	POLR1B	Q9H9Y6	DNA-directed RNA polymerase I subunit RPA2	128.23	7	7	7	6.9	6.9	6.9	0	18.254	147390000	9	23.2957	23.4151
1914	POLR1C	O15160	DNA-directed RNA polymerases I and III subunit RPAC1	39.249	9	9	9	39.9	39.9	39.9	0	58.142	431300000	20	25.331	25.4548
1915	POLR1E	Q9GZS1	DNA-directed RNA polymerase I subunit RPA49	53.961	2	2	2	3.5	3.5	3.5	0.0026783	1.7399	39389000	4	23.5485	23.5413
1916	POLR2A	P24928	DNA-directed RNA polymerase II subunit RPB1	217.17	13	13	13	8.2	8.2	8.2	0	21.518	151000000	19	24.2377	23.8971
1917	POLR2B	P30876	DNA-directed RNA polymerase II subunit RPB2	133.9	18	18	18	20.3	20.3	20.3	0	70.341	494560000	45	26.3901	26.4884
1918	POLR2C	P19387	DNA-directed RNA polymerase II subunit RPB3	31.441	7	7	7	45.5	45.5	45.5	0	31.755	288170000	17	24.8918	25.0038
1919	POLR2E	P19388	DNA-directed RNA polymerases I, II, and III subunit RPABC1	24.551	7	7	7	46.2	46.2	46.2	0	31.84	120550000	15	23.8778	24.0264
1920	POLR2H	P52434	DNA-directed RNA polymerases I, II, and III subunit RPABC3	17.143	7	7	7	43.3	43.3	43.3	0	38.166	405610000	20	24.8679	25.2711
1921	POLR2I	P36954	DNA-directed RNA polymerase II subunit RPB9	14.523	1	1	1	18.4	18.4	18.4	0	11.14	62786000	4	21.6982	18.3694
1922	POLR2L	P62875	DNA-directed RNA polymerases I, II, and III subunit RPABC5	7.645	3	3	3	74.6	74.6	74.6	0	8.2802	109060000	7	22.1346	21.8954
1923	POLR3A	O14802	DNA-directed RNA polymerase III subunit RPC1	155.64	6	6	6	7.1	7.1	7.1	0	27.241	70206000	9	22.8256	22.5842
1924	POLR3C	Q9BUI4	DNA-directed RNA polymerase III subunit RPC3	60.611	5	5	5	15.9	15.9	15.9	0	10.951	45550000	8	21.9445	22.3334
1925	POLR3D	P05423	DNA-directed RNA polymerase III subunit RPC4	44.395	2	2	2	5.8	5.8	5.8	0.00038139	2.6885	8718400	3	20.1454	20.0733
1926	POLR3E	Q9NVU0	DNA-directed RNA polymerase III subunit RPC5	79.897	1	1	1	2.1	2.1	2.1	0.0003882	2.8404	5140100	1	18.5926	19.5059
1927	POLR3H	Q9Y535	DNA-directed RNA polymerase III subunit RPC8	22.918	1	1	1	14.2	14.2	14.2	0	8.2965	8255700	1	19.8192	18.7217
1928	POLRMT	O00411	DNA-directed RNA polymerase, mitochondrial	138.62	9	9	9	12.6	12.6	12.6	0	47.716	237660000	17	23.591	23.6741
1929	POM121C;POMZP3	A8CG34;Q6PJE2;A6NF01	Nuclear envelope pore membrane protein POM 121C;POM121 and ZP3 fusion protein	125.09	3	3	1	3.4	3.4	2	0	14.2	30461000	4	22.1596	21.1771
1930	PON2	Q15165	Serum paraoxonase/arylesterase 2	39.38	1	1	1	2.5	2.5	2.5	0.0045147	1.5085	3523800	1	17.6717	19.7092
1931	POP1	Q99575	Ribonucleases P/MRP protein subunit POP1	114.71	3	3	3	4.4	4.4	4.4	0	5.6561	49156000	6	23.775	23.7028
1932	POR	P16435	NADPH--cytochrome P450 reductase	76.689	4	4	4	7.4	7.4	7.4	0	19.966	24717000	4	20.315	19.934
1933	PPAPDC2	Q8IY26	Presqualene diphosphate phosphatase	32.193	1	1	1	10.5	10.5	10.5	0.0013746	1.9285	5385500	2	17.4515	18.4583
1934	PPFIA1	Q13136;O75335;O75334	Liprin-alpha-1	135.78	10	10	8	12.2	12.2	10.8	0	26.005	86816000	21	24.3596	24.3421
1935	PPFIBP1	Q86W92	Liprin-beta-1	114.02	1	1	1	2.1	2.1	2.1	0.00037453	2.5632	4596300	1	18.8427	18.3612
1936	PPHLN1	Q8NEY8	Periphilin-1	52.736	3	3	3	8.3	8.3	8.3	0	17.584	218120000	14	24.1486	24.1223
1937	PPIA	P62937;P0DN26;A0A0B4J2A2;A0A075B767;A0A075B759;Q9Y536;F5H284;P0DN37	Peptidyl-prolyl cis-trans isomerase A;Peptidyl-prolyl cis-trans isomerase A, N-terminally processed	18.012	12	12	12	71.5	71.5	71.5	0	189.02	8796500000	126	28.6029	28.6323
1938	PPID	Q08752	Peptidyl-prolyl cis-trans isomerase D	40.763	6	6	6	22.2	22.2	22.2	0	22.068	187190000	11	24.7056	25.0641
1939	PPIG	Q13427	Peptidyl-prolyl cis-trans isomerase G	88.616	1	1	1	1.6	1.6	1.6	0.007879	1.3402	5064100	1	20.3364	18.367
1940	PPIH	O43447	Peptidyl-prolyl cis-trans isomerase H	19.208	6	6	6	52.5	52.5	52.5	0	23.471	204780000	11	23.8937	24.1361
1941	PPIL1	Q9Y3C6	Peptidyl-prolyl cis-trans isomerase-like 1	18.237	1	1	1	10.2	10.2	10.2	0.00037965	2.6452	23190000	3	21.3166	18.4511
1942	PPIL2	Q13356	Peptidyl-prolyl cis-trans isomerase-like 2	58.823	7	7	7	15.6	15.6	15.6	0	34.588	67438000	11	22.3781	22.3974
1943	PPIL3	Q9H2H8	Peptidyl-prolyl cis-trans isomerase-like 3	18.154	1	1	1	11.8	11.8	11.8	0.001385	1.9808	3480200	1	19.1305	19.4419
1944	PPIL4	Q8WUA2	Peptidyl-prolyl cis-trans isomerase-like 4	57.224	4	4	4	11	11	11	0	9.6648	115240000	10	25.4845	25.1999
1945	PPM1A	P35813;O75688	Protein phosphatase 1A	42.447	4	4	4	13.1	13.1	13.1	0	8.1509	29499000	4	21.8922	21.273
1946	PPM1E	Q8WY54	Protein phosphatase 1E	83.951	1	1	1	2	2	2	0.00038432	2.7548	4863000	2	21.4124	19.1077
1947	PPM1F	P49593	Protein phosphatase 1F	49.83	3	3	3	8.6	8.6	8.6	0	3.5214	18190000	5	20.835	20.5286
1948	PPM1G	O15355	Protein phosphatase 1G	59.271	4	4	4	10.6	10.6	10.6	0	3.5833	15214000	1	22.4405	19.7568
1949	PPME1	Q9Y570	Protein phosphatase methylesterase 1	42.315	7	7	7	21.2	21.2	21.2	0	85.872	436670000	20	24.3427	24.2044
1950	PPP1CA	P62136	Serine/threonine-protein phosphatase PP1-alpha catalytic subunit	37.512	10	10	5	29.7	29.7	16.1	0	133.2	1004900000	42	26.4903	26.4468
1951	PPP1CB	P62140	Serine/threonine-protein phosphatase PP1-beta catalytic subunit	37.186	9	4	4	26.3	12.5	12.5	0	21.186	306590000	16	24.4205	24.9206
1952	PPP1CC	P36873	Serine/threonine-protein phosphatase PP1-gamma catalytic subunit	36.983	7	2	2	21.4	7.4	7.4	0	93.853	425700000	14	26.1537	26.2783
1953	PPP1R10	Q96QC0	Serine/threonine-protein phosphatase 1 regulatory subunit 10	99.057	2	2	2	2.9	2.9	2.9	0	3.6796	11286000	3	18.3714	22.2255
1954	PPP1R12A	O14974;O60237	Protein phosphatase 1 regulatory subunit 12A	115.28	12	12	12	10.6	10.6	10.6	0	33.414	109060000	15	24.6924	24.8658
1955	PPP1R12C	Q9BZL4	Protein phosphatase 1 regulatory subunit 12C	84.88	1	1	1	1.7	1.7	1.7	0.00039093	2.8943	5381700	1	18.089	21.3522
1956	PPP1R8	Q12972	Nuclear inhibitor of protein phosphatase 1;Activator of RNA decay	38.478	9	9	9	35.6	35.6	35.6	0	23.088	199030000	18	25.2097	25.0779
1957	PPP1R9B	Q96SB3	Neurabin-2	89.191	1	1	1	1.6	1.6	1.6	0.00039841	3.0422	9566600	2	21.6018	18.7765
1958	PPP2CA;PPP2CB	P67775;P62714	Serine/threonine-protein phosphatase 2A catalytic subunit alpha isoform;Serine/threonine-protein phosphatase 2A catalytic subunit beta isoform	35.594	1	1	1	8.1	8.1	8.1	0.0096064	1.2542	45611000	1	18.3374	21.0918
1959	PPP2R1A	P30153	Serine/threonine-protein phosphatase 2A 65 kDa regulatory subunit A alpha isoform	65.308	18	18	16	38	38	34.6	0	113.16	1220000000	53	26.5715	26.7347
1960	PPP2R1B	P30154	Serine/threonine-protein phosphatase 2A 65 kDa regulatory subunit A beta isoform	66.213	4	2	2	7.5	4.2	4.2	0	4.0079	11006000	3	21.6823	22.0329
1961	PPP2R5C	Q13362	Serine/threonine-protein phosphatase 2A 56 kDa regulatory subunit gamma isoform	61.06	2	1	0	5.3	3.2	0	0	5.9516	10194000	1	18.9491	17.8282
1962	PPP2R5D	Q14738	Serine/threonine-protein phosphatase 2A 56 kDa regulatory subunit delta isoform	69.991	5	5	4	9.8	9.8	8	0	9.7634	51751000	8	22.2184	22.3791
1963	PPP3CA	Q08209	Serine/threonine-protein phosphatase 2B catalytic subunit alpha isoform	58.687	1	1	1	1.5	1.5	1.5	0.0050939	1.4198	2919600	1	20.4861	19.1044
1964	PPP4C	P60510	Serine/threonine-protein phosphatase 4 catalytic subunit	35.08	2	2	2	6.2	6.2	6.2	0	5.8667	33112000	8	23.7133	23.5136
1965	PPP4R2	Q9NY27	Serine/threonine-protein phosphatase 4 regulatory subunit 2	46.898	2	2	2	12.2	12.2	12.2	0	7.4556	14922000	3	22.1727	22.8125
1966	PPP6C	O00743	Serine/threonine-protein phosphatase 6 catalytic subunit;Serine/threonine-protein phosphatase 6 catalytic subunit, N-terminally processed	35.144	3	3	3	11.1	11.1	11.1	0	6.8423	134840000	8	23.2895	23.3166
1967	PPP6R1	Q9UPN7	Serine/threonine-protein phosphatase 6 regulatory subunit 1	96.723	1	1	1	2.2	2.2	2.2	0	9.6444	25830000	2	19.5007	20.0736
1968	PPP6R2	O75170	Serine/threonine-protein phosphatase 6 regulatory subunit 2	104.94	3	3	3	4.5	4.5	4.5	0	4.5071	24939000	3	23.2073	23.2956
1969	PPP6R3	Q5H9R7	Serine/threonine-protein phosphatase 6 regulatory subunit 3	97.668	10	10	10	14.9	14.9	14.9	0	55.511	202960000	18	24.8559	24.6928
1970	PRC1	O43663	Protein regulator of cytokinesis 1	71.606	1	1	1	1.1	1.1	1.1	0.0029693	1.6218	48199000	2	21.2722	18.8603
1971	PRCC	Q92733	Proline-rich protein PRCC	52.417	1	1	1	1.8	1.8	1.8	0.0051249	1.4682	5658700	2	18.4489	19.0834
1972	PRDX1	Q06830	Peroxiredoxin-1	22.11	7	7	4	31.2	31.2	19.6	0	16.349	580050000	28	25.1269	25.1198
1973	PRDX2	P32119	Peroxiredoxin-2	21.892	5	4	4	28.3	22.7	22.7	0	6.2303	85211000	9	23.1969	22.8286
1974	PRDX3	P30048	Thioredoxin-dependent peroxide reductase, mitochondrial	27.692	3	3	3	13.3	13.3	13.3	0	4.8977	42597000	4	20.7145	21.1086
1975	PREB	Q9HCU5	Prolactin regulatory element-binding protein	45.468	4	4	4	14.4	14.4	14.4	0	9.1088	95871000	9	23.0815	23.0668
1976	PREP	P48147	Prolyl endopeptidase	80.699	3	3	3	4.8	4.8	4.8	0	3.2944	16259000	2	21.124	19.2531
1977	PREPL	Q4J6C6	Prolyl endopeptidase-like	83.926	4	4	4	7.8	7.8	7.8	0	8.0364	53684000	7	22.1634	22.2274
1978	PRIM1	P49642	DNA primase small subunit	49.901	6	6	6	18.3	18.3	18.3	0	16.225	72751000	8	24.3486	24.3294
1979	PRIM2	P49643	DNA primase large subunit	58.805	13	13	13	34.4	34.4	34.4	0	36.78	226350000	25	24.652	24.7746
1980	PRKAG1	P54619	5-AMP-activated protein kinase subunit gamma-1	37.579	1	1	1	5.7	5.7	5.7	0.00039324	2.9477	5770300	2	18.9411	17.9393
1981	PRKAR1A	P10644	cAMP-dependent protein kinase type I-alpha regulatory subunit;cAMP-dependent protein kinase type I-alpha regulatory subunit, N-terminally processed	42.981	7	7	7	26.8	26.8	26.8	0	15.631	75372000	7	24.0821	23.9528
1982	PRKAR2A	P13861	cAMP-dependent protein kinase type II-alpha regulatory subunit	45.518	12	12	12	41.1	41.1	41.1	0	90.751	337430000	31	25.5317	25.66
1983	PRKAR2B	P31323	cAMP-dependent protein kinase type II-beta regulatory subunit	46.302	2	2	2	9.8	9.8	9.8	0	4.317	11606000	3	20.5996	19.3787
1984	PRKCD	Q05655	Protein kinase C delta type;Protein kinase C delta type regulatory subunit;Protein kinase C delta type catalytic subunit	77.504	2	2	2	2.7	2.7	2.7	0	4.5485	23532000	2	22.4767	19.9775
1985	PRKCI	P41743	Protein kinase C iota type	68.262	5	5	5	14.8	14.8	14.8	0	37.403	90982000	7	22.4786	22.8697
1986	PRKDC	P78527	DNA-dependent protein kinase catalytic subunit	469.08	120	120	120	33.1	33.1	33.1	0	323.31	7111400000	372	29.0343	29.0809
1987	PRKRA	O75569	Interferon-inducible double-stranded RNA-dependent protein kinase activator A	34.404	5	5	5	23.3	23.3	23.3	0	22.425	125530000	10	23.0049	23.1094
1988	PRKRIR	O43422	52 kDa repressor of the inhibitor of the protein kinase	87.703	2	2	2	3	3	3	0	4.6839	15677000	4	23.1126	22.829
1989	PRMT1	Q99873;Q9NR22	Protein arginine N-methyltransferase 1	42.461	7	7	7	20.2	20.2	20.2	0	19.5	191010000	22	24.9544	24.9207
1990	PRMT3	O60678	Protein arginine N-methyltransferase 3	59.902	8	8	8	16.8	16.8	16.8	0	15.593	217130000	17	24.0187	24.0334
1991	PRMT5	O14744	Protein arginine N-methyltransferase 5;Protein arginine N-methyltransferase 5, N-terminally processed	72.683	10	10	10	22	22	22	0	32.668	217780000	23	25.2389	25.0357
1992	PRMT6	Q96LA8	Protein arginine N-methyltransferase 6	41.937	2	2	2	9.6	9.6	9.6	0	4.0744	10671000	3	22.0816	22.1015
1993	PRMT7	Q9NVM4	Protein arginine N-methyltransferase 7	78.458	3	3	3	5.1	5.1	5.1	0	3.4759	17031000	0	18.7947	22.5899
1994	PRPF19	Q9UMS4	Pre-mRNA-processing factor 19	55.18	11	11	11	28.4	28.4	28.4	0	79.454	1429000000	55	26.4735	26.6077
1995	PRPF3	O43395	U4/U6 small nuclear ribonucleoprotein Prp3	77.528	15	15	15	32.5	32.5	32.5	0	35.79	381940000	37	25.7015	25.766
1996	PRPF31	Q8WWY3	U4/U6 small nuclear ribonucleoprotein Prp31	55.455	9	9	9	24.8	24.8	24.8	0	29.79	318950000	21	24.9266	24.8481
1997	PRPF38A	Q8NAV1	Pre-mRNA-splicing factor 38A	37.476	2	2	2	9.9	9.9	9.9	0.0017036	1.8605	32875000	1	20.6962	20.1086
[truncated: 1,116 more rows]
