# Supplementary material for: EDF1 coordinates cellular responses to ribosome collisions
Source: eLife. 2020 Aug 3;9:e58828. doi: 10.7554/eLife.58828 (PMC7486125; doi:10.7554/eLife.58828)
Supplement: Figure 5—source data 2. [file elife-58828-fig5-data2.xlsx]

## Sheet: Fig5-source-data-2
Sinha N. et al. (2020)
Figure 5-source data 2: Related to Figure 5B

## Sheet: Sheet2
BioID analyses of BirA*-EDF1 with or without doxycycline induction for 16 hours. Searched with Andromeda; analyzed with Maxquant (1.6.7.0) and and Perseus (1.6.7.0)
Related to Figure 5B
Rank	Gene symbol	Protein IDs	Protein Names	Peptides	MS/MS count	Log2(LFQ BioID_birA_EDF1_no_Dox_1)	Log2(LFQ BioID_birA_EDF1_no_Dox_2	Log2(LFQ BioID_birA_EDF1_no_Dox_3)	Log2(LFQ BioID_birA_EDF1_Dox_1)	Log2(LFQ BioID_birA_EDF1_Dox_2)	Log2(LFQ BioID_birA_EDF1_Dox_3)	Log2({LFQ-EDF1_dox}/{LFQ-EDF1_no_dox})	-Log10 p-value
1	AAAS	Q9NRG9	Aladin	6	37	26.7577	27.5364	27.1649	25.918	26.0912	25.9435	-1.16878	2.14213
2	AAGAB	Q6PD74	Alpha- and gamma-adaptin-binding protein p34	2	8	27.0872	27.4742	27.3939	24.3622	24.3977	23.5651	-3.21012	3.38528
3	AAK1	Q2M2I8	AP2-associated protein kinase 1	6	40	23.7924	23.0987	24.8868	27.6232	27.5223	27.6792	3.68226	2.67005
4	AAR2	Q9Y312	Protein AAR2 homolog	3	18	24.282	24.3378	23.5336	25.6566	25.4578	25.2335	1.39818	2.08772
5	AARS	P49588	Alanine--tRNA ligase, cytoplasmic	18	67	22.8281	27.1633	27.1118	27.6773	27.7102	27.4792	1.92119	0.597583
6	AARS2	Q5JTZ9	Alanine--tRNA ligase, mitochondrial	14	72	27.7037	27.9617	27.9576	26.818	27.1438	27.0324	-0.876256	2.62097
7	AARSD1	Q9BTE6	Alanyl-tRNA editing protein Aarsd1	3	11	24.8422	24.9404	25.0542	24.0576	23.0687	24	-1.23685	1.71548
8	ABCE1	P61221	ATP-binding cassette sub-family E member 1	19	141	29.1113	29.1782	29.3899	29.3272	29.6536	29.304	0.201823	0.648372
9	ABCF1	Q8NE71	ATP-binding cassette sub-family F member 1	18	102	26.1271	24.2042	24.6993	29.095	29.5347	29.0673	4.22213	2.67864
10	ABCF2	Q9UG63	ATP-binding cassette sub-family F member 2	17	83	28.7612	28.8492	28.645	28.6572	28.7105	28.587	-0.100208	0.65629
11	ABCF3	Q9NUQ8	ATP-binding cassette sub-family F member 3	2	8	23.2024	24.1683	23.5042	24.6417	24.7789	24.5511	1.03226	1.6135
12	ABI1	Q8IZP0	Abl interactor 1	5	28	25.4019	25.6099	26.1756	26.4786	26.0487	26.1907	0.510166	0.903292
13	ABL2	P42684	Abelson tyrosine-protein kinase 2	3	10	23.4402	23.5031	25.3716	25.4808	25.3282	25.3376	1.27727	0.940007
14	ABLIM1	O14639	Actin-binding LIM protein 1	6	17	24.5387	24.2606	24.5982	26.5239	25.9352	26.4319	1.8312	3.01807
15	ABR	Q12979	Active breakpoint cluster region-related protein	3	17	24.8707	25.2231	25.3554	26.1391	26.7155	26.6512	1.3522	2.35972
16	ABT1	Q9ULW3	Activator of basal transcription 1	4	25	23.7991	23.5828	22.7384	27.798	27.5144	27.5215	4.23787	3.63906
17	ACAA2	P42765	3-ketoacyl-CoA thiolase, mitochondrial	25	281	30.4219	30.3225	30.6212	30.1214	30.2307	30.1164	-0.299043	1.45544
18	ACACA	Q13085	Acetyl-CoA carboxylase 1;Biotin carboxylase	223	3304	37.2646	37.6398	37.6553	33.0693	33.3252	33.2029	-4.32079	5.09161
19	ACACB	O00763	Acetyl-CoA carboxylase 2;Biotin carboxylase	62	218	30.7781	31.5415	31.2687	25.2675	26.308	24.9444	-5.68948	3.58008
20	ACADM	P11310	Medium-chain specific acyl-CoA dehydrogenase, mitochondrial	17	162	29.5569	29.9001	29.8891	29.1315	29.2725	29.0606	-0.627165	2.08619
21	ACADSB	P45954	Short/branched chain specific acyl-CoA dehydrogenase, mitochondrial	3	22	26.056	26.3263	26.8091	24.157	25.6893	25.2903	-1.35158	1.24653
22	ACAT1	P24752	Acetyl-CoA acetyltransferase, mitochondrial	20	270	30.8613	31.1949	31.2701	30.7474	30.7988	30.8722	-0.302644	1.08814
23	ACAT2	Q9BWD1	Acetyl-CoA acetyltransferase, cytosolic	19	195	30.2303	30.2129	30.2952	29.9248	29.797	29.7919	-0.408239	2.90658
24	ACBD3	Q9H3P7	Golgi resident protein GCP60	7	54	27.2466	27.6058	27.9407	27.6146	27.9025	27.7466	0.156895	0.292739
25	ACIN1	Q9UKV3	Apoptotic chromatin condensation inducer in the nucleus	43	345	30.123	27.6002	27.928	31.5434	30.994	31.3687	2.75165	1.56573
26	ACLY	P53396	ATP-citrate synthase	56	612	31.8946	32.3242	32.2699	31.8766	31.9899	31.8161	-0.2687	0.866135
27	ACO2	Q99798	Aconitate hydratase, mitochondrial	9	39	27.1052	27.1746	27.5791	26.9844	26.8182	26.9651	-0.363717	1.09056
28	ACOT1;ACOT2	Q86TX2;P49753	Acyl-coenzyme A thioesterase 1;Acyl-coenzyme A thioesterase 2, mitochondrial	10	72	27.606	27.9647	27.9019	27.7607	28.0304	27.9838	0.100771	0.295117
29	ACOT7	O00154	Cytosolic acyl coenzyme A thioester hydrolase	15	185	30.1655	30.5976	30.4399	29.4596	29.7491	29.4563	-0.845983	2.21948
30	ACP1	P24666	Low molecular weight phosphotyrosine protein phosphatase	11	51	28.8142	29.1235	29.0047	27.9083	27.9689	27.8648	-1.06677	3.44603
31	ACSL3	O95573	Long-chain-fatty-acid--CoA ligase 3	10	75	28.695	29.026	28.6319	27.3666	27.7888	27.684	-1.17117	2.57509
32	ACSL4	O60488	Long-chain-fatty-acid--CoA ligase 4	5	8	25.9019	25.0815	26.114	25.0748	25.7944	25.1655	-0.354249	0.384499
33	ACTA1;ACTC1;ACTG2;ACTA2	P68133;P68032;P63267;P62736	Actin, alpha skeletal muscle;Actin, alpha cardiac muscle 1;Actin, gamma-enteric smooth muscle;Actin, aortic smooth muscle	21	99	31.2142	29.6801	30.1757	29.6786	30.3255	30.4476	-0.20612	0.150349
34	ACTB	P60709	Actin, cytoplasmic 1;Actin, cytoplasmic 1, N-terminally processed	28	759	34.5229	33.7497	33.7884	33.0282	33.3256	33.2437	-0.821142	1.43197
35	ACTN4	O43707	Alpha-actinin-4	39	241	31.9631	30.4152	30.4156	28.8883	29.0982	28.98	-1.94244	1.69608
36	ACTR10	Q9NZ32	Actin-related protein 10	2	10	25.1695	25.1412	24.3653	24.648	24.6161	24.4438	-0.322685	0.523455
37	ACTR1A	P61163	Alpha-centractin	14	147	29.96	29.9871	30.184	29.0917	29.2817	29.1622	-0.865177	3.18841
38	ACTR2	P61160	Actin-related protein 2	12	113	28.7561	29.0798	28.8165	29.0047	29.2828	29.2124	0.282482	1.02182
39	ACTR3	P61158	Actin-related protein 3	18	133	29.4961	30.1034	29.8164	28.6319	28.9954	28.7212	-1.02246	2.10906
40	ADAR	P55265	Double-stranded RNA-specific adenosine deaminase	34	334	30.4887	30.3272	30.4386	30.2694	30.3806	30.3802	-0.0747655	0.54757
41	ADCK3	Q8NI60	Atypical kinase ADCK3, mitochondrial	5	40	26.9213	26.759	27.0549	26.0231	26.2747	26.5529	-0.628139	1.63642
42	ADD1	P35611	Alpha-adducin	15	90	27.4845	26.8364	28.0676	29.7265	29.8086	29.8752	2.34057	2.54767
43	ADD3	Q9UEY8	Gamma-adducin	13	102	24.4017	24.621	25.1747	29.756	29.7955	29.8891	5.08106	4.57952
44	ADNP	Q9H2P0	Activity-dependent neuroprotector homeobox protein	22	160	28.5289	28.63	28.6654	29.769	29.5943	29.635	1.05799	4.03308
45	ADRBK1	P25098	Beta-adrenergic receptor kinase 1	5	7	25.0499	25.0942	25.4149	25.2475	25.2358	25.3232	0.0824687	0.280769
46	ADRM1	Q16186	Proteasomal ubiquitin receptor ADRM1	2	17	27.6099	27.959	27.8276	28.3363	27.9889	28.1257	0.35148	1.15226
47	ADSL	P30566	Adenylosuccinate lyase	15	116	29.5306	29.6198	29.5806	29.1462	29.3747	29.1584	-0.350599	1.95285
48	ADSS	P30520	Adenylosuccinate synthetase isozyme 2	19	177	29.8094	30.1854	30.2847	30.5018	30.0606	30.1408	0.141209	0.287392
49	AFF4	Q9UHB7	AF4/FMR2 family member 4	7	39	23.7354	23.9559	24.3218	27.6792	27.5134	27.7109	3.63011	4.4319
50	AFG3L2	Q9Y4W6	AFG3-like protein 2	15	46	27.4597	28.0412	27.7813	27.5205	27.7277	27.3226	-0.237139	0.506699
51	AFTPH	Q6ULP2	Aftiphilin	6	23	23.0723	24.3199	22.5497	26.9213	26.7574	27.024	3.58694	2.60188
52	AGFG1	P52594	Arf-GAP domain and FG repeat-containing protein 1	7	42	26.4944	26.9697	27.6195	28.066	28.0329	27.8623	0.959217	1.35017
53	AGK	Q53H12	Acylglycerol kinase, mitochondrial	4	17	24.9284	25.5776	25.1862	25.0456	24.9069	25.0081	-0.243837	0.559856
54	AGL	P35573	Glycogen debranching enzyme;4-alpha-glucanotransferase;Amylo-alpha-1,6-glucosidase	11	39	27.0498	27.4639	27.3009	26.5106	26.7808	26.564	-0.65305	1.95607
55	AGPS	O00116	Alkyldihydroxyacetonephosphate synthase, peroxisomal	13	71	28.6598	28.9663	28.7764	27.7361	27.705	27.8538	-1.03587	3.30691
56	AGTPBP1	Q9UPW5	Cytosolic carboxypeptidase 1	3	12	24.4776	24.3453	24.1838	25.0557	25.1448	24.8197	0.671188	2.18751
57	AHCY	P23526	Adenosylhomocysteinase	21	290	30.9824	31.3344	31.2771	30.9995	31.2236	31.1915	-0.0597693	0.174883
58	AHCYL1	O43865	Putative adenosylhomocysteinase 2	9	73	26.8078	27.4491	27.2712	27.5746	27.5236	27.5278	0.365964	0.889178
59	AHNAK	Q09666	Neuroblast differentiation-associated protein AHNAK	199	1325	27.9788	27.2462	27.4009	33.3091	33.3569	33.3685	5.80288	4.88216
60	AHNAK2	Q8IVF2	Protein AHNAK2	3	12	24.0156	23.2888	24.4104	25.1292	25.3174	24.9986	1.24345	1.65967
61	AHSA1	O95433	Activator of 90 kDa heat shock protein ATPase homolog 1	9	65	28.599	28.9093	28.6895	27.7492	28.2664	28.0034	-0.726262	1.84217
62	AIFM1	O95831	Apoptosis-inducing factor 1, mitochondrial	15	87	28.0719	28.262	28.4761	28.7352	28.7227	28.7193	0.45572	1.75619
63	AIMP1	Q12904	Aminoacyl tRNA synthase complex-interacting multifunctional protein 1;Endothelial monocyte-activating polypeptide 2	16	183	29.2921	29.328	29.6474	29.8128	29.8877	29.8647	0.432576	1.70348
64	AIMP2	Q13155	Aminoacyl tRNA synthase complex-interacting multifunctional protein 2	6	51	27.0119	27.337	27.4823	28.5226	28.5511	28.4263	1.22293	2.97605
65	AIP	O00170	AH receptor-interacting protein	6	30	26.8225	26.9058	27.2402	26.794	26.5086	26.8772	-0.26287	0.70769
66	AK4	P27144	Adenylate kinase 4, mitochondrial	7	45	27.8744	27.9346	28.2767	26.803	27.436	27.0327	-0.937971	1.86266
67	AK6	Q9Y3D8	Adenylate kinase isoenzyme 6	4	34	27.1731	27.0317	27.0681	27.0501	26.9542	26.7447	-0.174672	0.811226
68	AKAP1	Q92667	A-kinase anchor protein 1, mitochondrial	11	59	22.7627	25.8347	25.5687	28.741	28.9402	29.006	4.17373	1.87508
69	AKAP12	Q02952	A-kinase anchor protein 12	14	51	23.8765	24.6353	24.3874	28.0158	28.3114	28.3363	3.92144	4.04343
70	AKAP2	Q9Y2D5	A-kinase anchor protein 2	9	38	24.3134	24.0113	24.5292	27.5767	27.7594	27.8053	3.42917	4.49298
71	AKAP8	O43823	A-kinase anchor protein 8	5	19	26.6469	26.4072	27.0485	26.3363	26.0434	26.1633	-0.519877	1.18924
72	AKR1A1	P14550	Alcohol dehydrogenase [NADP(+)]	3	15	26.2885	26.3969	25.8882	25.7633	25.5682	25.5019	-0.580048	1.54169
73	AKR1B1	P15121	Aldose reductase	6	25	26.8584	27.2823	27.3899	27.2018	27.1062	27.1485	-0.0247148	0.0516337
74	AKR7A2	O43488	Aflatoxin B1 aldehyde reductase member 2	6	39	26.4192	27.0719	26.6505	26.0141	25.8602	26.5476	-0.573224	0.949062
75	ALDH16A1	Q8IZ83	Aldehyde dehydrogenase family 16 member A1	15	75	27.6747	28.1641	28.4679	28.0771	28.0467	28.1336	-0.0163981	0.0235832
76	ALDH18A1	P54886	Delta-1-pyrroline-5-carboxylate synthase;Glutamate 5-kinase;Gamma-glutamyl phosphate reductase	38	371	30.7505	31.1559	31.0373	30.8198	30.9025	30.7725	-0.149651	0.52113
77	ALDH1A2	O94788	Retinal dehydrogenase 2	10	54	25.3481	26.0475	25.9383	26.7483	27.7044	27.3556	1.49149	1.86853
78	ALDH1B1	P30837	Aldehyde dehydrogenase X, mitochondrial	15	94	28.877	29.447	28.9864	28.7766	28.7753	28.6986	-0.353305	0.935674
79	ALDH2	P05091	Aldehyde dehydrogenase, mitochondrial	5	38	26.337	26.6782	26.712	26.4581	26.1156	26.3886	-0.254965	0.735294
80	ALDH3A2	P51648	Fatty aldehyde dehydrogenase	5	16	23.3047	25.437	25.3233	25.7581	26.4683	26.2128	1.45807	0.9433
81	ALDH5A1	P51649	Succinate-semialdehyde dehydrogenase, mitochondrial	7	29	27.0902	27.8046	27.4369	26.7676	26.9213	26.7604	-0.627493	1.37634
82	ALDH6A1	Q02252	Methylmalonate-semialdehyde dehydrogenase [acylating], mitochondrial	4	19	25.5139	24.0797	26.2549	26.2593	26.0953	26.1474	0.884523	0.621059
83	ALDH7A1	P49419	Alpha-aminoadipic semialdehyde dehydrogenase	21	201	30.6407	31.0815	30.9275	30.3104	30.6185	30.4012	-0.439866	1.30264
84	ALDH9A1	P49189	4-trimethylaminobutyraldehyde dehydrogenase	19	193	29.4343	29.8366	29.8816	29.6391	29.6776	29.5775	-0.0860984	0.232849
85	ALDOA	P04075	Fructose-bisphosphate aldolase A	14	109	29.1498	29.4641	30.0293	29.2567	28.9455	29.0386	-0.46751	0.789489
86	ALKBH5	Q6P6C2	RNA demethylase ALKBH5	4	24	26.0459	26.3025	25.7138	26.4496	26.1993	26.019	0.201933	0.405345
87	ALMS1	Q8TCU4	Alstrom syndrome protein 1	10	7	25.2968	23.0716	24.0152	26.2679	25.7879	26.037	1.90305	1.34902
88	ALYREF	Q86V81	THO complex subunit 4	9	175	30.9166	30.1833	30.1685	30.4063	30.4409	30.6038	0.060866	0.0847973
89	ANAPC1	Q9H1A4	Anaphase-promoting complex subunit 1	3	10	23.7083	24.8209	24.9225	24.7951	24.8235	24.5875	0.251481	0.25191
90	ANK2	Q01484	Ankyrin-2	6	13	25.072	23.8804	24.4043	25.4961	25.7018	25.4406	1.09393	1.43742
91	ANK3	Q12955	Ankyrin-3	8	21	22.4043	28.0869	27.924	28.2288	28.1722	28.1878	2.05782	0.47835
92	ANKHD1	Q8IWZ3	Ankyrin repeat and KH domain-containing protein 1	46	179	28.0127	28.1806	28.4466	30.1991	30.3184	30.3831	2.08687	3.96098
93	ANKLE2	Q86XL3	Ankyrin repeat and LEM domain-containing protein 2	12	26	28.9041	28.1744	28.5654	28.6508	28.1881	28.5253	-0.0932674	0.136601
94	ANKRD17	O75179	Ankyrin repeat domain-containing protein 17	68	559	28.0663	28.1783	28.3006	32.5741	32.3895	32.3514	4.25659	5.80209
95	ANKS1A	Q92625	Ankyrin repeat and SAM domain-containing protein 1A	12	64	25.1991	25.5003	25.5855	29.3869	28.7856	29.1883	3.69195	4.19355
96	ANLN	Q9NQW6	Actin-binding protein anillin	9	39	26.6413	27.5575	26.9	28.8975	28.4313	29.0102	1.74673	2.23623
97	ANO8	Q9HCE9	Anoctamin-8	2	18	23.9759	24.0735	23.033	26.4862	26.6359	26.5852	2.87499	2.99621
98	ANP32E	Q9BTT0	Acidic leucine-rich nuclear phosphoprotein 32 family member E	1	20	24.7759	24.7447	24.7718	25.7897	26.323	25.9336	1.2513	2.84494
99	ANXA11	P50995	Annexin A11	14	85	28.472	28.548	28.78	27.4572	27.697	27.8642	-0.927195	2.45724
100	ANXA2;ANXA2P2	P07355;A6NMY6	Annexin A2;Putative annexin A2-like protein	6	10	23.8902	23.6378	24.6042	26.0437	26.045	26.3869	2.11446	2.61129
101	ANXA6	P08133	Annexin A6	2	10	24.4596	24.4878	24.7424	23.0552	23.5083	23.6003	-1.17533	2.4514
102	AP1M1	Q9BXS5	AP-1 complex subunit mu-1	5	24	26.7589	26.9598	26.8805	26.4017	26.553	26.4236	-0.406937	2.24961
103	AP1S2	P56377	AP-1 complex subunit sigma-2	2	9	23.5562	24.4754	24.0941	26.3006	26.4746	26.5691	2.40621	3.0087
104	AP2A1	O95782	AP-2 complex subunit alpha-1	7	40	27.0328	26.8894	26.7372	26.3266	26.3975	26.4887	-0.48221	2.11071
105	AP2B1	P63010	AP-2 complex subunit beta	8	11	26.1119	26.5517	26.1776	26.373	23.8037	24.3041	-1.45345	0.845434
106	AP2M1	Q96CW1	AP-2 complex subunit mu	4	25	26.6203	26.5766	26.6481	25.9703	26.2448	26.025	-0.535	2.46082
107	AP3D1	O14617	AP-3 complex subunit delta-1	9	64	28.1642	28.3899	28.403	29.502	29.337	29.4885	1.12347	3.55481
108	AP3M1	Q9Y2T2	AP-3 complex subunit mu-1	3	21	26.0371	26.392	26.598	24.3357	25.7893	25.6673	-1.07826	1.02578
109	AP3S1	Q92572	AP-3 complex subunit sigma-1	4	30	29.008	26.7189	26.6808	27.2369	27.253	26.5268	-0.463726	0.224894
110	APC	P25054	Adenomatous polyposis coli protein	14	38	23.1642	24.3153	23.9098	27.6773	27.6423	27.9045	3.94494	3.46699
111	APEH	P13798	Acylamino-acid-releasing enzyme	10	52	26.9272	27.57	27.4442	27.1527	27.4497	27.2483	-0.030241	0.0481364
112	APEX1	P27695	DNA-(apurinic or apyrimidinic site) lyase;DNA-(apurinic or apyrimidinic site) lyase, mitochondrial	9	43	27.3076	27.4356	27.7535	27.9486	27.5808	27.821	0.284548	0.766584
113	APOA1BP	Q8NCW5	NAD(P)H-hydrate epimerase	4	20	24.0597	24.0476	26.461	26.1773	26.2478	25.9749	1.27717	0.724669
114	APPL1	Q9UKG1	DCC-interacting protein 13-alpha	4	22	25.9783	26.0456	26.3286	27.1117	27.3312	27.521	1.20381	2.78001
115	APRT	P07741	Adenine phosphoribosyltransferase	9	51	28.3546	28.7655	28.6206	27.4959	27.8477	27.598	-0.932995	2.37178
116	ARCN1	P48444	Coatomer subunit delta	21	157	29.9841	30.353	30.0788	29.8901	30.2044	30.0525	-0.0896447	0.247997
117	ARFGAP1	Q8N6T3	ADP-ribosylation factor GTPase-activating protein 1	9	59	24.1163	22.4795	24.6829	28.4423	28.4448	28.4247	4.67775	2.6778
118	ARFGAP2	Q8N6H7	ADP-ribosylation factor GTPase-activating protein 2	5	16	22.6358	23.2845	23.2862	27.3095	27.2896	27.3142	4.23562	4.39412
119	ARFGEF3	Q5TH69	Brefeldin A-inhibited guanine nucleotide-exchange protein 3	2	20	23.6413	25.5862	23.9261	26.959	26.6259	26.5052	2.31217	1.68905
120	ARGLU1	Q9NWB6	Arginine and glutamate-rich protein 1	7	40	27.3631	27.8929	28.4916	27.2202	25.4484	27.0382	-1.34694	0.970257
121	ARHGAP17	Q68EM7	Rho GTPase-activating protein 17	5	19	25.5041	25.3452	25.8802	25.6203	25.8151	25.8637	0.189835	0.469084
122	ARHGAP21	Q5T5U3	Rho GTPase-activating protein 21	17	58	25.3498	23.95	23.7264	27.9811	29.1425	27.9948	4.03076	2.4951
123	ARHGAP35	Q9NRY4	Rho GTPase-activating protein 35	5	4	21.227	24.2238	24.1899	24.3823	24.8223	24.4421	1.33531	0.595448
124	ARHGDIA	P52565	Rho GDP-dissociation inhibitor 1	3	23	26.3831	26.5384	26.6651	26.7167	26.6959	26.6196	0.148556	0.790944
125	ARHGEF1	Q92888	Rho guanine nucleotide exchange factor 1	8	20	25.356	25.9653	25.961	26.7767	26.0493	25.9618	0.501879	0.69708
126	ARHGEF10	O15013	Rho guanine nucleotide exchange factor 10	3	12	23.5351	23.7911	23.254	26.0074	25.7585	25.7515	2.31241	3.70819
127	ARHGEF12	Q9NZN5	Rho guanine nucleotide exchange factor 12	8	20	23.7022	23.2365	23.8083	26.5673	26.5702	26.4496	2.94669	4.08834
128	ARHGEF18	Q6ZSZ5	Rho guanine nucleotide exchange factor 18	3	6	22.867	23.7357	23.297	24.1534	24.348	24.0879	0.89652	1.56948
129	ARHGEF2	Q92974	Rho guanine nucleotide exchange factor 2	10	41	26.253	27.771	26.7653	27.153	27.6542	27.6423	0.553385	0.509853
130	ARHGEF7	Q14155	Rho guanine nucleotide exchange factor 7	5	15	23.4435	23.8108	23.8173	27.0487	27.0704	27.0847	3.37738	4.96663
131	ARID1A	O14497	AT-rich interactive domain-containing protein 1A	6	23	24.8174	23.3897	24.906	25.9917	25.8104	25.7507	1.47987	1.38991
132	ARID3A	Q99856	AT-rich interactive domain-containing protein 3A	11	53	24.0885	23.4079	23.7992	28.9686	28.8165	29.0341	5.17455	4.81426
133	ARID3B	Q8IVW6	AT-rich interactive domain-containing protein 3B	21	120	22.9868	24.2011	22.9637	30.534	30.3386	30.4788	7.06658	4.16551
134	ARID4B	Q4LE39	AT-rich interactive domain-containing protein 4B	2	10	23.5226	23.6034	24.3492	25.1576	24.9204	24.9533	1.18537	1.91048
135	ARIH1	Q9Y4X5	E3 ubiquitin-protein ligase ARIH1	4	4	25.4206	26.4123	25.2251	23.8712	24.7243	25.0554	-1.13576	1.04745
136	ARIH2	O95376	E3 ubiquitin-protein ligase ARIH2	4	17	25.7435	25.3228	25.744	25.1283	25.1815	23.233	-1.08915	0.764001
137	ARL6IP4	Q66PJ3	ADP-ribosylation factor-like protein 6-interacting protein 4	4	18	27.0308	26.5026	27.9682	25.5281	25.5718	26.1037	-1.43265	1.42809
138	ARPC1A	Q92747	Actin-related protein 2/3 complex subunit 1A	5	32	27.0432	26.8251	27.0066	26.8178	26.9919	26.9023	-0.0542819	0.256526
139	ARPC1B	O15143	Actin-related protein 2/3 complex subunit 1B	5	28	27.3898	27.3168	27.2453	27.1482	27.0133	27.139	-0.217127	1.6436
140	ARPC2	O15144	Actin-related protein 2/3 complex subunit 2	4	17	26.2338	23.3179	23.6533	26.1339	26.3071	25.9793	1.73844	0.873871
141	ARPC3	O15145	Actin-related protein 2/3 complex subunit 3	3	25	26.6523	26.732	27.4007	25.9203	24.7945	26.28	-1.26339	1.17284
142	ARPC4	P59998	Actin-related protein 2/3 complex subunit 4	9	70	28.3329	28.8395	28.2907	27.2695	27.2074	27.2147	-1.25717	2.67898
143	ARPIN	Q7Z6K5	Arpin	11	64	23.4742	25.074	24.8138	29.2616	29.3854	29.2437	4.84289	3.20468
144	ASCC1	Q8N9N2	Activating signal cointegrator 1 complex subunit 1	3	10	24.8745	23.5074	23.9598	27.2361	27.1051	27.2421	3.08051	2.79675
145	ASCC3	Q8N3C0	Activating signal cointegrator 1 complex subunit 3	12	35	26.5846	26.2186	26.3015	28.0261	27.8994	27.8777	1.56617	3.70003
146	ASNS	P08243	Asparagine synthetase [glutamine-hydrolyzing]	29	280	30.6191	30.6372	30.6641	30.4869	30.7377	30.5222	-0.0578359	0.294994
147	ASPH	Q12797	Aspartyl/asparaginyl beta-hydroxylase	3	13	23.286	24.3351	24.7352	25.3668	24.7801	24.9054	0.898652	0.896409
148	ASPSCR1	Q9BZE9	Tether containing UBX domain for GLUT4	5	36	26.5825	27.0649	26.6451	26.1682	26.2722	26.4894	-0.454215	1.19563
149	ASS1	P00966	Argininosuccinate synthase	13	44	28.4057	28.5095	28.727	28.4361	28.4785	28.2369	-0.163558	0.608996
150	ATAD1	Q8NBU5	ATPase family AAA domain-containing protein 1	3	30	27.4368	27.4109	27.7227	27.0314	26.814	26.9822	-0.580961	2.08066
151	ATAD3A	Q9NVI7	ATPase family AAA domain-containing protein 3A	27	198	29.9077	29.9187	29.962	29.2354	29.31	29.2255	-0.67245	4.55129
152	ATAD3B	Q5T9A4	ATPase family AAA domain-containing protein 3B	19	31	27.9748	27.4634	27.6659	27.4783	27.5385	27.5042	-0.1944	0.578631
153	ATE1	O95260	Arginyl-tRNA--protein transferase 1	1	9	22.8415	24.8439	24.2615	24.5455	25.0565	24.8707	0.841965	0.616846
154	ATF7IP	Q6VMQ6	Activating transcription factor 7-interacting protein 1	5	25	25.9523	23.7074	25.7078	27.1499	27.113	27.2496	2.04833	1.34486
155	ATG2B	Q96BY7	Autophagy-related protein 2 homolog B	13	71	23.2173	24.7505	24.1799	28.5281	28.7415	28.7125	4.61143	3.2827
156	ATIC	P31939	Bifunctional purine biosynthesis protein PURH;Phosphoribosylaminoimidazolecarboxamide formyltransferase;IMP cyclohydrolase	12	75	27.7312	28.0887	27.973	27.5044	27.6605	27.6455	-0.327533	1.31696
157	ATL2	Q8NHH9	Atlastin-2	3	17	25.1767	25.6256	25.199	25.6384	25.6008	25.9509	0.396292	1.01385
158	ATP1A1	P05023	Sodium/potassium-transporting ATPase subunit alpha-1	34	305	30.2865	30.7988	30.7388	31.0373	31.1032	30.9486	0.421694	1.18152
159	ATP2A2	P16615	Sarcoplasmic/endoplasmic reticulum calcium ATPase 2	31	301	30.1603	30.7082	30.6048	30.4298	30.5445	30.4023	-0.0322094	0.0645593
160	ATP2B1	P20020	Plasma membrane calcium-transporting ATPase 1	9	69	27.0562	27.1517	27.472	27.5276	27.5983	27.4843	0.310099	1.12143
161	ATP5A1	P25705	ATP synthase subunit alpha, mitochondrial	42	592	32.8723	33.2514	33.1767	32.691	32.5205	32.5013	-0.529184	1.81022
162	ATP5B	P06576	ATP synthase subunit beta, mitochondrial	31	406	31.7149	31.7405	31.6463	31.5875	31.8379	31.6637	-0.00422351	0.0176973
163	ATP5C1	P36542	ATP synthase subunit gamma, mitochondrial	8	35	27.1411	27.4692	27.5973	27.0013	27.2378	27.172	-0.265507	0.80197
164	ATP5H	O75947	ATP synthase subunit d, mitochondrial	4	30	25.4357	25.4196	25.9061	25.716	26.3081	26.6339	0.632235	0.946625
165	ATP5J2	P56134	ATP synthase subunit f, mitochondrial	4	46	26.6172	26.7317	26.7777	26.3885	26.6122	26.5282	-0.19923	1.15926
166	ATP5L	O75964	ATP synthase subunit g, mitochondrial	5	46	27.2989	27.8099	27.543	27.1056	27.4527	27.2638	-0.276594	0.707627
167	ATP5O	P48047	ATP synthase subunit O, mitochondrial	7	52	28.8622	28.8162	28.7477	28.2011	28.1376	28.1061	-0.660407	3.9617
168	ATP6V1A	P38606	V-type proton ATPase catalytic subunit A	8	44	24.1735	24.0321	26.4344	27.4289	27.882	27.4185	2.69646	1.5641
169	ATP6V1B2	P21281	V-type proton ATPase subunit B, brain isoform	11	48	26.1389	26.1171	26.1945	27.5698	27.4433	27.6369	1.39984	4.66331
170	ATP6V1E1	P36543	V-type proton ATPase subunit E 1	6	11	24.1282	23.9071	24.7797	26.1111	26.1998	25.8372	1.7777	2.48006
171	ATP6V1H	Q9UI12	V-type proton ATPase subunit H	5	26	27.5152	27.7909	28.2558	27.1842	27.0362	27.1536	-0.729265	1.5252
172	ATRX	P46100	Transcriptional regulator ATRX	27	219	25.4101	24.6512	25.3852	31.0798	31.0688	31.1583	5.95348	4.7307
173	ATXN2	Q99700	Ataxin-2	15	112	27.4504	28.0054	27.8559	29.4447	29.353	29.2965	1.59416	3.12932
174	ATXN2L	Q8WWM7	Ataxin-2-like protein	40	473	29.538	29.7655	30.0111	33.5343	33.44	33.6069	3.7555	4.8809
175	ATXN3	P54252	Ataxin-3	6	7	24.9441	24.1544	23.237	26.6807	26.6402	26.7899	2.59176	2.19582
176	AUP1	Q9Y679	Ancient ubiquitous protein 1	3	18	26.393	26.3905	26.8249	25.6091	25.8359	25.5735	-0.863317	2.18478
177	AURKB	Q96GD4	Aurora kinase B	7	46	27.4372	26.7661	26.6239	27.0183	26.8598	27.0308	0.0272013	0.03587
178	AVEN	Q9NQS1	Cell death regulator Aven	3	18	23.0736	23.7887	23.9035	26.1237	26.0072	25.875	2.41337	3.06611
179	BABAM1	Q9NWV8	BRISC and BRCA1-A complex member 1	3	13	24.5839	23.9873	24.4221	27.5536	27.3733	27.6046	3.17944	4.11344
180	BAG2	O95816	BAG family molecular chaperone regulator 2	4	26	25.2739	24.4231	23.2957	26.8559	26.7523	26.833	2.48285	1.90737
181	BANF1	O75531	Barrier-to-autointegration factor;Barrier-to-autointegration factor, N-terminally processed	2	6	25.4322	23.735	23.5502	25.0591	22.7969	23.1303	-0.577047	0.246723
182	BAP18	Q8IXM2	Chromatin complexes subunit BAP18	5	21	23.5387	25.0552	22.0857	27.8927	28.0073	27.9909	4.40375	2.16576
183	BAZ1A	Q9NRL2	Bromodomain adjacent to zinc finger domain protein 1A	6	22	27.1625	25.4996	25.6063	25.8684	25.8422	26.0661	-0.163919	0.109352
184	BCAP31	P51572	B-cell receptor-associated protein 31	9	67	27.6633	27.9243	28.2167	28.459	28.7701	28.5013	0.642014	1.57602
185	BCAS2	O75934	Pre-mRNA-splicing factor SPF27	7	35	27.3903	27.3716	27.7542	28.0768	27.5141	27.753	0.275981	0.602437
186	BCAT1	P54687	Branched-chain-amino-acid aminotransferase, cytosolic	7	31	26.8539	27.1765	27.196	26.8473	26.9577	26.7252	-0.23207	0.829674
187	BCCIP	Q9P287	BRCA2 and CDKN1A-interacting protein	4	19	26.1375	26.8906	26.0618	24.6262	24.8997	25.0806	-1.49451	2.14206
188	BCKDHA	P12694	2-oxoisovalerate dehydrogenase subunit alpha, mitochondrial	4	18	23.272	24.9853	27.0494	26.5273	26.3497	26.605	1.39174	0.564684
189	BCKDK	O14874	[3-methyl-2-oxobutanoate dehydrogenase [lipoamide]] kinase, mitochondrial	4	20	25.1558	25.5131	25.2768	25.271	24.3764	24.1252	-0.72444	0.932441
190	BCLAF1	Q9NYF8	Bcl-2-associated transcription factor 1	31	276	26.5894	24.7732	25.6674	31.6389	31.3616	31.6645	5.87835	3.41476
191	BCR	P11274	Breakpoint cluster region protein	3	10	23.9494	24.7817	22.5112	26.0453	25.9017	25.9657	2.22346	1.54259
192	BICD2	Q8TD16	Protein bicaudal D homolog 2	2	11	23.6786	24.0017	23.6732	24.9289	24.9338	24.7623	1.09049	3.05753
193	BLVRA	P53004	Biliverdin reductase A	8	43	27.7127	28.149	28.0638	27.0339	27.1925	27.0747	-0.874788	2.45612
194	BMS1	Q14692	Ribosome biogenesis protein BMS1 homolog	8	27	26.7689	25.3038	25.5634	27.1365	26.8961	26.2845	0.893694	0.797532
195	BNIP1	Q12981	Vesicle transport protein SEC20	2	5	24.5698	24.5962	24.6913	23.6787	23.8147	23.3902	-0.991187	2.79305
196	BOD1L1	Q8NFC6	Biorientation of chromosomes in cell division protein 1-like 1	23	96	24.2022	24.6679	24.5002	29.075	29.0969	29.0202	4.60729	5.31813
197	BOLA2	Q9H3K6	BolA-like protein 2	6	19	25.8547	25.6567	26.2482	26.4061	26.0725	26.1465	0.28853	0.648404
198	BOP1	Q14137	Ribosome biogenesis protein BOP1	16	38	28.3951	26.0003	26.2855	26.6734	26.7561	27.0481	-0.0677452	0.0298482
199	BPHL	Q86WA6	Valacyclovir hydrolase	3	12	25.7615	26.0852	26.0165	25.2645	25.0805	25.3321	-0.728718	2.37968
200	BPTF	Q12830	Nucleosome-remodeling factor subunit BPTF	14	75	25.665	24.4566	25.7314	28.9443	28.8418	28.9728	3.63534	3.02376
201	BRAP	Q7Z569	BRCA1-associated protein	24	140	25.9087	25.6275	26.5592	29.7241	30.8825	30.8696	4.46025	3.15228
202	BRD4	O60885	Bromodomain-containing protein 4	23	131	23.7986	22.7961	22.9351	30.1864	30.0241	30.0841	6.92158	4.58359
203	BRIP1	Q9BX63	Fanconi anemia group J protein	5	32	23.372	24.5186	23.2772	26.8339	26.8706	26.9232	3.15327	2.85476
204	BRIX1	Q8TDN6	Ribosome biogenesis protein BRX1 homolog	7	51	29.1215	27.6038	27.8932	28.9689	28.3184	28.5068	0.391857	0.318678
205	BTAF1	O14981	TATA-binding protein-associated factor 172	7	23	25.6296	26.117	25.9501	25.7774	25.9408	25.9479	-0.0101922	0.0221676
206	BTF3	P20290	Transcription factor BTF3	7	58	24.8225	24.4001	24.9219	28.7345	29.1056	28.7383	4.14465	4.47863
207	BTF3L4	Q96K17	Transcription factor BTF3 homolog 4	2	15	24.713	23.0115	23.2443	26.3496	26.4874	26.5038	2.79068	2.19116
208	BUB1B	O60566	Mitotic checkpoint serine/threonine-protein kinase BUB1 beta	12	46	23.8374	25.7184	26.529	28.1254	28.0679	27.5837	2.56409	1.45951
209	BUB3	O43684	Mitotic checkpoint protein BUB3	14	138	29.2268	29.8219	29.5657	28.4847	28.7116	28.551	-0.955678	2.17556
210	BYSL	Q13895	Bystin	10	77	24.3962	25.1159	25.0357	29.8917	29.5223	29.7344	4.86687	4.37545
211	C11orf98	E9PRG8	Uncharacterized protein C11orf98	2	24	25.7279	25.397	25.7948	26.275	26.037	26.152	0.514793	1.66387
212	C12orf45	Q8N5I9	Uncharacterized protein C12orf45	4	14	23.0282	23.368	23.7411	26.5304	26.4911	26.5449	3.14305	3.96391
213	C14orf166	Q9Y224	UPF0568 protein C14orf166	5	17	27.0788	25.167	25.2273	24.3327	25.8621	24.7819	-0.832143	0.464627
214	C19orf43	Q9BQ61	Uncharacterized protein C19orf43	11	148	24.4868	24.8303	25.9766	30.7277	30.5738	30.7913	5.59967	3.60126
215	C1orf198	Q9H425	Uncharacterized protein C1orf198	6	38	24.101	23.3351	26.0074	27.8851	27.642	27.7722	3.28523	1.83488
216	C1QBP	Q07021	Complement component 1 Q subcomponent-binding protein, mitochondrial	6	105	29.7434	29.2857	29.6842	30.1413	30.3417	30.3824	0.717347	1.94255
217	C21orf33	P30042	ES1 protein homolog, mitochondrial	15	157	30.191	30.2772	30.4199	30.357	30.4346	30.4206	0.108048	0.694195
218	C8orf33	Q9H7E9	UPF0488 protein C8orf33	5	22	26.8987	26.7385	26.467	27.2943	26.8742	27.0254	0.363199	0.966673
219	C9orf64	Q5T6V5	UPF0553 protein C9orf64	5	14	23.7479	23.8484	23.3935	25.4265	25.3972	25.5049	1.77957	3.63629
220	CACTIN	Q8WUQ7	Cactin	8	30	24.2653	24.2812	23.9948	27.9567	27.766	28.0293	3.73693	5.1746
221	CACYBP	Q9HB71	Calcyclin-binding protein	4	25	27.0108	23.2498	24.3005	27.4031	26.869	27.1724	2.29445	0.949286
222	CAD	P27708	CAD protein;Glutamine-dependent carbamoyl-phosphate synthase;Aspartate carbamoyltransferase;Dihydroorotase	43	267	30.4313	31.0163	30.7488	29.3096	29.7029	29.3659	-1.27265	2.43464
223	CALD1	Q05682	Caldesmon	23	157	23.7993	27.2122	26.1125	31.637	29.2083	29.4358	4.38569	1.5861
224	CALU	O43852	Calumenin	7	54	27.9721	27.9197	27.958	27.9816	28.0533	28.0754	0.0867799	1.25944
225	CAMK2D;CAMK2A;CAMK2B	Q13557;Q9UQM7;Q13554	Calcium/calmodulin-dependent protein kinase type II subunit delta;Calcium/calmodulin-dependent protein kinase type II subunit alpha;Calcium/calmodulin-dependent protein kinase type II subunit beta	6	17	26.2074	26.2768	26.3307	25.0449	25.1343	24.7914	-1.28147	3.52836
226	CAMSAP1	Q5T5Y3	Calmodulin-regulated spectrin-associated protein 1	31	165	23.9593	24.2725	23.5031	30.3926	30.2545	30.4004	6.43754	5.02584
227	CAMSAP2	Q08AD1	Calmodulin-regulated spectrin-associated protein 2	14	49	25.0764	24.0397	24.2589	28.3457	28.1991	28.2529	3.80757	3.55273
228	CAMSAP3	Q9P1Y5	Calmodulin-regulated spectrin-associated protein 3	9	35	25.1367	25.602	25.6541	27.1188	26.6255	27.2368	1.52943	2.44693
229	CAND1	Q86VP6	Cullin-associated NEDD8-dissociated protein 1	11	63	27.7889	27.9893	27.822	27.6598	27.7391	27.7895	-0.137223	0.879869
230	CANX	P27824	Calnexin	7	77	28.1958	28.0718	28.5184	27.9216	28.1826	27.9306	-0.250413	0.724371
231	CAP1	Q01518	Adenylyl cyclase-associated protein 1	8	27	26.3104	26.33	24.224	28.9947	27.8973	29.0341	3.02055	1.72426
232	CAPN1	P07384	Calpain-1 catalytic subunit	4	10	25.2204	25.9849	25.4206	24.0456	25.2165	24.3637	-1.00001	1.12553
233	CAPN2	P17655	Calpain-2 catalytic subunit	11	68	27.7251	28.1858	28.1074	27.1944	27.5008	27.4377	-0.628444	1.67803
234	CAPRIN1	Q14444	Caprin-1	22	224	28.5961	28.5927	28.7435	31.5393	31.6243	31.7078	2.97966	5.75118
235	CAPZA1	P52907	F-actin-capping protein subunit alpha-1	12	135	30.6197	31.2638	30.8613	30.182	30.0522	30.0543	-0.818776	1.88056
236	CAPZA2	P47755	F-actin-capping protein subunit alpha-2	7	33	27.3868	27.8734	27.5857	27.4962	27.5214	27.4264	-0.133996	0.392521
237	CAPZB	P47756	F-actin-capping protein subunit beta	10	126	29.2552	29.3453	29.4066	29.2013	29.4425	29.2251	-0.046044	0.200571
238	CARM1	Q86X55	Histone-arginine methyltransferase CARM1	5	36	27.2584	27.5772	28.0211	26.995	26.4587	26.6865	-0.905512	1.54408
239	CARS	P49589	Cysteine--tRNA ligase, cytoplasmic	2	11	23.5633	25.7237	24.2685	26.0773	26.1421	26.1399	1.60124	1.18287
240	CARS2	Q9HA77	Probable cysteine--tRNA ligase, mitochondrial	6	14	26.096	26.351	26.6112	24.5412	23.6236	23.9575	-2.31198	2.78059
241	CASP3	P42574	Caspase-3;Caspase-3 subunit p17;Caspase-3 subunit p12	5	35	27.3073	27.7275	27.3505	27.188	26.9354	27.0835	-0.39278	1.21234
242	CASP7	P55210	Caspase-7;Caspase-7 subunit p20;Caspase-7 subunit p11	3	25	25.774	26.1638	25.9304	24.5862	25.0917	24.873	-1.10578	2.4043
243	CAST	P20810	Calpastatin	7	27	24.6823	23.4018	23.111	27.9185	27.6716	27.7583	4.05111	2.93912
244	CBFB	Q13951	Core-binding factor subunit beta	3	21	26.3785	26.7159	26.5831	26.3294	26.2265	26.4148	-0.235607	0.984073
245	CBLL1	Q75N03	E3 ubiquitin-protein ligase Hakai	3	22	23.5687	23.7083	25.5418	25.8827	25.7865	25.8153	1.55528	1.14937
246	CBR1	P16152	Carbonyl reductase [NADPH] 1	21	172	30.3322	30.7295	30.6637	29.9694	29.9611	29.8981	-0.632283	2.14361
247	CBR3	O75828	Carbonyl reductase [NADPH] 3	8	32	26.7779	27.0797	26.9728	26.1939	26.5369	26.6935	-0.468693	1.27846
248	CBS	P0DN79;P35520	Cystathionine beta-synthase	13	66	27.8039	27.832	27.8932	28.9355	28.9626	28.988	1.11899	5.48743
249	CBX1	P83916	Chromobox protein homolog 1	7	24	27.3587	24.6007	24.1762	27.3005	27.3754	27.4217	1.98734	0.930549
250	CBX3	Q13185	Chromobox protein homolog 3	9	126	29.1177	28.0343	28.2915	29.2766	29.4575	29.2514	0.847347	1.19542
251	CBX5	P45973	Chromobox protein homolog 5	11	79	29.192	28.3122	28.032	28.6157	28.2191	28.3882	-0.104382	0.102004
252	CC2D1A	Q6P1N0	Coiled-coil and C2 domain-containing protein 1A	13	59	27.281	28.0321	27.7601	28.0378	27.7237	27.9295	0.2059	0.360565
253	CCAR1	Q8IX12	Cell division cycle and apoptosis regulator protein 1	10	29	26.2438	26.4642	26.4554	27.1732	27.0782	26.8693	0.652419	2.32071
254	CCAR2	Q8N163	Cell cycle and apoptosis regulator protein 2	31	251	30.4873	30.7075	30.8809	30.1271	30.1625	30.1635	-0.540859	2.03856
255	CCBL2	Q6YP21	Kynurenine--oxoglutarate transaminase 3	3	13	24.6168	24.9945	25.0155	24.5744	25.0221	24.875	-0.0517928	0.10066
256	CCDC101	Q96ES7	SAGA-associated factor 29 homolog	3	19	24.2031	25.4056	26.0064	26.5929	27.2704	26.6823	1.64351	1.34558
257	CCDC124	Q96CT7	Coiled-coil domain-containing protein 124	16	102	25.8737	24.3216	23.4539	30.5218	30.3952	30.4533	5.90703	2.94596
258	CCDC22	O60826	Coiled-coil domain-containing protein 22	7	33	25.5448	25.7846	25.8669	26.1293	26.1621	26.2636	0.452885	1.90622
259	CCDC25	Q86WR0	Coiled-coil domain-containing protein 25	2	9	23.8834	22.6161	23.3383	26.1907	26.4654	26.4605	3.09296	2.91509
260	CCDC43	Q96MW1	Coiled-coil domain-containing protein 43	4	29	22.5032	25.2123	23.657	28.5272	28.8205	28.7205	4.89861	2.46419
261	CCDC47	Q96A33	Coiled-coil domain-containing protein 47	6	43	26.9729	27.0971	27.7365	27.976	27.9598	27.9834	0.704229	1.38801
262	CCDC50	Q8IVM0	Coiled-coil domain-containing protein 50	6	21	25.6289	24.9582	24.157	26.4242	26.3205	26.5414	1.51397	1.61136
263	CCDC8	Q9H0W5	Coiled-coil domain-containing protein 8	5	48	26.9266	26.8332	27.1647	27.176	27.1153	27.2679	0.211568	0.912725
264	CCDC85C	A6NKD9	Coiled-coil domain-containing protein 85C	6	44	23.6786	22.963	23.4027	27.9361	27.7178	27.8522	4.4873	4.48391
265	CCDC86	Q9H6F5	Coiled-coil domain-containing protein 86	7	35	28.6931	26.2807	26.1342	27.4308	27.108	27.1894	0.206752	0.0879442
266	CCNT1	O60563	Cyclin-T1	10	65	26.2335	27.3164	27.398	28.4444	28.0399	28.3715	1.30263	1.52161
267	CCP110	O43303	Centriolar coiled-coil protein of 110 kDa	4	11	24.1439	23.7441	23.6427	25.1735	25.6726	25.6307	1.64868	2.76133
268	CCT2	P78371	T-complex protein 1 subunit beta	30	314	30.1915	30.2673	30.5633	30.2387	30.2562	30.0895	-0.145911	0.510902
269	CCT3	P49368	T-complex protein 1 subunit gamma	45	841	32.6977	33.2727	33.1092	32.7361	32.9633	32.6667	-0.237843	0.544449
270	CCT4	P50991	T-complex protein 1 subunit delta	41	693	32.5199	32.9063	32.9192	32.1819	32.3896	32.1729	-0.53369	1.63682
271	CCT5	P48643	T-complex protein 1 subunit epsilon	47	763	32.5609	32.9391	32.8895	32.1489	32.367	32.1262	-0.582464	1.83587
272	CCT6A	P40227	T-complex protein 1 subunit zeta	43	587	32.3532	32.7331	32.8074	32.5613	32.6711	32.5956	-0.0219231	0.0522559
273	CCT7	Q99832	T-complex protein 1 subunit eta	42	634	32.206	32.5324	32.4566	31.8927	32.1495	31.9612	-0.397195	1.47358
274	CCT8	P50990	T-complex protein 1 subunit theta	62	1181	33.106	33.548	33.4343	34.3562	34.4754	34.3759	1.03975	2.78462
275	CD2AP	Q9Y5K6	CD2-associated protein	45	435	27.6853	26.5668	27.1611	33.3486	33.2483	34.611	6.59826	3.5745
276	CD2BP2	O95400	CD2 antigen cytoplasmic tail-binding protein 2	8	75	26.6611	27.5587	27.6458	28.3991	27.9238	28.5484	1.00189	1.28109
277	CDC123	O75794	Cell division cycle protein 123 homolog	2	14	24.5894	23.5825	24.665	25.1886	25.7804	25.4563	1.19613	1.43178
278	CDC37	Q16543	Hsp90 co-chaperone Cdc37;Hsp90 co-chaperone Cdc37, N-terminally processed	21	294	30.2175	30.407	30.588	30.9256	30.8685	30.84	0.473879	1.90256
279	CDC42	P60953	Cell division control protein 42 homolog	8	105	28.5051	28.7152	28.5104	28.526	28.4908	28.3961	-0.105937	0.597696
280	CDC5L	Q99459	Cell division cycle 5-like protein	23	171	29.4081	29.2628	29.0965	29.6848	29.7651	29.7766	0.486385	2.16961
281	CDC73	Q6P1J9	Parafibromin	14	50	27.3801	27.721	27.8572	28.1767	28.3016	27.6931	0.404306	0.799908
282	CDK1	P06493	Cyclin-dependent kinase 1	21	236	30.6006	31.0504	30.8513	30.3875	30.4652	30.5098	-0.37995	1.31829
283	CDK12	Q9NYV4	Cyclin-dependent kinase 12	12	45	26.6517	27.1097	26.8666	27.7633	27.6705	27.7808	0.862218	2.49132
284	CDK2	P24941	Cyclin-dependent kinase 2	12	66	28.046	27.5082	28.3457	28.094	27.9451	27.9163	0.0184631	0.0246072
285	CDK5	Q00535	Cyclin-dependent-like kinase 5	8	30	25.986	27.0853	26.5677	25.814	25.1917	25.4352	-1.06602	1.36255
286	CDK9	P50750	Cyclin-dependent kinase 9	5	18	25.8621	26.0933	26.0973	23.9621	25.1249	22.4809	-2.16159	1.31626
287	CDV3	Q9UKY7	Protein CDV3 homolog	6	56	23.8093	23.7955	24.4148	30.5574	30.5572	30.5775	6.55748	5.2507
288	CECR5	Q9BXW7	Cat eye syndrome critical region protein 5	9	31	26.4639	27.0994	26.5465	25.8211	26.6492	26.604	-0.345116	0.442711
289	CELF1	Q92879	CUGBP Elav-like family member 1	4	10	23.8747	24.1191	23.9419	25.5497	25.6217	25.6264	1.62073	4.52122
290	CENPT	Q96BT3	Centromere protein T	2	10	23.7249	24.6657	23.9378	23.6113	23.7695	24.0343	-0.304399	0.417603
291	CENPV	Q7Z7K6	Centromere protein V	6	12	28.5497	24.9289	24.7816	23.8625	24.2243	25.5181	-1.55174	0.510921
292	CEP131	Q9UPN4	Centrosomal protein of 131 kDa	13	47	24.6967	23.7934	24.6179	27.8326	27.8696	27.9861	3.52672	3.56625
293	CEP170	Q5SW79	Centrosomal protein of 170 kDa	82	655	23.0425	24.2006	24.3594	33.2483	33.1768	33.2549	9.35916	4.6369
294	CEP170B	Q9Y4F5	Centrosomal protein of 170 kDa protein B	4	16	22.5771	23.8121	24.1155	25.6275	25.2728	25.4231	1.93958	1.8023
295	CEP55	Q53EZ4	Centrosomal protein of 55 kDa	4	22	24.8374	22.7771	24.3176	26.4803	26.0656	26.285	2.29962	1.66196
296	CFDP1	Q9UEE9	Craniofacial development protein 1	6	24	23.3735	24.5745	26.4831	27.7626	27.2983	27.3183	2.64936	1.34933
297	CFL1	P23528	Cofilin-1	15	193	31.7698	32.0667	32.1212	31.1956	31.2564	30.9943	-0.837151	2.46475
298	CHAF1A	Q13111	Chromatin assembly factor 1 subunit A	21	86	29.5056	26.7142	26.4757	27.6521	27.6557	27.5827	0.0649916	0.0223008
299	CHAF1B	Q13112	Chromatin assembly factor 1 subunit B	11	40	27.2098	27.6705	27.8747	27.9373	27.7772	27.9176	0.292364	0.651312
300	CHAMP1	Q96JM3	Chromosome alignment-maintaining phosphoprotein 1	15	87	27.4953	27.7779	27.9412	28.6722	28.5249	28.5519	0.844881	2.44425
301	CHD1	O14646	Chromodomain-helicase-DNA-binding protein 1	4	5	26.8102	23.3133	23.3415	25.2095	23.6782	24.982	0.134902	0.0364086
302	CHD4	Q14839	Chromodomain-helicase-DNA-binding protein 4	42	372	29.862	29.7626	29.7059	31.1043	31.3619	31.1927	1.44278	4.08617
303	CHD8	Q9HCK8	Chromodomain-helicase-DNA-binding protein 8	29	162	27.6721	27.5546	28.1191	29.702	29.714	30.0177	2.02929	3.2698
304	CHEK1	O14757	Serine/threonine-protein kinase Chk1	2	13	25.0568	23.5264	25.5334	25.6535	25.4844	25.6181	0.879805	0.655236
305	CHERP	Q8IWX8	Calcium homeostasis endoplasmic reticulum protein	18	126	25.6589	25.0557	25.3026	30.5323	30.4256	29.7106	4.88376	4.01324
306	CHMP2B	Q9UQN3	Charged multivesicular body protein 2b	10	26	23.7229	27.6471	27.6155	29.4503	28.5505	28.6793	2.56488	0.897522
307	CHMP4B	Q9H444	Charged multivesicular body protein 4b	6	43	24.5108	22.9393	24.6635	27.5639	27.7418	27.6479	3.61334	2.54625
308	CHMP5	Q9NZZ3	Charged multivesicular body protein 5	6	47	22.6647	23.5523	23.0399	27.7925	27.8171	27.9284	4.76039	4.27712
309	CHTOP	Q9Y3Y2	Chromatin target of PRMT1 protein	5	56	28.057	27.5749	27.899	28.9257	28.6949	28.7315	0.940393	2.38854
310	CIAO1	O76071	Probable cytosolic iron-sulfur protein assembly protein CIAO1	3	5	22.8389	23.0419	23.9575	25.6728	25.3088	25.1666	2.10327	2.30145
311	CIAPIN1	Q6FI81	Anamorsin	5	22	24.4276	24.1181	24.982	27.9063	27.5424	27.7144	3.21179	3.52061
312	CIC	Q96RK0	Protein capicua homolog	9	33	24.5834	23.0572	23.1929	27.6223	27.5442	27.5954	3.97612	2.90761
313	CIRBP	Q14011	Cold-inducible RNA-binding protein	4	35	27.9893	26.2366	27.3833	27.13	26.6551	27.1451	-0.226318	0.157463
314	CIRH1A	Q969X6	Cirhin	4	5	26.1682	24.1457	24.1219	24.6062	23.4693	23.324	-1.0121	0.569569
315	CIZ1	Q9ULV3	Cip1-interacting zinc finger protein	6	22	23.134	24.9986	23.9015	26.2258	26.5206	26.1952	2.3025	1.85617
316	CKAP2	Q8WWK9	Cytoskeleton-associated protein 2	10	45	28.0918	26.436	26.9032	29.4984	29.0573	29.0622	2.0623	1.79647
317	CKAP4	Q07065	Cytoskeleton-associated protein 4	26	128	27.486	26.454	27.9857	29.3781	29.3044	29.4366	2.06447	1.986
318	CKAP5	Q14008	Cytoskeleton-associated protein 5	71	472	27.9346	28.238	28.6671	32.0745	32.1264	32.1832	3.84815	4.24388
319	CKB	P12277	Creatine kinase B-type	13	106	29.8051	28.9171	29.689	28.9339	28.7186	29.0087	-0.583358	0.934325
320	CLASP1	Q7Z460	CLIP-associating protein 1	5	7	25.9351	24.4028	23.2258	24.3796	24.672	24.3824	-0.0432421	0.0181865
321	CLASP2	O75122	CLIP-associating protein 2	7	21	25.5893	25.1713	25.0843	26.6529	26.3587	26.4083	1.19168	2.56466
322	CLIC1	O00299	Chloride intracellular channel protein 1	18	183	30.0373	30.3875	30.1757	29.8515	29.9633	29.7071	-0.359507	1.33529
323	CLIC4	Q9Y696	Chloride intracellular channel protein 4	11	106	28.4447	28.7065	28.8056	29.1815	29.1329	29.1645	0.507369	2.02235
324	CLINT1	Q14677	Clathrin interactor 1	18	132	24.9135	24.6817	26.2136	30.3916	30.2412	30.4864	5.10346	3.34639
325	CLIP1	P30622	CAP-Gly domain-containing linker protein 1	5	6	24.253	24.2831	25.0399	26.5656	26.6101	26.6978	2.09912	2.89105
326	CLNS1A	P54105	Methylosome subunit pICln	5	45	26.9572	27.0977	27.7231	27.4005	27.458	27.4629	0.181142	0.313336
327	CLPX	O76031	ATP-dependent Clp protease ATP-binding subunit clpX-like, mitochondrial	17	97	28.238	28.665	28.5658	27.993	28.1706	27.8545	-0.483564	1.42306
328	CLSPN	Q9HAW4	Claspin	5	6	23.8876	22.8717	25.1846	26.4143	25.8586	26.0987	2.14255	1.44627
329	CLTA	P09496	Clathrin light chain A	2	4	22.5604	23.8279	24.3374	24.7362	24.7888	24.6139	1.13772	1.00554
330	CLTC	Q00610	Clathrin heavy chain 1	46	337	30.9934	31.4135	31.2725	30.4769	30.5897	30.3924	-0.740123	2.25672
331	CLUH	O75153	Clustered mitochondria protein homolog	21	87	28.6758	28.8841	29.0647	28.4156	28.7469	28.5826	-0.29318	0.928711
332	CMAS	Q8NFW8	N-acylneuraminate cytidylyltransferase	5	51	27.556	27.4544	27.7865	27.2157	27.4362	27.4329	-0.237364	0.90507
333	CMBL	Q96DG6	Carboxymethylenebutenolidase homolog	2	9	24.8309	25.2955	24.6842	24.799	24.6641	24.8251	-0.174159	0.3838
334	CMPK1	P30085	UMP-CMP kinase	2	8	24.1216	24.0178	24.9888	23.8721	23.6568	24.3591	-0.413424	0.484121
335	CMSS1	Q9BQ75	Protein CMSS1	2	3	24.4782	24.4656	24.1818	26.4187	26.7984	26.6037	2.23174	3.96886
336	CNBP	P62633	Cellular nucleic acid-binding protein	8	116	30.392	30.674	30.7164	30.1274	30.1004	30.1453	-0.469758	1.99134
337	CNDP2	Q96KP4	Cytosolic non-specific dipeptidase	5	8	25.1719	25.3179	25.2188	25.1503	24.4907	24.3975	-0.556688	1.08685
338	CNN2	Q99439	Calponin-2	4	18	22.9223	24.1702	23.7058	29.1957	28.9655	29.0179	5.4603	3.90764
339	CNN3	Q15417	Calponin-3	13	97	23.9271	23.0004	23.0315	29.5231	29.7105	29.5003	6.25835	4.44351
340	CNOT1	A5YKK6	CCR4-NOT transcription complex subunit 1	14	43	26.7292	27.0811	26.7131	27.1148	27.0697	27.1044	0.255146	0.98993
341	CNOT2	Q9NZN8	CCR4-NOT transcription complex subunit 2	3	18	23.2506	24.5385	23.9214	25.5599	25.2561	25.3715	1.49236	1.75731
342	CNOT3	O75175	CCR4-NOT transcription complex subunit 3	7	31	25.8022	25.9568	25.9583	26.3893	26.7728	26.7509	0.731913	2.25468
343	CNP	P09543	2,3-cyclic-nucleotide 3-phosphodiesterase	10	39	27.1812	27.4776	27.1338	26.6048	27.2982	25.2929	-0.865566	0.655285
344	COA3	Q9Y2R0	Cytochrome c oxidase assembly factor 3 homolog, mitochondrial	4	23	26.1989	26.36	26.6787	26.8633	26.7351	26.3375	0.232735	0.47644
345	COG1	Q8WTW3	Conserved oligomeric Golgi complex subunit 1	5	19	24.7529	24.4942	25.7438	25.4734	25.5658	25.7332	0.593849	0.69694
346	COIL	P38432	Coilin	8	46	26.8683	26.3206	26.2619	28.0767	28.1436	27.9435	1.57102	2.83269
347	COMT	P21964	Catechol O-methyltransferase	4	22	27.2897	27.9517	27.4515	24.486	25.6437	24.3071	-2.75206	2.39298
348	COPA	P53621	Coatomer subunit alpha;Xenin;Proxenin	28	163	29.6914	29.992	29.9487	29.5723	29.4654	29.3812	-0.404393	1.68634
349	COPB1	P53618	Coatomer subunit beta	8	59	27.9813	28.1618	27.9332	27.4651	27.5976	27.4046	-0.536305	2.40081
350	COPB2	P35606	Coatomer subunit beta	11	64	28.1999	28.1239	28.2592	28.3106	28.4497	28.4417	0.206314	1.58586
351	COPE	O14579	Coatomer subunit epsilon	8	37	27.4683	28.1459	28.0231	26.4523	26.6462	26.6948	-1.28133	2.35497
352	COPG1	Q9Y678	Coatomer subunit gamma-1	12	71	28.0015	28.5603	28.4404	28.1372	28.4311	28.2296	-0.0680688	0.131242
353	COPG2	Q9UBF2	Coatomer subunit gamma-2	30	179	28.0535	28.5339	27.6142	30.6424	30.9881	30.9293	2.78606	3.20481
354	COPS2	P61201	COP9 signalosome complex subunit 2	5	17	27.1486	27.0541	27.1815	26.5194	26.6158	24.3323	-1.30558	0.808967
355	COPZ1	P61923	Coatomer subunit zeta-1	6	62	28.1301	28.2287	28.2373	28.44	28.5681	28.4475	0.286502	2.21943
356	CORO1A	P31146	Coronin-1A	3	6	24.3289	23.7845	24.4689	29.6275	27.4159	27.5505	4.00385	2.23594
357	CORO1B	Q9BR76	Coronin-1B	24	326	28.2351	27.3292	27.8741	32.7271	32.6265	32.7839	4.89972	4.28318
358	CORO1C	Q9ULV4	Coronin-1C	23	221	29.9602	30.1521	29.834	30.7173	30.7855	30.8138	0.790122	2.91147
359	CORO7	P57737	Coronin-7	4	26	26.0799	26.9453	26.2291	24.754	25.4697	25.296	-1.24485	1.65331
360	COTL1	Q14019	Coactosin-like protein	5	24	26.5471	26.5001	24.0143	26.8943	26.8184	26.5339	1.06168	0.557986
361	COX4I1	P13073	Cytochrome c oxidase subunit 4 isoform 1, mitochondrial	4	18	26.8076	26.6742	26.9027	27.1005	27.1909	26.8564	0.254437	0.995397
362	COX5B	P10606	Cytochrome c oxidase subunit 5B, mitochondrial	4	40	27.1701	27.4009	27.5424	27.1935	27.208	27.111	-0.200299	0.824029
363	CPNE1	Q99829	Copine-1	11	122	28.953	29.1556	28.805	28.7207	28.8623	28.87	-0.153536	0.611772
364	CPNE3	O75131	Copine-3	9	70	28.0523	28.6625	28.4124	27.1587	27.4923	27.3708	-1.03516	2.16209
365	CPSF1	Q10570	Cleavage and polyadenylation specificity factor subunit 1	4	25	24.6429	24.8368	24.617	25.7873	25.8974	25.9972	1.19508	3.69148
366	CPSF2	Q9P2I0	Cleavage and polyadenylation specificity factor subunit 2	8	33	26.6454	27.2102	27.3202	26.702	26.4803	26.5151	-0.492802	1.05213
367	CPSF3	Q9UKF6	Cleavage and polyadenylation specificity factor subunit 3	10	37	27.1633	26.5698	26.7402	26.9583	27.5157	26.9908	0.330468	0.583816
368	CPSF4	O95639	Cleavage and polyadenylation specificity factor subunit 4	3	11	25.0692	24.2133	23.4522	25.2562	25.2958	25.5237	1.11368	1.10383
369	CPSF6	Q16630	Cleavage and polyadenylation specificity factor subunit 6	11	77	24.469	25.0506	24.5628	30.0108	29.8152	30.0139	5.25247	4.97515
370	CPSF7	Q8N684	Cleavage and polyadenylation specificity factor subunit 7	8	49	25.6967	25.1237	26.196	27.9338	28.0473	27.7521	2.23895	2.65078
371	CPVL	Q9H3G5	Probable serine carboxypeptidase CPVL	2	5	24.2912	23.5279	23.0571	24.9541	24.6443	24.6969	1.13968	1.42537
372	CRABP2	P29373	Cellular retinoic acid-binding protein 2	6	30	27.1869	28.0995	27.521	25.321	25.6224	25.4193	-2.14818	2.8035
373	CRK	P46108	Adapter molecule crk	16	157	24.3503	23.3112	26.0785	29.8042	31.0306	31.2055	6.10011	2.57184
374	CRKL	P46109	Crk-like protein	13	100	23.9058	23.7144	24.4872	30.4225	30.2925	30.3986	6.33538	4.94309
375	CRLF3	Q8IUI8	Cytokine receptor-like factor 3	2	8	24.2264	25.3836	23.2494	24.5861	25.1978	24.8881	0.604171	0.398297
376	CRNKL1	Q9BZJ0	Crooked neck-like protein 1	8	15	26.0229	25.9753	25.5753	26.8631	27.3933	26.7985	1.16046	2.10055
377	CSDE1	O75534	Cold shock domain-containing protein E1	37	390	29.9666	30.0368	30.0637	32.7563	32.6701	32.6831	2.6808	6.55093
378	CSE1L	P55060	Exportin-2	12	132	30.5924	30.5803	30.6628	30.6239	30.8828	30.6955	0.122258	0.683426
379	CSK	P41240	Tyrosine-protein kinase CSK	10	66	27.8528	28.4837	27.9071	27.2326	27.4321	27.199	-0.793337	1.6802
380	CSNK2A1;CSNK2A3	P68400;Q8NEV1	Casein kinase II subunit alpha;Casein kinase II subunit alpha 3	16	142	28.2967	28.5879	28.6443	29.6871	30.1248	29.8054	1.36278	2.88737
381	CSNK2A2	P19784	Casein kinase II subunit alpha	10	57	26.6168	27.2306	27.0341	28.0531	28.5355	28.3283	1.34509	2.37968
382	CSNK2B	P67870	Casein kinase II subunit beta	8	53	26.4296	26.7804	26.3298	27.9494	28.7903	28.1334	1.77773	2.44782
383	CSRP2	Q16527	Cysteine and glycine-rich protein 2	4	29	27.2911	27.5089	27.5995	27.8646	27.4375	27.4868	0.129752	0.32736
384	CSTF1	Q05048	Cleavage stimulation factor subunit 1	4	34	26.1937	26.6857	26.4344	25.0751	25.2956	25.2368	-1.23542	2.85539
385	CSTF2	P33240	Cleavage stimulation factor subunit 2	12	10	24.3906	24.7205	24.076	27.1678	26.805	26.9489	2.5782	3.56611
386	CSTF2T	Q9H0L4	Cleavage stimulation factor subunit 2 tau variant	13	65	27.4109	25.8593	26.3374	28.198	28.472	28.4822	1.84817	1.77346
387	CTBP2	P56545	C-terminal-binding protein 2	7	43	27.063	27.5574	27.9287	27.438	27.1753	27.3133	-0.207505	0.32548
388	CTNNBL1	Q8WYA6	Beta-catenin-like protein 1	9	71	27.2835	27.5648	27.4854	26.9039	27.0716	26.9453	-0.47095	2.06866
389	CTNND1	O60716	Catenin delta-1	14	66	27.8373	28.0985	28.0896	27.7997	27.8187	27.8614	-0.181933	0.973658
390	CTPS1	P17812	CTP synthase 1	26	249	30.3047	30.8141	30.8326	29.9407	30.2965	30.0683	-0.548609	1.27482
391	CTR9	Q6PD62	RNA polymerase-associated protein CTR9 homolog	4	11	23.5587	25.8432	25.4555	26.0094	26.8596	26.7768	1.59611	0.990027
392	CTTN	Q14247	Src substrate cortactin	41	408	25.4751	26.2518	25.3224	32.7137	32.7745	32.7945	7.07781	4.7839
393	CTTNBP2NL	Q9P2B4	CTTNBP2 N-terminal-like protein	2	7	25.028	23.6956	23.788	24.8276	24.895	25.0062	0.739054	0.788297
394	CTU1	Q7Z7A3	Cytoplasmic tRNA 2-thiolation protein 1	3	19	25.5056	25.5397	26.0944	24.7329	25.5482	25.3539	-0.501544	0.73901
395	CUL1	Q13616	Cullin-1	4	9	26.0452	26.1002	26.1065	25.8909	26.2361	26.0434	-0.0271282	0.095299
396	CUL4B	Q13620	Cullin-4B	5	17	25.0913	24.378	24.4026	26.1322	25.6523	25.3898	1.10085	1.58359
397	CUL7	Q14999	Cullin-7	3	15	23.5676	23.6297	24.4713	29.838	28.0927	29.0142	5.09213	3.02585
398	CUX1	P39880	Homeobox protein cut-like 1	28	128	27.2588	23.9308	27.0579	29.345	29.7322	29.2622	3.36394	1.4387
399	CWC15	Q9P013	Spliceosome-associated protein CWC15 homolog	7	39	26.2033	23.4908	24.7745	28.402	28.3621	28.3646	3.55333	1.97736
400	CWF19L1	Q69YN2	CWF19-like protein 1	7	33	26.3035	26.6455	26.2444	26.4857	26.4596	26.3935	0.0484734	0.140148
401	CXorf56	Q9H5V9	UPF0428 protein CXorf56	16	164	25.5375	25.0436	26.5463	30.9377	30.7296	30.9068	5.14894	3.48923
402	CYB5R3	P00387	NADH-cytochrome b5 reductase 3;NADH-cytochrome b5 reductase 3 membrane-bound form;NADH-cytochrome b5 reductase 3 soluble form	7	112	28.9849	29.2024	29.2137	28.4647	28.5076	28.435	-0.664527	2.9956
403	CYC1	P08574	Cytochrome c1, heme protein, mitochondrial	4	32	27.035	27.5063	27.5413	27.0766	27.2526	27.0261	-0.242408	0.614546
404	CYFIP1	Q7L576	Cytoplasmic FMR1-interacting protein 1	9	45	27.3828	27.8651	27.7465	27.6054	27.5475	27.556	-0.0951557	0.259098
405	DAP3	P51398	28S ribosomal protein S29, mitochondrial	3	12	23.7953	24.872	24.9603	25.2865	24.9672	24.6359	0.42071	0.429353
406	DARS	P14868	Aspartate--tRNA ligase, cytoplasmic	20	113	29.1913	29.4203	29.4283	28.815	29.0119	28.7948	-0.47273	1.97989
407	DARS2	Q6PI48	Aspartate--tRNA ligase, mitochondrial	13	73	27.9807	28.3489	28.37	27.001	27.5926	27.253	-0.951017	1.95422
408	DAZAP1	Q96EP5	DAZ-associated protein 1	10	97	28.5353	28.8537	28.9039	28.6384	28.4512	28.5644	-0.212999	0.768514
409	DBN1	Q16643	Drebrin	7	49	27.2645	26.2221	26.5813	27.4674	27.6682	27.7479	0.938541	1.38208
410	DBNL	Q9UJU6	Drebrin-like protein	19	225	29.3633	29.4605	29.4798	30.635	30.4258	30.5634	1.10689	4.00068
411	DBT	P11182	Lipoamide acyltransferase component of branched-chain alpha-keto acid dehydrogenase complex, mitochondrial	24	154	30.1784	30.4757	30.4624	28.0033	28.1877	27.8204	-2.36837	4.1008
412	DCAF7	P61962	DDB1- and CUL4-associated factor 7	3	30	26.1731	26.7085	27.0227	25.9482	26.1802	26.0677	-0.569437	1.04115
413	DCP1A	Q9NPI6	mRNA-decapping enzyme 1A	12	55	26.2552	25.7251	25.6762	27.8099	27.6889	28.072	1.97143	3.08829
414	DCP1B	Q8IZD4	mRNA-decapping enzyme 1B	7	21	24.4018	23.0072	23.6553	27.0157	27.2298	27.0305	3.40391	2.94434
415	DCTN1	Q14203	Dynactin subunit 1	26	164	28.9753	29.2783	29.6322	29.5856	29.7309	29.6519	0.360893	0.86336
416	DCTN2	Q13561	Dynactin subunit 2	15	91	28.0443	28.4814	28.1783	28.1468	28.3787	28.3189	0.0467822	0.115832
417	DCTN4	Q9UJW0	Dynactin subunit 4	6	21	25.5028	25.5308	25.7273	24.5845	24.6941	24.3429	-1.04644	2.94678
418	DDAH1	O94760	N(G),N(G)-dimethylarginine dimethylaminohydrolase 1	3	9	26.2123	26.8927	26.4233	25.9803	24.7059	23.7155	-1.70887	1.17189
419	DDB1	Q16531	DNA damage-binding protein 1	7	59	27.9841	27.5061	27.9598	27.7839	27.9475	27.8093	0.03022	0.0642975
420	DDI2	Q5TDH0	Protein DDI1 homolog 2	8	50	27.5471	27.8521	28.1946	28.1232	27.8791	27.9743	0.127585	0.253103
421	DDOST	P39656	Dolichyl-diphosphooligosaccharide--protein glycosyltransferase 48 kDa subunit	6	46	27.0114	27.8032	27.382	26.8225	26.8449	26.8171	-0.570665	1.17231
422	DDX1	Q92499	ATP-dependent RNA helicase DDX1	26	177	30.2579	30.561	30.0943	29.4698	29.3736	29.085	-0.994985	2.28965
423	DDX10	Q13206	Probable ATP-dependent RNA helicase DDX10	7	24	26.758	25.5446	24.5684	25.8993	26.1563	25.8182	0.334276	0.200793
424	DDX17	Q92841	Probable ATP-dependent RNA helicase DDX17	51	530	32.4738	32.2162	32.3895	31.6974	31.6442	31.7105	-0.675807	3.0001
425	DDX18	Q9NVP1	ATP-dependent RNA helicase DDX18	12	38	28.645	27.1661	27.2668	27.1914	27.3624	27.044	-0.493371	0.434967
426	DDX19A	Q9NUU7	ATP-dependent RNA helicase DDX19A	18	177	29.8005	30.062	30.0729	29.8817	29.8832	29.7779	-0.130846	0.614311
427	DDX20	Q9UHI6	Probable ATP-dependent RNA helicase DDX20	10	52	27.5968	28.3879	28.0104	27.4265	27.5791	27.6046	-0.461659	0.916969
428	DDX21	Q9NR30	Nucleolar RNA helicase 2	43	564	32.6337	31.394	31.486	31.3464	31.3133	31.2857	-0.522779	0.58426
429	DDX23	Q9BUQ8	Probable ATP-dependent RNA helicase DDX23	17	57	27.7446	27.8755	27.757	28.2787	28.3766	28.3505	0.542913	3.35725
430	DDX24	Q9GZR7	ATP-dependent RNA helicase DDX24	6	13	26	25.3674	25.6583	25.3849	25.053	25.4739	-0.371319	0.765629
431	DDX27	Q96GQ7	Probable ATP-dependent RNA helicase DDX27	13	32	27.984	26.5367	26.132	25.9946	25.8277	25.9834	-0.949064	0.774318
432	DDX28	Q9NUL7	Probable ATP-dependent RNA helicase DDX28	4	6	25.9708	24.1078	23.6609	25.151	24.1646	24.8231	0.133066	0.0603456
433	DDX39A	O00148	ATP-dependent RNA helicase DDX39A	17	50	28.3368	28.7912	28.8821	28.2601	28.7004	28.5746	-0.158327	0.301396
434	DDX39B	Q13838	Spliceosome RNA helicase DDX39B	21	271	31.1842	31.4924	31.4477	31.2089	31.4033	31.2438	-0.089447	0.324338
435	DDX3X;DDX3Y	O00571;O15523	ATP-dependent RNA helicase DDX3X;ATP-dependent RNA helicase DDX3Y	53	587	32.7049	32.3499	32.3218	31.7805	31.9583	31.8497	-0.596018	1.95148
436	DDX41	Q9UJV9	Probable ATP-dependent RNA helicase DDX41	8	31	26.5751	26.8471	26.8768	26.7437	26.8395	26.7517	0.0120125	0.0405387
437	DDX42	Q86XP3	ATP-dependent RNA helicase DDX42	25	138	23.5388	23.7448	24.2743	29.8289	29.8247	29.768	5.95457	4.95614
438	DDX46	Q7L014	Probable ATP-dependent RNA helicase DDX46	49	446	30.1732	30.248	30.2959	31.9459	32.0208	31.9104	1.71999	5.43003
439	DDX47	Q9H0S4	Probable ATP-dependent RNA helicase DDX47	8	47	28.1715	26.452	27.1301	27.4455	27.1941	27.4891	0.125113	0.0873871
440	DDX5	P17844	Probable ATP-dependent RNA helicase DDX5	52	589	33.0293	32.5863	32.6346	31.5619	31.6144	31.6204	-1.15116	2.90549
441	DDX50	Q9BQ39	ATP-dependent RNA helicase DDX50	14	52	28.53	27.5994	27.6224	27.1076	27.1055	27.1988	-0.779959	1.19049
442	DDX51	Q8N8A6	ATP-dependent RNA helicase DDX51	3	6	25.5603	23.5181	25.7699	25.218	24.6676	25.1188	0.052028	0.0235694
443	DDX54	Q8TDD1	ATP-dependent RNA helicase DDX54	6	20	25.8709	25.4267	23.5583	26.1693	25.8867	25.8776	1.02591	0.648523
444	DDX56	Q9NY93	Probable ATP-dependent RNA helicase DDX56	8	40	27.5872	26.648	26.5576	27.2042	26.7827	27.1123	0.102102	0.1041
445	DDX6	P26196	Probable ATP-dependent RNA helicase DDX6	14	113	28.6445	28.7753	29.1478	29.2973	29.3643	29.2834	0.459125	1.40052
446	DEK	P35659	Protein DEK	6	43	27.1616	27.115	27.0953	27.0734	27.1915	26.9196	-0.0624733	0.314872
447	DENND4C	Q5VZ89	DENN domain-containing protein 4C	9	36	23.9866	23.0686	23.7294	26.7405	26.6399	26.613	3.06961	3.42873
448	DERA	Q9Y315	Deoxyribose-phosphate aldolase	2	10	25.6527	26.3753	26.0819	24.6478	25.4351	25.2093	-0.939245	1.39341
449	DGCR14	Q96DF8	Protein DGCR14	6	10	24.4103	23.3233	23.9933	25.6661	25.7642	25.7065	1.80331	2.32206
450	DGCR8	Q8WYQ5	Microprocessor complex subunit DGCR8	6	10	23.1536	24.3334	24.6238	27.353	27.0428	27.421	3.2353	2.6514
451	DHRS4	Q9BTZ2	Dehydrogenase/reductase SDR family member 4	4	22	26.5803	26.9876	26.9297	25.9299	25.681	25.7917	-1.03163	2.67256
452	DHRS7B	Q6IAN0	Dehydrogenase/reductase SDR family member 7B	3	25	25.3705	25.5811	25.7045	24.4465	24.8342	24.3973	-0.992698	2.37615
453	DHX15	O43143	Pre-mRNA-splicing factor ATP-dependent RNA helicase DHX15	17	116	29.1224	29.0424	28.8721	28.7191	28.5075	28.6648	-0.381817	1.76431
454	DHX16	O60231	Putative pre-mRNA-splicing factor ATP-dependent RNA helicase DHX16	14	43	26.1684	26.573	26.7773	27.4465	27.8391	27.7335	1.16681	2.26017
455	DHX29	Q7Z478	ATP-dependent RNA helicase DHX29	14	74	25.1111	25.8208	26.0097	28.7355	29.2203	29.3372	3.45051	3.32643
456	DHX30	Q7L2E3	Putative ATP-dependent RNA helicase DHX30	15	51	28.2754	28.1019	27.7836	27.1988	27.2951	27.2008	-0.822098	2.29462
457	DHX38	Q92620	Pre-mRNA-splicing factor ATP-dependent RNA helicase PRP16	9	45	26.3768	27.2474	26.3067	27.4424	27.3492	27.3589	0.739838	1.14444
458	DHX40	Q8IX18	Probable ATP-dependent RNA helicase DHX40	2	11	25.3222	25.3303	24.8265	24.5278	24.6891	23.3918	-0.956734	1.0186
459	DHX9	Q08211	ATP-dependent RNA helicase A	46	291	31.9299	31.3305	31.282	30.2279	30.2486	30.2083	-1.28584	2.45336
460	DIAPH1	O60610	Protein diaphanous homolog 1	13	61	27.2799	27.6264	27.484	27.7462	27.651	27.834	0.280324	1.16042
461	DIAPH3	Q9NSV4	Protein diaphanous homolog 3	4	18	24.0152	23.812	24.3681	26.3579	26.2268	26.2586	2.216	3.72783
462	DICER1	Q9UPY3	Endoribonuclease Dicer	5	13	24.7178	25.0503	24.1183	24.7024	24.94	24.8776	0.211192	0.305148
463	DIDO1	Q9BTC0	Death-inducer obliterator 1	20	79	26.5275	25.4373	24.6861	29.2677	28.902	29.4078	3.64221	2.55332
464	DIMT1	Q9UNQ2	Probable dimethyladenosine transferase	4	25	26.2853	26.1526	26.5311	25.6832	25.8662	25.7141	-0.568484	1.98778
465	DIP2A	Q14689	Disco-interacting protein 2 homolog A	3	21	23.6027	23.2305	23.5028	26.574	26.5099	26.5047	3.08418	4.96343
466	DIP2B	Q9P265	Disco-interacting protein 2 homolog B	5	24	24.2531	23.3843	22.9366	25.6385	25.5048	25.1866	1.91863	2.02814
467	DIS3	Q9Y2L1	Exosome complex exonuclease RRP44	21	127	28.6862	29.0805	28.8612	28.4715	28.729	28.4567	-0.323556	1.05337
468	DKC1	O60832	H/ACA ribonucleoprotein complex subunit 4	14	90	29.6166	26.9913	27.3629	28.2087	28.4027	28.2289	0.289888	0.129425
469	DLAT	P10515	Dihydrolipoyllysine-residue acetyltransferase component of pyruvate dehydrogenase complex, mitochondrial	5	15	26.0357	26.3215	26.1844	23.6811	24.5374	23.6638	-2.21975	2.75011
470	DLD	P09622	Dihydrolipoyl dehydrogenase, mitochondrial	14	73	28.5189	28.7756	28.9364	28.9016	28.8498	28.925	0.148487	0.528941
471	DLG1	Q12959	Disks large homolog 1	6	37	24.0519	23.9457	24.0703	27.2398	27.0964	27.2667	3.17834	5.9644
472	DLG5	Q8TDM6	Disks large homolog 5	9	20	23.405	23.0433	23.5983	26.7392	26.5808	26.7745	3.3493	4.37473
473	DLGAP5	Q15398	Disks large-associated protein 5	10	48	27.2775	25.9016	26.2389	27.7531	27.9099	28.0361	1.42706	1.55673
474	DMAP1	Q9NPF5	DNA methyltransferase 1-associated protein 1	3	11	24.1934	25.8873	23.8643	25.7323	26.1594	26.0538	1.33348	0.976752
475	DNAAF5	Q86Y56	Dynein assembly factor 5, axonemal	4	37	25.7343	26.6023	26.4856	26.0619	25.7938	25.9163	-0.35006	0.547504
476	DNAJA1	P31689	DnaJ homolog subfamily A member 1	13	163	29.1905	29.5076	29.8354	29.0327	29.1111	28.95	-0.479921	1.17593
477	DNAJA2	O60884	DnaJ homolog subfamily A member 2	8	35	27.6398	28.2238	27.9619	27.3048	27.1379	27.1957	-0.729024	1.8447
478	DNAJA3	Q96EY1	DnaJ homolog subfamily A member 3, mitochondrial	5	18	27.407	27.1692	27.159	25.5079	25.7402	25.3144	-1.72424	3.51567
479	DNAJB1	P25685	DnaJ homolog subfamily B member 1	9	69	26.4884	27.1508	27.0417	28.055	28.096	28.0792	1.18311	2.34618
480	DNAJB11	Q9UBS4	DnaJ homolog subfamily B member 11	8	19	25.8942	26.0173	26.2838	24.0349	23.3334	24.6975	-2.0432	2.11942
481	DNAJB12	Q9NXW2	DnaJ homolog subfamily B member 12	2	5	24.2208	23.6202	23.8493	26.1541	26.1467	26.3449	2.3185	3.61741
482	DNAJC19	Q96DA6	Mitochondrial import inner membrane translocase subunit TIM14	6	54	27.8713	28.7035	28.6351	27.4322	27.441	27.5894	-0.915728	1.55295
483	DNAJC7	Q99615	DnaJ homolog subfamily C member 7	6	29	26.9941	26.9035	27.0787	27.2166	27.2825	26.9751	0.165988	0.713766
484	DNAJC8	O75937	DnaJ homolog subfamily C member 8	5	20	24.3993	23.7802	22.9696	26.8333	26.831	26.883	3.13272	2.78532
485	DNM1L	O00429	Dynamin-1-like protein	8	34	23.8424	22.7668	25.955	26.1754	26.3762	26.5377	2.17508	1.08522
486	DNM2;DNM1;DNM3	P50570;Q05193;Q9UQ16	Dynamin-2;Dynamin-1;Dynamin-3	8	47	26.9457	27.3971	27.2629	26.9151	27.078	26.9834	-0.20974	0.670672
487	DNMBP	Q6XZF7	Dynamin-binding protein	8	32	23.2721	23.7955	24.0305	27.1171	26.9134	27.2648	3.3991	3.79709
488	DNMT1	P26358	DNA (cytosine-5)-methyltransferase 1	26	183	29.1891	28.7798	28.9848	29.5262	29.4071	29.627	0.535538	1.78932
489	DOCK11	Q5JSL3	Dedicator of cytokinesis protein 11	3	3	23.4812	24.4995	23.1425	24.448	24.4641	24.7975	0.86211	0.953008
490	DOCK7	Q96N67	Dedicator of cytokinesis protein 7	7	22	26.214	26.3039	26.9274	27.0337	26.6818	26.5978	0.289312	0.481608
491	DPF2	Q92785	Zinc finger protein ubi-d4	3	17	25.0798	24.0994	24.8892	24.8956	24.8184	25.0703	0.238657	0.31576
492	DPH2	Q9BQC3	Diphthamide biosynthesis protein 2	3	14	24.9769	25.819	25.2514	25.5958	23.7128	24.1037	-0.878356	0.633334
493	DPY30	Q9C005	Protein dpy-30 homolog	5	25	26.0367	26.9212	25.9629	25.8158	25.9358	25.7945	-0.458199	0.668266
494	DPYSL2	Q16555	Dihydropyrimidinase-related protein 2	18	218	29.0075	29.3702	29.4059	30.3147	30.4859	30.5074	1.1748	2.94414
495	DPYSL3	Q14195	Dihydropyrimidinase-related protein 3	20	181	28.5328	28.7793	28.6779	29.878	30.2017	29.9875	1.35907	3.47477
496	DPYSL4	O14531	Dihydropyrimidinase-related protein 4	8	36	25.7919	23.8308	26.0537	27.206	27.3575	27.31	2.06571	1.37239
497	DPYSL5	Q9BPU6	Dihydropyrimidinase-related protein 5	10	71	27.6766	27.9663	28.4625	27.9403	27.9739	27.9426	-0.082901	0.132857
498	DRG1	Q9Y295	Developmentally-regulated GTP-binding protein 1	10	60	26.812	27.3549	27.2675	28.7879	28.7949	28.7392	1.62921	3.18668
499	DRG2	P55039	Developmentally-regulated GTP-binding protein 2	6	24	25.4612	25.6451	25.8825	25.1041	25.4097	24.6393	-0.611912	1.12833
500	DSG2	Q14126	Desmoglein-2	11	67	23.2376	25.0153	25.1783	27.9084	27.7774	28.0007	3.41843	2.265
501	DSP	P15924	Desmoplakin	40	148	29.6222	29.6879	29.5189	29.0354	28.8305	28.9532	-0.670003	3.01234
502	DST	Q03001	Dystonin	12	38	23.9137	23.4292	27.1029	28.3105	27.8998	27.7284	3.16432	1.27389
503	DSTN	P60981	Destrin	6	31	26.9777	27.6711	27.2578	25.8969	26.0187	25.8802	-1.37029	2.57572
504	DTNA;DTNB	Q9Y4J8;O60941	Dystrobrevin alpha;Dystrobrevin beta	2	18	24.0331	23.323	23.7292	25.9273	25.7243	26.1754	2.24725	3.11526
505	DUS3L	Q96G46	tRNA-dihydrouridine(47) synthase [NAD(P)(+)]-like	10	63	27.8267	27.9013	27.823	27.9832	27.7757	27.9751	0.0609735	0.349192
506	DVL1;DVL1P1	O14640;P54792	Segment polarity protein dishevelled homolog DVL-1;Putative segment polarity protein dishevelled homolog DVL1P1	11	71	24.4538	23.3566	24.0419	29.7986	29.8646	29.7796	5.86351	4.27685
507	DVL2	O14641	Segment polarity protein dishevelled homolog DVL-2	20	175	24.0352	24.1966	23.7636	31.1177	30.8454	31.1969	7.05488	5.74554
508	DVL3	Q92997	Segment polarity protein dishevelled homolog DVL-3	13	88	24.0214	24.4851	24.5721	29.3574	29.2858	29.4888	5.01779	4.99746
509	DYNC1H1	Q14204	Cytoplasmic dynein 1 heavy chain 1	74	411	30.618	30.8714	30.8608	30.1095	30.2822	30.1871	-0.590481	2.43954
510	DYNC1I2	Q13409	Cytoplasmic dynein 1 intermediate chain 2	6	59	28.3662	28.779	28.8145	29.4534	29.1789	29.2292	0.633928	1.71903
511	DYNC1LI1	Q9Y6G9	Cytoplasmic dynein 1 light intermediate chain 1	9	35	27.043	27.3089	27.3857	27.8981	27.7363	27.6711	0.522662	1.87091
512	DYNC1LI2	O43237	Cytoplasmic dynein 1 light intermediate chain 2	10	48	26.3112	26.162	26.5936	27.422	27.0951	27.3182	0.92281	2.35689
513	DYNLRB1;DYNLRB2	Q9NP97;Q8TF09	Dynein light chain roadblock-type 1;Dynein light chain roadblock-type 2	6	48	28.8087	29.0196	29.0191	28.4239	28.3419	28.4565	-0.541679	2.64502
514	EBNA1BP2	Q99848	Probable rRNA-processing protein EBP2	11	76	29.3672	27.9101	28.0453	28.0076	28.1844	28.1073	-0.341092	0.295725
515	ECD	O95905	Protein SGT1	7	31	25.6161	26.1853	25.5965	26.3324	26.7027	26.7016	0.779579	1.56565
516	ECHS1	P30084	Enoyl-CoA hydratase, mitochondrial	9	100	29.1826	29.1945	29.4301	28.8917	29.0961	28.8763	-0.314347	1.36826
517	EDC3	Q96F86	Enhancer of mRNA-decapping protein 3	12	91	27.5577	27.7176	28.0651	28.337	28.2913	28.5553	0.614405	1.64429
518	EDC4	Q6P2E9	Enhancer of mRNA-decapping protein 4	19	173	28.852	28.8035	29.0824	29.9555	29.8835	29.9906	1.03054	3.44893
519	EDF1	O60869	Endothelial differentiation-related factor 1	29	531	29.2196	29.0709	29.3435	36.5176	36.3754	36.4333	7.23077	6.86226
520	EDRF1	Q3B7T1	Erythroid differentiation-related factor 1	3	12	24.7096	23.8549	24.6359	25.8076	25.8689	25.787	1.42103	2.17878
521	EEF1A1;EEF1A1P5	P68104;Q5VTE0	Elongation factor 1-alpha 1;Putative elongation factor 1-alpha-like 3	30	639	33.5991	33.7885	33.7013	33.7525	33.975	33.8474	0.162036	0.893507
522	EEF1B2	P24534	Elongation factor 1-beta	10	109	30.2159	30.4728	30.6025	30.0512	29.7532	29.8483	-0.546191	1.72011
523	EEF1D	P29692	Elongation factor 1-delta	19	316	32.3541	32.552	32.8212	32.1316	32.137	32.1096	-0.449698	1.53035
524	EEF1E1	O43324	Eukaryotic translation elongation factor 1 epsilon-1	2	22	25.7181	26.5948	26.0955	25.9334	25.8928	25.675	-0.302393	0.495498
525	EEF1G	P26641	Elongation factor 1-gamma	26	497	32.2502	32.6039	32.597	32.3256	32.36	32.2115	-0.184695	0.669744
526	EEF2	P13639	Elongation factor 2	60	939	32.7734	33.1016	32.9652	32.7225	32.8549	32.7493	-0.171135	0.761142
527	EFHD2	Q96C19	EF-hand domain-containing protein D2	6	32	23.7779	24.0699	24.0358	28.1778	28.2329	28.2665	4.26454	5.81869
528	EFTUD1	Q7Z2Z2	Elongation factor Tu GTP-binding domain-containing protein 1	7	14	23.6298	22.6904	23.0796	25.9825	25.9023	25.7318	2.73897	3.1992
529	EFTUD2	Q15029	116 kDa U5 small nuclear ribonucleoprotein component	35	264	29.7157	29.7669	29.839	29.7821	29.9847	29.7772	0.074145	0.407893
530	EGLN1	Q9GZT9	Egl nine homolog 1	6	35	27.3399	27.4675	27.8618	27.9699	27.5776	27.6555	0.177874	0.377827
531	EHBP1	Q8NDI1	EH domain-binding protein 1	11	22	23.3001	23.4111	23.0449	27.8643	27.4573	27.7104	4.42525	4.9853
532	EHD4	Q9H223	EH domain-containing protein 4	7	23	26.5062	27.1437	26.794	23.9128	25.0598	23.7341	-2.57908	2.32292
533	EIF1AX;EIF1AY	P47813;O14602	Eukaryotic translation initiation factor 1A, X-chromosomal;Eukaryotic translation initiation factor 1A, Y-chromosomal	6	71	28.9031	28.6812	29.1674	28.1095	28.1728	27.9399	-0.843181	2.23805
534	EIF2A	Q9BY44	Eukaryotic translation initiation factor 2A;Eukaryotic translation initiation factor 2A, N-terminally processed	18	162	28.9921	29.0326	28.99	29.7228	29.9316	29.866	0.83523	3.72288
535	EIF2AK2	P19525	Interferon-induced, double-stranded RNA-activated protein kinase	10	37	26.7959	26.4256	26.3002	26.1649	26.3915	26.187	-0.259452	0.717352
536	EIF2B1	Q14232	Translation initiation factor eIF-2B subunit alpha	3	10	25.7221	25.7674	25.7204	24.805	23.5012	23.8975	-1.66875	1.90523
537	EIF2B3	Q9NR50	Translation initiation factor eIF-2B subunit gamma	10	58	27.0065	27.2921	27.057	27.5404	27.3092	27.6007	0.364909	1.36325
538	EIF2B4	Q9UI10	Translation initiation factor eIF-2B subunit delta	7	22	25.9855	26.0481	26.6094	25.8792	25.9451	26.2264	-0.197419	0.366529
539	EIF2B5	Q13144	Translation initiation factor eIF-2B subunit epsilon	3	19	25.8658	26.6514	26.3407	25.8881	26.4205	26.5189	-0.0101344	0.0111058
540	EIF2D	P41214	Eukaryotic translation initiation factor 2D	6	11	23.9276	24.0677	25.2467	26.144	25.9639	25.8476	1.57118	1.67311
541	EIF2S1	P05198	Eukaryotic translation initiation factor 2 subunit 1	20	228	30.9617	31.0528	31.1251	30.2783	30.4821	30.4059	-0.657749	3.00938
542	EIF2S2	P20042	Eukaryotic translation initiation factor 2 subunit 2	11	84	28.292	28.2168	28.2292	27.9547	28.0543	28.0655	-0.221167	2.19722
543	EIF2S3;EIF2S3L	P41091;Q2VIR3	Eukaryotic translation initiation factor 2 subunit 3;Putative eukaryotic translation initiation factor 2 subunit 3-like protein	16	163	30.1214	30.7123	30.6257	30.089	30.1387	29.9256	-0.435315	1.04797
544	EIF3A	Q14152	Eukaryotic translation initiation factor 3 subunit A	73	657	30.6442	30.7786	30.893	33.2814	33.052	33.1501	2.38925	4.77648
545	EIF3B	P55884	Eukaryotic translation initiation factor 3 subunit B	24	217	29.2812	29.3854	29.2357	30.5095	30.705	30.6009	1.30434	4.26817
546	EIF3C;EIF3CL	Q99613;B5ME19	Eukaryotic translation initiation factor 3 subunit C;Eukaryotic translation initiation factor 3 subunit C-like protein	45	442	30.8035	31.0517	31.1439	31.6876	31.731	31.7298	0.716452	2.65443
547	EIF3D	O15371	Eukaryotic translation initiation factor 3 subunit D	23	268	29.9097	29.8816	30.0437	30.2992	30.3816	30.2944	0.380071	2.56642
548	EIF3E	P60228	Eukaryotic translation initiation factor 3 subunit E	9	65	27.381	28.0001	27.8252	28.8031	28.9596	28.6663	1.07425	2.21463
549	EIF3F	O00303	Eukaryotic translation initiation factor 3 subunit F	15	113	28.3978	28.6764	28.7145	28.5822	29.0844	28.5523	0.143368	0.290819
550	EIF3G	O75821	Eukaryotic translation initiation factor 3 subunit G	12	127	29.3745	28.9673	29.5151	30.731	30.905	30.949	1.57603	3.05375
551	EIF3H	O15372	Eukaryotic translation initiation factor 3 subunit H	11	71	26.6204	26.9605	27.382	29.0314	28.8818	27.9248	1.62503	1.77673
552	EIF3I	Q13347	Eukaryotic translation initiation factor 3 subunit I	22	283	30.1435	30.0865	30.521	31.7532	31.8296	31.7064	1.51271	3.36887
553	EIF3J	O75822	Eukaryotic translation initiation factor 3 subunit J	4	11	24.0359	25.0411	23.8128	26.9418	26.8119	26.885	2.58295	2.61293
554	EIF3K	Q9UBQ5	Eukaryotic translation initiation factor 3 subunit K	5	14	23.841	23.9205	23.4191	27.946	27.8796	27.793	4.146	4.86119
555	EIF3L	Q9Y262	Eukaryotic translation initiation factor 3 subunit L	8	42	26.5323	26.6676	27.2598	27.4547	27.7364	27.5234	0.751581	1.46013
556	EIF3M	Q7L2H7	Eukaryotic translation initiation factor 3 subunit M	4	42	27.7608	27.7038	27.7079	27.3323	27.2924	26.7445	-0.601156	1.46417
557	EIF4A1	P60842	Eukaryotic initiation factor 4A-I	33	796	33.8626	33.8826	33.994	33.1199	33.2808	33.1737	-0.7216	3.49194
558	EIF4A2	Q14240	Eukaryotic initiation factor 4A-II;Eukaryotic initiation factor 4A-II, N-terminally processed	15	15	26.7949	24.1082	26.9375	26.5068	26.4679	26.2339	0.455977	0.188686
559	EIF4A3	P38919	Eukaryotic initiation factor 4A-III;Eukaryotic initiation factor 4A-III, N-terminally processed	19	160	30.2309	30.573	30.4629	30.063	30.2749	30.0483	-0.293508	1.10783
560	EIF4B	P23588	Eukaryotic translation initiation factor 4B	38	456	22.629	20.5946	22.6037	33.3708	33.0733	33.245	11.2873	4.11401
561	EIF4E	P06730	Eukaryotic translation initiation factor 4E	5	35	28.0626	28.3825	28.1061	28.2667	28.2604	28.1276	0.034509	0.113875
562	EIF4E2	O60573	Eukaryotic translation initiation factor 4E type 2	11	81	24.2375	23.0345	23.1258	29.4606	29.5018	29.5744	6.04636	4.00392
563	EIF4ENIF1	Q9NRA8	Eukaryotic translation initiation factor 4E transporter	16	86	24.0229	24.7327	23.5806	29.3919	29.2479	29.4421	5.2486	3.98537
564	EIF4G1	Q04637	Eukaryotic translation initiation factor 4 gamma 1	72	724	30.3287	30.4823	30.6471	33.9683	33.9289	33.9289	3.45599	5.50689
565	EIF4G2	P78344	Eukaryotic translation initiation factor 4 gamma 2	32	231	29.7048	29.7044	29.7411	29.5944	29.8125	29.7669	0.00782204	0.0393708
566	EIF4G3	O43432	Eukaryotic translation initiation factor 4 gamma 3	33	147	26.5919	27.6269	27.6861	30.1427	30.1349	30.8923	3.08834	2.68183
567	EIF4H	Q15056	Eukaryotic translation initiation factor 4H	6	62	28.8401	28.9427	28.7571	28.6589	28.869	28.8899	-0.0407111	0.168441
568	EIF5	P55010	Eukaryotic translation initiation factor 5	27	313	27.9215	28.2633	28.1933	32.3753	32.3013	32.2918	4.19674	5.58912
569	EIF5A;EIF5AL1;EIF5A2	P63241;Q6IS14;Q9GZV4	Eukaryotic translation initiation factor 5A-1;Eukaryotic translation initiation factor 5A-1-like;Eukaryotic translation initiation factor 5A-2	12	187	30.4583	30.3033	30.4938	30.1442	30.4467	30.3868	-0.0925878	0.351556
570	EIF5B	O60841	Eukaryotic translation initiation factor 5B	25	178	26.9981	26.5213	27.6315	30.7882	30.852	30.9661	3.81845	3.51878
571	EIF6	P56537	Eukaryotic translation initiation factor 6	8	44	28.922	27.5062	27.4885	26.6944	26.8894	26.953	-1.12662	1.10083
572	ELAC2	Q9BQ52	Zinc phosphodiesterase ELAC protein 2	24	121	29.0109	29.5551	29.3432	28.9937	29.23	29.042	-0.21453	0.544953
573	ELAVL1	Q15717	ELAV-like protein 1	18	224	30.4482	30.3636	30.5099	30.2353	30.4327	30.2052	-0.149459	0.835368
574	ELF2	Q15723	ETS-related transcription factor Elf-2	5	12	24.2604	24.4524	25.0251	25.3279	25.2932	25.344	0.742368	1.49315
575	ELMSAN1	Q6PJG2	ELM2 and SANT domain-containing protein 1	2	8	23.4851	24.237	22.9408	26.0968	24.5382	25.5847	1.85227	1.45103
576	ELP4	Q96EB1	Elongator complex protein 4	7	30	24.8689	23.5838	24.0118	27.644	27.2195	27.5402	3.31306	2.94048
577	EMD	P50402	Emerin	11	120	28.9704	29.1898	29.2026	29.4372	29.3598	29.4811	0.305106	1.66712
578	EML1	O00423	Echinoderm microtubule-associated protein-like 1	5	13	22.9084	25.8658	25.6135	26.0484	26.3899	26.0968	1.38249	0.656973
579	EML4	Q9HC35	Echinoderm microtubule-associated protein-like 4	17	121	28.1911	28.4973	28.8104	29.7758	30.032	29.9672	1.42536	2.73287
580	EMSY	Q7Z589	Protein EMSY	13	19	23.7211	24.9012	24.4483	27.1504	27.0652	27.1081	2.75104	2.87471
581	ENAH	Q8N8S7	Protein enabled homolog	8	57	26.2748	25.9029	26.5437	28.0461	27.7299	28.0984	1.71768	2.84886
582	ENO1	P06733	Alpha-enolase	25	276	30.7823	30.5273	30.9853	30.5617	30.7634	30.6034	-0.122169	0.346811
583	EP300	Q09472	Histone acetyltransferase p300	3	10	24.8693	25.5503	25.3723	24.9266	24.8383	25.0411	-0.328646	0.70697
584	EP400	Q96L91	E1A-binding protein p400	12	38	23.6296	25.6085	25.8618	27.4192	27.1026	27.3164	2.24609	1.46433
585	EPB41	P11171	Protein 4.1	30	187	27.9125	28.1186	28.1387	30.8246	30.7168	30.7284	2.70002	5.33847
586	EPB41L2	O43491	Band 4.1-like protein 2	39	354	29.9499	29.9679	30.5601	31.7973	31.8271	31.8186	1.65503	2.92857
587	EPB41L3	Q9Y2J2	Band 4.1-like protein 3;Band 4.1-like protein 3, N-terminally processed	39	319	28.9422	29.3408	29.3266	31.8375	31.8204	31.7736	2.6073	4.4122
588	EPHA2;EPHB1;EPHA4;EPHB4;EPHA7;EPHB3;EPHA6;EPHB2	P29317;P54762;P54764;P54760;Q15375;P54753;Q9UF33;P29323	Ephrin type-A receptor 2;Ephrin type-B receptor 1;Ephrin type-A receptor 4;Ephrin type-B receptor 4;Ephrin type-A receptor 7;Ephrin type-B receptor 3;Ephrin type-A receptor 6;Ephrin type-B receptor 2	2	9	24.0769	23.7164	24.236	25.6027	25.9632	25.7797	1.77211	3.17227
589	EPPK1	P58107	Epiplakin	43	267	30.462	30.1477	30.4648	29.4454	29.6462	29.7103	-0.757519	2.33964
590	EPRS	P07814	Bifunctional glutamate/proline--tRNA ligase;Glutamate--tRNA ligase;Proline--tRNA ligase	77	761	31.6424	31.9423	31.9865	31.729	31.8791	31.8108	-0.0507946	0.164162
591	EPS15	P42566	Epidermal growth factor receptor substrate 15	13	60	23.8499	23.3294	22.6719	28.6632	28.9261	28.6983	5.47883	4.00886
592	EPS15L1	Q9UBC2	Epidermal growth factor receptor substrate 15-like 1	23	136	24.202	23.9558	24.1525	30.4527	30.3605	30.3684	6.29038	6.78821
593	ERAL1	O75616	GTPase Era, mitochondrial	4	9	25.7685	26.2039	26.0444	25.4789	25.5635	24.2335	-0.913617	0.953792
594	ERBB2IP	Q96RT1	Protein LAP2	20	84	24.2502	25.1344	25.5895	29.2299	29.0753	29.6717	4.33426	3.2563
595	ERC1	Q8IUD2	ELKS/Rab6-interacting/CAST family member 1	22	110	23.3594	24.0139	24.4472	29.2314	29.202	29.3484	5.32039	4.11906
596	ERCC6L	Q2NKX8	DNA excision repair protein ERCC-6-like	9	48	25.4861	25.6491	26.2413	28.1832	28.251	28.3902	2.48267	3.32577
597	ERH	P84090	Enhancer of rudimentary homolog	6	95	29.7021	29.0699	29.4595	30.6885	30.7222	30.8855	1.35491	2.6561
598	ERP44	Q9BS26	Endoplasmic reticulum resident protein 44	9	77	27.5887	27.4675	27.9771	27.5186	27.555	27.4031	-0.185552	0.506389
599	ESD	P10768	S-formylglutathione hydrolase	17	215	30.5608	30.6633	30.695	29.7965	29.8681	29.9269	-0.775867	3.82395
600	ESF1	Q9H501	ESF1 homolog	24	107	26.3227	23.6869	24.6626	29.3946	29.5113	29.3615	4.53173	2.37871
601	ESYT1	Q9BSJ8	Extended synaptotagmin-1	16	60	27.5201	27.1204	27.7427	28.5886	28.7325	28.5742	1.17068	2.46219
602	ESYT2	A0FGR8	Extended synaptotagmin-2	7	23	26.2051	26.6357	26.6043	26.6887	26.8631	27.0175	0.374758	1.04783
603	ETFA	P13804	Electron transfer flavoprotein subunit alpha, mitochondrial	19	176	29.8179	30.0563	30.2443	29.2645	29.3911	28.9413	-0.840514	2.00379
604	ETFB	P38117	Electron transfer flavoprotein subunit beta	15	188	29.8164	30.0436	30.1132	29.941	29.8478	29.6974	-0.162332	0.640945
605	EWSR1	Q01844	RNA-binding protein EWS	4	9	26.8963	25.3805	25.0763	23.4408	24.3659	24.7895	-1.58563	1.08112
606	EXOC2	Q96KP1	Exocyst complex component 2	2	8	23.4777	22.9097	22.6702	24.0787	23.9901	23.6034	0.871529	1.44448
607	EXOC4	Q96A65	Exocyst complex component 4	6	14	25.2204	25.1122	24.347	26.1844	25.4061	25.538	0.816296	1.05004
608	EXOSC1	Q9Y3B2	Exosome complex component CSL4	4	17	25.9968	25.9988	26.2723	26.4098	26.3222	26.1018	0.188622	0.659697
609	EXOSC10	Q01780	Exosome component 10	16	121	28.2892	28.4354	28.8152	29.2015	29.2371	29.3022	0.733697	1.99876
610	EXOSC3	Q9NQT5	Exosome complex component RRP40	5	62	27.869	28.0496	28.487	28.128	28.2182	28.0422	-0.00575256	0.00995421
611	EXOSC4	Q9NPD3	Exosome complex component RRP41	3	4	24.4297	25.1377	24.6507	23.8408	25.051	23.0791	-0.749098	0.54143
612	EXOSC8	Q96B26	Exosome complex component RRP43	2	18	25.4952	26.0611	26.2512	25.6008	25.8207	25.9281	-0.152616	0.244462
613	EXOSC9	Q06265	Exosome complex component RRP45	3	24	24.1233	24.1454	25.6273	25.756	26.0788	25.8301	1.25625	1.16474
614	EYA3	Q99504	Eyes absent homolog 3	3	15	23.9609	24.5919	24.6924	25.961	25.7332	26.0644	1.50448	2.42234
615	EZR	P15311	Ezrin	16	78	26.8347	27.2307	26.844	29.1257	29.0858	28.767	2.02304	3.51517
616	FABP5	Q01469	Fatty acid-binding protein, epidermal	9	49	27.8644	28.2564	28.2387	27.2518	27.3202	27.1343	-0.884443	2.50634
617	FAF2	Q96CS3	FAS-associated factor 2	8	29	24.0418	25.2852	24.0042	27.8819	27.8844	28.0118	3.48227	2.9253
618	FAHD1	Q6P587	Acylpyruvase FAHD1, mitochondrial	4	22	25.8418	26.5316	25.7921	26.1212	23.634	24.8767	-1.17786	0.711023
619	FAM107B	Q9H098	Protein FAM107B	3	22	23.7597	23.9013	25.1773	26.3686	26.3302	26.4118	2.0908	2.00895
620	FAM120A	Q9NZB2	Constitutive coactivator of PPAR-gamma-like protein 1	10	31	26.897	24.4031	26.6125	26.7372	26.4916	26.6455	0.653921	0.341909
621	FAM175B	Q15018	BRISC complex subunit Abro1	5	24	26.2646	26.4915	26.6861	26.5571	26.3062	26.1636	-0.138417	0.341904
622	FAM195A	Q9BUT9	Protein FAM195A	6	32	24.4246	23.7652	24.6751	27.7091	26.2137	26.4504	2.50277	2.01676
623	FAM195B	C9JLW8	Protein FAM195B	4	11	24.4712	24.2389	23.359	25.8681	25.4365	25.5271	1.58756	1.92188
624	FAM21A	Q641Q2	WASH complex subunit FAM21A	30	169	23.1297	23.4762	23.5367	30.3536	30.2115	30.2871	6.90323	6.08024
625	FAM21C	Q9Y4E1	WASH complex subunit FAM21C	26	13	23.3868	24.4028	23.8173	26.6048	26.4859	26.5669	2.68362	3.08307
626	FAM32A	Q9Y421	Protein FAM32A	4	11	24.5857	24.373	24.5577	27.2525	27.0109	26.8292	2.52544	4.26052
627	FAM50A	Q14320	Protein FAM50A	3	16	23.7123	24.6092	24.7595	26.0896	26.2192	26.578	1.93525	2.24601
628	FAM83D	Q9H4H8	Protein FAM83D	8	36	23.7444	25.6136	24.7763	27.1915	27.1303	27.0914	2.42632	1.95967
629	FAM96B	Q9Y3D0	Mitotic spindle-associated MMXD complex subunit MIP18	6	47	27.3267	27.554	27.7045	26.915	26.8374	27.1519	-0.560306	1.74339
630	FAM98A	Q8NCA5	Protein FAM98A	4	6	23.6045	23.9629	23.6699	24.0348	24.525	23.947	0.423198	0.938408
631	FAM98B	Q52LJ0	Protein FAM98B	5	27	27.1166	27.1567	26.6298	23.1672	25.7256	25.9069	-2.03448	1.06156
632	FAR1	Q8WVX9	Fatty acyl-CoA reductase 1	4	14	26.0791	26.351	26.2169	25.4465	25.7065	25.6899	-0.601358	2.19461
633	FARSA	Q9Y285	Phenylalanine--tRNA ligase alpha subunit	20	226	30.742	30.7296	30.9633	30.4142	30.2083	30.1585	-0.551298	2.14261
634	FARSB	Q9NSD9	Phenylalanine--tRNA ligase beta subunit	21	221	29.9809	30.5446	30.4181	29.745	29.881	29.7235	-0.531392	1.39406
635	FASN	P49327	Fatty acid synthase;[Acyl-carrier-protein] S-acetyltransferase;[Acyl-carrier-protein] S-malonyltransferase;3-oxoacyl-[acyl-carrier-protein] synthase;3-oxoacyl-[acyl-carrier-protein] reductase;3-hydroxyacyl-[acyl-carrier-protein] dehydratase;Enoyl-[acyl-carrier-protein] reductase;Oleoyl-[acyl-carrier-protein] hydrolase	130	1670	34.2645	34.6076	34.4521	33.5662	33.9093	33.7885	-0.686745	2.08325
636	FAU	P62861	40S ribosomal protein S30	4	72	29.9694	29.7841	29.5407	30.236	29.9222	30.001	0.288378	0.860211
637	FBL	P22087	rRNA 2-O-methyltransferase fibrillarin	13	159	31.3061	29.9161	29.7977	30.0434	30.1814	29.929	-0.288701	0.231212
638	FDPS	P14324	Farnesyl pyrophosphate synthase	6	51	28.0799	28.1379	28.2067	27.3998	27.7448	28.0783	-0.400527	0.940106
639	FDXR	P22570	NADPH:adrenodoxin oxidoreductase, mitochondrial	14	85	28.004	28.1895	28.3862	28.5918	28.3307	28.4701	0.270957	0.948621
640	FECH	P22830	Ferrochelatase, mitochondrial	6	40	27.4272	27.3517	27.4968	26.8673	27.3686	27.3762	-0.221207	0.566394
641	FEN1	P39748	Flap endonuclease 1	14	133	29.8799	29.8178	29.8641	29.5378	29.6633	29.5442	-0.272168	2.42884
642	FERMT2	Q96AC1	Fermitin family homolog 2	4	8	24.8491	24.8585	24.7109	24.2146	25.5868	25.4245	0.269141	0.244099
643	FGFR1OP	O95684	FGFR1 oncogene partner	5	20	23.8331	23.652	24.9243	27.1445	27.0934	27.1713	2.99993	2.77995
644	FHL1	Q13642	Four and a half LIM domains protein 1	8	58	28.5161	28.6972	28.5773	28.3214	28.4703	28.5661	-0.144218	0.744825
645	FHOD1	Q9Y613	FH1/FH2 domain-containing protein 1	7	11	22.2753	24.3523	23.2806	26.8567	26.6359	27.0533	3.54591	2.35623
646	FIP1L1	Q6UN15	Pre-mRNA 3-end-processing factor FIP1	12	68	27.7205	27.5251	27.3712	29.034	28.7358	29.087	1.41334	3.16298
647	FKBP15	Q5T1M5	FK506-binding protein 15	5	17	24.0666	24.2682	25.3675	26.6581	26.8721	27.2173	2.34839	2.24132
648	FKBP3	Q00688	Peptidyl-prolyl cis-trans isomerase FKBP3	12	59	22.9894	22.9639	23.7721	29.1587	29.1808	29.0511	5.88839	4.59353
649	FKBP4	Q02790	Peptidyl-prolyl cis-trans isomerase FKBP4;Peptidyl-prolyl cis-trans isomerase FKBP4, N-terminally processed	20	158	30.2769	30.4437	30.6818	30.0441	30.1293	30.0495	-0.393155	1.50672
650	FKBP5	Q13451	Peptidyl-prolyl cis-trans isomerase FKBP5;Peptidyl-prolyl cis-trans isomerase FKBP5, N-terminally processed	10	73	27.8431	27.9397	28.2855	28.5157	28.3998	28.3834	0.410219	1.36314
651	FKBP8	Q14318	Peptidyl-prolyl cis-trans isomerase FKBP8	9	41	27.3705	27.3517	27.6688	27.3944	27.2836	26.9642	-0.249593	0.689106
652	FLII	Q13045	Protein flightless-1 homolog	9	60	26.694	27.0198	26.7465	27.2289	27.1538	27.1891	0.370469	1.63794
653	FLNA	P21333	Filamin-A	219	3635	31.3862	31.3964	31.8312	37.2983	37.2927	37.3371	5.77144	5.59602
654	FLNB	O75369	Filamin-B	35	102	28.0667	27.7938	28.3028	28.6676	28.3027	28.4227	0.409896	1.05792
655	FLOT1	O75955	Flotillin-1	7	27	24.8379	26.0615	25.7049	25.8952	26.0392	25.9291	0.419743	0.501299
656	FMR1	Q06787	Fragile X mental retardation protein 1	9	39	24.4692	24.4281	23.8599	27.7523	27.6965	27.7271	3.47289	4.21368
657	FNBP4	Q8N3X1	Formin-binding protein 4	5	14	22.868	23.6783	24.308	26.9268	26.7826	26.9567	3.2706	2.83281
658	FOXK2	Q01167	Forkhead box protein K2	5	23	25.4718	26.0245	24.1731	27.5914	27.1758	27.2892	2.129	1.71306
659	FRG1	Q14331	Protein FRG1	4	6	25.4862	25.4272	25.3629	25.9261	25.8376	26.3088	0.598754	1.79975
660	FSCN1	Q16658	Fascin	24	182	30.0272	30.2752	30.2821	29.3437	29.5708	29.4628	-0.735761	2.6388
661	FSIP2	Q5CZC0	Fibrous sheath-interacting protein 2	4	6	22.6182	24.4388	23.0109	27.4654	27.3734	27.243	4.00463	2.70295
662	FTSJ3	Q8IY81	pre-rRNA processing protein FTSJ3	19	60	29.1172	27.2701	27.2172	27.3449	27.4763	27.6929	-0.363474	0.224387
663	FUBP1	Q96AE4	Far upstream element-binding protein 1	15	53	27.0782	27.1609	27.5699	27.9326	27.7826	27.6818	0.52932	1.45773
664	FUBP3	Q96I24	Far upstream element-binding protein 3	27	235	29.6617	29.8837	30.1745	29.946	29.9302	29.8854	0.0139065	0.031332
665	FUS	P35637	RNA-binding protein FUS	14	76	32.5817	29.0554	28.0528	25.0941	27.4149	28.1096	-3.02378	0.852253
666	FXR1	P51114	Fragile X mental retardation syndrome-related protein 1	16	72	28.5119	28.0654	28.4471	29.1362	29.231	29.1187	0.820485	2.33335
667	FXR2	P51116	Fragile X mental retardation syndrome-related protein 2	10	25	26.1364	25.8834	25.751	28.0521	27.6624	27.0132	1.6523	2.15862
668	G3BP1	Q13283	Ras GTPase-activating protein-binding protein 1	31	608	30.6027	30.8262	30.9398	32.9805	33.0698	33.0138	2.23181	4.5814
669	G3BP2	Q9UN86	Ras GTPase-activating protein-binding protein 2	18	109	27.1154	26.7984	27.0654	30.4297	29.7161	30.4145	3.19373	3.63033
670	G6PD	P11413	Glucose-6-phosphate 1-dehydrogenase	9	50	27.2662	27.4646	27.6306	27.639	27.3687	27.4191	0.0217991	0.0561474
671	GADD45GIP1	Q8TAE8	Growth arrest and DNA damage-inducible proteins-interacting protein 1	2	13	23.4626	24.8591	23.7099	25.4777	25.5828	25.5959	1.54159	1.63107
672	GALK1	P51570	Galactokinase	18	133	28.958	29.176	29.3389	28.6628	28.8105	28.9202	-0.359795	1.26746
673	GALNT2	Q10471	Polypeptide N-acetylgalactosaminyltransferase 2;Polypeptide N-acetylgalactosaminyltransferase 2 soluble form	2	8	26.3157	25.9847	26.1516	23.7182	24.5705	24.3724	-1.93029	2.66559
674	GAN	Q9H2C0	Gigaxonin	3	15	25.4043	25.5566	25.52	25.4839	25.379	25.3303	-0.095953	0.675663
675	GANAB	Q14697	Neutral alpha-glucosidase AB	16	159	29.4167	29.7356	29.8457	29.1946	29.29	29.1684	-0.448292	1.54391
676	GAPDH	P04406	Glyceraldehyde-3-phosphate dehydrogenase	12	161	29.8633	29.8952	30.3556	29.2135	29.1681	29.1878	-0.848263	2.21996
677	GAPVD1	Q14C86	GTPase-activating protein and VPS9 domain-containing protein 1	21	101	27.6086	28.2992	28.1111	29.8222	29.6437	29.6746	1.7072	2.87839
678	GARS	P41250	Glycine--tRNA ligase	21	168	29.7787	30.1431	30.0448	29.5511	29.5817	29.2363	-0.532519	1.57828
679	GART	P22102	Trifunctional purine biosynthetic protein adenosine-3;Phosphoribosylamine--glycine ligase;Phosphoribosylformylglycinamidine cyclo-ligase;Phosphoribosylglycinamide formyltransferase	54	680	31.9857	32.2608	32.1538	31.6175	31.7731	31.6104	-0.466415	2.08059
680	GATA4	P43694	Transcription factor GATA-4	2	8	24.4658	24.3129	24.377	23.9775	24.9296	24.5457	0.0990149	0.129869
681	GATAD2A	Q86YP4	Transcriptional repressor p66-alpha	23	132	28.2928	28.5929	28.3543	29.9788	29.8893	29.847	1.49169	3.93912
682	GATAD2B	Q8WXI9	Transcriptional repressor p66-beta	20	136	27.5362	27.6551	27.8994	29.9194	29.7972	29.9474	2.19114	4.32838
683	GBF1	Q92538	Golgi-specific brefeldin A-resistance guanine nucleotide exchange factor 1	2	11	23.4906	23.5021	23.4674	25.245	25.3633	25.1936	1.7806	5.38647
684	GBX2	P52951	Homeobox protein GBX-2	1	8	23.0568	23.1433	23.289	27.4167	26.4873	26.5978	3.67087	3.58672
685	GCLM	P48507	Glutamate--cysteine ligase regulatory subunit	4	32	26.8819	27.0336	27.2425	26.0542	25.8106	26.0614	-1.07724	2.89724
686	GCN1L1	Q92616	Translational activator GCN1	64	392	29.9977	30.3782	30.3104	31.5458	31.7993	31.5653	1.40801	3.2275
687	GDI2	P50395	Rab GDP dissociation inhibitor beta	6	28	26.7348	26.6925	27.1395	27.001	27.031	26.5454	0.00353813	0.00546775
688	GEMIN5	Q8TEQ6	Gem-associated protein 5	17	109	26.8417	27.6975	27.1569	29.1127	29.7925	29.6248	2.27795	2.67188
689	GFM1	Q96RP9	Elongation factor G, mitochondrial	9	58	27.5617	28.2358	27.6175	27.3319	27.6474	27.5876	-0.2827	0.525421
690	GFPT1	Q06210	Glutamine--fructose-6-phosphate aminotransferase [isomerizing] 1	15	79	28.5627	28.8676	28.6306	28.0618	28.2305	28.2069	-0.520585	2.09238
691	GIGYF2	Q6Y7W6	PERQ amino acid-rich with GYF domain-containing protein 2	50	519	23.7033	24.2537	24.4784	33.4693	33.3217	33.3755	9.2437	5.60852
692	GIT1	Q9Y2X7	ARF GTPase-activating protein GIT1	5	22	26.287	25.6078	25.8474	26.4183	26.4495	26.6051	0.576915	1.3052
693	GKAP1	Q5VSY0	G kinase-anchoring protein 1	10	74	23.4784	25.2624	24.1984	29.152	29.4636	29.3053	4.9939	3.16338
694	GLA	P06280	Alpha-galactosidase A	5	19	26.7065	26.796	26.9622	25.712	23.461	25.7302	-1.85386	1.15148
695	GLDC	P23378	Glycine dehydrogenase (decarboxylating), mitochondrial	6	38	26.1567	26.437	26.7516	25.9047	25.8905	25.4375	-0.704223	1.42289
696	GLRX3	O76003	Glutaredoxin-3	9	41	27.74	28.0252	27.7523	27.9981	28.0899	27.7644	0.111615	0.344094
697	GLS	O94925	Glutaminase kidney isoform, mitochondrial	8	26	27.1647	27.1924	27.2768	25.9283	26.3056	25.9401	-1.15332	3.07113
698	GLTSCR2	Q9NZM5	Glioma tumor suppressor candidate region gene 2 protein	6	30	26.2965	23.6747	27.0574	27.3082	27.248	27.5989	1.70879	0.763104
699	GLUD1;GLUD2	P00367;P49448	Glutamate dehydrogenase 1, mitochondrial;Glutamate dehydrogenase 2, mitochondrial	6	16	25.8646	26.3767	26.8617	23.5087	25.3187	23.7675	-2.16935	1.57231
700	GLUL	P15104	Glutamine synthetase	2	9	24.8745	24.5954	25.0634	25.6102	24.1017	25.5108	0.229802	0.171915
701	GLYR1	Q49A26	Putative oxidoreductase GLYR1	3	18	24.8814	24.6416	24.4483	24.8412	24.6961	25.0112	0.192385	0.549763
702	GMDS	O60547	GDP-mannose 4,6 dehydratase	4	17	24.2472	25.9853	25.7209	25.8239	25.8646	25.7965	0.510535	0.399225
703	GMFB	P60983	Glia maturation factor beta	6	10	24.0995	27.128	23.6883	26.4164	26.6561	26.3956	1.51743	0.628038
704	GMPPA	Q96IJ6	Mannose-1-phosphate guanyltransferase alpha	7	32	26.2374	26.7313	26.2761	26.2672	25.8673	25.7976	-0.437534	0.948901
705	GMPPB	Q9Y5P6	Mannose-1-phosphate guanyltransferase beta	3	18	25.7706	26.4987	26.1138	25.6108	25.7944	25.8526	-0.37515	0.776879
706	GMPS	P49915	GMP synthase [glutamine-hydrolyzing]	37	365	30.8287	31.3224	31.1716	30.7934	30.8639	30.7689	-0.298862	0.939207
707	GNAS	P63092;Q5JWF2	Guanine nucleotide-binding protein G(s) subunit alpha isoforms short;Guanine nucleotide-binding protein G(s) subunit alpha isoforms XLas	6	54	27.8519	27.8961	27.9897	27.6366	27.7106	27.6302	-0.253459	2.20562
708	GNB1	P62873	Guanine nucleotide-binding protein G(I)/G(S)/G(T) subunit beta-1	7	37	29.0987	29.7765	29.717	28.257	28.4511	28.162	-1.2407	2.2243
709	GNB2	P62879	Guanine nucleotide-binding protein G(I)/G(S)/G(T) subunit beta-2	7	25	28.5994	28.6478	28.4668	27.7688	28.1574	28.1771	-0.536922	1.69663
710	GNB2L1	P63244	Guanine nucleotide-binding protein subunit beta-2-like 1;Guanine nucleotide-binding protein subunit beta-2-like 1, N-terminally processed	8	29	27.1082	27.5301	27.7555	26.6281	26.7888	26.7225	-0.751458	1.73624
711	GNL2	Q13823	Nucleolar GTP-binding protein 2	17	77	27.6796	25.2035	25.371	28.8365	28.6412	29.0423	2.75526	1.56942
712	GNL3	Q9BVP2	Guanine nucleotide-binding protein-like 3	14	71	29.2532	27.8539	28.1572	27.6598	28.0183	27.886	-0.566702	0.576601
713	GNL3L	Q9NVN8	Guanine nucleotide-binding protein-like 3-like protein	4	22	25.5895	25.6019	25.2731	24.3034	24.8336	24.1218	-1.06856	1.95526
714	GOLGA3	Q08378	Golgin subfamily A member 3	4	4	23.9409	24.6137	24.6337	24.2131	23.9593	23.9485	-0.355815	0.661943
715	GOLGA5	Q8TBA6	Golgin subfamily A member 5	8	25	23.8166	27.5965	23.5517	27.3994	27.4057	27.3675	2.40264	0.854671
716	GOLGB1	Q14789	Golgin subfamily B member 1	4	11	23.2302	23.3468	24.0446	25.1139	25.03	24.7835	1.43526	2.20343
717	GPALPP1	Q8IXQ4	GPALPP motifs-containing protein 1	5	6	23.8962	24.1328	24.2871	25.8599	25.4688	25.8905	1.63436	3.11586
718	GPATCH1	Q9BRR8	G patch domain-containing protein 1	24	123	24.0383	25.1328	24.5378	29.6636	30.0201	29.9822	5.31901	4.03162
719	GPATCH4	Q5T3I0	G patch domain-containing protein 4	4	36	26.8252	25.5029	25.7706	26.2239	25.8367	26.0743	0.0121002	0.00950687
720	GPATCH8	Q9UKJ3	G patch domain-containing protein 8	6	19	23.1288	24.616	23.4376	26.8046	26.5186	26.6603	2.93373	2.5065
721	GPHN	Q9NQX3	Gephyrin;Molybdopterin adenylyltransferase;Molybdopterin molybdenumtransferase	12	52	25.7088	25.1802	25.3736	28.3272	28.2826	28.346	2.89773	4.31079
722	GPI	P06744	Glucose-6-phosphate isomerase	4	13	26.947	26.7714	27.455	24.3585	24.1371	24.8851	-2.59758	2.99802
723	GPKOW	Q92917	G patch domain and KOW motifs-containing protein	12	107	28.2268	28.6831	28.475	28.8027	28.9638	28.8236	0.401716	1.33094
724	GPN1	Q9HCN4	GPN-loop GTPase 1	3	7	23.6292	23.2483	22.8976	26.1557	25.9067	26.0688	2.78535	3.6226
725	GPRIN1	Q7Z2K8	G protein-regulated inducer of neurite outgrowth 1	5	30	24.0451	24.1124	24.7922	26.8028	26.631	26.8002	2.42813	3.23335
726	GPT2	Q8TD30	Alanine aminotransferase 2	8	23	26.5878	26.9308	26.9172	26.418	26.8993	26.7157	-0.134235	0.304308
727	GRHPR	Q9UBQ7	Glyoxylate reductase/hydroxypyruvate reductase	6	48	27.3789	27.7584	27.5102	26.8394	26.7717	26.6238	-0.804222	2.48197
728	GRSF1	Q12849	G-rich sequence factor 1	13	99	28.6698	28.6203	28.7661	28.3985	28.5499	28.4951	-0.204245	1.53094
729	GRWD1	Q9BQ67	Glutamate-rich WD repeat-containing protein 1	11	108	28.954	28.9592	29.1433	28.8628	28.988	28.8837	-0.107328	0.663672
730	GSE1	Q14687	Genetic suppressor element 1	6	16	25.7514	23.6306	25.888	26.3941	27.1316	26.6831	1.64629	1.01448
731	GSK3A	P49840	Glycogen synthase kinase-3 alpha	11	63	27.076	27.5149	27.413	27.5175	27.3654	27.0892	-0.0105921	0.0193173
732	GSPT1	P15170	Eukaryotic peptide chain release factor GTP-binding subunit ERF3A	17	168	29.2138	29.6956	29.7503	29.5018	29.6965	29.6251	0.0546068	0.109942
733	GSTO1	P78417	Glutathione S-transferase omega-1	9	56	28.767	29.1739	28.5121	26.4588	27.4305	26.6726	-1.9637	2.29481
734	GTF2A1	P52655	Transcription initiation factor IIA subunit 1;Transcription initiation factor IIA alpha chain;Transcription initiation factor IIA beta chain	6	25	23.9387	24.0263	23.6088	28.037	27.9942	27.9197	4.1257	5.20917
735	GTF2E1	P29083	General transcription factor IIE subunit 1	6	34	22.1662	23.5468	24.9571	26.974	26.9563	27.2845	3.51486	1.90663
736	GTF2E2	P29084	Transcription initiation factor IIE subunit beta	8	35	24.5403	23.7109	24.1602	27.6302	27.7874	27.7457	3.58397	3.90108
737	GTF2F1	P35269	General transcription factor IIF subunit 1	23	197	23.9579	23.7224	23.05	30.8399	30.7025	30.816	7.20933	4.89829
738	GTF2F2	P13984	General transcription factor IIF subunit 2	10	98	24.1845	25.728	25.7674	31.2723	28.7669	28.9079	4.42241	1.99233
739	GTF2I	P78347	General transcription factor II-I	35	197	28.8941	29.2881	29.3601	29.4109	29.46	29.3352	0.221292	0.672735
740	GTF3C1	Q12789	General transcription factor 3C polypeptide 1	9	32	24.2248	27.1771	27.257	27.1905	27.1739	27.02	0.908452	0.382308
741	GTF3C3	Q9Y5Q9	General transcription factor 3C polypeptide 3	4	18	25.5868	25.4797	24.0956	26.2857	26.8912	26.3459	1.45358	1.31564
742	GTF3C4	Q9UKN8	General transcription factor 3C polypeptide 4	6	29	26.6516	26.5948	26.9001	26.6542	27.1078	26.602	0.072504	0.14478
743	GTF3C5	Q9Y5Q8	General transcription factor 3C polypeptide 5	7	66	27.3945	27.5587	27.7038	28.3438	28.4479	28.4074	0.847349	3.07015
744	GTPBP1	O00178	GTP-binding protein 1	7	26	23.8409	26.5717	26.2248	26.4662	26.2622	26.2593	0.78343	0.382625
745	GTPBP4	Q9BZE4	Nucleolar GTP-binding protein 1	15	42	29.8569	27.113	27.9059	26.8082	26.7974	26.7991	-1.49037	0.849069
746	GTSE1	Q9NYZ3	G2 and S phase-expressed protein 1	6	16	23.1871	24.373	23.6567	27.3948	27.1416	27.4317	3.58378	3.25831
747	GYS1	P13807	Glycogen [starch] synthase, muscle	8	32	26.8905	27.2238	27.1327	25.1563	26.3204	26.8637	-0.968873	0.878896
748	H1FX	Q92522	Histone H1x	9	86	28.6351	28.5214	28.1047	28.7714	28.589	28.7722	0.290492	0.776883
749	H2AFV;H2AFZ	Q71UI9;P0C0S5	Histone H2A.V;Histone H2A.Z	9	77	32.6019	30.1829	28.7338	28.2969	28.1704	28.1681	-2.29443	0.951015
750	H2AFY	O75367	Core histone macro-H2A.1	17	78	31.5684	28.2718	27.4696	27.7096	27.8091	27.556	-1.41168	0.489433
751	H2BFS;HIST1H2BK	P57053;O60814	Histone H2B type F-S;Histone H2B type 1-K	18	314	35.7401	32.56	31.1845	32.025	32.0066	32.054	-1.13301	0.348455
752	HACD3	Q9P035	Very-long-chain (3R)-3-hydroxyacyl-CoA dehydratase 3	5	23	26.7809	26.9833	26.8881	26.2621	26.1428	26.6185	-0.542988	1.61056
753	HADH	Q16836	Hydroxyacyl-coenzyme A dehydrogenase, mitochondrial	11	43	27.7666	28.2133	27.9985	27.4047	27.7069	27.3525	-0.504783	1.3868
754	HADHA	P40939	Trifunctional enzyme subunit alpha, mitochondrial;Long-chain enoyl-CoA hydratase;Long chain 3-hydroxyacyl-CoA dehydrogenase	20	151	29.1986	29.4401	29.4039	28.7583	28.8826	28.7756	-0.541999	2.51491
755	HADHB	P55084	Trifunctional enzyme subunit beta, mitochondrial;3-ketoacyl-CoA thiolase	19	110	29.3116	29.4651	29.5587	28.4655	28.5871	28.6341	-0.882899	3.25937
756	HAT1	O14929	Histone acetyltransferase type B catalytic subunit	4	25	25.5007	25.432	25.7741	26.6587	27.1467	26.8137	1.30409	2.73464
757	HAUS1	Q96CS2	HAUS augmin-like complex subunit 1	10	48	23.8977	26.035	24.0378	28.3182	28.3506	28.1165	3.60491	2.18401
758	HAUS3	Q68CZ6	HAUS augmin-like complex subunit 3	4	19	23.6645	24.2765	23.5718	26.5487	26.6396	26.9363	2.87063	3.48282
759	HAUS4	Q9H6D7	HAUS augmin-like complex subunit 4	5	11	24.4028	23.47	22.7075	27.1411	27.0554	26.9284	3.51487	2.68541
760	HAUS5	O94927	HAUS augmin-like complex subunit 5	14	59	24.8263	25.3243	24.9529	28.4629	28.563	28.7815	3.56799	4.45089
761	HAUS6	Q7Z4H7	HAUS augmin-like complex subunit 6	17	94	26.2836	26.5832	26.4855	29.3691	29.4496	29.6871	3.05116	4.70957
762	HAUS8	Q9BT25	HAUS augmin-like complex subunit 8	10	41	24.8908	25.0603	25.0163	28.449	28.2787	28.4272	3.39585	5.87533
763	HAX1	O00165	HCLS1-associated protein X-1	6	23	26.4211	26.1414	26.5609	26.1737	26.1182	26.0222	-0.269767	0.964355
764	HBS1L	Q9Y450	HBS1-like protein	10	66	27.6083	27.5692	27.9907	29.3195	28.9279	29.0787	1.38596	2.84932
765	HCFC1	P51610	Host cell factor 1;HCF N-terminal chain 1;HCF N-terminal chain 2;HCF N-terminal chain 3;HCF N-terminal chain 4;HCF N-terminal chain 5;HCF N-terminal chain 6;HCF C-terminal chain 1;HCF C-terminal chain 2;HCF C-terminal chain 3;HCF C-terminal chain 4;HCF C-terminal chain 5;HCF C-terminal chain 6	28	226	27.5597	27.8842	28.242	31.0274	30.9501	31.1304	3.14069	3.9847
766	HDAC1	Q13547	Histone deacetylase 1	8	55	28.378	28.4503	28.3459	28.8885	28.9825	28.837	0.511274	3.20163
767	HDAC2	Q92769	Histone deacetylase 2	7	14	25.5912	24.7288	22.4305	25.7657	26.073	25.9622	1.68348	0.82313
768	HDDC2	Q7Z4H3	HD domain-containing protein 2	6	39	27.8134	28.1766	27.9663	27.3094	27.43	27.489	-0.575968	2.09102
769	HDGFRP2	Q7Z4V5	Hepatoma-derived growth factor-related protein 2	13	82	26.5082	22.3289	23.7267	29.4741	29.4548	29.6197	5.3283	1.90971
770	HDLBP	Q00341	Vigilin	72	537	27.7857	27.6388	28.1608	32.2785	32.2864	32.272	4.41718	5.03932
771	HEATR1	Q9H583	HEAT repeat-containing protein 1;HEAT repeat-containing protein 1, N-terminally processed	4	11	26.8182	24.9379	24.9579	24.6201	24.8189	24.8394	-0.811858	0.576244
772	HEATR3	Q7Z4Q2	HEAT repeat-containing protein 3	2	13	23.5399	24.8127	22.9844	26.1383	26.0456	26.2062	2.35106	1.90786
773	HEBP1	Q9NRV9	Heme-binding protein 1	2	4	22.7479	23.5825	24.3107	24.3988	24.527	24.3008	0.861865	0.87982
774	HECTD1	Q9ULT8	E3 ubiquitin-protein ligase HECTD1	12	40	26.4702	26.6857	26.5441	27.2196	27.1994	27.1345	0.617797	3.08433
775	HECTD3	Q5T447	E3 ubiquitin-protein ligase HECTD3	3	18	25.6749	25.3684	25.2065	24.1555	24.4133	24.7426	-0.979459	1.95999
776	HELLS	Q9NRZ9	Lymphoid-specific helicase	17	97	28.0523	28.1778	28.2677	28.0299	28.1903	28.0924	-0.0617332	0.325289
777	HGH1	Q9BTY7	Protein HGH1 homolog	6	26	26.1145	26.4438	26.3626	26.1955	26.0422	26.3969	-0.0954304	0.267415
778	HGS	O14964	Hepatocyte growth factor-regulated tyrosine kinase substrate	8	32	26.6449	26.8276	27.1938	28.4819	28.2021	28.365	1.46091	2.89619
779	HIBCH	Q6NVY1	3-hydroxyisobutyryl-CoA hydrolase, mitochondrial	5	40	27.5675	27.4686	27.4166	27.1816	27.2783	27.4674	-0.175149	0.858084
780	HIF1AN	Q9NWT6	Hypoxia-inducible factor 1-alpha inhibitor	3	21	24.0766	23.6958	23.5484	26.4677	26.4979	26.4809	2.70856	4.17227
781	HIGD1A	Q9Y241	HIG1 domain family member 1A, mitochondrial	3	31	24.1192	23.2024	22.933	27.6429	27.2675	27.6339	4.09658	3.37817
782	HINT1	P49773	Histidine triad nucleotide-binding protein 1	7	90	28.2156	28.412	28.5953	28.5489	28.5439	28.5165	0.12882	0.512893
783	HIP1R	O75146	Huntingtin-interacting protein 1-related protein	3	27	24.8376	22.8614	24.6988	24.9058	24.7338	24.7385	0.660088	0.443426
784	HIST1H1C	P16403	Histone H1.2	16	53	32.594	30.6189	29.6618	30.0373	29.9421	29.9321	-0.987697	0.499336
785	HIST1H1D	P16402	Histone H1.3	17	20	27.409	24.3183	24.1087	26.4048	25.6708	26.0983	0.779312	0.28956
786	HIST1H1E	P10412	Histone H1.4	17	282	34.3266	32.4217	31.9593	33.0509	32.6931	32.9049	-0.0195592	0.00879204
787	HIST1H2AC;HIST3H2A;HIST1H2AB	Q93077;Q7L7L0;P04908	Histone H2A type 1-C;Histone H2A type 3;Histone H2A type 1-B/E	14	54	32.1886	28.5834	27.7999	27.1772	27.6303	27.5912	-2.05776	0.68913
788	HIST1H2AJ;HIST1H2AH;H2AFJ;HIST1H2AG;HIST1H2AD	Q99878;Q96KK5;Q9BTM1;P0C0S8;P20671	Histone H2A type 1-J;Histone H2A type 1-H;Histone H2A.J;Histone H2A type 1;Histone H2A type 1-D	16	333	36.7245	33.5147	32.5219	32.2056	32.4908	32.3494	-1.90509	0.681436
789	HIST1H2BJ	P06899	Histone H2B type 1-J	17	20	32.6751	28.8081	26.3765	25.6295	26.1251	25.9401	-3.38833	0.856049
790	HIST1H2BM;HIST1H2BN;HIST1H2BH;HIST2H2BF;HIST1H2BC;HIST1H2BD	Q99879;Q99877;Q93079;Q5QNW6;P62807;P58876	Histone H2B type 1-M;Histone H2B type 1-N;Histone H2B type 1-H;Histone H2B type 2-F;Histone H2B type 1-C/E/F/G/I;Histone H2B type 1-D	18	9	28.9552	24.6247	23.7644	25.1879	24.7812	25.2309	-0.714754	0.167166
791	HIST1H4A	P62805	Histone H4	14	176	31.5387	30.1814	29.999	29.3746	29.7609	29.6893	-0.964743	0.900036
792	HIST2H2AB	Q8IUE6	Histone H2A type 2-B	13	26	31.8289	26.3638	25.342	26.1541	25.4578	26.7618	-1.72035	0.34842
793	HIST2H2AC;HIST2H2AA3	Q16777;Q6FI13	Histone H2A type 2-C;Histone H2A type 2-A	15	72	35.315	32.4044	31.1163	30.4586	30.5406	30.6998	-2.37895	0.891546
794	HIST2H3A;HIST3H3;HIST1H3A	Q71DI3;Q16695;P68431	Histone H3.2;Histone H3.1t;Histone H3.1	7	54	33.5986	31.9479	31.1333	30.8614	30.6589	30.7551	-1.46812	0.943986
795	HIVEP1	P15822	Zinc finger protein 40	2	3	23.8552	24.0034	24.1529	27.8557	27.6191	27.9193	3.79421	5.14816
796	HK1	P19367	Hexokinase-1	20	111	28.589	28.9002	28.8265	27.7956	28.1383	27.9073	-0.82483	2.40691
797	HK2	P52789	Hexokinase-2	9	26	27.1157	27.3128	27.102	26.3271	26.4753	26.3035	-0.808229	3.13164
798	HLCS	P50747	Biotin--protein ligase;Biotin--[methylmalonyl-CoA-carboxytransferase] ligase;Biotin--[propionyl-CoA-carboxylase [ATP-hydrolyzing]] ligase;Biotin--[methylcrotonoyl-CoA-carboxylase] ligase;Biotin--[acetyl-CoA-carboxylase] ligase	15	72	28.5112	28.9854	28.9071	27.5185	27.6795	27.6017	-1.20136	2.83699
799	HMG20A	Q9NP66	High mobility group protein 20A	2	14	24.6033	23.583	24.6116	26.1384	25.8933	25.7281	1.65394	1.98983
800	HMGA1	P17096	High mobility group protein HMG-I/HMG-Y	4	27	30.3767	26.182	23.5161	25.9741	25.9891	26.2799	-0.610582	0.110533
801	HMGB1;HMGB1P1	P09429;B2RPK0	High mobility group protein B1;Putative high mobility group protein B1-like 1	4	19	23.3145	23.5306	23.363	28.4887	28.4896	28.5324	5.10085	6.74792
802	HMGCS1	Q01581	Hydroxymethylglutaryl-CoA synthase, cytoplasmic	8	79	28.1805	28.4959	28.8121	27.6965	27.8687	27.7223	-0.73371	1.74152
803	HMGXB4	Q9UGU5	HMG domain-containing protein 4	4	26	23.215	24.0855	24.082	26.5297	26.1205	26.2929	2.5202	2.88912
804	HMMR	O75330	Hyaluronan mediated motility receptor	9	43	24.4034	24.7054	23.8977	27.1144	27.0526	27.0633	2.74126	3.50051
805	HN1	Q9UK76	Hematological and neurological expressed 1 protein;Hematological and neurological expressed 1 protein, N-terminally processed	5	52	23.1245	24.1574	25.4797	29.3232	29.2027	29.3358	5.03336	2.74337
806	HN1L	Q9H910	Hematological and neurological expressed 1-like protein	16	113	25.0623	23.5581	23.7257	30.9218	30.6013	30.8579	6.67827	3.78944
807	HNRNPA0	Q13151	Heterogeneous nuclear ribonucleoprotein A0	18	256	31.0003	30.4054	30.8802	30.8754	30.7715	30.7194	0.0267957	0.0490637
808	HNRNPA1;HNRNPA1L2	P09651;Q32P51	Heterogeneous nuclear ribonucleoprotein A1;Heterogeneous nuclear ribonucleoprotein A1, N-terminally processed;Heterogeneous nuclear ribonucleoprotein A1-like 2	27	532	33.8311	32.3289	32.5642	32.7977	32.8953	32.9578	-0.0244916	0.0173491
809	HNRNPA2B1	P22626	Heterogeneous nuclear ribonucleoproteins A2/B1	36	526	34.1569	32.2044	32.2644	32.2899	31.9415	32.211	-0.727765	0.487635
810	HNRNPA3	P51991	Heterogeneous nuclear ribonucleoprotein A3	21	152	31.9088	30.3006	30.7452	29.7974	30.1599	29.9708	-1.00886	0.96265
811	HNRNPAB	Q99729	Heterogeneous nuclear ribonucleoprotein A/B	16	140	30.7315	29.9913	29.9195	30.1418	30.4096	30.3277	0.0789235	0.104788
812	HNRNPC	P07910	Heterogeneous nuclear ribonucleoproteins C1/C2	20	239	32.4326	31.6453	31.713	30.9498	31.0592	30.9536	-0.942736	1.68306
813	HNRNPD	Q14103	Heterogeneous nuclear ribonucleoprotein D0	26	356	32.1209	31.9992	31.9686	31.3919	31.8224	31.6307	-0.414604	1.44912
814	HNRNPDL	O14979	Heterogeneous nuclear ribonucleoprotein D-like	17	175	30.6056	30.2813	30.4297	29.7924	29.9607	29.9514	-0.537361	2.11103
815	HNRNPF	P52597	Heterogeneous nuclear ribonucleoprotein F;Heterogeneous nuclear ribonucleoprotein F, N-terminally processed	25	235	31.5652	31.4588	31.602	30.4782	30.8427	30.7306	-0.858141	2.74903
816	HNRNPH1	P31943	Heterogeneous nuclear ribonucleoprotein H;Heterogeneous nuclear ribonucleoprotein H, N-terminally processed	35	490	32.9764	32.7777	32.8808	31.5363	31.9267	31.818	-1.11797	3.00189
817	HNRNPH2	P55795	Heterogeneous nuclear ribonucleoprotein H2	15	43	27.9785	27.6237	27.5514	24.8335	25.6063	25.8523	-2.28719	2.62298
818	HNRNPH3	P31942	Heterogeneous nuclear ribonucleoprotein H3	13	67	30.0975	28.8189	28.417	27.2601	27.1033	26.579	-2.13034	1.75425
819	HNRNPK	P61978	Heterogeneous nuclear ribonucleoprotein K	39	704	33.5404	33.3934	33.4413	32.8684	33.0745	32.9527	-0.493206	2.58276
820	HNRNPL	P14866	Heterogeneous nuclear ribonucleoprotein L	37	635	33.1772	33.2688	33.1488	32.6601	32.8285	32.7369	-0.456406	2.77663
821	HNRNPM	P52272	Heterogeneous nuclear ribonucleoprotein M	49	831	33.5894	32.5159	32.7093	31.9442	31.7411	31.9741	-1.05177	1.44449
822	HNRNPR	O43390	Heterogeneous nuclear ribonucleoprotein R	27	268	30.8095	30.2873	30.2929	30.4389	30.6139	30.4954	0.0528666	0.105466
823	HNRNPU	Q00839	Heterogeneous nuclear ribonucleoprotein U	48	553	33.941	32.573	32.5101	32.5807	32.6908	32.7126	-0.346658	0.30059
824	HNRNPUL1	Q9BUJ2	Heterogeneous nuclear ribonucleoprotein U-like protein 1	14	80	29.3156	28.1623	28.4235	28.2795	28.4698	28.7458	-0.135407	0.133161
825	HNRNPUL2	Q1KMD3	Heterogeneous nuclear ribonucleoprotein U-like protein 2	11	26	28.9915	26.2009	26.3531	25.7717	25.6189	25.6553	-1.49986	0.760518
826	HP1BP3	Q5SSJ5	Heterochromatin protein 1-binding protein 3	10	48	27.4267	27.6917	27.4061	28.1592	28.049	28.1096	0.597771	2.44809
827	HPRT1	P00492	Hypoxanthine-guanine phosphoribosyltransferase	10	79	27.9593	28.1616	28.2939	27.7891	28.112	27.802	-0.237277	0.760221
828	HSD17B10	Q99714	3-hydroxyacyl-CoA dehydrogenase type-2	2	9	24.2927	24.0881	24.1513	25.2234	23.7576	23.8829	0.1106	0.0827082
829	HSD17B12	Q53GQ0	Very-long-chain 3-oxoacyl-CoA reductase	3	9	25.8111	26.0689	24.7145	23.9739	24.1751	24.082	-1.4545	1.59171
830	HSD17B4	P51659	Peroxisomal multifunctional enzyme type 2;(3R)-hydroxyacyl-CoA dehydrogenase;Enoyl-CoA hydratase 2	23	159	29.592	29.8274	29.8517	28.9257	29.0277	28.8937	-0.808023	3.03071
831	HSDL2	Q6YN16	Hydroxysteroid dehydrogenase-like protein 2	5	30	26.6188	27.089	27.0113	26.649	26.7752	26.6691	-0.208595	0.62245
832	HSP90AA1	P07900	Heat shock protein HSP 90-alpha	53	439	31.6513	31.8205	31.9287	31.2946	31.5496	31.1413	-0.47165	1.51513
833	HSP90AB1	P08238	Heat shock protein HSP 90-beta	65	1063	33.8284	34.1645	34.1816	33.4452	33.6495	33.3701	-0.569932	1.79619
834	HSP90AB2P	Q58FF8	Putative heat shock protein HSP 90-beta 2	10	57	28.6998	28.8838	29.0742	27.6396	28.1359	27.2756	-1.2022	1.94017
835	HSP90B1	P14625	Endoplasmin	36	264	30.7498	30.821	31.1099	30.6855	30.8144	30.6834	-0.165803	0.631205
836	HSPA12A	O43301	Heat shock 70 kDa protein 12A	2	12	24.0657	24.8861	24.6073	25.2745	25.2238	25.5222	0.820451	1.47508
837	HSPA14	Q0VDF9	Heat shock 70 kDa protein 14	6	44	26.6296	26.9955	26.967	25.9332	25.9248	25.3856	-1.1162	2.17699
838	HSPA1B;HSPA1A	P0DMV9;P0DMV8	Heat shock 70 kDa protein 1B;Heat shock 70 kDa protein 1A	53	1056	33.2115	33.2346	33.5733	33.605	33.9292	33.7278	0.414177	1.29149
839	HSPA4	P34932	Heat shock 70 kDa protein 4	13	15	26.2177	26.8398	27.0344	26.5885	27.0153	26.6227	0.0448424	0.0548885
840	HSPA5	P11021	78 kDa glucose-regulated protein	41	545	31.2177	31.2545	31.5462	32.4746	32.4973	32.4398	1.13109	3.37158
841	HSPA6;HSPA7	P17066;P48741	Heat shock 70 kDa protein 6;Putative heat shock 70 kDa protein 7	14	30	27.7267	23.6946	28.9926	28.3964	28.8917	28.9236	1.93261	0.529731
842	HSPA8	P11142	Heat shock cognate 71 kDa protein	38	503	31.1295	31.3566	31.7396	32.1843	32.4104	32.1945	0.854511	1.94359
843	HSPA9	P38646	Stress-70 protein, mitochondrial	36	527	31.4659	31.3456	31.5519	32.3532	32.3117	32.3024	0.867971	3.82498
844	HSPB1	P04792	Heat shock protein beta-1	2	6	24.5619	24.4755	24.1726	23.9256	24.0825	24.154	-0.349304	1.20757
845	HSPD1	P10809	60 kDa heat shock protein, mitochondrial	51	846	33.2321	33.3318	33.5733	32.9918	33.248	32.9971	-0.300091	1.06906
846	HSPH1	Q92598	Heat shock protein 105 kDa	25	177	28.6751	28.853	29.1502	29.7463	29.7681	29.6169	0.817702	2.29757
847	HTATSF1	O43719	HIV Tat-specific factor 1	7	87	27.5361	27.7056	28.1608	28.2654	28.3034	28.3679	0.511412	1.27008
848	HUWE1	Q7Z6Z7	E3 ubiquitin-protein ligase HUWE1	27	173	28.8945	29.1185	29.2701	29.1282	29.1766	29.2723	0.098018	0.34743
849	IARS	P41252	Isoleucine--tRNA ligase, cytoplasmic	27	151	29.2721	29.9584	29.6182	29.0177	29.0287	29.0125	-0.596593	1.40314
850	IARS2	Q9NSE4	Isoleucine--tRNA ligase, mitochondrial	10	71	27.7123	28.0594	28.1372	27.6575	27.7823	27.8073	-0.220556	0.728786
851	IDE	P14735	Insulin-degrading enzyme	3	15	25.011	25.6001	25.6878	24.9162	25.0203	24.5981	-0.588074	1.11714
852	IDH1	O75874	Isocitrate dehydrogenase [NADP] cytoplasmic	6	40	26.3771	26.6599	26.7148	26.062	26.2128	26.0189	-0.486003	1.81028
853	IDH2	P48735	Isocitrate dehydrogenase [NADP], mitochondrial	13	102	27.9633	28.3181	28.2079	27.6917	27.899	27.7561	-0.380845	1.45634
854	IDH3A	P50213	Isocitrate dehydrogenase [NAD] subunit alpha, mitochondrial	8	37	27.5193	27.8815	27.4728	26.7991	26.9971	26.9671	-0.703447	2.0992
855	IDH3B	O43837	Isocitrate dehydrogenase [NAD] subunit beta, mitochondrial	11	76	27.6241	28.3338	27.8275	27.9145	28.3743	28.1187	0.207368	0.344369
856	IDH3G	P51553	Isocitrate dehydrogenase [NAD] subunit gamma, mitochondrial	4	13	25.339	25.3893	25.121	25.2731	25.2828	25.5076	0.0713978	0.25185
857	IDI1	Q13907	Isopentenyl-diphosphate Delta-isomerase 1	1	17	23.3507	23.5322	23.9954	26.9677	26.4645	26.7178	3.09059	3.67317
858	IFIT5	Q13325	Interferon-induced protein with tetratricopeptide repeats 5	15	102	24.0463	24.4381	24.576	29.5597	29.5811	29.4508	5.17708	5.2247
859	IFRD1	O00458	Interferon-related developmental regulator 1	2	11	24.5289	23.0671	23.9054	26.4489	26.2592	26.0799	2.42888	2.29105
860	IFT74	Q96LB3	Intraflagellar transport protein 74 homolog	3	12	24.4773	24.2467	25.1476	25.9284	25.9605	25.7544	1.25722	1.97483
861	IGBP1	P78318	Immunoglobulin-binding protein 1	6	24	23.6159	23.9165	23.1164	28.246	27.683	28.2733	4.51782	3.93189
862	IGF2BP1	Q9NZI8	Insulin-like growth factor 2 mRNA-binding protein 1	29	251	30.9603	30.7078	30.7743	30.322	30.523	30.4034	-0.397991	1.85204
863	IGF2BP2	Q9Y6M1	Insulin-like growth factor 2 mRNA-binding protein 2	16	85	27.7046	27.7208	27.3569	28.3112	28.7193	28.5468	0.931705	2.29055
864	IGF2BP3	O00425	Insulin-like growth factor 2 mRNA-binding protein 3	19	133	28.7321	28.9736	28.8633	28.498	28.5239	28.4364	-0.37028	2.11731
865	IK	Q13123	Protein Red	14	112	28.1302	28.0142	28.2513	28.674	28.5398	28.6213	0.479821	2.43475
866	ILF2	Q12905	Interleukin enhancer-binding factor 2	17	209	30.5273	30.9915	30.8211	29.4115	29.6215	29.3707	-1.31204	2.95811
867	ILF3	Q12906	Interleukin enhancer-binding factor 3	32	247	31.8074	30.7593	30.6265	30.2199	30.2755	30.252	-0.815272	1.02392
868	ILK	Q13418	Integrin-linked protein kinase	3	15	24.6716	25.8534	25.093	23.7346	24.7154	23.337	-1.27701	1.12028
869	ILKAP	Q9H0C8	Integrin-linked kinase-associated serine/threonine phosphatase 2C	10	65	27.4755	27.5268	27.4063	27.3836	27.3034	27.4563	-0.0884228	0.718299
870	IMMT	Q16891	MICOS complex subunit MIC60	18	61	28.5479	27.9394	28.288	28.0737	27.9299	28.0688	-0.234341	0.57123
871	IMPA1	P29218	Inositol monophosphatase 1	4	33	25.6421	26.8997	26.907	26.9072	27.071	27.091	0.540174	0.565325
872	INA	Q16352	Alpha-internexin	16	38	27.9321	27.8909	27.6472	26.5348	26.7647	27.0103	-1.05346	2.52431
873	INF2	Q27J81	Inverted formin-2	7	33	25.2772	25.5129	25.6547	26.1708	26.0986	26.4443	0.756308	2.1148
874	INPPL1	O15357	Phosphatidylinositol 3,4,5-trisphosphate 5-phosphatase 2	5	14	23.773	24.709	25.2047	26.0227	25.4002	25.6887	1.14162	1.17538
875	INTS12	Q96CB8	Integrator complex subunit 12	2	10	23.5218	24.4388	24.527	25.0959	25.1042	24.2821	0.664878	0.721718
876	INTS3	Q68E01	Integrator complex subunit 3	3	14	24.5379	24.9433	25.4825	25.3536	25.2737	25.1453	0.269616	0.408369
877	INTS7	Q9NVH2	Integrator complex subunit 7	3	24	26.9044	22.8487	24.886	27.4835	25.6636	28.1048	2.20431	0.731199
878	IPO4	Q8TEX9	Importin-4	11	33	26.5836	26.9996	26.616	26.2166	26.2032	25.2794	-0.833305	1.16022
879	IPO7	O95373	Importin-7	5	26	26.7655	26.5946	26.6438	27.0026	27.6352	27.0146	0.549505	1.20134
880	IPO9	Q96P70	Importin-9	5	22	25.3462	24.0309	23.9901	26.5649	26.5015	26.6542	2.11779	2.04127
881	IQGAP1	P46940	Ras GTPase-activating-like protein IQGAP1	21	53	29.8514	27.2741	27.2754	24.975	25.2867	25.619	-2.84009	1.49596
882	IRAK1	P51617	Interleukin-1 receptor-associated kinase 1	8	64	26.6736	27.1949	27.3306	27.6091	27.8003	27.5295	0.57995	1.26131
883	IRF2BP1	Q8IU81	Interferon regulatory factor 2-binding protein 1	6	24	26.0403	26.3595	26.6139	26.2449	26.1699	26.2259	-0.124298	0.301823
884	IRS4	O14654	Insulin receptor substrate 4	40	382	30.7588	30.8492	30.9742	31.4827	31.4792	31.4722	0.617297	3.22859
885	ISY1	Q9ULR0	Pre-mRNA-splicing factor ISY1 homolog	8	66	26.3673	26.5276	26.7549	28.4622	28.282	28.4177	1.83734	3.90657
886	ITCH	Q96J02	E3 ubiquitin-protein ligase Itchy homolog	3	18	24.9134	24.9635	25.0094	25.2096	25.1816	25.2424	0.249111	2.79088
887	ITPA	Q9BY32	Inosine triphosphate pyrophosphatase	6	46	27.1544	27.5568	27.5344	27.3773	27.2518	27.1613	-0.151723	0.451159
888	ITSN1	Q15811	Intersectin-1	18	104	24.5238	23.9486	23.923	29.4946	29.3606	29.3604	5.27342	4.90018
889	IVD	P26440	Isovaleryl-CoA dehydrogenase, mitochondrial	6	13	25.8185	26.7416	26.9559	25.7424	26.0756	25.5773	-0.706917	0.869125
890	JMJD1C	Q15652	Probable JmjC domain-containing histone demethylation protein 2C	29	152	23.2083	23.284	24.2318	30.3044	30.0624	30.2006	6.61444	4.40254
891	JUN	P05412	Transcription factor AP-1	3	7	25.4667	24.3614	23.065	24.9112	24.8469	25.1523	0.672422	0.407482
892	JUP	P14923	Junction plakoglobin	8	26	26.0916	25.9026	26.383	26.1372	26.0212	25.9996	-0.0730686	0.191622
893	KARS	Q15046	Lysine--tRNA ligase	23	134	30.1725	30.4179	30.4782	30.2152	30.288	30.2746	-0.096885	0.43119
894	KAT8	Q9H7Z6	Histone acetyltransferase KAT8	2	7	23.5617	23.2245	23.2064	25.4908	25.5348	25.3548	2.12927	4.12153
895	KATNB1	Q9BVA0	Katanin p80 WD40 repeat-containing subunit B1	3	6	23.2636	24.5515	23.1836	24.4061	24.1893	24.2009	0.599205	0.597312
896	KCTD12	Q96CX2	BTB/POZ domain-containing protein KCTD12	12	73	27.2814	27.6189	27.734	28.6701	28.3663	28.5781	0.99343	2.43691
897	KDM1A	O60341	Lysine-specific histone demethylase 1A	7	42	25.3141	27.3876	24.7335	26.5572	27.2142	26.4464	0.927585	0.479312
898	KDM3B	Q7LBC6	Lysine-specific demethylase 3B	24	118	27.2803	26.6291	28.2003	29.364	29.3206	29.3353	1.97006	1.90515
899	KHDRBS1	Q07666	KH domain-containing, RNA-binding, signal transduction-associated protein 1	8	53	28.7525	27.971	28.346	28.9356	28.6782	28.7873	0.443827	0.868818
900	KHSRP	Q92945	Far upstream element-binding protein 2	20	152	28.4432	28.672	29.0492	29.7465	29.6441	29.7409	0.989093	2.27386
901	KIAA1143	Q96AT1	Uncharacterized protein KIAA1143	4	24	23.0295	23.8494	23.7952	27.7042	27.2082	27.4381	3.89214	3.68515
902	KIAA1211	Q6ZU35	Uncharacterized protein KIAA1211	10	32	23.8091	23.9998	23.3681	27.3252	27.3496	27.5023	3.66668	4.32602
903	KIAA1217	Q5T5P2	Sickle tail protein homolog	5	11	24.7172	22.4728	24.403	24.9694	24.751	24.9717	1.03302	0.663654
904	KIAA1279	Q96EK5	KIF1-binding protein	6	26	26.8634	27.2105	27.0668	26.8196	26.7767	26.7096	-0.278252	1.2368
905	KIAA1524	Q8TCG1	Protein CIP2A	6	18	26.6041	23.4666	26.4912	27.9973	28.7478	27.7068	2.62997	1.15228
906	KIAA1598	A0MZ66	Shootin-1	15	81	23.0423	24.4909	24.6802	29.1753	29.1187	29.2966	5.12573	3.2262
907	KIAA1671	Q9BY89	Uncharacterized protein KIAA1671	20	46	25.0852	25.8894	24.6968	28.07	27.7671	28.3661	2.84391	2.7198
908	KIF11	P52732	Kinesin-like protein KIF11	22	133	28.7618	28.7228	29.127	29.5246	29.5103	29.4931	0.638803	2.11026
909	KIF14	Q15058	Kinesin-like protein KIF14	9	29	28.3376	25.1868	24.0304	28.2163	28.3493	28.2229	2.41127	0.871422
910	KIF15	Q9NS87	Kinesin-like protein KIF15	8	23	22.2549	23.9306	23.3114	27.1568	27.1274	26.9085	3.89859	2.85088
911	KIF1A	Q12756	Kinesin-like protein KIF1A	10	59	27.2012	27.6529	27.7203	27.3032	27.5222	27.3846	-0.121442	0.279014
912	KIF21A	Q7Z4S6	Kinesin-like protein KIF21A	7	23	24.1566	24.7271	26.8967	26.9672	26.6436	26.8768	1.56907	0.868923
913	KIF23	Q02241	Kinesin-like protein KIF23	9	24	26.9938	26.3655	26.2008	26.33	26.6645	26.6189	0.01776	0.0225229
914	KIF26A	Q9ULI4	Kinesin-like protein KIF26A	2	91	23.6822	24.889	23.7597	30.7165	31.1675	30.7568	6.76997	4.07968
915	KIF2A	O00139	Kinesin-like protein KIF2A	14	62	26.0873	26.8598	26.6933	28.5053	28.868	29.0804	2.27109	2.85112
916	KIF2C	Q99661	Kinesin-like protein KIF2C	8	37	23.0426	25.513	25.3301	26.5329	26.4132	26.502	1.85415	1.09586
917	KIF4A	O95239	Chromosome-associated kinesin KIF4A	31	140	25.4714	25.3774	25.857	29.7461	29.3513	29.713	4.03486	4.50334
918	KIF5B	P33176	Kinesin-1 heavy chain	47	394	30.2351	30.3372	30.6708	31.1534	31.3771	31.2512	0.846186	2.34933
919	KIF5C	O60282	Kinesin heavy chain isoform 5C	15	14	24.098	24.3282	24.1531	24.8968	25.5878	25.201	1.03548	2.09211
920	KIFC1	Q9BW19	Kinesin-like protein KIFC1	7	47	26.1714	24.2294	23.9926	27.477	27.1763	27.3307	2.53021	1.65724
921	KLC1	Q07866	Kinesin light chain 1	12	48	25.8572	26.1985	26.2677	27.5963	27.5727	27.659	1.50154	3.50062
922	KLC2	Q9H0B6	Kinesin light chain 2	15	100	27.5856	27.6842	28.1208	28.6566	28.7906	28.7782	0.944933	2.29096
923	KLC4	Q9NSK0	Kinesin light chain 4	9	14	24.7144	25.1146	25.0163	25.8737	26.0033	25.4859	0.839175	1.8872
924	KMT2A	Q03164	Histone-lysine N-methyltransferase 2A;MLL cleavage product N320;MLL cleavage product C180	4	11	24.2564	23.8633	23.2975	25.2888	25.082	25.7837	1.57914	1.98017
925	KMT2B	Q9UMN6	Histone-lysine N-methyltransferase 2B	10	22	24.8614	24.8247	23.0251	27.3825	27.4183	27.6064	3.232	2.215
926	KNOP1	Q1ED39	Lysine-rich nucleolar protein 1	12	44	25.6571	25.0317	25.9286	28.2999	28.1533	28.2019	2.6792	3.24332
927	KNSTRN	Q9Y448	Small kinetochore-associated protein	4	12	22.8842	22.5946	24.3375	25.9913	25.918	26.0023	2.69843	2.125
928	KNTC1	P50748	Kinetochore-associated protein 1	2	7	24.3574	24.0455	23.5822	25.4738	25.4167	25.3735	1.42629	2.48425
929	KPNA1	P52294	Importin subunit alpha-5;Importin subunit alpha-5, N-terminally processed	8	25	27.3703	27.8192	28.1118	27.8165	27.7912	27.7799	0.028773	0.0455529
930	KPNA2	P52292	Importin subunit alpha-1	13	121	28.7188	29.0827	29.1762	29.0319	28.9173	29.0432	0.0049146	0.0111644
931	KPNA3	O00505	Importin subunit alpha-4	5	44	27.6274	27.3442	27.6512	27.9073	27.9473	27.9898	0.407232	1.79764
932	KPNA6	O60684	Importin subunit alpha-7	14	78	28.4132	28.411	28.465	28.1364	28.1256	28.1616	-0.288533	3.81914
933	KPNB1	Q14974	Importin subunit beta-1	11	154	29.5253	29.8659	29.9796	29.4309	29.603	29.4506	-0.295461	0.940432
934	KRI1	Q8N9T8	Protein KRI1 homolog	7	24	26.1674	24.7376	25.05	27.2486	26.8876	26.9384	1.70651	1.72094
935	KRR1	Q13601	KRR1 small subunit processome component homolog	5	28	27.6638	26.673	26.0482	26.2442	26.3408	26.0898	-0.570069	0.527007
936	KRT18	P05783	Keratin, type I cytoskeletal 18	25	188	30.133	30.2432	30.1215	30.3081	30.4446	30.2069	0.153978	0.909159
937	KRT6B	P04259	Keratin, type II cytoskeletal 6B	17	10	24.9403	27.8283	24.5486	23.1072	24.074	23.3136	-2.27414	0.991886
938	KTI12	Q96EK9	Protein KTI12 homolog	4	23	26.5819	26.0449	26.1204	26.333	26.5973	26.3075	0.163582	0.354976
939	KTN1	Q86UP2	Kinectin	21	68	23.73	24.8956	24.679	27.5345	28.5771	29.2581	4.02173	2.54653
940	LAP3	P28838	Cytosol aminopeptidase	20	156	28.8563	29.1486	29.3802	29.1201	29.1202	28.8982	-0.0822067	0.186108
941	LARP1	Q6PKG0	La-related protein 1	62	699	26.459	26.767	27.5841	33.5338	33.4202	33.5395	6.5611	4.38206
942	LARP1B	Q659C4	La-related protein 1B	6	29	24.2304	24.472	23.9696	26.44	26.4672	26.428	2.2211	3.96886
943	LARP4	Q71RC2	La-related protein 4	14	106	28.2741	28.4474	28.3452	29.1891	29.282	29.238	0.880786	3.98991
944	LARP4B	Q92615	La-related protein 4B	15	88	27.996	28.7334	28.3583	28.3978	28.5804	28.3633	0.0846055	0.14025
945	LARP7	Q4G0J3	La-related protein 7	5	11	23.852	25.9383	25.7567	26.2229	25.9975	26.1447	0.9394	0.631137
946	LARS	Q9P2J5	Leucine--tRNA ligase, cytoplasmic	44	226	30.0931	30.2069	30.2085	29.2743	29.4602	29.2214	-0.850852	3.31481
947	LAS1L	Q9Y4W2	Ribosomal biogenesis protein LAS1L	4	26	26.4406	23.4946	26.5027	26.0754	26.0386	26.0626	0.579574	0.228693
948	LASP1	Q14847	LIM and SH3 domain protein 1	7	47	27.1765	27.402	27.8473	28.7844	28.6209	28.5811	1.18687	2.34138
949	LBR	Q14739	Lamin-B receptor	13	139	29.2354	29.5617	29.1416	30.3546	30.3775	30.5006	1.098	2.90373
950	LDHA	P00338	L-lactate dehydrogenase A chain	23	252	31.5894	32.0446	31.8644	31.7258	31.7927	31.7108	-0.0897446	0.266181
951	LDHB	P07195	L-lactate dehydrogenase B chain	18	207	31.7028	31.8878	31.8231	31.4762	31.7242	31.5655	-0.215944	1.12157
952	LEMD3	Q9Y2U8	Inner nuclear membrane protein Man1	12	68	27.0293	26.6266	27.1735	27.947	27.7437	27.8994	0.92026	2.20533
953	LEO1	Q8WVC0	RNA polymerase-associated protein LEO1	7	26	24.3728	24.2695	23.5923	27.5447	27.253	27.3033	3.28883	3.6429
954	LETM1	O95202	LETM1 and EF-hand domain-containing protein 1, mitochondrial	9	51	26.9852	27.6145	27.4054	27.3567	27.2179	26.9904	-0.146696	0.275709
955	LIG1	P18858	DNA ligase 1	17	59	27.3553	27.5532	27.6608	27.4977	27.5159	27.3962	-0.0531851	0.213029
956	LIG3	P49916	DNA ligase 3	22	132	28.8493	28.8835	28.8991	28.6181	28.7944	28.7003	-0.173052	1.50921
957	LIMA1	Q9UHB6	LIM domain and actin-binding protein 1	28	230	29.4275	29.2603	29.6169	31.0452	30.9603	31.0291	1.57667	3.92048
958	LIMCH1	Q9UPQ0	LIM and calponin homology domains-containing protein 1	2	4	24.2353	24.9305	23.4518	25.0792	24.7734	24.6766	0.637204	0.648589
959	LIMD1	Q9UGP4	LIM domain-containing protein 1	8	57	26.0731	25.9719	25.9418	27.6903	27.7157	27.8314	1.75022	5.11846
960	LIMD2	Q9BT23	LIM domain-containing protein 2	2	22	24.0024	23.6677	23.9959	26.4243	26.3638	26.481	2.53437	4.59189
961	LIN54	Q6MZP7	Protein lin-54 homolog	6	17	23.8125	24.4933	23.3385	26.4716	26.2008	26.2507	2.42625	2.6652
962	LLGL1	Q15334	Lethal(2) giant larvae protein homolog 1	11	24	26.9335	27.0778	26.7929	27.0796	27.05	26.9123	0.0792383	0.337166
963	LLPH	Q9BRT6	Protein LLP homolog	2	16	23.8831	24.0681	24.3221	26.5364	26.5128	26.5715	2.44909	4.35197
964	LMCD1	Q9NZU5	LIM and cysteine-rich domains protein 1	3	21	24.2819	25.0492	24.9858	25.5323	25.325	25.1119	0.550741	0.939363
965	LMNA	P02545	Prelamin-A/C;Lamin-A/C	7	52	27.8616	26.8291	27.1116	27.4566	27.2323	27.2424	0.0430291	0.0464946
966	LMNB1	P20700	Lamin-B1	48	492	32.117	31.2801	31.4514	30.9068	30.9391	30.8315	-0.723721	1.3174
967	LMNB2	Q03252	Lamin-B2	17	43	28.032	26.7577	27.2602	26.6823	26.4315	26.66	-0.758657	0.935614
968	LONP1	P36776	Lon protease homolog, mitochondrial	24	148	29.1491	29.5637	29.4334	28.4645	28.7063	28.4885	-0.828975	2.33877
969	LONRF2	Q1L5Z9	LON peptidase N-terminal domain and RING finger protein 2	3	9	24.368	23.6221	24.4977	25.1643	25.0457	24.9268	0.883034	1.45748
970	LPP	Q93052	Lipoma-preferred partner	8	37	26.9352	27.1564	27.31	27.8097	27.401	27.4727	0.427282	1.20622
971	LRBA	P50851	Lipopolysaccharide-responsive and beige-like anchor protein	18	70	27.4994	26.2858	27.5735	29.4939	28.9655	29.0898	2.06349	2.00442
972	LRCH2	Q5VUJ6	Leucine-rich repeat and calponin homology domain-containing protein 2	2	9	24.6645	25.2039	25.1122	24.0694	23.0185	25.0618	-0.943573	0.702063
973	LRPPRC	P42704	Leucine-rich PPR motif-containing protein, mitochondrial	31	197	29.9382	30.1743	29.8975	29.1479	29.3811	29.2138	-0.755718	2.61782
974	LRRC16A	Q5VZK9	Leucine-rich repeat-containing protein 16A	2	5	24.4338	22.2831	23.8212	24.9476	24.7711	25.5007	1.56044	1.08452
975	LRRC40	Q9H9A6	Leucine-rich repeat-containing protein 40	18	76	28.3935	28.8596	28.8138	27.5307	27.6128	27.5457	-1.1259	2.76815
976	LRRC41	Q15345	Leucine-rich repeat-containing protein 41	9	31	26.6806	27.082	27.3371	27.6329	27.3066	27.6416	0.493802	1.05162
977	LRRC47	Q8N1G4	Leucine-rich repeat-containing protein 47	32	351	30.7427	30.9507	30.8788	30.7387	30.5539	30.6043	-0.225126	1.28386
978	LRRC59	Q96AG4	Leucine-rich repeat-containing protein 59	6	63	27.0201	26.8202	27.2016	27.1425	27.3869	27.2413	0.242913	0.861987
979	LRRFIP1	Q32MZ4	Leucine-rich repeat flightless-interacting protein 1	14	92	24.9852	24.5599	23.3821	29.4009	29.3422	29.4689	5.09493	3.34771
980	LRWD1	Q9UFC0	Leucine-rich repeat and WD repeat-containing protein 1	7	55	27.2732	26.9555	27.2631	27.1822	27.3492	27.1657	0.0684261	0.223399
981	LSM12	Q3MHD2	Protein LSM12 homolog	10	94	27.8983	28.4803	28.6028	30.0906	30.2002	29.96	1.75646	2.81503
982	LSM14A	Q8ND56	Protein LSM14 homolog A	5	23	25.7778	25.7776	26.2332	28.9659	27.4265	27.2686	1.95744	1.59651
983	LSM14B	Q9BX40	Protein LSM14 homolog B	4	11	24.0422	23.8246	24.7976	27.431	26.5726	26.9899	2.77634	2.70697
984	LSM3	P62310	U6 snRNA-associated Sm-like protein LSm3	4	23	24.2941	23.4609	24.4815	26.0935	26.9781	26.9248	2.58662	2.43455
985	LSM4	Q9Y4Z0	U6 snRNA-associated Sm-like protein LSm4	3	19	25.2301	25.0703	23.8034	25.3431	25.3262	25.149	0.571512	0.556064
986	LTA4H	P09960	Leukotriene A-4 hydrolase	25	207	29.8088	30.1409	30.035	29.4887	29.7679	29.4582	-0.423278	1.41835
987	LTV1	Q96GA3	Protein LTV1 homolog	14	104	26.3925	25.3853	25.6484	30.4088	30.1152	30.2534	4.45039	3.84593
988	LUC7L2	Q9Y383	Putative RNA-binding protein Luc7-like 2	15	105	29.2971	28.9038	28.9138	28.2359	28.2025	28.1965	-0.826625	2.50301
989	LUC7L3	O95232	Luc7-like protein 3	4	12	26.0985	25.5927	25.7897	24.9087	25.0654	25.1629	-0.781289	2.04458
990	LUZP1	Q86V48	Leucine zipper protein 1	58	484	24.4941	23.6846	24.572	31.1487	32.3822	32.5393	7.77314	3.9223
991	LYAR	Q9NX58	Cell growth-regulating nucleolar protein	4	15	27.6594	26.3875	26.3256	24.9979	26.4721	24.5041	-1.46614	0.934193
992	LYPLA2	O95372	Acyl-protein thioesterase 2	9	44	25.2114	26.8799	27.4028	27.3313	28.0394	27.5016	1.12605	0.74425
993	LZTFL1	Q9NQ48	Leucine zipper transcription factor-like protein 1	2	13	23.2761	23.4749	23.7788	25.4532	25.5059	25.7914	2.07358	3.48906
994	MACF1	Q9UPN3	Microtubule-actin cross-linking factor 1, isoforms 1/2/3/5	10	19	23.6059	26.3308	26.4437	26.7434	26.644	26.7767	1.26123	0.609193
995	MAD1L1	Q9Y6D9	Mitotic spindle assembly checkpoint protein MAD1	3	9	24.3533	24.2272	24.549	25.0266	24.8306	24.6517	0.459783	1.48776
996	MAGED2	Q9UNF1	Melanoma-associated antigen D2	13	107	27.5803	27.4303	28.2215	28.5804	28.4015	28.661	0.803584	1.46532
997	MAK16	Q9BXY0	Protein MAK16 homolog	2	19	27.6892	24.9241	25.181	23.1539	23.7678	24.8099	-2.02092	0.939748
998	MAP1A	P78559	Microtubule-associated protein 1A;MAP1A heavy chain;MAP1 light chain LC2	6	15	23.7569	24.365	22.6011	25.7705	26.3222	26.0565	2.47539	1.98989
999	MAP1B	P46821	Microtubule-associated protein 1B;MAP1B heavy chain;MAP1 light chain LC1	63	583	30.5563	30.7184	31.0072	32.4427	32.5617	32.5512	1.7579	3.6693
1000	MAP1S	Q66K74	Microtubule-associated protein 1S;MAP1S heavy chain;MAP1S light chain	8	49	26.9641	26.8653	27.2727	27.9463	28.0019	28.0076	0.951255	2.80585
1001	MAP2K2	P36507	Dual specificity mitogen-activated protein kinase kinase 2	8	63	28.1426	27.9263	28.2859	28.0109	27.8715	27.799	-0.22446	0.857791
1002	MAP2K3	P46734	Dual specificity mitogen-activated protein kinase kinase 3	5	22	24.0262	23.8749	23.255	26.0641	25.9851	26.2922	2.39506	3.1565
1003	MAP2K7	O14733	Dual specificity mitogen-activated protein kinase kinase 7	3	13	24.6966	25.4858	25.117	24.5519	24.474	24.7988	-0.491571	0.925766
1004	MAP3K7	O43318	Mitogen-activated protein kinase kinase kinase 7	4	16	25.8496	22.3578	24.1702	27.2118	27.0118	27.0656	2.97051	1.37319
1005	MAP4	P27816	Microtubule-associated protein 4	73	886	25.3751	25.109	25.7376	34.4215	34.3136	34.3407	8.9514	5.9616
1006	MAP4K4	O95819	Mitogen-activated protein kinase kinase kinase kinase 4	8	31	25.4866	25.2957	25.6015	27.9032	26.8516	27.5632	1.97808	2.4465
1007	MAP4K5	Q9Y4K4	Mitogen-activated protein kinase kinase kinase kinase 5	7	22	26.0454	26.1246	26.5871	27.032	27.0052	27.8344	1.0382	1.50015
1008	MAP7	Q14244	Ensconsin	15	69	26.5231	26.4921	27.111	28.9706	28.8942	29.0308	2.25648	3.41059
1009	MAP7D1	Q3KQU3	MAP7 domain-containing protein 1	9	38	26.5659	27.0813	26.7798	26.7852	26.9183	26.7028	-0.00691859	0.01412
1010	MAP7D2	Q96T17	MAP7 domain-containing protein 2	9	27	23.712	23.8458	23.7634	27.2171	27.0507	27.188	3.37819	6.10153
1011	MAP7D3	Q8IWC1	MAP7 domain-containing protein 3	38	296	28.4256	27.3854	28.251	32.2313	30.8042	32.4801	3.81786	2.46984
1012	MAP9	Q49MG5	Microtubule-associated protein 9	4	9	25.1545	25.0854	24.1982	26.0237	25.9402	26.0603	1.19534	1.7399
1013	MAPRE1	Q15691	Microtubule-associated protein RP/EB family member 1	10	107	27.4603	27.6457	28.1063	29.7104	29.6372	29.5463	1.89387	3.17702
1014	MAPRE2	Q15555	Microtubule-associated protein RP/EB family member 2	20	290	28.7689	29.0288	29.4402	32.055	31.9867	32.0974	2.96707	3.93677
1015	MAPT	P10636	Microtubule-associated protein tau	8	37	23.9976	23.6729	23.658	27.9413	27.8447	27.8588	4.10542	5.43764
1016	MARK3	P27448	MAP/microtubule affinity-regulating kinase 3	5	21	24.966	23.5762	23.7181	27.0829	26.8229	26.9082	2.8512	2.50473
1017	MARS	P56192	Methionine--tRNA ligase, cytoplasmic	28	266	30.2863	30.6168	30.6103	30.2938	30.483	30.2773	-0.153045	0.528386
1018	MASTL	Q96GX5	Serine/threonine-protein kinase greatwall	3	8	23.5033	23.6482	23.3398	25.2357	25.4305	25.5024	1.89242	4.03174
1019	MAT2A	P31153	S-adenosylmethionine synthase isoform type-2	15	152	29.4677	29.7352	29.9552	29.5226	29.3724	29.2882	-0.324989	0.971405
1020	MAT2B	Q9NZL9	Methionine adenosyltransferase 2 subunit beta	3	8	23.8908	23.2752	23.7269	25.1648	25.1444	25.0351	1.48378	2.8521
1021	MATR3	P43243	Matrin-3	34	366	32.5224	32.1368	32.3464	31.3779	31.3735	31.3302	-0.974664	3.01035
1022	MAX	P61244	Protein max	3	16	22.7085	25.0437	23.4853	24.9796	25.6466	25.3114	1.56672	1.03175
1023	MBD3	O95983	Methyl-CpG-binding domain protein 3	13	124	27.868	27.7477	27.4591	29.2945	29.3949	29.3649	1.65988	3.73186
1024	MBNL1	Q9NR56	Muscleblind-like protein 1	8	56	27.2683	27.7838	27.701	26.7455	26.7599	26.4647	-0.92767	2.11763
1025	MCAT	Q8IVS2	Malonyl-CoA-acyl carrier protein transacylase, mitochondrial	7	42	26.7691	26.9589	26.5077	26.1516	26.5165	26.2247	-0.447637	1.22365
1026	MCCC1	Q96RQ3	Methylcrotonoyl-CoA carboxylase subunit alpha, mitochondrial	67	1365	35.9695	36.1693	36.5266	32.9593	32.9309	32.9882	-3.26234	4.42597
1027	MCCC2	Q9HCC0	Methylcrotonoyl-CoA carboxylase beta chain, mitochondrial	30	198	30.4828	30.988	31.3799	26.4795	26.8328	26.7814	-4.25233	3.94748
1028	MCM10	Q7L590	Protein MCM10 homolog	3	3	27.1417	27.17	27.2248	23.881	23.0702	23.7891	-3.59874	3.81804
1029	MCM2	P49736	DNA replication licensing factor MCM2	21	92	28.4958	29.2124	28.5943	28.6468	28.7856	28.5944	-0.0918541	0.147721
1030	MCM3	P25205	DNA replication licensing factor MCM3	35	259	30.4341	30.786	30.7734	30.1245	30.3477	30.2367	-0.428171	1.50039
1031	MCM4	P33991	DNA replication licensing factor MCM4	35	325	30.7363	31.0247	30.9249	30.6544	30.7492	30.7212	-0.187034	0.983824
1032	MCM5	P33992	DNA replication licensing factor MCM5	25	209	30.5193	30.557	30.5262	29.5858	29.8155	29.6958	-0.835147	3.61471
1033	MCM6	Q14566	DNA replication licensing factor MCM6	30	193	29.9975	30.5517	30.3158	29.5374	29.6821	29.5039	-0.713877	1.86647
1034	MCM7	P33993	DNA replication licensing factor MCM7	35	389	31.3012	31.6767	31.4035	30.3895	30.6856	30.3893	-0.972361	2.54162
1035	MCMBP	Q9BTE3	Mini-chromosome maintenance complex-binding protein	9	60	27.4702	27.637	27.8322	28.233	28.1609	28.2225	0.559009	2.19328
1036	MDC1	Q14676	Mediator of DNA damage checkpoint protein 1	49	212	30.8966	28.853	28.03	29.4574	29.3295	29.3877	0.131717	0.0531779
1037	MDH2	P40926	Malate dehydrogenase, mitochondrial	9	48	27.438	28.1097	27.9655	28.0125	28.1296	27.9361	0.188297	0.372453
1038	MED1	Q15648	Mediator of RNA polymerase II transcription subunit 1	13	39	23.7691	22.7989	23.8548	28.0352	27.8594	28.1498	4.54053	3.69603
1039	MEPCE	Q7L2J0	7SK snRNA methylphosphate capping enzyme	5	30	23.4956	23.5101	25.0709	27.9323	27.4601	27.6853	3.66706	2.60928
1040	METAP1	P53582	Methionine aminopeptidase 1	5	16	25.2808	24.6685	25.5557	25.6658	25.7512	25.2699	0.39398	0.583337
1041	METAP2	P50579	Methionine aminopeptidase 2	4	14	23.405	24.902	26.3834	26.3941	26.526	26.2543	1.49469	0.800117
1042	METTL2B	Q6P1Q9	Methyltransferase-like protein 2B	4	31	26.4516	25.8449	26.7874	27.1214	26.8502	27.0642	0.650623	1.0621
1043	METTL3	Q86U44	N6-adenosine-methyltransferase 70 kDa subunit	9	33	27.3559	27.3689	27.91	27.9714	27.7722	27.8991	0.33597	0.811268
1044	MFAP1	P55081	Microfibrillar-associated protein 1	16	117	28.2881	27.5718	27.506	29.9858	29.7771	30.0317	2.14288	2.91219
1045	MGA	Q8IWI9	MAX gene-associated protein	14	58	25.1838	24.1807	24.4878	28.0857	27.448	27.7586	3.14661	3.07574
1046	MGEA5	O60502	Protein O-GlcNAcase	10	68	27.0325	27.7658	27.5522	27.4233	27.6205	27.3453	0.0128593	0.0183777
1047	MIA3	Q5JRA6	Melanoma inhibitory activity protein 3	2	6	22.8754	23.7989	23.2382	24.7023	24.8884	24.8459	1.50805	2.27193
1048	MICAL3	Q7RTP6	Protein-methionine sulfoxide oxidase MICAL3	9	25	23.6502	24.8347	24.0412	26.7548	26.6276	26.9041	2.5868	2.7131
1049	MICALL1	Q8N3F8	MICAL-like protein 1	9	23	24.5319	25.0316	24.2163	27.54	27.1518	27.4865	2.79953	3.33233
1050	MIF	P14174	Macrophage migration inhibitory factor	8	70	29.188	29.4983	29.6255	29.1702	28.8942	29.1959	-0.350511	1.01621
1051	MIPEP	Q99797	Mitochondrial intermediate peptidase	7	26	26.5386	26.4674	26.5119	25.847	25.8435	25.964	-0.621138	3.80723
1052	MKI67	P46013	Antigen KI-67	113	414	32.651	29.2128	27.9026	30.6988	30.8208	31.0345	0.929302	0.260939
1053	MKL2	Q9ULH7	MKL/myocardin-like protein 2	45	620	23.0734	22.8161	23.8469	33.5666	33.4734	33.6224	10.3087	5.29629
1054	MLF2	Q15773	Myeloid leukemia factor 2	5	17	26.2768	26.6075	26.4129	26.2971	23.7399	26.4323	-0.942696	0.462308
1055	MLH1	P40692	DNA mismatch repair protein Mlh1	4	22	23.0356	23.9223	25.4839	26.5691	26.5932	26.6232	2.44796	1.57209
1056	MLLT11	Q13015	Protein AF1q	4	29	26.8742	26.8267	27.0881	26.3614	26.4051	26.6595	-0.454351	1.68027
1057	MLLT4	P55196	Afadin	53	386	26.6913	26.7415	27.499	32.0953	31.694	31.8501	4.90254	4.16669
1058	MMGT1	Q8N4V1	Membrane magnesium transporter 1	2	5	25.5798	25.5155	26.0303	24.427	24.2715	25.2031	-1.07466	1.50387
1059	MMTAG2	Q9BU76	Multiple myeloma tumor-associated protein 2	6	22	26.5309	26.9318	26.6137	26.5936	26.5483	26.8674	-0.0223446	0.0485818
1060	MOB4	Q9Y3A3	MOB-like protein phocein	2	8	22.9466	24.26	23.8371	25.1555	24.7569	25.2636	1.37746	1.52636
1061	MORC2	Q9Y6X9	MORC family CW-type zinc finger protein 2	3	11	23.9284	24.6309	23.7851	26.4226	26.3545	26.4286	2.28707	3.02013
1062	MORF4L1	Q9UBU8	Mortality factor 4-like protein 1	4	23	25.8551	25.0943	25.7241	26.1206	26.1792	26.1876	0.604681	1.20527
1063	MPG	P29372	DNA-3-methyladenine glycosylase	5	8	25.5804	25.6381	25.7674	25.0139	23.3547	24.3607	-1.41884	1.36453
1064	MPST	P25325	3-mercaptopyruvate sulfurtransferase	2	6	24.7284	23.4675	23.0564	24.1115	24.3706	24.3896	0.539791	0.455516
1065	MRE11A	P49959	Double-strand break repair protein MRE11A	35	277	28.7763	29.0021	28.8251	31.7989	31.6748	31.8484	2.90625	5.34263
1066	MRI1	Q9BV20	Methylthioribose-1-phosphate isomerase	7	31	27.4484	28.2486	28.0029	27.7047	27.7305	27.6724	-0.197421	0.344703
1067	MRPL11	Q9Y3B7	39S ribosomal protein L11, mitochondrial	5	18	27.0887	25.5411	25.9665	25.702	25.6863	25.4528	-0.585075	0.553003
1068	MRPL12	P52815	39S ribosomal protein L12, mitochondrial	7	23	26.5478	26.4699	26.7797	26.3549	26.4636	26.2456	-0.244437	1.02153
1069	MRPL15	Q9P015	39S ribosomal protein L15, mitochondrial	4	29	26.8097	26.2258	26.2223	26.3316	26.3147	26.6399	0.00946172	0.0141038
1070	MRPL16	Q9NX20	39S ribosomal protein L16, mitochondrial	3	10	24.9898	25.0782	25.3029	24.3554	23.9896	24.9479	-0.692648	1.10655
1071	MRPL17	Q9NRX2	39S ribosomal protein L17, mitochondrial	5	25	24.6535	25.2152	24.7411	24.9586	24.7275	24.7011	-0.0741889	0.142771
1072	MRPL28	Q13084	39S ribosomal protein L28, mitochondrial	2	14	22.3964	22.7411	24.6618	24.8217	24.2952	24.7734	1.36363	0.876318
1073	MRPL3	P09001	39S ribosomal protein L3, mitochondrial	3	8	23.6026	25.401	25.9357	25.8027	25.5533	25.5325	0.649726	0.384587
1074	MRPL37	Q9BZE1	39S ribosomal protein L37, mitochondrial	3	12	24.5655	24.3977	25.1482	25.0337	24.6323	24.9414	0.165345	0.254806
1075	MRPL39	Q9NYK5	39S ribosomal protein L39, mitochondrial	4	27	25.9501	26.2077	26.3735	26.2064	26.2945	26.4064	0.12539	0.388285
1076	MRPL4	Q9BYD3	39S ribosomal protein L4, mitochondrial	2	26	26.4294	26.6845	26.4757	25.5471	25.8947	25.6171	-0.843519	2.51184
1077	MRPL43	Q8N983	39S ribosomal protein L43, mitochondrial	2	11	23.1912	23.5294	23.2803	25.2183	25.3588	25.2406	1.93891	4.21233
1078	MRPL45	Q9BRJ2	39S ribosomal protein L45, mitochondrial	3	14	25.591	24.3208	23.741	26.3324	26.0732	26.1856	1.64614	1.39223
1079	MRPL47	Q9HD33	39S ribosomal protein L47, mitochondrial	4	7	24.9569	25.1865	24.7594	24.6139	24.8595	24.7339	-0.23183	0.748042
1080	MRPL49	Q13405	39S ribosomal protein L49, mitochondrial	2	22	24.5735	24.6504	24.9533	25.0484	24.3007	24.8201	-0.00261561	0.00342449
1081	MRPL50	Q8N5N7	39S ribosomal protein L50, mitochondrial	2	7	25.3888	24.5443	25.2706	25.0169	24.8458	25.1249	-0.0720539	0.0930723
1082	MRPL53	Q96EL3	39S ribosomal protein L53, mitochondrial	3	14	23.5872	25.3375	24.0494	25.341	25.1578	24.9299	0.818215	0.694045
1083	MRPS14	O60783	28S ribosomal protein S14, mitochondrial	2	23	26.2948	26.1116	26.1238	26.279	26.6105	26.4804	0.279894	1.16341
1084	MRPS18B	Q9Y676	28S ribosomal protein S18b, mitochondrial	4	22	25.8842	25.7568	24.1625	25.63	25.2842	25.3701	0.160216	0.102211
1085	MRPS2	Q9Y399	28S ribosomal protein S2, mitochondrial	2	22	25.338	24.4669	25.6267	26.96	27.1353	27.2286	1.9641	2.27229
1086	MRPS21	P82921	28S ribosomal protein S21, mitochondrial	2	11	23.9445	24.0873	24.2241	24.3365	24.6597	24.5478	0.429358	1.58413
1087	MRPS22	P82650	28S ribosomal protein S22, mitochondrial	5	37	25.9909	26.4508	26.1327	26.9772	26.9301	26.97	0.767628	2.30547
1088	MRPS23	Q9Y3D9	28S ribosomal protein S23, mitochondrial	3	13	25.7857	26.0516	26.2207	24.8743	25.5317	25.8547	-0.59911	0.886223
1089	MRPS26	Q9BYN8	28S ribosomal protein S26, mitochondrial	6	18	23.0878	23.9778	26.094	26.152	25.9223	26.0902	1.66825	0.868014
1090	MRPS31	Q92665	28S ribosomal protein S31, mitochondrial	5	11	26.0158	23.1776	25.5799	25.6627	25.963	25.9209	0.924452	0.448114
1091	MRPS35	P82673	28S ribosomal protein S35, mitochondrial	3	12	25.7447	23.9796	24.5375	25.6649	25.7046	25.4506	0.852783	0.742738
1092	MRPS5	P82675	28S ribosomal protein S5, mitochondrial	2	11	23.5778	24.972	25.0332	24.8207	25.063	25.0279	0.44287	0.387748
1093	MRPS7	Q9Y2R9	28S ribosomal protein S7, mitochondrial	7	24	27.044	26.9539	27.3468	26.8012	27.0231	26.5222	-0.332764	0.822631
1094	MRPS9	P82933	28S ribosomal protein S9, mitochondrial	7	10	25.7765	25.8398	26.0875	25.6048	25.5169	25.4095	-0.390851	1.61959
1095	MRTO4	Q9UKD2	mRNA turnover protein 4 homolog	8	30	27.8615	26.8804	26.8708	26.2368	26.5304	26.3642	-0.82714	1.14586
1096	MSANTD2	Q6P1R3	Myb/SANT-like DNA-binding domain-containing protein 2	5	9	24.1849	23.5319	23.6229	25.5451	25.3654	25.7813	1.78403	2.77745
1097	MSH2	P43246	DNA mismatch repair protein Msh2	20	112	28.3419	29.0849	28.8056	28.4083	28.648	28.5036	-0.224154	0.419654
1098	MSH3	P20585	DNA mismatch repair protein Msh3	5	20	25.4598	25.4961	25.6382	25.9787	26.562	26.5061	0.817577	1.87117
1099	MSH6	P52701	DNA mismatch repair protein Msh6	28	142	29.1997	29.4025	29.4872	29.7511	29.6844	29.8418	0.395957	1.82585
1100	MSI2	Q96DH6	RNA-binding protein Musashi homolog 2	3	15	26.9968	26.0338	26.6033	24.7101	25.9196	24.3497	-1.5515	1.31852
1101	MTA1	Q13330	Metastasis-associated protein MTA1	17	87	27.9595	27.5156	27.6193	29.2861	29.3273	29.1885	1.56914	3.43991
1102	MTA2	O94776	Metastasis-associated protein MTA2	21	144	27.9375	26.9834	27.6974	29.5911	29.6922	29.5439	2.06961	2.69138
1103	MTDH	Q86UE4	Protein LYRIC	22	295	28.4196	27.901	28.48	31.9961	31.8753	31.9624	3.67775	4.40189
1104	MTHFD1	P11586	C-1-tetrahydrofolate synthase, cytoplasmic;Methylenetetrahydrofolate dehydrogenase;Methenyltetrahydrofolate cyclohydrolase;Formyltetrahydrofolate synthetase;C-1-tetrahydrofolate synthase, cytoplasmic, N-terminally processed	71	800	32.544	32.7493	32.8939	32.2638	32.2656	32.2695	-0.46276	1.98459
1105	MTHFD1L	Q6UB35	Monofunctional C1-tetrahydrofolate synthase, mitochondrial	23	115	28.969	29.6455	29.3845	28.4923	28.5435	28.2323	-0.91028	1.84647
1106	MTMR1	Q13613	Myotubularin-related protein 1	3	13	25.3409	25.4208	26.1788	24.9831	24.8195	24.9396	-0.732773	1.26669
1107	MTMR6	Q9Y217	Myotubularin-related protein 6	2	18	23.2907	24.5522	23.8696	28.2405	28.1683	28.4551	4.38384	3.51578
1108	MTPAP	Q9NVV4	Poly(A) RNA polymerase, mitochondrial	4	7	25.6315	25.9007	25.8855	25.4996	25.7944	25.454	-0.223193	0.742873
1109	MTR	Q99707	Methionine synthase	9	30	25.8516	26.2095	26.4148	26.7307	27.1044	27.0119	0.790325	1.7801
1110	MTUS1	Q9ULD2	Microtubule-associated tumor suppressor 1	13	40	25.4703	25.18	24.9261	28.6135	28.2395	28.4994	3.25867	4.14859
1111	MUC16	Q8WXI7	Mucin-16	2	6	24.732	23.2722	24.3787	26.4872	26.2857	26.5942	2.32809	2.18184
1112	MUT	P22033	Methylmalonyl-CoA mutase, mitochondrial	2	12	25.3446	25.3808	25.3209	23.9803	24.4929	24.3631	-1.07	2.63789
1113	MYBBP1A	Q9BQG0	Myb-binding protein 1A	27	164	29.4911	29.4895	29.4415	29.4419	29.3303	29.3747	-0.0917753	1.18843
1114	MYH10	P35580	Myosin-10	36	109	29.717	28.8749	29.1248	28.5911	28.6122	28.6598	-0.617842	1.15965
1115	MYH9	P35579	Myosin-9	99	968	31.9055	31.8858	32.0938	32.5461	32.7054	32.6337	0.666721	2.93078
1116	MYL12A;MYL12B	P19105;O14950	Myosin regulatory light chain 12A;Myosin regulatory light chain 12B	4	12	27.1273	26.0573	26.0491	22.6516	24.5709	24.2358	-2.59177	1.69888
1117	MYL6	P60660	Myosin light polypeptide 6	8	124	29.7393	28.952	28.7779	29.3486	29.4702	29.4923	0.280587	0.39652
1118	MYO1B	O43795	Unconventional myosin-Ib	7	19	26.041	26.4244	26.0741	25.714	25.4647	25.3222	-0.679512	1.81046
1119	MYO1C	O00159	Unconventional myosin-Ic	6	20	27.5502	28.0289	27.8393	26.7651	26.7831	26.9576	-0.970862	2.5097
1120	MYO1D	O94832	Unconventional myosin-Id	5	11	25.3288	24.5176	25.6382	26.349	26.2658	25.5813	0.903816	1.02687
1121	MYO6	Q9UM54	Unconventional myosin-VI	19	106	28.513	28.2824	28.619	28.8798	28.8436	28.67	0.326354	1.28998
1122	N4BP1	O75113	NEDD4-binding protein 1	4	17	24.4057	24.5571	24.425	26.5314	26.0243	26.2122	1.79338	3.49168
1123	NAA10	P41227	N-alpha-acetyltransferase 10	8	82	28.5704	28.7389	28.8478	28.7113	28.8697	28.6782	0.0339909	0.12431
1124	NAA15	Q9BXJ9	N-alpha-acetyltransferase 15, NatA auxiliary subunit	12	79	27.7897	28.2518	28.1084	28.0752	28.479	28.319	0.241064	0.599118
1125	NAA30	Q147X3	N-alpha-acetyltransferase 30	2	20	23.6086	24.654	25.4932	27.7663	27.4722	27.5836	3.02209	2.2668
1126	NAA50	Q9GZZ1	N-alpha-acetyltransferase 50	6	90	28.6723	28.9062	29.0712	29.3503	29.1677	29.2066	0.358316	1.30757
1127	NACA	E9PAV3;Q13765	Nascent polypeptide-associated complex subunit alpha, muscle-specific form;Nascent polypeptide-associated complex subunit alpha	3	26	23.4911	23.8223	26.012	26.7479	27.1859	27.0869	2.56511	1.4822
1128	NACC1	Q96RE7	Nucleus accumbens-associated protein 1	2	7	24.6424	23.6297	25.2001	25.4027	25.6505	25.4473	1.00946	1.01695
1129	NAE1	Q13564	NEDD8-activating enzyme E1 regulatory subunit	4	8	22.61	24.966	24.2427	25.2491	25.4795	25.1644	1.35807	0.900982
1130	NAMPT	P43490	Nicotinamide phosphoribosyltransferase	18	115	29.7858	30.1346	29.9321	29.0112	29.1406	29.0186	-0.894042	2.9125
1131	NANS	Q9NR45	Sialic acid synthase	13	140	29.282	29.5295	29.6332	29.1103	29.2799	29.1153	-0.31309	1.24447
1132	NAP1L1	P55209	Nucleosome assembly protein 1-like 1	19	212	30.6899	30.1785	30.1136	30.4714	30.944	30.6761	0.369814	0.744843
1133	NAP1L4	Q99733	Nucleosome assembly protein 1-like 4	19	134	23.5329	23.3652	23.4601	30.0405	30.5701	29.6911	6.6478	4.85645
1134	NARS	O43776	Asparagine--tRNA ligase, cytoplasmic	22	231	30.384	30.3898	30.4315	29.821	29.8511	29.7734	-0.586591	4.56659
1135	NASP	P49321	Nuclear autoantigenic sperm protein	27	308	25.3819	25.8957	26.6316	31.9388	31.9976	32.0263	6.01781	4.10778
1136	NAT10	Q9H0A0	N-acetyltransferase 10	12	63	27.9908	27.5936	27.2939	27.715	27.9464	27.7707	0.184599	0.360396
1137	NAV1	Q8NEY1	Neuron navigator 1	6	31	24.4409	23.401	24.1985	27.7418	27.0042	27.4194	3.37499	3.05246
1138	NBN	O60934	Nibrin	4	20	22.9657	24.1922	25.4304	26.4017	26.0497	26.0972	1.98673	1.29344
1139	NCAPD2	Q15021	Condensin complex subunit 1	4	18	25.0345	25.5399	25.074	25.2981	25.4634	24.196	-0.230345	0.207409
1140	NCAPD3	P42695	Condensin-2 complex subunit D3	2	18	25.1726	25.4005	25.3424	25.8456	25.5752	25.5343	0.346553	1.35845
1141	NCAPH	Q15003	Condensin complex subunit 2	15	86	28.3228	28.5421	28.7543	29.048	29.1034	29.0193	0.517175	1.81831
1142	NCBP2	P52298	Nuclear cap-binding protein subunit 2	3	17	24.3968	23.6949	25.0988	25.6112	25.6855	25.7723	1.29284	1.46999
1143	NCKAP1	Q9Y2A7	Nck-associated protein 1	4	13	25.81	25.6688	26.0827	25.787	25.786	25.543	-0.148464	0.435384
1144	NCL	P19338	Nucleolin	51	771	33.0033	32.7521	32.9538	33.0912	33.3793	33.1695	0.310228	1.26244
1145	NCLN	Q969V3	Nicalin	6	24	27.1496	27.0166	27.252	26.6588	26.5599	26.9024	-0.432341	1.61555
1146	NCOA5	Q9HCD5	Nuclear receptor coactivator 5	7	20	27.0029	25.0924	25.205	23.6092	24.2429	23.9495	-1.83293	1.32906
1147	NCOA7	Q8NI08	Nuclear receptor coactivator 7	5	14	23.9983	24.1943	22.4187	28.6112	28.3891	28.3222	4.90373	3.0021
1148	NCOR1	O75376	Nuclear receptor corepressor 1	6	20	25.822	25.6433	26.2333	26.4679	26.9365	27.2856	0.997122	1.55939
1149	NDC1	Q9BTX1	Nucleoporin NDC1	5	24	25.967	25.9816	25.9849	25.9029	25.9544	25.7357	-0.113472	0.79065
1150	NDE1;NDEL1	Q9NXR1;Q9GZM8	Nuclear distribution protein nudE homolog 1;Nuclear distribution protein nudE-like 1	4	22	23.9492	23.9792	24.1202	25.4634	25.1916	25.5975	1.40128	3.36986
1151	NDRG1	Q92597	Protein NDRG1	8	105	28.281	28.3902	28.6575	28.9032	28.9869	28.9103	0.490606	1.8863
1152	NDUFA10	O95299	NADH dehydrogenase [ubiquinone] 1 alpha subcomplex subunit 10, mitochondrial	4	12	25.864	26.0307	25.7973	24.2945	25.16	25.475	-0.920816	1.20326
1153	NDUFA2	O43678	NADH dehydrogenase [ubiquinone] 1 alpha subcomplex subunit 2	3	12	24.6348	23.7543	23.4819	25.4215	25.6213	25.8162	1.66265	1.97948
1154	NDUFA5	Q16718	NADH dehydrogenase [ubiquinone] 1 alpha subcomplex subunit 5	6	27	26.1944	27.2037	26.9129	25.9928	26.259	25.8897	-0.723104	1.06363
1155	NDUFA9	Q16795	NADH dehydrogenase [ubiquinone] 1 alpha subcomplex subunit 9, mitochondrial	2	9	24.3405	24.606	24.6398	25.1017	25.6065	23.2167	0.11288	0.0529976
1156	NDUFS1	P28331	NADH-ubiquinone oxidoreductase 75 kDa subunit, mitochondrial	5	13	26.1954	26.1881	26.1173	25.3692	24.1879	23.8756	-1.68937	1.68447
1157	NDUFS3	O75489	NADH dehydrogenase [ubiquinone] iron-sulfur protein 3, mitochondrial	4	33	27.2344	27.1631	27.2613	27.1746	27.6663	27.1925	0.124844	0.311556
1158	NDUFS8	O00217	NADH dehydrogenase [ubiquinone] iron-sulfur protein 8, mitochondrial	3	10	24.3526	24.5088	25.1046	24.189	25.0901	24.5331	-0.0513172	0.0505891
1159	NEDD1	Q8NHV4	Protein NEDD1	5	39	26.8014	27.103	26.9257	27.847	27.565	27.8238	0.801873	2.50776
1160	NEDD8	Q15843	NEDD8	2	23	26.3311	26.4003	26.8844	26.4465	26.8437	26.6443	0.106289	0.195913
1161	NEFL	P07196	Neurofilament light polypeptide	3	6	24.8869	23.7914	24.9109	23.9512	23.6462	23.5446	-0.815763	0.983223
1162	NEK4	P51957	Serine/threonine-protein kinase Nek4	5	5	22.8215	24.4681	24.4072	25.4084	25.4382	25.4282	1.52601	1.32512
1163	NEK7;NEK6	Q8TDX7;Q9HC98	Serine/threonine-protein kinase Nek7;Serine/threonine-protein kinase Nek6	2	6	23.9072	24.2153	24.2563	24.2484	24.2154	23.8995	-0.00517845	0.0109091
1164	NEK9	Q8TD19	Serine/threonine-protein kinase Nek9	4	12	25.0609	25.5645	24.4022	25.933	27.0244	25.2625	1.06412	0.801184
1165	NELFB	Q8WX92	Negative elongation factor B	2	18	23.7153	24.0208	24.2337	25.1542	25.3177	24.9026	1.1349	2.37969
1166	NELFE	P18615	Negative elongation factor E	13	98	24.3986	24.5191	24.9172	29.371	29.3359	29.5097	4.7939	5.07375
1167	NFS1	Q9Y697	Cysteine desulfurase, mitochondrial	2	6	23.5756	25.0321	23.8755	25.1996	25.4254	25.222	1.12124	1.17201
1168	NFXL1	Q6ZNB6	NF-X1-type zinc finger protein NFXL1	3	22	25.7148	25.5246	26.1545	25.6133	25.4155	26.0558	-0.103075	0.143956
1169	NHLRC2	Q8NBF2	NHL repeat-containing protein 2	5	21	24.8865	23.9781	23.156	25.3941	25.79	25.4846	1.54939	1.4049
1170	NHP2L1	P55769	NHP2-like protein 1;NHP2-like protein 1, N-terminally processed	6	27	29.5498	26.9708	27.2226	26.733	26.7074	27.3348	-0.989341	0.512558
1171	NIPBL	Q6KC79	Nipped-B-like protein	7	34	24.9686	25.0768	25.086	27.3961	26.9605	27.1908	2.13864	4.07965
1172	NKAP	Q8N5F7	NF-kappa-B-activating protein	2	20	26.3225	26.6006	26.6122	25.729	25.9672	25.7242	-0.704934	2.3243
1173	NKRF	O15226	NF-kappa-B-repressing factor	6	18	27.7679	27.0696	26.6819	26.631	26.8506	26.9537	-0.361354	0.472134
1174	NME2;NME2P1;NME1	P22392;O60361;P15531	Nucleoside diphosphate kinase B;Putative nucleoside diphosphate kinase;Nucleoside diphosphate kinase A	5	22	27.9605	27.4634	27.9794	27.6952	27.9593	27.8217	0.0242856	0.044757
1175	NME3	Q13232	Nucleoside diphosphate kinase 3	3	14	25.0323	25.628	25.4106	25.4124	25.5419	25.5626	0.148657	0.341121
1176	NMT1	P30419	Glycylpeptide N-tetradecanoyltransferase 1	7	24	26.4856	22.8164	24.4764	28.3058	27.6754	27.7045	3.30243	1.42261
1177	NOB1	Q9ULX3	RNA-binding protein NOB1	12	99	28.5661	28.5279	28.4758	28.9434	28.863	28.726	0.32084	2.02259
1178	NOC2L	Q9Y3T9	Nucleolar complex protein 2 homolog	5	19	26.0662	26.3955	25.9018	26.5198	26.7208	25.9815	0.286172	0.469082
1179	NOC3L	Q8WTT2	Nucleolar complex protein 3 homolog	6	30	27.7224	26.6836	27.4672	26.6453	26.2482	26.6622	-0.772537	1.06617
1180	NOL6	Q9H6R4	Nucleolar protein 6	10	35	26.7484	26.7208	26.6232	25.8369	26.2978	26.1147	-0.614344	1.93584
1181	NOL7	Q9UMY1	Nucleolar protein 7	5	14	26.8897	24.8146	24.6811	25.1414	25.1981	25.8479	-0.0660222	0.0296115
1182	NOL8	Q76FK4	Nucleolar protein 8	12	51	26.3891	24.0786	23.3832	28.101	27.9871	28.142	3.45975	1.72006
1183	NOL9	Q5SY16	Polynucleotide 5-hydroxyl-kinase NOL9	5	20	28.8445	28.4661	28.1078	27.378	27.9971	27.881	-0.72083	1.18818
1184	NOLC1	Q14978	Nucleolar and coiled-body phosphoprotein 1	31	241	30.2227	27.6188	27.423	31.5853	31.1719	31.3267	2.93978	1.4948
1185	NOMO1;NOMO3;NOMO2	Q15155;P69849;Q5JPE7	Nodal modulator 1;Nodal modulator 3;Nodal modulator 2	2	8	24.7656	24.8042	25.8259	24.4454	23.9833	24.3485	-0.872838	1.0956
1186	NONO	Q15233	Non-POU domain-containing octamer-binding protein	50	967	32.9717	33.0699	33.1977	33.7982	33.7307	33.7304	0.673381	3.20456
1187	NOP10	Q9NPE3	H/ACA ribonucleoprotein complex subunit 3	3	19	26.4705	23.356	25.5264	26.179	26.19	26.1396	1.0519	0.498048
1188	NOP14	P78316	Nucleolar protein 14	11	40	27.1644	26.1714	26.9249	28.0215	27.4644	27.6793	0.968152	1.33116
1189	NOP16	Q9Y3C1	Nucleolar protein 16	7	44	27.4761	26.068	25.533	26.2518	26.0713	26.3871	-0.122313	0.0731228
1190	NOP2	P46087	Probable 28S rRNA (cytosine(4447)-C(5))-methyltransferase	29	124	30.5479	29.0572	28.8154	28.4558	28.3663	28.441	-1.05251	0.905441
1191	NOP56	O00567	Nucleolar protein 56	23	92	30.3944	28.109	27.4332	28.0858	28.2767	28.2665	-0.435876	0.18521
1192	NOP58	Q9Y2X3	Nucleolar protein 58	22	94	30.413	28.1781	27.4429	27.6475	27.9188	27.9017	-0.855328	0.403968
1193	NOSIP	Q9Y314	Nitric oxide synthase-interacting protein	8	56	28.0095	27.9007	28.2488	28.4237	27.95	28.1541	0.122957	0.290007
1194	NPLOC4	Q8TAT6	Nuclear protein localization protein 4 homolog	18	87	28.3915	28.9967	28.2896	28.7191	28.7971	28.5254	0.121319	0.198658
1195	NPM1	P06748	Nucleophosmin	28	794	34.3776	32.7438	32.8837	34.8507	34.7288	34.8001	1.45815	1.30376
1196	NPM3	O75607	Nucleoplasmin-3	5	67	29.405	29.1025	29.605	29.431	29.723	29.4831	0.17485	0.436902
1197	NRBF2	Q96F24	Nuclear receptor-binding factor 2	6	37	24.1666	23.6072	23.5727	28.1532	28.1594	28.2394	4.40184	4.64675
1198	NSF	P46459	Vesicle-fusing ATPase	23	122	28.952	29.1886	29.1751	28.545	28.6368	28.5215	-0.53745	2.50654
1199	NSFL1C	Q9UNZ2	NSFL1 cofactor p47	16	149	23.696	24.3237	24.7942	29.61	31.4946	31.5326	6.60773	3.12998
1200	NSRP1	Q9H0G5	Nuclear speckle splicing regulatory protein 1	9	27	23.8346	25.9401	24.7941	27.4718	27.96	27.559	2.80735	1.95842
1201	NSUN2	Q08J23	tRNA (cytosine(34)-C(5))-methyltransferase	41	392	31.1229	31.4025	31.3933	30.497	30.7598	30.5758	-0.695399	2.35181
1202	NT5DC1	Q5TFE4	5-nucleotidase domain-containing protein 1	9	50	27.838	28.2115	27.9739	26.899	27.2834	26.891	-0.983342	2.35889
1203	NTPCR	Q9BSD7	Cancer-related nucleoside-triphosphatase	8	53	27.9136	28.2908	28.1661	26.655	26.9588	26.9068	-1.28335	3.04247
1204	NUBP2	Q9Y5Y2	Cytosolic Fe-S cluster assembly factor NUBP2	4	38	28.3142	28.6883	28.8399	26.7971	27.3444	27.0895	-1.53712	2.6394
1205	NUCKS1	Q9H1E3	Nuclear ubiquitous casein and cyclin-dependent kinase substrate 1	7	34	27.1486	24.9919	23.9066	28.3384	27.8751	28.3939	2.85342	1.37759
1206	NUDC	Q9Y266	Nuclear migration protein nudC	22	231	28.4228	28.0824	28.4533	31.3094	31.4443	31.2845	3.02656	4.71076
1207	NUDCD3	Q8IVD9	NudC domain-containing protein 3	3	15	23.7273	24.8328	24.0114	25.0481	25.0375	25.0008	0.838271	1.18781
1208	NUDT19	A8MXV4	Nucleoside diphosphate-linked moiety X motif 19, mitochondrial	3	20	24.3883	25.9171	25.8616	25.5844	25.3385	25.7296	0.161796	0.114394
1209	NUDT21	O43809	Cleavage and polyadenylation specificity factor subunit 5	8	69	25.6754	23.873	25.4127	29.8597	29.7625	29.7413	4.80078	2.98288
1210	NUDT5	Q9UKK9	ADP-sugar pyrophosphatase	9	36	24.662	25.6388	23.4112	27.7069	27.7781	27.8788	3.21729	2.11806
1211	NUFIP2	Q7Z417	Nuclear fragile X mental retardation-interacting protein 2	34	415	26.9798	27.2863	27.6225	32.7883	32.7038	32.8069	5.47014	5.0778
1212	NUMA1	Q14980	Nuclear mitotic apparatus protein 1	55	134	30.4759	26.6799	25.4635	29.1529	29.4016	28.831	1.58876	0.4504
1213	NUP107	P57740	Nuclear pore complex protein Nup107	9	35	28.3364	28.6964	28.7992	27.916	27.8926	27.8203	-0.73435	2.16402
1214	NUP133	Q8WUM0	Nuclear pore complex protein Nup133	9	56	27.2701	27.7541	27.6787	27.2892	27.1333	27.0768	-0.401177	1.15585
1215	NUP153	P49790	Nuclear pore complex protein Nup153	32	164	27.6172	27.7416	28.255	29.6379	29.5992	30.0209	1.88138	2.86461
1216	NUP155	O75694	Nuclear pore complex protein Nup155	11	61	27.6653	27.9949	28.079	26.9091	27.3876	27.0554	-0.795713	1.86171
1217	NUP205	Q92621	Nuclear pore complex protein Nup205	4	25	24.9326	23.7409	24.3163	26.2568	26.6127	26.1203	2.00002	2.22922
1218	NUP214	P35658	Nuclear pore complex protein Nup214	33	305	29.3288	29.9066	29.8721	30.7998	30.7618	30.8969	1.11702	2.36705
1219	NUP50	Q9UKX7	Nuclear pore complex protein Nup50	10	43	25.7621	26.3941	26.3573	27.9985	27.5476	27.6233	1.55199	2.47974
1220	NUP62	P37198	Nuclear pore glycoprotein p62	2	13	23.7612	24.5818	24.0449	25.1558	25.6135	25.7367	1.3727	1.99801
1221	NUP88	Q99567	Nuclear pore complex protein Nup88	12	57	27.3778	27.9063	27.6603	28.3317	28.3899	28.1999	0.659005	1.81049
1222	NUP93	Q8N1F7	Nuclear pore complex protein Nup93	17	105	28.6769	29.0508	28.9763	28.9154	28.7603	28.7761	-0.0841281	0.27077
1223	NUP98	P52948	Nuclear pore complex protein Nup98-Nup96;Nuclear pore complex protein Nup98;Nuclear pore complex protein Nup96	7	17	26.0109	25.9132	26.8251	26.0701	26.4499	26.1621	-0.0223522	0.0240495
1224	NUPL2	O15504	Nucleoporin-like protein 2	2	12	24.4216	25.0476	24.7323	24.8727	25.0649	24.8225	0.186241	0.404362
1225	NVL	O15381	Nuclear valosin-containing protein-like	10	42	27.7272	27.5665	27.3166	26.867	27.2096	26.9209	-0.537543	1.54834
1226	NXF1	Q9UBU9	Nuclear RNA export factor 1	10	64	27.7062	27.3629	27.8145	27.4208	27.0697	27.6939	-0.233074	0.442426
1227	OAT	P04181	Ornithine aminotransferase, mitochondrial;Ornithine aminotransferase, hepatic form;Ornithine aminotransferase, renal form	13	104	28.9338	29.0544	29.0312	28.4283	28.5819	28.4465	-0.520944	2.98801
1228	OCRL	Q01968	Inositol polyphosphate 5-phosphatase OCRL-1	3	8	24.7883	24.8595	24.8865	23.5057	25.0587	24.9223	-0.349193	0.28289
1229	OFD1	O75665	Oral-facial-digital syndrome 1 protein	9	40	23.0691	24.6964	23.8652	27.4067	27.1746	27.3713	3.44063	2.71385
1230	OGFOD1	Q8N543	Prolyl 3-hydroxylase OGFOD1	4	23	25.8136	25.8703	25.8231	25.5125	26.2176	25.6066	-0.0567875	0.0912572
1231	OGT	O15294	UDP-N-acetylglucosamine--peptide N-acetylglucosaminyltransferase 110 kDa subunit	16	57	28.1864	28.2885	28.5722	28.0217	28.2348	28.2375	-0.18434	0.608933
1232	OPA1	O60313	Dynamin-like 120 kDa protein, mitochondrial;Dynamin-like 120 kDa protein, form S1	6	12	25.5778	25.5348	26.8266	25.2564	24.9855	24.6733	-1.00802	1.0385
1233	ORC2	Q13416	Origin recognition complex subunit 2	12	67	25.1742	25.5443	25.7923	30.2561	30.2272	30.2685	4.74702	4.91046
1234	OSBPL11	Q9BXB4	Oxysterol-binding protein-related protein 11	6	8	25.3873	25.0902	23.0548	26.2449	25.7235	26.017	1.48437	0.926877
1235	OSBPL3	Q9H4L5	Oxysterol-binding protein-related protein 3	3	11	25.2368	24.2778	24.0306	26.4442	25.9209	26.3454	1.72176	1.89461
1236	OSBPL6	Q9BZF3	Oxysterol-binding protein-related protein 6	4	7	23.0429	24.8079	24.8753	25.8101	25.9221	25.7851	1.5971	1.2469
1237	OSBPL8	Q9BZF1	Oxysterol-binding protein-related protein 8	5	18	25.6455	23.8289	23.1538	26.8255	26.9295	27.0015	2.70949	1.65562
1238	OSBPL9	Q96SU4	Oxysterol-binding protein-related protein 9	3	9	23.7807	24.4092	24.2838	24.7546	24.6599	24.4375	0.45941	1.0082
1239	OSGEP	Q9NPF4	Probable tRNA N6-adenosine threonylcarbamoyltransferase	7	32	26.6136	27.0454	26.8601	26.4462	26.3368	26.4046	-0.443796	1.57948
1240	OTUB1	Q96FW1	Ubiquitin thioesterase OTUB1	5	56	29.1593	29.2899	29.1071	27.9099	28.1326	27.9658	-1.18272	3.78659
1241	OTULIN	Q96BN8	Ubiquitin thioesterase otulin	2	2	24.8125	24.9498	25.3627	24.8088	23.9988	23.3244	-0.997654	1.0183
1242	OXA1L	Q15070	Mitochondrial inner membrane protein OXA1L	3	6	25.0977	25.0705	25.0512	24.7512	24.2988	24.7348	-0.478168	1.48855
1243	OXCT1	P55809	Succinyl-CoA:3-ketoacid coenzyme A transferase 1, mitochondrial	18	138	29.3842	29.796	29.5419	28.8199	29.0962	28.8469	-0.653049	1.92884
1244	P4HA1	P13674	Prolyl 4-hydroxylase subunit alpha-1	6	27	26.2872	26.2566	26.8382	26.3961	26.2355	26.6525	-0.0325985	0.0498127
1245	P4HB	P07237	Protein disulfide-isomerase	24	152	28.8518	29.1314	29.1988	29.4087	29.4321	29.281	0.313258	1.2655
1246	PA2G4	Q9UQ80	Proliferation-associated protein 2G4	40	553	32.3915	32.6657	32.5167	31.933	32.2344	32.1352	-0.423756	1.62836
1247	PABPC1	P11940	Polyadenylate-binding protein 1	47	474	30.2724	30.3539	30.4	32.8006	32.9407	32.8618	2.52561	5.86818
1248	PABPC4	Q13310	Polyadenylate-binding protein 4	42	208	29.0935	29.1971	29.3595	31.5802	31.722	31.6426	2.43157	4.9994
1249	PABPN1	Q86U42	Polyadenylate-binding protein 2	5	29	26.1423	26.0967	26.364	26.27	26.239	26.628	0.177998	0.52278
1250	PACSIN2	Q9UNF0	Protein kinase C and casein kinase substrate in neurons protein 2	7	25	26.0393	26.2607	26.3871	26.518	26.7642	26.3705	0.321906	0.984023
1251	PAF1	Q8N7H5	RNA polymerase II-associated factor 1 homolog	10	43	26.3159	26.2095	26.5031	28.0332	28.0258	27.7871	1.60589	3.77415
1252	PAFAH1B3	Q15102	Platelet-activating factor acetylhydrolase IB subunit gamma	8	31	27.0385	27.5933	27.3365	27.1782	26.8085	26.5403	-0.480462	0.916922
1253	PAICS	P22234	Multifunctional protein ADE2;Phosphoribosylaminoimidazole-succinocarboxamide synthase;Phosphoribosylaminoimidazole carboxylase	20	197	30.0673	30.7968	30.6656	31.2875	31.2951	31.1801	0.744353	1.5119
1254	PAK2	Q13177	Serine/threonine-protein kinase PAK 2;PAK-2p27;PAK-2p34	10	57	22.8943	23.7437	25.9342	28.3323	28.3445	28.3482	4.1509	1.9933
1255	PAK4	O96013	Serine/threonine-protein kinase PAK 4	21	133	28.7205	28.7145	28.8913	29.4341	29.3398	29.4871	0.644891	3.06097
1256	PALD1	Q9ULE6	Paladin	2	10	25.4658	25.609	25.6327	25.4428	25.296	24.2854	-0.561096	0.695597
1257	PALLD	Q8WX93	Palladin	11	35	26.2587	26.3511	26.8143	27.1794	27.0807	27.4356	0.757168	1.70081
1258	PAM16	Q9Y3D7	Mitochondrial import inner membrane translocase subunit TIM16	5	36	27.621	27.7645	27.9431	26.5681	26.4822	26.1683	-1.36999	3.06424
1259	PANK4	Q9NVE7	Pantothenate kinase 4	5	16	25.219	25.6268	25.3865	23.9056	25.4232	25.5463	-0.452384	0.346938
1260	PAPOLA	P51003	Poly(A) polymerase alpha	10	62	26.8924	27.5694	26.7547	28.0736	28.025	28.126	1.00273	1.77639
1261	PAPSS1	O43252	Bifunctional 3-phosphoadenosine 5-phosphosulfate synthase 1;Sulfate adenylyltransferase;Adenylyl-sulfate kinase	9	34	26.8676	27.8513	26.9952	26.5787	26.9666	26.6244	-0.514794	0.707355
1262	PAPSS2	O95340	Bifunctional 3-phosphoadenosine 5-phosphosulfate synthase 2;Sulfate adenylyltransferase;Adenylyl-sulfate kinase	7	25	26.7724	27.6094	27.322	26.6424	26.9311	26.8703	-0.420005	0.738529
1263	PARD3	Q8TEW0	Partitioning defective 3 homolog	9	29	26.5328	25.1432	25.055	26.9237	27.1292	27.2636	1.5285	1.45274
1264	PARK7	Q99497	Protein deglycase DJ-1	10	99	28.2584	28.3013	28.7889	27.8763	28.1542	27.8843	-0.477989	1.16402
1265	PARP1	P09874	Poly [ADP-ribose] polymerase 1	59	418	33.6445	31.0972	30.6262	30.7764	30.9546	30.9279	-0.90302	0.40811
1266	PATL1	Q86TB9	Protein PAT1 homolog 1	5	26	23.3344	24.5133	23.3476	26.9793	26.7428	27.1096	3.21212	2.86278
1267	PAXBP1	Q9Y5B6	PAX3- and PAX7-binding protein 1	7	37	23.7886	23.8494	25.0146	27.9225	27.8686	27.9912	3.70988	3.12181
1268	PC	P11498	Pyruvate carboxylase, mitochondrial	126	3081	37.7894	38.1028	38.2348	34.7213	34.804	34.7345	-3.28906	4.77931
1269	PCBP1	Q15365	Poly(rC)-binding protein 1	25	524	32.459	32.3774	32.5899	32.4329	32.4857	32.4721	-0.0118764	0.0647238
1270	PCBP2	Q15366	Poly(rC)-binding protein 2	20	317	32.0246	32.1817	31.9495	31.1918	31.6107	31.2576	-0.698554	2.04839
1271	PCCA	P05165	Propionyl-CoA carboxylase alpha chain, mitochondrial	81	1659	36.6198	36.9746	37.0079	33.2169	33.4923	33.3661	-3.509	4.73274
1272	PCCB	P05166	Propionyl-CoA carboxylase beta chain, mitochondrial	24	151	30.7992	31.1255	31.0826	24.8076	25.6187	24.7233	-5.95259	4.40103
1273	PCF11	O94913	Pre-mRNA cleavage complex 2 protein Pcf11	5	11	23.399	24.0963	24.7055	25.8632	25.9285	26.1088	1.89992	2.10731
1274	PCK2	Q16822	Phosphoenolpyruvate carboxykinase [GTP], mitochondrial	5	32	27.0764	26.2457	26.9929	25.8179	25.8939	25.6626	-0.98023	1.64067
1275	PCM1	Q15154	Pericentriolar material 1 protein	52	391	25.7347	24.7971	25.2653	31.8499	31.6604	31.8098	6.50766	4.71246
1276	PCNA	P12004	Proliferating cell nuclear antigen	24	365	31.9735	32.2775	32.1953	31.2836	31.4914	31.3035	-0.789301	2.66503
1277	PCNP	Q8WW12	PEST proteolytic signal-containing nuclear protein	13	102	23.6573	23.3674	24.1501	30.3687	30.066	30.2731	6.51098	4.92157
1278	PCNT	O95613	Pericentrin	5	13	24.1545	23.6765	23.9914	25.8685	26.0567	25.7281	1.94363	3.48111
1279	PDAP1	Q13442	28 kDa heat- and acid-stable phosphoprotein	21	252	23.5779	23.5858	24.345	31.1124	31.5935	31.8152	7.67083	4.70173
1280	PDCD11	Q14690	Protein RRP5 homolog	22	61	29.3869	27.713	27.5896	27.15	27.0811	26.855	-1.20117	0.958971
1281	PDCD2	Q16342	Programmed cell death protein 2	3	23	26.7334	26.7816	26.8791	26.1814	26.156	25.8337	-0.740975	2.45873
1282	PDCD2L	Q9BRP1	Programmed cell death protein 2-like	2	11	23.1983	23.7017	24.4925	25.4542	25.598	25.7345	1.79805	2.02046
1283	PDCD5	O14737	Programmed cell death protein 5	6	30	24.0289	23.5708	25.6244	27.7966	27.8096	27.7812	3.38776	2.25703
1284	PDCD6	O75340	Programmed cell death protein 6	4	7	25.8002	25.4712	24.9554	25.0676	24.4873	24.4308	-0.747039	1.10066
1285	PDCD6IP	Q8WUM4	Programmed cell death 6-interacting protein	19	123	28.4051	29.0181	29.2048	28.9287	28.994	28.8897	0.0614802	0.0898722
1286	PDE12	Q6L8Q7	2,5-phosphodiesterase 12	10	51	27.6008	28.1895	28.0596	27.5067	27.6399	27.3196	-0.461236	1.07721
1287	PDHA1	P08559	Pyruvate dehydrogenase E1 component subunit alpha, somatic form, mitochondrial	10	51	28.1209	28.4311	28.5119	27.739	27.9405	27.8764	-0.50268	1.70939
1288	PDHB	P11177	Pyruvate dehydrogenase E1 component subunit beta, mitochondrial	17	140	29.2195	29.7536	29.5092	28.6809	28.6868	28.5444	-0.856747	2.21965
1289	PDIA3	P30101	Protein disulfide-isomerase A3	11	57	27.8003	26.8832	27.4436	27.2992	27.3685	27.3357	-0.0412502	0.0530631
1290	PDIA6	Q15084	Protein disulfide-isomerase A6	12	194	30.5585	30.7415	30.9076	30.654	30.5559	30.5308	-0.155607	0.654201
1291	PDLIM1	O00151	PDZ and LIM domain protein 1	10	111	26.6172	24.3806	25.8255	31.1682	30.9129	31.0787	5.44552	2.93163
1292	PDLIM3	Q53GG5	PDZ and LIM domain protein 3	2	21	23.8719	23.16	23.5445	26.2151	26.2326	26.4507	2.77397	3.64835
1293	PDLIM5	Q96HC4	PDZ and LIM domain protein 5	25	302	29.6708	29.7846	29.9246	31.1567	31.2651	31.1484	1.39669	4.14694
1294	PDLIM7	Q9NR12	PDZ and LIM domain protein 7	9	53	27.3584	27.0556	27.5473	28.1074	27.8166	28.1288	0.69717	1.78594
1295	PDPK2P;PDPK1	Q6A1A2;O15530	Putative 3-phosphoinositide-dependent protein kinase 2;3-phosphoinositide-dependent protein kinase 1	2	19	24.175	22.7248	24.4027	26.5563	26.1311	26.2416	2.54218	2.03167
1296	PDRG1	Q9NUG6	p53 and DNA damage-regulated protein 1	4	13	24.9143	23.3224	24.9247	25.778	26.0348	25.8802	1.51052	1.31586
1297	PDS5A	Q29RF7	Sister chromatid cohesion protein PDS5 homolog A	10	49	26.5701	26.4762	26.6457	27.3487	27.4869	27.4547	0.866126	3.75228
1298	PDS5B	Q9NTI5	Sister chromatid cohesion protein PDS5 homolog B	3	28	25.7133	26.1938	25.9355	26.8293	26.4816	26.6453	0.704549	1.83229
1299	PDXDC1	Q6P996	Pyridoxal-dependent decarboxylase domain-containing protein 1	11	83	27.8407	28.1941	27.8633	27.9311	28.2142	28.1645	0.137253	0.40475
1300	PDXP	Q96GD0	Pyridoxal phosphate phosphatase	10	38	27.8856	28.0217	27.6798	26.8292	26.5692	26.7288	-1.15332	3.11626
1301	PEG10	Q86TG7	Retrotransposon-derived protein PEG10	5	33	27.6719	27.8143	27.9105	27.9841	27.9907	27.9252	0.167763	1.08981
1302	PELO	Q9BRX2	Protein pelota homolog	5	13	23.6191	25.3733	25.3846	25.2152	25.4823	25.3313	0.550604	0.392794
1303	PES1	O00541	Pescadillo homolog	17	129	29.1929	27.9116	28.0549	28.9204	28.9668	29.1058	0.611198	0.678772
1304	PEX14	O75381	Peroxisomal membrane protein PEX14	6	39	24.5197	24.926	24.3775	28.5184	28.8769	28.7201	4.09738	4.52394
1305	PEX5	P50542	Peroxisomal targeting signal 1 receptor	10	37	24.1665	23.5258	23.583	28.2314	28.505	28.3591	4.60672	4.51673
1306	PFAS	O15067	Phosphoribosylformylglycinamidine synthase	57	627	31.985	32.2725	32.4436	31.5681	31.5861	31.5917	-0.651718	2.08328
1307	PFDN2	Q9UHV9	Prefoldin subunit 2	9	62	24.4951	24.3375	24.7903	29.3761	28.689	28.9217	4.45459	4.29391
1308	PFDN6	O15212	Prefoldin subunit 6	9	57	22.9979	25.4757	25.6744	28.4004	28.344	28.279	3.62511	1.86589
1309	PFKL	P17858	ATP-dependent 6-phosphofructokinase, liver type	18	137	29.5018	29.8759	29.7605	29.6219	29.6444	29.5282	-0.114567	0.420393
1310	PFKM	P08237	ATP-dependent 6-phosphofructokinase, muscle type	15	48	27.3645	27.5884	27.8244	27.0975	27.2103	27.432	-0.345882	0.98147
1311	PFKP	Q01813	ATP-dependent 6-phosphofructokinase, platelet type	38	313	30.8775	31.1459	31.1898	30.5672	30.686	30.5356	-0.474813	1.93299
1312	PFN1	P07737	Profilin-1	23	530	33.3351	33.6884	33.4942	32.4068	32.5544	32.4381	-1.0395	3.13125
1313	PGAM1;PGAM2;PGAM4	P18669;P15259;Q8N0Y7	Phosphoglycerate mutase 1;Phosphoglycerate mutase 2;Probable phosphoglycerate mutase 4	8	50	27.1901	23.2239	27.1021	27.9654	28.0351	28.1373	2.20726	0.777454
1314	PGAM5	Q96HS1	Serine/threonine-protein phosphatase PGAM5, mitochondrial	16	83	28.8407	28.5496	28.4863	28.6503	28.7204	28.4552	-0.0168819	0.04265
1315	PGD	P52209	6-phosphogluconate dehydrogenase, decarboxylating	25	220	31.1216	31.5706	31.641	30.8877	31.072	30.8447	-0.509632	1.34638
1316	PGK1	P00558	Phosphoglycerate kinase 1	41	778	32.6867	33.0255	33.0828	32.2942	32.5314	32.2809	-0.562866	1.72039
1317	PGLS	O95336	6-phosphogluconolactonase	15	137	29.408	30.1972	29.7154	28.5899	29.2266	28.9207	-0.861156	1.36721
1318	PGM1	P36871	Phosphoglucomutase-1	5	22	26.1962	26.5338	26.8863	26.4082	26.7307	27.0874	0.203318	0.294661
1319	PGM3	O95394	Phosphoacetylglucosamine mutase	11	60	28.0447	28.1949	28.4763	27.741	27.5905	27.5851	-0.599798	1.9312
1320	PGP	A6NDG6	Phosphoglycolate phosphatase	9	37	27.6853	28.1898	28.4037	27.2715	27.1269	27.6292	-0.750387	1.34896
1321	PGRMC1	O00264	Membrane-associated progesterone receptor component 1	6	10	26.3593	25.5049	25.8539	25.9989	26.8461	26.0061	0.37768	0.430845
1322	PGRMC2	O15173	Membrane-associated progesterone receptor component 2	3	24	24.426	23.6136	24.1504	26.733	26.5534	26.7779	2.62476	3.34433
1323	PHACTR4	Q8IZ21	Phosphatase and actin regulator 4	8	42	24.3685	24.3614	24.105	27.4326	27.5469	27.5193	3.22134	5.37798
1324	PHAX	Q9H814	Phosphorylated adapter RNA export protein	7	33	24.2855	23.955	24.4786	27.6339	27.8407	27.7421	3.49919	4.54347
1325	PHB	P35232	Prohibitin	22	162	29.7221	29.8613	29.8536	28.4407	28.6626	28.4107	-1.3077	3.85855
1326	PHB2	Q99623	Prohibitin-2	18	113	28.9903	28.9532	29.1162	28.43	28.6642	28.4635	-0.500686	2.32281
1327	PHC1	P78364	Polyhomeotic-like protein 1	2	10	23.4804	24.7971	24.1711	23.5826	23.5212	24.1395	-0.40177	0.396707
1328	PHF3	Q92576	PHD finger protein 3	15	63	24.1796	22.7427	23.0474	27.3684	28.6927	28.6841	4.9251	2.86586
1329	PHF5A	Q7RTV0	PHD finger-like domain-containing protein 5A	5	42	27.1482	27.5132	27.3864	26.9665	26.6051	26.6974	-0.592939	1.75327
1330	PHF6	Q8IWS0	PHD finger protein 6	5	31	26.2643	26.3547	26.2721	25.82	26.1064	25.8804	-0.361461	1.769
1331	PHF8	Q9UPP1	Histone lysine demethylase PHF8	4	12	25.75	25.5032	25.5339	26.745	26.0582	25.9887	0.668243	1.23783
1332	PHGDH	O43175	D-3-phosphoglycerate dehydrogenase	34	589	32.3687	32.7501	32.763	32.1674	32.2526	32.1285	-0.444429	1.52644
1333	PHIP	Q8WWQ0	PH-interacting protein	13	19	30.5881	24.165	23.1394	25.9232	25.5538	28.0483	0.544289	0.0780356
1334	PHPT1	Q9NRX4	14 kDa phosphohistidine phosphatase	3	42	26.4627	26.2918	26.956	26.9398	26.9586	27.004	0.39728	0.928098
1335	PI4KB	Q9UBF8	Phosphatidylinositol 4-kinase beta	2	18	22.8733	22.3892	24.7589	25.1348	25.1715	25.6087	1.96457	1.24857
1336	PIH1D1	Q9NWS0	PIH1 domain-containing protein 1	8	67	25.3539	24.3075	25.3992	28.9324	28.9995	29.0746	3.98194	3.42524
1337	PIN1	Q13526	Peptidyl-prolyl cis-trans isomerase NIMA-interacting 1	11	121	28.9839	29.1512	29.295	28.9476	28.8631	28.8094	-0.270007	1.28572
1338	PIP4K2A	P48426	Phosphatidylinositol 5-phosphate 4-kinase type-2 alpha	4	15	23.946	23.8103	23.8491	24.8572	25.109	24.7409	1.03393	3.0594
1339	PITRM1	Q5JRX3	Presequence protease, mitochondrial	14	69	27.6248	28.0247	27.7818	27.6165	27.2703	27.3905	-0.384708	1.17176
1340	PKM	P14618	Pyruvate kinase PKM	61	1511	35.4721	35.7519	35.7924	34.9198	35.093	35.0092	-0.664814	2.38762
1341	PKN1	Q16512	Serine/threonine-protein kinase N1	11	50	27.29	27.4077	27.2965	27.4565	27.1638	27.6267	0.0842787	0.235944
1342	PKN2	Q16513	Serine/threonine-protein kinase N2	16	127	28.2534	28.2863	28.3249	28.2986	28.4447	28.3652	0.0813046	0.799356
1343	PKP2	Q99959	Plakophilin-2	5	17	26.4058	26.1835	26.5639	24.1789	22.7759	24.5161	-2.56076	2.03309
1344	PLAA	Q9Y263	Phospholipase A-2-activating protein	3	16	25.5295	25.8391	25.6281	23.8755	23.0148	25.3007	-1.60192	1.11971
1345	PLCG1	P19174	1-phosphatidylinositol 4,5-bisphosphate phosphodiesterase gamma-1	6	30	25.5741	26.0274	25.7663	26.0846	26.1008	26.1743	0.330598	1.15822
1346	PLEKHA1	Q9HB21	Pleckstrin homology domain-containing family A member 1	5	22	22.9279	22.7126	22.8359	27.288	27.1193	27.1594	4.36344	6.15959
1347	PLEKHA5	Q9HAU0	Pleckstrin homology domain-containing family A member 5	13	82	23.2436	24.079	23.3419	28.5605	28.5639	28.4882	4.98268	4.32836
1348	PLIN3	O60664	Perilipin-3	6	24	23.7313	24.0127	24.3057	27.0207	27.1802	27.2535	3.1349	4.19988
1349	PLK1	P53350	Serine/threonine-protein kinase PLK1	6	22	26.9037	26.8845	27.0124	26.4585	26.5948	26.4198	-0.442516	2.58057
1350	PLRG1	O43660	Pleiotropic regulator 1	4	18	25.0041	25.1826	25.2689	26.4062	26.1796	26.0685	1.06624	2.96724
1351	PLS3	P13797	Plastin-3	5	33	25.779	24.3055	25.967	26.6096	26.663	26.2358	1.15233	0.996747
1352	PML	P29590	Protein PML	5	28	22.7837	24.3665	24.7776	26.9417	26.6603	26.6975	2.79057	1.98011
1353	PMM2	O15305	Phosphomannomutase 2	5	25	26.5192	26.5911	28.3801	27.1319	27.0776	27.0578	-0.0743484	0.0415642
1354	PMPCA	Q10713	Mitochondrial-processing peptidase subunit alpha	10	53	27.6642	27.8764	27.9916	27.8258	27.888	27.8126	-0.0019474	0.00647595
1355	PMPCB	O75439	Mitochondrial-processing peptidase subunit beta	15	125	29.736	29.7332	29.7135	28.5538	28.8905	28.7276	-1.00364	3.29946
1356	PNISR	Q8TF01	Arginine/serine-rich protein PNISR	12	51	23.6402	24.5082	23.2531	28.83	28.5341	28.7444	4.90236	3.67549
1357	PNN	Q9H307	Pinin	22	154	29.8417	29.0027	28.8019	30.2515	30.0933	30.111	0.936469	1.35762
1358	PNP	P00491	Purine nucleoside phosphorylase	4	19	25.4732	25.3163	25.4289	25.96	26.049	26.0785	0.623065	3.34988
1359	POGZ	Q7Z3K3	Pogo transposable element with ZNF domain	9	37	26.9729	26.9238	26.8959	27.0877	27.2083	27.2084	0.237321	2.1703
1360	POLA1	P09884	DNA polymerase alpha catalytic subunit	14	36	26.8779	27.3319	27.3678	27.8028	28.0551	28.0156	0.765294	1.9142
1361	POLD1	P28340	DNA polymerase delta catalytic subunit	14	39	27.9358	28.3362	28.234	27.3725	27.5155	27.3874	-0.743546	2.35485
1362	POLD2	P49005	DNA polymerase delta subunit 2	6	21	26.9435	27.6754	27.5016	24.1436	26.7218	26.4901	-1.58832	0.866651
1363	POLD3	Q15054	DNA polymerase delta subunit 3	3	12	25.1426	25.5113	25.4254	25.3886	25.4385	25.4777	0.0751851	0.262276
1364	POLDIP3	Q9BY77	Polymerase delta-interacting protein 3	13	85	28.5835	28.0351	28.0543	28.445	28.1704	28.6078	0.183421	0.344798
1365	POLR1A	O95602	DNA-directed RNA polymerase I subunit RPA1	9	31	26.5102	26.9185	26.9734	26.9398	26.7715	26.9807	0.0965811	0.238409
1366	POLR1B	Q9H9Y6	DNA-directed RNA polymerase I subunit RPA2	2	10	24.4135	24.5906	24.7325	24.964	24.9706	25.3285	0.508827	1.54592
1367	POLR1C	O15160	DNA-directed RNA polymerases I and III subunit RPAC1	13	89	28.2087	28.5178	28.2555	28.1438	28.3891	28.1788	-0.0900548	0.297094
1368	POLR1D	Q9Y2S0	DNA-directed RNA polymerases I and III subunit RPAC2	4	14	23.9903	26.1498	24.0114	26.3076	26.1199	26.0714	1.44913	0.941451
1369	POLR2A	P24928	DNA-directed RNA polymerase II subunit RPB1	16	69	27.6722	27.9208	28.0719	28.2104	27.8823	28.1492	0.19232	0.553002
1370	POLR2B	P30876	DNA-directed RNA polymerase II subunit RPB2	21	170	28.6542	29.1281	29.154	28.8213	28.8291	28.8711	-0.138282	0.352082
1371	POLR2C	P19387	DNA-directed RNA polymerase II subunit RPB3	8	32	26.926	26.855	27.4847	26.5371	24.6864	23.4489	-2.19776	1.12445
1372	POLR2E	P19388	DNA-directed RNA polymerases I, II, and III subunit RPABC1	6	43	26.1848	26.0565	26.5529	27.6119	27.4864	27.6242	1.30942	2.96665
1373	POLR2I	P36954	DNA-directed RNA polymerase II subunit RPB9	3	35	25.705	26.0646	25.7815	24.7203	24.7897	24.8238	-1.07239	3.15453
1374	POLR3A	O14802	DNA-directed RNA polymerase III subunit RPC1	7	28	26.2862	26.7031	26.6606	26.3368	26.4461	26.5511	-0.105286	0.291431
1375	POLR3D	P05423	DNA-directed RNA polymerase III subunit RPC4	5	10	24.2779	25.3163	24.2764	25.0594	24.9348	25.4364	0.519976	0.618477
1376	POLR3E	Q9NVU0	DNA-directed RNA polymerase III subunit RPC5	3	12	26.1073	26.1968	26.2179	26.6955	26.6228	26.7452	0.513881	3.32663
1377	POM121C;POM121	A8CG34;Q96HA1	Nuclear envelope pore membrane protein POM 121C;Nuclear envelope pore membrane protein POM 121	5	12	25.6784	25.658	25.5748	26.3842	26.028	26.4288	0.643252	2.10078
1378	POP1	Q99575	Ribonucleases P/MRP protein subunit POP1	8	15	25.3721	23.1817	26.8135	26.5113	26.4222	26.5988	1.38832	0.58616
1379	POP7	O75817	Ribonuclease P protein subunit p20	2	18	25.8845	23.8527	24.8514	26.3578	25.7308	26.5482	1.3494	0.994366
1380	PPA1	Q15181	Inorganic pyrophosphatase	5	40	26.5909	26.0799	26.4777	27.3675	27.4572	27.1693	0.948486	2.23493
1381	PPAN	Q9NQ55	Suppressor of SWI4 1 homolog	5	19	27.2016	25.7923	25.247	26.1204	26.2497	25.9992	0.0427945	0.0244005
1382	PPFIA1	Q13136	Liprin-alpha-1	10	18	25.8479	24.6512	26.1145	26.8956	27.7081	27.0307	1.67359	1.50217
1383	PPHLN1	Q8NEY8	Periphilin-1	3	10	24.4268	24.2372	23.655	24.96	24.9441	25.0232	0.869436	1.69048
1384	PPIA	P62937	Peptidyl-prolyl cis-trans isomerase A;Peptidyl-prolyl cis-trans isomerase A, N-terminally processed	17	604	33.6849	33.9009	33.87	33.4963	33.5512	33.545	-0.287752	1.83947
1385	PPID	Q08752	Peptidyl-prolyl cis-trans isomerase D	3	29	23.6688	26.0572	27.1388	25.7174	25.4352	25.4679	-0.0814095	0.0265309
1386	PPIE	Q9UNP9	Peptidyl-prolyl cis-trans isomerase E	4	13	25.6826	25.53	22.3915	26.5204	26.7429	26.5921	2.08374	0.904865
1387	PPIG	Q13427	Peptidyl-prolyl cis-trans isomerase G	3	20	26.4536	26.4111	26.0688	24.0036	24.196	23.8902	-2.28124	3.95129
1388	PPIH	O43447	Peptidyl-prolyl cis-trans isomerase H	8	50	27.31	27.6031	27.6387	26.8603	27.1661	27.0861	-0.479732	1.58792
1389	PPIL1	Q9Y3C6	Peptidyl-prolyl cis-trans isomerase-like 1	2	17	23.8173	24.8809	24.6201	27.0046	27.0727	26.0276	2.26221	2.083
1390	PPIL2	Q13356	Peptidyl-prolyl cis-trans isomerase-like 2	4	16	26.4014	26.3296	26.7196	26.7103	26.4442	26.4833	0.0624008	0.160789
1391	PPIL3	Q9H2H8	Peptidyl-prolyl cis-trans isomerase-like 3	2	18	25.2706	23.965	25.6672	24.9425	25.1462	24.9678	0.0512282	0.0333867
1392	PPIL4	Q8WUA2	Peptidyl-prolyl cis-trans isomerase-like 4	10	71	27.5745	27.8043	27.7218	29.0868	28.9863	28.951	1.3078	4.11703
1393	PPM1F	P49593	Protein phosphatase 1F	9	49	26.683	26.7272	27.0497	27.1723	27.2068	27.1728	0.364017	1.45546
1394	PPM1G	O15355	Protein phosphatase 1G	16	157	28.2321	28.385	28.4495	29.477	29.4622	29.4985	1.12371	4.17365
1395	PPM1H	Q9ULR3	Protein phosphatase 1H	2	13	24.3325	23.7726	24.8354	29.5691	29.4799	29.4062	5.17153	4.11821
1396	PPME1	Q9Y570	Protein phosphatase methylesterase 1	7	20	25.9214	26.4938	26.3294	27.1358	26.1454	26.4521	0.329568	0.413961
1397	PPP1CA	P62136	Serine/threonine-protein phosphatase PP1-alpha catalytic subunit	15	92	28.9352	29.2502	29.0703	28.797	28.9456	28.974	-0.179662	0.77776
1398	PPP1CB	P62140	Serine/threonine-protein phosphatase PP1-beta catalytic subunit	12	37	27.6679	28.2177	27.967	27.3254	27.5231	27.2698	-0.578088	1.51351
1399	PPP1CC	P36873	Serine/threonine-protein phosphatase PP1-gamma catalytic subunit	13	27	29.2258	29.6794	29.1524	28.1585	28.7293	28.4357	-0.911413	1.75973
1400	PPP1R10	Q96QC0	Serine/threonine-protein phosphatase 1 regulatory subunit 10	36	336	23.6572	26.4132	24.37	32.1218	32.119	32.1071	7.30249	3.0441
1401	PPP1R12A	O14974	Protein phosphatase 1 regulatory subunit 12A	17	66	25.2541	25.965	25.3592	29.3729	29.0109	29.0157	3.60704	3.85959
1402	PPP1R2;PPP1R2P3	P41236;Q6NXS1	Protein phosphatase inhibitor 2;Protein phosphatase inhibitor 2-like protein 3	6	35	24.4474	23.845	24.2332	26.9278	26.847	26.9016	2.71695	3.96982
1403	PPP1R8	Q12972	Nuclear inhibitor of protein phosphatase 1;Activator of RNA decay	5	36	27.3782	27.1396	27.4615	28.2649	27.9768	28.4313	0.897952	2.26532
1404	PPP2R1A	P30153	Serine/threonine-protein phosphatase 2A 65 kDa regulatory subunit A alpha isoform	20	151	29.5338	29.8945	29.932	29.2859	29.3264	29.1926	-0.51852	1.7556
1405	PPP2R5D	Q14738	Serine/threonine-protein phosphatase 2A 56 kDa regulatory subunit delta isoform	4	19	25.335	22.7058	25.5243	26.1618	26.4781	25.939	1.67128	0.840411
1406	PPP4C	P60510	Serine/threonine-protein phosphatase 4 catalytic subunit	2	29	27.0915	27.1141	27.9263	26.5892	26.7396	27.1235	-0.559893	0.816925
1407	PPP4R1	Q8TF05	Serine/threonine-protein phosphatase 4 regulatory subunit 1	3	11	23.8489	24.3338	24.4534	24.1335	24.6178	23.6511	-0.0779076	0.0822983
1408	PPP6R1	Q9UPN7	Serine/threonine-protein phosphatase 6 regulatory subunit 1	4	51	26.0958	26.237	26.441	27.4134	27.281	27.3881	1.10291	3.28388
1409	PRCC	Q92733	Proline-rich protein PRCC	4	23	24.6127	24.3594	24.5719	26.5125	26.8045	27.2769	2.34997	3.24193
1410	PRDX1	Q06830	Peroxiredoxin-1	14	124	30.5226	30.6282	30.7957	30.6036	30.5686	30.4354	-0.112967	0.525327
1411	PRDX2	P32119	Peroxiredoxin-2	12	91	28.164	28.3864	28.2621	27.2343	27.3966	27.1254	-1.0187	3.25294
1412	PRDX3	P30048	Thioredoxin-dependent peroxide reductase, mitochondrial	5	21	26.6232	26.6534	26.8097	25.4032	25.5647	25.4111	-1.23576	4.03017
1413	PRDX6	P30041	Peroxiredoxin-6	4	22	26.4379	26.2127	26.998	26.0371	26.4759	26.2924	-0.281097	0.455928
1414	PREB	Q9HCU5	Prolactin regulatory element-binding protein	4	10	24.7327	24.8446	25.0819	25.0615	24.984	25.185	0.190448	0.73741
1415	PRIM2	P49643	DNA primase large subunit	2	15	25.3595	26.2404	25.9286	24.6569	25.1035	24.8665	-0.967257	1.5459
1416	PRKAA1;PRKAA2	Q13131;P54646	5-AMP-activated protein kinase catalytic subunit alpha-1;5-AMP-activated protein kinase catalytic subunit alpha-2	4	17	24.8623	23.7642	25.4652	25.5737	25.3666	25.3348	0.727821	0.653909
1417	PRKAR1A	P10644	cAMP-dependent protein kinase type I-alpha regulatory subunit;cAMP-dependent protein kinase type I-alpha regulatory subunit, N-terminally processed	5	43	26.8831	27.1868	27.1138	25.9468	26.2254	26.1672	-0.948056	2.79284
1418	PRKAR2A	P13861	cAMP-dependent protein kinase type II-alpha regulatory subunit	12	57	27.2634	27.6967	27.3128	27.8299	28.017	27.7153	0.429764	1.24004
1419	PRKAR2B	P31323	cAMP-dependent protein kinase type II-beta regulatory subunit	4	24	23.79	22.9223	22.4221	24.2079	24.2389	24.2862	1.19956	1.39734
1420	PRKDC	P78527	DNA-dependent protein kinase catalytic subunit	71	468	30.7076	31.1215	30.9532	30.531	30.6284	30.5602	-0.354214	1.34068
1421	PRKRA	O75569	Interferon-inducible double-stranded RNA-dependent protein kinase activator A	7	29	26.3857	26.5152	26.3959	25.7177	26.1211	26.0852	-0.457595	1.55585
1422	PRMT5	O14744	Protein arginine N-methyltransferase 5;Protein arginine N-methyltransferase 5, N-terminally processed	14	138	28.1034	28.5043	28.3827	29.6582	29.4354	29.4962	1.19976	3.04001
1423	PRMT7	Q9NVM4	Protein arginine N-methyltransferase 7	8	30	23.5637	23.1701	23.5632	27.9175	27.9048	27.784	4.43644	5.25536
1424	PRPF19	Q9UMS4	Pre-mRNA-processing factor 19	16	203	30.068	29.8329	30.0221	29.9272	29.9296	29.7643	-0.100651	0.484239
1425	PRPF3	O43395	U4/U6 small nuclear ribonucleoprotein Prp3	22	186	28.5841	28.6712	28.7857	29.9582	29.8002	30.0093	1.24223	3.87736
1426	PRPF31	Q8WWY3	U4/U6 small nuclear ribonucleoprotein Prp31	10	54	27.2605	27.2759	27.4002	27.4069	27.6002	27.7526	0.274344	1.17936
1427	PRPF38A	Q8NAV1	Pre-mRNA-splicing factor 38A	2	20	25.9951	26.116	23.4259	26.8606	26.8088	26.4158	1.51611	0.787539
1428	PRPF4	O43172	U4/U6 small nuclear ribonucleoprotein Prp4	13	66	27.8428	28.2445	28.3345	28.3501	28.2732	28.1537	0.118447	0.297425
1429	PRPF40A	O75400	Pre-mRNA-processing factor 40 homolog A	6	15	24.0316	23.4777	26.353	26.6807	27.0658	26.8898	2.25803	1.19556
1430	PRPF4B	Q13523	Serine/threonine-protein kinase PRP4 homolog	7	42	27.5563	27.1361	27.4896	28.0131	28.1191	28.4062	0.785452	1.9579
1431	PRPF6	O94906	Pre-mRNA-processing factor 6	21	98	28.7054	28.7461	29.1039	29.2202	29.2552	29.2445	0.388162	1.42217
1432	PRPF8	Q6P2Q9	Pre-mRNA-processing-splicing factor 8	44	266	29.8669	29.4816	29.7475	30.2797	30.3092	30.3308	0.607939	2.21409
1433	PRPS1	P60891	Ribose-phosphate pyrophosphokinase 1	16	182	30.0005	30.2335	30.2366	28.8976	29.2012	28.9527	-1.13971	3.13883
1434	PRPS2	P11908	Ribose-phosphate pyrophosphokinase 2	11	32	26.5708	26.3998	26.7179	26.0266	26.5197	26.3105	-0.277231	0.749447
1435	PRPSAP2	O60256	Phosphoribosyl pyrophosphate synthase-associated protein 2	12	117	28.7295	29.0161	28.9523	28.5127	28.5677	28.5311	-0.362126	1.82765
1436	PRRC2A	P48634	Protein PRRC2A	60	512	26.654	26.3602	27.5755	32.8543	32.6828	32.8572	5.93487	4.0511
1437	PRRC2B	Q5JSZ5	Protein PRRC2B	35	143	24.5679	24.955	25.4259	30.179	30.0189	28.9186	4.72257	3.26758
1438	PRRC2C	Q9Y520	Protein PRRC2C	93	778	27.5535	27.6174	28.9882	33.5976	33.3531	33.5496	5.44702	3.48541
1439	PSIP1	O75475	PC4 and SFRS1-interacting protein	12	63	30.1633	26.3252	25.0341	27.7626	27.9159	27.6011	0.585702	0.140535
1440	PSMA1	P25786	Proteasome subunit alpha type-1	5	67	27.6289	27.1575	27.3608	27.4148	27.5071	27.5124	0.0956961	0.27395
1441	PSMA5	P28066	Proteasome subunit alpha type-5	1	11	22.9062	23.6798	25.8517	26.6761	26.5909	26.6305	2.4866	1.32001
1442	PSMA7;PSMA8	O14818;Q8TAA3	Proteasome subunit alpha type-7;Proteasome subunit alpha type-7-like	6	24	26.5812	26.9694	26.6691	26.1167	26.8912	26.5271	-0.228209	0.379278
1443	PSMC1	P62191	26S protease regulatory subunit 4	21	164	29.2121	29.686	29.6598	29.2658	29.6573	29.5481	-0.0289008	0.0514821
1444	PSMC2	P35998	26S protease regulatory subunit 7	25	301	30.4768	30.8778	30.908	30.5433	30.6089	30.5541	-0.185428	0.589701
1445	PSMC3	P17980	26S protease regulatory subunit 6A	20	217	29.5285	30.0278	29.6774	29.5049	29.7292	29.5752	-0.141433	0.364261
1446	PSMC4	P43686	26S protease regulatory subunit 6B	26	389	31.1187	31.2791	31.5009	31.1647	31.2891	31.1763	-0.0895125	0.310404
1447	PSMC5	P62195	26S protease regulatory subunit 8	30	293	30.498	30.8215	30.7904	30.7235	30.771	30.8315	0.0720488	0.267608
1448	PSMC6	P62333	26S protease regulatory subunit 10B	24	233	29.6648	30.0133	29.8798	29.5473	29.9699	29.7507	-0.096667	0.23997
1449	PSMD1	Q99460	26S proteasome non-ATPase regulatory subunit 1	10	41	27.0661	27.2255	27.4835	27.6052	27.7547	27.6174	0.40074	1.42648
1450	PSMD10	O75832	26S proteasome non-ATPase regulatory subunit 10	5	33	27.694	27.8209	28.3422	27.5513	27.8919	27.7441	-0.223251	0.431239
1451	PSMD11	O00231	26S proteasome non-ATPase regulatory subunit 11	9	68	28.0703	28.3026	28.3284	28.4169	28.3522	28.3212	0.129697	0.679267
1452	PSMD12	O00232	26S proteasome non-ATPase regulatory subunit 12	6	19	22.5133	23.8604	25.1963	25.7259	26.2816	25.9097	2.11572	1.2546
1453	PSMD14	O00487	26S proteasome non-ATPase regulatory subunit 14	2	11	25.209	24.8146	24.729	24.1065	24.7379	23.927	-0.660366	1.08207
1454	PSMD2	Q13200	26S proteasome non-ATPase regulatory subunit 2	9	71	27.9625	28.3946	28.5486	28.6078	28.589	28.5767	0.289255	0.756936
1455	PSMD3	O43242	26S proteasome non-ATPase regulatory subunit 3	16	51	27.6701	27.875	27.6477	27.152	27.6288	27.2611	-0.383582	1.11799
1456	PSMD4	P55036	26S proteasome non-ATPase regulatory subunit 4	14	107	28.5026	28.8847	28.7313	29.1231	29.2993	29.176	0.493212	1.79964
1457	PSMD7	P51665	26S proteasome non-ATPase regulatory subunit 7	6	38	25.6952	25.9611	26.3008	27.1385	27.2397	27.5039	1.30833	2.49903
1458	PSMD9	O00233	26S proteasome non-ATPase regulatory subunit 9	5	13	24.8567	25.4232	25.8771	25.5315	25.5026	26.0867	0.321283	0.385238
1459	PSME3	P61289	Proteasome activator complex subunit 3	10	52	26.0731	26.2254	26.7115	28.1564	29.3643	28.3719	2.29419	2.26709
1460	PSMF1	Q92530	Proteasome inhibitor PI31 subunit	2	34	26.9333	26.9574	27.2694	26.5929	26.3272	26.3387	-0.633734	1.98854
1461	PSMG1	O95456	Proteasome assembly chaperone 1	6	57	27.0802	27.4689	27.2636	27.0616	27.2605	27.3223	-0.0560659	0.152743
1462	PSPC1	Q8WXF1	Paraspeckle component 1	13	95	28.52	29.092	28.8037	28.0847	28.4647	28.2245	-0.547277	1.2897
1463	PTBP1	P26599	Polypyrimidine tract-binding protein 1	6	31	27.3173	27.0871	27.1979	27.1526	27.2602	27.1799	-0.00324059	0.0145159
1464	PTGES3	Q15185	Prostaglandin E synthase 3	11	142	30.2555	30.2242	30.6132	30.0926	29.9991	30.0503	-0.316985	1.1677
1465	PTK2	Q05397	Focal adhesion kinase 1	2	4	23.4589	25.2284	23.8207	23.7116	24.4248	24.3262	-0.0151342	0.00852215
1466	PTPN1	P18031	Tyrosine-protein phosphatase non-receptor type 1	3	16	26.3871	26.7184	26.4813	26.8188	26.9472	27.0917	0.423632	1.54677
1467	PTPN11	Q06124	Tyrosine-protein phosphatase non-receptor type 11	11	65	26.6517	26.6599	26.6951	28.5493	28.6999	28.5632	1.93521	5.57905
1468	PTPN13	Q12923	Tyrosine-protein phosphatase non-receptor type 13	16	55	23.6301	27.5299	26.4582	29.3055	30.4154	29.7867	3.9631	1.51735
1469	PTPN2	P17706	Tyrosine-protein phosphatase non-receptor type 2	2	18	24.8563	25.0738	24.3152	25.4977	24.9133	25.1929	0.452804	0.737064
1470	PUF60	Q9UHX1	Poly(U)-binding-splicing factor PUF60	10	99	27.8093	27.6093	28.0586	29.3859	29.4528	29.4362	1.59926	3.58105
1471	PUM1	Q14671	Pumilio homolog 1	10	46	27.5173	27.7516	27.8796	27.9009	27.8622	27.9724	0.195679	0.817171
1472	PUS1	Q9Y606	tRNA pseudouridine synthase A, mitochondrial	4	15	25.5702	26.5035	25.8171	25.9204	25.4795	25.7485	-0.24748	0.331832
1473	PUS7	Q96PZ0	Pseudouridylate synthase 7 homolog	5	17	23.581	23.9258	24.4125	27.1258	27.1561	27.1612	3.17459	3.71386
1474	PWP2	Q15269	Periodic tryptophan protein 2 homolog	7	20	27.0429	26.2921	26.2478	24.7127	25.6624	25.3916	-1.27202	1.53411
1475	PXN	P49023	Paxillin	4	23	22.7209	24.3039	24.9179	27.0631	26.6923	27.022	2.94491	1.94193
1476	PYCR1	P32322	Pyrroline-5-carboxylate reductase 1, mitochondrial	4	12	23.9014	25.8478	26.5714	25.7564	25.7916	25.6522	0.293168	0.135456
1477	PYCR2	Q96C36	Pyrroline-5-carboxylate reductase 2	10	98	28.5855	29.1163	28.8627	28.4815	28.4182	28.2979	-0.455581	1.31332
1478	PYCRL	Q53H96	Pyrroline-5-carboxylate reductase 3	4	19	25.9763	26.1469	26.5829	25.793	26.3459	25.9853	-0.193987	0.328988
1479	PYGL;PYGM	P06737;P11217	Glycogen phosphorylase, liver form;Glycogen phosphorylase, muscle form	6	15	26.32	26.4035	26.0526	25.5656	25.8681	25.8869	-0.485177	1.51077
1480	QARS	P47897	Glutamine--tRNA ligase	32	260	29.9567	30.2938	30.3014	30.3118	30.4809	30.3661	0.202281	0.74851
1481	QRICH1	Q2TAL8	Glutamine-rich protein 1	3	14	25.8738	26.0554	26.0709	25.804	25.7602	24.3191	-0.705591	0.648263
1482	QTRT1	Q9BXR0	Queuine tRNA-ribosyltransferase	3	11	24.9661	25.0228	25.3746	24.5965	24.0379	24.4701	-0.75303	1.62461
1483	QTRTD1	Q9H974	Queuine tRNA-ribosyltransferase subunit QTRTD1	3	12	26.1445	26.2627	26.5737	26.3822	26.3983	26.2884	0.0292753	0.07781
1484	R3HCC1L	Q7Z5L2	Coiled-coil domain-containing protein R3HCC1L	6	10	23.6161	24.6713	24.7678	26.5235	26.4658	26.6998	2.2113	2.38108
1485	RAB11FIP1	Q6WKZ4	Rab11 family-interacting protein 1	14	37	23.8919	24.0875	24.0042	30.9364	30.8681	30.8052	6.87534	7.23683
1486	RAB11FIP5	Q9BXF6	Rab11 family-interacting protein 5	9	31	23.9577	22.9135	24.8681	27.0232	26.9939	27.0614	3.11303	2.27619
1487	RAB21	Q9UL25	Ras-related protein Rab-21	6	86	27.9932	27.9577	28.184	27.9349	27.992	27.7979	-0.136712	0.684454
1488	RAB34	Q9BZG1	Ras-related protein Rab-34	2	8	25.3761	25.4276	25.6001	25.8477	25.5856	25.4712	0.166895	0.568811
1489	RAB3GAP2	Q9H2M9	Rab3 GTPase-activating protein non-catalytic subunit	4	25	25.8683	26.2475	25.6399	26.0834	26.4238	26.3079	0.353111	0.802419
1490	RAB7A	P51149	Ras-related protein Rab-7a	2	8	25.5564	26.091	26.0669	23.5935	24.389	24.5646	-1.72237	2.11915
1491	RABEP1	Q15276	Rab GTPase-binding effector protein 1	11	33	23.967	24.8802	23.6452	27.7044	27.5709	27.6842	3.48904	3.14173
1492	RABGGTB	P53611	Geranylgeranyl transferase type-2 subunit beta	4	10	25.0129	23.6636	25.3408	25.3896	25.5365	25.6496	0.852809	0.755752
1493	RABL6	Q3YEC7	Rab-like protein 6	15	88	24.1465	23.8617	23.8953	29.1565	29.0494	29.1527	5.15168	6.13329
1494	RACGAP1	Q9H0H5	Rac GTPase-activating protein 1	9	33	27.9453	26.7158	26.8508	27.1168	27.4122	27.2311	0.0827312	0.0727651
1495	RAD18	Q9NS91	E3 ubiquitin-protein ligase RAD18	7	34	23.6989	25.1974	23.8127	27.786	27.6848	27.7153	3.49236	2.71345
1496	RAD21	O60216	Double-strand-break repair protein rad21 homolog	6	25	25.4455	25.5532	25.5042	25.7652	26.4792	25.829	0.523465	1.06865
1497	RAD50	Q92878	DNA repair protein RAD50	22	107	28.884	28.8715	29.1389	29.0047	29.0312	28.9521	0.0311979	0.126756
1498	RAE1	P78406	mRNA export factor	8	35	27.668	27.7595	27.6826	27.3198	27.3133	26.9945	-0.494185	1.9492
1499	RAI14	Q9P0K7	Ankycorbin	12	43	24.5417	24.0744	24.4188	27.8463	28.0564	28.1572	3.67496	4.59633
1500	RALBP1	Q15311	RalA-binding protein 1	3	11	22.9424	24.5801	23.916	24.2378	24.2975	24.6347	0.577166	0.515257
1501	RALGAPB	Q86X10	Ral GTPase-activating protein subunit beta	6	30	25.3053	24.7888	26.483	26.5665	26.5616	26.6061	1.05234	0.983573
1502	RALY	Q9UKM9	RNA-binding protein Raly	8	36	28.1859	27.8944	27.7647	26.01	26.1303	26.3586	-1.78201	3.42022
1503	RAN	P62826	GTP-binding nuclear protein Ran	13	80	29.5083	29.2893	29.2183	29.7294	29.7302	29.6553	0.366329	1.80558
1504	RANBP1	P43487	Ran-specific GTPase-activating protein	11	172	30.901	30.8883	31.0999	30.9205	30.989	30.8079	-0.057284	0.264501
1505	RANBP10	Q6VN20	Ran-binding protein 10	2	12	23.9196	22.988	23.4631	25.2761	25.3934	25.5066	1.9351	2.65549
1506	RANBP2	P49792	E3 SUMO-protein ligase RanBP2	90	622	30.4172	30.7048	30.6857	31.8287	31.9902	31.9699	1.32705	3.63293
1507	RANBP3	Q9H6Z4	Ran-binding protein 3	5	78	24.6934	23.8236	22.694	29.9697	29.75	29.8304	6.113	3.3319
1508	RANGAP1	P46060	Ran GTPase-activating protein 1	30	315	29.2217	29.6462	29.6529	31.4854	31.6196	31.4639	2.01601	3.74338
1509	RAPGEF6	Q8TEU7	Rap guanine nucleotide exchange factor 6	5	18	24.8128	24.2853	24.8697	25.6762	25.5288	25.6368	0.958024	2.12878
1510	RAPH1	Q70E73	Ras-associated and pleckstrin homology domains-containing protein 1	5	32	24.8488	22.9145	24.0968	27.3604	27.2952	27.4872	3.42755	2.42619
1511	RARS	P54136	Arginine--tRNA ligase, cytoplasmic	26	245	29.7273	30.0752	30.0474	29.9354	29.9134	29.8764	-0.0415815	0.135866
1512	RASSF7	Q02833	Ras association domain-containing protein 7	2	4	24.1985	22.9372	23.3319	25.0456	24.9037	25.1379	1.53991	1.81627
1513	RAVER1	Q8IY67	Ribonucleoprotein PTB-binding 1	3	26	25.8399	25.6384	26.0336	25.2577	25.1843	25.4083	-0.553823	1.86446
1514	RB1	P06400	Retinoblastoma-associated protein	2	3	23.0624	24.7881	23.7269	24.1829	24.5991	24.41	0.538172	0.447978
1515	RBBP4	Q09028	Histone-binding protein RBBP4	17	145	30.2037	28.9185	29.2616	30.1706	30.2994	30.3484	0.811503	0.980657
1516	RBBP6	Q7Z6E9	E3 ubiquitin-protein ligase RBBP6	27	120	25.2731	24.2183	24.6509	29.9304	30.1176	30.1552	5.35364	4.15911
1517	RBBP7	Q16576	Histone-binding protein RBBP7	17	221	29.808	29.227	29.6089	31.0567	31.103	31.0859	1.53387	3.06814
1518	RBM10	P98175	RNA-binding protein 10	21	107	26.1723	25.4514	25.3477	29.6013	29.6852	29.8416	4.05226	3.94822
1519	RBM14	Q96PK6	RNA-binding protein 14	19	131	30.5521	30.1535	29.9979	29.2318	28.9559	29.1622	-1.11788	2.42525
1520	RBM15	Q96T37	Putative RNA-binding protein 15	12	33	28.1205	27.9552	27.9061	27.7014	27.6427	27.8144	-0.274435	1.54057
1521	RBM17	Q96I25	Splicing factor 45	17	117	27.1869	26.3745	27.0451	29.7484	30.014	30.2178	3.12455	3.40524
1522	RBM22	Q9NW64	Pre-mRNA-splicing factor RBM22	5	31	27.259	27.3255	27.1965	26.8631	26.8918	27.0247	-0.333766	2.23532
1523	RBM25	P49756	RNA-binding protein 25	11	53	26.5262	26.5214	26.8097	27.7721	27.6811	27.9435	1.17977	3.18763
1524	RBM26	Q5T8P6	RNA-binding protein 26	26	119	23.6315	24.4334	22.9692	30.6369	30.5124	30.5235	6.87955	4.06869
1525	RBM27	Q9P2N5	RNA-binding protein 27	15	86	24.1053	24.7362	28.6326	29.9466	29.5621	29.4837	3.83941	1.26606
1526	RBM28	Q9NW13	RNA-binding protein 28	13	17	27.9861	25.6723	25.4214	24.5142	23.9557	24.2902	-2.10656	1.18985
1527	RBM3	P98179	RNA-binding protein 3	7	31	29.2985	27.004	26.9841	26.9958	26.6732	26.8925	-0.90838	0.514736
1528	RBM33	Q96EV2	RNA-binding protein 33	12	86	24.6734	25.2311	23.8241	28.8565	29.0634	29.2298	4.47367	3.34429
1529	RBM34	P42696	RNA-binding protein 34	5	13	26.6572	25.4031	25.5779	23.848	24.4411	25.1607	-1.39611	1.20232
1530	RBM39	Q14498	RNA-binding protein 39	17	149	29.7304	29.5957	29.4916	28.9713	29.092	28.904	-0.616783	2.65514
1531	RBM4	Q9BWF3	RNA-binding protein 4	13	49	28.6026	28.6938	28.6968	27.8752	27.8087	27.8327	-0.825525	4.6454
1532	RBM42	Q9BTD8	RNA-binding protein 42	5	22	25.3955	25.4191	26.4711	26.9416	26.8077	27.3314	1.26503	1.50802
1533	RBM8A	Q9Y5S9	RNA-binding protein 8A	1	13	24.2728	23.6831	24.6473	25.108	25.094	25.2464	0.948409	1.53596
1534	RBMS1	P29558	RNA-binding motif, single-stranded-interacting protein 1	3	7	24.6954	24.1032	23.5943	24.6158	25.3212	24.7786	0.774204	0.945728
1535	RBMX	P38159	RNA-binding motif protein, X chromosome;RNA-binding motif protein, X chromosome, N-terminally processed	39	333	33.2646	31.3104	30.4579	29.4747	29.6757	29.7611	-2.04044	1.14904
1536	RBX1	P62877	E3 ubiquitin-protein ligase RBX1;E3 ubiquitin-protein ligase RBX1, N-terminally processed	2	43	27.1298	24.3315	27.0309	27.3447	27.5601	27.3676	1.26008	0.615581
1537	RCC1	P18754	Regulator of chromosome condensation	20	262	30.3424	30.3782	30.4777	29.9958	30.0822	30.0528	-0.355851	2.76119
1538	RCC2	Q9P258	Protein RCC2	6	37	25.7758	26.0333	26.2431	26.9507	27.1619	27.3173	1.12592	2.55143
1539	RCN1	Q15293	Reticulocalbin-1	3	8	25.451	25.6594	25.8492	24.274	24.0204	24.4339	-1.41049	2.97302
1540	RCN2	Q14257	Reticulocalbin-2	7	48	27.9237	27.611	27.539	27.6032	27.7007	27.6873	-0.0274817	0.0794736
1541	RDH13	Q8NBN7	Retinol dehydrogenase 13	2	9	23.9758	24.7287	24.7583	24.8113	23.5257	24.3801	-0.248566	0.211171
1542	RDH14	Q9HBH5	Retinol dehydrogenase 14	3	19	25.2161	25.1486	23.2811	26.0822	25.898	25.7866	1.37366	1.00727
1543	RECQL	P46063	ATP-dependent DNA helicase Q1	4	26	26.4852	26.5642	26.5334	26.2614	26.7193	26.207	-0.131673	0.330444
1544	RELA	Q04206	Transcription factor p65	3	8	25.2762	25.1007	25.4999	24.6395	23.6673	23.7621	-1.26926	1.7347
1545	REPIN1	Q9BWE0	Replication initiator 1	3	12	23.6424	22.9166	22.4426	24.6728	24.4192	24.9697	1.68672	1.9318
1546	REPS1	Q96D71	RalBP1-associated Eps domain-containing protein 1	13	117	27.1051	27.3227	27.5478	29.0668	28.8927	28.9928	1.65888	3.56867
1547	RETNLB	Q9BQ08	Resistin-like beta	2	12	22.9496	23.5583	23.853	28.6396	27.455	27.967	4.56689	3.33583
1548	RFC1	P35251	Replication factor C subunit 1	4	15	25.464	24.2071	25.2292	25.3335	25.2542	25.5056	0.397671	0.433282
1549	RFC2	P35250	Replication factor C subunit 2	7	33	27.2909	27.3332	27.3614	26.9873	27.2744	27.1133	-0.20354	1.11862
1550	RFC3	P40938	Replication factor C subunit 3	5	31	26.2824	26.8009	26.4058	25.9211	26.2649	25.9585	-0.448212	1.1059
1551	RFC4	P35249	Replication factor C subunit 4	12	59	27.8465	28.3235	28.1013	27.5601	28.0569	27.6032	-0.35041	0.766835
1552	RFC5	P40937	Replication factor C subunit 5	4	29	27.1207	27.1405	27.5557	27.4904	26.9447	26.8751	-0.168898	0.28263
1553	RFX1	P22670	MHC class II regulatory factor RFX1	3	14	24.8072	23.1808	24.3023	26.2304	26.4737	26.7209	2.37822	2.04597
1554	RHOA	P61586	Transforming protein RhoA	7	87	28.3192	28.1391	28.5164	28.3619	28.4885	28.5131	0.129643	0.473985
1555	RHOG	P84095	Rho-related GTP-binding protein RhoG	3	22	26.304	26.6139	26.7428	25.7089	25.6027	25.6191	-0.909976	2.60597
1556	RHOT2	Q8IXI1	Mitochondrial Rho GTPase 2	6	32	26.8002	27.3509	26.9455	26.131	26.3017	26.4679	-0.731943	1.72843
1557	RIC8A	Q9NPQ8	Synembryn-A	4	10	25.1894	23.9017	24.5299	24.9764	24.9483	24.938	0.413881	0.483899
1558	RIF1	Q5UIP0	Telomere-associated protein RIF1	15	37	27.5317	26.1934	26.0446	28.2833	27.4803	28.249	1.4143	1.22876
1559	RIOK1	Q9BRS2	Serine/threonine-protein kinase RIO1	12	65	25.6672	23.3533	24.86	29.1824	29.1874	29.0788	4.52269	2.57864
1560	RIOK2	Q9BVS4	Serine/threonine-protein kinase RIO2	4	13	25.447	24.7961	25.4362	27.1348	26.4146	27.1297	1.66662	2.17997
1561	RNASEH2A	O75792	Ribonuclease H2 subunit A	7	46	27.5144	27.8837	27.8905	27.6232	27.4445	27.5057	-0.238424	0.818798
1562	RNF113A	O15541	RING finger protein 113A	4	14	23.5152	24.1268	23.152	26.2772	26.061	26.1375	2.56058	3.03389
1563	RNF2	Q99496	E3 ubiquitin-protein ligase RING2	6	32	26.4737	26.2649	26.4713	26.8391	27.2294	27.012	0.623555	2.03372
1564	RNF20	Q5VTR2	E3 ubiquitin-protein ligase BRE1A	9	45	26.8485	27.2768	27.0259	26.8829	27.0376	26.8884	-0.114133	0.353661
1565	RNF214	Q8ND24	RING finger protein 214	8	16	23.0654	25.1569	24.6663	26.4222	25.7657	26.0124	1.7706	1.2593
1566	RNF40	O75150	E3 ubiquitin-protein ligase BRE1B	14	91	27.7789	27.9606	28.404	28.1552	28.0367	28.1169	0.0551236	0.105172
1567	RNGTT	O60942	mRNA-capping enzyme;Polynucleotide 5-triphosphatase;mRNA guanylyltransferase	4	6	25.5087	25.8772	25.9265	25.5233	25.3789	23.8474	-0.854263	0.706089
1568	RNH1	P13489	Ribonuclease inhibitor	11	112	29.0983	29.7623	29.4652	28.6148	29.0831	28.8685	-0.586419	1.17366
1569	RNPEP	Q9H4A4	Aminopeptidase B	6	25	26.4623	27.0806	27.1136	26.7049	26.3424	26.7984	-0.270246	0.460595
1570	RNPS1	Q15287	RNA-binding protein with serine-rich domain 1	11	161	29.0551	27.9605	28.1958	29.897	30.0267	30.0213	1.57784	2.03278
1571	ROCK1	Q13464	Rho-associated protein kinase 1	4	6	24.1973	23.9194	23.6719	24.5617	24.0929	24.1853	0.350464	0.773372
1572	RPA1	P27694	Replication protein A 70 kDa DNA-binding subunit;Replication protein A 70 kDa DNA-binding subunit, N-terminally processed	10	105	29.0017	29.3761	29.093	29.346	29.5401	29.4237	0.279665	1.04218
1573	RPAP1	Q9BWH6	RNA polymerase II-associated protein 1	5	22	23.6294	23.9212	25.948	26.109	25.8282	26.1699	1.53617	0.977175
1574	RPAP3	Q9H6T3	RNA polymerase II-associated protein 3	25	177	26.0157	27.4301	27.0854	30.2204	30.2083	30.2134	3.3703	2.86042
1575	RPF2	Q9H7B2	Ribosome production factor 2 homolog	6	13	28.2652	24.5262	24.741	24.4087	24.5018	24.5568	-1.35505	0.486155
1576	RPL10	P27635	60S ribosomal protein L10	20	307	31.1887	30.7599	30.9501	30.7142	30.8474	30.7801	-0.18564	0.645836
1577	RPL10A	P62906	60S ribosomal protein L10a	21	276	31.5398	31.3442	31.7694	31.4066	31.5567	31.5647	-0.0418116	0.113925
1578	RPL11	P62913	60S ribosomal protein L11	18	266	32.1115	32.2018	32.5202	32.1733	32.1813	32.1871	-0.0972989	0.321866
1579	RPL12	P30050	60S ribosomal protein L12	8	170	31.1522	30.9791	31.3847	30.7577	30.334	30.6272	-0.599012	1.599
1580	RPL13	P26373	60S ribosomal protein L13	22	294	32.2078	31.6947	32.0312	32.1655	32.1278	32.1264	0.162027	0.463716
1581	RPL13A	P40429	60S ribosomal protein L13a	18	190	30.696	30.618	30.8823	30.6628	30.7181	30.6974	-0.0393467	0.187921
1582	RPL14	P50914	60S ribosomal protein L14	15	224	30.7968	30.5864	30.9559	30.3661	30.5632	30.5962	-0.271201	0.986384
1583	RPL15	P61313	60S ribosomal protein L15	14	208	31.8232	31.7629	31.4947	31.4533	31.2569	31.2147	-0.385291	1.43475
1584	RPL17	P18621	60S ribosomal protein L17	13	228	31.5686	31.4085	31.4569	30.9146	31.2557	31.0156	-0.415981	1.69031
1585	RPL18	Q07020	60S ribosomal protein L18	13	174	31.5276	31.2495	31.1941	31.1755	31.0385	31.0943	-0.22094	0.934198
1586	RPL18A	Q02543	60S ribosomal protein L18a	12	132	29.7967	30.1573	29.8817	30.2642	30.1034	30.0583	0.196725	0.71665
1587	RPL19	P84098	60S ribosomal protein L19	14	201	30.4935	30.1592	30.4874	32.2054	31.8043	31.9696	1.61303	3.25929
1588	RPL21	P46778	60S ribosomal protein L21	14	193	30.4947	30.2226	30.5685	30.6525	30.501	30.5857	0.15115	0.593005
1589	RPL22	P35268	60S ribosomal protein L22	8	121	30.1838	30.0971	30.1795	28.6651	29.1935	29.0858	-1.17198	2.69629
1590	RPL23	P62829	60S ribosomal protein L23	14	249	31.8226	31.509	31.3307	31.2417	31.4881	31.358	-0.191514	0.524997
1591	RPL23A	P62750	60S ribosomal protein L23a	15	267	32.01	31.6801	31.5775	31.9499	31.8693	31.8579	0.13651	0.438008
1592	RPL24	P83731	60S ribosomal protein L24	12	217	30.6825	30.4724	30.6168	30.9071	31.0367	31.1091	0.427043	2.12059
1593	RPL26	P61254	60S ribosomal protein L26	17	198	30.6544	30.3168	30.5279	31.9259	31.6487	31.7038	1.25979	3.19897
1594	RPL27	P61353	60S ribosomal protein L27	10	167	31.2451	31.1482	31.3855	30.7266	30.948	30.8565	-0.415908	1.9372
1595	RPL27A	P46776	60S ribosomal protein L27a	12	109	31.288	30.734	30.767	31.0219	30.978	31.0439	0.0849368	0.178892
1596	RPL28	P46779	60S ribosomal protein L28	18	180	30.6326	30.3398	30.7935	31.234	30.9951	31.0238	0.495672	1.50195
1597	RPL29	P47914	60S ribosomal protein L29	8	96	30.5896	30.5382	30.8448	31.7359	31.2002	31.4558	0.806448	1.94713
1598	RPL3	P39023	60S ribosomal protein L3	29	328	31.9537	31.326	31.552	31.9259	32.0025	31.9182	0.338299	0.846857
1599	RPL30	P62888	60S ribosomal protein L30	8	94	28.265	28.2922	28.2386	27.7601	28.0882	27.9819	-0.321852	1.5192
1600	RPL31	P62899	60S ribosomal protein L31	11	123	30.378	30.2093	30.3789	30.9782	30.62	30.8929	0.508291	1.85335
1601	RPL32	P62910	60S ribosomal protein L32	6	113	29.5296	29.0706	29.558	29.5872	29.48	29.3806	0.0965284	0.223202
1602	RPL34	P49207	60S ribosomal protein L34	11	157	29.9309	29.681	29.9317	30.3475	30.1521	30.3394	0.431793	1.83187
1603	RPL35	P42766	60S ribosomal protein L35	4	90	30.0176	29.6497	29.9214	29.2424	29.6615	29.2516	-0.477709	1.26824
1604	RPL35A	P18077	60S ribosomal protein L35a	6	65	29.0445	29.0942	29.4281	28.6504	28.4733	28.517	-0.642007	2.08665
1605	RPL36	Q9Y3U8	60S ribosomal protein L36	12	225	30.5466	30.3601	30.3581	30.4942	30.4261	30.5037	0.0530586	0.324945
1606	RPL36A	P83881	60S ribosomal protein L36a	7	68	28.0509	27.7962	27.9017	27.6546	27.6049	27.6881	-0.267057	1.57839
1607	RPL37	P61927	60S ribosomal protein L37	3	11	27.3634	27.3355	27.0388	28.2332	27.7129	27.944	0.717435	1.76451
1608	RPL38	P63173	60S ribosomal protein L38	7	161	30.9263	31.2765	31.0196	30.2381	30.4638	30.2829	-0.745838	2.39707
1609	RPL39P5;RPL39	Q59GN2;P62891	Putative 60S ribosomal protein L39-like 5;60S ribosomal protein L39	2	28	28.4318	27.9375	27.8463	28.7625	28.7236	28.7832	0.684632	1.69893
1610	RPL4	P36578	60S ribosomal protein L4	35	542	32.5582	32.4552	32.5597	32.3456	32.3449	32.4277	-0.151637	1.57683
1611	RPL5	P46777	60S ribosomal protein L5	21	328	30.9663	30.4066	30.6304	31.4606	31.4313	31.4652	0.784592	2.06739
1612	RPL6	Q02878	60S ribosomal protein L6	22	296	32.2	32.1181	32.3359	32.4067	32.2032	32.3575	0.104438	0.519664
1613	RPL7	P18124	60S ribosomal protein L7	24	292	32.2143	32.2376	32.1987	32.0178	32.0886	32.0491	-0.165073	2.67109
1614	RPL7A	P62424	60S ribosomal protein L7a	29	329	32.2727	31.9565	31.9375	31.9948	31.95	31.9706	-0.0837612	0.312637
1615	RPL7L1	Q6DKI1	60S ribosomal protein L7-like 1	7	11	28.4414	25.5534	25.2026	24.9538	25.4062	25.0988	-1.24617	0.53038
1616	RPL8	P62917	60S ribosomal protein L8	20	234	31.7383	31.5312	31.7593	32.4442	32.2876	32.3176	0.673571	2.82084
1617	RPL9	P32969	60S ribosomal protein L9	16	246	30.931	31.1148	31.1737	30.2782	30.4723	30.2408	-0.74274	2.71695
1618	RPLP0;RPLP0P6	P05388;Q8NHW5	60S acidic ribosomal protein P0;60S acidic ribosomal protein P0-like	18	145	31.124	31.2082	31.1324	29.8087	30.1099	29.8337	-1.23744	3.60826
1619	RPLP1	P05386	60S acidic ribosomal protein P1	4	75	30.6661	30.4275	30.4271	28.7476	28.9569	28.8567	-1.65316	4.10662
1620	RPLP2	P05387	60S acidic ribosomal protein P2	12	161	29.9467	29.6629	30.0535	29.3135	29.7744	29.6321	-0.314384	0.811316
1621	RPN1	P04843	Dolichyl-diphosphooligosaccharide--protein glycosyltransferase subunit 1	16	154	29.0076	29.3278	29.2685	30.0697	29.7899	30.0005	0.752052	2.36006
1622	RPN2	P04844	Dolichyl-diphosphooligosaccharide--protein glycosyltransferase subunit 2	6	26	26.38	26.6822	27.2848	24.1345	24.9301	26.0261	-1.75205	1.34441
1623	RPP25L	Q8N5L8	Ribonuclease P protein subunit p25-like protein	4	19	24.7862	24.3883	23.5897	26.351	26.722	26.6529	2.32055	2.4826
1624	RPP30	P78346	Ribonuclease P protein subunit p30	3	18	25.5378	26.3915	25.8247	25.3294	25.2244	25.5885	-0.537224	0.918513
1625	RPRD1B	Q9NQG5	Regulation of nuclear pre-mRNA domain-containing protein 1B	7	28	22.9483	23.4122	24.2525	27.5566	27.5077	27.5433	3.99825	3.32717
1626	RPRD2	Q5VT52	Regulation of nuclear pre-mRNA domain-containing protein 2	16	47	23.1645	23.7598	25.9811	28.585	28.0436	28.728	4.15039	2.03289
1627	RPS10	P46783	40S ribosomal protein S10	10	140	30.4933	30.3703	30.6833	30.8459	30.7146	30.7515	0.255028	1.20951
1628	RPS11	P62280	40S ribosomal protein S11	23	235	31.9323	31.8246	31.8457	32.0723	31.9654	31.9166	0.117184	0.970578
1629	RPS12	P25398	40S ribosomal protein S12	11	196	29.9959	30.1782	30.5159	29.8205	30.1778	29.8608	-0.276944	0.66153
1630	RPS13	P62277	40S ribosomal protein S13	20	252	31.4897	31.0758	31.1256	30.3894	30.6772	30.4318	-0.730913	2.00404
1631	RPS14	P62263	40S ribosomal protein S14	10	245	32.3211	32.0588	32.2618	32.4875	32.4018	32.5615	0.269719	1.37142
1632	RPS15	P62841	40S ribosomal protein S15	9	183	30.8989	30.2934	30.4501	30.9964	31.1693	30.9682	0.49715	1.21638
1633	RPS15A	P62244	40S ribosomal protein S15a	12	173	30.6609	30.4708	30.7553	29.9241	30.2938	30.0519	-0.539078	1.76926
1634	RPS16	P62249	40S ribosomal protein S16	13	178	30.4777	30.7801	30.5002	30.5457	30.5385	30.3451	-0.10955	0.394115
1635	RPS17	P08708	40S ribosomal protein S17	13	309	31.7792	31.6631	31.9037	32.0861	31.8483	31.9381	0.175495	0.828956
1636	RPS18	P62269	40S ribosomal protein S18	18	283	32.3643	32.3171	32.2409	31.5037	31.9668	31.6656	-0.595411	1.87787
1637	RPS19	P39019	40S ribosomal protein S19	14	169	30.8577	30.3654	30.2553	31.1901	31.0539	31.0883	0.617954	1.50673
1638	RPS2	P15880	40S ribosomal protein S2	23	359	31.5336	31.5169	31.6606	31.7014	31.7519	31.6174	0.119869	0.934496
1639	RPS20	P60866	40S ribosomal protein S20	13	179	31.9431	32.1502	32.4297	32.008	31.9304	32.0009	-0.194565	0.609736
1640	RPS21	P63220	40S ribosomal protein S21	6	36	25.2152	26.2484	26.2183	28.076	27.9272	28.151	2.15746	2.47318
1641	RPS23	P62266	40S ribosomal protein S23	13	101	30.2964	29.7648	29.7803	30.7913	29.6829	30.3047	0.312435	0.356036
1642	RPS24	P62847	40S ribosomal protein S24	10	116	29.9662	29.7663	29.8254	29.5122	29.8377	29.6325	-0.191855	0.790803
1643	RPS25	P62851	40S ribosomal protein S25	12	138	30.3058	30.3282	29.9828	30.3647	30.5976	30.4594	0.26833	0.963006
1644	RPS26;RPS26P11	P62854;Q5JNZ5	40S ribosomal protein S26;Putative 40S ribosomal protein S26-like 1	5	46	28.143	28.2202	27.798	27.4122	27.246	26.9888	-0.838062	2.02594
1645	RPS27	P42677	40S ribosomal protein S27	7	73	30.9583	31.0241	31.2305	31.4415	31.3076	31.2969	0.27769	1.37476
1646	RPS27A;UBB;UBC	P62979;P0CG47;P0CG48	Ubiquitin-40S ribosomal protein S27a;Ubiquitin;40S ribosomal protein S27a;Polyubiquitin-B;Ubiquitin;Polyubiquitin-C;Ubiquitin	8	119	28.9669	28.5688	28.7977	29.0031	29.1312	29.1157	0.305475	1.17525
1647	RPS27L	Q71UM5	40S ribosomal protein S27-like	6	15	28.3686	28.2539	28.5895	28.2112	27.9228	28.0912	-0.328976	1.19663
1648	RPS29	P62273	40S ribosomal protein S29	4	44	30.4903	30.3564	30.0883	29.9168	30.0073	29.9954	-0.338467	1.30475
1649	RPS3	P23396	40S ribosomal protein S3	30	403	31.8797	32.2025	32.1958	31.5425	31.9429	31.6753	-0.372461	1.10303
1650	RPS3A	P61247	40S ribosomal protein S3a	34	672	32.6297	32.26	32.45	33.0907	33.1076	33.0498	0.636092	2.38001
1651	RPS4X	P62701	40S ribosomal protein S4, X isoform	32	423	32.5754	32.3767	32.5079	31.8358	31.9251	31.8384	-0.620206	3.16382
1652	RPS5	P46782	40S ribosomal protein S5;40S ribosomal protein S5, N-terminally processed	24	331	31.4325	31.5729	31.6253	31.258	31.0975	31.2739	-0.333794	1.84392
1653	RPS6	P62753	40S ribosomal protein S6	18	318	31.838	31.5299	31.7225	31.9888	31.8542	31.9031	0.218612	1.04682
1654	RPS7	P62081	40S ribosomal protein S7	18	253	31.7172	30.8341	31.0022	31.5864	31.8036	31.7467	0.527749	0.882921
1655	RPS8	P62241	40S ribosomal protein S8	18	232	31.8651	32.0908	31.9895	31.4669	31.5985	31.5625	-0.439168	2.34773
1656	RPS9	P46781	40S ribosomal protein S9	20	167	30.8144	30.7552	30.6524	30.2666	30.5274	30.1879	-0.413374	1.66545
1657	RPSA	P08865	40S ribosomal protein SA	10	81	28.7078	28.7227	28.8403	28.799	28.9818	29.0544	0.188166	1.01791
1658	RPUSD2	Q8IZ73	RNA pseudouridylate synthase domain-containing protein 2	2	14	23.0925	24.137	23.5596	23.7876	24.6379	24.7757	0.804059	0.865549
1659	RRBP1	Q9P2E9	Ribosome-binding protein 1	37	167	27.9961	28.3198	28.5559	29.8814	30.0724	29.8328	1.63826	3.1113
1660	RRM1	P23921	Ribonucleoside-diphosphate reductase large subunit	12	92	28.4409	28.6573	28.5337	27.5018	27.822	27.3785	-0.976562	2.58244
1661	RRP1	P56182	Ribosomal RNA processing protein 1 homolog A	9	31	27.8244	26.2798	26.2255	27.114	27.0323	27.2604	0.35897	0.27231
1662	RRP12	Q5JTH9	RRP12-like protein	12	72	27.6636	27.9112	27.8188	27.9808	27.9009	28.1075	0.19856	0.990241
1663	RRP15	Q9Y3B9	RRP15-like protein	8	26	27.5378	25.6647	25.6133	26.2338	26.1753	26.0536	-0.117689	0.0644664
1664	RRP1B	Q14684	Ribosomal RNA processing protein 1 homolog B	27	155	29.5353	29.1722	29.0428	29.7627	29.569	29.7731	0.451475	1.30815
1665	RRS1	Q15050	Ribosome biogenesis regulatory protein homolog	10	27	28.9007	25.5148	26.0632	24.998	25.5054	25.7773	-1.39932	0.580907
1666	RSBN1L	Q6PCB5	Round spermatid basic protein 1-like protein	6	20	22.9771	24.2096	24.1536	26.5076	26.3543	26.6206	2.71406	2.57185
1667	RSL1D1	O76021	Ribosomal L1 domain-containing protein 1	23	145	30.9909	29.6192	29.6267	30.0301	29.8254	29.8393	-0.180687	0.145731
1668	RSL24D1	Q9UHA3	Probable ribosome biogenesis protein RLP24	6	8	27.5931	24.8374	24.8465	25.5453	23.9311	25.1483	-0.884089	0.354352
1669	RSRC2	Q7L4I2	Arginine/serine-rich coiled-coil protein 2	2	10	23.9258	24.0775	23.7758	25.1522	24.8424	25.1443	1.11997	2.94927
1670	RTCA	O00442	RNA 3-terminal phosphate cyclase	5	21	25.7676	25.7527	25.2791	24.7194	25.1184	24.8871	-0.691505	1.60268
1671	RTCB	Q9Y3I0	tRNA-splicing ligase RtcB homolog	28	279	30.9997	31.1346	31.0815	31.0609	31.1127	31.097	0.0182927	0.163456
1672	RTF1	Q92541	RNA polymerase-associated protein RTF1 homolog	4	6	24.3969	24.2721	23.8577	25.7978	25.9304	25.7511	1.65087	3.18534
1673	RTFDC1	Q9BY42	Protein RTF2 homolog	8	34	26.5235	26.6706	26.953	26.9444	25.9289	26.823	-0.150318	0.164457
1674	RTN4	Q9NQC3	Reticulon-4	5	18	23.5252	23.5317	23.2244	27.1918	27.0144	27.3042	3.74302	5.03752
1675	RUFY1	Q96T51	RUN and FYVE domain-containing protein 1	2	16	23.501	23.7383	23.3604	26.3364	26.4918	26.6693	2.9659	4.45624
1676	RUVBL1	Q9Y265	RuvB-like 1	30	333	30.2829	30.6144	30.6602	31.7856	31.8555	31.8016	1.29508	3.36878
1677	RUVBL2	Q9Y230	RuvB-like 2	35	333	31.1887	31.5013	31.5557	31.1105	31.0975	31.0948	-0.314308	1.28759
1678	SAE1	Q9UBE0	SUMO-activating enzyme subunit 1;SUMO-activating enzyme subunit 1, N-terminally processed	22	242	30.1177	30.3269	30.3952	31.0683	30.9946	31.1145	0.779205	3.00002
1679	SAFB	Q15424	Scaffold attachment factor B1	35	151	32.7739	30.4669	29.2582	28.8486	29.1562	29.3612	-1.71102	0.754698
1680	SAFB2	Q14151	Scaffold attachment factor B2	33	41	30.5668	28.732	26.4594	26.0111	26.3558	26.5194	-2.29062	0.891782
1681	SALL2	Q9Y467	Sal-like protein 2	3	17	30.5386	24.3067	23.7371	30.2465	30.6218	30.6834	4.3231	0.925475
1682	SAMHD1	Q9Y3Z3	Deoxynucleoside triphosphate triphosphohydrolase SAMHD1	7	33	26.811	27.0422	27.044	26.8338	26.9697	26.8811	-0.0708612	0.336194
1683	SAP130	Q9H0E3	Histone deacetylase complex subunit SAP130	3	11	23.0497	23.2487	23.7295	25.1204	24.655	24.9971	1.58151	2.52701
1684	SAP30BP	Q9UHR5	SAP30-binding protein	11	112	23.7489	23.8749	24.1886	30.1415	29.8541	30.007	6.0634	5.59481
1685	SARNP	P82979	SAP domain-containing ribonucleoprotein	6	20	24.8682	23.4511	24.1472	27.7399	27.5745	27.9115	3.58644	2.9842
1686	SARS	P49591	Serine--tRNA ligase, cytoplasmic	15	125	28.3001	28.8869	28.8085	28.5811	28.594	28.4359	-0.128194	0.26882
1687	SARS2	Q9NP81	Serine--tRNA ligase, mitochondrial	6	19	24.3292	23.4889	25.2934	24.4274	24.7951	24.6744	0.261796	0.187953
1688	SART1	O43290	U4/U6.U5 tri-snRNP-associated protein 1	21	106	25.0387	25.2874	25.4144	29.8898	29.5988	29.8787	4.54224	5.19951
1689	SART3	Q15020	Squamous cell carcinoma antigen recognized by T-cells 3	19	154	28.5323	28.8014	28.9163	30.2173	30.275	30.3491	1.53045	3.66201
1690	SBDS	Q9Y3A5	Ribosome maturation protein SBDS	6	17	26.2845	27.0972	26.7778	25.5043	25.335	25.1958	-1.37475	2.25652
1691	SBNO1	A3KN83	Protein strawberry notch homolog 1	5	10	24.0052	24.8421	23.8246	26.396	26.3573	25.7944	1.9586	2.2186
1692	SCAF1	Q9H7N4	Splicing factor, arginine/serine-rich 19	4	24	24.8856	24.1866	23.1779	26.8694	25.9905	25.9379	2.18255	1.70386
1693	SCAF4	O95104	Splicing factor, arginine/serine-rich 15	5	8	25.9518	23.2454	25.3435	26.4959	26.2986	26.6803	1.6447	0.929326
1694	SCAMP3	O14828	Secretory carrier-associated membrane protein 3	6	35	27.1357	27.6362	27.962	27.5109	27.3731	27.5186	-0.110432	0.170427
1695	SCAPER	Q9BY12	S phase cyclin A-associated protein in the endoplasmic reticulum	8	35	23.8871	23.8988	22.8384	27.6103	27.5101	27.7626	4.08622	3.46827
1696	SCFD1	Q8WVM8	Sec1 family domain-containing protein 1	14	83	27.5612	27.7556	28.101	27.9348	27.7189	27.3289	-0.145126	0.241077
1697	SCIN	Q9Y6U3	Adseverin	6	13	25.7292	25.2736	25.075	26.0042	26.0795	26.4202	0.808723	1.59755
1698	SCML2	Q9UQR0	Sex comb on midleg-like protein 2	20	197	28.7997	28.8695	28.7364	30.9197	30.7263	30.7975	2.01266	5.10244
1699	SCO2	O43819	Protein SCO2 homolog, mitochondrial	5	12	25.9578	26.0242	26.0243	23.9927	26.2616	26.049	-0.56768	0.321753
1700	SCOC	Q9UIL1	Short coiled-coil protein	2	11	23.5699	24.4926	23.8145	25.1925	24.8784	25.1065	1.10012	1.70941
1701	SCRIB	Q14160	Protein scribble homolog	23	92	27.9763	28.4387	28.147	28.7194	28.4839	28.7019	0.447747	1.35219
1702	SCRN1	Q12765	Secernin-1	4	37	26.2217	26.0964	26.3161	26.5398	26.0242	26.299	0.0762399	0.1789
1703	SCYL2	Q6P3W7	SCY1-like protein 2	3	12	25.222	25.5034	25.7888	25.4338	25.3468	25.4991	-0.0781867	0.174901
1704	SDAD1	Q9NVU7	Protein SDA1 homolog	6	11	23.1509	24.2973	24.3266	25.6668	25.4059	26.1227	1.80683	1.83
1705	SDF4	Q9BRK5	45 kDa calcium-binding protein	4	12	25.6361	26.1456	25.9964	25.8602	25.9609	26.0031	0.0153853	0.0330743
1706	SDHA	P31040	Succinate dehydrogenase [ubiquinone] flavoprotein subunit, mitochondrial	9	101	28.7336	28.8673	29.1631	28.1995	28.3238	28.1561	-0.694829	2.15348
1707	SDHB	P21912	Succinate dehydrogenase [ubiquinone] iron-sulfur subunit, mitochondrial	6	40	26.8399	27.0395	27.2637	27.2957	27.3992	27.3931	0.314967	1.16682
1708	SEC13	P55735	Protein SEC13 homolog	5	39	26.8949	27.9437	27.5617	27.3857	27.5186	27.3566	-0.0464916	0.0514822
1709	SEC16A	O15027	Protein transport protein Sec16A	12	63	26.5537	26.8673	27.1155	27.534	27.4546	27.5466	0.666276	1.80548
1710	SEC22B	O75396	Vesicle-trafficking protein SEC22b	5	34	26.7998	26.9014	27.4616	26.5459	26.6777	26.3967	-0.51419	1.09291
1711	SEC23A	Q15436	Protein transport protein Sec23A	12	26	26.5976	26.6195	26.5738	26.2817	26.4632	26.3333	-0.237597	1.88959
1712	SEC23B	Q15437	Protein transport protein Sec23B	14	64	28.3568	28.6897	28.1205	27.43	27.7762	27.79	-0.723616	1.63044
1713	SEC23IP	Q9Y6Y8	SEC23-interacting protein	10	68	27.1305	27.0739	27.2786	27.7353	27.5273	27.2656	0.348431	1.09984
1714	SEC24B	O95487	Protein transport protein Sec24B	3	16	26.4275	26.1532	26.4015	26.5557	26.8112	26.4516	0.278752	0.944707
1715	SEC24C	P53992	Protein transport protein Sec24C	9	82	27.9654	28.1865	28.3407	27.9751	28.0141	28.0037	-0.16653	0.692401
1716	SEC31A	O94979	Protein transport protein Sec31A	7	21	26.6757	27.2244	26.9763	26.7381	26.3976	26.5943	-0.382136	0.957461
1717	SEC61B	P60468	Protein transport protein Sec61 subunit beta	2	11	23.7227	23.8314	24.3884	24.3472	24.9321	24.5456	0.627462	1.09947
1718	SEH1L	Q96EE3	Nucleoporin SEH1	3	13	25.6571	26.1288	25.7895	23.342	23.9173	25.753	-1.52109	0.961937
1719	SELO	Q9BVL4	Selenoprotein O	3	8	23.867	25.0319	24.5619	26.0669	25.5887	25.9835	1.39273	1.70883
1720	SENP3	Q9H4L4	Sentrin-specific protease 3	3	39	26.2235	26.485	25.8643	26.445	26.2367	26.5486	0.219135	0.469942
1721	SEPHS1	P49903	Selenide, water dikinase 1	6	48	27.4562	27.872	27.8751	27.2469	27.3161	27.1516	-0.496206	1.55361
1722	SEPTIN11	Q9NVA2	Septin-11	5	11	24.0901	23.4564	23.9576	26.6499	26.5415	26.6891	2.79214	3.83361
1723	SEPTIN2	Q15019	Septin-2	14	78	24.7538	25.5497	26.3318	27.887	28.2507	28.6095	2.70397	2.24384
1724	SEPTIN7	Q16181	Septin-7	9	39	25.1834	24.3157	24.974	27.3583	27.7982	27.163	2.61541	2.90366
1725	SEPTIN9	Q9UHD8	Septin-9	30	208	29.3981	29.6125	29.9272	30.5421	30.3846	30.4917	0.826907	2.17144
1726	SERBP1	Q8NC51	Plasminogen activator inhibitor 1 RNA-binding protein	37	698	27.5738	27.2565	27.781	35.3669	35.2376	35.5765	7.85657	5.76686
1727	SERPINH1	P50454	Serpin H1	8	74	28.3254	28.7643	28.8206	28.2538	28.3306	28.2455	-0.360128	1.06539
1728	SETD1A	O15047	Histone-lysine N-methyltransferase SETD1A	4	5	24.9631	24.8045	25.3256	25.2032	25.1336	25.4355	0.226324	0.560386
1729	SF1	Q15637	Splicing factor 1	13	91	27.7588	27.9436	28.0241	29.1322	29.0234	28.9779	1.13568	3.62686
1730	SF3A1	Q15459	Splicing factor 3A subunit 1	13	109	27.3629	25.7982	27.9371	29.7671	29.6825	29.8418	2.73113	1.88501
1731	SF3A2	Q15428	Splicing factor 3A subunit 2	6	23	23.9154	25.4886	25.0325	27.6824	26.9709	26.3494	2.18876	1.64847
1732	SF3A3	Q12874	Splicing factor 3A subunit 3	15	81	27.2379	26.881	27.2593	29.1321	28.9736	29.0512	1.92624	3.90566
1733	SF3B1	O75533	Splicing factor 3B subunit 1	27	205	28.8964	28.7864	29.2085	30.6444	30.4487	30.5191	1.57366	3.46238
1734	SF3B2	Q13435	Splicing factor 3B subunit 2	37	278	29.0515	28.6503	29.3359	31.0288	30.9754	31.1366	2.03439	3.24212
1735	SF3B3	Q15393	Splicing factor 3B subunit 3	18	91	28.3461	28.6866	28.4034	28.2814	28.6905	28.2179	-0.0820847	0.170823
1736	SF3B5	Q9BWJ5	Splicing factor 3B subunit 5	2	12	25.6529	25.633	25.8358	25.887	26.0642	26.0554	0.294922	1.56733
1737	SF3B6	Q9Y3B4	Splicing factor 3B subunit 6	4	18	25.5903	26.0322	25.6569	25.9112	25.6108	25.4979	-0.0865205	0.177854
1738	SFPQ	P23246	Splicing factor, proline- and glutamine-rich	35	311	30.9045	30.8229	31.26	31.0528	31.0886	31.0681	0.074049	0.213667
1739	SFSWAP	Q12872	Splicing factor, suppressor of white-apricot homolog	7	31	25.7073	23.8244	25.7173	27.4626	27.358	27.4854	2.35236	1.69288
1740	SFT2D3	Q587I9	Vesicle transport protein SFT2C	2	8	24.8919	24.896	25.2874	24.7557	23.5828	24.4886	-0.749362	0.925393
1741	SFXN1	Q9H9B4	Sideroflexin-1	15	132	29.2454	30.0435	29.8462	29.0152	28.9997	28.9557	-0.721478	1.39771
1742	SH3GL1	Q99961	Endophilin-A2	12	59	24.1776	24.3644	26.5122	29.1258	28.8718	29.2864	4.07659	2.23703
1743	SH3GLB2	Q9NR46	Endophilin-B2	8	15	22.849	22.9904	25.262	27.6647	27.459	27.6075	3.87661	2.10795
1744	SH3KBP1	Q96B97	SH3 domain-containing kinase-binding protein 1	13	72	25.1076	25.0093	23.5131	28.8097	28.9741	28.959	4.37091	2.96464
1745	SH3PXD2B	A1X283	SH3 and PX domain-containing protein 2B	5	11	22.9399	23.492	24.4312	26.6303	26.0994	26.1968	2.68783	2.35207
1746	SHMT1	P34896	Serine hydroxymethyltransferase, cytosolic	7	37	26.1712	26.6979	26.9336	26.5806	26.4345	26.4865	-0.100372	0.164758
1747	SHMT2	P34897	Serine hydroxymethyltransferase, mitochondrial	38	573	32.3407	32.4242	32.595	31.7859	31.8668	31.752	-0.651742	2.86324
1748	SHPK	Q9UHJ6	Sedoheptulokinase	3	8	24.0479	24.3889	24.2469	24.2714	24.456	24.2885	0.110721	0.40835
1749	SIN3A	Q96ST3	Paired amphipathic helix protein Sin3a	10	37	26.1921	23.5163	25.7028	27.9254	27.6339	27.9024	2.68349	1.49982
1750	SIN3B	O75182	Paired amphipathic helix protein Sin3b	17	68	24.5192	25.6562	25.7651	28.0656	29.6304	27.652	3.13585	1.9123
1751	SIRT1	Q96EB6	NAD-dependent protein deacetylase sirtuin-1;SirtT1 75 kDa fragment	5	20	24.0477	25.684	23.8214	26.9104	26.4409	26.4491	2.08244	1.57652
1752	SKA1	Q96BD8	Spindle and kinetochore-associated protein 1	4	27	23.7234	24.4994	23.5024	26.4342	26.3828	26.7161	2.60259	2.9077
1753	SKA3	Q8IX90	Spindle and kinetochore-associated protein 3	10	75	23.8076	23.0411	23.791	29.2263	28.9585	29.1991	5.58138	4.5113
1754	SKIV2L	Q15477	Helicase SKI2W	9	20	25.9785	26.0975	26.1972	26.4516	26.2654	26.1928	0.212215	0.998504
1755	SKIV2L2	P42285	Superkiller viralicidic activity 2-like 2	21	156	28.6389	29.1589	29.072	29.0828	29.0361	28.9561	0.0684287	0.155097
1756	SLAIN2	Q9P270	SLAIN motif-containing protein 2	10	27	23.5284	23.1078	24.115	27.2023	26.8986	27.0115	3.45372	3.45889
1757	SLC12A2	P55011	Solute carrier family 12 member 2	4	33	24.7957	24.6234	24.9783	26.3503	26.121	26.0205	1.3648	3.18953
1758	SLC16A1	P53985	Monocarboxylate transporter 1	3	21	26.9335	27.072	27.6014	27.1638	27.2826	27.6361	0.158546	0.253765
1759	SLC1A5	Q15758	Neutral amino acid transporter B(0)	8	89	28.6494	28.9395	29.2417	29.6305	29.5469	29.502	0.61625	1.61153
1760	SLC25A1	P53007	Tricarboxylate transport protein, mitochondrial	6	39	26.863	27.294	27.4973	26.3053	26.6614	26.3484	-0.779739	1.63339
1761	SLC25A10	Q9UBX3	Mitochondrial dicarboxylate carrier	3	23	25.6284	25.8176	25.8307	24.6263	25.2206	25.4277	-0.667377	1.25829
1762	SLC25A11	Q02978	Mitochondrial 2-oxoglutarate/malate carrier protein	4	29	29.0627	29.2818	29.2082	28.3553	28.673	28.9213	-0.534353	1.41409
1763	SLC25A13	Q9UJS0	Calcium-binding mitochondrial carrier protein Aralar2	12	59	28.0182	28.633	28.3581	27.3546	27.3825	26.9546	-1.10593	2.0979
1764	SLC25A3	Q00325	Phosphate carrier protein, mitochondrial	9	92	29.9624	30.3831	30.3908	29.8278	30.0528	29.9178	-0.312584	0.937508
1765	SLC25A5	P05141	ADP/ATP translocase 2;ADP/ATP translocase 2, N-terminally processed	23	129	31.1675	31.7821	31.2037	30.158	30.5634	30.2078	-1.07471	1.98025
1766	SLC25A6	P12236	ADP/ATP translocase 3;ADP/ATP translocase 3, N-terminally processed	25	160	30.8691	31.1743	30.7274	29.8446	30.2133	30.0115	-0.900494	2.21871
1767	SLC3A2	P08195	4F2 cell-surface antigen heavy chain	12	138	28.1521	28.3824	28.5754	28.9903	29.1838	29.0423	0.702161	2.1827
1768	SLC4A1AP	Q9BWU0	Kanadaptin	4	15	24.8607	25.6141	24.9872	26.5033	26.2387	26.2679	1.18258	2.05593
1769	SLC4A7	Q9Y6M7	Sodium bicarbonate cotransporter 3	3	4	22.4999	24.0842	22.6616	25.2543	25.1181	24.9721	2.03298	1.78776
1770	SLC7A5	Q01650	Large neutral amino acids transporter small subunit 1	3	21	24.7169	23.1368	24.735	27.2745	27.2446	27.3317	3.08736	2.36286
1771	SLIRP	Q9GZT3	SRA stem-loop-interacting RNA-binding protein, mitochondrial	7	85	29.278	29.4571	29.716	29.0312	28.8972	28.9578	-0.521636	1.76527
1772	SLK	Q9H2G2	STE20-like serine/threonine-protein kinase	45	335	27.4122	28.1069	28.4773	31.4714	31.0604	31.2361	3.25718	3.2075
1773	SLTM	Q9NWH9	SAFB-like transcription modulator	11	35	29.1651	27.1736	26.5271	26.1175	26.0785	26.2695	-1.46678	0.856518
1774	SLU7	O95391	Pre-mRNA-splicing factor SLU7	6	25	25.7893	23.6669	25.3474	26.6369	26.0423	26.1702	1.34857	0.939531
1775	SMAD2	Q15796	Mothers against decapentaplegic homolog 2	5	18	26.0526	26.1403	26.2388	24.9805	25.8025	25.0517	-0.865689	1.49341
1776	SMAD5;SMAD1	Q99717;Q15797	Mothers against decapentaplegic homolog 5;Mothers against decapentaplegic homolog 1	6	24	26.5978	26.731	26.5749	26.3122	26.2984	26.1086	-0.394844	2.07254
1777	SMAP	O00193	Small acidic protein	4	23	22.8426	23.6135	22.9169	27.6814	27.2437	27.7127	4.42159	3.97616
1778	SMARCA4	P51532	Transcription activator BRG1	8	23	25.9878	26.2128	25.6465	25.7187	25.3805	26.0145	-0.244431	0.423575
1779	SMARCA5	O60264	SWI/SNF-related matrix-associated actin-dependent regulator of chromatin subfamily A member 5	24	132	28.915	28.4143	28.1129	28.3154	28.3794	28.3948	-0.117525	0.19144
1780	SMARCC1	Q92922	SWI/SNF complex subunit SMARCC1	6	16	23.038	22.1328	23.6012	25.7778	25.6987	25.2536	2.65268	2.35563
1781	SMARCC2	Q8TAQ2	SWI/SNF complex subunit SMARCC2	8	26	25.197	25.1025	25.8595	25.696	26.0551	25.4941	0.362114	0.554835
1782	SMARCE1	Q969G3	SWI/SNF-related matrix-associated actin-dependent regulator of chromatin subfamily E member 1	6	23	25.4186	25.9127	26.4133	27.6539	27.4198	27.6225	1.65054	2.29311
1783	SMC1A	Q14683	Structural maintenance of chromosomes protein 1A	47	249	30.0132	30.0065	30.2968	30.0656	30.0359	30.0734	-0.0471872	0.187118
1784	SMC2	O95347	Structural maintenance of chromosomes protein 2	22	94	28.2231	28.5784	28.8529	28.618	28.697	28.6033	0.0879784	0.181407
1785	SMC3	Q9UQE7	Structural maintenance of chromosomes protein 3	39	157	29.9809	29.8878	30.1306	29.7415	29.6079	29.4638	-0.395358	1.6804
1786	SMC4	Q9NTJ3	Structural maintenance of chromosomes protein 4	21	91	28.2951	28.4931	28.7909	28.4957	28.8217	28.436	0.0580699	0.112272
1787	SMCHD1	A6NHR9	Structural maintenance of chromosomes flexible hinge domain-containing protein 1	17	51	27.8452	28.256	28.2622	27.9733	27.789	27.9448	-0.218764	0.663673
1788	SMEK1	Q6IN85	Serine/threonine-protein phosphatase 4 regulatory subunit 3A	4	17	25.0597	24.0938	23.0268	26.4295	27.0618	26.5062	2.60575	1.86447
1789	SMG8	Q8ND04	Protein SMG8	7	29	25.8899	26.4943	26.2973	26.368	26.2517	26.2984	0.0789057	0.163949
1790	SMG9	Q9H0W8	Protein SMG9	5	40	23.2271	26.4437	26.2557	27.3491	27.0368	27.131	1.86348	0.825273
1791	SMN1	Q16637	Survival motor neuron protein	8	77	27.5379	27.8094	27.9629	28.5605	28.5055	28.5339	0.763235	2.43553
1792	SMS	P52788	Spermine synthase	9	70	28.0837	28.2154	28.5142	28.485	28.6712	28.4847	0.275854	0.908546
1793	SMU1	Q2TAY7	WD40 repeat-containing protein SMU1;WD40 repeat-containing protein SMU1, N-terminally processed	12	111	28.8254	29.1162	28.9233	27.8452	28.2519	28.1832	-0.861536	2.32084
1794	SNAP23	O00161	Synaptosomal-associated protein 23	3	4	23.6987	23.741	24.4032	27.2325	26.7665	27.1588	3.10498	3.48571
1795	SNAP29	O95721	Synaptosomal-associated protein 29	12	54	23.8315	23.0071	24.4475	27.99	27.9902	28.0059	4.23332	3.27446
1796	SNAPIN	O95295	SNARE-associated protein Snapin	5	31	24.3625	24.3116	24.1328	27.3117	27.5183	27.414	3.14573	5.36599
1797	SND1	Q7KZF4	Staphylococcal nuclease domain-containing protein 1	50	497	30.9418	31.0058	31.2396	31.6709	31.7449	31.5763	0.601632	2.3708
1798	SNRNP200	O75643	U5 small nuclear ribonucleoprotein 200 kDa helicase	29	174	29.1512	29.3438	29.2611	29.4243	29.5518	29.4095	0.209852	1.36583
1799	SNRNP40	Q96DI7	U5 small nuclear ribonucleoprotein 40 kDa protein	6	17	24.4575	23.9078	26.9205	27.7514	27.6913	27.7251	2.6273	1.32729
1800	SNRNP70	P08621	U1 small nuclear ribonucleoprotein 70 kDa	6	28	26.2625	25.3832	25.6777	27.0362	26.9878	27.0676	1.2561	2.07627
1801	SNRPA	P09012	U1 small nuclear ribonucleoprotein A	3	19	23.384	24.6789	24.7805	27.5562	27.1421	27.5301	3.12832	2.58065
1802	SNRPA1	P09661	U2 small nuclear ribonucleoprotein A	21	98	26.0625	25.0816	25.3916	29.6638	29.7987	29.5881	4.17165	3.83272
1803	SNRPB2	P08579	U2 small nuclear ribonucleoprotein B	3	18	25.6894	24.8008	23.4592	26.6258	27.2185	26.5757	2.15683	1.47057
1804	SNRPD1	P62314	Small nuclear ribonucleoprotein Sm D1	4	52	27.4705	27.8944	27.5898	27.9148	27.8208	27.7167	0.165874	0.52663
1805	SNRPD2	P62316	Small nuclear ribonucleoprotein Sm D2	6	46	28.4226	28.5438	28.4175	29.0397	28.8037	28.6804	0.379983	1.54673
1806	SNRPD3	P62318	Small nuclear ribonucleoprotein Sm D3	6	33	27.7018	27.668	27.4767	27.3494	27.5763	27.4509	-0.156621	0.749235
1807	SNRPE	P62304	Small nuclear ribonucleoprotein E	3	53	28.039	28.8709	28.4615	29.0821	28.7283	29.0889	0.509286	0.885264
1808	SNRPF	P62306	Small nuclear ribonucleoprotein F	2	34	27.155	26.2333	26.0562	27.1464	27.0067	26.9146	0.541043	0.711811
1809	SNRPN;SNRPB	P63162;P14678	Small nuclear ribonucleoprotein-associated protein N;Small nuclear ribonucleoprotein-associated proteins B and B	6	78	28.0064	28.358	28.0351	27.3523	27.8934	27.5871	-0.52226	1.26958
1810	SNTB2	Q13425	Beta-2-syntrophin	4	8	23.5824	25.5657	25.2244	25.4661	25.4857	25.4549	0.678074	0.481221
1811	SNW1	Q13573	SNW domain-containing protein 1	17	110	27.6935	26.9836	27.0186	29.3707	28.9629	29.1973	1.94506	2.77091
1812	SNX1	Q13596	Sorting nexin-1	9	86	24.1882	25.0809	25.4985	29.4619	29.4471	29.4599	4.53379	3.51996
1813	SNX18	Q96RF0	Sorting nexin-18	2	16	25.6005	25.7672	25.6247	25.8632	25.7307	25.8998	0.167036	1.07415
1814	SNX2	O60749	Sorting nexin-2	8	49	25.0202	25.1432	24.9282	28.618	28.322	28.6094	3.48592	5.1437
1815	SNX27	Q96L92	Sorting nexin-27	8	22	27.4438	27.3203	27.4426	26.816	27.2062	26.9725	-0.40399	1.54468
1816	SNX5	Q9Y5X3	Sorting nexin-5	3	16	23.1386	24.3431	23.1392	26.3236	26.5823	26.5353	2.94011	2.70163
1817	SNX6	Q9UNH7	Sorting nexin-6;Sorting nexin-6, N-terminally processed	12	86	24.8495	25.922	26.1021	28.636	28.7917	28.7135	3.08915	2.84674
1818	SNX9	Q9Y5X1	Sorting nexin-9	6	71	26.9681	26.7347	27.2588	27.6435	27.5994	28.0411	0.774159	1.69858
1819	SON	P18583	Protein SON	23	119	29.8206	28.449	28.6369	28.5267	28.2907	28.4364	-0.550892	0.562417
1820	SORD	Q00796	Sorbitol dehydrogenase	11	59	27.7933	28.1452	28.1282	27.765	27.8075	27.5374	-0.318925	1.05563
1821	SPAG5	Q96R06	Sperm-associated antigen 5	15	26	26.066	24.7328	23.1394	27.5268	28.2665	27.5778	3.14426	1.63408
1822	SPAG9	O60271	C-Jun-amino-terminal kinase-interacting protein 4	26	140	25.5968	24.8183	27.5353	30.5141	30.4828	30.7463	4.5976	2.31896
1823	SPATA31A6;SPATA31A7;SPATA31A5;SPATA31A1	Q5VVP1;Q8IWB4;Q5VU36;Q5TZJ5	Spermatogenesis-associated protein 31A6;Spermatogenesis-associated protein 31A7;Spermatogenesis-associated protein 31A5;Spermatogenesis-associated protein 31A1	1	10	23.3557	25.1199	23.436	28.3811	27.7631	27.9047	4.04574	2.58557
1824	SPATS2	Q86XZ4	Spermatogenesis-associated serine-rich protein 2	5	23	23.6379	24.3863	23.8401	26.6017	26.5473	26.5477	2.61082	3.50715
1825	SPDL1	Q96EA4	Protein Spindly	3	14	23.8476	24.9885	24.0141	26.3796	26.4403	26.4717	2.14713	2.41552
1826	SPECC1	Q5M775	Cytospin-B	2	9	22.4475	25.3077	25.2501	25.463	24.8295	25.0066	0.764571	0.326513
1827	SPECC1L	Q69YQ0	Cytospin-A	3	12	22.574	23.4805	23.9159	26.0994	25.8469	25.9522	2.64273	2.55739
1828	SPEN	Q96T58	Msx2-interacting protein	9	21	26.4002	25.0567	25.8593	26.1239	26.4751	26.3988	0.560495	0.623076
1829	SPG20	Q8N0X7	Spartin	8	58	26.5586	27.1589	27.1882	28.3231	28.2057	28.3885	1.33717	2.49066
1830	SPTAN1	Q13813	Spectrin alpha chain, non-erythrocytic 1	8	17	26.9739	25.6776	25.9607	25.0634	24.895	25.1507	-1.16768	1.36188
1831	SPTBN1	Q01082	Spectrin beta chain, non-erythrocytic 1	22	50	28.6843	27.4898	27.9879	26.3875	26.3395	26.2717	-1.7211	2.10858
1832	SPTLC1	O15269	Serine palmitoyltransferase 1	2	5	23.8376	25.068	24.3919	24.214	24.3012	24.2503	-0.17734	0.190347
1833	SQSTM1	Q13501	Sequestosome-1	11	98	27.5916	27.567	27.667	29.5252	29.3925	29.4334	1.84181	5.50899
1834	SREK1	Q8WXA9	Splicing regulatory glutamine/lysine-rich protein 1	4	13	23.0572	22.9591	24.2203	25.0337	25.9764	25.9753	2.24963	1.92854
1835	SRFBP1	Q8NEF9	Serum response factor-binding protein 1	5	13	23.4256	23.315	22.5253	27.1224	26.9135	26.9665	3.91217	3.75583
1836	SRM	P19623	Spermidine synthase	9	89	28.9245	29.6926	29.1837	28.5275	28.7354	28.596	-0.647315	1.29787
1837	SRP14	P37108	Signal recognition particle 14 kDa protein	10	65	28.2255	28.0677	28.0615	29.2084	29.229	29.3279	1.13683	4.19947
1838	SRP19	P09132	Signal recognition particle 19 kDa protein	5	29	23.8137	26.1664	26.5829	27.2602	27.5493	26.8316	1.69271	0.889526
1839	SRP54	P61011	Signal recognition particle 54 kDa protein	18	104	27.6471	28.6903	28.3092	29.2124	29.3122	29.2533	1.04376	1.56804
1840	SRP68	Q9UHB9	Signal recognition particle subunit SRP68	22	209	28.9071	29.257	29.1315	29.8144	30.0214	29.8166	0.785601	2.50772
1841	SRP72	O76094	Signal recognition particle subunit SRP72	16	44	25.7844	25.984	26.1112	27.5178	28.0789	27.9415	1.8862	3.20477
1842	SRP9	P49458	Signal recognition particle 9 kDa protein	6	23	26.0651	26.2955	25.9403	26.5785	26.875	26.5126	0.555066	1.65852
1843	SRPK1	Q96SB4	SRSF protein kinase 1	10	75	26.9573	27.0077	27.0952	28.0804	27.8715	28.051	0.980903	3.66646
1844	SRPK2	P78362	SRSF protein kinase 2;SRSF protein kinase 2 N-terminal;SRSF protein kinase 2 C-terminal	10	51	25.8961	26.0756	26.1965	27.946	27.9159	27.9328	1.87549	4.54835
1845	SRPR	P08240	Signal recognition particle receptor subunit alpha	11	44	27.7338	27.7069	27.7889	27.4275	27.7516	27.5371	-0.171153	0.806295
1846	SRPRB	Q9Y5M8	Signal recognition particle receptor subunit beta	7	61	27.1821	27.677	27.9244	28.0118	27.5957	27.9097	0.244563	0.413309
1847	SRRM1	Q8IYB3	Serine/arginine repetitive matrix protein 1	5	11	25.473	23.8586	24.2305	26.4221	26.4516	26.442	1.91783	1.76637
1848	SRRM2	Q9UQ35	Serine/arginine repetitive matrix protein 2	31	343	29.9894	29.763	29.5326	31.0327	30.7395	30.9574	1.14819	2.71514
1849	SRRT	Q9BXP5	Serrate RNA effector molecule homolog	23	200	29.4635	29.9345	29.673	29.1359	29.4803	29.1303	-0.441489	1.16128
1850	SRSF1	Q07955	Serine/arginine-rich splicing factor 1	17	65	30.2619	28.1837	28.2228	27.2187	27.272	27.4411	-1.57887	1.07628
1851	SRSF10	O75494	Serine/arginine-rich splicing factor 10	10	75	31.4195	29.6474	28.8704	28.3451	28.4666	28.5521	-1.5245	0.942387
1852	SRSF11	Q05519	Serine/arginine-rich splicing factor 11	8	81	28.3412	28.101	28.5841	28.4375	28.5319	28.5654	0.169496	0.513971
1853	SRSF2	Q01130	Serine/arginine-rich splicing factor 2	3	31	27.5622	25.8925	27.3033	24.9993	25.2266	25.5074	-1.67491	1.44357
1854	SRSF3	P84103	Serine/arginine-rich splicing factor 3	6	28	30.7682	27.6392	28.5182	27.1246	26.5349	26.7519	-2.17145	1.0773
1855	SRSF5	Q13243	Serine/arginine-rich splicing factor 5	5	34	26.9422	25.9129	26.4927	27.1022	27.2016	27.1708	0.708943	1.11364
1856	SRSF6	Q13247	Serine/arginine-rich splicing factor 6	8	66	29.6498	28.3341	28.5249	29.2308	28.9888	29.2226	0.311134	0.30269
1857	SRSF7	Q16629	Serine/arginine-rich splicing factor 7	6	14	28.5934	25.6986	26.6195	24.0882	25.1845	25.2616	-2.12571	1.06951
1858	SRSF9	Q13242	Serine/arginine-rich splicing factor 9	16	74	31.4026	29.417	28.4534	27.0373	27.5497	27.7329	-2.31774	1.21963
1859	SS18	Q15532	Protein SSXT	2	3	22.9571	24.4701	24.1889	25.3536	25.1343	25.423	1.43159	1.41075
1860	SSB	P05455	Lupus La protein	10	61	26.7577	26.6718	27.4148	28.3814	27.9744	28.2552	1.25553	2.05077
1861	SSBP1	Q04837	Single-stranded DNA-binding protein, mitochondrial	5	28	27.2452	26.628	26.7214	26.4265	26.3873	26.4016	-0.459748	1.12373
1862	SSR3	Q9UNL2	Translocon-associated protein subunit gamma	2	22	25.9489	25.9829	26.2125	25.7472	25.8302	25.7676	-0.26641	1.43296
1863	SSR4	P51571	Translocon-associated protein subunit delta	7	41	26.368	26.9504	26.8638	26.4989	26.3879	26.6915	-0.201316	0.425686
1864	SSRP1	Q08945	FACT complex subunit SSRP1	16	98	29.3479	29.2462	29.1719	28.6346	28.8385	28.8009	-0.497379	2.45204
1865	SSU72	Q9NP77	RNA polymerase II subunit A C-terminal domain phosphatase SSU72	4	13	25.0225	25.2366	25.076	25.1006	25.3761	25.2752	0.138955	0.604278
1866	ST13;ST13P5;ST13P4	P50502;Q8NFI4;Q8IZP2	Hsc70-interacting protein;Putative protein FAM10A5;Putative protein FAM10A4	7	45	27.464	27.3257	27.5276	26.1439	26.1604	26.1413	-1.29054	4.5614
1867	STAMBP	O95630	STAM-binding protein	3	19	24.1975	24.2062	24.2414	26.5495	26.271	26.4765	2.21731	4.90281
1868	STAT1	P42224	Signal transducer and activator of transcription 1-alpha/beta	6	29	25.8317	26.0671	26.0516	26.0547	26.166	26.0519	0.107396	0.562094
1869	STAT3	P40763	Signal transducer and activator of transcription 3	5	11	23.8871	22.4477	24.054	26.0116	26.5063	26.1775	2.76887	2.19253
1870	STAU1	O95793	Double-stranded RNA-binding protein Staufen homolog 1	20	216	29.8931	29.2021	29.2374	30.2405	30.3257	30.2738	0.835748	1.68024
1871	STAU2	Q9NUL3	Double-stranded RNA-binding protein Staufen homolog 2	7	19	26.3739	23.8295	24.5624	26.9792	26.7242	27.033	1.99018	1.22665
1872	STIP1	P31948	Stress-induced-phosphoprotein 1	4	14	25.0096	24.8887	25.1409	25.8852	26.0068	26.008	0.953615	3.47572
1873	STK26	Q9P289	Serine/threonine-protein kinase 26	7	75	27.6961	28.0356	27.7088	27.6427	28.0641	27.7805	0.0155919	0.0315587
1874	STK3	Q13188	Serine/threonine-protein kinase 3;Serine/threonine-protein kinase 3 36kDa subunit;Serine/threonine-protein kinase 3 20kDa subunit	6	16	23.3069	24.149	23.6985	24.9183	24.9735	25.1861	1.30782	2.15491
1875	STK38	Q15208	Serine/threonine-protein kinase 38	4	13	24.642	22.9512	22.9911	26.1781	25.9049	25.7472	2.41531	1.87356
1876	STK4	Q13043	Serine/threonine-protein kinase 4;Serine/threonine-protein kinase 4 37kDa subunit;Serine/threonine-protein kinase 4 18kDa subunit	9	44	26.0901	26.5284	26.4262	27.7092	27.4661	27.3603	1.16366	2.64284
1877	STMN1	P16949	Stathmin	13	114	23.8028	24.1996	25.0814	30.507	30.0645	30.312	5.93323	3.92429
1878	STOML2	Q9UJZ1	Stomatin-like protein 2, mitochondrial	14	111	29.4156	29.626	29.7812	29.3776	29.3508	29.2343	-0.286724	1.17532
1879	STRAP	Q9Y3F4	Serine-threonine kinase receptor-associated protein	14	98	28.0473	28.344	28.0816	29.0395	29.0871	28.8421	0.831978	2.64322
1880	STRN	O43815	Striatin	6	28	22.5169	23.1141	24.4255	27.5624	27.6951	27.6378	4.27959	2.7882
1881	STRN3	Q13033	Striatin-3	8	45	23.7988	23.5039	23.7756	27.7936	27.6976	27.7418	4.05156	5.67766
1882	STRN4	Q9NRL3	Striatin-4	11	34	24.4655	23.9181	23.931	27.7427	27.9878	27.8799	3.7653	4.38323
1883	STT3B	Q8TCJ2	Dolichyl-diphosphooligosaccharide--protein glycosyltransferase subunit STT3B	2	9	25.2347	24.7894	24.269	25.5241	25.2256	25.2613	0.572667	0.907531
1884	STUB1	Q9UNE7	E3 ubiquitin-protein ligase CHIP	21	167	30.0932	30.2316	30.5241	30.2575	30.1325	30.2026	-0.0854403	0.257317
1885	STXBP1	P61764	Syntaxin-binding protein 1	2	18	23.7456	23.4645	23.8414	24.4942	24.4989	24.0789	0.673494	1.70192
1886	STXBP3	O00186	Syntaxin-binding protein 3	4	9	24.8937	25.064	24.4772	24.558	24.2629	24.4295	-0.394826	0.951999
1887	SUB1	P53999	Activated RNA polymerase II transcriptional coactivator p15	5	51	26.6935	26.1065	27.2427	27.7216	27.8014	28.1039	1.19472	1.57691
1888	SUCLA2	Q9P2R7	Succinyl-CoA ligase [ADP-forming] subunit beta, mitochondrial	9	25	27.1673	27.4582	27.2229	26.7391	25.8934	26.7261	-0.829946	1.32318
1889	SUCLG1	P53597	Succinyl-CoA ligase [ADP/GDP-forming] subunit alpha, mitochondrial	9	57	28.0447	28.0306	28.3625	27.7325	27.8075	27.554	-0.447958	1.56272
1890	SUCLG2	Q96I99	Succinyl-CoA ligase [GDP-forming] subunit beta, mitochondrial	6	15	26.1054	26.0071	26.3313	25.2678	26.0597	26.217	-0.299766	0.412384
1891	SUGP1	Q8IWZ8	SURP and G-patch domain-containing protein 1	10	44	24.0181	23.966	23.8563	27.6292	27.7496	27.787	3.77515	6.21663
1892	SUGP2	Q8IX01	SURP and G-patch domain-containing protein 2	15	92	27.3213	27.688	27.7959	28.2266	28.315	28.2526	0.662975	1.97905
1893	SUGT1	Q9Y2Z0	Suppressor of G2 allele of SKP1 homolog	12	119	29.4881	29.5763	29.7626	29.694	29.8281	29.6036	0.0995827	0.406526
1894	SUPT16H	Q9Y5B9	FACT complex subunit SPT16	24	199	30.545	29.3519	29.2587	30.3049	30.0325	30.1208	0.434203	0.441918
1895	SUPT4H1	P63272	Transcription elongation factor SPT4	2	11	25.9172	23.6844	25.8912	26.3688	26.7486	26.633	1.41918	0.883329
1896	SUPT5H	O00267	Transcription elongation factor SPT5	6	52	27.0875	27.2517	27.1393	27.9359	27.9412	28.0152	0.804608	3.90203
1897	SUPT6H	Q7KZ85	Transcription elongation factor SPT6	6	21	24.4329	24.0381	26.3685	26.4877	26.5455	26.5393	1.57765	1.02842
1898	SUPV3L1	Q8IYB8	ATP-dependent RNA helicase SUPV3L1, mitochondrial	2	29	26.284	26.54	26.4718	26.2946	26.1396	26.2736	-0.196032	1.01499
1899	SURF6	O75683	Surfeit locus protein 6	10	61	28.1112	26.1492	26.9072	28.9133	28.7782	28.9683	1.83071	1.47832
1900	SUZ12	Q15022	Polycomb protein SUZ12	2	11	23.8882	24.4624	23.9796	24.8426	24.9634	25.071	0.848917	1.95531
1901	SWAP70	Q9UH65	Switch-associated protein 70	3	4	22.9039	24.3314	25.2587	24.923	25.3952	25.0438	0.955956	0.61362
1902	SYAP1	Q96A49	Synapse-associated protein 1	7	32	25.3431	25.2	23.8439	28.2183	28.4182	28.2006	3.48334	2.70859
1903	SYNCRIP	O60506	Heterogeneous nuclear ribonucleoprotein Q	24	103	29.0445	28.8088	28.6256	28.6208	29.0271	28.5859	-0.0816911	0.165057
1904	SYNJ1	O43426	Synaptojanin-1	11	40	24.0698	23.9881	24.4714	27.4626	27.7452	27.553	3.41046	4.42802
1905	SYNJ2	O15056	Synaptojanin-2	9	26	23.374	24.0437	23.9805	27.601	27.3659	27.5266	3.69846	4.09975
1906	SYNRG	Q9UMZ2	Synergin gamma	5	17	24.8768	23.2917	22.5943	26.0401	25.9587	25.9255	2.38718	1.61584
1907	TAB1	Q15750	TGF-beta-activated kinase 1 and MAP3K7-binding protein 1	3	5	23.7419	23.5799	23.9447	25.6762	25.2523	25.5013	1.72109	3.35154
1908	TAB2	Q9NYJ8	TGF-beta-activated kinase 1 and MAP3K7-binding protein 2	8	34	25.0631	25.619	25.4941	26.7638	26.9035	26.92	1.47037	2.95425
1909	TACC1	O75410	Transforming acidic coiled-coil-containing protein 1	14	77	23.1473	24.5989	23.2267	29.4199	29.1785	29.4141	5.67987	3.54221
1910	TACC2	O95359	Transforming acidic coiled-coil-containing protein 2	4	10	23.5601	23.6471	24.5139	26.6228	26.7314	26.6721	2.7684	3.08209
1911	TACC3	Q9Y6A5	Transforming acidic coiled-coil-containing protein 3	12	69	23.7615	23.8922	24.0674	28.4545	28.5061	28.4983	4.57928	6.04814
1912	TACO1	Q9BSH4	Translational activator of cytochrome c oxidase 1	3	14	26.7456	26.509	26.8727	23.3916	25.9132	24.6073	-2.07171	1.31831
1913	TADA3	O75528	Transcriptional adapter 3	6	18	23.9204	24.2473	25.6112	26.8563	26.9126	27.6736	2.55456	1.93103
1914	TAF1;TAF1L	P21675;Q8IZX4	Transcription initiation factor TFIID subunit 1;Transcription initiation factor TFIID subunit 1-like	10	38	23.865	24.0783	23.628	27.0486	27.6357	27.4776	3.53019	4.06755
1915	TAF15	Q92804	TATA-binding protein-associated factor 2N	10	37	31.1767	27.5697	25.2312	24.0478	23.8852	24.7636	-3.76036	1.00813
1916	TAF6	P49848	Transcription initiation factor TFIID subunit 6	3	14	23.298	24.2123	24.2334	25.4318	25.444	25.5683	1.56679	2.13511
1917	TAF7	Q15545	Transcription initiation factor TFIID subunit 7	7	37	23.4221	24.6885	23.0841	28.4669	28.2299	28.224	4.57539	3.1189
1918	TAGLN2	P37802	Transgelin-2	21	323	29.0612	28.9356	29.2884	32.1579	32.2247	32.133	3.07679	5.06371
1919	TALDO1	P37837	Transaldolase	6	17	25.5621	25.6488	25.4972	25.6892	26.2845	25.8908	0.385418	1.00321
1920	TANC1	Q9C0D5	Protein TANC1	6	25	22.9666	22.4605	22.9306	26.3577	26.0895	26.1688	3.41947	4.33127
1921	TANGO6	Q9C0B7	Transport and Golgi organization protein 6 homolog	3	5	24.5374	24.2506	25.1167	25.4865	25.1791	25.2591	0.673377	1.169
1922	TARDBP	Q13148	TAR DNA-binding protein 43	17	189	30.7069	30.8609	30.9732	30.5114	30.4268	30.4723	-0.376786	2.01602
1923	TARS	P26639	Threonine--tRNA ligase, cytoplasmic	44	466	31.4579	31.9309	31.6659	31.1118	31.4342	31.1533	-0.451848	1.24611
1924	TARS2	Q9BW92	Threonine--tRNA ligase, mitochondrial	16	75	27.9953	28.3999	28.0851	27.4466	27.663	27.6303	-0.580118	1.84412
1925	TBC1D10B	Q4KMP7	TBC1 domain family member 10B	3	14	24.4156	22.144	23.8032	26.2538	26.2149	26.4973	2.86769	1.86018
1926	TBC1D15	Q8TC07	TBC1 domain family member 15	9	60	24.8297	25.1495	25.4532	28.606	28.8666	29.0008	3.68034	4.17279
1927	TBC1D2B	Q9UPU7	TBC1 domain family member 2B	5	9	24.3451	23.985	23.9681	25.2517	25.2679	25.8737	1.36501	2.33435
1928	TBC1D4	O60343	TBC1 domain family member 4	5	22	24.88	24.0264	25.688	25.8376	26.0663	26.383	1.2308	1.1459
1929	TBC1D5	Q92609	TBC1 domain family member 5	4	7	24.0863	25.0683	24.0731	26.9087	26.4748	27.0192	2.39171	2.53425
1930	TBCB	Q99426	Tubulin-folding cofactor B	16	199	30.9354	31.0326	31.3724	31.285	31.3439	31.3973	0.228626	0.772246
1931	TBCE	Q15813	Tubulin-specific chaperone E	14	80	28.9641	29.4085	29.2452	28.761	28.5875	28.8055	-0.487909	1.54226
1932	TBL1XR1	Q9BZK7	F-box-like/WD repeat-containing protein TBL1XR1	3	22	24.6106	25.492	25.4574	24.4854	25.1547	24.7081	-0.403913	0.506526
1933	TBL3	Q12788	Transducin beta-like protein 3	10	45	27.48	26.3435	26.2482	26.6982	26.7982	26.7691	0.0646216	0.0562451
1934	TBRG4	Q969Z0	Protein TBRG4	2	3	24.5521	24.8363	24.9603	24.1831	24.0406	23.4941	-0.876981	1.6505
1935	TCEB1	Q15369	Transcription elongation factor B polypeptide 1	7	87	28.7442	28.8172	28.828	28.7971	28.765	28.8316	0.00146866	0.0149285
1936	TCEB2	Q15370	Transcription elongation factor B polypeptide 2	4	16	26.8785	23.6841	27.3589	27.3013	26.4977	27.1196	0.999008	0.352224
1937	TCEB3	Q14241	Transcription elongation factor B polypeptide 3	21	113	26.3597	24.6491	24.9428	29.8375	29.5938	29.3856	4.28844	2.85388
1938	TCERG1	O14776	Transcription elongation regulator 1	21	136	27.4908	27.5696	27.865	29.631	29.7361	29.6902	2.04394	4.18781
1939	TCOF1	Q13428	Treacle protein	71	771	25.2734	24.0475	24.7654	34.2325	33.9792	34.1105	9.41199	4.88104
1940	TCP1	P17987	T-complex protein 1 subunit alpha	49	567	32.3339	32.942	32.6341	31.9391	32.2623	31.95	-0.58618	1.3373
1941	TDRD3	Q9H7E2	Tudor domain-containing protein 3	17	70	25.9195	22.9907	23.6067	28.8193	28.9116	28.8613	4.69176	2.20388
1942	TECR	Q9NZ01	Very-long-chain enoyl-CoA reductase	7	71	28.323	28.0242	28.1993	28.1741	27.9807	27.9228	-0.156336	0.608074
1943	TES	Q9UGI8	Testin	21	161	29.5724	29.3172	29.6163	29.8286	29.9773	29.9229	0.407646	1.77882
1944	TESK2	Q96S53	Dual specificity testis-specific protein kinase 2	2	13	23.7853	23.599	24.9697	29.3671	29.0993	29.1509	5.08777	3.50712
1945	TEX264	Q9Y6I9	Testis-expressed sequence 264 protein	2	9	23.0544	23.9683	25.117	25.585	25.284	25.5154	1.41489	1.10225
1946	TFAM	Q00059	Transcription factor A, mitochondrial	8	27	28.3358	25.7834	25.3255	25.913	25.2887	25.3671	-0.958652	0.428189
1947	TFCP2	Q12800	Alpha-globin transcription factor CP2	3	14	24.6829	26.0659	23.4134	25.8162	25.3341	25.3725	0.786827	0.430696
1948	TFDP1	Q14186	Transcription factor Dp-1	3	4	24.5742	23.8354	24.0192	25.378	25.49	25.1746	1.20462	2.12823
1949	TFIP11	Q9UBB9	Tuftelin-interacting protein 11	13	44	23.0916	22.3124	25.2354	28.1633	28.2895	28.1473	4.65357	2.22084
1950	THEM6	Q8WUY1	Protein THEM6	3	10	24.9986	25.6291	25.5122	25.2712	24.9975	25.5348	-0.112135	0.170874
1951	THOC2	Q8NI27	THO complex subunit 2	10	36	23.5027	26.3655	26.1592	26.8757	27.1432	27.0861	1.69253	0.849555
1952	THOC3	Q96J01	THO complex subunit 3	5	16	26.2866	26.2165	26.4781	25.3475	25.8191	25.4617	-0.784306	2.07491
1953	THOC6	Q86W42	THO complex subunit 6 homolog	3	7	24.6241	25.6042	24.6598	25.2035	25.0404	23.8692	-0.258334	0.1866
1954	THRAP3	Q9Y2W1	Thyroid hormone receptor-associated protein 3	22	145	28.6193	27.3061	28.1276	30.7686	30.7002	30.8312	2.74901	2.69183
1955	THTPA	Q9BU02	Thiamine-triphosphatase	3	3	24.315	24.6353	24.5842	24.747	24.6499	24.7628	0.208434	0.923634
1956	THUMPD1	Q9NXG2	THUMP domain-containing protein 1	5	34	23.4439	26.9518	27.0779	27.4049	27.296	27.1467	1.45798	0.53935
1957	THUMPD3	Q9BV44	THUMP domain-containing protein 3	5	31	26.6475	27.0228	27.0015	27.0466	27.0595	26.8708	0.101677	0.304054
1958	TIAL1	Q01085	Nucleolysin TIAR	10	69	28.2909	28.2624	28.193	27.7191	27.3082	27.1764	-0.847533	2.15751
1959	TIMM44	O43615	Mitochondrial import inner membrane translocase subunit TIM44	18	146	28.6902	29.1253	29.1285	29.4792	29.0831	29.0839	0.23407	0.523878
1960	TIMM50	Q3ZCQ8	Mitochondrial import inner membrane translocase subunit TIM50	17	170	30.2262	30.5438	30.6074	30.0321	30.2106	30.1564	-0.326103	1.18645
1961	TIPRL	O75663	TIP41-like protein	15	101	24.3564	24.5308	26.4412	29.6829	29.9712	29.6349	4.65355	2.63202
1962	TJP1	Q07157	Tight junction protein ZO-1	47	304	25.31	25.345	25.4563	31.9205	31.7968	31.8622	6.4894	7.45429
1963	TJP2	Q9UDY2	Tight junction protein ZO-2	29	141	25.5389	25.6618	23.9947	30.6274	29.1863	29.4042	4.67418	2.5845
1964	TKT	P29401	Transketolase	14	93	28.1759	28.4414	28.766	28.661	28.6538	28.5196	0.150344	0.353742
1965	TLDC1	Q6P9B6	TLD domain-containing protein 1	2	17	24.8187	25.0304	25.1484	25.5704	25.3876	25.5073	0.489297	1.94348
1966	TLE1	Q04724	Transducin-like enhancer protein 1	3	5	24.304	23.2874	23.4001	25.0097	25.2136	25.1484	1.46006	1.95263
1967	TLE3	Q04726	Transducin-like enhancer protein 3	8	29	27.3364	27.9344	27.7387	27.9448	28.0032	28.0754	0.337979	0.873873
1968	TLN1	Q9Y490	Talin-1	57	387	26.9273	27.5082	27.2618	30.8553	30.9895	30.8265	3.65798	4.50252
1969	TMCO1	Q9UM00	Transmembrane and coiled-coil domain-containing protein 1	4	35	25.6834	26.2056	26.199	26.4141	26.2707	26.7362	0.444363	0.940148
1970	TMED10	P49755	Transmembrane emp24 domain-containing protein 10	2	16	25.2757	25.1535	25.8609	24.4058	24.655	24.2783	-0.983645	1.79936
1971	TMEM209	Q96SK2	Transmembrane protein 209	3	10	23.9213	23.9251	24.8406	25.1325	25.3187	25.5806	1.11494	1.54628
1972	TMEM263	Q8WUH6	Transmembrane protein 263	4	17	25.7591	25.8712	26.305	26.147	26.0718	25.826	0.0365105	0.0660654
1973	TMEM57	Q8N5G2	Macoilin	2	10	23.8238	22.482	23.6446	25.0433	24.9023	25.0158	1.67033	1.77439
1974	TMF1	P82094	TATA element modulatory factor	3	11	23.811	24.6206	24.9337	25.6247	25.632	25.8071	1.23282	1.6539
1975	TMOD3	Q9NYL9	Tropomodulin-3	7	27	25.6746	23.7486	24.7021	26.7309	26.4947	26.5538	1.88471	1.54914
1976	TMPO	P42167	Lamina-associated polypeptide 2, isoforms beta/gamma;Thymopoietin;Thymopentin	27	144	26.2683	25.6759	26.906	30.8129	30.6432	30.6444	4.41675	3.59781
1977	TMPO	P42166	Lamina-associated polypeptide 2, isoform alpha;Thymopoietin;Thymopentin	28	213	29.05	29.0147	29.5558	31.78	31.4452	31.6098	2.40484	3.56398
1978	TMX1	Q9H3N1	Thioredoxin-related transmembrane protein 1	2	12	25.6975	26.0724	26.0205	26.0119	25.8718	25.8424	-0.0214297	0.0577082
1979	TMX2	Q9Y320	Thioredoxin-related transmembrane protein 2	2	11	23.8128	26.1708	25.34	26.211	25.7167	25.821	0.808366	0.499642
1980	TMX3	Q96JJ7	Protein disulfide-isomerase TMX3	2	4	23.4866	24.4482	23.1707	23.0236	23.6535	23.621	-0.269129	0.244204
1981	TNIK	Q9UKE5	TRAF2 and NCK-interacting protein kinase	16	82	24.5688	25.3698	25.271	29.6576	29.3136	29.346	4.3692	4.03771
1982	TNIP1	Q15025	TNFAIP3-interacting protein 1	5	20	23.8793	22.3608	23.9342	26.7301	26.6814	27.0694	3.43556	2.53527
1983	TNKS1BP1	Q9C0C2	182 kDa tankyrase-1-binding protein	19	87	23.6434	24.1257	23.6545	28.7592	28.4282	28.7823	4.8487	4.80159
1984	TNRC6A	Q8NDV7	Trinucleotide repeat-containing gene 6A protein	6	14	24.8502	22.29	25.0394	25.4565	25.3785	25.7883	1.48121	0.760818
1985	TNRC6B	Q9UPQ9	Trinucleotide repeat-containing gene 6B protein	19	97	24.9227	24.6814	24.6428	28.8914	28.9517	28.975	4.19038	5.87511
1986	TOMM22	Q9NS69	Mitochondrial import receptor subunit TOM22 homolog	3	30	24.9908	25.3022	24.7246	26.3348	26.3034	26.2116	1.27738	2.7658
1987	TOMM34	Q15785	Mitochondrial import receptor subunit TOM34	9	65	27.6065	27.7393	27.7003	27.5214	27.6484	27.6027	-0.0911916	0.775833
1988	TOP1	P11387	DNA topoisomerase 1	15	36	29.2718	24.1673	24.1116	23.8807	24.8016	24.0273	-1.61368	0.392682
1989	TOP2A	P11388	DNA topoisomerase 2-alpha	40	78	31.1756	26.9969	24.9633	23.889	24.4438	24.5926	-3.40349	0.859447
1990	TOP2B	Q02880	DNA topoisomerase 2-beta	11	9	27.2232	23.1485	22.5515	23.4634	23.7488	24.9975	-0.237825	0.0531218
1991	TOPBP1	Q92547	DNA topoisomerase 2-binding protein 1	3	5	24.7841	24.2405	23.5898	24.2606	24.3127	24.2794	0.0794341	0.0812019
1992	TOR1AIP1	Q5JTV8	Torsin-1A-interacting protein 1	8	35	25.8402	26.1569	26.4737	26.993	26.6514	26.8912	0.688278	1.52077
1993	TOX4	O94842	TOX high mobility group box family member 4	13	180	24.8173	23.2586	23.1092	31.2515	31.4947	31.3542	7.63845	3.80511
1994	TP53	P04637	Cellular tumor antigen p53	11	148	29.2617	29.2101	29.568	29.5109	29.4249	29.3087	0.0681922	0.209398
1995	TP53BP2	Q13625	Apoptosis-stimulating of p53 protein 2	18	70	25.7021	25.9203	27.1284	28.6798	27.7853	28.8398	2.18474	1.77779
1996	TP53RK	Q96S44	TP53-regulating kinase	2	17	27.1216	22.8437	23.5981	26.3468	26.4644	26.5843	1.94404	0.667887
1997	TPD52	P55327	Tumor protein D52	3	11	25.1154	23.5269	24.0361	25.7471	26.0416	26.3574	1.82257	1.65925
[truncated: 216 more rows]
