# Supplementary material for: EDF1 coordinates cellular responses to ribosome collisions
Source: eLife. 2020 Aug 3;9:e58828. doi: 10.7554/eLife.58828 (PMC7486125; doi:10.7554/eLife.58828)
Supplement: Figure 6—source data 1. — 16plex TMT-MS3 analysis of HEK293 Flp-In T-REx cells (WT vs ΔEDF1). [file elife-58828-fig6-data1.xlsx]

## Sheet: Fig6-source-data-1
Sinha N. et al. (2020)
Figure 6-source data 1: Related to Figure 6 and Figure6-figure supplement 1
Light polysome dataset: See "Light polysome" sheet
Heavy polysome dataset: See "Heavy polysome" sheet

## Sheet: Light polysome
Pooled sucrose gradient fractions (light polysome) analysis with or without low emetine treatment. 16plex TMT-MS3 analysis of HEK293 Flip-in cells (WT vs EDF1 KO). Analysed with Comet (2018.01 rev. 2)
Related to Fig6B-6C and Fig6-figure supplement1A-1D
				Annotations			TMT intensity (sum signal to noise)																	Ratio to (average WT_UT)																	Replicate ratio of EL/UT
Rank	UniProt ID	Gene Symbol	Description	Ribosome_Full_List	Ribosome_Detailed	Quantified peptides	WT_UT01_sn sum	WT_EL01_sn sum	EDF1_UT01_sn sum	EDF1_EL01_sn sum	WT_UT02_sn sum	WT_EL02_sn sum	EDF1_UT02_sn sum	EDF1_EL02_sn sum	WT_UT03_sn sum	WT_EL03_sn sum	EDF1_UT03_sn sum	EDF1_EL03_sn sum	WT_UT04_sn sum	WT_EL04_sn sum	EDF1_UT04_sn sum	EDF1_EL04_sn sum		WT_UT01_ratio	WT_EL01_ratio	EDF1_UT01_ratio	EDF1_EL01_ratio	WT_UT02_ratio	WT_EL02_ratio	EDF1_UT02_ratio	EDF1_EL02_ratio	WT_UT03_ratio	WT_EL03_ratio	EDF1_UT03_ratio	EDF1_EL03_ratio	WT_UT04_ratio	WT_EL04_ratio	EDF1_UT04_ratio	EDF1_EL04_ratio		WT_01_ratio	WT_02_ratio	WT_03_ratio	WT_04_ratio	EDF1_01_ratio	EDF1_02_ratio	EDF1_03_ratio	EDF1_04_ratio
1	P01023	A2M	Alpha-2-macroglobulin OS=Homo sapiens OX=9606 GN=A2M PE=1 SV=3			3	261.158	203.301	554.185	630.186	439.971	601.368	726.362	657.741	506.234	491.239	538.451	777.137	675.379	483.656	540.713	735.363		0.554846	0.431925	1.1774	1.33887	0.934745	1.27764	1.5432	1.39741	1.07552	1.04367	1.14397	1.65107	1.43488	1.02756	1.14878	1.56232		0.77846	1.36684	0.970379	0.716125	1.13714	0.905528	1.44328	1.35999
2	Q9NRG9	AAAS	Aladin OS=Homo sapiens OX=9606 GN=AAAS PE=1 SV=1			5	218.245	178.911	260.821	202.312	700.944	734.016	519.58	494.156	804.745	698.1	647.155	681.568	785.01	581.853	809.86	677.874		0.347947	0.285237	0.415826	0.322545	1.11751	1.17024	0.828364	0.787831	1.283	1.11298	1.03176	1.08662	1.25154	0.927646	1.29116	1.08073		0.819771	1.04718	0.86748	0.741205	0.775674	0.951068	1.05318	0.837026
3	Q6PD74	AAGAB	Alpha- and gamma-adaptin-binding protein p34 OS=Homo sapiens OX=9606 GN=AAGAB PE=1 SV=1			2	164.023	118.713	250.673	215.202	710.699	683.149	597.556	592.171	747.864	606.254	744.292	870.241	775.833	614.845	923.349	805.737		0.273552	0.197985	0.418064	0.358906	1.18528	1.13933	0.996583	0.987602	1.24726	1.01109	1.2413	1.45136	1.29391	1.02542	1.53993	1.34378		0.723758	0.961235	0.810647	0.792497	0.858497	0.990988	1.16922	0.872625
4	Q2M2I8	AAK1	AP2-associated protein kinase 1 OS=Homo sapiens OX=9606 GN=AAK1 PE=1 SV=3			6	173.313	166.626	234.807	201.439	607.857	645.182	469.142	444.638	602.733	560.375	539.225	652.412	732.091	541.655	657.94	624.483		0.327625	0.314984	0.443871	0.380793	1.14907	1.21963	0.886849	0.840528	1.13939	1.05931	1.01933	1.2333	1.38392	1.02393	1.24375	1.1805		0.961417	1.0614	0.929723	0.739874	0.857892	0.947768	1.20991	0.949149
5	Q9H7C9	AAMDC	Mth938 domain-containing protein OS=Homo sapiens OX=9606 GN=AAMDC PE=1 SV=1			1	190.418	162.093	353.831	262.694	331.672	400.998	506.801	348.823	622.147	380.101	606.62	1095.72	477.036	366.517	450.471	502.109		0.469799	0.399915	0.872971	0.648118	0.8183	0.989341	1.25038	0.860615	1.53496	0.937784	1.49665	2.70336	1.17694	0.90427	1.1114	1.2388		0.851248	1.20902	0.61095	0.768321	0.742428	0.688284	1.80627	1.11463
6	Q13685	AAMP	Angio-associated migratory cell protein OS=Homo sapiens OX=9606 GN=AAMP PE=1 SV=2			4	74.2308	58.3978	105.023	80.2466	175.331	202.295	175.376	174.837	184.611	160.687	223.966	238.451	242.525	182.091	288.553	248.745		0.438783	0.345193	0.620797	0.474342	1.03639	1.19578	1.03666	1.03347	1.09125	0.94983	1.32388	1.4095	1.43358	1.07635	1.70565	1.47035		0.786706	1.15379	0.870409	0.750813	0.764086	0.996927	1.06467	0.862043
7	Q9Y312	AAR2	Protein AAR2 homolog OS=Homo sapiens OX=9606 GN=AAR2 PE=1 SV=2			5	310.993	250.515	463.753	376.515	1047.79	1129.3	945.191	954.078	1052.86	942.493	1182.18	1315.51	1127.37	894.125	1446.57	1286.33		0.351503	0.283147	0.524161	0.425559	1.18427	1.2764	1.06831	1.07835	1.19	1.06526	1.33617	1.48687	1.27422	1.01059	1.635	1.45389		0.805533	1.07779	0.895174	0.793107	0.811887	1.0094	1.11278	0.889228
8	P49588	AARS	Alanine--tRNA ligase, cytoplasmic OS=Homo sapiens OX=9606 GN=AARS PE=1 SV=2			11	365.598	384.799	609.436	591.219	981.073	1269.23	1167.26	1082.08	1396.4	1164.28	1446.67	1979.43	1096.26	935.009	1280.28	1291.97		0.380898	0.400902	0.63494	0.61596	1.02213	1.32234	1.21611	1.12736	1.45484	1.213	1.50721	2.06227	1.14214	0.974137	1.33386	1.34604		1.05252	1.29372	0.833773	0.852908	0.970108	0.927026	1.36827	1.00913
9	Q5JTZ9	AARS2	Alanine--tRNA ligase, mitochondrial OS=Homo sapiens OX=9606 GN=AARS2 PE=1 SV=1			9	203.086	182.948	490.044	343.68	951.462	943.881	1043.72	1055.83	1068.76	897.654	1394.65	1474.51	1173.95	847.999	1647.9	1290.15		0.239118	0.215407	0.576988	0.404656	1.12027	1.11134	1.2289	1.24316	1.25838	1.05692	1.64209	1.73612	1.38223	0.998451	1.94027	1.51905		0.90084	0.992032	0.839902	0.722347	0.701325	1.0116	1.05726	0.782906
10	Q9BTE6	AARSD1	Alanyl-tRNA editing protein Aarsd1 OS=Homo sapiens OX=9606 GN=AARSD1 PE=1 SV=2			7	220.321	186.48	264.871	228.838	682.696	723.329	583.77	613.063	775.54	675.461	781.968	840.395	779.427	632.737	965.07	789.642		0.358539	0.303468	0.431038	0.372399	1.11099	1.17711	0.949998	0.997668	1.26207	1.09921	1.27254	1.36762	1.2684	1.02968	1.57051	1.28502		0.846401	1.05952	0.870956	0.811798	0.86396	1.05018	1.07472	0.818223
11	Q4L235	AASDH	Beta-alanine-activating enzyme OS=Homo sapiens OX=9606 GN=AASDH PE=1 SV=3			2	153.852	138.864	144.294	124.783	511.664	574.977	328.18	374.525	585.575	567.262	392.701	556.548	513.72	384.66	471.11	532.467		0.34871	0.31474	0.327047	0.282825	1.1597	1.3032	0.74383	0.848873	1.32722	1.28572	0.890069	1.26143	1.16436	0.871844	1.06779	1.20685		0.902582	1.12374	0.968726	0.748774	0.864783	1.14122	1.41723	1.13024
12	Q9NRN7	AASDHPPT	L-aminoadipate-semialdehyde dehydrogenase-phosphopantetheinyl transferase OS=Homo sapiens OX=9606 GN=AASDHPPT PE=1 SV=2			2	232.768	201.944	533.277	377.212	461.658	541.601	845.578	530.75	766.414	471.453	956.523	1474.33	682.9	496.914	809.386	702.824		0.434321	0.376807	0.99504	0.703839	0.861407	1.01057	1.57776	0.990325	1.43005	0.879683	1.78477	2.75095	1.27422	0.927191	1.51023	1.3114		0.867576	1.17316	0.615141	0.727653	0.707347	0.627677	1.54134	0.868342
13	Q9UDR5	AASS	Alpha-aminoadipic semialdehyde synthase, mitochondrial OS=Homo sapiens OX=9606 GN=AASS PE=1 SV=1			4	207.448	173.443	304.812	290.643	663.776	735.75	719.2	581.536	734.146	531.227	741.694	944.469	789.952	614.726	849.749	769.585		0.346422	0.289636	0.509012	0.485351	1.10845	1.22864	1.20101	0.97112	1.22597	0.887107	1.23857	1.57719	1.31916	1.02654	1.41901	1.28515		0.836079	1.10843	0.723599	0.778181	0.953516	0.808587	1.27339	0.905662
14	Q6ZMQ8	AATK	Serine/threonine-protein kinase LMTK1 OS=Homo sapiens OX=9606 GN=AATK PE=1 SV=2			1	19.5533	19.8852	21.5153	18.9565	48.2707	53.1956	41.9337	40.213	54.7112	57.7458	48.2104	49.4155	63.7643	45.1877	43.9939	46.9585		0.419825	0.426951	0.461951	0.407011	1.03641	1.14215	0.90035	0.863405	1.17469	1.23985	1.03512	1.06099	1.36907	0.970216	0.944584	1.00824		1.01697	1.10203	1.05547	0.708668	0.881071	0.958966	1.025	1.06739
15	Q9BZC7	ABCA2	ATP-binding cassette sub-family A member 2 OS=Homo sapiens OX=9606 GN=ABCA2 PE=1 SV=4			2	42.5826	31.2846	71.4396	65.7156	108.783	132.21	144.407	118.616	243.956	152.422	182.603	251.864	161.365	117.128	173.965	182.513		0.305972	0.224791	0.51332	0.472191	0.781646	0.949978	1.03762	0.8523	1.75291	1.09521	1.31207	1.80974	1.15947	0.841608	1.25	1.31142		0.73468	1.21536	0.624793	0.725858	0.919876	0.821401	1.3793	1.04914
16	Q99758	ABCA3	ATP-binding cassette sub-family A member 3 OS=Homo sapiens OX=9606 GN=ABCA3 PE=1 SV=2			11	155.691	115.98	404.125	355.605	430.114	502.41	661.319	528.561	794.151	528.81	768.028	1223.62	689.546	436.065	812.023	964.471		0.300925	0.22417	0.781106	0.687325	0.831338	0.971074	1.27822	1.02162	1.53496	1.0221	1.48447	2.36505	1.33278	0.84284	1.5695	1.86416		0.744937	1.16809	0.665881	0.632394	0.879938	0.799253	1.5932	1.18774
17	Q8WWZ7	ABCA5	ATP-binding cassette sub-family A member 5 OS=Homo sapiens OX=9606 GN=ABCA5 PE=2 SV=2			1	5.84373	3.436	19.9779	19.807	24.0577	25.5296	33.8501	29.2888	34.5096	25.6218	32.7083	62.4424	38.9645	28.2494	42.1103	37.5032		0.226117	0.132952	0.773022	0.76641	0.930886	0.987839	1.30979	1.1333	1.33531	0.991407	1.26561	2.41614	1.50769	1.09308	1.62941	1.45114		0.587981	1.06118	0.742454	0.725004	0.991446	0.86525	1.90907	0.890594
18	P08183	ABCB1	Multidrug resistance protein 1 OS=Homo sapiens OX=9606 GN=ABCB1 PE=1 SV=3			12	289.806	183.237	833.256	1077.61	653.159	1182.13	1820.61	930.235	2703.81	1418.91	2037.9	3686.94	3399.89	2316.54	1990.49	2660.68		0.164507	0.104013	0.472993	0.611699	0.370762	0.671029	1.03346	0.528043	1.5348	0.805436	1.1568	2.09287	1.92993	1.31497	1.12989	1.51032		0.632275	1.80987	0.524782	0.681357	1.29325	0.510947	1.80919	1.3367
19	Q9NRK6	ABCB10	ATP-binding cassette sub-family B member 10, mitochondrial OS=Homo sapiens OX=9606 GN=ABCB10 PE=1 SV=2			7	123.312	85.3058	283.248	344.452	352.159	515.873	905.369	465.8	1159.2	420.524	1001.23	2602.54	1261.8	782.818	873.831	1216.23		0.170293	0.117807	0.391163	0.475685	0.486328	0.712416	1.25031	0.643266	1.60084	0.58074	1.38269	3.59408	1.74253	1.08106	1.20675	1.6796		0.691788	1.46489	0.362771	0.620398	1.21608	0.514486	2.59934	1.39184
20	O95342	ABCB11	Bile salt export pump OS=Homo sapiens OX=9606 GN=ABCB11 PE=1 SV=2			1	31.6717	18.1631	93.5599	114.436	63.1379	120.944	167.037	92.8568	308.633	158.752	185.286	373.457	390.995	240.507	190.425	265.985		0.159467	0.0914514	0.471075	0.576186	0.3179	0.608954	0.841033	0.467535	1.55397	0.799318	0.932917	1.88036	1.96866	1.21095	0.958791	1.33924		0.57348	1.91555	0.514371	0.615115	1.22313	0.555906	2.01557	1.3968
21	Q9NP58	ABCB6	ATP-binding cassette sub-family B member 6, mitochondrial OS=Homo sapiens OX=9606 GN=ABCB6 PE=1 SV=1			5	35.6805	29.02	104.125	117.443	125.63	161.579	236.743	137.885	444.334	210.512	287.394	629.869	397.047	205.81	269.832	364.517		0.142339	0.115768	0.415382	0.468511	0.501171	0.644581	0.94443	0.55006	1.77257	0.839788	1.14649	2.51271	1.58392	0.82103	1.07643	1.45415		0.813329	1.28615	0.47377	0.518352	1.1279	0.582425	2.19166	1.3509
22	O75027	ABCB7	ATP-binding cassette sub-family B member 7, mitochondrial OS=Homo sapiens OX=9606 GN=ABCB7 PE=1 SV=2			5	84.7414	61.9355	173.107	166.837	267.305	383.98	730.82	301.031	680.206	325.942	827.476	1451.27	924.739	627.708	596.826	809.421		0.173208	0.126593	0.353823	0.341007	0.546359	0.784837	1.49376	0.615293	1.39031	0.66621	1.69132	2.96633	1.89012	1.28301	1.21988	1.65442		0.730877	1.43649	0.479181	0.678795	0.96378	0.411909	1.75385	1.35621
23	Q9NUT2	ABCB8	ATP-binding cassette sub-family B member 8, mitochondrial OS=Homo sapiens OX=9606 GN=ABCB8 PE=1 SV=3			3	21.5617	16.4837	54.987	62.8718	114.572	148.622	200.971	104.378	298.233	149.842	237.428	417.077	263.348	185.374	210.164	240.459		0.123613	0.0945011	0.315241	0.360444	0.656842	0.85205	1.15217	0.598399	1.70977	0.859045	1.36118	2.3911	1.50977	1.06275	1.20487	1.37855		0.76449	1.29719	0.502433	0.703913	1.14339	0.519368	1.75665	1.14415
24	P33527	ABCC1	Multidrug resistance-associated protein 1 OS=Homo sapiens OX=9606 GN=ABCC1 PE=1 SV=3			9	74.911	50.3111	250.754	485.943	230.637	352.598	654.691	302.862	1226.38	800.666	992.435	1927	1212.82	864.421	894.892	1206.32		0.10917	0.0733198	0.365431	0.708179	0.336114	0.513851	0.9541	0.441369	1.78724	1.16683	1.4463	2.80827	1.76748	1.25975	1.30415	1.758		0.671612	1.5288	0.652869	0.712736	1.93793	0.462603	1.94169	1.34801
25	Q5T3U5	ABCC10	Multidrug resistance-associated protein 7 OS=Homo sapiens OX=9606 GN=ABCC10 PE=1 SV=1			3	19.8002	16.6771	64.7715	52.5987	53.9563	65.4218	96.9817	68.9517	157.69	80.2321	111.964	247.776	160.985	78.9253	115.202	155.449		0.201821	0.169987	0.660207	0.536131	0.549969	0.666835	0.988521	0.702815	1.60731	0.817795	1.14123	2.52555	1.6409	0.804475	1.17424	1.58447		0.842269	1.2125	0.508796	0.490265	0.812065	0.710976	2.213	1.34936
26	O15439	ABCC4	Multidrug resistance-associated protein 4 OS=Homo sapiens OX=9606 GN=ABCC4 PE=1 SV=3			10	188.824	124.536	399.632	659.202	403.662	837.518	1090.93	593.801	2127.61	1295.66	1421.7	2739.15	2053.72	1614.95	1298.36	1722.91		0.158216	0.104349	0.334853	0.552348	0.33823	0.70176	0.914095	0.497548	1.78273	1.08564	1.19125	2.29515	1.72082	1.35317	1.0879	1.44363		0.659535	2.0748	0.608974	0.786354	1.64952	0.544307	1.92667	1.32699
27	O15440	ABCC5	Multidrug resistance-associated protein 5 OS=Homo sapiens OX=9606 GN=ABCC5 PE=1 SV=2			5	92.1499	119.964	718.302	786.701	172.96	280.137	605.688	349.708	733.324	436.732	735.213	1493.35	917.702	584.127	826.87	1107.5		0.192366	0.250429	1.49948	1.64227	0.36106	0.584796	1.26439	0.730028	1.53084	0.911693	1.53478	3.11742	1.91573	1.21939	1.72612	2.31194		1.30184	1.61966	0.595551	0.636511	1.09522	0.577373	2.03118	1.33939
28	P33897	ABCD1	ATP-binding cassette sub-family D member 1 OS=Homo sapiens OX=9606 GN=ABCD1 PE=1 SV=2			1	16.1568	12.9548	30.39	35.4703	35.165	49.6043	52.5763	44.8424	45.1147	36.3844	41.0315	76.2485	67.7108	49.0102	50.3501	75.3486		0.393715	0.315687	0.740554	0.864353	0.856913	1.20878	1.2812	1.09274	1.09937	0.886628	0.99987	1.85805	1.65	1.1943	1.22695	1.83612		0.801817	1.41062	0.806487	0.723817	1.16717	0.852901	1.85829	1.49649
29	P28288	ABCD3	ATP-binding cassette sub-family D member 3 OS=Homo sapiens OX=9606 GN=ABCD3 PE=1 SV=1			12	500.315	680.856	1324.17	1736.8	813.358	1465.19	1502.66	1280.54	946.746	760.835	1008.77	2250.48	2177.38	1794.25	1562.74	2055.93		0.450958	0.613688	1.19354	1.56546	0.733118	1.32065	1.35442	1.15421	0.853347	0.685777	0.909253	2.02847	1.96258	1.61724	1.40857	1.85311		1.36085	1.80141	0.803632	0.824041	1.31161	0.852182	2.23091	1.31559
30	O14678	ABCD4	ATP-binding cassette sub-family D member 4 OS=Homo sapiens OX=9606 GN=ABCD4 PE=1 SV=1			1	5.51733	3.98847	16.297	9.73163	11.3693	14.7974	19.2271	12.2703	22.36	10.1394	18.449	38.728	21.2626	16.5692	20.8524	28.3047		0.364727	0.26366	1.07732	0.643315	0.751575	0.978191	1.27102	0.811136	1.47812	0.670271	1.21958	2.56014	1.40558	1.09532	1.37846	1.8711		0.722899	1.30152	0.453462	0.779265	0.597142	0.638177	2.09919	1.35738
31	P61221	ABCE1	ATP-binding cassette sub-family E member 1 OS=Homo sapiens OX=9606 GN=ABCE1 PE=1 SV=1			13	1033.8	801.809	1142.75	857.984	2451.69	2914.44	1976.23	1860.58	3009.43	2549.97	1988.8	2597.23	2764.31	2067.28	2315.96	2394.71		0.446603	0.346383	0.49367	0.37065	1.05913	1.25904	0.853734	0.803773	1.30008	1.10159	0.859164	1.12201	1.19419	0.893068	1.0005	1.03452		0.775594	1.18875	0.847327	0.747847	0.750806	0.941479	1.30593	1.034
32	Q8NE71	ABCF1	ATP-binding cassette sub-family F member 1 OS=Homo sapiens OX=9606 GN=ABCF1 PE=1 SV=2			15	521.052	539.747	662.524	452.986	1228.11	3563.61	1007.55	1577.96	2800.32	4180.62	1497.25	3140.87	2097.2	3040.36	1715.85	2904.95		0.313571	0.324822	0.39871	0.272609	0.739082	2.14459	0.606348	0.949623	1.68524	2.51591	0.901051	1.89019	1.2621	1.8297	1.03261	1.74821		1.03588	2.9017	1.49291	1.44972	0.683728	1.56614	2.09776	1.69301
33	Q9UG63	ABCF2	ATP-binding cassette sub-family F member 2 OS=Homo sapiens OX=9606 GN=ABCF2 PE=1 SV=2			17	2473.96	2389.96	2924.13	2804.89	4418.05	6072.55	4476.12	4130.03	4825.21	4325.16	4325.32	5400.83	7038.19	5511.65	5197.6	5403.7		0.527626	0.509711	0.623634	0.598204	0.942245	1.2951	0.95463	0.880819	1.02908	0.922435	0.922469	1.15184	1.50105	1.17548	1.1085	1.15246		0.966046	1.37449	0.896367	0.783106	0.959222	0.922681	1.24865	1.03965
34	Q9NUQ8	ABCF3	ATP-binding cassette sub-family F member 3 OS=Homo sapiens OX=9606 GN=ABCF3 PE=1 SV=2			4	134.319	130.861	305.781	250.267	385.908	411.846	563.895	430.787	419.408	314.555	583.811	695.241	509.535	363.676	633.577	563.646		0.370747	0.361203	0.844017	0.690787	1.06518	1.13678	1.55646	1.18906	1.15765	0.868235	1.61144	1.919	1.40642	1.00382	1.7488	1.55578		0.974255	1.06721	0.749998	0.713741	0.818452	0.763949	1.19087	0.889625
35	Q9UNQ0	ABCG2	ATP-binding cassette sub-family G member 2 OS=Homo sapiens OX=9606 GN=ABCG2 PE=1 SV=3			2	21.4434	11.1812	15.2527	20.3375	57.2881	92.9799	45.8878	38.2668	167.896	123.261	56.5283	104.807	138.063	105.385	52.0376	84.0609		0.222968	0.116262	0.158597	0.211469	0.59568	0.966802	0.47714	0.397897	1.74578	1.28166	0.58778	1.08978	1.43557	1.09579	0.541085	0.874063		0.521429	1.62302	0.734151	0.763311	1.33337	0.833921	1.85406	1.61539
36	Q9NUJ1	ABHD10	Mycophenolic acid acyl-glucuronide esterase, mitochondrial OS=Homo sapiens OX=9606 GN=ABHD10 PE=1 SV=1			3	82.4734	90.1272	125.383	105.509	237.185	257.837	277.939	209.517	438.178	270.766	343.288	573.133	248.968	235.518	333.464	300.259		0.327664	0.358072	0.498142	0.419184	0.942328	1.02438	1.10424	0.832404	1.74087	1.07574	1.36387	2.27704	0.989141	0.935705	1.32484	1.19292		1.0928	1.08707	0.617936	0.945977	0.841494	0.753824	1.66954	0.900424
37	Q8N2K0	ABHD12	Monoacylglycerol lipase ABHD12 OS=Homo sapiens OX=9606 GN=ABHD12 PE=1 SV=2			4	146.944	123.185	174.558	155.641	576.968	603.683	510.973	501.23	719.692	585.255	616.018	784.386	662.778	557.509	739.267	698.706		0.279045	0.233927	0.331484	0.295561	1.09566	1.14639	0.970333	0.951831	1.36669	1.11139	1.16981	1.48954	1.25861	1.0587	1.40386	1.32684		0.838313	1.0463	0.813202	0.84117	0.891629	0.980932	1.27332	0.945133
38	Q96IU4	ABHD14B	Protein ABHD14B OS=Homo sapiens OX=9606 GN=ABHD14B PE=1 SV=1			3	48.9505	28.9485	67.7855	55.2384	215.777	204.514	184.788	223.847	337.375	222.552	311.009	317.117	236.991	184.806	380.451	263.821		0.233349	0.137999	0.323137	0.263324	1.02862	0.974928	0.880893	1.06709	1.60828	1.06092	1.4826	1.51171	1.12975	0.880979	1.81363	1.25765		0.591383	0.947803	0.659658	0.779802	0.8149	1.21137	1.01964	0.693443
39	Q6UXT9	ABHD15	Protein ABHD15 OS=Homo sapiens OX=9606 GN=ABHD15 PE=1 SV=2			1	11.6936	7.66144	12.5019	11.5002	45.2052	50.4173	31.8655	30.2975	53.4121	43.2321	31.9511	50.3814	46.3065	43.4255	37.6988	38.4632		0.298654	0.195673	0.319298	0.293714	1.15454	1.28766	0.813843	0.773797	1.36414	1.10415	0.816029	1.28674	1.18267	1.10908	0.962825	0.982348		0.655182	1.1153	0.809406	0.937784	0.919876	0.950793	1.57683	1.02028
40	O95870	ABHD16A	Protein ABHD16A OS=Homo sapiens OX=9606 GN=ABHD16A PE=1 SV=3			5	94.6891	79.1557	149.986	140.853	285.817	302.039	373.407	264.526	328.893	229.516	405.871	553.41	478.171	323.866	437.805	443.594		0.318934	0.266614	0.505186	0.474424	0.962695	1.01733	1.25772	0.890982	1.10778	0.773061	1.36706	1.86401	1.61059	1.09085	1.47462	1.49412		0.835954	1.05676	0.697844	0.677302	0.939108	0.708412	1.36351	1.01322
41	Q96GS6	ABHD17A	Alpha/beta hydrolase domain-containing protein 17A OS=Homo sapiens OX=9606 GN=ABHD17A PE=1 SV=1			1	51.8313	93.2876	207.147	88.5732	91.5141	162.994	140.86	94.2137	150.328	87.8145	165.088	220.264	139.872	117.485	164.092	176.044		0.478209	0.860695	1.91119	0.817199	0.844332	1.50382	1.29961	0.86924	1.38696	0.810199	1.52314	2.03221	1.29049	1.08395	1.51395	1.62423		1.79983	1.78108	0.584153	0.839947	0.427586	0.668846	1.33422	1.07284
42	Q6PCB6	ABHD17C	Alpha/beta hydrolase domain-containing protein 17C OS=Homo sapiens OX=9606 GN=ABHD17C PE=1 SV=2			1	9.80126	8.07424	42.3583	32.8694	24.1456	36.4225	47.5656	42.0588	30.3593	28.8705	43.7898	66.843	39.4216	30.0491	62.9335	57.1852		0.377961	0.311363	1.63344	1.26753	0.931114	1.40454	1.83425	1.62189	1.17073	1.11332	1.68864	2.57763	1.52019	1.15877	2.42687	2.2052		0.823796	1.50845	0.950961	0.76225	0.775985	0.884227	1.52645	0.908661
43	Q0P651	ABHD18	Protein ABHD18 OS=Homo sapiens OX=9606 GN=ABHD18 PE=2 SV=1			1	56.0627	47.7632	103.626	92.3034	150.694	165.397	207.112	159.795	154.92	151.343	230.854	298.578	179.992	138.345	229.959	240.43		0.414	0.352712	0.765235	0.681623	1.11281	1.22139	1.52944	1.18002	1.14402	1.11761	1.70476	2.20488	1.32917	1.02162	1.69815	1.77548		0.85196	1.09757	0.976911	0.768617	0.890736	0.771539	1.29336	1.04553
44	Q8WTS1	ABHD5	1-acylglycerol-3-phosphate O-acyltransferase ABHD5 OS=Homo sapiens OX=9606 GN=ABHD5 PE=1 SV=1			1	10.167	10.4017	27.5641	19.0482	37.9985	34.0724	31.6938	32.828	37.7603	35.4575	47.1511	47.5774	41.5315	26.9157	45.5123	42.7789		0.319072	0.326437	0.865046	0.597791	1.19251	1.0693	0.994648	1.03024	1.18503	1.11276	1.47975	1.49312	1.30339	0.844697	1.42832	1.34253		1.02308	0.896678	0.939015	0.648079	0.691051	1.03579	1.00904	0.939942
45	Q9BV23	ABHD6	Monoacylglycerol lipase ABHD6 OS=Homo sapiens OX=9606 GN=ABHD6 PE=1 SV=1			3	254.758	232.382	284.314	272.644	804.579	969.375	664.235	641.933	1066.78	975.375	767.226	1068.87	926.288	772.198	944.432	902.486		0.333846	0.304523	0.372577	0.357284	1.05435	1.27031	0.870442	0.841216	1.39795	1.27817	1.00541	1.40069	1.21385	1.01192	1.23762	1.18266		0.912168	1.20482	0.914317	0.833648	0.958954	0.966425	1.39316	0.955586
46	Q8IZP0	ABI1	Abl interactor 1 OS=Homo sapiens OX=9606 GN=ABI1 PE=1 SV=4			1	11.3215	12.2805	10.2618	8.03385	43.5582	38.7142	31.7198	28.269	50.2816	30.1034	30.2489	30.9781	47.9934	41.2967	45.3696	35.8586		0.295688	0.320735	0.268011	0.209823	1.13763	1.01111	0.828438	0.738312	1.31322	0.786222	0.790022	0.809067	1.25346	1.07856	1.18494	0.936533		1.08471	0.888792	0.598696	0.860466	0.782889	0.89121	1.02411	0.790366
47	Q9NYB9	ABI2	Abl interactor 2 OS=Homo sapiens OX=9606 GN=ABI2 PE=1 SV=1			3	60.5039	52.4932	71.1958	66.6463	211.658	208.772	159.872	174.118	220.9	181.519	173.517	206.298	232.172	182.023	255.981	214.168		0.333707	0.289524	0.392678	0.367585	1.16739	1.15147	0.881768	0.960341	1.21837	1.00116	0.957026	1.13783	1.28054	1.00394	1.41185	1.18124		0.8676	0.986365	0.821725	0.784001	0.936099	1.08911	1.18892	0.836656
48	P00519	ABL1	Tyrosine-protein kinase ABL1 OS=Homo sapiens OX=9606 GN=ABL1 PE=1 SV=4			1	34.6796	29.3013	49.6377	36.6237	83.6614	98.5708	88.9692	84.4806	115.154	88.2292	113.87	124.237	131.648	100.885	126.121	110.593		0.379902	0.320984	0.543762	0.401198	0.916478	1.0798	0.974623	0.925452	1.26147	0.966517	1.2474	1.36097	1.44215	1.10516	1.38161	1.2115		0.844915	1.17821	0.766184	0.766324	0.73782	0.949549	1.09104	0.87688
49	P42684	ABL2	Tyrosine-protein kinase ABL2 OS=Homo sapiens OX=9606 GN=ABL2 PE=1 SV=1			2	38.6142	43.554	52.4402	44.1753	157.176	141.988	110.914	100.942	176.851	144.876	169.47	150.521	177.652	125.917	208.114	148.657		0.280681	0.316588	0.38118	0.321104	1.14249	1.03209	0.806217	0.733732	1.2855	1.05308	1.23185	1.09411	1.29133	0.915272	1.51275	1.08057		1.12793	0.903369	0.819198	0.708785	0.842394	0.910093	0.888187	0.714306
50	O14639	ABLIM1	Actin-binding LIM protein 1 OS=Homo sapiens OX=9606 GN=ABLIM1 PE=1 SV=3			5	139.996	144.888	121.521	111.276	564.693	696.773	310.99	336.809	602.486	611.135	377.023	481.135	607.798	510.846	464.594	455.257		0.292424	0.302642	0.253833	0.232434	1.17953	1.45542	0.649597	0.703527	1.25847	1.27654	0.787527	1.005	1.26957	1.06706	0.970445	0.950942		1.03494	1.2339	1.01436	0.840486	0.915694	1.08302	1.27614	0.979903
51	Q6H8Q1	ABLIM2	Actin-binding LIM protein 2 OS=Homo sapiens OX=9606 GN=ABLIM2 PE=1 SV=2			1	64.1685	55.2839	118.711	105.218	190.084	231.153	228.718	237.701	215.082	224.52	285.827	356.848	231.815	173.807	318.333	338.148		0.366076	0.31539	0.677236	0.60026	1.08441	1.31871	1.30482	1.35606	1.22703	1.28087	1.63062	2.03579	1.32249	0.991555	1.81606	1.92911		0.861543	1.21606	1.04388	0.749766	0.886337	1.03928	1.24848	1.06225
52	Q12979	ABR	Active breakpoint cluster region-related protein OS=Homo sapiens OX=9606 GN=ABR PE=2 SV=2			5	144.076	111.732	156.687	138.468	467.518	514.195	332.05	358.77	557.57	491.339	489.949	569.461	529.156	416.899	555.496	484.623		0.339338	0.263159	0.36904	0.326129	1.10113	1.21107	0.782067	0.845	1.31323	1.15724	1.15396	1.34123	1.2463	0.981909	1.30834	1.14142		0.775507	1.09984	0.881215	0.787857	0.883724	1.08047	1.16229	0.872415
53	Q6UWZ7	ABRAXAS1	BRCA1-A complex subunit Abraxas 1 OS=Homo sapiens OX=9606 GN=ABRAXAS1 PE=1 SV=2			3	144.576	139.766	193.643	169.1	507.365	590.761	433.132	449.345	642.248	516.252	541.484	698.912	603.253	523.77	585.04	626.554		0.304781	0.294641	0.408219	0.35648	1.06958	1.24538	0.913086	0.947265	1.35392	1.08831	1.1415	1.47338	1.27172	1.10416	1.23332	1.32084		0.96673	1.16437	0.80382	0.868243	0.873256	1.03743	1.29073	1.07096
54	Q15018	ABRAXAS2	BRISC complex subunit Abraxas 2 OS=Homo sapiens OX=9606 GN=ABRAXAS2 PE=1 SV=2			2	28.0677	21.1605	27.2161	25.4706	80.213	85.9523	61.7642	63.2487	101.95	80.2588	77.475	72.7597	100.394	82.2574	112.813	83.7773		0.361436	0.27249	0.350469	0.327992	1.03292	1.10683	0.795355	0.814471	1.31284	1.03351	0.997667	0.936947	1.2928	1.05925	1.45272	1.07882		0.753909	1.07155	0.787237	0.819346	0.935865	1.02403	0.939138	0.742621
55	Q9ULW3	ABT1	Activator of basal transcription 1 OS=Homo sapiens OX=9606 GN=ABT1 PE=1 SV=1			3	140.403	97.8052	184.307	124.604	322.404	353.444	286.835	211.011	376.975	264.336	274.571	266.649	446.951	275.01	389.3	272.993		0.436464	0.304042	0.572946	0.38735	1.00224	1.09873	0.891669	0.655959	1.17188	0.821728	0.853545	0.828918	1.38941	0.854909	1.2102	0.848639		0.696603	1.09628	0.701203	0.615302	0.676068	0.735653	0.971148	0.701241
56	P09110	ACAA1	3-ketoacyl-CoA thiolase, peroxisomal OS=Homo sapiens OX=9606 GN=ACAA1 PE=1 SV=2			3	52.5028	33.4361	54.1511	52.4276	201.208	175.602	159.862	167.271	248.855	211.045	234.194	274.467	208.746	156.512	235.592	226.4		0.295245	0.188025	0.304514	0.294822	1.13148	0.987483	0.89897	0.940634	1.39941	1.18679	1.31697	1.54344	1.17386	0.880132	1.32483	1.27314		0.636844	0.872739	0.848064	0.749772	0.968172	1.04635	1.17196	0.960983
57	P42765	ACAA2	3-ketoacyl-CoA thiolase, mitochondrial OS=Homo sapiens OX=9606 GN=ACAA2 PE=1 SV=2			5	322.079	234.304	377.822	319.706	1269.33	1328.97	1051.42	1143.75	1543.81	1261.35	1340.88	1501.94	1379.4	1028.84	1638.26	1558.07		0.285365	0.207596	0.334754	0.283263	1.12464	1.17748	0.931569	1.01337	1.36783	1.11757	1.18803	1.33073	1.22216	0.911563	1.45152	1.38047		0.727474	1.04699	0.817037	0.745861	0.846182	1.08781	1.12012	0.951052
58	Q13085	ACACA	Acetyl-CoA carboxylase 1 OS=Homo sapiens OX=9606 GN=ACACA PE=1 SV=2			17	504.31	407.649	508.506	429.104	2117.04	2000.28	1182.6	1353.69	2237.72	2114.74	1647.74	1851.7	1857.47	1530.73	2026.62	1735.37		0.300339	0.242773	0.302838	0.255551	1.26079	1.19126	0.704291	0.806183	1.33266	1.25942	0.981303	1.10277	1.10621	0.911618	1.20694	1.03349		0.80833	0.944848	0.945042	0.824094	0.843852	1.14467	1.12378	0.856288
59	Q6JQN1	ACAD10	Acyl-CoA dehydrogenase family member 10 OS=Homo sapiens OX=9606 GN=ACAD10 PE=1 SV=1			2	43.7849	42.1345	78.6555	65.9779	156.588	196.808	198.904	235.109	299.426	269.406	314.743	386.325	158.354	144.662	344.589	291.281		0.266108	0.256077	0.478038	0.400988	0.951682	1.19612	1.20886	1.4289	1.8198	1.63735	1.91289	2.34793	0.962415	0.8792	2.09428	1.77029		0.962307	1.25685	0.899742	0.913535	0.838821	1.18202	1.22743	0.8453
60	Q709F0	ACAD11	Acyl-CoA dehydrogenase family member 11 OS=Homo sapiens OX=9606 GN=ACAD11 PE=1 SV=3			3	121.895	116.37	154.566	120.961	458.349	468.231	293.735	315.007	593.377	514.552	371.707	433.173	499.475	381.232	450.013	470.119		0.291424	0.278215	0.369533	0.289191	1.09581	1.11944	0.702255	0.753112	1.41863	1.23018	0.888669	1.03562	1.19413	0.911441	1.07588	1.12395		0.954674	1.02156	0.867159	0.763265	0.782585	1.07242	1.16536	1.04468
61	Q9UKU7	ACAD8	Isobutyryl-CoA dehydrogenase, mitochondrial OS=Homo sapiens OX=9606 GN=ACAD8 PE=1 SV=1			1	41.2371	24.4317	64.3063	47.7982	183.144	164.166	186.741	149.603	204.997	142.118	235.741	243.541	199.469	141.633	251.309	244.378		0.262303	0.155406	0.409043	0.304037	1.16495	1.04423	1.18783	0.951602	1.30395	0.903991	1.49951	1.54913	1.26879	0.900906	1.59854	1.55445		0.592469	0.896377	0.693269	0.71005	0.74329	0.801126	1.03309	0.97242
62	Q9H845	ACAD9	Acyl-CoA dehydrogenase family member 9, mitochondrial OS=Homo sapiens OX=9606 GN=ACAD9 PE=1 SV=1			6	58.8028	40.5848	170.85	616.943	143.401	383.215	1368.29	464.702	583	342.813	1223.4	2115.25	892.708	924.108	1058.54	1436.71		0.140181	0.0967507	0.407292	1.47074	0.341856	0.913552	3.26189	1.10781	1.38982	0.817237	2.91648	5.04258	2.12814	2.203	2.52347	3.425		0.690185	2.67233	0.588015	1.03517	3.61102	0.339622	1.72899	1.35726
63	P28330	ACADL	Long-chain specific acyl-CoA dehydrogenase, mitochondrial OS=Homo sapiens OX=9606 GN=ACADL PE=1 SV=2			1	31.0425	25.9243	50.4432	33.0087	80.0137	81.601	73.2648	68.6839	65.6785	65.0357	69.8872	79.2105	100.833	68.1948	90.3608	85.388		0.44735	0.373592	0.726932	0.475685	1.15307	1.17594	1.05581	0.989797	0.946486	0.937223	1.00714	1.14149	1.45309	0.982748	1.30218	1.23052		0.835123	1.01984	0.990213	0.676314	0.654374	0.937475	1.1334	0.944967
64	P11310	ACADM	Medium-chain specific acyl-CoA dehydrogenase, mitochondrial OS=Homo sapiens OX=9606 GN=ACADM PE=1 SV=1			3	117.307	92.4208	128.097	116.558	301.671	346.155	266.301	268.003	350.671	295.513	281.582	359.198	365.963	310.428	336.104	334.235		0.413194	0.325537	0.4512	0.410556	1.06258	1.21927	0.938	0.943995	1.23518	1.04089	0.991825	1.26521	1.28904	1.09343	1.18387	1.17729		0.787854	1.14746	0.842707	0.84825	0.90992	1.00639	1.27564	0.994439
65	P16219	ACADS	Short-chain specific acyl-CoA dehydrogenase, mitochondrial OS=Homo sapiens OX=9606 GN=ACADS PE=1 SV=1			2	9.80127	6.93972	10.4272	8.99656	39.4325	48.7599	32.5853	30.9539	57.4507	40.0065	41.7666	46.3731	45.2387	31.1489	45.4647	42.2155		0.258059	0.182717	0.274539	0.236871	1.03822	1.2838	0.857942	0.814988	1.51263	1.05334	1.09968	1.22096	1.19109	0.820122	1.19704	1.1115		0.708043	1.23654	0.696362	0.688545	0.862797	0.949934	1.11029	0.928534
66	P45954	ACADSB	Short/branched chain specific acyl-CoA dehydrogenase, mitochondrial OS=Homo sapiens OX=9606 GN=ACADSB PE=1 SV=1			8	210.071	164.271	164.263	135.875	850.614	888.166	467.198	487.259	1576.1	1075.07	893.818	758.627	918.028	849.748	1116.94	715.915		0.236379	0.184843	0.184834	0.152891	0.957141	0.999395	0.525708	0.548281	1.77348	1.20971	1.00576	0.853634	1.033	0.956166	1.25682	0.805573		0.781978	1.04415	0.682108	0.925623	0.82718	1.04294	0.848749	0.640961
67	P49748	ACADVL	Very long-chain specific acyl-CoA dehydrogenase, mitochondrial OS=Homo sapiens OX=9606 GN=ACADVL PE=1 SV=1			6	219.781	182.601	381.35	320.239	681.127	796.981	888.993	752.188	1110.85	762.649	1104.97	1374	821.517	615.22	971.67	890.563		0.310285	0.257795	0.538388	0.452111	0.961611	1.12517	1.25507	1.06193	1.56829	1.0767	1.55999	1.9398	1.15981	0.868564	1.3718	1.25729		0.830832	1.17009	0.686545	0.748883	0.839751	0.846112	1.24347	0.916528
68	Q15057	ACAP2	Arf-GAP with coiled-coil, ANK repeat and PH domain-containing protein 2 OS=Homo sapiens OX=9606 GN=ACAP2 PE=1 SV=3			1	9.47492	6.99653	13.0795	9.83425	20.6113	20.0917	28.607	23.1881	27.746	20.8106	26.1045	37.5782	26.6183	21.0252	25.388	26.1088		0.44878	0.331391	0.619511	0.465799	0.976254	0.951644	1.35497	1.0983	1.31419	0.985694	1.23644	1.77989	1.26078	0.995859	1.2025	1.23664		0.738426	0.974791	0.75004	0.789878	0.751883	0.810574	1.43953	1.02839
69	Q96P50	ACAP3	Arf-GAP with coiled-coil, ANK repeat and PH domain-containing protein 3 OS=Homo sapiens OX=9606 GN=ACAP3 PE=1 SV=2			2	66.3074	42.5144	64.062	57.6236	204.383	200.882	155.625	141.629	231.957	214.164	166.516	219.552	212.918	156.133	189.491	198.434		0.370657	0.237655	0.358106	0.322115	1.1425	1.12293	0.869941	0.791704	1.29664	1.19717	0.930822	1.22729	1.19021	0.872781	1.05925	1.10924		0.641171	0.98287	0.923292	0.733301	0.899497	0.910066	1.3185	1.04719
70	P24752	ACAT1	Acetyl-CoA acetyltransferase, mitochondrial OS=Homo sapiens OX=9606 GN=ACAT1 PE=1 SV=1			10	609.62	461.248	670.964	494.077	2093.09	2160.41	1681.82	1795.73	2814.14	2219.32	2139.03	2726.22	2160.2	1764.69	2633.84	2346.37		0.317632	0.240326	0.349595	0.257431	1.09057	1.12565	0.876285	0.935635	1.46626	1.15634	1.11451	1.42045	1.12554	0.919463	1.37232	1.22254		0.756616	1.03216	0.788632	0.81691	0.736369	1.06773	1.27451	0.890855
71	Q9BWD1	ACAT2	Acetyl-CoA acetyltransferase, cytosolic OS=Homo sapiens OX=9606 GN=ACAT2 PE=1 SV=2			2	43.1668	24.4856	60.6924	43.7975	127.65	126.715	137.517	132.058	189.834	120.243	245.082	192.419	220.517	151.365	358.637	221.53		0.297104	0.168527	0.417727	0.301445	0.878576	0.872141	0.946487	0.908915	1.30657	0.827596	1.68682	1.32436	1.51775	1.0418	2.46839	1.52472		0.567232	0.992675	0.633411	0.68641	0.721631	0.960303	0.785121	0.6177
72	Q9H3P7	ACBD3	Golgi resident protein GCP60 OS=Homo sapiens OX=9606 GN=ACBD3 PE=1 SV=4			3	38.2489	30.0694	49.6511	49.0554	98.1086	125.814	90.5717	101.008	129.605	98.7882	126.52	163.85	149.383	124.016	145.554	135.518		0.368357	0.289584	0.478167	0.47243	0.944838	1.21166	0.872254	0.972761	1.24817	0.951383	1.21846	1.57796	1.43864	1.19434	1.40176	1.30511		0.786151	1.2824	0.762225	0.830188	0.988002	1.11523	1.29505	0.93105
73	Q5T8D3	ACBD5	Acyl-CoA-binding domain-containing protein 5 OS=Homo sapiens OX=9606 GN=ACBD5 PE=1 SV=1			7	266.188	250.093	365.12	524.853	522.371	883.746	690.45	505.48	990.644	731.364	586.561	1260.83	2052.97	1385.44	685.917	988.497		0.277845	0.261046	0.38111	0.547839	0.545248	0.922449	0.720688	0.527617	1.03403	0.763394	0.612249	1.31605	2.14288	1.44611	0.715956	1.03179		0.939535	1.6918	0.738271	0.674847	1.43748	0.732102	2.14953	1.44113
74	Q9BR61	ACBD6	Acyl-CoA-binding domain-containing protein 6 OS=Homo sapiens OX=9606 GN=ACBD6 PE=1 SV=1			2	109.991	81.1871	143.188	131.673	373.135	396.702	363.307	391.689	485.648	422.636	570.624	652.395	474.081	422.248	704.532	530.195		0.304926	0.225073	0.396957	0.365035	1.03444	1.09977	1.00719	1.08587	1.34635	1.17167	1.58193	1.80862	1.31429	1.17059	1.95316	1.46985		0.738125	1.06316	0.870252	0.890666	0.919581	1.07812	1.1433	0.752549
75	Q96AP0	ACD	Adrenocortical dysplasia protein homolog OS=Homo sapiens OX=9606 GN=ACD PE=1 SV=3			3	154.737	106.444	323.781	226.979	577.983	500.815	654.826	526.449	577.736	417.682	800.633	748.723	651.637	403.45	1006.7	711.612		0.315453	0.217001	0.660073	0.462728	1.1783	1.02098	1.33495	1.07324	1.1778	0.851503	1.6322	1.52638	1.32845	0.822489	2.0523	1.45072		0.687903	0.866487	0.722963	0.619133	0.701026	0.803953	0.935164	0.706876
76	P12821	ACE	Angiotensin-converting enzyme OS=Homo sapiens OX=9606 GN=ACE PE=1 SV=1			2	8.07848	2.80627	11.344	22.0313	17.6946	19.263	29.2715	17.4722	62.9943	42.3012	52.1347	81.2654	58.6886	31.2055	49.7752	56.6656		0.219143	0.076125	0.307726	0.597637	0.479997	0.522542	0.79404	0.473964	1.70883	1.14749	1.41424	2.20447	1.59203	0.846503	1.35024	1.53715		0.347376	1.08864	0.671508	0.531713	1.94211	0.596901	1.55876	1.13843
77	Q9UKV3	ACIN1	Apoptotic chromatin condensation inducer in the nucleus OS=Homo sapiens OX=9606 GN=ACIN1 PE=1 SV=2			16	2278.28	2554.37	3061.56	2696.27	3849.3	5337.58	3423.04	4315.35	2830.56	4125.19	3757.34	4626.26	4166.44	3423.18	4694.25	4662.24		0.694355	0.7785	0.933077	0.821747	1.17316	1.62674	1.04325	1.3152	0.862674	1.25724	1.14513	1.40995	1.26981	1.04329	1.43067	1.42092		1.12118	1.38664	1.45738	0.821608	0.880685	1.26068	1.23126	0.993181
78	P53396	ACLY	ATP-citrate synthase OS=Homo sapiens OX=9606 GN=ACLY PE=1 SV=3			15	1324.99	1093.91	1514.64	1391.61	2868.33	3769.11	2565.57	2374.98	4769.39	4180.71	3154.09	4480.48	3868.39	3266.39	3402.12	3461.35		0.413056	0.341018	0.472178	0.433824	0.894181	1.17499	0.799797	0.740382	1.48682	1.30331	0.983264	1.39676	1.20594	1.01827	1.06059	1.07905		0.825599	1.31404	0.876571	0.84438	0.918773	0.925712	1.42053	1.01741
79	P21399	ACO1	Cytoplasmic aconitate hydratase OS=Homo sapiens OX=9606 GN=ACO1 PE=1 SV=3			1	21.4273	17.8195	33.6918	32.9225	47.4574	53.5428	50.7769	48.8616	64.6053	42.3296	70.3427	85.4071	52.7561	40.5459	68.9717	57.5856		0.460193	0.382709	0.723597	0.707075	1.01924	1.14994	1.09053	1.0494	1.38753	0.909111	1.51075	1.83428	1.13304	0.870803	1.4813	1.23676		0.831626	1.12823	0.655203	0.768554	0.977167	0.96228	1.21416	0.834916
80	Q99798	ACO2	Aconitate hydratase, mitochondrial OS=Homo sapiens OX=9606 GN=ACO2 PE=1 SV=2			6	393.049	355.219	703.664	668.646	957.048	1074.67	1417.1	1166.64	1181.56	934.87	1467.74	2222.01	1099.52	923.052	1229.68	1363.47		0.432971	0.391299	0.775136	0.736561	1.05426	1.18383	1.56104	1.28514	1.30157	1.02983	1.61682	2.4477	1.2112	1.01681	1.35458	1.50196		0.903752	1.1229	0.791217	0.839505	0.950235	0.823259	1.5139	1.1088
81	P49753	ACOT2	Acyl-coenzyme A thioesterase 2, mitochondrial OS=Homo sapiens OX=9606 GN=ACOT2 PE=1 SV=6			2	74.1921	63.6428	102.068	91.2478	820.057	808.263	690.745	796.994	1069.14	767.093	931.85	959.513	1051.15	888.885	1495.41	1122.67		0.0984457	0.0844478	0.135434	0.121077	1.08814	1.07249	0.916551	1.05753	1.41864	1.01786	1.23647	1.27318	1.39477	1.17946	1.98426	1.48967		0.857811	0.985618	0.717486	0.845631	0.89399	1.15382	1.02969	0.750744
82	O00154	ACOT7	Cytosolic acyl coenzyme A thioester hydrolase OS=Homo sapiens OX=9606 GN=ACOT7 PE=1 SV=3			5	340.008	216.784	369.277	261.6	1353.92	1388.94	941.439	925.422	1827.79	1473.85	1187.16	1316.2	1765.78	1269.98	1485.44	1427.22		0.257217	0.163997	0.279359	0.197901	1.02424	1.05074	0.7122	0.700083	1.38273	1.11497	0.898088	0.995707	1.33582	0.960742	1.12374	1.07969		0.637585	1.02587	0.806356	0.719218	0.708411	0.982987	1.1087	0.960806
83	O14734	ACOT8	Acyl-coenzyme A thioesterase 8 OS=Homo sapiens OX=9606 GN=ACOT8 PE=1 SV=1			1	317.596	224.191	438.506	360.451	980.186	1254.97	1015.22	891.919	1218.19	1194.76	1180.75	1694.6	1061.38	840.672	1178.83	1486.92		0.355119	0.250678	0.490314	0.403037	1.09599	1.40324	1.13516	0.997295	1.36211	1.33592	1.32025	1.89481	1.18678	0.939994	1.3181	1.66259		0.7059	1.28034	0.980767	0.792056	0.821998	0.878548	1.43519	1.26135
84	Q9Y305	ACOT9	Acyl-coenzyme A thioesterase 9, mitochondrial OS=Homo sapiens OX=9606 GN=ACOT9 PE=1 SV=2			9	841.042	822.711	958.413	710.665	2055.77	2431.64	1772.29	1614.5	4848.49	2272.33	2304.5	2491.69	3746	2543.44	2523.57	2118.33		0.292758	0.286377	0.333613	0.247375	0.715592	0.846428	0.616915	0.56199	1.68771	0.790974	0.802172	0.867331	1.30394	0.885344	0.878428	0.737368		0.978204	1.18284	0.468668	0.678975	0.741502	0.910968	1.08123	0.839418
85	Q15067	ACOX1	Peroxisomal acyl-coenzyme A oxidase 1 OS=Homo sapiens OX=9606 GN=ACOX1 PE=1 SV=3			1	9.62672	9.53114	16.6739	14.5909	23.3132	28.3928	16.6849	21.9315	35.7221	25.7601	18.2848	35.0465	26.976	23.0635	29.4036	23.6813		0.402632	0.398634	0.697375	0.610255	0.97506	1.18751	0.697835	0.917271	1.49405	1.0774	0.76475	1.4658	1.12825	0.964616	1.22979	0.990455		0.990071	1.21789	0.721125	0.854964	0.875074	1.31445	1.9167	0.805388
86	O15254	ACOX3	Peroxisomal acyl-coenzyme A oxidase 3 OS=Homo sapiens OX=9606 GN=ACOX3 PE=1 SV=2			1	5.13916	0	5.40986	6.28546	16.3924	17.1099	16.1282	18.787	14.0866	13.1743	16.0671	13.9968	11.8452	14.6612	18.5342	20.3156		0.433105	0	0.455919	0.52971	1.38148	1.44195	1.35921	1.58328	1.18716	1.11027	1.35406	1.17959	0.998261	1.23558	1.56198	1.71211		0	1.04377	0.935236	1.23773	1.16185	1.16485	0.871147	1.09611
87	P24666	ACP1	Low molecular weight phosphotyrosine protein phosphatase OS=Homo sapiens OX=9606 GN=ACP1 PE=1 SV=3			3	84.4078	64.6502	131.047	100.557	319.223	333.906	276.95	238.136	592.562	454.672	513.649	523.577	495.893	408.012	882.995	497.133		0.226281	0.173315	0.351312	0.269574	0.855777	0.895139	0.742451	0.638398	1.58855	1.21889	1.377	1.40361	1.3294	1.0938	2.36714	1.33272		0.765927	1.046	0.767299	0.822782	0.767335	0.859852	1.01933	0.563008
88	Q96CM8	ACSF2	Acyl-CoA synthetase family member 2, mitochondrial OS=Homo sapiens OX=9606 GN=ACSF2 PE=1 SV=2			1	34.718	33.7517	61.5946	40.6871	137.546	148.424	138.547	126.75	260.285	206.016	240.746	224.714	165.149	127.131	222.32	148.8		0.232345	0.225878	0.412212	0.272292	0.920505	0.993304	0.927204	0.848254	1.74192	1.37873	1.61115	1.50386	1.10523	0.850804	1.48784	0.995821		0.972167	1.07909	0.791502	0.769796	0.660563	0.914852	0.933407	0.669306
89	Q4G176	ACSF3	Acyl-CoA synthetase family member 3, mitochondrial OS=Homo sapiens OX=9606 GN=ACSF3 PE=1 SV=3			1	43.9006	34.6805	70.129	61.8372	115.002	117.54	152.326	113.946	121.539	90.3566	169.051	181.409	146.065	104.681	182.053	145.764		0.411723	0.325252	0.657706	0.579941	1.07855	1.10235	1.42859	1.06864	1.13986	0.847411	1.58545	1.70135	1.36987	0.981753	1.70739	1.36705		0.789978	1.02207	0.743437	0.716674	0.881764	0.74804	1.0731	0.800668
90	P33121	ACSL1	Long-chain-fatty-acid--CoA ligase 1 OS=Homo sapiens OX=9606 GN=ACSL1 PE=1 SV=1			6	372.874	296.631	526.95	467.303	1392.79	1503.49	1223.72	1278.05	1942.64	1647.64	1451.56	1739.94	1546.92	1219.93	1549.81	1571.2		0.283812	0.22578	0.401087	0.355686	1.06012	1.14438	0.931431	0.972784	1.47864	1.2541	1.10485	1.32435	1.17743	0.928547	1.17963	1.19591		0.795526	1.07948	0.848145	0.788619	0.886807	1.0444	1.19867	1.0138
91	O95573	ACSL3	Long-chain-fatty-acid--CoA ligase 3 OS=Homo sapiens OX=9606 GN=ACSL3 PE=1 SV=3			9	598.701	500.661	675.222	554.953	1943.48	2032.86	1299.15	1455.79	2127.6	2018.29	1765.59	1984.26	2097.82	1776.31	2177.38	1905.49		0.353863	0.295916	0.399091	0.328006	1.1487	1.20152	0.767864	0.860447	1.25752	1.19291	1.04355	1.1728	1.23992	1.04989	1.28694	1.12624		0.836245	1.04599	0.948623	0.846741	0.821882	1.12057	1.12385	0.87513
92	O60488	ACSL4	Long-chain-fatty-acid--CoA ligase 4 OS=Homo sapiens OX=9606 GN=ACSL4 PE=1 SV=2			7	425.684	269.825	410.956	320.815	1195.4	1192.12	797.96	828.557	1489.3	1366.74	1060.06	1293.88	1340.58	1019.07	1295.43	1320.68		0.382554	0.242487	0.369319	0.288311	1.07428	1.07134	0.717112	0.744609	1.33841	1.22826	0.952657	1.16279	1.20475	0.91582	1.16418	1.18687		0.633862	0.997256	0.917706	0.760171	0.780655	1.03834	1.22057	1.01949
93	Q9NUB1	ACSS1	Acetyl-coenzyme A synthetase 2-like, mitochondrial OS=Homo sapiens OX=9606 GN=ACSS1 PE=1 SV=2			2	118.167	102.03	213.438	170.599	352.401	362.353	495.244	331.314	518.807	329.725	657.563	758.43	397.647	277.451	540.223	464.105		0.340779	0.294242	0.615529	0.491986	1.01628	1.04498	1.42822	0.955469	1.49618	0.950886	1.89633	2.18722	1.14676	0.800134	1.55794	1.33842		0.863439	1.02824	0.635545	0.697732	0.799291	0.668991	1.1534	0.859099
94	P68133	ACTA1	Actin, alpha skeletal muscle OS=Homo sapiens OX=9606 GN=ACTA1 PE=1 SV=1			9	335.804	503.896	541.662	481.405	674.342	1032.77	788.075	778.182	850.172	882.386	1643.47	1170.99	1003.06	989.911	1708.14	932.452		0.469102	0.703918	0.756676	0.672499	0.942023	1.44273	1.1009	1.08708	1.18765	1.23265	2.29585	1.63582	1.40123	1.38286	2.38619	1.30259		1.50057	1.53152	1.03789	0.986891	0.888755	0.987447	0.712511	0.545887
95	P63261	ACTG1	Actin, cytoplasmic 2 OS=Homo sapiens OX=9606 GN=ACTG1 PE=1 SV=1			6	769.391	521.377	808.508	707.986	1442.96	1976.16	1474.88	1300.31	2251.62	2062.67	1885.75	2759.49	1955.35	1653.5	1782.53	1917.76		0.479422	0.32488	0.503797	0.441159	0.899136	1.23138	0.919026	0.810248	1.40303	1.28529	1.17505	1.71949	1.21842	1.03033	1.11073	1.19499		0.677649	1.36952	0.916083	0.845629	0.87567	0.881638	1.46334	1.07586
96	O96019	ACTL6A	Actin-like protein 6A OS=Homo sapiens OX=9606 GN=ACTL6A PE=1 SV=1			6	199.318	162.042	317.661	228.048	554.89	532.717	494.921	416.569	562.682	419.22	559.524	499.412	768.853	532.75	776.883	563.91		0.382248	0.310761	0.609204	0.437346	1.06416	1.02163	0.94915	0.798888	1.0791	0.803972	1.07304	0.957763	1.47449	1.0217	1.48989	1.08146		0.812982	0.960041	0.745039	0.692915	0.717897	0.841688	0.892566	0.725862
97	P12814	ACTN1	Alpha-actinin-1 OS=Homo sapiens OX=9606 GN=ACTN1 PE=1 SV=2			8	338.12	430.813	488.724	547.922	717.375	1237.28	880.253	855.254	1239.29	1273.07	954.315	1625.5	839.941	1009.28	868.346	970.884		0.431451	0.54973	0.623626	0.699164	0.915391	1.5788	1.12323	1.09133	1.58137	1.62447	1.21773	2.07418	1.07179	1.28787	1.10803	1.23888		1.27414	1.72473	1.02726	1.20161	1.12113	0.9716	1.70332	1.11808
98	O43707	ACTN4	Alpha-actinin-4 OS=Homo sapiens OX=9606 GN=ACTN4 PE=1 SV=2			9	375.882	555.003	460.551	650.42	706.554	1876.93	1037.27	1023.69	1477.43	2464.4	1520.6	2400.33	1111.7	1424.54	1120.87	1473.63		0.409506	0.60465	0.501749	0.708602	0.769758	2.04483	1.13006	1.11526	1.60959	2.68485	1.65662	2.61505	1.21115	1.55197	1.22114	1.60545		1.47654	2.65646	1.66803	1.28141	1.41226	0.986908	1.57854	1.31472
99	Q9NZ32	ACTR10	Actin-related protein 10 OS=Homo sapiens OX=9606 GN=ACTR10 PE=1 SV=1			6	292.428	247.238	298.69	267.002	1135.83	1150.43	720.124	781.116	1265.12	1033.77	877.685	1003.13	1109.22	918.605	1369.42	1014.93		0.307609	0.260073	0.314196	0.280863	1.19479	1.21015	0.757507	0.821666	1.3308	1.08744	0.923248	1.0552	1.1668	0.966292	1.44051	1.06762		0.845466	1.01285	0.817132	0.828154	0.89391	1.0847	1.14293	0.741139
100	P61163	ACTR1A	Alpha-centractin OS=Homo sapiens OX=9606 GN=ACTR1A PE=1 SV=1			7	484.355	461.935	356.383	339.638	1319.64	1488.1	867.157	967.061	1623.5	1336.27	1121.07	1612.06	1366.19	1363.26	1603.75	1222.82		0.404161	0.385453	0.297377	0.283405	1.10115	1.24172	0.723583	0.806946	1.3547	1.11503	0.935456	1.34515	1.13999	1.13755	1.33822	1.02036		0.953712	1.12766	0.82308	0.997855	0.953014	1.11521	1.43797	0.762475
101	P61160	ACTR2	Actin-related protein 2 OS=Homo sapiens OX=9606 GN=ACTR2 PE=1 SV=1			3	255.351	236.797	271.829	274.467	665.884	862.408	614.54	553.537	883.395	868.218	785.872	919.331	794.632	621.239	786.374	737.033		0.392959	0.364407	0.418317	0.422377	1.02473	1.32716	0.945715	0.851837	1.35946	1.3361	1.20938	1.41476	1.22286	0.956024	1.21015	1.13422		0.927339	1.29513	0.98282	0.781795	1.0097	0.900734	1.16982	0.937255
102	P61158	ACTR3	Actin-related protein 3 OS=Homo sapiens OX=9606 GN=ACTR3 PE=1 SV=3			4	181.736	181.903	258.418	222.872	425.089	570.478	421.705	395.067	525.958	505.942	422.059	596.733	493.168	447.044	457.139	570.918		0.447089	0.447499	0.635734	0.548287	1.04576	1.40343	1.03744	0.971904	1.29391	1.24467	1.03831	1.46802	1.21324	1.09977	1.12461	1.40451		1.00092	1.34202	0.961944	0.906474	0.862448	0.936833	1.41386	1.24889
103	Q9H9F9	ACTR5	Actin-related protein 5 OS=Homo sapiens OX=9606 GN=ACTR5 PE=1 SV=2			3	149.618	94.3495	198.997	178.404	321.183	263.034	320.2	250.655	334.233	207.189	375.013	370.645	534.91	342.854	539.28	383.06		0.44664	0.281652	0.594046	0.532572	0.958795	0.785209	0.955861	0.748255	0.997752	0.6185	1.11949	1.10645	1.59681	1.02349	1.60986	1.14351		0.630603	0.818954	0.619894	0.640956	0.896516	0.782808	0.988352	0.710317
104	Q9GZN1	ACTR6	Actin-related protein 6 OS=Homo sapiens OX=9606 GN=ACTR6 PE=1 SV=1			2	17.9378	12.8633	30.6757	32.1288	56.5796	63.477	58.8896	46.5307	52.189	38.335	59.1876	72.512	75.8489	55.9061	70.9293	73.4576		0.35423	0.254021	0.605774	0.63447	1.11732	1.25352	1.16293	0.918874	1.03061	0.757028	1.16882	1.43194	1.49784	1.10402	1.40069	1.45062		0.717106	1.12191	0.734542	0.737072	1.04737	0.790134	1.22512	1.03565
105	Q9H981	ACTR8	Actin-related protein 8 OS=Homo sapiens OX=9606 GN=ACTR8 PE=1 SV=2			1	10.9547	7.15696	19.2765	12.6227	24.9868	25.2357	24.8433	25.8808	26.0707	14.8027	34.1837	30.5814	40.2148	25.448	47.812	33.7968		0.428642	0.280042	0.754263	0.493909	0.977699	0.987438	0.972084	1.01268	1.02011	0.579209	1.33756	1.19661	1.57355	0.995745	1.87082	1.32242		0.653323	1.00996	0.567791	0.632802	0.654823	1.04176	0.894619	0.706869
106	Q04771	ACVR1	Activin receptor type-1 OS=Homo sapiens OX=9606 GN=ACVR1 PE=1 SV=1			2	66.2912	60.4053	635.505	554.345	138.234	208.777	344.684	305.462	228.925	169.348	314.656	540.645	376.03	310.829	491.841	621.437		0.327574	0.298489	3.14031	2.73926	0.683075	1.03166	1.70324	1.50942	1.13122	0.836823	1.55485	2.67157	1.85813	1.53594	2.4304	3.0708		0.911211	1.51032	0.739753	0.826607	0.872291	0.886209	1.71821	1.26349
107	P36896	ACVR1B	Activin receptor type-1B OS=Homo sapiens OX=9606 GN=ACVR1B PE=1 SV=1			1	86.9987	86.5344	864.492	690.386	204.013	319.226	441.858	413.871	276.257	250.779	332.569	633.239	339.867	355.805	718.961	719.153		0.383619	0.381572	3.81196	3.04425	0.899592	1.40762	1.94837	1.82496	1.21815	1.10581	1.46646	2.79226	1.49864	1.56892	3.17025	3.17109		0.994663	1.56473	0.907774	1.04689	0.798603	0.936661	1.90408	1.00027
108	Q13705	ACVR2B	Activin receptor type-2B OS=Homo sapiens OX=9606 GN=ACVR2B PE=1 SV=3			1	7.61965	8.83184	50.9094	44.1696	12.2808	23.5326	25.0355	18.6165	23.2288	18.2831	26.3828	44.389	25.6818	22.7186	34.3078	51.2248		0.442932	0.513397	2.95937	2.56759	0.713885	1.36795	1.45532	1.08218	1.35029	1.0628	1.53364	2.58034	1.49289	1.32064	1.99432	2.97771		1.15909	1.91621	0.787088	0.884619	0.867612	0.743604	1.6825	1.49309
109	Q03154	ACY1	Aminoacylase-1 OS=Homo sapiens OX=9606 GN=ACY1 PE=1 SV=1			2	95.8104	81.4102	153.602	137.933	344.933	357.236	331.268	300.18	437.987	329.598	471.005	528.686	416.396	290.882	481.349	376.606		0.295911	0.251436	0.4744	0.426006	1.06533	1.10332	1.02312	0.927106	1.35272	1.01796	1.4547	1.63285	1.28604	0.89839	1.48665	1.16315		0.849701	1.03567	0.752529	0.698571	0.89799	0.906155	1.12246	0.782397
110	P07311	ACYP1	Acylphosphatase-1 OS=Homo sapiens OX=9606 GN=ACYP1 PE=1 SV=2			1	198.491	186.675	335.605	234.164	251.801	445.103	493.784	333.009	724.968	402.867	480.939	1313.88	360.277	352.377	344.842	482.858		0.51706	0.486279	0.874235	0.609986	0.655929	1.15947	1.28628	0.867472	1.88851	1.04945	1.25282	3.42259	0.938504	0.917925	0.898297	1.25782		0.940471	1.76768	0.555703	0.978072	0.697737	0.674402	2.73191	1.40023
111	O14672	ADAM10	Disintegrin and metalloproteinase domain-containing protein 10 OS=Homo sapiens OX=9606 GN=ADAM10 PE=1 SV=1			5	58.0477	42.4067	99.9269	133.155	149.177	178.656	201.481	148.742	453.101	263.943	314.669	544.143	480.308	291.009	321.375	386.841		0.203563	0.148713	0.350426	0.466951	0.523137	0.626515	0.706558	0.521612	1.58894	0.925601	1.10349	1.90821	1.68435	1.02052	1.12701	1.35658		0.730549	1.19761	0.582526	0.60588	1.33252	0.738243	1.72926	1.20371
112	Q13444	ADAM15	Disintegrin and metalloproteinase domain-containing protein 15 OS=Homo sapiens OX=9606 GN=ADAM15 PE=1 SV=4			1	20.2274	11.0296	35.8638	23.1474	70.228	65.5382	57.624	53.7693	89.8827	53.5587	81.3149	115.97	137.74	68.1467	99.235	87.0245		0.25437	0.138703	0.451006	0.291091	0.883154	0.824177	0.724652	0.676177	1.13032	0.673529	1.02258	1.45838	1.73215	0.856981	1.24793	1.09438		0.54528	0.93322	0.595873	0.494749	0.645425	0.933106	1.42618	0.876954
113	P78536	ADAM17	Disintegrin and metalloproteinase domain-containing protein 17 OS=Homo sapiens OX=9606 GN=ADAM17 PE=1 SV=1			5	394.37	297.986	602.025	553.712	1187.29	1248.88	1145.77	944.586	1442.88	1122.62	1299.62	1742.1	1663.82	1073.87	1531.15	1446.01		0.336467	0.254235	0.513634	0.472414	1.01297	1.06552	0.977544	0.805899	1.23103	0.957793	1.10881	1.48632	1.41953	0.916201	1.30634	1.2337		0.7556	1.05187	0.778041	0.645424	0.919749	0.824412	1.34047	0.944395
114	Q9P0K1	ADAM22	Disintegrin and metalloproteinase domain-containing protein 22 OS=Homo sapiens OX=9606 GN=ADAM22 PE=1 SV=1			1	11.3896	7.28432	13.5174	21.6754	23.3149	30.3814	27.7044	21.0441	36.4542	36.861	44.5307	59.5396	47.2581	36.1468	39.8416	43.7577		0.384729	0.246057	0.456604	0.732173	0.787554	1.02625	0.935827	0.710848	1.23139	1.24513	1.5042	2.01119	1.59633	1.221	1.34581	1.47809		0.639559	1.30309	1.01116	0.764881	1.60352	0.759594	1.33705	1.09829
115	Q13443	ADAM9	Disintegrin and metalloproteinase domain-containing protein 9 OS=Homo sapiens OX=9606 GN=ADAM9 PE=1 SV=1			2	312.295	185.096	376.736	377.252	826.656	919.365	810.25	667	1588.92	1041.49	1099.25	1590.62	1644.87	1097.81	1181.54	1227.19		0.285674	0.169318	0.344622	0.345094	0.75619	0.840997	0.741183	0.610144	1.45348	0.952711	1.00555	1.45503	1.50466	1.00423	1.08082	1.12258		0.592696	1.11215	0.65547	0.667414	1.00137	0.823203	1.447	1.03864
116	Q9UHI8	ADAMTS1	A disintegrin and metalloproteinase with thrombospondin motifs 1 OS=Homo sapiens OX=9606 GN=ADAMTS1 PE=1 SV=4			3	66.7458	44.6087	90.9517	70.0248	113.294	146.195	106.989	85.4636	290.243	198.187	114.563	137.297	145.936	89.0071	126.534	121.965		0.43326	0.289564	0.590386	0.454545	0.735414	0.948981	0.694487	0.554761	1.88403	1.28647	0.743651	0.891222	0.9473	0.577763	0.821358	0.791699		0.668337	1.2904	0.682831	0.609905	0.769912	0.798807	1.19844	0.963891
117	Q8TE58	ADAMTS15	A disintegrin and metalloproteinase with thrombospondin motifs 15 OS=Homo sapiens OX=9606 GN=ADAMTS15 PE=2 SV=1			1	137.162	114.052	180.134	161.992	249.823	270.071	248.116	200.501	313.577	228.726	271.822	273.331	381.072	271.941	349.955	271.371		0.50724	0.421777	0.666155	0.599064	0.923873	0.998752	0.91756	0.741474	1.15964	0.845854	1.00523	1.01081	1.40925	1.00567	1.29417	1.00356		0.831513	1.08105	0.729409	0.713621	0.899286	0.808094	1.00555	0.775445
118	O75689	ADAP1	Arf-GAP with dual PH domain-containing protein 1 OS=Homo sapiens OX=9606 GN=ADAP1 PE=1 SV=2			2	18.1097	15.2654	23.6479	36.9542	69.9803	168.534	113.349	116.795	249.232	197.929	240.016	475.748	159.474	150.671	207.404	312.999		0.145812	0.122911	0.190403	0.29754	0.563453	1.35697	0.91264	0.940386	2.00672	1.59364	1.93251	3.83053	1.28402	1.21314	1.66993	2.52014		0.842941	2.40831	0.794156	0.9448	1.56268	1.0304	1.98215	1.50913
119	Q9NPF8	ADAP2	Arf-GAP with dual PH domain-containing protein 2 OS=Homo sapiens OX=9606 GN=ADAP2 PE=1 SV=1			2	194.551	170.15	282.303	285.062	486.927	604.189	500.875	480.216	693.706	581.042	544.293	858.967	603.138	454.196	643.136	712.408		0.393366	0.344029	0.570793	0.576371	0.984525	1.22162	1.01273	0.970956	1.40261	1.17482	1.10051	1.73676	1.21949	0.918346	1.30037	1.44043		0.874578	1.24082	0.837591	0.753055	1.00977	0.958754	1.57813	1.10771
120	P55265	ADAR	Double-stranded RNA-specific adenosine deaminase OS=Homo sapiens OX=9606 GN=ADAR PE=1 SV=4			22	1464.92	1143.02	2037.94	1551.8	3214.65	3413.02	3350	2579.24	4079.73	3070.96	3586.37	3779.75	4406.69	2781.03	4098.81	3474.42		0.445062	0.347264	0.619153	0.471457	0.976653	1.03692	1.01777	0.783607	1.23948	0.932998	1.08959	1.14834	1.33881	0.844913	1.24527	1.05557		0.780261	1.06171	0.752736	0.631093	0.761455	0.769922	1.05392	0.847666
121	P78563	ADARB1	Double-stranded RNA-specific editase 1 OS=Homo sapiens OX=9606 GN=ADARB1 PE=1 SV=1			4	186.232	114.604	153.56	129.301	224.007	293.804	229.47	231.552	327.514	283.753	295.122	367.721	352.693	263.132	354.576	326.083		0.683141	0.420393	0.563292	0.474305	0.821708	1.07774	0.841747	0.849385	1.20139	1.04087	1.08257	1.34888	1.29376	0.965227	1.30066	1.19615		0.615383	1.31158	0.866384	0.746065	0.842023	1.00907	1.246	0.919642
122	Q9BUB4	ADAT1	tRNA-specific adenosine deaminase 1 OS=Homo sapiens OX=9606 GN=ADAT1 PE=1 SV=1			4	251.072	212.614	476.779	399.396	739.377	870.848	958.091	957.411	781.445	760.135	1149.14	1319.15	888.448	737.28	1458.65	1300.89		0.377503	0.319679	0.716869	0.600518	1.1117	1.30938	1.44055	1.43953	1.17495	1.14291	1.72781	1.98343	1.33584	1.10855	2.19318	1.95597		0.846825	1.17781	0.97273	0.829852	0.837696	0.99929	1.14795	0.891845
123	Q86TW2	ADCK1	Uncharacterized aarF domain-containing protein kinase 1 OS=Homo sapiens OX=9606 GN=ADCK1 PE=1 SV=2			2	12.1778	8.97936	24.0189	16.0006	38.7518	38.0355	60.3527	53.7763	49.9897	44.016	72.4747	91.6391	36.2536	45.8147	101.559	66.1234		0.355108	0.261841	0.700398	0.466582	1.13001	1.10913	1.7599	1.56813	1.45771	1.28352	2.11338	2.67222	1.05717	1.33597	2.96149	1.92818		0.737355	0.981516	0.880501	1.26373	0.666167	0.891034	1.26443	0.651084
124	Q7Z695	ADCK2	Uncharacterized aarF domain-containing protein kinase 2 OS=Homo sapiens OX=9606 GN=ADCK2 PE=1 SV=1			1	17.7715	15.6088	31.1872	21.9622	56.4446	55.7649	89.3959	72.58	78.3313	61.2465	120.773	125.73	73.7368	51.5194	116.571	98.8582		0.314145	0.275915	0.551293	0.388223	0.997765	0.98575	1.58024	1.28299	1.38465	1.08265	2.13489	2.22251	1.30344	0.910703	2.06061	1.74751		0.878305	0.987958	0.781891	0.698693	0.704206	0.811894	1.04104	0.848051
125	O60266	ADCY3	Adenylate cyclase type 3 OS=Homo sapiens OX=9606 GN=ADCY3 PE=1 SV=3			3	27.323	24.8151	64.3126	85.3294	79.5319	107.722	120.028	89.096	191.83	131.73	154.791	246.786	213.541	174.232	183.657	185.724		0.213367	0.193782	0.502221	0.666342	0.621069	0.841207	0.937305	0.695756	1.49801	1.02869	1.20877	1.92717	1.66755	1.36059	1.43419	1.45033		0.908213	1.35445	0.686702	0.815918	1.32679	0.742293	1.59432	1.01125
126	O43306	ADCY6	Adenylate cyclase type 6 OS=Homo sapiens OX=9606 GN=ADCY6 PE=1 SV=2			4	47.0266	32.9435	134.531	171.842	138.639	203.917	229.117	193.46	316.666	248.187	281.47	423.188	265.434	220.201	322.867	329.089		0.245005	0.171633	0.700896	0.895284	0.722299	1.06239	1.19368	1.00791	1.64981	1.29304	1.46644	2.20478	1.38289	1.14723	1.68211	1.71453		0.700529	1.47085	0.78375	0.829589	1.27734	0.844372	1.50349	1.01927
127	O60503	ADCY9	Adenylate cyclase type 9 OS=Homo sapiens OX=9606 GN=ADCY9 PE=1 SV=4			1	43.053	40.1294	158.27	221.923	109.779	169.556	238.647	155.192	450.262	276.816	342.219	616.485	527.43	379.605	372.981	439.851		0.152329	0.141985	0.559988	0.785204	0.388418	0.59992	0.844377	0.549098	1.59311	0.979425	1.21083	2.18124	1.86614	1.34311	1.31967	1.55627		0.932093	1.54452	0.614789	0.719726	1.40218	0.650299	1.80143	1.17929
128	P35611	ADD1	Alpha-adducin OS=Homo sapiens OX=9606 GN=ADD1 PE=1 SV=2			4	199.31	175.173	291.272	241.248	520.305	706.183	647.691	549.46	751.95	624.097	758.53	958.819	640.618	514.55	696.232	678.145		0.377448	0.331738	0.551604	0.45687	0.985341	1.33735	1.22658	1.04055	1.42402	1.1819	1.43649	1.81579	1.21319	0.974442	1.31851	1.28425		0.878897	1.35725	0.829971	0.803209	0.828257	0.848337	1.26405	0.974022
129	P35612	ADD2	Beta-adducin OS=Homo sapiens OX=9606 GN=ADD2 PE=1 SV=3			5	202.207	167.098	250.479	261.358	787.001	841.448	736.696	719.477	928.544	776.114	978.512	1129.78	887.414	709.78	1090.5	985.769		0.288335	0.238272	0.357168	0.372681	1.12222	1.19985	1.05048	1.02593	1.32405	1.10669	1.3953	1.611	1.2654	1.0121	1.55499	1.40565		0.826371	1.06918	0.83584	0.79983	1.04343	0.976627	1.15459	0.903961
130	Q9UEY8	ADD3	Gamma-adducin OS=Homo sapiens OX=9606 GN=ADD3 PE=1 SV=1			2	245.307	242.143	176.511	198.313	725.031	1011.15	465.014	483.269	1036.65	1031.93	593.76	868.524	955.146	810.012	617.774	567.312		0.331257	0.326985	0.238357	0.267797	0.979066	1.36543	0.627945	0.652596	1.39987	1.3935	0.8018	1.17284	1.28981	1.09382	0.834228	0.766086		0.987102	1.39463	0.995447	0.84805	1.12352	1.03926	1.46275	0.918316
131	Q86SQ4	ADGRG6	Adhesion G-protein coupled receptor G6 OS=Homo sapiens OX=9606 GN=ADGRG6 PE=1 SV=3			1	12.3345	5.57044	12.0489	5.27366	25.7805	22.5974	15.9073	12.6844	40.4322	26.9174	21.0772	26.1324	33.541	22.8305	19.975	19.4721		0.440171	0.198788	0.429979	0.188197	0.920008	0.806415	0.567671	0.452658	1.44287	0.960579	0.752165	0.932566	1.19695	0.814733	0.712832	0.694885		0.451615	0.876531	0.665742	0.680674	0.437688	0.797395	1.23984	0.974824
132	O94910	ADGRL1	Adhesion G protein-coupled receptor L1 OS=Homo sapiens OX=9606 GN=ADGRL1 PE=1 SV=1			1	24.7017	21.3741	43.5561	40.4182	58.2596	79.1954	52.0863	48.1236	215.088	143.276	102.187	143.309	136.204	96.0759	125.286	96.2557		0.227533	0.196881	0.401205	0.372301	0.536642	0.729486	0.479778	0.443277	1.98122	1.31975	0.941266	1.32005	1.2546	0.884976	1.15404	0.886632		0.865289	1.35935	0.666127	0.705382	0.927957	0.92392	1.40242	0.768288
133	O95490	ADGRL2	Adhesion G protein-coupled receptor L2 OS=Homo sapiens OX=9606 GN=ADGRL2 PE=1 SV=2			6	112.66	56.5405	264.195	327.236	369.654	422.791	485.115	398.667	1152.12	645.756	858.798	1181.06	1153.86	793.526	936.748	877.041		0.161619	0.0811112	0.379006	0.469443	0.530294	0.606523	0.695931	0.571915	1.6528	0.926382	1.232	1.69431	1.65529	1.13837	1.34383	1.25818		0.501868	1.14375	0.560494	0.687714	1.23862	0.821799	1.37525	0.936261
134	Q9HAR2	ADGRL3	Adhesion G protein-coupled receptor L3 OS=Homo sapiens OX=9606 GN=ADGRL3 PE=1 SV=2			3	38.7057	22.2674	73.4335	99.641	87.492	134.529	134.168	111.132	372.465	216.258	268.893	391.119	308.516	260.273	273.951	259.277		0.191807	0.110347	0.363902	0.493774	0.433569	0.666663	0.664874	0.550718	1.84576	1.07167	1.33251	1.9382	1.52886	1.28979	1.35757	1.28486		0.5753	1.53761	0.580613	0.843629	1.35689	0.828305	1.45455	0.946436
135	Q8WXG9	ADGRV1	Adhesion G-protein coupled receptor V1 OS=Homo sapiens OX=9606 GN=ADGRV1 PE=1 SV=2			3	27.8798	24.1953	57.3632	48.1772	120.939	112.993	125.125	99.7123	175.347	114.341	154.614	201.573	157.606	107.749	146.561	172.221		0.231477	0.200886	0.476269	0.4	1.00412	0.938145	1.03887	0.82788	1.45585	0.949337	1.28371	1.6736	1.30855	0.894606	1.21685	1.4299		0.867843	0.934297	0.652084	0.683661	0.839862	0.796901	1.30372	1.17508
136	P11766	ADH5	Alcohol dehydrogenase class-3 OS=Homo sapiens OX=9606 GN=ADH5 PE=1 SV=4			3	472.544	334.434	809.916	655.884	1218.85	1304.63	1449.47	1193.44	1535.81	1096.45	1503.12	2101.38	1382.76	1017.72	1312.82	1513.89		0.41002	0.290184	0.702753	0.569101	1.05758	1.13201	1.25768	1.03553	1.3326	0.951374	1.30424	1.82334	1.1998	0.883061	1.13912	1.31358		0.707731	1.07038	0.713923	0.736006	0.809817	0.823363	1.39801	1.15316
137	Q96A54	ADIPOR1	Adiponectin receptor protein 1 OS=Homo sapiens OX=9606 GN=ADIPOR1 PE=1 SV=1			2	68.7164	81.528	420.758	432.24	144.736	247.054	274.399	294.755	285.863	234.269	282.975	555.162	314.688	279.234	494.833	545.678		0.337671	0.400627	2.0676	2.12402	0.71123	1.21402	1.34839	1.44842	1.40473	1.15119	1.39053	2.72806	1.54637	1.37215	2.4316	2.68145		1.18644	1.70693	0.819515	0.887336	1.02729	1.07418	1.96188	1.10275
138	P55263	ADK	Adenosine kinase OS=Homo sapiens OX=9606 GN=ADK PE=1 SV=2			2	191.286	178.308	207.044	181.568	381.182	447.687	387.167	222.439	659.557	428.999	373.938	696.864	483.165	433.568	337.321	343.336		0.446099	0.415833	0.482848	0.423435	0.888956	1.04405	0.902913	0.518751	1.53815	1.00047	0.872062	1.62516	1.12679	1.01113	0.786667	0.800695		0.932154	1.17447	0.650435	0.89735	0.876954	0.57453	1.86358	1.01783
139	Q9H2P0	ADNP	Activity-dependent neuroprotector homeobox protein OS=Homo sapiens OX=9606 GN=ADNP PE=1 SV=1			5	678.69	423.138	823.364	621.448	1753.94	1605.72	1505.92	1298.95	2007.15	1531.95	2100.97	1985.11	2662.81	1652.61	2715.89	2077.67		0.382221	0.238301	0.463698	0.349984	0.987775	0.904301	0.848096	0.731536	1.13038	0.862756	1.18321	1.11796	1.49963	0.930708	1.52952	1.17009		0.623463	0.915493	0.763246	0.620626	0.754767	0.862562	0.944854	0.765005
140	Q6IQ32	ADNP2	Activity-dependent neuroprotector homeobox protein 2 OS=Homo sapiens OX=9606 GN=ADNP2 PE=1 SV=1			5	263.408	189.514	379.009	295.048	675	662.318	632.534	521.873	744.117	591.394	750.637	823.299	862.168	635.731	977.819	825.381		0.414051	0.297897	0.595764	0.463786	1.06103	1.0411	0.994279	0.820332	1.16968	0.929612	1.17993	1.29414	1.35524	0.999305	1.53703	1.29742		0.719469	0.981212	0.794759	0.737363	0.778472	0.825051	1.0968	0.844104
141	Q96SZ5	ADO	2-aminoethanethiol dioxygenase OS=Homo sapiens OX=9606 GN=ADO PE=1 SV=2			1	16.1468	22.3426	30.3327	24.0063	33.5744	53.5034	44.5497	38.3535	58.0434	33.6076	45.7645	78.229	43.3169	57.9991	50.8061	41.4254		0.427499	0.591538	0.803082	0.635585	0.888908	1.41654	1.17949	1.01544	1.53674	0.889787	1.21165	2.07117	1.14685	1.53557	1.34513	1.09677		1.38372	1.59358	0.579008	1.33895	0.791433	0.860915	1.70938	0.815363
142	Q9BRR6	ADPGK	ADP-dependent glucokinase OS=Homo sapiens OX=9606 GN=ADPGK PE=1 SV=1			1	12.2158	6.47002	20.5264	23.0334	41.9438	56.7612	63.1564	45.0586	89.9052	67.6493	93.2779	145.816	74.9374	62.9121	78.2528	89.3326		0.223117	0.118173	0.374908	0.420697	0.766089	1.03672	1.15353	0.82298	1.64209	1.23559	1.70369	2.66328	1.36871	1.14907	1.42926	1.63163		0.529644	1.35327	0.752451	0.839529	1.12214	0.713445	1.56324	1.14159
143	Q8NDY3	ADPRHL1	[Protein ADP-ribosylarginine] hydrolase-like protein 1 OS=Homo sapiens OX=9606 GN=ADPRHL1 PE=2 SV=1			1	5.63665	8.11763	17.2415	14.9619	16.9247	24.1511	35.2668	30.4194	39.2136	29.4354	50.4804	67.0348	22.9266	23.0317	77.1967	44.9132		0.266189	0.383352	0.814224	0.70657	0.799263	1.14053	1.66546	1.43655	1.85185	1.39008	2.38392	3.16569	1.0827	1.08766	3.64559	2.12101		1.44015	1.42697	0.750643	1.00458	0.867784	0.862551	1.32794	0.581802
144	P30566	ADSL	Adenylosuccinate lyase OS=Homo sapiens OX=9606 GN=ADSL PE=1 SV=2			9	258.289	236.275	275.162	289.171	1051.31	1081.94	717.061	765.982	1629.12	1491.71	1099.38	1434.2	1135.5	1258.45	1791.87	1319.13		0.253584	0.231971	0.270149	0.283903	1.03216	1.06223	0.703998	0.752028	1.59944	1.46454	1.07935	1.40807	1.11481	1.23553	1.75923	1.2951		0.91477	1.02914	0.915654	1.10828	1.05091	1.06822	1.30455	0.736175
145	P30520	ADSS	Adenylosuccinate synthetase isozyme 2 OS=Homo sapiens OX=9606 GN=ADSS PE=1 SV=3			7	475.116	378.423	621.287	504.967	1369.04	1415.37	1134.8	1103.98	1757.21	1525.37	1650.11	1653.82	1862.45	1341.78	2023.25	1590.98		0.347827	0.277039	0.454837	0.369681	1.00226	1.03618	0.830775	0.808212	1.28643	1.11671	1.20803	1.21074	1.36348	0.982302	1.4812	1.16474		0.796485	1.03384	0.868064	0.720438	0.812776	0.972841	1.00225	0.786349
146	Q08117	AES	Amino-terminal enhancer of split OS=Homo sapiens OX=9606 GN=AES PE=1 SV=4			1	14.4492	13.0712	14.3544	20.0285	63.0841	57.8668	39.4549	53.7473	60.8044	61.0981	64.2652	75.1891	61.7725	58.7085	89.0097	68.7912		0.288825	0.26128	0.28693	0.400349	1.26099	1.1567	0.788663	1.07435	1.21542	1.22129	1.2846	1.50295	1.23477	1.17352	1.77921	1.37507		0.904631	0.917296	1.00483	0.950399	1.39529	1.36225	1.16998	0.772851
147	P55196	AFDN	Afadin OS=Homo sapiens OX=9606 GN=AFDN PE=1 SV=3			21	1246.64	1125.37	1699.32	1458.42	4636.28	4771.05	3654.08	3716.83	5396.06	4508.99	4743.13	5033.29	5629.51	4319.53	5845.83	5157.26		0.294915	0.266226	0.402004	0.345015	1.09679	1.12868	0.864437	0.879281	1.27653	1.06668	1.12207	1.19071	1.33176	1.02186	1.38293	1.22004		0.902723	1.02907	0.835608	0.767301	0.858237	1.01717	1.06117	0.882212
148	P51825	AFF1	AF4/FMR2 family member 1 OS=Homo sapiens OX=9606 GN=AFF1 PE=1 SV=1			2	86.1305	53.0381	103.165	73.1982	187.186	166.876	172.676	128.112	192.284	97.7793	182.46	174.768	342.524	185.487	249.995	186.902		0.426323	0.262524	0.510639	0.362312	0.926521	0.825992	0.8547	0.63412	0.951754	0.483981	0.903128	0.865055	1.6954	0.918111	1.23741	0.925115		0.615788	0.891498	0.508515	0.54153	0.709526	0.741921	0.957843	0.747623
149	P51816	AFF2	AF4/FMR2 family member 2 OS=Homo sapiens OX=9606 GN=AFF2 PE=1 SV=4			1	10.7991	7.959	25.9543	13.8231	44.1048	27.6871	30.3897	29.1864	12.9587	18.8934	29.352	22.7207	38.779	24.3898	47.7864	31.6373		0.405061	0.298533	0.973515	0.518488	1.65432	1.03851	1.13988	1.09475	0.486065	0.708669	1.10096	0.852227	1.45455	0.914832	1.79241	1.18668		0.737006	0.627757	1.45797	0.628944	0.532594	0.960404	0.774077	0.662057
150	P51826	AFF3	AF4/FMR2 family member 3 OS=Homo sapiens OX=9606 GN=AFF3 PE=1 SV=3			2	34.4852	16.6279	46.1089	36.2472	96.583	84.2111	84.217	75.0554	94.7962	69.557	113.161	105.601	123.197	85.1298	121.901	105.001		0.395176	0.190544	0.528376	0.415368	1.10677	0.965	0.965068	0.860082	1.0863	0.797075	1.29675	1.21011	1.41175	0.975528	1.3969	1.20324		0.482175	0.871904	0.733753	0.691005	0.786122	0.891214	0.933193	0.861363
151	Q9UHB7	AFF4	AF4/FMR2 family member 4 OS=Homo sapiens OX=9606 GN=AFF4 PE=1 SV=1			2	282.369	169.423	352.646	354.817	295.005	427.763	486.601	355.264	507.091	415.444	647.843	735.884	1025.84	729.901	906.971	824.382		0.535219	0.321135	0.668427	0.672542	0.55917	0.810808	0.922333	0.673389	0.961171	0.787458	1.22796	1.39484	1.94444	1.3835	1.71913	1.56258		0.600006	1.45002	0.819269	0.711515	1.00616	0.730093	1.1359	0.90894
152	Q8WV93	AFG1L	AFG1-like ATPase OS=Homo sapiens OX=9606 GN=AFG1L PE=1 SV=2			2	17.4879	12.5874	21.4378	24.8531	76.985	70.1699	68.6652	62.9088	83.3804	53.6727	88.374	103.213	81.8565	64.3315	145.583	108.796		0.269345	0.193869	0.330181	0.382783	1.18571	1.08074	1.05757	0.968909	1.28421	0.826657	1.36112	1.58967	1.26074	0.990821	2.24224	1.67565		0.719778	0.911475	0.643709	0.785906	1.15931	0.916167	1.16791	0.747313
153	Q9Y4W6	AFG3L2	AFG3-like protein 2 OS=Homo sapiens OX=9606 GN=AFG3L2 PE=1 SV=2			10	286.958	194.948	663.185	1305.08	670.019	1275.95	4048.14	1497.2	1930.45	1124.3	4898.9	6259.71	2940.92	2865.64	3791.66	4125.09		0.19694	0.133793	0.455144	0.895678	0.459835	0.875686	2.77824	1.02753	1.32487	0.771608	3.36212	4.29604	2.01836	1.96669	2.60222	2.83105		0.679361	1.90435	0.582403	0.974403	1.9679	0.369849	1.27778	1.08794
154	Q6ULP2	AFTPH	Aftiphilin OS=Homo sapiens OX=9606 GN=AFTPH PE=1 SV=3			6	89.0734	92.5321	118.81	116.991	297.186	322.842	250.278	261.573	343.095	291.528	353.497	379.372	309.319	290.762	404.869	324.693		0.343028	0.356347	0.457545	0.45054	1.14448	1.24329	0.963837	1.00733	1.32128	1.12269	1.36134	1.46099	1.19121	1.11974	1.55918	1.25041		1.03883	1.08633	0.849701	0.940007	0.98469	1.04513	1.0732	0.801971
155	Q9UPQ3	AGAP1	Arf-GAP with GTPase, ANK repeat and PH domain-containing protein 1 OS=Homo sapiens OX=9606 GN=AGAP1 PE=1 SV=4			3	185.892	166.254	258.546	223.349	495.629	618.08	498.976	523.538	807.784	660.805	712.852	841.582	660.186	543.023	889.862	756.781		0.345927	0.309383	0.48113	0.415631	0.922319	1.15019	0.928547	0.974255	1.50321	1.2297	1.32655	1.5661	1.22854	1.01051	1.65595	1.4083		0.894358	1.24706	0.818047	0.82253	0.863866	1.04922	1.18058	0.850448
156	Q96P47	AGAP3	Arf-GAP with GTPase, ANK repeat and PH domain-containing protein 3 OS=Homo sapiens OX=9606 GN=AGAP3 PE=1 SV=2			4	246.234	191.594	271.759	248.001	729.135	828.426	599.406	620.116	1074.01	898.652	786.097	900.464	839.605	721.597	968.344	846.59		0.340928	0.265275	0.376269	0.343375	1.00954	1.14701	0.829919	0.858594	1.48704	1.24425	1.08841	1.24676	1.16249	0.999101	1.34074	1.17216		0.778097	1.13618	0.836726	0.859448	0.912577	1.03455	1.14549	0.874266
157	Q5VTM2	AGAP9	Arf-GAP with GTPase, ANK repeat and PH domain-containing protein 9 OS=Homo sapiens OX=9606 GN=AGAP9 PE=3 SV=2			1	50.1439	27.2109	20.4568	18.041	22.6334	41.8817	16.9235	14.9275	24.3239	21.101	18.3193	44.6693	45.8357	22.9703	35.7332	22.5318		1.40325	0.76148	0.572471	0.504866	0.633382	1.17203	0.473594	0.417737	0.680689	0.590498	0.512654	1.25004	1.28268	0.64281	0.999971	0.630538		0.542656	1.85044	0.867501	0.501144	0.881907	0.882057	2.43837	0.630556
158	Q8NDL9	AGBL5	Cytosolic carboxypeptidase-like protein 5 OS=Homo sapiens OX=9606 GN=AGBL5 PE=1 SV=1			1	18.8121	10.8138	46.5025	46.194	50.2654	58.5729	54.1336	54.119	51.1236	36.2384	60.8824	75.7807	57.4426	42.6583	81.75	67.7151		0.423592	0.243494	1.0471	1.04015	1.13183	1.31888	1.21893	1.2186	1.15115	0.815979	1.37089	1.70635	1.29343	0.960536	1.84076	1.52474		0.574832	1.16527	0.708839	0.742625	0.993366	0.99973	1.24471	0.828319
159	P52594	AGFG1	Arf-GAP domain and FG repeat-containing protein 1 OS=Homo sapiens OX=9606 GN=AGFG1 PE=1 SV=2			2	18.069	18.4377	36.5468	24.765	62.0104	67.72	57.0748	53.3431	81.4204	67.1995	74.104	95.1734	80.1286	52.0957	68.2252	77.1228		0.29912	0.305224	0.605008	0.409968	1.02654	1.12106	0.944836	0.88306	1.34786	1.11244	1.22674	1.57553	1.32648	0.86241	1.12942	1.27672		1.02041	1.09207	0.82534	0.650151	0.677624	0.934617	1.28432	1.13042
160	O95081	AGFG2	Arf-GAP domain and FG repeat-containing protein 2 OS=Homo sapiens OX=9606 GN=AGFG2 PE=1 SV=2			1	5.92421	7.68699	6.5846	6.75028	10.3021	18.1308	13.7781	10.8797	16.4477	15.0846	19.2602	21.4708	25.4967	21.2674	26.363	22.0439		0.407367	0.528581	0.452778	0.46417	0.708405	1.24673	0.947425	0.748122	1.131	1.03726	1.32439	1.4764	1.75323	1.46241	1.8128	1.51581		1.29756	1.75991	0.917125	0.834124	1.02516	0.789637	1.11478	0.836168
161	Q8N302	AGGF1	Angiogenic factor with G patch and FHA domains 1 OS=Homo sapiens OX=9606 GN=AGGF1 PE=1 SV=2			3	64.3635	58.8774	107.462	85.2544	190.488	210.679	204.619	221.731	204.714	162.273	272.885	297.264	245.25	191.499	330.65	272.922		0.365279	0.334144	0.609873	0.48384	1.08107	1.19565	1.16126	1.25838	1.1618	0.920939	1.54869	1.68705	1.39185	1.0868	1.87652	1.5489		0.914764	1.106	0.792681	0.780832	0.793345	1.08363	1.08934	0.825411
162	Q53H12	AGK	Acylglycerol kinase, mitochondrial OS=Homo sapiens OX=9606 GN=AGK PE=1 SV=2			6	134.362	95.7379	306.5	955.811	469.582	725.833	2715.02	719.134	1222.35	682.267	2873.91	3646.93	2190.42	2269.52	2061.63	2429.8		0.133803	0.0953395	0.305225	0.951834	0.467628	0.722813	2.70372	0.716142	1.21726	0.679428	2.86195	3.63175	2.18131	2.26008	2.05305	2.41969		0.712537	1.5457	0.55816	1.03611	3.11847	0.264872	1.26898	1.17858
163	P35573	AGL	Glycogen debranching enzyme OS=Homo sapiens OX=9606 GN=AGL PE=1 SV=3			10	172.012	143.142	226.495	191.261	603.303	595.358	526.683	482.084	775.076	650.858	664.953	761.306	697.827	552.727	736.042	658.609		0.306041	0.254676	0.402977	0.340289	1.07339	1.05925	0.937067	0.857718	1.37901	1.158	1.18308	1.35451	1.24156	0.983405	1.30956	1.17179		0.832163	0.986831	0.839734	0.792069	0.844438	0.915321	1.1449	0.894798
164	Q9UL18	AGO1	Protein argonaute-1 OS=Homo sapiens OX=9606 GN=AGO1 PE=1 SV=3			6	232.323	215.373	344.719	279.356	457.745	608.184	501.891	439.535	577.582	515.913	497.069	650.15	614.234	430.604	556.561	607.798		0.493809	0.457782	0.73271	0.593779	0.972951	1.29271	1.06678	0.934245	1.22767	1.09659	1.05653	1.38191	1.30557	0.915262	1.18299	1.29189		0.927041	1.32865	0.893229	0.701042	0.810388	0.875758	1.30797	1.09206
165	Q9UKV8	AGO2	Protein argonaute-2 OS=Homo sapiens OX=9606 GN=AGO2 PE=1 SV=3			5	382.981	377.585	588.026	513.76	721.8	1012.91	832.81	765.622	898.893	849.333	830.46	1070.78	991.649	776.04	1000.01	1095.94		0.511439	0.504233	0.785259	0.686083	0.963903	1.35266	1.11215	1.02242	1.2004	1.13421	1.10901	1.42994	1.32426	1.03634	1.33543	1.46353		0.985911	1.40331	0.944866	0.782575	0.873703	0.919324	1.28938	1.09593
166	Q9H9G7	AGO3	Protein argonaute-3 OS=Homo sapiens OX=9606 GN=AGO3 PE=1 SV=2			4	86.3087	76.6918	116.198	102.691	155.895	197.957	158.692	148.704	176.017	158.461	152.387	199.914	208.775	162.493	198.744	213.171		0.550617	0.489265	0.7413	0.65513	0.994552	1.26289	1.0124	0.948676	1.12292	1.01092	0.972173	1.27538	1.33191	1.03665	1.26791	1.35995		0.888576	1.26981	0.90026	0.778316	0.883759	0.93706	1.31188	1.07259
167	Q9HCK5	AGO4	Protein argonaute-4 OS=Homo sapiens OX=9606 GN=AGO4 PE=1 SV=2			5	372.397	368.159	666.601	523.634	833.059	986.357	905.791	803.199	795.817	831.221	780.915	1045.15	990.092	718.508	897.42	1076.74		0.497963	0.492296	0.891367	0.700194	1.11395	1.31894	1.21121	1.07402	1.06415	1.11149	1.04423	1.39756	1.32393	0.960776	1.20001	1.4398		0.98862	1.18402	1.04449	0.725698	0.785528	0.886738	1.33837	1.19982
168	Q99943	AGPAT1	1-acyl-sn-glycerol-3-phosphate acyltransferase alpha OS=Homo sapiens OX=9606 GN=AGPAT1 PE=1 SV=2			3	41.4733	45.249	64.8759	59.3715	166.924	216.387	191.143	161.474	330.039	258.609	290.132	346.489	229.627	191.003	281.354	203.684		0.215989	0.235652	0.337867	0.309201	0.869324	1.12692	0.995454	0.840941	1.71881	1.34681	1.51098	1.80448	1.19588	0.994725	1.46526	1.06077		1.09104	1.29632	0.783571	0.831797	0.915155	0.844781	1.19425	0.723942
169	Q9NRZ7	AGPAT3	1-acyl-sn-glycerol-3-phosphate acyltransferase gamma OS=Homo sapiens OX=9606 GN=AGPAT3 PE=1 SV=1			2	113.3	81.0447	131.787	111.574	346.826	417.48	307.51	276.772	523.408	382.281	370.761	640.021	404.218	286.712	378.729	449.417		0.326571	0.2336	0.379857	0.321596	0.999677	1.20333	0.886354	0.797756	1.50865	1.10187	1.06867	1.84477	1.1651	0.826407	1.09163	1.29538		0.715311	1.20372	0.730369	0.7093	0.846624	0.900042	1.72624	1.18665
170	Q9NRZ5	AGPAT4	1-acyl-sn-glycerol-3-phosphate acyltransferase delta OS=Homo sapiens OX=9606 GN=AGPAT4 PE=1 SV=1			1	7.89968	7.58195	16.5933	18.3661	25.6712	17.5791	32.5809	17.7257	53.2388	29.9418	38.1647	65.349	52.0414	38.1941	45.4459	43.9298		0.227573	0.21842	0.478017	0.529088	0.739532	0.506416	0.938585	0.510639	1.53369	0.862559	1.09944	1.88256	1.4992	1.10029	1.3092	1.26552		0.959779	0.684779	0.562406	0.733918	1.10684	0.544052	1.71229	0.966639
171	O00116	AGPS	Alkyldihydroxyacetonephosphate synthase, peroxisomal OS=Homo sapiens OX=9606 GN=AGPS PE=1 SV=1			10	649.981	469.075	774.325	990.588	2597.29	2602.58	2272.72	2085.53	3245.63	2468.25	2849.92	3538.46	3609.46	3077.36	3489.53	3365.96		0.257358	0.185729	0.306592	0.39222	1.02839	1.03048	0.899877	0.825759	1.2851	0.977296	1.12842	1.40104	1.42916	1.21847	1.38167	1.33274		0.721675	1.00204	0.760484	0.852582	1.27929	0.917636	1.2416	0.964588
172	O00468	AGRN	Agrin OS=Homo sapiens OX=9606 GN=AGRN PE=1 SV=6			6	169.127	151.629	225.995	206.271	391.67	487.425	394.539	393.223	672.22	532.236	496.102	657.394	516.638	382.153	490.158	510.694		0.386652	0.346649	0.516662	0.47157	0.895422	1.11433	0.901981	0.898973	1.53681	1.21678	1.13417	1.50291	1.18112	0.873665	1.12058	1.16753		0.896539	1.24448	0.791759	0.739692	0.912724	0.996664	1.32512	1.0419
173	Q9UPW5	AGTPBP1	Cytosolic carboxypeptidase 1 OS=Homo sapiens OX=9606 GN=AGTPBP1 PE=1 SV=3			7	158.051	116.18	221.275	183.608	452.163	450.508	379.609	382.036	513.699	437.132	502.774	530.672	572.234	402.519	641.899	552.525		0.372729	0.273986	0.52183	0.433	1.06633	1.06243	0.895227	0.90095	1.21145	1.03088	1.18568	1.25148	1.34949	0.949255	1.51378	1.30301		0.735079	0.99634	0.85095	0.703417	0.829773	1.00639	1.05549	0.860766
174	Q6RW13	AGTRAP	Type-1 angiotensin II receptor-associated protein OS=Homo sapiens OX=9606 GN=AGTRAP PE=1 SV=1			2	40.1145	29.0681	60.0241	68.8892	101.729	147.311	174.102	117.31	442.341	205.595	197.789	548.214	415.942	243.696	227.292	283.881		0.160438	0.116258	0.240066	0.275522	0.406865	0.589169	0.69632	0.469181	1.76914	0.822276	0.791056	2.19258	1.66356	0.974661	0.909053	1.13538		0.724628	1.44807	0.464788	0.585889	1.14769	0.6738	2.77171	1.24897
175	Q8WYP5	AHCTF1	Protein ELYS OS=Homo sapiens OX=9606 GN=AHCTF1 PE=1 SV=3			5	341.662	268.299	442.208	346.167	565.38	570.313	515.379	396.57	585.114	477.54	555.162	565.883	1115.21	664.198	876.892	657.227		0.524149	0.411602	0.678398	0.53106	0.867358	0.874926	0.790651	0.608384	0.897632	0.732601	0.851683	0.86813	1.71086	1.01896	1.34525	1.00826		0.785276	1.00873	0.816149	0.595581	0.782815	0.769473	1.01931	0.749496
176	P23526	AHCY	Adenosylhomocysteinase OS=Homo sapiens OX=9606 GN=AHCY PE=1 SV=4			4	539.473	440.709	744.241	715.734	920.012	1376.48	1300.2	1107.38	1768.09	1270.32	1445.24	2585.08	935.743	991.695	1261.11	1396.61		0.518311	0.423421	0.715046	0.687657	0.883922	1.32248	1.2492	1.06394	1.69873	1.22049	1.38855	2.48367	0.899036	0.952793	1.21164	1.34182		0.816925	1.49615	0.71847	1.05979	0.961697	0.8517	1.78869	1.10745
177	Q96HN2	AHCYL2	Adenosylhomocysteinase 3 OS=Homo sapiens OX=9606 GN=AHCYL2 PE=1 SV=1			4	161.182	162.502	254.272	228.947	475.16	538.245	436.349	392.881	665.974	532.201	508.383	735.623	561.386	436.998	474.034	532.823		0.345939	0.348772	0.545735	0.491381	1.01982	1.15522	0.936521	0.843227	1.42936	1.14224	1.09113	1.57884	1.20488	0.937914	1.0174	1.14358		1.00819	1.13277	0.799132	0.778427	0.900402	0.900382	1.44699	1.12402
178	Q8N157	AHI1	Jouberin OS=Homo sapiens OX=9606 GN=AHI1 PE=1 SV=1			2	242.289	206.109	351.687	312.989	578.395	594.447	611.35	514.803	929.273	805.483	816.236	802.426	848.109	579.381	966.336	746.581		0.37303	0.317327	0.54146	0.48188	0.890501	0.915215	0.941239	0.792594	1.43072	1.24013	1.25668	1.23542	1.30575	0.892019	1.48778	1.14944		0.850674	1.02775	0.866788	0.683145	0.889965	0.842076	0.983081	0.772589
179	Q09666	AHNAK	Neuroblast differentiation-associated protein AHNAK OS=Homo sapiens OX=9606 GN=AHNAK PE=1 SV=2			21	942.5	964.04	1116.18	1160.1	3779.23	4386.72	2794.08	3001.24	6720.21	5837.69	4080.04	4842.43	4763.1	4213.03	4839.63	4081.78		0.232644	0.237961	0.275514	0.286355	0.932853	1.0828	0.689682	0.740816	1.6588	1.44096	1.0071	1.19529	1.17571	1.03993	1.1946	1.00753		1.02285	1.16074	0.868677	0.884514	1.03935	1.07414	1.18686	0.843407
180	Q8IVF2	AHNAK2	Protein AHNAK2 OS=Homo sapiens OX=9606 GN=AHNAK2 PE=1 SV=2			5	150.588	152.729	197.836	253.153	604.953	821.011	588.54	543.021	1564.42	1418.72	928.84	1307.85	948.21	977.832	932.615	870.389		0.184309	0.186929	0.242137	0.309841	0.740418	1.00486	0.72033	0.664618	1.91473	1.73641	1.13683	1.60071	1.16054	1.19679	1.14145	1.06529		1.01422	1.35715	0.906866	1.03124	1.27961	0.922658	1.40805	0.933278
181	O95433	AHSA1	Activator of 90 kDa heat shock protein ATPase homolog 1 OS=Homo sapiens OX=9606 GN=AHSA1 PE=1 SV=1			9	659.778	491.052	767.401	772.535	1613.39	1941.66	1594.64	1401.82	1909.3	1719.79	1569.71	2308.92	1703.45	1493.85	1560.74	1913.47		0.448377	0.333713	0.521517	0.525006	1.09644	1.31953	1.0837	0.95266	1.29754	1.16875	1.06676	1.56911	1.15764	1.0152	1.06066	1.30037		0.744269	1.20347	0.900744	0.876956	1.00669	0.879082	1.47092	1.226
182	Q96BJ3	AIDA	Axin interactor, dorsalization-associated protein OS=Homo sapiens OX=9606 GN=AIDA PE=1 SV=1			1	7.61468	7.85177	20.286	20.2663	18.6529	31.6885	32.9985	25.4067	32.5388	22.0281	36.6024	57.1849	28.4294	24.3577	37.4077	33.0564		0.349154	0.360025	0.930169	0.929265	0.855287	1.453	1.51307	1.16497	1.49199	1.01005	1.67832	2.62208	1.30357	1.11687	1.71525	1.51573		1.03114	1.69885	0.676979	0.856779	0.999029	0.769935	1.56233	0.883679
183	O95831	AIFM1	Apoptosis-inducing factor 1, mitochondrial OS=Homo sapiens OX=9606 GN=AIFM1 PE=1 SV=1			12	495.711	422.609	696.66	847.972	1505.4	1862.22	2104.11	1511.84	2149.9	1663.93	2532.94	2908.9	2374.25	2121.42	2558.07	2377.72		0.303872	0.25906	0.427054	0.519809	0.922814	1.14155	1.28982	0.926761	1.31789	1.01999	1.5527	1.78316	1.45542	1.30044	1.5681	1.45755		0.852531	1.23703	0.773957	0.893512	1.2172	0.718518	1.14843	0.929498
184	Q9BRQ8	AIFM2	Apoptosis-inducing factor 2 OS=Homo sapiens OX=9606 GN=AIFM2 PE=1 SV=1			3	104.459	67.5567	102.762	95.3348	386.149	404.824	219.019	196.334	347.194	355.395	226.579	315.43	399.083	337.799	239.224	298.827		0.337813	0.218474	0.332325	0.308306	1.24878	1.30917	0.708292	0.63493	1.1228	1.14932	0.732741	1.02008	1.29061	1.09242	0.773634	0.966386		0.646729	1.04836	1.02362	0.846438	0.927724	0.896425	1.39214	1.24915
185	Q9NVV5	AIG1	Androgen-induced gene 1 protein OS=Homo sapiens OX=9606 GN=AIG1 PE=1 SV=2			1	26.6322	26.4284	59.7963	50.8358	91.7193	137.496	123.513	114.629	247.022	123.385	161.987	456.183	187.586	160.281	198.126	182.427		0.192652	0.191178	0.432555	0.367736	0.663479	0.994619	0.893469	0.829204	1.78691	0.892543	1.17178	3.29994	1.35696	1.15944	1.4332	1.31964		0.992348	1.4991	0.49949	0.85444	0.85015	0.928072	2.81617	0.920763
186	Q12904	AIMP1	Aminoacyl tRNA synthase complex-interacting multifunctional protein 1 OS=Homo sapiens OX=9606 GN=AIMP1 PE=1 SV=2			9	560.755	515.626	879.17	730.006	1627.63	1703.85	1487.08	1413.68	2027.74	1689.11	1746.87	1784.34	2114.25	1536.52	2104.18	1840.73		0.354327	0.325811	0.555525	0.461272	1.02846	1.07662	0.939647	0.893268	1.28128	1.0673	1.1038	1.12748	1.33594	0.970887	1.32958	1.16311		0.919521	1.04683	0.833001	0.726745	0.830335	0.950642	1.02145	0.874797
187	Q13155	AIMP2	Aminoacyl tRNA synthase complex-interacting multifunctional protein 2 OS=Homo sapiens OX=9606 GN=AIMP2 PE=1 SV=2			5	38.5014	33.7494	64.6918	52.8281	116.867	129.796	110.214	93.4638	144.437	126.107	110.809	130.51	136.68	129.244	166.272	131.161		0.352831	0.309283	0.592843	0.484122	1.07098	1.18946	1.01001	0.856512	1.32364	1.15566	1.01547	1.19601	1.25255	1.18441	1.52373	1.20197		0.876576	1.11063	0.873093	0.945596	0.816612	0.848021	1.17779	0.788834
188	O00170	AIP	AH receptor-interacting protein OS=Homo sapiens OX=9606 GN=AIP PE=1 SV=2			4	48.206	37.1075	94.4646	67.4496	225.534	225.809	242.789	222.334	412.352	277.106	356.699	429.095	244.346	199.267	408.027	293.289		0.20724	0.159527	0.406108	0.289969	0.969582	0.970764	1.04376	0.955825	1.77272	1.19129	1.53347	1.8447	1.05046	0.856659	1.75413	1.26086		0.769769	1.00122	0.672013	0.815512	0.71402	0.91575	1.20296	0.718798
189	P00568	AK1	Adenylate kinase isoenzyme 1 OS=Homo sapiens OX=9606 GN=AK1 PE=1 SV=3			1	21.9403	18.7454	24.6589	21.2392	52.4086	65.1755	57.1776	51.9407	110.533	76.5311	78.2167	140.575	53.4632	58.3973	69.058	81.5349		0.368211	0.314593	0.413835	0.356445	0.879541	1.0938	0.959577	0.871689	1.85501	1.28437	1.31266	2.35918	0.89724	0.980046	1.15896	1.36835		0.854382	1.2436	0.692382	1.09229	0.86132	0.90841	1.79725	1.18067
190	P54819	AK2	Adenylate kinase 2, mitochondrial OS=Homo sapiens OX=9606 GN=AK2 PE=1 SV=2			3	517.11	623.975	797.344	852.796	1138.26	1477.03	1892.3	1099.49	2606.73	1678.25	2394.92	3710.05	2089.72	2430.41	2718.57	2064.64		0.325645	0.392942	0.50212	0.53704	0.716809	0.930146	1.19166	0.692394	1.64156	1.05686	1.50818	2.33637	1.31598	1.53053	1.71199	1.30019		1.20666	1.29762	0.643814	1.16303	1.06955	0.581034	1.54913	0.759458
191	Q9UIJ7	AK3	GTP:AMP phosphotransferase AK3, mitochondrial OS=Homo sapiens OX=9606 GN=AK3 PE=1 SV=4			1	15.8533	19.7437	28.0118	22.6694	26.6955	32.3626	39.6994	28.8556	59.9288	29.7763	56.8346	105.668	34.7964	41.8962	46.6519	41.3024		0.461946	0.575308	0.81623	0.660559	0.777875	0.943007	1.15679	0.840818	1.74625	0.867646	1.65609	3.07904	1.01393	1.22081	1.35938	1.2035		1.2454	1.21229	0.496861	1.20404	0.80928	0.726852	1.85922	0.885332
192	Q9Y6K8	AK5	Adenylate kinase isoenzyme 5 OS=Homo sapiens OX=9606 GN=AK5 PE=1 SV=2			2	32.0893	31.6223	88.6226	76.167	161.657	188.999	231.583	244.811	218.19	203.363	258.536	354.244	124.108	91.2882	316.021	292.348		0.239453	0.235968	0.661308	0.568363	1.2063	1.41032	1.72809	1.8268	1.62815	1.51751	1.92921	2.64339	0.926103	0.681199	2.35817	2.18152		0.985447	1.16914	0.932045	0.735555	0.859453	1.05712	1.37019	0.92509
193	Q9Y3D8	AK6	Adenylate kinase isoenzyme 6 OS=Homo sapiens OX=9606 GN=AK6 PE=1 SV=1			3	64.84	74.3737	64.5482	76.8446	279.506	278.785	185.397	199.711	283.616	263.745	179.592	309.717	257.007	265.053	324.9	309.147		0.293072	0.336164	0.291753	0.347332	1.26335	1.26009	0.837982	0.90268	1.28193	1.19211	0.811744	1.3999	1.16165	1.19802	1.46853	1.39732		1.14703	0.99742	0.929937	1.03131	1.1905	1.07721	1.72456	0.951514
194	Q92667	AKAP1	A-kinase anchor protein 1, mitochondrial OS=Homo sapiens OX=9606 GN=AKAP1 PE=1 SV=1			12	275.465	232.994	584.342	1403.14	759.671	1438.07	3815.65	1250.62	2574.01	1349.9	4161.6	5598.59	4210	3630.95	3676.42	3687.1		0.140918	0.119192	0.298929	0.717797	0.388621	0.735666	1.95195	0.639773	1.31677	0.690561	2.12893	2.86404	2.15369	1.85747	1.88073	1.88619		0.845821	1.89302	0.524435	0.862458	2.40123	0.327761	1.3453	1.0029
195	O43572	AKAP10	A-kinase anchor protein 10, mitochondrial OS=Homo sapiens OX=9606 GN=AKAP10 PE=1 SV=2			1	2.82207	4.07637	9.57742	7.13035	18.182	20.8025	17.9693	16.6326	20.9348	22.3572	23.045	25.1977	17.6226	22.5344	28.9115	26.3244		0.189523	0.273759	0.643196	0.478857	1.22106	1.39704	1.20677	1.117	1.40593	1.50145	1.54764	1.69221	1.18349	1.51335	1.94162	1.76788		1.44446	1.14413	1.06794	1.27872	0.744496	0.925612	1.09341	0.910517
196	Q9UKA4	AKAP11	A-kinase anchor protein 11 OS=Homo sapiens OX=9606 GN=AKAP11 PE=1 SV=1			6	175.951	121.402	259.162	211.318	448.33	453.296	455.821	470.977	416.122	356.443	562.747	596.17	576.56	404.033	736.574	634.11		0.435263	0.300321	0.641108	0.522753	1.10907	1.12135	1.1276	1.16509	1.02939	0.881759	1.39211	1.47479	1.42628	0.999486	1.82212	1.56864		0.689976	1.01108	0.856583	0.700765	0.81539	1.03325	1.05939	0.860891
197	Q02952	AKAP12	A-kinase anchor protein 12 OS=Homo sapiens OX=9606 GN=AKAP12 PE=1 SV=4			16	784.653	778.674	1270.8	1221.97	2237.41	2797.11	2739.5	2459.97	4162.03	3275.32	4386.82	5301.9	3501.56	3026.88	4037.81	3470		0.293722	0.291484	0.475703	0.457425	0.837538	1.04705	1.02549	0.92085	1.55799	1.22606	1.64213	1.98468	1.31075	1.13306	1.51149	1.29894		0.99238	1.25016	0.786953	0.864438	0.961575	0.897963	1.2086	0.859377
198	Q12802	AKAP13	A-kinase anchor protein 13 OS=Homo sapiens OX=9606 GN=AKAP13 PE=1 SV=2			13	501.873	410.469	472.076	379.936	1800.38	1701.57	1115.66	1110.04	1849.62	1548.69	1391.83	1475.73	2037.48	1479.98	1745.23	1390.09		0.324346	0.265274	0.305089	0.245542	1.16353	1.09968	0.721019	0.717387	1.19536	1.00087	0.8995	0.953722	1.31676	0.956468	1.12789	0.898375		0.817874	0.945117	0.837302	0.726378	0.80482	0.994963	1.06028	0.796508
199	Q02040	AKAP17A	A-kinase anchor protein 17A OS=Homo sapiens OX=9606 GN=AKAP17A PE=1 SV=2			10	333.336	273.975	522.892	465.772	634.156	746.255	744.357	693.435	584.917	472.86	679.533	836.954	870.104	547.179	846.713	921.663		0.550397	0.452381	0.863388	0.769072	1.0471	1.2322	1.22907	1.14498	0.965802	0.780776	1.12203	1.38196	1.4367	0.90349	1.39807	1.52183		0.821918	1.17677	0.808422	0.628866	0.890761	0.931589	1.23166	1.08852
200	Q9Y2D5	AKAP2	A-kinase anchor protein 2 OS=Homo sapiens OX=9606 GN=AKAP2 PE=1 SV=3			1	10.6664	6.32407	10.0938	8.50467	25.0019	22.3713	15.7848	13.6512	35.3654	24.5063	24.9738	31.2078	30.719	22.0324	17.5656	16.9315		0.419307	0.248605	0.396797	0.334327	0.98285	0.879438	0.620516	0.536642	1.39025	0.963367	0.981745	1.22681	1.20759	0.866116	0.690521	0.665594		0.592896	0.894784	0.692946	0.717224	0.842564	0.864832	1.24962	0.963901
201	O75969	AKAP3	A-kinase anchor protein 3 OS=Homo sapiens OX=9606 GN=AKAP3 PE=1 SV=2			1	2.94544	4.77795	7.71668	5.91695	13.4849	17.0719	18.0441	19.1125	26.708	19.8735	29.9914	29.453	23.3278	17.7055	34.8505	29.8089		0.17726	0.287542	0.464398	0.356088	0.811535	1.0274	1.08591	1.15021	1.60731	1.19601	1.80491	1.77251	1.40389	1.06554	2.09734	1.79393		1.62215	1.266	0.744103	0.758987	0.766774	1.05921	0.982048	0.855336
202	O43823	AKAP8	A-kinase anchor protein 8 OS=Homo sapiens OX=9606 GN=AKAP8 PE=1 SV=1			6	352.638	356.594	389.398	414.426	649.953	927.154	603.837	705.76	551.184	671.252	627.236	799.692	804.303	762.439	745.586	860.443		0.598179	0.604889	0.660535	0.702989	1.10251	1.57273	1.02429	1.19718	0.934972	1.13864	1.06398	1.35651	1.36434	1.29332	1.26474	1.45957		1.01122	1.42649	1.21784	0.94795	1.06427	1.16879	1.27495	1.15405
203	Q9ULX6	AKAP8L	A-kinase anchor protein 8-like OS=Homo sapiens OX=9606 GN=AKAP8L PE=1 SV=4			11	511.389	412.988	764.212	672.496	1192.37	1308.48	1179.12	1232.3	1055.23	940.485	1333.82	1362.77	1604.67	1124.32	1721.56	1512.39		0.468771	0.37857	0.700524	0.616451	1.093	1.19943	1.08085	1.1296	0.967289	0.862107	1.22266	1.2492	1.47094	1.03062	1.57809	1.38635		0.807581	1.09738	0.891261	0.700655	0.879986	1.0451	1.0217	0.8785
204	Q99996	AKAP9	A-kinase anchor protein 9 OS=Homo sapiens OX=9606 GN=AKAP9 PE=1 SV=4			26	1091	863.891	1445.43	1275.4	3408.35	3413.97	2887.23	3034.8	3645.71	3149.64	3648.83	4105.55	3762.39	3002.6	4739.06	4102.52		0.366493	0.290202	0.485555	0.428438	1.14495	1.14683	0.96989	1.01946	1.22468	1.05804	1.22573	1.37915	1.26388	1.00865	1.59196	1.37814		0.791834	1.00165	0.86393	0.798057	0.882367	1.05111	1.12517	0.865682
205	Q7Z591	AKNA	AT-hook-containing transcription factor OS=Homo sapiens OX=9606 GN=AKNA PE=1 SV=2			1	7.55649	12.2491	13.2132	8.76993	27.1646	28.279	22.3302	21.5665	26.4423	27.5044	22.4848	31.3241	31.7461	29.997	27.3469	30.1275		0.325327	0.527356	0.568863	0.377569	1.16951	1.21749	0.961374	0.928495	1.13841	1.18414	0.96803	1.34859	1.36675	1.29145	1.17736	1.29707		1.621	1.04102	1.04017	0.944903	0.663725	0.9658	1.39312	1.10168
206	P14550	AKR1A1	Alcohol dehydrogenase [NADP(+)] OS=Homo sapiens OX=9606 GN=AKR1A1 PE=1 SV=3			5	173.229	180.464	307.352	245.986	413.359	478.455	570.649	392.254	828.879	492.689	643.345	1089.46	522.91	486.32	572.513	539.115		0.357472	0.372402	0.634246	0.507612	0.853	0.987331	1.17758	0.809448	1.71046	1.0167	1.3276	2.24819	1.07907	1.00356	1.18143	1.11251		1.04177	1.15748	0.594404	0.930026	0.80034	0.687382	1.69343	0.941664
207	P15121	AKR1B1	Aldose reductase OS=Homo sapiens OX=9606 GN=AKR1B1 PE=1 SV=3			2	73.6385	78.1607	139.968	128.624	125.014	173.349	219.576	146.719	230.139	150.563	243.328	517.762	153.894	163.002	172.855	209.988		0.505511	0.536555	0.960848	0.882974	0.858192	1.19	1.50734	1.00719	1.57985	1.03358	1.67039	3.55432	1.05645	1.11897	1.18661	1.44152		1.06141	1.38664	0.654226	1.05918	0.918953	0.668192	2.12784	1.21482
208	O43488	AKR7A2	Aflatoxin B1 aldehyde reductase member 2 OS=Homo sapiens OX=9606 GN=AKR7A2 PE=1 SV=3			3	96.0001	90.6923	163.021	125.31	201.492	229.846	288.767	206.524	312.923	189.691	331.067	449.771	263.602	200.169	308.348	237.454		0.439351	0.41506	0.746077	0.57349	0.922142	1.05191	1.32156	0.945171	1.43211	0.868134	1.51515	2.05841	1.20639	0.916087	1.41118	1.08672		0.94471	1.14072	0.606191	0.759361	0.768674	0.715193	1.35855	0.770084
209	P31749	AKT1	RAC-alpha serine/threonine-protein kinase OS=Homo sapiens OX=9606 GN=AKT1 PE=1 SV=2			3	98.5575	85.6851	188.414	163.263	379.942	382.707	431.179	446.607	466.133	384.484	501.135	648.415	422.105	314.939	597.512	599.826		0.288446	0.250773	0.551427	0.477818	1.11197	1.12006	1.26192	1.30707	1.36422	1.12526	1.46666	1.8977	1.23537	0.921725	1.74872	1.7555		0.869392	1.00728	0.824838	0.746115	0.866512	1.03578	1.29389	1.00387
210	Q96B36	AKT1S1	Proline-rich AKT1 substrate 1 OS=Homo sapiens OX=9606 GN=AKT1S1 PE=1 SV=1			1	39.8998	33.441	63.6172	56.2037	69.308	101.422	100.077	78.2848	95.6063	71.9053	101.418	132.271	106.483	87.4222	89.7685	100.762		0.512691	0.429699	0.817447	0.722187	0.89057	1.30322	1.28594	1.00592	1.22849	0.923944	1.30317	1.69961	1.36825	1.12333	1.15348	1.29474		0.838125	1.46335	0.752098	0.820997	0.883467	0.782246	1.30422	1.12247
211	P31751	AKT2	RAC-beta serine/threonine-protein kinase OS=Homo sapiens OX=9606 GN=AKT2 PE=1 SV=2			5	107.213	106.662	200.125	179.109	483.322	509.976	469.635	509.639	488.264	448.528	566.002	773.056	538.445	456.081	678.961	720.138		0.265175	0.263812	0.494978	0.442998	1.19542	1.26135	1.16157	1.26051	1.20764	1.10936	1.39992	1.91203	1.33176	1.12804	1.6793	1.78115		0.994861	1.05515	0.918618	0.847034	0.894986	1.08518	1.36582	1.06065
212	Q9Y243	AKT3	RAC-gamma serine/threonine-protein kinase OS=Homo sapiens OX=9606 GN=AKT3 PE=1 SV=1			1	6.15841	4.75988	12.0919	12.7649	20.5761	26.669	21.9407	19.591	34.2639	23.0463	26.8129	41.6659	26.0415	22.1299	31.3521	27.5841		0.283015	0.218745	0.555695	0.586623	0.945594	1.2256	1.00831	0.900323	1.57463	1.05911	1.23221	1.9148	1.19676	1.017	1.44081	1.26765		0.772907	1.29612	0.672612	0.849794	1.05566	0.892907	1.55395	0.879817
213	Q9H8T0	AKTIP	AKT-interacting protein OS=Homo sapiens OX=9606 GN=AKTIP PE=1 SV=1			1	5.16924	5.45894	11.5222	7.42365	17.1377	20.7995	20.328	18.6841	25.27	21.1644	20.5297	38.0506	18.2344	13.8709	23.6986	27.6705		0.314185	0.331793	0.700317	0.451208	1.04163	1.26419	1.23553	1.13562	1.53591	1.28637	1.24779	2.31271	1.10828	0.843071	1.4404	1.68181		1.05604	1.21367	0.837531	0.7607	0.644291	0.919131	1.85344	1.1676
214	P13196	ALAS1	5-aminolevulinate synthase, nonspecific, mitochondrial OS=Homo sapiens OX=9606 GN=ALAS1 PE=1 SV=2			4	114.194	88.3373	152.341	116.183	354.983	365.357	256.196	246.147	336.855	290.716	288.103	316.011	403.604	326.858	399.55	332.901		0.377614	0.292112	0.503758	0.384192	1.17385	1.20816	0.847184	0.813954	1.11391	0.961334	0.952693	1.04498	1.33463	1.08085	1.32122	1.10083		0.773572	1.02922	0.86303	0.809848	0.762651	0.960776	1.09687	0.83319
215	Q8IZ83	ALDH16A1	Aldehyde dehydrogenase family 16 member A1 OS=Homo sapiens OX=9606 GN=ALDH16A1 PE=1 SV=2			7	230.738	224.244	403.408	381.246	1269.24	1196.21	1220.38	1490.84	1252.49	949.54	1630.38	1455.34	1219.82	1040.59	2267.82	1754.21		0.232348	0.225808	0.406222	0.383906	1.27809	1.20456	1.22889	1.50124	1.26123	0.956164	1.64175	1.46549	1.22833	1.04785	2.28364	1.76645		0.971856	0.942462	0.758122	0.853068	0.945063	1.22162	0.892639	0.773523
216	P54886	ALDH18A1	Delta-1-pyrroline-5-carboxylate synthase OS=Homo sapiens OX=9606 GN=ALDH18A1 PE=1 SV=2			8	256.187	137.09	179.367	187.66	1026.38	1027.17	694.717	493.819	1574.42	874.998	1134.01	1150.49	982.228	693.789	936.302	773.376		0.266916	0.142831	0.186879	0.195519	1.06936	1.07019	0.723812	0.5145	1.64036	0.911643	1.1815	1.19867	1.02336	0.722845	0.975514	0.805765		0.535117	1.00077	0.555759	0.706342	1.04623	0.71082	1.01453	0.82599
217	P00352	ALDH1A1	Retinal dehydrogenase 1 OS=Homo sapiens OX=9606 GN=ALDH1A1 PE=1 SV=2			1	6.68154	4.58085	41.3384	38.5078	13.7682	14.2843	63.8249	65.6529	13.8939	7.10701	80.9903	111.833	16.139	11.8106	58.0563	57.8481		0.529413	0.362964	3.27545	3.05117	1.09093	1.13182	5.05718	5.20202	1.10089	0.563125	6.41728	8.86111	1.27878	0.935815	4.6001	4.5836		0.685598	1.03748	0.51152	0.731805	0.931526	1.02864	1.38082	0.996414
218	O94788	ALDH1A2	Retinal dehydrogenase 2 OS=Homo sapiens OX=9606 GN=ALDH1A2 PE=1 SV=3			6	569.791	490.783	690.241	654.359	1332.65	1518.61	1378.43	1163.83	1810.51	1439.62	1696.69	2172.08	1454.67	1069.42	1471.27	1346.84		0.441047	0.379891	0.534281	0.506507	1.03154	1.17548	1.06697	0.900863	1.40143	1.11434	1.31332	1.6813	1.12599	0.827785	1.13884	1.04252		0.861339	1.13954	0.795146	0.735163	0.948015	0.844316	1.28019	0.915427
219	P47895	ALDH1A3	Aldehyde dehydrogenase family 1 member A3 OS=Homo sapiens OX=9606 GN=ALDH1A3 PE=1 SV=2			1	9.33841	9.9163	13.0636	10.6025	43.0149	36.1759	27.2529	29.0939	64.033	58.892	31.7603	44.8857	36.2023	35.1279	33.3089	37.5181		0.2448	0.259949	0.342453	0.277937	1.1276	0.948325	0.714415	0.762676	1.67858	1.54381	0.832573	1.17665	0.949017	0.920852	0.873169	0.98351		1.06188	0.841009	0.919713	0.970322	0.811606	1.06755	1.41326	1.12637
220	P30837	ALDH1B1	Aldehyde dehydrogenase X, mitochondrial OS=Homo sapiens OX=9606 GN=ALDH1B1 PE=1 SV=3			2	146.164	109.912	207.713	194.754	321.608	415.335	396.723	332.173	555.492	384.839	508.482	670.764	373.877	318.803	396.159	352.482		0.418466	0.314677	0.59468	0.557579	0.92076	1.1891	1.13581	0.951008	1.59037	1.10179	1.45578	1.92039	1.07041	0.91273	1.1342	1.00915		0.751977	1.29143	0.692789	0.852695	0.937611	0.837292	1.31915	0.889749
221	P05091	ALDH2	Aldehyde dehydrogenase, mitochondrial OS=Homo sapiens OX=9606 GN=ALDH2 PE=1 SV=2			7	616.202	515.312	1202.78	1178.96	1262.14	1652.78	2167.13	1805.28	2139.1	1526.61	2385.34	3558.47	1457.72	1162.08	1801.13	2001.39		0.45018	0.376473	0.878717	0.861315	0.922084	1.20747	1.58324	1.31889	1.56277	1.1153	1.74266	2.59972	1.06497	0.848983	1.31586	1.46216		0.836271	1.30951	0.713669	0.79719	0.980196	0.833028	1.49181	1.11119
222	P51648	ALDH3A2	Fatty aldehyde dehydrogenase OS=Homo sapiens OX=9606 GN=ALDH3A2 PE=1 SV=1			6	257.872	227.652	312.115	281.393	860.35	947.626	748.403	681.528	1151.46	915.296	834.895	1008.77	972.119	761.806	979.904	851.672		0.318184	0.280896	0.385113	0.347206	1.06157	1.16926	0.923441	0.840925	1.42077	1.12937	1.03016	1.2447	1.19948	0.939979	1.20909	1.05086		0.88281	1.10144	0.7949	0.783655	0.901568	0.910643	1.20826	0.869138
223	P30038	ALDH4A1	Delta-1-pyrroline-5-carboxylate dehydrogenase, mitochondrial OS=Homo sapiens OX=9606 GN=ALDH4A1 PE=1 SV=3			1	23.5378	26.8472	35.6743	24.4505	58.7446	71.7443	58.6084	47.9125	83.4923	62.9901	66.2744	98.4505	56.1444	48.1424	54.7254	44.2407		0.424259	0.48391	0.643015	0.44071	1.05885	1.29316	1.05639	0.863603	1.50491	1.13537	1.19457	1.77453	1.01198	0.867747	0.986403	0.79742		1.1406	1.22129	0.754442	0.857475	0.685381	0.817502	1.4855	0.808413
224	P51649	ALDH5A1	Succinate-semialdehyde dehydrogenase, mitochondrial OS=Homo sapiens OX=9606 GN=ALDH5A1 PE=1 SV=2			3	53.1239	42.4745	76.8129	88.2835	138.821	179.796	162.864	162.973	203.714	161.497	211.14	305.258	148.61	123.348	198.279	209.987		0.390424	0.312158	0.564522	0.648823	1.02024	1.32138	1.19694	1.19774	1.49716	1.18689	1.55173	2.24344	1.09218	0.906522	1.45721	1.54326		0.799537	1.29516	0.792763	0.830011	1.14933	1.00067	1.44576	1.05905
225	Q02252	ALDH6A1	Methylmalonate-semialdehyde dehydrogenase [acylating], mitochondrial OS=Homo sapiens OX=9606 GN=ALDH6A1 PE=1 SV=2			4	143.952	89.4132	188.644	168.877	565.989	535.398	552.766	512.557	775.874	442.261	670.705	737.04	678.056	425.318	654.739	609.061		0.266101	0.165284	0.348716	0.312176	1.04625	0.989704	1.02181	0.947482	1.43423	0.817537	1.23982	1.36245	1.25341	0.786217	1.21031	1.12587		0.621132	0.945951	0.570017	0.627261	0.895215	0.927259	1.0989	0.930235
226	P49419	ALDH7A1	Alpha-aminoadipic semialdehyde dehydrogenase OS=Homo sapiens OX=9606 GN=ALDH7A1 PE=1 SV=5			5	911.301	888.906	1419.25	1485.15	1596.62	2488.56	2604.02	2262.34	2841.62	2335.1	2868.12	4748.31	1699.08	1678.14	2088.48	2359.01		0.517151	0.504443	0.805406	0.842803	0.906061	1.41223	1.47775	1.28385	1.61258	1.32514	1.62762	2.6946	0.964206	0.952322	1.18519	1.33871		0.975425	1.55864	0.82175	0.987676	1.04643	0.868787	1.65555	1.12953
227	P49189	ALDH9A1	4-trimethylaminobutyraldehyde dehydrogenase OS=Homo sapiens OX=9606 GN=ALDH9A1 PE=1 SV=3			4	191.976	151.28	246.8	224.675	558.793	530.514	558.672	471.655	628.312	439.084	554.183	706.844	598.025	420.715	582.079	583.106		0.388398	0.306064	0.499316	0.454553	1.13053	1.07331	1.13028	0.954233	1.27118	0.888337	1.1212	1.43006	1.2099	0.851173	1.17764	1.17972		0.788015	0.949393	0.698831	0.703507	0.910353	0.844243	1.27547	1.00176
228	P04075	ALDOA	Fructose-bisphosphate aldolase A OS=Homo sapiens OX=9606 GN=ALDOA PE=1 SV=2			7	322.427	321.548	431.433	429.061	523.742	780.128	651.986	586.982	776.651	618.351	706.667	1140.42	534.281	545.132	488.974	613.948		0.597889	0.59626	0.800024	0.795625	0.971196	1.44662	1.209	1.08846	1.44018	1.14663	1.3104	2.11473	0.990739	1.01086	0.906724	1.13847		0.997274	1.48953	0.796176	1.02031	0.994502	0.900298	1.6138	1.25558
229	P09972	ALDOC	Fructose-bisphosphate aldolase C OS=Homo sapiens OX=9606 GN=ALDOC PE=1 SV=2			3	85.53	84.2258	105.787	113.406	144.839	210.525	175.067	146.76	238.04	182.811	201.025	346.398	157.763	152.008	123.218	174.144		0.546367	0.538036	0.67577	0.72444	0.925235	1.34484	1.11833	0.937506	1.5206	1.1678	1.28415	2.2128	1.00779	0.97103	0.787119	1.11244		0.984752	1.45351	0.767984	0.963521	1.07202	0.838308	1.72316	1.4133
230	Q2TAA5	ALG11	GDP-Man:Man(3)GlcNAc(2)-PP-Dol alpha-1,2-mannosyltransferase OS=Homo sapiens OX=9606 GN=ALG11 PE=1 SV=2			4	379.895	283.502	692.492	560.765	1485.01	1376.01	1470.8	1368.5	1555.89	1355.2	1683.83	2081.92	1675.14	1233.91	2196.18	2103.61		0.298195	0.222532	0.543564	0.440167	1.16564	1.08008	1.15449	1.07419	1.22128	1.06375	1.3217	1.63418	1.31488	0.968545	1.72387	1.65121		0.746264	0.9266	0.871013	0.736601	0.809778	0.930446	1.23642	0.95785
231	Q9NP73	ALG13	Putative bifunctional UDP-N-acetylglucosamine transferase and deubiquitinase ALG13 OS=Homo sapiens OX=9606 GN=ALG13 PE=1 SV=2			2	131.223	90.5293	160.74	138.323	342.677	400.793	324.458	295.716	412.041	332.476	396.855	471.301	424.404	294.801	443.675	436.651		0.400575	0.276353	0.49068	0.422249	1.04607	1.22347	0.990451	0.902712	1.25781	1.01493	1.21145	1.43871	1.29555	0.899919	1.35438	1.33293		0.689889	1.16959	0.8069	0.694624	0.860539	0.911415	1.18759	0.984169
232	Q96F25	ALG14	UDP-N-acetylglucosamine transferase subunit ALG14 homolog OS=Homo sapiens OX=9606 GN=ALG14 PE=1 SV=1			1	7.99527	5.49479	10.236	5.1616	27.2804	32.126	18.3797	20.8078	43.9412	35.2811	28.5832	37.1313	33.5437	25.8013	34.3214	31.6037		0.283619	0.194919	0.363106	0.183099	0.967728	1.13962	0.65199	0.738123	1.55874	1.25154	1.01394	1.31717	1.18991	0.91526	1.2175	1.12109		0.687255	1.17762	0.802916	0.769185	0.504259	1.13211	1.29906	0.920816
233	Q9H553	ALG2	Alpha-1,3/1,6-mannosyltransferase ALG2 OS=Homo sapiens OX=9606 GN=ALG2 PE=1 SV=1			2	23.8218	21.806	23.934	24.4445	70.4484	80.4918	66.4229	58.9938	83.2299	81.3736	91.195	112.769	81.4248	81.87	130.702	106.714		0.368011	0.33687	0.369744	0.377631	1.08832	1.24348	1.02613	0.911365	1.28578	1.2571	1.40883	1.74211	1.25789	1.26477	2.01915	1.64857		0.91538	1.14256	0.977697	1.00547	1.02133	0.888155	1.23657	0.816468
234	Q9Y673	ALG5	Dolichyl-phosphate beta-glucosyltransferase OS=Homo sapiens OX=9606 GN=ALG5 PE=1 SV=1			4	87.0951	70.9613	107.361	109.42	278.66	366.628	281.606	315.024	455.879	351.209	371.625	573.096	381.916	303.427	428.578	421.788		0.289461	0.23584	0.356814	0.363657	0.926127	1.21849	0.935918	1.04698	1.51511	1.16724	1.2351	1.90469	1.2693	1.00844	1.42438	1.40181		0.814757	1.31568	0.7704	0.794486	1.01918	1.11867	1.54214	0.984157
235	Q9Y672	ALG6	Dolichyl pyrophosphate Man9GlcNAc2 alpha-1,3-glucosyltransferase OS=Homo sapiens OX=9606 GN=ALG6 PE=1 SV=2			3	151.025	128.397	242.306	268.166	345.687	554.185	560.565	393.874	564.143	545.574	477.425	1124.48	889.494	616.834	510.95	914.464		0.309739	0.263331	0.496949	0.549986	0.708975	1.13659	1.14967	0.807802	1.15701	1.11893	0.979158	2.30621	1.82428	1.26507	1.04792	1.87549		0.850171	1.60314	0.967085	0.693466	1.10672	0.702638	2.3553	1.78973
236	Q9H6U8	ALG9	Alpha-1,2-mannosyltransferase ALG9 OS=Homo sapiens OX=9606 GN=ALG9 PE=1 SV=2			3	23.4913	21.4795	56.9046	61.29	61.1692	103.761	204.187	88.9704	433.365	127.506	280.484	665.252	640.877	271.705	260.805	311.537		0.0810812	0.0741374	0.196409	0.211545	0.211128	0.358135	0.70476	0.307085	1.49578	0.440092	0.968102	2.29614	2.21201	0.937801	0.900179	1.07528		0.91436	1.69629	0.294223	0.423958	1.07707	0.43573	2.3718	1.19452
237	Q13686	ALKBH1	Nucleic acid dioxygenase ALKBH1 OS=Homo sapiens OX=9606 GN=ALKBH1 PE=1 SV=2			1	17.1812	9.81175	21.9221	13.3367	53.8808	59.7589	62.3667	44.3032	80.4729	67.5917	66.2285	82.5671	59.9541	48.7496	71.6789	52.6343		0.324957	0.185575	0.414624	0.252244	1.01908	1.13025	1.17957	0.837929	1.52203	1.2784	1.25261	1.56163	1.13394	0.922026	1.3557	0.9955		0.571075	1.10909	0.839931	0.813115	0.608368	0.710366	1.2467	0.734307
238	Q6NS38	ALKBH2	DNA oxidative demethylase ALKBH2 OS=Homo sapiens OX=9606 GN=ALKBH2 PE=1 SV=1			2	19.3256	18.7533	19.7434	9.85329	62.9673	231.791	48.1047	70.7747	277.705	347.891	81.3627	245.804	113.783	147.789	74.5881	195.973		0.163161	0.158329	0.166688	0.0831886	0.531615	1.95695	0.406135	0.597531	2.34459	2.93715	0.686923	2.07525	0.960638	1.24774	0.629727	1.65455		0.970386	3.68113	1.25274	1.29887	0.499068	1.47126	3.02109	2.6274
239	Q6P6C2	ALKBH5	RNA demethylase ALKBH5 OS=Homo sapiens OX=9606 GN=ALKBH5 PE=1 SV=2			1	20.549	14.891	25.6969	19.6478	35.5149	68.6795	44.1792	49.4668	51.6669	83.0869	54.0922	74.8301	41.4076	53.7616	51.2163	52.1143		0.551139	0.399387	0.689209	0.526968	0.952535	1.84203	1.18492	1.32674	1.38574	2.22845	1.45079	2.007	1.11058	1.44193	1.37366	1.39774		0.724658	1.93382	1.60813	1.29835	0.764598	1.11969	1.38338	1.01753
240	Q96BT7	ALKBH8	Alkylated DNA repair protein alkB homolog 8 OS=Homo sapiens OX=9606 GN=ALKBH8 PE=1 SV=2			2	55.3712	52.8881	86.1497	65.4304	173.198	183.756	151.735	144.644	171.577	154.585	140.313	188.24	198.267	149.912	199.393	183.542		0.37012	0.353522	0.575854	0.437359	1.15772	1.22829	1.01425	0.96685	1.14688	1.0333	0.9379	1.25826	1.32528	1.00206	1.33281	1.22686		0.955155	1.06096	0.900966	0.756112	0.759497	0.953267	1.34157	0.920504
241	Q8TCU4	ALMS1	Alstrom syndrome protein 1 OS=Homo sapiens OX=9606 GN=ALMS1 PE=1 SV=4			18	812.077	714.365	1057.76	904.082	2465	2642.41	1898.73	1967.81	2783.45	2737.56	2548.58	2772.47	2626.4	2073.73	3115.06	2644.24		0.373931	0.328938	0.487058	0.416295	1.13504	1.21673	0.874293	0.906102	1.28167	1.26054	1.17352	1.27662	1.20936	0.954874	1.43437	1.21757		0.879676	1.07197	0.983513	0.789571	0.854714	1.03638	1.08785	0.848857
242	Q96QP1	ALPK1	Alpha-protein kinase 1 OS=Homo sapiens OX=9606 GN=ALPK1 PE=1 SV=3			2	14.6619	11.9014	22.6359	17.2037	54.9851	45.8576	46.5506	37.8953	53.4988	47.1765	54.1486	60.5243	53.5401	41.7312	59.2551	54.1906		0.331931	0.269436	0.512455	0.389475	1.24481	1.03817	1.05386	0.857913	1.21116	1.06803	1.22587	1.37021	1.2121	0.944755	1.34148	1.22682		0.811723	0.834	0.881824	0.779438	0.760018	0.814067	1.11774	0.914531
243	P05186	ALPL	Alkaline phosphatase, tissue-nonspecific isozyme OS=Homo sapiens OX=9606 GN=ALPL PE=1 SV=4			2	30.2555	34.1288	35.8561	41.5669	110.281	185.632	93.6334	104.321	311.72	248.965	134.489	226.434	159.39	174.765	121.678	145.193		0.197863	0.223193	0.234489	0.271836	0.721207	1.21398	0.612337	0.682231	2.03856	1.62816	0.879521	1.48082	1.04237	1.14292	0.795741	0.949522		1.12802	1.68326	0.798682	1.09646	1.15927	1.11414	1.68366	1.19326
244	P05187	ALPP	Alkaline phosphatase, placental type OS=Homo sapiens OX=9606 GN=ALPP PE=1 SV=2			1	27.1843	22.2157	23.9412	26.5589	99.2655	98.0904	88.1293	75.4924	226.174	166.014	95.3322	131.336	168.185	137.84	114.01	116.643		0.208785	0.170625	0.183877	0.203982	0.762395	0.75337	0.676865	0.579809	1.7371	1.27505	0.732186	1.00871	1.29172	1.05866	0.875638	0.89586		0.817225	0.988162	0.73401	0.819574	1.10934	0.85661	1.37767	1.02309
245	Q96Q42	ALS2	Alsin OS=Homo sapiens OX=9606 GN=ALS2 PE=1 SV=2			1	20.6117	17.6239	29.0729	25.5204	53.6267	68.4166	49.9735	43.6351	73.6969	58.8148	61.1451	74.4949	52.7875	59.3154	70.5083	69.9338		0.41075	0.351209	0.579364	0.50857	1.06867	1.3634	0.995871	0.869559	1.46863	1.17206	1.2185	1.48453	1.05195	1.18204	1.40509	1.39364		0.855043	1.27579	0.798063	1.12366	0.877807	0.873165	1.21833	0.991852
246	Q86V81	ALYREF	THO complex subunit 4 OS=Homo sapiens OX=9606 GN=ALYREF PE=1 SV=3			16	564.629	525.359	697.545	667.278	995.64	1292.61	1008.09	994.887	1025.99	1064.27	1016.48	1230.48	1249.47	985.182	1164.15	1238.14		0.58881	0.547858	0.727418	0.695855	1.03828	1.34797	1.05126	1.03749	1.06993	1.10985	1.06001	1.28318	1.30298	1.02737	1.21401	1.29117		0.93045	1.29827	1.03731	0.78848	0.956609	0.986903	1.21053	1.06356
247	Q9C0C7	AMBRA1	Activating molecule in BECN1-regulated autophagy protein 1 OS=Homo sapiens OX=9606 GN=AMBRA1 PE=1 SV=2			4	120.54	94.6259	133.447	117.756	399.21	384.262	300.767	270.049	354.874	292.277	361.68	339.79	473.658	338.151	476.639	370.12		0.357611	0.28073	0.395902	0.349351	1.18435	1.14	0.892297	0.801165	1.05282	0.867109	1.07301	1.00807	1.40522	1.00321	1.41406	1.09805		0.785017	0.962556	0.823608	0.713914	0.882418	0.897868	0.939477	0.776521
248	Q9Y303	AMDHD2	N-acetylglucosamine-6-phosphate deacetylase OS=Homo sapiens OX=9606 GN=AMDHD2 PE=1 SV=2			1	17.188	13.2648	30.3403	25.4909	49.5085	49.6636	55.3836	38.0088	44.1249	36.5807	49.8109	60.9755	56.4202	38.1802	52.0364	56.3729		0.411094	0.317261	0.725664	0.609678	1.18412	1.18783	1.32464	0.909075	1.05536	0.874919	1.19135	1.45838	1.34943	0.913175	1.24458	1.3483		0.771748	1.00313	0.829026	0.676712	0.840166	0.686283	1.22414	1.08334
249	Q9UKV5	AMFR	E3 ubiquitin-protein ligase AMFR OS=Homo sapiens OX=9606 GN=AMFR PE=1 SV=2			4	196.197	147.776	290.002	279.66	649.314	716.569	600.005	575.242	767.947	589.343	752.965	939.084	784.349	625.866	918.396	798.413		0.327294	0.246519	0.483779	0.466526	1.08318	1.19537	1.00092	0.959614	1.28108	0.983137	1.25609	1.56657	1.30844	1.04406	1.53206	1.33191		0.753202	1.10358	0.767427	0.797943	0.964338	0.958729	1.24718	0.869356
250	Q86SJ2	AMIGO2	Amphoterin-induced protein 2 OS=Homo sapiens OX=9606 GN=AMIGO2 PE=1 SV=1			1	9.88837	6.65429	19.3034	40.4691	23.0898	34.8671	58.1791	33.1425	121.191	60.2441	112.502	164.562	117.713	90.5666	95.3378	95.5973		0.14548	0.0978996	0.283997	0.595392	0.339703	0.512974	0.855946	0.487601	1.78299	0.886327	1.65516	2.42108	1.73182	1.33244	1.40263	1.40645		0.672941	1.51007	0.4971	0.769385	2.09648	0.569663	1.46275	1.00272
251	Q9Y4X0	AMMECR1	AMME syndrome candidate gene 1 protein OS=Homo sapiens OX=9606 GN=AMMECR1 PE=1 SV=1			2	170.703	151.758	292.016	246.447	436.585	493.435	457.777	411.757	461.858	378.257	487.682	704.771	498.666	379.61	558.335	568.868		0.435519	0.387184	0.745028	0.628767	1.11387	1.25891	1.16794	1.05053	1.17835	0.965057	1.24424	1.7981	1.27226	0.968509	1.42449	1.45137		0.889018	1.13022	0.81899	0.761251	0.84395	0.899471	1.44514	1.01887
252	Q8IY45	AMN1	Protein AMN1 homolog OS=Homo sapiens OX=9606 GN=AMN1 PE=2 SV=4			1	11.8006	11.7092	19.2316	13.1155	41.2057	35.0243	34.839	31.4014	42.5537	50.1032	40.2213	48.5483	33.1876	33.794	48.0673	45.4844		0.366627	0.363788	0.597498	0.407479	1.2802	1.08815	1.0824	0.975596	1.32208	1.55663	1.24962	1.50832	1.03109	1.04993	1.49338	1.41313		0.992255	0.849987	1.17741	1.01827	0.681977	0.901329	1.20703	0.946265
253	Q01433	AMPD2	AMP deaminase 2 OS=Homo sapiens OX=9606 GN=AMPD2 PE=1 SV=2			3	201.168	185.079	313.128	292.103	560.508	653.077	623.328	554.195	786.115	681.255	600.551	879.704	583.613	491.97	679.349	654.292		0.377531	0.347337	0.587646	0.548189	1.0519	1.22563	1.1698	1.04006	1.4753	1.27851	1.12705	1.65094	1.09526	0.923279	1.27493	1.22791		0.920022	1.16515	0.86661	0.842973	0.932855	0.88909	1.46483	0.963116
254	P49418	AMPH	Amphiphysin OS=Homo sapiens OX=9606 GN=AMPH PE=1 SV=1			1	19.4266	18.152	34.7529	29.3362	59.6126	65.2785	79.0802	70.7186	71.8516	53.0013	123.853	107.218	72.6894	59.9561	116.728	92.1543		0.347555	0.324751	0.621753	0.524844	1.06651	1.16788	1.4148	1.2652	1.28547	0.948229	2.21581	1.9182	1.30046	1.07265	2.08834	1.6487		0.934389	1.09505	0.73765	0.824826	0.844137	0.894264	0.865688	0.789479
255	Q86W34	AMZ2	Archaemetzincin-2 OS=Homo sapiens OX=9606 GN=AMZ2 PE=1 SV=2			1	30.2355	19.0692	57.6629	36.983	70.2509	76.1389	102.758	68.968	71.7346	67.7325	100.088	129.999	88.5711	50.811	89.1026	89.07		0.463749	0.292481	0.884427	0.567241	1.0775	1.16781	1.57609	1.05782	1.10026	1.03887	1.53514	1.99391	1.35849	0.779333	1.36665	1.36615		0.630689	1.08381	0.94421	0.573675	0.641366	0.671169	1.29885	0.999634
256	Q9H1A4	ANAPC1	Anaphase-promoting complex subunit 1 OS=Homo sapiens OX=9606 GN=ANAPC1 PE=1 SV=1			14	705.468	544.762	960.425	764.092	2278.73	2298.34	1910.52	1922.88	2207.29	2044.92	2187.97	2367.56	2211.44	1742.88	2723.32	2485.54		0.381183	0.294349	0.518943	0.412859	1.23126	1.24185	1.03231	1.03898	1.19266	1.10492	1.18222	1.27926	1.1949	0.941725	1.47148	1.343		0.772199	1.00861	0.926439	0.78812	0.795577	1.00647	1.08208	0.912687
257	Q9UM13	ANAPC10	Anaphase-promoting complex subunit 10 OS=Homo sapiens OX=9606 GN=ANAPC10 PE=1 SV=1			1	40.7029	27.3692	49.7778	36.2997	118.347	119.087	112.274	96.43	113.852	104.183	90.148	125.378	107.247	91.0135	125.581	152.475		0.428284	0.287984	0.523772	0.381952	1.24527	1.25306	1.18137	1.01466	1.19797	1.09623	0.948555	1.31925	1.12847	0.957662	1.32139	1.60437		0.672414	1.00625	0.915074	0.848634	0.729235	0.858881	1.3908	1.21416
258	Q96DE5	ANAPC16	Anaphase-promoting complex subunit 16 OS=Homo sapiens OX=9606 GN=ANAPC16 PE=1 SV=1			1	10.6385	9.25869	12.6836	12.8452	19.4337	25.6071	20.1161	31.3443	28.9058	23.6316	25.1418	33.8025	33.8514	25.7063	36.3176	33.8179		0.458411	0.398955	0.546534	0.553497	0.837394	1.1034	0.866799	1.35062	1.24555	1.01828	1.08336	1.45654	1.45865	1.10768	1.56492	1.45721		0.8703	1.31766	0.817538	0.759387	1.01274	1.55817	1.34447	0.931171
259	Q9UJX6	ANAPC2	Anaphase-promoting complex subunit 2 OS=Homo sapiens OX=9606 GN=ANAPC2 PE=1 SV=1			4	166.595	110.563	192.035	159.105	522.2	529.931	442.695	431.803	622.898	528.922	496.143	582.596	534.717	433.401	611.092	530.213		0.360906	0.23952	0.416018	0.34468	1.13128	1.14802	0.959039	0.935443	1.34943	1.14584	1.07483	1.26212	1.15839	0.938905	1.32385	1.14864		0.663663	1.0148	0.849131	0.810524	0.828521	0.975396	1.17425	0.867648
260	Q9UJX5	ANAPC4	Anaphase-promoting complex subunit 4 OS=Homo sapiens OX=9606 GN=ANAPC4 PE=1 SV=2			8	171.723	121.182	233.736	201.567	573.128	562.391	484.097	463.78	589.661	524.134	522.364	557.704	509.086	396.614	585.669	621.995		0.372582	0.262925	0.50713	0.437334	1.2435	1.2202	1.05033	1.00625	1.27937	1.1372	1.13336	1.21003	1.10455	0.860522	1.27071	1.34952		0.705683	0.981266	0.888873	0.779071	0.86237	0.958031	1.06765	1.06202
261	Q9UJX4	ANAPC5	Anaphase-promoting complex subunit 5 OS=Homo sapiens OX=9606 GN=ANAPC5 PE=1 SV=2			10	687.881	518.883	888.591	726.76	2379.43	2405.88	1926.9	1863.11	2644.64	2296.57	2064.06	2745.12	2164.81	1995.74	3048.43	2587.86		0.349322	0.263501	0.451247	0.369065	1.20833	1.22176	0.978524	0.94613	1.34301	1.16625	1.04818	1.39403	1.09934	1.01348	1.54806	1.31417		0.754321	1.01112	0.868387	0.921901	0.817879	0.966895	1.32996	0.848916
262	Q9UJX3	ANAPC7	Anaphase-promoting complex subunit 7 OS=Homo sapiens OX=9606 GN=ANAPC7 PE=1 SV=4			6	270.138	225.092	393.576	331.472	981.044	981.719	800.982	796.017	1095.39	942.758	932.795	1069.06	1077.25	799.218	1082.36	986.693		0.315598	0.262972	0.459809	0.387254	1.14614	1.14693	0.935775	0.929975	1.27973	1.10141	1.08977	1.24897	1.25854	0.933714	1.2645	1.15274		0.833248	1.00069	0.86066	0.741906	0.842206	0.993801	1.14608	0.911613
263	Q9UNK9	ANGEL1	Protein angel homolog 1 OS=Homo sapiens OX=9606 GN=ANGEL1 PE=1 SV=1			2	29.2062	27.0837	68.057	49.7608	95.9701	99.2451	119.032	72.7564	121.823	96.8153	129.351	120.388	133.579	87.5819	136.972	115.389		0.306967	0.284658	0.715301	0.523002	1.00868	1.0431	1.25106	0.764693	1.2804	1.01756	1.35952	1.26532	1.40396	0.920514	1.43962	1.21278		0.927327	1.03413	0.794721	0.655656	0.731164	0.611234	0.930708	0.842428
264	Q5VTE6	ANGEL2	Protein angel homolog 2 OS=Homo sapiens OX=9606 GN=ANGEL2 PE=2 SV=1			1	247.029	198.189	337.581	341.061	619.796	796.892	692.829	716.864	757.436	691.749	656.426	888.433	887.111	634.801	910.812	1019.13		0.393457	0.315666	0.537684	0.543227	0.987183	1.26925	1.10351	1.14179	1.20641	1.10179	1.04553	1.41506	1.41295	1.01108	1.4507	1.62322		0.80229	1.28573	0.913277	0.715582	1.01031	1.03469	1.35344	1.11892
265	Q01484	ANK2	Ankyrin-2 OS=Homo sapiens OX=9606 GN=ANK2 PE=1 SV=4			4	383.209	335.118	380.039	392.186	1074.1	1581.61	829.283	902.585	1544.26	1602.36	935.07	1478.41	1248.47	1110.57	981.926	1243.85		0.360664	0.315402	0.35768	0.369113	1.01091	1.48856	0.780494	0.849484	1.45341	1.50809	0.880058	1.39143	1.17502	1.04523	0.924157	1.17067		0.874505	1.4725	1.03762	0.889545	1.03196	1.08839	1.58107	1.26675
266	Q12955	ANK3	Ankyrin-3 OS=Homo sapiens OX=9606 GN=ANK3 PE=1 SV=3			5	219.287	186.106	265.825	252.551	738.981	902.709	609.625	579.796	984.305	864.588	788.347	975.097	886.162	715.055	859.284	796.283		0.310085	0.263165	0.375892	0.357122	1.04496	1.27648	0.862046	0.819866	1.39187	1.22258	1.11477	1.37885	1.25309	1.01113	1.21508	1.12599		0.848687	1.22156	0.878374	0.806912	0.950065	0.95107	1.23689	0.926682
267	Q9P2R3	ANKFY1	Rabankyrin-5 OS=Homo sapiens OX=9606 GN=ANKFY1 PE=1 SV=2			11	261.858	212.752	344.296	297.101	864.127	904.838	810.586	821.086	876.167	797.361	925.218	1147.3	922.537	710.537	1080.54	1033.07		0.358134	0.290974	0.470882	0.406335	1.18184	1.23752	1.10861	1.12297	1.1983	1.09052	1.26539	1.56912	1.26172	0.971778	1.47782	1.4129		0.812471	1.04711	0.910056	0.770199	0.862923	1.01295	1.24003	0.956068
268	Q9HCJ1	ANKH	Progressive ankylosis protein homolog OS=Homo sapiens OX=9606 GN=ANKH PE=1 SV=2			2	15.8105	10.3193	46.2699	76.9779	38.3541	76.5855	188.511	75.7223	597.974	160.805	227.002	757.738	514.618	190.792	236.583	304.106		0.0542033	0.0353777	0.158627	0.263904	0.13149	0.262559	0.646274	0.259599	2.05004	0.551289	0.778233	2.59776	1.76427	0.654094	0.811079	1.04257		0.652687	1.9968	0.268916	0.370745	1.66367	0.401686	3.33802	1.28541
269	Q8IWZ3	ANKHD1	Ankyrin repeat and KH domain-containing protein 1 OS=Homo sapiens OX=9606 GN=ANKHD1 PE=1 SV=1			16	598.9	507.747	753.693	671.993	1663.51	1963.33	1573.53	1527.63	2310.62	1916.62	2140.88	2220.3	2206.56	1709.1	2601.74	1989.85		0.353355	0.299574	0.444684	0.39648	0.981481	1.15838	0.928392	0.901311	1.36328	1.13082	1.26313	1.30999	1.30188	1.00838	1.53504	1.17402		0.847799	1.18023	0.829483	0.774554	0.8916	0.97083	1.0371	0.764815
270	Q9P2G1	ANKIB1	Ankyrin repeat and IBR domain-containing protein 1 OS=Homo sapiens OX=9606 GN=ANKIB1 PE=1 SV=3			4	82.3996	86.0777	129.127	118.104	269.251	279.286	248.729	251.413	204.807	193.853	267.524	314.821	299.137	240.619	320.814	302.173		0.385227	0.402423	0.603683	0.552149	1.25878	1.30569	1.16284	1.17538	0.957496	0.906284	1.2507	1.47182	1.3985	1.12492	1.49984	1.41269		1.04464	1.03727	0.946515	0.804377	0.914634	1.01079	1.1768	0.941895
271	Q86XL3	ANKLE2	Ankyrin repeat and LEM domain-containing protein 2 OS=Homo sapiens OX=9606 GN=ANKLE2 PE=1 SV=4			8	261.599	249.992	402.423	360.357	1038.09	1122.19	912.23	933.895	1164.51	997.906	1190.66	1373.13	1335.83	1158.12	1632.96	1280.44		0.275365	0.263147	0.4236	0.37932	1.09272	1.18124	0.960235	0.98304	1.22579	1.05042	1.25332	1.44539	1.40613	1.21906	1.71889	1.34782		0.955631	1.08101	0.856932	0.866967	0.895468	1.02375	1.15325	0.784122
272	Q8IV38	ANKMY2	Ankyrin repeat and MYND domain-containing protein 2 OS=Homo sapiens OX=9606 GN=ANKMY2 PE=1 SV=1			3	138.499	114.191	176.26	141.987	482.571	477.712	359.292	334.777	626.619	504.564	482.915	554.744	509.597	438.658	533.77	490.684		0.315257	0.259926	0.40121	0.323196	1.09845	1.08739	0.817834	0.762032	1.42633	1.14851	1.09923	1.26273	1.15996	0.99849	1.21499	1.11691		0.82449	0.989931	0.805217	0.860794	0.805554	0.931769	1.14874	0.91928
273	Q9NXR5	ANKRD10	Ankyrin repeat domain-containing protein 10 OS=Homo sapiens OX=9606 GN=ANKRD10 PE=1 SV=2			1	14.0583	13.8897	21.7446	21.8825	60.0583	50.2689	47.176	62.8915	59.6439	55.1269	68.9636	75.8564	56.9603	62.2002	80.6918	66.8879		0.294846	0.29131	0.456051	0.458943	1.25961	1.05429	0.989425	1.31903	1.25092	1.15618	1.44638	1.59094	1.19463	1.30453	1.69235	1.40284		0.988007	0.837002	0.924267	1.09199	1.00634	1.33312	1.09995	0.828931
274	Q6UB99	ANKRD11	Ankyrin repeat domain-containing protein 11 OS=Homo sapiens OX=9606 GN=ANKRD11 PE=1 SV=3			4	398.917	310.634	822.389	703.027	610.498	669.488	948.315	675.268	582.595	565.108	890.597	1083.33	1257.58	791.995	1282.13	1263.31		0.559964	0.43604	1.1544	0.986847	0.856963	0.939767	1.33116	0.947881	0.817795	0.793248	1.25014	1.52068	1.76528	1.11173	1.79974	1.77332		0.778693	1.09663	0.969984	0.629777	0.854859	0.712071	1.21641	0.985321
275	Q6UB98	ANKRD12	Ankyrin repeat domain-containing protein 12 OS=Homo sapiens OX=9606 GN=ANKRD12 PE=1 SV=3			1	16.332	12.2726	25.2817	17.6043	26.6087	31.9581	34.8077	26.5894	28.791	18.6172	30.8051	43.2385	43.1603	25.786	40.5249	36.2131		0.568604	0.427274	0.88019	0.612899	0.92639	1.11263	1.21184	0.925718	1.00237	0.648163	1.07249	1.50536	1.50264	0.897747	1.41089	1.26077		0.751445	1.20104	0.646633	0.597447	0.696326	0.763894	1.40361	0.893601
276	Q8IZ07	ANKRD13A	Ankyrin repeat domain-containing protein 13A OS=Homo sapiens OX=9606 GN=ANKRD13A PE=1 SV=3			2	232.221	234.749	409.427	421.196	646.411	982.543	763.734	821.931	1041.22	1135.33	952.56	1435.88	903.099	819.743	1007.72	1154.67		0.329047	0.332629	0.58014	0.596817	0.915937	1.39222	1.08218	1.16464	1.47536	1.60871	1.34974	2.03458	1.27965	1.16154	1.4279	1.63612		1.01089	1.52	1.09038	0.9077	1.02875	1.0762	1.50739	1.14582
277	Q86YJ7	ANKRD13B	Ankyrin repeat domain-containing protein 13B OS=Homo sapiens OX=9606 GN=ANKRD13B PE=1 SV=4			2	113.913	83.4757	199.134	161.018	350.398	343.948	355.915	303.306	334.536	294.741	409.247	408.579	408.671	268.214	468.917	385.433		0.377346	0.27652	0.659647	0.533385	1.16072	1.13936	1.179	1.00473	1.10818	0.976353	1.35566	1.35345	1.35376	0.88848	1.55333	1.27678		0.732802	0.981592	0.881044	0.656308	0.808591	0.852187	0.998368	0.821964
278	Q8N6S4	ANKRD13C	Ankyrin repeat domain-containing protein 13C OS=Homo sapiens OX=9606 GN=ANKRD13C PE=2 SV=2			1	3.97451	7.24199	8.12751	8.83503	17.0303	13.1132	10.3531	11.2688	13.6723	14.7718	13.8786	17.3158	23.2804	15.4064	10.9933	14.8535		0.274305	0.499814	0.560929	0.609759	1.17536	0.905022	0.71453	0.777728	0.943609	1.01949	0.957847	1.19507	1.60672	1.06329	0.758714	1.02513		1.82211	0.769992	1.08042	0.661776	1.08705	1.08845	1.24766	1.35114
279	Q6ZTN6	ANKRD13D	Ankyrin repeat domain-containing protein 13D OS=Homo sapiens OX=9606 GN=ANKRD13D PE=1 SV=2			1	8.60914	7.10955	18.3852	13.8045	20.57	42.6217	34.6076	34.2882	39.3231	27.8805	43.3573	63.5104	33.6192	34.4301	39.7391	46.7105		0.337212	0.278474	0.720131	0.540709	0.805707	1.66945	1.35555	1.34304	1.54025	1.09205	1.69826	2.48764	1.31683	1.34859	1.55654	1.82961		0.825814	2.07203	0.709011	1.02412	0.750849	0.990771	1.46481	1.17543
280	Q6P6B7	ANKRD16	Ankyrin repeat domain-containing protein 16 OS=Homo sapiens OX=9606 GN=ANKRD16 PE=1 SV=1			1	163.695	181.363	114.762	151.182	496.67	522.551	325.873	299.31	1106.02	731.419	640.486	1003.13	395.77	678.321	1007.38	711.524		0.302837	0.335523	0.21231	0.279688	0.918843	0.966723	0.602867	0.553725	2.04614	1.35313	1.1849	1.8558	0.732177	1.2549	1.86366	1.31632		1.10793	1.05211	0.661307	1.71393	1.31735	0.918487	1.5662	0.706311
281	O75179	ANKRD17	Ankyrin repeat domain-containing protein 17 OS=Homo sapiens OX=9606 GN=ANKRD17 PE=1 SV=3			19	1611.69	1343.49	1721.4	1565.35	3140.06	3793.48	2910	2656.41	4347.12	3475.49	3432.25	3832.66	4619.98	3420.76	4476.56	3779.96		0.46992	0.391721	0.501908	0.456409	0.915546	1.10606	0.848468	0.774528	1.26749	1.01335	1.00074	1.11749	1.34705	0.99739	1.30523	1.10212		0.833591	1.20809	0.799493	0.740427	0.909347	0.912856	1.11666	0.844389
282	Q5TYW2	ANKRD20A1	Ankyrin repeat domain-containing protein 20A1 OS=Homo sapiens OX=9606 GN=ANKRD20A1 PE=2 SV=1			2	296.462	255.139	461.725	417.618	800.252	899.329	870.118	837.917	959.279	916.436	1052.94	1322.11	985.617	822.034	1330.11	1255.26		0.389875	0.335532	0.607211	0.549207	1.05241	1.1827	1.14429	1.10194	1.26154	1.2052	1.38471	1.7387	1.29618	1.08105	1.74922	1.65078		0.860613	1.12381	0.955338	0.83403	0.904473	0.962992	1.25564	0.943726
283	Q9UPS8	ANKRD26	Ankyrin repeat domain-containing protein 26 OS=Homo sapiens OX=9606 GN=ANKRD26 PE=1 SV=4			13	1218.26	977.239	1509.12	1375.24	2208.08	2731.21	2166.82	2028.99	2112.05	2119.14	2270.89	2718.77	3529.9	2705.22	3056.96	3099.02		0.537371	0.431058	0.665669	0.606615	0.973979	1.20473	0.955779	0.894982	0.93162	0.934747	1.00168	1.19924	1.55703	1.19327	1.34842	1.36697		0.80216	1.23692	1.00336	0.766373	0.911286	0.936391	1.19723	1.01376
284	Q96NW4	ANKRD27	Ankyrin repeat domain-containing protein 27 OS=Homo sapiens OX=9606 GN=ANKRD27 PE=1 SV=2			5	260.077	295.098	376.098	318.713	657.964	792.18	631.556	728.936	870.798	856.988	1095.06	959.061	913.717	788.122	1609.65	858.692		0.384935	0.436769	0.556655	0.471721	0.97384	1.17249	0.934754	1.07888	1.28885	1.26841	1.62078	1.41949	1.35237	1.16648	2.38241	1.27093		1.13466	1.20399	0.984141	0.862545	0.84742	1.15419	0.875807	0.533465
285	O15084	ANKRD28	Serine/threonine-protein phosphatase 6 regulatory ankyrin repeat subunit A OS=Homo sapiens OX=9606 GN=ANKRD28 PE=1 SV=5			3	332.477	205.861	412.783	350.982	1069.85	1119.96	919.791	927.029	1191.57	1077.01	1120.32	1353.09	1018.23	805.147	1225.65	1269.57		0.368179	0.227967	0.457108	0.388671	1.18473	1.24022	1.01856	1.02657	1.31952	1.19266	1.24062	1.49839	1.12757	0.891604	1.35726	1.4059		0.619174	1.04684	0.903858	0.790732	0.850282	1.00787	1.20777	1.03583
286	Q5JPF3	ANKRD36C	Ankyrin repeat domain-containing protein 36C OS=Homo sapiens OX=9606 GN=ANKRD36C PE=1 SV=3			1	8.15871	6.24407	10.1159	6.61091	24.383	24.5568	20.413	17.9656	22.2856	24.8764	27.7475	26.2668	19.4181	19.8699	22.9324	20.6882		0.439554	0.336402	0.544998	0.356165	1.31364	1.32301	1.09976	0.967904	1.20065	1.34023	1.49491	1.41513	1.04616	1.0705	1.23549	1.11458		0.765326	1.00713	1.11625	1.02327	0.653517	0.880106	0.946637	0.902138
287	Q8N9B4	ANKRD42	Ankyrin repeat domain-containing protein 42 OS=Homo sapiens OX=9606 GN=ANKRD42 PE=2 SV=2			1	20.4669	17.5673	20.7689	13.2825	42.2983	53.9692	32.5402	32.8716	39.8444	40.7326	31.4569	43.2532	52.5717	40.081	41.4719	37.732		0.527561	0.45282	0.535345	0.342374	1.09029	1.39113	0.838766	0.847308	1.02704	1.04994	0.810843	1.11491	1.3551	1.03314	1.06899	0.972591		0.858327	1.27592	1.02229	0.762406	0.639538	1.01018	1.375	0.909821
288	Q8N8A2	ANKRD44	Serine/threonine-protein phosphatase 6 regulatory ankyrin repeat subunit B OS=Homo sapiens OX=9606 GN=ANKRD44 PE=1 SV=3			3	156.623	119.228	199.119	183.241	593.792	611.69	483.099	546.396	641.193	571.197	625.958	740.018	566.805	422.363	753.012	745.591		0.319898	0.24352	0.406695	0.374264	1.2128	1.24936	0.986715	1.116	1.30962	1.16665	1.2785	1.51146	1.15768	0.862664	1.538	1.52285		0.761242	1.03014	0.890835	0.745165	0.920259	1.13102	1.18222	0.990145
289	Q8WVL7	ANKRD49	Ankyrin repeat domain-containing protein 49 OS=Homo sapiens OX=9606 GN=ANKRD49 PE=1 SV=1			2	55.9773	63.8854	100.68	69.7797	194.161	225.793	183.629	191.75	216.996	193.437	255.571	267.636	212.196	180.035	290.273	244.8		0.329603	0.376167	0.592819	0.410873	1.14325	1.3295	1.08124	1.12905	1.27771	1.13899	1.50484	1.57588	1.24944	1.06007	1.70917	1.44142		1.14127	1.16292	0.891431	0.848437	0.693084	1.04423	1.04721	0.843344
290	Q9ULJ7	ANKRD50	Ankyrin repeat domain-containing protein 50 OS=Homo sapiens OX=9606 GN=ANKRD50 PE=1 SV=4			3	279.782	252.012	512.357	445.288	915.147	917.324	833.814	837.137	754.114	831.622	856.993	1075.65	945.461	733.744	1135.21	1095.13		0.386639	0.348263	0.708041	0.615357	1.26467	1.26768	1.15227	1.15686	1.04213	1.14924	1.1843	1.48647	1.30656	1.01398	1.56878	1.51339		0.900744	1.00238	1.10278	0.77607	0.869097	1.00399	1.25514	0.964694
291	Q8NB46	ANKRD52	Serine/threonine-protein phosphatase 6 regulatory ankyrin repeat subunit C OS=Homo sapiens OX=9606 GN=ANKRD52 PE=1 SV=3			6	301.436	208.291	281.85	254.343	914.18	916.422	646.555	671.875	876.566	868.26	753.491	917.081	873.044	728.45	867.754	850.679		0.406628	0.280978	0.380207	0.343101	1.2332	1.23623	0.872183	0.906339	1.18246	1.17126	1.01644	1.23711	1.17771	0.982657	1.17057	1.14754		0.690996	1.00245	0.990524	0.834379	0.902406	1.03916	1.21711	0.980323
292	Q6NXT1	ANKRD54	Ankyrin repeat domain-containing protein 54 OS=Homo sapiens OX=9606 GN=ANKRD54 PE=1 SV=2			1	230.797	184.009	267.234	238.312	856.798	917.868	714.86	715.778	1251.92	995.872	1112.04	1222.18	1032.65	923.198	1394.46	960.67		0.273767	0.218268	0.316988	0.282681	1.01632	1.08876	0.847954	0.849043	1.485	1.18129	1.31908	1.44973	1.22491	1.09508	1.65408	1.13953		0.797276	1.07128	0.795476	0.894009	0.891773	1.00128	1.09904	0.688919
293	C9JTQ0	ANKRD63	Ankyrin repeat domain-containing protein 63 OS=Homo sapiens OX=9606 GN=ANKRD63 PE=3 SV=1			1	6.52661	6.72843	7.05806	6.08791	16.8286	20.8545	18.4644	24.1812	22.6572	15.6401	27.6074	35.9611	16.9946	19.5472	27.7331	28.5592		0.414342	0.427154	0.448081	0.386491	1.06836	1.32395	1.17221	1.53514	1.43839	0.992912	1.75266	2.28299	1.0789	1.24095	1.76064	1.81308		1.03092	1.23923	0.690293	1.1502	0.862547	1.30961	1.30259	1.02979
294	Q92625	ANKS1A	Ankyrin repeat and SAM domain-containing protein 1A OS=Homo sapiens OX=9606 GN=ANKS1A PE=1 SV=4			4	38.9658	31.8364	50.1171	39.9299	122.909	141.575	93.4083	103.208	128.658	131.701	141.645	144.672	134.216	118.663	165.909	123.608		0.366954	0.299814	0.471969	0.376033	1.15747	1.33326	0.879657	0.971944	1.21161	1.24027	1.33392	1.36242	1.26396	1.11749	1.56242	1.16406		0.817034	1.15187	1.02365	0.88412	0.796732	1.10491	1.02137	0.745035
295	Q6ZW76	ANKS3	Ankyrin repeat and SAM domain-containing protein 3 OS=Homo sapiens OX=9606 GN=ANKS3 PE=1 SV=1			2	71.6593	59.8731	106.687	85.4231	261.024	257.629	234.07	226.635	230.729	219.112	268.343	281.62	247.691	192.3	312.407	285.08		0.353392	0.295267	0.526133	0.421269	1.28725	1.27051	1.15433	1.11766	1.13785	1.08056	1.32335	1.38882	1.2215	0.948338	1.54065	1.40589		0.835524	0.986994	0.949651	0.776371	0.800689	0.968236	1.04948	0.912528
296	Q9H8Y5	ANKZF1	Ankyrin repeat and zinc finger domain-containing protein 1 OS=Homo sapiens OX=9606 GN=ANKZF1 PE=1 SV=1			8	337.745	349.857	450.072	375.818	975.613	1221.77	813.478	899.399	1187.17	1083.45	948.416	1157.64	1176.54	998.783	1252.28	1125.29		0.367407	0.380583	0.489599	0.408824	1.06129	1.32907	0.88492	0.978387	1.29143	1.1786	1.03171	1.25931	1.27987	1.0865	1.36226	1.22412		1.03586	1.25231	0.912633	0.848915	0.835018	1.10562	1.2206	0.898593
297	Q9NQW6	ANLN	Anillin OS=Homo sapiens OX=9606 GN=ANLN PE=1 SV=2			14	853.59	727.298	1047.82	884.761	2057.11	2176.51	1754.31	1583.6	2087.91	1990.9	1774.59	1983.65	2833.41	2076.38	2379.02	2196.93		0.435949	0.371448	0.535147	0.451869	1.05062	1.1116	0.895968	0.808782	1.06635	1.0168	0.906326	1.0131	1.44709	1.06046	1.21502	1.12202		0.852046	1.05804	0.953537	0.73282	0.844383	0.902691	1.11781	0.92346
298	Q9NW15	ANO10	Anoctamin-10 OS=Homo sapiens OX=9606 GN=ANO10 PE=1 SV=2			2	36.1228	25.4416	81.1371	99.2998	82.4106	196.425	320.734	131.871	690.186	288.894	450.637	839.426	748.13	451.443	340.527	470.96		0.09281	0.0653669	0.208465	0.25513	0.211737	0.504673	0.824059	0.338815	1.77329	0.742253	1.15782	2.15673	1.92216	1.15989	0.874913	1.21003		0.704309	2.38349	0.418574	0.603429	1.22385	0.411154	1.86275	1.38303
299	Q4KMQ2	ANO6	Anoctamin-6 OS=Homo sapiens OX=9606 GN=ANO6 PE=1 SV=2			6	112.796	84.0418	259.339	497.928	264.939	469.108	756.7	372.589	2012.15	1006.56	1177.58	2683.66	1829.54	1108.56	1121.85	1487.13		0.10693	0.0796713	0.245852	0.472034	0.251161	0.444713	0.717349	0.353213	1.90751	0.954215	1.11634	2.5441	1.7344	1.05091	1.06351	1.40979		0.745078	1.77063	0.500241	0.605923	1.91999	0.492387	2.27896	1.32561
300	Q9HCE9	ANO8	Anoctamin-8 OS=Homo sapiens OX=9606 GN=ANO8 PE=1 SV=3			1	14.5076	13.4063	21.0014	18.5147	30.6688	38.7158	45.0412	45.7764	47.1654	35.1519	66.6075	72.3611	42.67	32.1725	80.9832	56.8335		0.429817	0.397189	0.622209	0.548536	0.908626	1.14703	1.33444	1.35622	1.39737	1.04145	1.97338	2.14385	1.26419	0.953176	2.39929	1.68381		0.924088	1.26238	0.74529	0.753984	0.881594	1.01632	1.08638	0.701794
301	P39687	ANP32A	Acidic leucine-rich nuclear phosphoprotein 32 family member A OS=Homo sapiens OX=9606 GN=ANP32A PE=1 SV=1			3	531.689	589.319	715.149	622.861	1165.26	1194.98	1070.64	957.293	1023.56	758.326	1073.8	1399.85	1169.72	960.111	986.258	967.33		0.546692	0.605948	0.735328	0.640436	1.19814	1.2287	1.10085	0.984305	1.05244	0.779724	1.1041	1.43935	1.20273	0.987203	1.01409	0.994625		1.10839	1.02551	0.740871	0.820804	0.870953	0.894132	1.30364	0.980808
302	Q92688	ANP32B	Acidic leucine-rich nuclear phosphoprotein 32 family member B OS=Homo sapiens OX=9606 GN=ANP32B PE=1 SV=1			3	81.115	119.113	215.793	161.379	180.791	193.951	242.653	193.651	108.048	104.014	183.947	231.587	216.412	163.04	195.197	192.304		0.55334	0.812551	1.47207	1.10088	1.2333	1.32307	1.6553	1.32102	0.737069	0.70955	1.25483	1.57981	1.47629	1.11221	1.33157	1.31184		1.46845	1.07279	0.962665	0.753378	0.747842	0.798057	1.25899	0.985179
303	Q9BTT0	ANP32E	Acidic leucine-rich nuclear phosphoprotein 32 family member E OS=Homo sapiens OX=9606 GN=ANP32E PE=1 SV=1			3	215.712	195.291	258.133	262.341	811.923	897.424	794.424	779.726	954.176	865.533	967.726	1160.82	1064.84	964.901	1143.38	1079.32		0.283212	0.256401	0.338907	0.344432	1.06599	1.17824	1.04301	1.02372	1.25275	1.13637	1.27054	1.52406	1.39805	1.26683	1.50116	1.41706		0.905332	1.10531	0.9071	0.906146	1.0163	0.981499	1.19953	0.943973
304	P50995	ANXA11	Annexin A11 OS=Homo sapiens OX=9606 GN=ANXA11 PE=1 SV=1			6	237.744	102.359	140.032	765.708	222.417	399.028	475.301	318.157	1056.61	1100.19	802.96	1233.03	2178.97	1465.5	1078.76	1416.65		0.257317	0.110786	0.15156	0.828746	0.240728	0.431879	0.514431	0.34435	1.1436	1.19077	0.869065	1.33454	2.35836	1.58615	1.16757	1.53328		0.430543	1.79405	1.04125	0.672565	5.46809	0.66938	1.53561	1.31322
305	P07355	ANXA2	Annexin A2 OS=Homo sapiens OX=9606 GN=ANXA2 PE=1 SV=2			2	59.2014	62.8223	89.3461	71.931	98.9061	137.785	155.28	85.1444	456.03	295.004	198.031	372.309	215.037	283.343	267.398	272.559		0.285592	0.303059	0.431012	0.347001	0.47713	0.664685	0.749082	0.410743	2.19992	1.42312	0.955316	1.79605	1.03735	1.36687	1.28995	1.31485		1.06116	1.39309	0.646896	1.31765	0.805083	0.548328	1.88005	1.0193
306	P12429	ANXA3	Annexin A3 OS=Homo sapiens OX=9606 GN=ANXA3 PE=1 SV=3			1	4.23658	3.62524	8.54285	8.11288	6.15236	16.2066	12.9594	9.78388	15.5034	12.5106	14.712	31.7291	7.88581	7.9189	7.12649	9.6943		0.501695	0.4293	1.01164	0.960725	0.728561	1.91918	1.53465	1.1586	1.83591	1.4815	1.74219	3.75735	0.933836	0.937754	0.843917	1.148		0.8557	2.63421	0.806958	1.0042	0.949669	0.754964	2.15668	1.36032
307	P09525	ANXA4	Annexin A4 OS=Homo sapiens OX=9606 GN=ANXA4 PE=1 SV=4			6	124.42	72.0681	149.603	972.777	115.046	363.362	805.965	486.292	1638.9	1002.82	1324.33	3644.47	1271.91	2055.48	2549.39	2228.25		0.15798	0.091507	0.189955	1.23516	0.146077	0.461372	1.02336	0.61746	2.08096	1.27331	1.68154	4.62749	1.61498	2.6099	3.23704	2.82928		0.579232	3.15841	0.611886	1.61606	6.50239	0.603366	2.75193	0.874033
308	P08758	ANXA5	Annexin A5 OS=Homo sapiens OX=9606 GN=ANXA5 PE=1 SV=2			8	330.906	396.853	434.992	474.503	416.122	729.204	856.298	566.728	2125.44	797.479	1322.75	4059.85	786.061	972.822	1457.87	1130.8		0.361791	0.433894	0.475592	0.518791	0.454961	0.797265	0.936221	0.619624	2.32382	0.871912	1.44621	4.43878	0.859428	1.06362	1.59394	1.23634		1.19929	1.75238	0.375207	1.23759	1.09083	0.661835	3.06925	0.775652
309	P08133	ANXA6	Annexin A6 OS=Homo sapiens OX=9606 GN=ANXA6 PE=1 SV=3			20	306.846	183.31	397.515	1814.92	486.402	1256.07	1804.94	809.086	4149.95	2902.61	2289.61	4437.21	3436.73	4249.97	3430.71	2667.37		0.146467	0.0874996	0.189746	0.866318	0.232175	0.599561	0.861554	0.386202	1.9809	1.38551	1.0929	2.11802	1.64046	2.02864	1.63758	1.27322		0.597401	2.58237	0.699433	1.23663	4.56566	0.448262	1.93798	0.777498
310	P20073	ANXA7	Annexin A7 OS=Homo sapiens OX=9606 GN=ANXA7 PE=1 SV=3			4	452.424	386.584	334.77	944.249	638.588	1097.85	914.18	670.757	2205.15	2574.57	1695.27	2519.03	3785.65	2943.59	2307.67	3374.48		0.255541	0.218353	0.189087	0.533338	0.360692	0.620096	0.516354	0.378862	1.24553	1.45419	0.957535	1.42282	2.13824	1.66262	1.30343	1.906		0.854473	1.71918	1.16753	0.777565	2.82059	0.733725	1.48592	1.46229
311	P19801	AOC1	Amiloride-sensitive amine oxidase [copper-containing] OS=Homo sapiens OX=9606 GN=AOC1 PE=1 SV=4			1	120.119	79.2902	145.641	141.641	197.098	277.843	194.355	191.143	180.699	166.805	158.103	276.888	266.681	194.711	196.74	274.452		0.628404	0.414808	0.761923	0.740997	1.03112	1.45354	1.01677	0.999967	0.945329	0.872643	0.827118	1.44854	1.39515	1.01863	1.02925	1.4358		0.660097	1.40967	0.92311	0.730127	0.972535	0.983474	1.75131	1.395
312	Q10567	AP1B1	AP-1 complex subunit beta-1 OS=Homo sapiens OX=9606 GN=AP1B1 PE=1 SV=2			21	1738.34	1699.27	2245.27	2140.92	3291.22	5088.2	3380.06	3709.18	4627.74	4519.02	3693.44	5711.09	4237.67	4281.32	4479.74	4869.8		0.500423	0.489176	0.646355	0.616315	0.947457	1.46476	0.973031	1.06778	1.33221	1.30091	1.06325	1.64407	1.21991	1.23248	1.2896	1.40189		0.977525	1.54599	0.976507	1.0103	0.953525	1.09737	1.54628	1.08707
313	O43747	AP1G1	AP-1 complex subunit gamma-1 OS=Homo sapiens OX=9606 GN=AP1G1 PE=1 SV=5			13	838.049	795.026	1176.92	1016.86	1766.35	2224.56	1674.79	1716.2	1757.02	1791.98	1593.37	2460.31	1887.7	1674.79	1922.38	2431.74		0.536427	0.508888	0.753335	0.650882	1.13062	1.42392	1.07202	1.09852	1.12465	1.14703	1.0199	1.57482	1.2083	1.07202	1.2305	1.55653		0.948663	1.25941	1.0199	0.887212	0.864001	1.02473	1.54409	1.26496
314	O75843	AP1G2	AP-1 complex subunit gamma-like 2 OS=Homo sapiens OX=9606 GN=AP1G2 PE=1 SV=1			4	150.212	131.021	202.722	184.162	356.102	455.474	365.554	367.278	527.614	504.791	464.592	579.195	372.643	361.581	543.595	525.106		0.427172	0.372597	0.5765	0.523719	1.01268	1.29527	1.03956	1.04446	1.50043	1.43552	1.3212	1.64711	1.05972	1.02826	1.54587	1.49329		0.872241	1.27905	0.956743	0.970315	0.908446	1.00472	1.24667	0.965988
315	Q9BXS5	AP1M1	AP-1 complex subunit mu-1 OS=Homo sapiens OX=9606 GN=AP1M1 PE=1 SV=3			12	1023.31	841.463	1327.02	1165.55	2166.59	2996.03	2237.42	2271.42	2581.4	2435.9	2254.42	3180.59	2511.75	2203.73	2856.06	3075.25		0.494171	0.406354	0.640836	0.56286	1.04628	1.44682	1.08048	1.0969	1.24659	1.17633	1.08869	1.53595	1.21296	1.06421	1.37923	1.48508		0.822295	1.38283	0.943635	0.877368	0.878321	1.0152	1.41082	1.07675
316	P61966	AP1S1	AP-1 complex subunit sigma-1A OS=Homo sapiens OX=9606 GN=AP1S1 PE=1 SV=1			3	333.798	409.855	562.261	478.128	867.174	917.404	803.465	923.562	595.965	739.202	696.339	912.504	728.202	732.571	1009.52	1061.59		0.52876	0.64924	0.890661	0.757389	1.37367	1.45323	1.27275	1.46299	0.944051	1.17095	1.10305	1.44547	1.15352	1.16044	1.59915	1.68163		1.22785	1.05792	1.24034	1.006	0.850367	1.14947	1.31043	1.05158
317	P56377	AP1S2	AP-1 complex subunit sigma-2 OS=Homo sapiens OX=9606 GN=AP1S2 PE=1 SV=1			1	118.082	92.7698	189.572	154.088	209.017	334.052	309.999	327.187	291.12	249.947	269.409	515.851	241.367	207.934	367.116	421.892		0.549483	0.431695	0.882155	0.717034	0.97264	1.55448	1.44255	1.52253	1.3547	1.1631	1.25367	2.40046	1.12318	0.967601	1.70834	1.96323		0.785639	1.5982	0.85857	0.861485	0.81282	1.05545	1.91475	1.14921
318	O95782	AP2A1	AP-2 complex subunit alpha-1 OS=Homo sapiens OX=9606 GN=AP2A1 PE=1 SV=3			18	1823.34	1757.73	2615.89	2602.2	3707.82	5222.4	3956.68	3889.19	4613.51	4435.34	3594.05	6141.23	5018.47	4454.9	5003.71	5116.69		0.480993	0.463685	0.690066	0.686454	0.978114	1.37766	1.04376	1.02596	1.21703	1.17003	0.948102	1.62004	1.32386	1.17519	1.31997	1.34977		0.964017	1.40848	0.961381	0.887701	0.994767	0.982943	1.70872	1.02258
319	O94973	AP2A2	AP-2 complex subunit alpha-2 OS=Homo sapiens OX=9606 GN=AP2A2 PE=1 SV=2			8	413.276	296.851	671.802	564.721	968.733	1200.52	1093.03	985.919	1441.36	1161.8	1148.66	1562.58	1294.3	933.331	1238.34	1394.28		0.401466	0.288368	0.652604	0.548583	0.94105	1.16621	1.06179	0.957745	1.40017	1.1286	1.11584	1.51793	1.25731	0.90666	1.20295	1.35444		0.718288	1.23927	0.806044	0.721109	0.840606	0.902005	1.36035	1.12593
320	P63010	AP2B1	AP-2 complex subunit beta OS=Homo sapiens OX=9606 GN=AP2B1 PE=1 SV=1			13	756.048	731.092	1238.43	1214.14	1786.67	2563.09	2058.48	1991.73	2656.48	2300.91	2123.42	3209.87	2587.81	2275.81	2795.98	2740.45		0.388364	0.375544	0.636152	0.623675	0.91777	1.3166	1.05739	1.0231	1.36457	1.18192	1.09075	1.64883	1.3293	1.16903	1.43623	1.4077		0.966992	1.43456	0.86615	0.879435	0.980386	0.967573	1.51165	0.980139
321	Q96CW1	AP2M1	AP-2 complex subunit mu OS=Homo sapiens OX=9606 GN=AP2M1 PE=1 SV=2			16	889.255	991.594	1542.07	1339.7	1919.67	2544.2	2193.35	2367.65	2218.47	2073.2	2411.6	2881.04	2941.11	2302.38	3493.24	2874.18		0.446385	0.497757	0.774082	0.672498	0.963629	1.27713	1.10101	1.1885	1.11362	1.0407	1.21057	1.44621	1.47637	1.15574	1.75352	1.44277		1.11508	1.32533	0.934518	0.782827	0.868767	1.07947	1.19466	0.822783
322	P53680	AP2S1	AP-2 complex subunit sigma OS=Homo sapiens OX=9606 GN=AP2S1 PE=1 SV=2			4	207.669	183.586	294.102	288.006	449.515	658.959	480.034	524.044	797.83	595.227	528.348	1030.34	534.683	543.135	781.986	707.138		0.417489	0.369073	0.59125	0.578995	0.903685	1.32474	0.965039	1.05352	1.60392	1.19662	1.06217	2.07135	1.0749	1.09189	1.57207	1.4216		0.884032	1.46593	0.746057	1.01581	0.979272	1.09168	1.95012	0.904285
323	O00203	AP3B1	AP-3 complex subunit beta-1 OS=Homo sapiens OX=9606 GN=AP3B1 PE=1 SV=3			7	478.989	502.871	913.558	548.042	1326.52	1375.49	1118.59	1105.48	1603.53	1556.72	1549.09	1895.06	1620.43	1151.54	1906.32	1412.1		0.380946	0.39994	0.726564	0.435865	1.055	1.09394	0.889629	0.879202	1.27531	1.23808	1.23201	1.50717	1.28875	0.915834	1.51612	1.12306		1.04986	1.03692	0.970808	0.710639	0.599898	0.98828	1.22334	0.740747
324	Q13367	AP3B2	AP-3 complex subunit beta-2 OS=Homo sapiens OX=9606 GN=AP3B2 PE=1 SV=2			2	13.476	12.801	73.2456	48.7623	79.0502	60.0064	154.115	147.118	80.9628	64.6424	189.173	199.352	86.5409	58.6671	237.182	244.712		0.207299	0.196916	1.12673	0.750103	1.21602	0.923069	2.37073	2.26309	1.24544	0.994384	2.91002	3.0666	1.33125	0.902467	3.64853	3.76437		0.949911	0.759092	0.798421	0.677912	0.665737	0.954599	1.05381	1.03175
325	O14617	AP3D1	AP-3 complex subunit delta-1 OS=Homo sapiens OX=9606 GN=AP3D1 PE=1 SV=1			17	1571.69	1289.44	2046.26	1550.21	3634.55	4062.7	3306.85	2875.07	4538.03	3903.53	3446.91	4075.83	4782.96	3261.77	4303.92	4172.53		0.432757	0.355041	0.563427	0.426843	1.00076	1.11864	0.910525	0.791636	1.24952	1.07482	0.949089	1.12226	1.31696	0.898112	1.18506	1.14889		0.820416	1.1178	0.860182	0.681956	0.757582	0.869429	1.18246	0.969472
326	Q9Y2T2	AP3M1	AP-3 complex subunit mu-1 OS=Homo sapiens OX=9606 GN=AP3M1 PE=1 SV=1			8	222.253	206.337	403.304	302.77	734.187	766.928	625.748	603.246	772.12	705.314	732.582	884.886	798.459	665.511	883.296	853.605		0.351803	0.326609	0.638387	0.479252	1.16214	1.21396	0.990492	0.954874	1.22218	1.11644	1.1596	1.40068	1.26387	1.05343	1.39816	1.35117		0.928388	1.04459	0.913477	0.833494	0.750724	0.96404	1.2079	0.966386
327	P53677	AP3M2	AP-3 complex subunit mu-2 OS=Homo sapiens OX=9606 GN=AP3M2 PE=2 SV=1			1	12.7553	8.60538	21.1267	19.7134	40.0546	35.1658	46.3574	51.7885	49.4442	43.3653	64.464	76.9452	40.4613	31.5802	79.1689	69.3211		0.357503	0.24119	0.592135	0.552523	1.12264	0.98562	1.2993	1.45152	1.38581	1.21543	1.80678	2.15661	1.13404	0.885124	2.21893	1.94292		0.674651	0.877947	0.877055	0.780504	0.933104	1.11716	1.19362	0.87561
328	Q92572	AP3S1	AP-3 complex subunit sigma-1 OS=Homo sapiens OX=9606 GN=AP3S1 PE=1 SV=1			2	24.7075	14.2726	17.7656	16.9382	65.1353	82.7229	52.4058	59.5582	106.57	91.406	73.9318	103.835	70.204	78.6268	130.278	91.2288		0.370682	0.214129	0.266534	0.254121	0.977212	1.24108	0.786234	0.89354	1.59885	1.37135	1.10918	1.55782	1.05326	1.17962	1.95454	1.36869		0.577663	1.27002	0.857709	1.11998	0.953427	1.13648	1.40447	0.700263
329	P59780	AP3S2	AP-3 complex subunit sigma-2 OS=Homo sapiens OX=9606 GN=AP3S2 PE=2 SV=1			2	411.394	326.723	552.94	474.215	1028.85	1304.21	1096.65	1073.83	1889.59	1363.47	1279.32	1930.39	1192.98	1242.27	2405.08	1616.26		0.363839	0.288956	0.489023	0.419398	0.90992	1.15345	0.969883	0.949701	1.67116	1.20586	1.13144	1.70725	1.05508	1.09867	2.12707	1.42943		0.794185	1.26764	0.721569	1.04132	0.857625	0.979191	1.50892	0.672019
330	Q9Y6B7	AP4B1	AP-4 complex subunit beta-1 OS=Homo sapiens OX=9606 GN=AP4B1 PE=1 SV=2			1	21.3288	12.489	26.7235	18.7566	65.9704	73.8861	61.4757	54.4188	70.5442	61.1512	57.6694	77.834	69.8789	58.6759	86.0728	82.4024		0.374646	0.219372	0.469405	0.329464	1.15879	1.29783	1.07984	0.95588	1.23913	1.07414	1.01298	1.36717	1.22744	1.03066	1.51189	1.44742		0.585546	1.11999	0.866849	0.83968	0.701877	0.885208	1.34966	0.957357
331	Q9UPM8	AP4E1	AP-4 complex subunit epsilon-1 OS=Homo sapiens OX=9606 GN=AP4E1 PE=1 SV=2			1	8.12496	4.71357	6.0852	10.6634	31.2857	32.8737	21.2086	27.5445	33.7975	29.0363	31.139	37.6253	28.6711	19.0922	36.4691	33.111		0.319003	0.185065	0.238918	0.418668	1.22834	1.29069	0.832695	1.08146	1.32696	1.14003	1.22258	1.47725	1.12569	0.749601	1.43186	1.30001		0.580135	1.05076	0.859126	0.665904	1.75235	1.29874	1.2083	0.907919
332	O00189	AP4M1	AP-4 complex subunit mu-1 OS=Homo sapiens OX=9606 GN=AP4M1 PE=1 SV=2			3	81.3974	74.3657	104.188	91.9474	324.051	339.271	271.755	259.708	316.278	270.307	316.651	336.798	374.547	293.323	462.603	385.222		0.296997	0.27134	0.380153	0.335491	1.18237	1.23791	0.991559	0.947603	1.15401	0.986276	1.15537	1.22888	1.36662	1.07025	1.68791	1.40557		0.913613	1.04697	0.85465	0.783141	0.882514	0.95567	1.06363	0.832727
333	Q2VPB7	AP5B1	AP-5 complex subunit beta-1 OS=Homo sapiens OX=9606 GN=AP5B1 PE=1 SV=4			2	181.353	140.993	285.272	271.271	645.463	705.448	650.802	703.479	740.518	648.124	776.387	999.266	693.637	619.199	987.469	831.701		0.320841	0.249438	0.504689	0.479919	1.14192	1.24804	1.15137	1.24456	1.31009	1.14663	1.37355	1.76785	1.22715	1.09546	1.74698	1.4714		0.777451	1.09293	0.875231	0.892685	0.950921	1.08094	1.28707	0.842255
334	Q9H0R1	AP5M1	AP-5 complex subunit mu-1 OS=Homo sapiens OX=9606 GN=AP5M1 PE=1 SV=2			1	26.2753	26.7841	36.8869	29.8341	83.6214	84.7246	83.1998	85.4173	100.763	77.4684	102.993	117.133	103.932	87.7329	150.651	117.833		0.334088	0.340557	0.469013	0.379337	1.06324	1.07726	1.05788	1.08607	1.28119	0.985002	1.30955	1.48933	1.32148	1.11551	1.91551	1.49823		1.01936	1.01319	0.768818	0.844138	0.808799	1.02665	1.13729	0.782159
335	Q9NUS5	AP5S1	AP-5 complex subunit sigma-1 OS=Homo sapiens OX=9606 GN=AP5S1 PE=1 SV=1			1	12.1852	7.9861	20.4433	13.3357	29.597	30.1077	27.9525	23.484	47.8185	37.259	34.7071	77.8811	37.3164	20.9506	60.6567	40.5136		0.384037	0.251695	0.644304	0.420296	0.932798	0.948893	0.880969	0.740137	1.50708	1.17428	1.09385	2.45455	1.17609	0.660292	1.9117	1.27685		0.655393	1.01726	0.779175	0.561431	0.652326	0.84014	2.24395	0.667916
336	O14727	APAF1	Apoptotic protease-activating factor 1 OS=Homo sapiens OX=9606 GN=APAF1 PE=1 SV=2			9	303.578	252.415	475.484	370.501	1017.96	1021.01	1067.04	1099	1107.26	975.449	1378.34	1418.15	1203.59	940.008	1733.29	1433.92		0.334301	0.27796	0.523605	0.407997	1.12098	1.12434	1.17503	1.21022	1.21932	1.07417	1.51783	1.56167	1.3254	1.03514	1.90871	1.57904		0.831467	1.003	0.880957	0.781003	0.779208	1.02995	1.02888	0.827282
337	Q99767	APBA2	Amyloid-beta A4 precursor protein-binding family A member 2 OS=Homo sapiens OX=9606 GN=APBA2 PE=1 SV=3			1	37.1138	35.2653	48.9793	49.4113	125.486	128.071	120.837	110.587	123.741	96.7534	148.713	152.311	158.225	119.603	201.503	144.865		0.333933	0.317301	0.440693	0.44458	1.12907	1.15232	1.08724	0.995011	1.11336	0.870543	1.33805	1.37042	1.42364	1.07613	1.81303	1.30343		0.950194	1.0206	0.781903	0.755905	1.00882	0.915175	1.02419	0.718922
338	O96018	APBA3	Amyloid-beta A4 precursor protein-binding family A member 3 OS=Homo sapiens OX=9606 GN=APBA3 PE=1 SV=1			1	21.1662	13.8838	38.2323	34.3581	49.2607	59.867	69.4898	50.6948	75.7019	50.0353	90.0026	105.109	71.5488	55.4815	90.6725	61.5371		0.388946	0.255126	0.702549	0.631358	0.905205	1.1001	1.27693	0.931557	1.39108	0.919439	1.65387	1.93146	1.31477	1.01952	1.66618	1.13079		0.655942	1.21531	0.660952	0.775436	0.898667	0.729529	1.16784	0.678674
339	O00213	APBB1	Amyloid-beta A4 precursor protein-binding family B member 1 OS=Homo sapiens OX=9606 GN=APBB1 PE=1 SV=2			9	310.415	262.043	585.016	482.892	1120.82	1107.95	1195.04	1255.64	1277.97	1079.73	1658.11	1817.21	1239.81	955.313	1985.02	1618.46		0.314423	0.265426	0.592569	0.489127	1.13529	1.12225	1.21047	1.27185	1.29447	1.09367	1.67952	1.84067	1.25582	0.967647	2.01065	1.63936		0.84417	0.988517	0.844879	0.770532	0.825434	1.05071	1.09595	0.815337
340	Q92870	APBB2	Amyloid-beta A4 precursor protein-binding family B member 2 OS=Homo sapiens OX=9606 GN=APBB2 PE=1 SV=3			1	10.7255	10.4439	29.3985	23.3653	38.0637	44.9246	48.2496	44.3155	61.2067	42.0798	55.2298	67.5087	55.8911	51.3781	52.8589	61.6024		0.258622	0.251832	0.70888	0.563403	0.917822	1.08326	1.16343	1.06857	1.47586	1.01466	1.33175	1.62782	1.34769	1.23887	1.27458	1.48541		0.973745	1.18025	0.687503	0.919254	0.794779	0.918464	1.22232	1.16541
341	P25054	APC	Adenomatous polyposis coli protein OS=Homo sapiens OX=9606 GN=APC PE=1 SV=2			15	814.937	645.382	874.037	822.569	1997.98	2352.73	1740.35	1641.4	2166.83	2207.47	2135.1	2495.78	2741.07	2131.4	2717.57	2370.84		0.422202	0.334359	0.452821	0.426156	1.03511	1.2189	0.90164	0.850376	1.12259	1.14365	1.10615	1.29301	1.42009	1.10424	1.40792	1.22828		0.791941	1.17755	1.01876	0.77758	0.941115	0.943144	1.16893	0.872412
342	P13798	APEH	Acylamino-acid-releasing enzyme OS=Homo sapiens OX=9606 GN=APEH PE=1 SV=4			1	8.02584	8.54505	8.03913	5.60663	14.6613	20.219	15.4982	12.8944	18.2569	11.2582	20.352	24.1347	16.7564	16.7284	22.3932	23.8093		0.55638	0.592373	0.557301	0.388672	1.01637	1.40165	1.07439	0.893886	1.26563	0.780459	1.41087	1.6731	1.16161	1.15967	1.55238	1.65055		1.06469	1.37907	0.616655	0.998329	0.697418	0.831993	1.18586	1.06324
343	P27695	APEX1	DNA-(apurinic or apyrimidinic site) lyase OS=Homo sapiens OX=9606 GN=APEX1 PE=1 SV=2			4	154.483	166.386	212.602	197.593	286.698	671.211	363.573	310.492	843.547	1009.13	468.923	793.06	583.934	514.93	340.267	373.226		0.330682	0.356161	0.455089	0.422961	0.613697	1.43677	0.778253	0.66463	1.80567	2.16011	1.00376	1.6976	1.24995	1.10224	0.728365	0.798916		1.07705	2.34118	1.19629	0.881829	0.929403	0.854002	1.69124	1.09686
344	Q9UBZ4	APEX2	DNA-(apurinic or apyrimidinic site) lyase 2 OS=Homo sapiens OX=9606 GN=APEX2 PE=1 SV=1			2	13.9753	13.4539	20.7755	12.7466	48.888	53.2658	32.5226	33.5526	55.7686	50.7585	45.3785	52.9079	67.0216	53.0852	58.8363	54.4971		0.301105	0.289871	0.447619	0.274632	1.05332	1.14764	0.700716	0.722908	1.20156	1.09362	0.977703	1.13993	1.44401	1.14375	1.26766	1.17417		0.962691	1.08955	0.910163	0.792061	0.61354	1.03167	1.16592	0.92625
345	Q9BZZ5	API5	Apoptosis inhibitor 5 OS=Homo sapiens OX=9606 GN=API5 PE=1 SV=3			3	325.905	262.66	339.737	337.552	590.122	970.859	677.248	646.051	843.641	1143.33	814.964	1261.32	659.065	571.559	657.321	804.512		0.538968	0.434376	0.561843	0.558229	0.975919	1.60557	1.12	1.06841	1.39518	1.89079	1.34775	2.08592	1.08993	0.94522	1.08705	1.33047		0.80594	1.64518	1.35523	0.867227	0.993569	0.953936	1.5477	1.22393
346	Q96GX9	APIP	Methylthioribulose-1-phosphate dehydratase OS=Homo sapiens OX=9606 GN=APIP PE=1 SV=1			1	19.7637	15.5527	30.3284	29.8528	102.089	91.8327	81.6025	76.0884	85.5833	66.813	91.1215	92.2633	99.7901	74.7108	103.349	98.4579		0.257318	0.202492	0.394867	0.388675	1.32917	1.19564	1.06244	0.99065	1.11427	0.869887	1.18638	1.20124	1.29924	0.972714	1.34558	1.28189		0.786933	0.899536	0.780678	0.748679	0.984318	0.932427	1.01253	0.952674
347	P51693	APLP1	Amyloid-like protein 1 OS=Homo sapiens OX=9606 GN=APLP1 PE=1 SV=3			1	6.18273	3.97303	19.1023	13.3639	22.1677	16.5534	32.0315	20.0176	25.3921	14.0406	41.864	33.6085	24.6258	13.901	40.1806	28.8753		0.315573	0.202788	0.975001	0.682107	1.13146	0.844903	1.63492	1.02172	1.29604	0.716647	2.13678	1.71541	1.25693	0.709521	2.05086	1.47382		0.642601	0.746735	0.552952	0.564489	0.699596	0.624935	0.802802	0.718638
348	Q06481	APLP2	Amyloid-like protein 2 OS=Homo sapiens OX=9606 GN=APLP2 PE=1 SV=2			7	191.757	146.613	505.54	378.322	478.552	507.83	593.626	443.034	705.846	444.797	682.123	787.405	843.815	605.529	873.276	715.211		0.345513	0.264171	0.910895	0.68167	0.862268	0.915021	1.06961	0.79827	1.27181	0.801447	1.22907	1.41877	1.52041	1.09106	1.57349	1.28869		0.764577	1.06118	0.630162	0.717609	0.748352	0.746318	1.15434	0.818998
349	Q9HDC9	APMAP	Adipocyte plasma membrane-associated protein OS=Homo sapiens OX=9606 GN=APMAP PE=1 SV=2			3	138.227	105.487	209.948	175.826	379.851	481.052	526.113	397.591	705.878	497.803	580.69	822.461	652.593	425.794	547.143	635.062		0.294641	0.224853	0.447519	0.374786	0.80968	1.0254	1.12145	0.847494	1.50463	1.0611	1.23778	1.75314	1.39105	0.907611	1.16627	1.35368		0.763143	1.26642	0.705225	0.652465	0.837474	0.755714	1.41635	1.16069
350	P02647	APOA1	Apolipoprotein A-I OS=Homo sapiens OX=9606 GN=APOA1 PE=1 SV=1			1	21.866	23.0512	38.1133	28.7679	51.7848	62.0114	50.6955	42.6947	31.587	40.4966	41.5955	59.1612	59.7527	50.8908	56.4699	53.0791		0.530115	0.558849	0.924012	0.697444	1.25546	1.50339	1.22905	1.03508	0.76579	0.981792	1.00843	1.43429	1.44863	1.23379	1.36905	1.28684		1.0542	1.19748	1.28207	0.85169	0.7548	0.842179	1.4223	0.939954
351	P04114	APOB	Apolipoprotein B-100 OS=Homo sapiens OX=9606 GN=APOB PE=1 SV=2			6	788.726	663.819	5466.55	3950.18	1460.01	1793.25	2258.42	2011.86	1269.06	1112.64	1404.54	2280.93	1955.84	1502.21	2373.18	2997.86		0.576382	0.485103	3.99482	2.8867	1.06694	1.31046	1.6504	1.47022	0.927398	0.81309	1.0264	1.66685	1.42928	1.09778	1.73426	2.19076		0.841634	1.22825	0.876743	0.768064	0.722609	0.890826	1.62397	1.26322
352	Q9NRW3	APOBEC3C	DNA dC->dU-editing enzyme APOBEC-3C OS=Homo sapiens OX=9606 GN=APOBEC3C PE=1 SV=2			1	18.1029	18.2048	21.8863	19.4021	27.8182	45.404	29.8541	38.9743	28.347	31.7054	35.629	51.5906	32.5028	32.6285	39.1056	48.6039		0.678196	0.682014	0.819935	0.726868	1.04216	1.70099	1.11844	1.46011	1.06197	1.18779	1.33478	1.93276	1.21767	1.22237	1.46503	1.82087		1.00563	1.63217	1.11847	1.00387	0.886495	1.30549	1.44799	1.24289
353	Q8IUX4	APOBEC3F	DNA dC->dU-editing enzyme APOBEC-3F OS=Homo sapiens OX=9606 GN=APOBEC3F PE=1 SV=3			2	115.191	122.315	122.064	105.832	238.172	380.571	230.427	249.017	375.114	395.938	248.8	443.346	272.59	263.953	254.136	346.112		0.460273	0.488739	0.487736	0.422877	0.951673	1.52066	0.920726	0.995006	1.49886	1.58206	0.994139	1.77149	1.0892	1.05469	1.01546	1.38297		1.06185	1.59788	1.05551	0.968315	0.867021	1.08068	1.78194	1.36192
354	P02649	APOE	Apolipoprotein E OS=Homo sapiens OX=9606 GN=APOE PE=1 SV=1			1	56.7792	59.0544	399.631	326.663	120.889	149.757	225.204	204.85	178.567	104.48	175.831	244.017	195.683	158.663	290.619	246.891		0.411504	0.427994	2.89631	2.36747	0.876137	1.08536	1.63215	1.48464	1.29416	0.757214	1.27433	1.7685	1.4182	1.1499	2.10625	1.78933		1.04007	1.2388	0.585103	0.810816	0.817412	0.90962	1.38779	0.849535
355	Q6UXV4	APOOL	MICOS complex subunit MIC27 OS=Homo sapiens OX=9606 GN=APOOL PE=1 SV=1			3	51.6045	31.1592	95.9884	111.518	134.058	161.021	377.564	175.58	220.415	111.205	413.95	530.501	299.16	256.046	334.87	331.025		0.292693	0.17673	0.544432	0.632513	0.760357	0.913287	2.14149	0.995863	1.25016	0.630738	2.34786	3.00892	1.69679	1.45225	1.89933	1.87752		0.603808	1.20113	0.504526	0.855883	1.16179	0.465034	1.28156	0.988518
356	P05067	APP	Amyloid-beta precursor protein OS=Homo sapiens OX=9606 GN=APP PE=1 SV=3			4	190.479	120.07	451.172	360.955	551.026	421.939	631.214	475.641	652.545	382.311	741.518	731.299	802.203	488.365	1031.81	722.018		0.346916	0.218682	0.821712	0.657401	1.00357	0.768471	1.14962	0.866277	1.18847	0.696297	1.35051	1.3319	1.46104	0.889451	1.87922	1.315		0.630358	0.765733	0.585877	0.60878	0.800039	0.753534	0.986219	0.699759
357	Q9UKG1	APPL1	DCC-interacting protein 13-alpha OS=Homo sapiens OX=9606 GN=APPL1 PE=1 SV=1			2	140.117	118.831	211.185	187.077	522.862	505.701	519.124	512.635	639.778	515.493	747.895	736.024	526.784	405.413	849.619	601.836		0.306344	0.259805	0.461722	0.409014	1.14315	1.10563	1.13498	1.12079	1.39877	1.12704	1.63515	1.6092	1.15173	0.886371	1.85756	1.31582		0.848084	0.967179	0.805737	0.7696	0.885844	0.9875	0.984127	0.70836
358	Q8NEU8	APPL2	DCC-interacting protein 13-beta OS=Homo sapiens OX=9606 GN=APPL2 PE=1 SV=3			2	101.342	67.713	205.956	204.179	305.093	297.545	455.538	393.009	355.311	277.153	567.273	716.314	334.437	263.576	558.162	526.12		0.3698	0.247086	0.751539	0.745054	1.11329	1.08575	1.66227	1.4341	1.29654	1.01134	2.06999	2.61385	1.22037	0.961796	2.03675	1.91983		0.668163	0.97526	0.780029	0.788119	0.991372	0.862736	1.26273	0.942594
359	P07741	APRT	Adenine phosphoribosyltransferase OS=Homo sapiens OX=9606 GN=APRT PE=1 SV=2			1	25.686	31.5385	41.831	32.7906	39.7093	54.0364	61.5477	41.139	96.4881	53.4765	89.9418	187.826	54.7748	50.4212	86.0767	52.4132		0.474222	0.582272	0.772295	0.605389	0.733123	0.997634	1.13631	0.759519	1.78139	0.987297	1.66053	3.46769	1.01127	0.930889	1.58917	0.967666		1.22785	1.3608	0.554229	0.920518	0.783883	0.668408	2.08831	0.608913
360	Q7Z2E3	APTX	Aprataxin OS=Homo sapiens OX=9606 GN=APTX PE=1 SV=2			5	380.475	303.452	521.09	445.344	821.474	940.529	844.421	713.602	974.194	760.914	881.386	1070.28	1161.03	764.125	996.528	1013.48		0.456045	0.363723	0.624589	0.533798	0.984635	1.12734	1.01214	0.855337	1.16769	0.912046	1.05645	1.28286	1.39163	0.915895	1.19446	1.21478		0.797561	1.14493	0.78107	0.658144	0.854639	0.845078	1.21431	1.01701
361	O60306	AQR	RNA helicase aquarius OS=Homo sapiens OX=9606 GN=AQR PE=1 SV=4			16	1069.03	946.898	1363.13	1198.03	2578.53	3041.15	2125.85	2201.85	2382.8	2699.45	2278.37	2856.38	2649.87	2177.24	2669.73	2931.28		0.492627	0.436347	0.628154	0.552073	1.18823	1.40141	0.979628	1.01465	1.09804	1.24395	1.04991	1.31627	1.22111	1.00331	1.23026	1.35078		0.885754	1.17941	1.13289	0.82164	0.878882	1.03575	1.25369	1.09797
362	P10398	ARAF	Serine/threonine-protein kinase A-Raf OS=Homo sapiens OX=9606 GN=ARAF PE=1 SV=2			3	177.595	124.828	196.436	155.178	580.923	611.998	430.921	418.53	487.598	500.543	442.357	555.668	558.97	419.937	529.456	639.171		0.393544	0.276614	0.435294	0.343868	1.2873	1.35616	0.954904	0.927446	1.0805	1.10918	0.980246	1.23134	1.23866	0.930564	1.17325	1.41638		0.70288	1.05349	1.02655	0.751269	0.789967	0.971245	1.25615	1.20722
363	Q96P48	ARAP1	Arf-GAP with Rho-GAP domain, ANK repeat and PH domain-containing protein 1 OS=Homo sapiens OX=9606 GN=ARAP1 PE=1 SV=3			6	522.806	408.167	492.573	399.649	2321.73	2349.97	1246.55	1280.64	2948.73	2679.53	1703.49	1961.28	2513.43	1918.02	1843.36	1688.99		0.251752	0.196548	0.237193	0.192447	1.118	1.1316	0.600263	0.616678	1.41993	1.2903	0.820297	0.944433	1.21032	0.923602	0.88765	0.813315		0.780724	1.01216	0.908706	0.763109	0.81135	1.02735	1.15133	0.916256
364	Q8WZ64	ARAP2	Arf-GAP with Rho-GAP domain, ANK repeat and PH domain-containing protein 2 OS=Homo sapiens OX=9606 GN=ARAP2 PE=1 SV=3			3	33.693	25.206	28.5012	23.3536	76.7247	76.6894	46.4407	53.382	90.1452	75.6554	83.5766	92.4114	104.012	71.8736	90.5888	75.9365		0.442492	0.331032	0.374308	0.306704	1.00763	1.00717	0.609908	0.701069	1.18388	0.993587	1.09762	1.21364	1.366	0.94392	1.18971	0.997279		0.748108	0.99954	0.839262	0.691013	0.81939	1.14947	1.10571	0.838255
365	P48444	ARCN1	Coatomer subunit delta OS=Homo sapiens OX=9606 GN=ARCN1 PE=1 SV=1			9	240.488	200.715	296.915	257.375	800.803	793.181	632.55	609.029	769.662	673.157	752.782	784.898	982.19	705.841	972.179	861.63		0.344398	0.28744	0.425206	0.368581	1.14681	1.1359	0.905861	0.872177	1.10222	0.964014	1.07804	1.12404	1.40657	1.01082	1.39224	1.23392		0.834615	0.990482	0.874614	0.71864	0.866831	0.962816	1.04266	0.886287
366	O15033	AREL1	Apoptosis-resistant E3 ubiquitin protein ligase 1 OS=Homo sapiens OX=9606 GN=AREL1 PE=1 SV=3			3	105.174	65.8878	124.35	98.0316	277.081	297.147	256.808	204.847	270.863	216.129	226.935	315.356	368.308	253.737	277.714	311.209		0.411871	0.258023	0.486966	0.383901	1.08508	1.16366	1.00568	0.8022	1.06072	0.846381	0.888699	1.23496	1.44233	0.993658	1.08755	1.21872		0.626465	1.07242	0.797927	0.688926	0.788352	0.797666	1.38963	1.12061
367	P84085	ARF5	ADP-ribosylation factor 5 OS=Homo sapiens OX=9606 GN=ARF5 PE=1 SV=2			3	200.887	154.65	394.34	264.79	342.229	485.933	509.455	331.408	616.346	375.754	514.375	897.673	528.765	397.139	473.424	520.664		0.475972	0.36642	0.934329	0.62738	0.81086	1.15135	1.20708	0.785221	1.46034	0.890293	1.21873	2.1269	1.25283	0.940961	1.12171	1.23364		0.769836	1.41991	0.609648	0.751069	0.671476	0.650515	1.74517	1.09978
368	Q8N6T3	ARFGAP1	ADP-ribosylation factor GTPase-activating protein 1 OS=Homo sapiens OX=9606 GN=ARFGAP1 PE=1 SV=2			1	6.53299	10.4126	13.5294	18.375	28.2607	26.2554	25.1022	21.0338	51.3415	27.6637	33.5665	42.4698	44.0533	32.8992	37.7092	30.2941		0.200724	0.319924	0.415687	0.564566	0.868301	0.806689	0.771257	0.646257	1.57745	0.849958	1.03132	1.30487	1.35352	1.01082	1.1586	0.930777		1.59385	0.929043	0.538818	0.746804	1.35815	0.837927	1.26524	0.803361
369	Q8N6H7	ARFGAP2	ADP-ribosylation factor GTPase-activating protein 2 OS=Homo sapiens OX=9606 GN=ARFGAP2 PE=1 SV=1			4	66.9888	56.6758	82.4103	83.8589	257.881	279.013	189.311	213.319	310.662	252.543	296.27	307.208	308.086	246.922	344.635	292.789		0.283966	0.240249	0.349338	0.355478	1.09316	1.18274	0.80249	0.90426	1.3169	1.07053	1.25589	1.30226	1.30598	1.0467	1.46091	1.24113		0.846049	1.08194	0.812919	0.801471	1.01758	1.12682	1.03692	0.849563
370	Q9NP61	ARFGAP3	ADP-ribosylation factor GTPase-activating protein 3 OS=Homo sapiens OX=9606 GN=ARFGAP3 PE=1 SV=1			7	145.376	125.001	212.872	180.445	617.031	647.085	560.051	516.199	920.64	706.31	792.157	836.098	733.746	578.268	834.942	666.032		0.24061	0.206887	0.352321	0.298652	1.02124	1.07098	0.926933	0.854354	1.52374	1.169	1.31109	1.38381	1.21441	0.957083	1.3819	1.10234		0.859846	1.04871	0.767195	0.788104	0.847669	0.9217	1.05547	0.797699
371	Q9Y6D6	ARFGEF1	Brefeldin A-inhibited guanine nucleotide-exchange protein 1 OS=Homo sapiens OX=9606 GN=ARFGEF1 PE=1 SV=2			13	529.201	443.771	707.221	619.341	2403.09	2274.57	1920.25	2107.58	2522.37	2232.39	2594.2	2832.57	2122.99	1757.16	2758.12	2316.4		0.279348	0.234253	0.373319	0.32693	1.26851	1.20067	1.01364	1.11252	1.33148	1.17841	1.3694	1.49522	1.12066	0.927549	1.45592	1.22275		0.838568	0.946519	0.885037	0.827682	0.875739	1.09756	1.09189	0.839847
372	Q9Y6D5	ARFGEF2	Brefeldin A-inhibited guanine nucleotide-exchange protein 2 OS=Homo sapiens OX=9606 GN=ARFGEF2 PE=1 SV=3			6	196.811	179.331	271.391	245.266	821.774	856.556	686.489	768.136	1016.13	817.203	984.648	1043.2	769.573	648.176	993.443	799.478		0.280729	0.255795	0.387109	0.349844	1.17217	1.22178	0.979199	1.09566	1.44939	1.16565	1.40449	1.48801	1.09771	0.92455	1.41703	1.14037		0.911184	1.04233	0.804231	0.842254	0.903737	1.11893	1.05946	0.804755
373	Q5TH69	ARFGEF3	Brefeldin A-inhibited guanine nucleotide-exchange protein 3 OS=Homo sapiens OX=9606 GN=ARFGEF3 PE=1 SV=3			7	277.366	202.657	331.496	278.082	1013.28	1041.33	904.5	897.001	1242.85	1046.82	1235.79	1401.38	1042.76	759.271	1317.87	1139.23		0.310231	0.226669	0.370774	0.311031	1.13334	1.16472	1.01167	1.00328	1.39011	1.17086	1.38222	1.56743	1.16631	0.849236	1.47402	1.27422		0.730648	1.02768	0.842274	0.728136	0.83887	0.991709	1.134	0.864448
374	P53365	ARFIP2	Arfaptin-2 OS=Homo sapiens OX=9606 GN=ARFIP2 PE=1 SV=1			2	42.9888	33.7749	68.5014	66.4618	89.9069	118.73	122.503	98.2679	163.781	106.036	133.95	197.84	139.189	127.914	141.055	125.634		0.394514	0.309957	0.628647	0.609929	0.825088	1.0896	1.12423	0.901818	1.50304	0.973107	1.22928	1.81561	1.27736	1.17388	1.29448	1.15296		0.785667	1.32059	0.647426	0.918995	0.970225	0.802167	1.47697	0.890674
375	Q13795	ARFRP1	ADP-ribosylation factor-related protein 1 OS=Homo sapiens OX=9606 GN=ARFRP1 PE=1 SV=1			1	47.5989	22.9801	137.721	124.997	99.9832	167.684	265.215	175.103	464.19	189.534	332.419	897.896	331.561	217.549	351.878	396.834		0.201833	0.0974421	0.583976	0.530023	0.423957	0.711028	1.12459	0.742486	1.9683	0.803678	1.40955	3.80733	1.40591	0.922469	1.49206	1.68269		0.482786	1.67712	0.408311	0.656136	0.90761	0.66023	2.7011	1.12776
376	Q9NWB6	ARGLU1	Arginine and glutamate-rich protein 1 OS=Homo sapiens OX=9606 GN=ARGLU1 PE=1 SV=1			1	34.3267	85.7479	95.7467	55.1439	76.7358	127.621	87.2528	104.189	55.3459	104.194	124.279	116.927	79.2684	55.3056	152.237	106.141		0.558892	1.39611	1.55891	0.897828	1.24938	2.07787	1.42061	1.69636	0.901117	1.69644	2.02346	1.90375	1.29061	0.900461	2.47865	1.72814		2.49799	1.66312	1.8826	0.6977	0.575935	1.1941	0.940843	0.697209
377	A1A4S6	ARHGAP10	Rho GTPase-activating protein 10 OS=Homo sapiens OX=9606 GN=ARHGAP10 PE=1 SV=1			4	113.976	132.112	214.423	146.518	346.055	618.585	333.718	358.858	860.209	1065.06	484.322	848.124	555.535	613.057	617.301	730.518		0.243048	0.281722	0.457247	0.312443	0.737946	1.3191	0.711638	0.765247	1.83435	2.27119	1.03279	1.80858	1.18465	1.30731	1.31636	1.55779		1.15912	1.78753	1.23814	1.10354	0.683313	1.07533	1.75116	1.18341
378	Q8IWW6	ARHGAP12	Rho GTPase-activating protein 12 OS=Homo sapiens OX=9606 GN=ARHGAP12 PE=1 SV=1			2	19.5851	20.3226	20.3167	15.785	64.6692	78.0395	45.2656	41.2612	54.8835	58.6896	52.8226	65.0021	73.9017	71.2878	62.0228	63.1096		0.367727	0.381574	0.381464	0.296377	1.21422	1.46526	0.849901	0.774715	1.03048	1.10195	0.99179	1.22047	1.38757	1.33849	1.16453	1.18494		1.03766	1.20675	1.06935	0.96463	0.776947	0.911535	1.23057	1.01752
379	Q68EM7	ARHGAP17	Rho GTPase-activating protein 17 OS=Homo sapiens OX=9606 GN=ARHGAP17 PE=1 SV=1			5	179.34	158.408	206.327	182.923	568.009	671.933	488.949	438.702	772.042	629.356	634.281	747.73	730.19	556.263	657.479	601.007		0.318886	0.281667	0.366872	0.325257	1.00998	1.19477	0.869405	0.78006	1.37277	1.11906	1.12782	1.32955	1.29836	0.989096	1.16907	1.06866		0.883283	1.18296	0.815184	0.761806	0.886568	0.897235	1.17886	0.914108
380	Q14CB8	ARHGAP19	Rho GTPase-activating protein 19 OS=Homo sapiens OX=9606 GN=ARHGAP19 PE=1 SV=1			3	528.188	603.41	525.682	651.004	1225.36	1441.89	840.182	831.666	1591.58	1168.26	744.084	945.267	1322.08	1156.87	1088.21	916.135		0.45268	0.517149	0.450532	0.557939	1.05019	1.23576	0.720072	0.712774	1.36405	1.00125	0.637712	0.810135	1.13308	0.991488	0.932643	0.785167		1.14242	1.17671	0.734025	0.875038	1.2384	0.989864	1.27038	0.841873
381	Q5T5U3	ARHGAP21	Rho GTPase-activating protein 21 OS=Homo sapiens OX=9606 GN=ARHGAP21 PE=1 SV=1			2	13.8167	17.6546	14.9935	15.1511	54.2155	71.4624	39.186	28.6416	78.183	72.4373	42.9445	75.2844	62.7266	59.0029	47.3102	48.9421		0.264508	0.337981	0.287037	0.290054	1.03791	1.36808	0.75018	0.548317	1.49674	1.38675	0.822133	1.44125	1.20084	1.12956	0.905711	0.936952		1.27777	1.31812	0.92651	0.940636	1.01051	0.730914	1.75306	1.03449
382	Q7Z5H3	ARHGAP22	Rho GTPase-activating protein 22 OS=Homo sapiens OX=9606 GN=ARHGAP22 PE=1 SV=1			6	97.8953	90.0241	220.891	202.155	358.949	571.852	322.852	305.43	579.69	530.989	367.85	537.872	483.459	480.182	395.305	420.995		0.25762	0.236907	0.581295	0.531989	0.944607	1.50488	0.849614	0.803767	1.52551	1.39735	0.968031	1.41546	1.27227	1.26364	1.04028	1.10789		0.919596	1.59313	0.915988	0.993222	0.91518	0.946037	1.4622	1.06499
383	Q9UNA1	ARHGAP26	Rho GTPase-activating protein 26 OS=Homo sapiens OX=9606 GN=ARHGAP26 PE=1 SV=1			3	140.126	113.496	165.387	142.797	523.79	527.842	397.24	418.491	592.775	503.097	534.935	548.986	610.054	514.161	725.387	553.56		0.300257	0.243196	0.354386	0.305981	1.12236	1.13104	0.851193	0.896729	1.27018	1.07802	1.14624	1.17635	1.3072	1.10173	1.55434	1.18615		0.809957	1.00774	0.848715	0.842812	0.863411	1.0535	1.02627	0.763124
384	Q6ZUM4	ARHGAP27	Rho GTPase-activating protein 27 OS=Homo sapiens OX=9606 GN=ARHGAP27 PE=1 SV=3			1	5.98987	7.60701	8.95935	7.41154	30.579	33.4698	26.3511	30.7581	34.5976	30.5737	35.6605	37.2635	39.6834	29.6951	49.8637	43.1719		0.216144	0.274498	0.323297	0.267444	1.10344	1.20775	0.950875	1.1099	1.24845	1.10325	1.2868	1.34465	1.43197	1.07154	1.79932	1.55785		1.26998	1.09454	0.883694	0.7483	0.827241	1.16724	1.04495	0.865798
385	Q52LW3	ARHGAP29	Rho GTPase-activating protein 29 OS=Homo sapiens OX=9606 GN=ARHGAP29 PE=1 SV=2			1	50.3542	36.4904	71.0814	69.703	128.483	133.071	111.767	95.7825	171.503	112.282	143.884	136.451	227.243	155.418	165.259	128.468		0.348723	0.252711	0.492268	0.482722	0.889797	0.921571	0.774032	0.663333	1.18773	0.777599	0.996456	0.944979	1.57375	1.07633	1.14449	0.889693		0.724674	1.03571	0.654694	0.683929	0.980608	0.856984	0.94834	0.777374
386	Q2M1Z3	ARHGAP31	Rho GTPase-activating protein 31 OS=Homo sapiens OX=9606 GN=ARHGAP31 PE=1 SV=2			1	3.02731	0	4.89439	0	11.7935	14.8378	9.80974	11.9003	10.9357	6.74198	18.4797	14.6677	12.1608	13.2427	18.8337	11.7047		0.319359	0	0.516322	0	1.24413	1.56528	1.03486	1.25539	1.15364	0.71123	1.94947	1.54734	1.28288	1.39701	1.98682	1.23476		0	1.25813	0.616511	1.08897	0	1.21311	0.79372	0.621476
387	A7KAX9	ARHGAP32	Rho GTPase-activating protein 32 OS=Homo sapiens OX=9606 GN=ARHGAP32 PE=1 SV=1			5	301.548	267.798	480.14	477.939	830.241	955.111	786.989	901.294	853.694	874.407	986.647	1167.32	977.752	822.421	1277.25	1188.21		0.407052	0.361494	0.648129	0.645158	1.12072	1.28928	1.06234	1.21664	1.15238	1.18034	1.33185	1.57574	1.31984	1.11017	1.72413	1.60394		0.888078	1.1504	1.02426	0.841135	0.995416	1.14524	1.18312	0.930288
388	O14559	ARHGAP33	Rho GTPase-activating protein 33 OS=Homo sapiens OX=9606 GN=ARHGAP33 PE=1 SV=2			3	153.404	124.361	352.989	290.053	477.068	494.586	725.08	742.794	442.607	432.491	931.455	935.677	625.038	491.82	1166.74	946.225		0.361351	0.292939	0.831483	0.683234	1.12376	1.16502	1.70796	1.74969	1.04258	1.01875	2.19409	2.20403	1.47231	1.15851	2.74831	2.22888		0.810676	1.03672	0.977145	0.786864	0.821705	1.02443	1.00453	0.810999
389	Q9NRY4	ARHGAP35	Rho GTPase-activating protein 35 OS=Homo sapiens OX=9606 GN=ARHGAP35 PE=1 SV=3			9	497.103	370.518	573.793	488.819	1836.53	1980.21	1513.86	1528.87	2193.42	1995.58	1871.64	2370.88	2068.49	1488.22	2146.68	2096.51		0.301478	0.224708	0.347988	0.296454	1.1138	1.20094	0.918111	0.927214	1.33024	1.21026	1.13509	1.43787	1.25448	0.902561	1.3019	1.27147		0.745355	1.07823	0.909803	0.719472	0.851908	1.00992	1.26674	0.976629
390	Q9C0H5	ARHGAP39	Rho GTPase-activating protein 39 OS=Homo sapiens OX=9606 GN=ARHGAP39 PE=1 SV=2			4	42.9454	47.1706	70.721	56.1726	102.262	123.024	99.7868	103.914	126.635	125.977	164.646	136.753	149.454	118.85	193.133	134		0.407745	0.447861	0.671461	0.533331	0.970927	1.16805	0.947426	0.986612	1.20234	1.19609	1.56323	1.2984	1.41899	1.12842	1.8337	1.27226		1.09839	1.20303	0.994804	0.795228	0.794285	1.04136	0.830588	0.693822
391	A6NI28	ARHGAP42	Rho GTPase-activating protein 42 OS=Homo sapiens OX=9606 GN=ARHGAP42 PE=1 SV=3			1	25.7534	20.238	34.4861	31.7707	63.9557	59.7782	65.6183	65.3978	72.8184	52.9703	91.3432	98.6014	77.1439	62.7417	101.936	85.194		0.429812	0.337762	0.575556	0.530238	1.06739	0.997669	1.09514	1.09146	1.2153	0.884049	1.52447	1.64561	1.28749	1.04713	1.70126	1.42185		0.785838	0.934681	0.72743	0.813307	0.921261	0.99664	1.07946	0.83576
392	Q17R89	ARHGAP44	Rho GTPase-activating protein 44 OS=Homo sapiens OX=9606 GN=ARHGAP44 PE=1 SV=1			1	6.45637	6.53681	7.16174	5.57778	21.572	24.2348	23.7226	14.427	27.5898	25.5502	29.8642	31.1373	26.4714	19.911	31.7507	24.4521		0.314601	0.318521	0.348972	0.27179	1.05114	1.1809	1.15594	0.702988	1.34438	1.24499	1.4552	1.51724	1.28988	0.970209	1.54712	1.19148		1.01246	1.12344	0.926074	0.75217	0.77883	0.608154	1.04263	0.770128
393	Q13017	ARHGAP5	Rho GTPase-activating protein 5 OS=Homo sapiens OX=9606 GN=ARHGAP5 PE=1 SV=2			1	4.89682	3.74332	8.61998	8.16381	20.0427	22.9754	17.8453	13.9649	23.7494	25.457	20.1848	28.5664	23.9582	22.4252	17.9564	19.5534		0.269622	0.20611	0.474622	0.449505	1.10356	1.26504	0.982574	0.768917	1.30766	1.40168	1.11139	1.57289	1.31915	1.23475	0.988692	1.07662		0.764439	1.14632	1.0719	0.936014	0.94708	0.782553	1.41524	1.08894
394	P52565	ARHGDIA	Rho GDP-dissociation inhibitor 1 OS=Homo sapiens OX=9606 GN=ARHGDIA PE=1 SV=3			2	397.789	381.35	569.009	427.846	558.249	799.367	837.927	586.27	1145.9	806.061	942.09	1838.05	727.573	659.485	505.588	761.625		0.562343	0.539104	0.804392	0.604834	0.789181	1.13004	1.18455	0.828793	1.61993	1.13951	1.33181	2.5984	1.02855	0.932295	0.714736	1.07669		0.958674	1.43192	0.70343	0.906418	0.751914	0.699667	1.95103	1.50641
395	Q92888	ARHGEF1	Rho guanine nucleotide exchange factor 1 OS=Homo sapiens OX=9606 GN=ARHGEF1 PE=1 SV=2			14	353.48	331.654	685.321	622.917	1891.09	1967.16	1856.08	2022.95	2199.57	1853	2503.71	2869.77	1920.78	1758.99	3694.05	2589.58		0.222143	0.208426	0.430686	0.391469	1.18845	1.23625	1.16644	1.27131	1.38231	1.16451	1.57344	1.80349	1.2071	1.10543	2.32151	1.62741		0.938254	1.04023	0.842437	0.915769	0.908942	1.0899	1.14621	0.701014
396	O15013	ARHGEF10	Rho guanine nucleotide exchange factor 10 OS=Homo sapiens OX=9606 GN=ARHGEF10 PE=1 SV=4			1	9.19194	7.78908	10.5036	6.07878	20.6057	27.1962	20.6245	16.8823	19.9086	26.5767	29.4243	37.603	26.6023	20.5263	23.9261	26.4778		0.48183	0.408294	0.550586	0.318642	1.08013	1.42559	1.08111	0.884949	1.04358	1.39312	1.54239	1.9711	1.39446	1.07596	1.25418	1.38793		0.847382	1.31984	1.33494	0.771599	0.578733	0.818556	1.27796	1.10665
397	O15085	ARHGEF11	Rho guanine nucleotide exchange factor 11 OS=Homo sapiens OX=9606 GN=ARHGEF11 PE=1 SV=1			1	6.95814	7.43851	7.35252	9.39111	26.9397	29.3591	23.0291	23.9421	33.2915	37.5997	40.7338	41.7547	24.2535	28.3625	44.7383	33.8942		0.304371	0.325384	0.321623	0.410797	1.17843	1.28426	1.00737	1.0473	1.45628	1.64473	1.78183	1.82648	1.06093	1.24067	1.957	1.48264		1.06904	1.08981	1.12941	1.16942	1.27726	1.03965	1.02506	0.75761
398	Q9NZN5	ARHGEF12	Rho guanine nucleotide exchange factor 12 OS=Homo sapiens OX=9606 GN=ARHGEF12 PE=1 SV=1			11	761.432	650.339	816.289	745.041	2851.11	2991.59	2066.58	2235.22	2832.96	2886.54	2728.92	3041.99	3082.29	2650.51	3401.97	2923.16		0.319668	0.273028	0.342698	0.312786	1.19697	1.25594	0.867601	0.9384	1.18935	1.21184	1.14567	1.2771	1.29402	1.11275	1.42823	1.22721		0.8541	1.04927	1.01891	0.859916	0.912717	1.0816	1.11472	0.859255
399	Q5VV41	ARHGEF16	Rho guanine nucleotide exchange factor 16 OS=Homo sapiens OX=9606 GN=ARHGEF16 PE=1 SV=1			4	133.495	106.293	133.455	107.735	619.188	609.127	373.086	383.963	891.973	633.904	531.231	596.932	881.763	674.619	639.321	521.862		0.211358	0.16829	0.211295	0.170573	0.980341	0.964412	0.590695	0.607917	1.41223	1.00364	0.841081	0.945104	1.39607	1.0681	1.01222	0.826248		0.796232	0.983751	0.710676	0.76508	0.807276	1.02915	1.12368	0.816275
400	Q96PE2	ARHGEF17	Rho guanine nucleotide exchange factor 17 OS=Homo sapiens OX=9606 GN=ARHGEF17 PE=1 SV=1			3	56.8562	73.4077	79.3332	67.8772	270.556	312.346	163.865	193.972	380.828	410.432	282.135	294.591	278.457	256.99	291.9	233.674		0.230491	0.29759	0.321611	0.275169	1.09681	1.26623	0.664297	0.786349	1.54385	1.66386	1.14376	1.19425	1.12884	1.04182	1.18334	0.947298		1.29111	1.15446	1.07774	0.922907	0.855596	1.18373	1.04415	0.800528
401	Q6ZSZ5	ARHGEF18	Rho guanine nucleotide exchange factor 18 OS=Homo sapiens OX=9606 GN=ARHGEF18 PE=1 SV=4			3	233.818	221.403	305.562	294.258	818.751	881.775	690.428	658.547	905.19	763.896	790.091	1018.77	873.731	732.85	857.101	849.606		0.330311	0.312772	0.431662	0.415694	1.15664	1.24567	0.975356	0.930319	1.27875	1.07914	1.11615	1.4392	1.23431	1.03529	1.21081	1.20022		0.946903	1.07698	0.843907	0.838759	0.963006	0.953824	1.28943	0.991255
402	Q92974	ARHGEF2	Rho guanine nucleotide exchange factor 2 OS=Homo sapiens OX=9606 GN=ARHGEF2 PE=1 SV=4			14	650.809	686.768	698.03	634.692	1226.86	1621.39	1092.1	1085.08	1549.63	1399.43	1201.97	1341.5	1668.82	1335.2	1552.55	1350.1		0.510827	0.539052	0.547891	0.498177	0.962976	1.27265	0.857201	0.851691	1.21632	1.09843	0.94344	1.05296	1.30988	1.04801	1.21861	1.05971		1.05525	1.32158	0.903074	0.800086	0.909262	0.993572	1.11608	0.869602
403	Q96DR7	ARHGEF26	Rho guanine nucleotide exchange factor 26 OS=Homo sapiens OX=9606 GN=ARHGEF26 PE=1 SV=4			5	70.4409	49.0301	88.8349	95.0646	228.02	274.793	204.467	188.813	275.936	245.78	251.119	306.707	305.941	229.287	284.642	289.781		0.320063	0.222779	0.40364	0.431946	1.03606	1.24858	0.929039	0.857911	1.25377	1.11675	1.14101	1.39359	1.39011	1.04181	1.29333	1.31668		0.696046	1.20513	0.890714	0.749448	1.07013	0.92344	1.22136	1.01805
404	Q8N1W1	ARHGEF28	Rho guanine nucleotide exchange factor 28 OS=Homo sapiens OX=9606 GN=ARHGEF28 PE=1 SV=3			3	72.732	55.9337	100.508	75.6013	272.785	286.366	189.007	194.841	306.198	249.597	236.422	286.3	275.906	197.098	255.176	235.163		0.313628	0.241192	0.433401	0.326001	1.17628	1.23484	0.815018	0.840175	1.32036	1.07629	1.01948	1.23456	1.18974	0.849907	1.10035	1.01405		0.769038	1.04979	0.815149	0.714366	0.752192	1.03087	1.21097	0.921572
405	Q9NR81	ARHGEF3	Rho guanine nucleotide exchange factor 3 OS=Homo sapiens OX=9606 GN=ARHGEF3 PE=1 SV=1			2	25.0667	20.2112	24.7249	15.9597	84.837	86.1239	60.3807	51.5049	101.984	83.364	72.9552	81.447	90.3814	69.9702	68.3406	70.8175		0.331714	0.26746	0.327191	0.211199	1.12267	1.1397	0.799032	0.681577	1.34958	1.10318	0.965434	1.07781	1.19604	0.925933	0.904368	0.937145		0.806297	1.01517	0.817422	0.774166	0.645491	0.853003	1.1164	1.03624
406	Q8TER5	ARHGEF40	Rho guanine nucleotide exchange factor 40 OS=Homo sapiens OX=9606 GN=ARHGEF40 PE=1 SV=3			4	224.824	208.741	293.798	270.464	633.428	789.925	636.416	707.745	1105.41	1089.47	806.488	1094.33	718.844	608.563	901.742	976.595		0.335245	0.311263	0.438095	0.4033	0.944532	1.17789	0.948987	1.05535	1.64832	1.62456	1.20259	1.6318	1.0719	0.907454	1.34463	1.45624		0.928464	1.24706	0.98558	0.846586	0.920578	1.11208	1.35691	1.08301
407	Q12774	ARHGEF5	Rho guanine nucleotide exchange factor 5 OS=Homo sapiens OX=9606 GN=ARHGEF5 PE=1 SV=3			6	64.6852	53.3505	86.1187	92.2955	202.008	224.724	221.75	225.803	276.638	209.873	281.06	338.166	296.686	239.409	353.688	309.798		0.308018	0.254045	0.410081	0.439493	0.961923	1.07009	1.05593	1.07523	1.3173	0.999375	1.33835	1.61028	1.41276	1.14002	1.68419	1.4752		0.824771	1.11245	0.758656	0.806944	1.07172	1.01828	1.20318	0.875908
408	Q15052	ARHGEF6	Rho guanine nucleotide exchange factor 6 OS=Homo sapiens OX=9606 GN=ARHGEF6 PE=1 SV=2			4	51.1257	37.4669	58.4089	69.3386	194.369	191.872	210.934	219.53	247.181	237.196	239.881	259.451	152.745	110.523	246.395	237.606		0.316852	0.232201	0.36199	0.429727	1.2046	1.18913	1.30727	1.36054	1.53191	1.47002	1.48666	1.60795	0.946638	0.684967	1.52704	1.47257		0.732839	0.987153	0.959605	0.723579	1.18712	1.04075	1.08158	0.96433
409	Q14155	ARHGEF7	Rho guanine nucleotide exchange factor 7 OS=Homo sapiens OX=9606 GN=ARHGEF7 PE=1 SV=2			5	154.37	127.601	255.16	234.249	515.804	579.145	583.479	669.167	576.291	527.198	706.063	798.369	543.475	450.004	870.355	762.136		0.344972	0.285151	0.570209	0.523479	1.15267	1.29422	1.30391	1.4954	1.28784	1.17814	1.57785	1.78412	1.21451	1.00563	1.94499	1.70315		0.826592	1.1228	0.914812	0.828012	0.918047	1.14686	1.13073	0.875661
410	O14497	ARID1A	AT-rich interactive domain-containing protein 1A OS=Homo sapiens OX=9606 GN=ARID1A PE=1 SV=3			16	565.52	567.026	600.55	462.304	2206.33	2601.62	1329.07	1509.2	2855.59	2480.22	1941.81	2168.65	2588.51	2332.66	2518.51	1984.47		0.275328	0.276061	0.292382	0.225076	1.07417	1.26662	0.647068	0.734766	1.39027	1.20751	0.945386	1.05582	1.26024	1.13567	1.22616	0.966155		1.00266	1.17916	0.868549	0.901159	0.769801	1.13553	1.11682	0.787954
411	Q8NFD5	ARID1B	AT-rich interactive domain-containing protein 1B OS=Homo sapiens OX=9606 GN=ARID1B PE=1 SV=2			4	179.808	184.455	290.883	225.908	702.005	744.573	645.111	718.436	853.731	677.723	864.889	955.349	808.203	624.084	1062.22	881.179		0.282745	0.290052	0.457409	0.355237	1.10389	1.17083	1.01443	1.12973	1.34248	1.06571	1.36002	1.50227	1.27089	0.981362	1.67032	1.38564		1.02584	1.06064	0.793837	0.772187	0.776628	1.11366	1.10459	0.829564
412	Q68CP9	ARID2	AT-rich interactive domain-containing protein 2 OS=Homo sapiens OX=9606 GN=ARID2 PE=1 SV=2			12	948.995	614.938	1351.57	955.189	2009.77	1645.17	1975.48	1385.04	1886.78	1123.56	2049.43	1966.84	3557.33	1922.86	3090.45	2368.17		0.451748	0.292727	0.643385	0.454696	0.956706	0.783146	0.940383	0.659317	0.898159	0.534846	0.975585	0.93627	1.69339	0.915334	1.47114	1.12731		0.647989	0.818586	0.595491	0.540535	0.706726	0.701116	0.959701	0.766286
413	P29374	ARID4A	AT-rich interactive domain-containing protein 4A OS=Homo sapiens OX=9606 GN=ARID4A PE=1 SV=3			2	81.8996	65.1695	158.093	126.584	252.067	275.793	317.345	275.065	314.694	245.892	392.805	422.51	324.592	239.482	413.824	379.627		0.336602	0.267842	0.649751	0.520251	1.03598	1.13349	1.30427	1.1305	1.29337	1.0106	1.6144	1.73649	1.33405	0.984254	1.70079	1.56024		0.795724	1.09413	0.781369	0.737794	0.800693	0.86677	1.07562	0.917363
414	Q4LE39	ARID4B	AT-rich interactive domain-containing protein 4B OS=Homo sapiens OX=9606 GN=ARID4B PE=1 SV=2			9	829.339	690.184	1119.07	886.79	2230.68	2368.06	2044.32	1804.88	2708.73	2085.84	2465.5	2536.74	3018.51	2201.29	2997.48	2426.46		0.377519	0.314175	0.509406	0.403671	1.01542	1.07795	0.930584	0.82159	1.23303	0.949484	1.12231	1.15474	1.37404	1.00204	1.36447	1.10454		0.83221	1.06159	0.770044	0.729264	0.792435	0.882875	1.02889	0.8095
415	Q14865	ARID5B	AT-rich interactive domain-containing protein 5B OS=Homo sapiens OX=9606 GN=ARID5B PE=1 SV=3			1	43.5676	47.2592	40.1567	45.2468	117.43	144.759	97.4988	73.4093	117.84	115.875	105.032	105.222	187.025	122.889	143.103	82.1252		0.374081	0.405778	0.344794	0.388499	1.00828	1.24293	0.837146	0.630309	1.0118	0.994929	0.901828	0.90346	1.60584	1.05515	1.22871	0.705145		1.08473	1.23273	0.983325	0.657073	1.12676	0.752925	1.00181	0.573889
416	Q9Y4X5	ARIH1	E3 ubiquitin-protein ligase ARIH1 OS=Homo sapiens OX=9606 GN=ARIH1 PE=1 SV=2			2	108.393	90.3226	140.108	133.592	380.38	392.501	349.45	361.374	373.604	352	383.782	416.093	428.494	374.972	519.998	473.559		0.335876	0.279881	0.43415	0.413959	1.17868	1.21624	1.08283	1.11978	1.15768	1.09074	1.18922	1.28934	1.32777	1.16192	1.61131	1.46741		0.833288	1.03187	0.942174	0.875093	0.953493	1.03412	1.08419	0.910694
417	O95376	ARIH2	E3 ubiquitin-protein ligase ARIH2 OS=Homo sapiens OX=9606 GN=ARIH2 PE=1 SV=1			3	251.429	156.471	235.93	209.91	1013.5	910.853	698.775	688.599	1362.73	1024.39	1059.54	1030.19	1076.35	853.354	1374.35	1067.01		0.271521	0.168975	0.254783	0.226684	1.09449	0.98364	0.754615	0.743626	1.47163	1.10625	1.14421	1.11251	1.16236	0.921546	1.48418	1.15228		0.622327	0.89872	0.751719	0.792822	0.889713	0.985437	0.972299	0.776374
418	P40616	ARL1	ADP-ribosylation factor-like protein 1 OS=Homo sapiens OX=9606 GN=ARL1 PE=1 SV=1			5	201.185	142.869	375.045	285.809	559.881	663.305	668.767	470.583	732.022	570.381	660.62	1066.09	796.193	571.214	598.301	760.071		0.351525	0.249631	0.655306	0.499386	0.978265	1.15898	1.16852	0.822237	1.27904	0.996612	1.15428	1.86275	1.39117	0.998067	1.0454	1.32805		0.710137	1.18472	0.779186	0.717432	0.762066	0.703658	1.61377	1.27038
419	Q8N8L6	ARL10	ADP-ribosylation factor-like protein 10 OS=Homo sapiens OX=9606 GN=ARL10 PE=2 SV=1			3	8.98096	2.06113	31.3557	41.4817	32.059	51.5645	132.684	76.3085	104.202	54.4766	203.27	360.144	57.1262	62.2072	242.267	179.15		0.177517	0.0407402	0.619775	0.819925	0.633677	1.01922	2.62263	1.50831	2.05965	1.07678	4.01783	7.11859	1.12915	1.22958	4.78864	3.54107		0.2295	1.60843	0.522798	1.08894	1.32294	0.575115	1.77175	0.739473
420	Q3SXY8	ARL13B	ADP-ribosylation factor-like protein 13B OS=Homo sapiens OX=9606 GN=ARL13B PE=1 SV=1			2	77.0668	46.709	200.328	227.764	243.571	288.081	289.141	217.255	623.057	416.541	357.696	688.417	507.351	401.373	430.563	517.369		0.212445	0.12876	0.552231	0.627862	0.671436	0.794133	0.797055	0.598892	1.71754	1.14825	0.986036	1.89771	1.39858	1.10644	1.1869	1.4262		0.606085	1.18274	0.668544	0.791115	1.13696	0.751381	1.92459	1.20161
421	Q8N8R7	ARL14EP	ARL14 effector protein OS=Homo sapiens OX=9606 GN=ARL14EP PE=1 SV=1			1	15.2165	13.0915	20.5629	17.2749	51.1954	46.7538	40.4282	44.2501	44.6072	32.21	43.9931	57.3628	56.795	43.9089	69.2043	59.3573		0.362699	0.312048	0.490135	0.411763	1.22029	1.11442	0.963643	1.05474	1.06325	0.767754	1.04862	1.36729	1.35376	1.04661	1.64955	1.41483		0.860349	0.913242	0.722081	0.773112	0.8401	1.09454	1.3039	0.857711
422	Q9NXU5	ARL15	ADP-ribosylation factor-like protein 15 OS=Homo sapiens OX=9606 GN=ARL15 PE=1 SV=1			1	10.6895	8.25592	20.473	32.443	26.9465	51.0237	45.937	26.1136	139.175	89.3011	78.7791	132.019	100.715	87.1458	104.228	86.5726		0.154068	0.118993	0.295079	0.467603	0.388382	0.735408	0.662093	0.376377	2.00594	1.2871	1.13545	1.9028	1.45161	1.25604	1.50224	1.24778		0.772339	1.89352	0.641646	0.865271	1.58467	0.568466	1.67581	0.830608
423	Q0P5N6	ARL16	ADP-ribosylation factor-like protein 16 OS=Homo sapiens OX=9606 GN=ARL16 PE=1 SV=1			1	3.15653	2.63769	2.44314	2.34183	9.50681	17.0535	14.2623	10.2621	27.1956	17.0632	22.3392	33.2789	15.0841	13.6491	31.3965	18.3119		0.229804	0.192031	0.177867	0.170491	0.692121	1.24154	1.03833	0.747108	1.97991	1.24225	1.62635	2.42279	1.09816	0.993691	2.28575	1.33316		0.83563	1.79382	0.627425	0.904867	0.958533	0.719526	1.48971	0.583247
424	P36404	ARL2	ADP-ribosylation factor-like protein 2 OS=Homo sapiens OX=9606 GN=ARL2 PE=1 SV=4			1	67.1017	51.77	83.2796	65.8879	238.13	291.654	187.887	210.375	467.486	344.405	251.411	398.763	255.194	219.693	333.534	286.546		0.261119	0.201457	0.324073	0.256395	0.926655	1.13494	0.731141	0.81865	1.81917	1.34021	0.978337	1.55174	0.993058	0.85491	1.29791	1.11506		0.771515	1.22477	0.736717	0.860886	0.791165	1.11969	1.5861	0.859121
425	Q66PJ3	ARL6IP4	ADP-ribosylation factor-like protein 6-interacting protein 4 OS=Homo sapiens OX=9606 GN=ARL6IP4 PE=1 SV=2			5	343.383	262.925	617.341	404.095	506.203	632.326	591.063	508.652	563.459	560.903	675.609	715.515	806.134	576.104	940.467	711.951		0.618937	0.473914	1.11274	0.728368	0.912415	1.13975	1.06537	0.916829	1.01562	1.01101	1.21776	1.28969	1.45303	1.03841	1.69516	1.28327		0.76569	1.24915	0.995464	0.71465	0.654573	0.860572	1.05907	0.757019
426	O75915	ARL6IP5	PRA1 family protein 3 OS=Homo sapiens OX=9606 GN=ARL6IP5 PE=1 SV=1			1	19.586	21.1596	19.9579	17.651	46.2403	70.7301	55.664	45.0613	177.796	95.3364	54.6862	156.946	62.6517	64.0797	63.1774	57.0782		0.255797	0.276349	0.260654	0.230526	0.603908	0.923749	0.726983	0.58851	2.32205	1.24511	0.714213	2.04975	0.818244	0.836894	0.82511	0.745453		1.08034	1.52962	0.536212	1.02279	0.884412	0.809523	2.86994	0.903459
427	Q8N6S5	ARL6IP6	ADP-ribosylation factor-like protein 6-interacting protein 6 OS=Homo sapiens OX=9606 GN=ARL6IP6 PE=1 SV=1			3	70.0592	48.2989	115.72	106.369	203.529	232.253	252.169	213.272	290.669	215.828	317.193	377.163	318.194	248.179	384.774	328.74		0.317566	0.218931	0.524539	0.482152	0.922562	1.05276	1.14304	0.966725	1.31755	0.978311	1.43778	1.70962	1.44232	1.12495	1.74411	1.49012		0.689401	1.14113	0.742522	0.779961	0.919193	0.84575	1.18906	0.854372
428	Q96BM9	ARL8A	ADP-ribosylation factor-like protein 8A OS=Homo sapiens OX=9606 GN=ARL8A PE=1 SV=1			1	2.00182	2.60056	5.57125	7.85675	8.78837	11.5741	17.6042	12.0463	29.1019	13.8293	23.5382	40.3031	18.3986	14.1216	26.9827	20.0112		0.137368	0.178455	0.382308	0.539143	0.603072	0.794233	1.20803	0.826636	1.99702	0.948989	1.61523	2.76566	1.26254	0.969047	1.8516	1.3732		1.2991	1.31698	0.475203	0.767537	1.41023	0.684286	1.71224	0.741631
429	Q9NVJ2	ARL8B	ADP-ribosylation factor-like protein 8B OS=Homo sapiens OX=9606 GN=ARL8B PE=1 SV=1			2	32.7972	24.0811	70.867	69.899	89.7793	132.492	209.384	119.409	353.328	181.005	245.699	477.789	266.688	186.497	242.692	280.164		0.176663	0.129714	0.381728	0.376513	0.483599	0.713673	1.12785	0.643201	1.90321	0.97499	1.32347	2.57363	1.43652	1.00457	1.30727	1.50911		0.734243	1.47575	0.512286	0.699308	0.986341	0.570287	1.94461	1.1544
430	Q9NVT9	ARMC1	Armadillo repeat-containing protein 1 OS=Homo sapiens OX=9606 GN=ARMC1 PE=1 SV=1			3	62.9114	44.2033	125.18	269.664	198.764	380.854	789.71	288.585	866.411	456.109	873.07	1394.44	830.102	769.24	815.743	799.851		0.128509	0.0902943	0.255706	0.550844	0.406016	0.777972	1.61314	0.589494	1.76982	0.931696	1.78342	2.84843	1.69565	1.57133	1.66632	1.63386		0.702628	1.91611	0.526435	0.926681	2.15421	0.365432	1.59717	0.980518
431	Q8N2F6	ARMC10	Armadillo repeat-containing protein 10 OS=Homo sapiens OX=9606 GN=ARMC10 PE=1 SV=1			3	20.3067	22.9885	63.6947	185.33	86.987	172.359	547.815	161.813	481.711	210.615	626.633	1144.41	492.131	449.856	570.822	562.947		0.075131	0.0850532	0.235658	0.685686	0.321836	0.637696	2.02681	0.598678	1.78224	0.779236	2.31842	4.2341	1.82079	1.66438	2.11193	2.0828		1.13206	1.98143	0.437223	0.914098	2.90966	0.295379	1.82628	0.986204
432	Q5T2S8	ARMC4	Armadillo repeat-containing protein 4 OS=Homo sapiens OX=9606 GN=ARMC4 PE=1 SV=1			1	24.034	19.3698	38.5591	25.1396	59.657	58.3426	49.8237	49.8981	56.8664	54.3744	64.1494	59.6603	73.8901	54.5068	72.5748	65.664		0.448296	0.361297	0.719227	0.468918	1.11276	1.08824	0.929341	0.930728	1.06071	1.01422	1.19655	1.11282	1.37824	1.01669	1.35371	1.2248		0.805933	0.977967	0.956178	0.737674	0.651976	1.00149	0.930021	0.904777
433	Q96C12	ARMC5	Armadillo repeat-containing protein 5 OS=Homo sapiens OX=9606 GN=ARMC5 PE=1 SV=2			2	22.0356	20.4248	38.4526	39.4702	68.4266	75.0775	67.8895	68.616	70.7865	59.3199	104.473	101.826	92.6133	71.9437	138.236	85.3364		0.347206	0.321825	0.605882	0.621916	1.07817	1.18297	1.06971	1.08115	1.11535	0.934679	1.64614	1.60443	1.45927	1.13359	2.17813	1.34461		0.9269	1.0972	0.838011	0.776818	1.02646	1.0107	0.974663	0.617324
434	Q6NXE6	ARMC6	Armadillo repeat-containing protein 6 OS=Homo sapiens OX=9606 GN=ARMC6 PE=1 SV=2			10	433.624	412.16	618.884	635.723	1937.44	2011.84	1662.95	1540.69	2210.59	2007.61	1818.14	2344.76	2114.21	2003.55	2815.28	2235.16		0.25904	0.246218	0.369711	0.379771	1.1574	1.20184	0.993419	0.920383	1.32057	1.19931	1.08613	1.40072	1.26299	1.19689	1.6818	1.33525		0.950501	1.0384	0.908178	0.947659	1.02721	0.92648	1.28965	0.793939
435	Q9H6L4	ARMC7	Armadillo repeat-containing protein 7 OS=Homo sapiens OX=9606 GN=ARMC7 PE=1 SV=1			1	17.3583	18.8838	31.0673	27.2736	68.4036	64.7266	51.1567	50.1969	74.1754	56.9589	67.164	86.1952	67.3858	69.757	87.9813	66.5259		0.305438	0.332281	0.546663	0.479909	1.20364	1.13894	0.900158	0.88327	1.3052	1.00225	1.18182	1.5167	1.18573	1.22745	1.54813	1.1706		1.08788	0.946246	0.767895	1.03519	0.877888	0.981238	1.28335	0.756137
436	Q8IUR7	ARMC8	Armadillo repeat-containing protein 8 OS=Homo sapiens OX=9606 GN=ARMC8 PE=1 SV=2			4	176.624	187.989	183.73	183.319	476.027	524.492	419.394	393.704	677.604	542.237	578.223	807.584	494.493	598.289	884.778	659.674		0.387175	0.412088	0.402752	0.401851	1.04349	1.14973	0.919347	0.863032	1.48536	1.18863	1.26751	1.77029	1.08397	1.3115	1.93951	1.44606		1.06435	1.10181	0.800227	1.2099	0.997763	0.938745	1.39667	0.745581
437	Q7Z3E5	ARMC9	LisH domain-containing protein ARMC9 OS=Homo sapiens OX=9606 GN=ARMC9 PE=1 SV=3			1	20.0512	19.506	30.1337	23.6834	57.8875	68.092	63.3653	53.4622	78.9079	62.6187	56.8441	93.5088	63.1203	57.3476	78.9013	77.5222		0.364622	0.354708	0.547968	0.430672	1.05266	1.23822	1.15227	0.972186	1.4349	1.13869	1.03368	1.70042	1.14781	1.04284	1.43478	1.40971		0.97281	1.17628	0.793567	0.908544	0.785944	0.843714	1.645	0.982521
438	Q7L311	ARMCX2	Armadillo repeat-containing X-linked protein 2 OS=Homo sapiens OX=9606 GN=ARMCX2 PE=2 SV=1			2	42.0332	67.5412	101.114	74.1874	141.276	178.728	183.531	189.663	218.565	171.795	578.675	340.67	250.071	225.166	927.052	229.33		0.257894	0.414398	0.620383	0.455176	0.866797	1.09658	1.12605	1.16367	1.341	1.05405	3.55045	2.09018	1.53431	1.3815	5.68791	1.40705		1.60685	1.2651	0.786013	0.900408	0.733701	1.03341	0.588707	0.247376
439	Q9UH62	ARMCX3	Armadillo repeat-containing X-linked protein 3 OS=Homo sapiens OX=9606 GN=ARMCX3 PE=1 SV=1			2	47.367	52.8789	92.6211	125.91	141.462	225.926	326.341	192.038	210.658	152.899	319.649	550.744	305.321	292.274	324.605	349.732		0.268822	0.300104	0.525653	0.714578	0.80284	1.2822	1.85208	1.08987	1.19555	0.867748	1.81411	3.12564	1.73279	1.65874	1.84223	1.98484		1.11637	1.59708	0.725816	0.957268	1.35941	0.588458	1.72296	1.07741
440	Q6P1M9	ARMCX5	Armadillo repeat-containing X-linked protein 5 OS=Homo sapiens OX=9606 GN=ARMCX5 PE=1 SV=1			1	24.4182	30.6856	32.7142	26.7938	46.793	61.7073	50.3592	37.754	62.5658	61.6591	52.9862	58.257	86.1478	58.7427	70.2843	53.0136		0.444119	0.558111	0.595007	0.487327	0.851073	1.12233	0.915935	0.686671	1.13795	1.12146	0.963715	1.05958	1.56686	1.06841	1.27833	0.964213		1.25667	1.31873	0.985508	0.681883	0.819027	0.749694	1.09947	0.754274
441	Q9H993	ARMT1	Protein-glutamate O-methyltransferase OS=Homo sapiens OX=9606 GN=ARMT1 PE=1 SV=1			1	3.66474	5.06621	12.8349	9.33172	10.3261	15.6277	17.4193	12.4742	22.3783	15.5772	14.6677	37.0706	18.1462	15.7289	12.4155	15.6832		0.268896	0.371727	0.941746	0.684704	0.757666	1.14666	1.27812	0.91528	1.64198	1.14296	1.07623	2.72001	1.33146	1.15409	0.910973	1.15074		1.38242	1.51342	0.696085	0.866788	0.727058	0.716114	2.52736	1.2632
442	P27540	ARNT	Aryl hydrocarbon receptor nuclear translocator OS=Homo sapiens OX=9606 GN=ARNT PE=1 SV=1			2	72.1169	54.4231	91.9322	74.1541	214.084	222.722	185.278	162.446	267.368	228.486	237.385	285.482	245.695	192.215	242.958	250.172		0.360917	0.272366	0.460084	0.371112	1.07141	1.11464	0.927243	0.812978	1.33807	1.14348	1.18802	1.42872	1.22961	0.96196	1.21591	1.25201		0.754651	1.04035	0.854575	0.782332	0.806617	0.876769	1.20261	1.02969
443	Q92747	ARPC1A	Actin-related protein 2/3 complex subunit 1A OS=Homo sapiens OX=9606 GN=ARPC1A PE=2 SV=2			1	24.5443	23.0056	23.3961	37.068	53.9721	86.3353	59.9959	57.0204	59.1736	76.8104	63.9396	107.075	56.7823	47.7128	47.1067	81.0667		0.504839	0.47319	0.481222	0.762432	1.11012	1.77579	1.23402	1.17282	1.21711	1.57987	1.31514	2.20237	1.16793	0.98138	0.968913	1.66742		0.937309	1.59963	1.29805	0.840276	1.58437	0.950405	1.67463	1.72092
444	O15143	ARPC1B	Actin-related protein 2/3 complex subunit 1B OS=Homo sapiens OX=9606 GN=ARPC1B PE=1 SV=3			2	222.321	191.511	226.431	211.48	506.222	668.008	402.997	371.88	637.509	714.095	427.826	569.93	553.14	460.305	460.521	519.983		0.463364	0.399149	0.47193	0.440769	1.05507	1.39227	0.839931	0.775076	1.3287	1.48832	0.891679	1.18785	1.15286	0.959372	0.959823	1.08375		0.861417	1.31959	1.12013	0.832167	0.933971	0.922786	1.33215	1.12912
445	O15144	ARPC2	Actin-related protein 2/3 complex subunit 2 OS=Homo sapiens OX=9606 GN=ARPC2 PE=1 SV=1			1	174.481	116.975	172.109	155.762	336.251	377.505	357	258.542	471.25	394.119	391.298	485.983	386.073	282.222	372.335	352.134		0.510158	0.342018	0.503222	0.455426	0.983151	1.10377	1.04382	0.75594	1.37787	1.15235	1.1441	1.42095	1.12882	0.825177	1.08866	1.02959		0.670417	1.12269	0.836327	0.731007	0.905019	0.724207	1.24198	0.945745
446	O15145	ARPC3	Actin-related protein 2/3 complex subunit 3 OS=Homo sapiens OX=9606 GN=ARPC3 PE=1 SV=3			3	99.5844	111.054	110.948	149.013	293.082	357.123	313.208	263.147	441.03	381.416	389.866	526.369	400.302	429.887	592.164	472.048		0.322802	0.359981	0.359637	0.483025	0.950024	1.15761	1.01526	0.85299	1.4296	1.23636	1.26375	1.70622	1.29758	1.39348	1.9195	1.53014		1.11517	1.21851	0.86483	1.07391	1.34309	0.840167	1.35013	0.797158
447	P59998	ARPC4	Actin-related protein 2/3 complex subunit 4 OS=Homo sapiens OX=9606 GN=ARPC4 PE=1 SV=3			1	4.70497	3.77001	4.46222	1.74018	9.27307	23.7403	6.85025	10.5734	18.0843	12.2463	13.1926	20.7789	9.31651	11.8719	14.7975	11.0161		0.454819	0.364438	0.431353	0.168219	0.896407	2.29492	0.662198	1.02211	1.74817	1.18382	1.2753	2.00865	0.900606	1.14763	1.43044	1.0649		0.801282	2.56013	0.677179	1.27429	0.389981	1.54351	1.57504	0.744457
448	O15511	ARPC5	Actin-related protein 2/3 complex subunit 5 OS=Homo sapiens OX=9606 GN=ARPC5 PE=1 SV=3			4	353.153	315.1	390.022	459.284	782.097	1132.55	839.008	766.598	1153.57	1149.43	1016.97	1378.36	901.225	835.591	935.675	1047.98		0.442819	0.395104	0.489049	0.575897	0.980672	1.42011	1.05203	0.961238	1.44646	1.44127	1.27518	1.72833	1.13005	1.04775	1.17324	1.31406		0.892248	1.44809	0.996411	0.927172	1.17758	0.913696	1.35536	1.12003
449	P49407	ARRB1	Beta-arrestin-1 OS=Homo sapiens OX=9606 GN=ARRB1 PE=1 SV=2			1	19.8262	13.2504	22.0298	24.4284	68.459	71.2245	61.8359	49.7987	76.8249	75.0296	66.433	87.4584	71.8926	58.463	57.9821	77.1823		0.334616	0.223633	0.371807	0.412289	1.15541	1.20209	1.04363	0.840475	1.29661	1.26631	1.12122	1.47607	1.21336	0.986706	0.97859	1.30264		0.668328	1.0404	0.976631	0.813199	1.10888	0.805336	1.31649	1.33114
450	P32121	ARRB2	Beta-arrestin-2 OS=Homo sapiens OX=9606 GN=ARRB2 PE=1 SV=2			4	67.2382	53.3528	94.8821	82.3541	175.018	218.567	148.59	178.687	238.539	236.548	254.609	252.925	231.756	199.432	374.677	246.647		0.37745	0.299503	0.532633	0.462306	0.982487	1.22695	0.83413	1.00308	1.33907	1.32789	1.42928	1.41983	1.30099	1.11954	2.1033	1.38459		0.793489	1.24883	0.991653	0.860526	0.867962	1.20255	0.993386	0.658292
451	Q8N5I2	ARRDC1	Arrestin domain-containing protein 1 OS=Homo sapiens OX=9606 GN=ARRDC1 PE=1 SV=1			1	68.3712	44.8828	59.7899	49.3247	185.969	176.208	109.512	97.3593	222.761	201.565	140.189	177.571	213.334	161.641	148.622	158.232		0.396105	0.260026	0.34639	0.28576	1.0774	1.02085	0.634452	0.564046	1.29055	1.16776	0.812178	1.02875	1.23594	0.936459	0.861034	0.916709		0.656458	0.947513	0.904849	0.75769	0.824967	0.889029	1.26665	1.06466
452	Q8NCT1	ARRDC4	Arrestin domain-containing protein 4 OS=Homo sapiens OX=9606 GN=ARRDC4 PE=1 SV=3			1	57.3023	38.2846	550.922	389.723	112.634	150.853	304.301	287.181	198.35	174.414	327.852	518.814	141.76	102.992	454.109	508.546		0.449389	0.300244	4.32056	3.05637	0.883324	1.18305	2.38646	2.2522	1.55555	1.36783	2.57115	4.06876	1.11174	0.807707	3.56132	3.98823		0.668116	1.33932	0.879324	0.726524	0.707401	0.94374	1.58246	1.11988
453	P15848	ARSB	Arylsulfatase B OS=Homo sapiens OX=9606 GN=ARSB PE=1 SV=1			1	5.39231	9.21205	21.201	16.408	15.818	32.0705	34.7162	26.4522	55.845	38.5882	44.537	101.494	37.2768	34.0394	56.4074	43.9847		0.188654	0.322291	0.741734	0.574047	0.553405	1.12201	1.21457	0.925451	1.95378	1.35004	1.55816	3.55085	1.30416	1.1909	1.97346	1.53884		1.70837	2.02747	0.690988	0.913152	0.773926	0.761956	2.27887	0.779768
454	O00192	ARVCF	Armadillo repeat protein deleted in velo-cardio-facial syndrome OS=Homo sapiens OX=9606 GN=ARVCF PE=1 SV=1			6	42.1637	39.8534	86.5422	117.754	156.972	190.143	212.802	183.61	261.853	198.78	286.21	383.336	246.681	212.021	324.92	293.332		0.238324	0.225266	0.489167	0.665587	0.887261	1.07476	1.20283	1.03783	1.48009	1.12358	1.61776	2.16675	1.39433	1.19842	1.83656	1.65802		0.945206	1.21132	0.759128	0.859495	1.36065	0.862821	1.33935	0.902782
455	Q13510	ASAH1	Acid ceramidase OS=Homo sapiens OX=9606 GN=ASAH1 PE=1 SV=5			2	329.804	318.967	599.97	550.287	796.415	1043.37	1077.33	849.086	1620.93	1117.15	1228.37	1792.08	1228.25	915.698	1287.43	1269.94		0.331845	0.320941	0.603683	0.553692	0.801343	1.04983	1.084	0.85434	1.63096	1.12406	1.23597	1.80317	1.23585	0.921365	1.2954	1.2778		0.967141	1.31008	0.689203	0.745531	0.917191	0.788139	1.45891	0.986415
456	Q9ULH1	ASAP1	Arf-GAP with SH3 domain, ANK repeat and PH domain-containing protein 1 OS=Homo sapiens OX=9606 GN=ASAP1 PE=1 SV=4			7	69.9389	78.4592	106.676	93.616	245.669	277.595	245.423	218.25	293.127	242.492	273.92	323.591	308.376	231.527	353.113	321.392		0.30504	0.342202	0.46527	0.408308	1.07149	1.21074	1.07042	0.951902	1.27848	1.05763	1.19471	1.41135	1.34499	1.00981	1.54011	1.40176		1.12182	1.12996	0.827259	0.750794	0.877573	0.889281	1.18133	0.910168
457	O43150	ASAP2	Arf-GAP with SH3 domain, ANK repeat and PH domain-containing protein 2 OS=Homo sapiens OX=9606 GN=ASAP2 PE=1 SV=3			1	14.5972	10.7835	17.4992	17.7448	25.2049	31.1035	36.888	34.3097	51.7967	42.3766	53.4703	70.8061	38.5761	35.1676	53.4167	49.5435		0.448541	0.331354	0.537713	0.54526	0.774493	0.955745	1.13349	1.05426	1.5916	1.30214	1.64303	2.17572	1.18536	1.08063	1.64138	1.52237		0.738738	1.23403	0.818133	0.911642	1.01403	0.930105	1.32421	0.927491
458	Q8TDY4	ASAP3	Arf-GAP with SH3 domain, ANK repeat and PH domain-containing protein 3 OS=Homo sapiens OX=9606 GN=ASAP3 PE=1 SV=1			1	2.60329	2.56342	4.81412	5.3445	15.0869	12.3462	9.21055	13.533	17.3911	15.3898	19.7248	17.9309	14.3697	14.4118	20.3037	16.822		0.210575	0.20735	0.389405	0.432307	1.22035	0.998662	0.745025	1.09466	1.40673	1.24485	1.5955	1.4504	1.16234	1.16574	1.64233	1.3607		0.984685	0.818339	0.884924	1.00293	1.11017	1.46929	0.909054	0.828519
459	Q9Y576	ASB1	Ankyrin repeat and SOCS box protein 1 OS=Homo sapiens OX=9606 GN=ASB1 PE=1 SV=1			1	8.19891	8.91878	14.5782	15.4373	25.4667	28.0526	25.6444	23.5263	29.4194	25.9094	27.474	34.0706	35.1438	27.3617	34.5746	35.1109		0.33387	0.363184	0.593643	0.628626	1.03704	1.14234	1.04427	0.95802	1.19799	1.05506	1.11878	1.3874	1.4311	1.1142	1.40792	1.42976		1.0878	1.10154	0.880691	0.778564	1.05893	0.917405	1.2401	1.01551
460	Q9Y575	ASB3	Ankyrin repeat and SOCS box protein 3 OS=Homo sapiens OX=9606 GN=ASB3 PE=1 SV=1			1	14.4535	19.4801	29.8256	17.8301	75.6797	73.1417	61.4801	61.4052	74.0309	61.327	68.617	71.839	70.7933	60.9408	85.0079	81.9941		0.246062	0.331636	0.507762	0.303546	1.2884	1.24519	1.04666	1.04538	1.26033	1.04405	1.16816	1.22301	1.20521	1.03748	1.44721	1.3959		1.34778	0.966464	0.828397	0.860827	0.597812	0.998782	1.04696	0.964547
461	Q9NWX5	ASB6	Ankyrin repeat and SOCS box protein 6 OS=Homo sapiens OX=9606 GN=ASB6 PE=1 SV=1			4	196.706	180.097	202.163	183.338	769.819	759.493	493.356	464.623	861.464	747.895	566.361	695.351	903.344	816.075	937.608	712.843		0.288073	0.26375	0.296065	0.268496	1.12739	1.11227	0.722513	0.680434	1.2616	1.09528	0.829428	1.01833	1.32293	1.19513	1.37311	1.04395		0.915564	0.986586	0.868167	0.903393	0.906882	0.94176	1.22775	0.760278
462	Q9H765	ASB8	Ankyrin repeat and SOCS box protein 8 OS=Homo sapiens OX=9606 GN=ASB8 PE=2 SV=1			1	11.4578	8.21911	14.3075	17.6943	32.4336	33.0363	29.9349	23.6227	41.3325	27.6043	42.5304	48.1999	33.2809	33.8631	72.1162	48.2155		0.386746	0.277427	0.482934	0.597252	1.09476	1.1151	1.01042	0.797358	1.39513	0.931753	1.43557	1.62693	1.12336	1.14301	2.4342	1.62746		0.717338	1.01858	0.667859	1.01749	1.23672	0.789136	1.1333	0.668581
463	Q8N9N2	ASCC1	Activating signal cointegrator 1 complex subunit 1 OS=Homo sapiens OX=9606 GN=ASCC1 PE=1 SV=1			1	189.737	212.443	214.476	188.135	318.456	517.201	304.806	317.278	410.266	408.97	335.271	439.709	379.815	347.36	384.021	392.833		0.584582	0.65454	0.660803	0.579647	0.981167	1.5935	0.939111	0.977538	1.26404	1.26004	1.03297	1.35475	1.17022	1.07022	1.18317	1.21032		1.11967	1.62409	0.996841	0.914551	0.877184	1.04092	1.3115	1.02295
464	Q9H1I8	ASCC2	Activating signal cointegrator 1 complex subunit 2 OS=Homo sapiens OX=9606 GN=ASCC2 PE=1 SV=3			6	299.421	291.203	444.29	423.261	612.394	846.715	718.237	638.242	883.466	800.421	808.591	965.683	893.913	713.874	967.394	934.622		0.445369	0.433145	0.660852	0.629573	0.910896	1.25943	1.06833	0.949343	1.3141	1.19057	1.20273	1.43639	1.32964	1.06184	1.43894	1.39019		0.972554	1.38263	0.906001	0.798594	0.952668	0.888623	1.19428	0.966123
465	Q8N3C0	ASCC3	Activating signal cointegrator 1 complex subunit 3 OS=Homo sapiens OX=9606 GN=ASCC3 PE=1 SV=3			22	1887.85	1713.76	2759.69	2439.93	3941.81	5278.02	4516.46	4241.23	4676.42	5042	4555.31	6137.89	5342.45	4079.96	5408.96	5866.18		0.476473	0.432535	0.696516	0.615812	0.994871	1.33212	1.13991	1.07044	1.18028	1.27255	1.14971	1.54914	1.34838	1.02974	1.36516	1.48056		0.907784	1.33898	1.07818	0.763687	0.884132	0.939061	1.34741	1.08453
466	L0R819	ASDURF	ASNSD1 upstream open reading frame protein OS=Homo sapiens OX=9606 GN=ASDURF PE=1 SV=1			2	126.417	123.947	99.6141	89.2023	291.126	315.961	226.742	168.203	924.814	559.165	431.961	578.058	287.634	354.635	610.797	353.062		0.310227	0.304166	0.244453	0.218903	0.714424	0.775369	0.556425	0.41277	2.26949	1.37219	1.06003	1.41856	0.705854	0.870275	1.4989	0.866415		0.980461	1.08531	0.604624	1.23294	0.895479	0.741826	1.33822	0.578035
467	Q9Y294	ASF1A	Histone chaperone ASF1A OS=Homo sapiens OX=9606 GN=ASF1A PE=1 SV=1			2	42.3537	32.2369	46.7301	41.3102	97.2587	103.805	100.638	82.2226	93.34	70.3077	107.907	126.826	130.968	92.3154	130.049	103.08		0.465527	0.354329	0.51363	0.454058	1.06901	1.14096	1.10615	0.903743	1.02594	0.772781	1.18605	1.394	1.43952	1.01468	1.42942	1.133		0.761135	1.06731	0.753243	0.70487	0.884017	0.817013	1.17533	0.792624
468	Q9UBL3	ASH2L	Set1/Ash2 histone methyltransferase complex subunit ASH2 OS=Homo sapiens OX=9606 GN=ASH2L PE=1 SV=1			9	298.35	276.375	474.53	375.56	890.879	966.796	940.375	891.781	1042.81	795.954	1172.57	1194.92	1284.85	891.45	1683.13	1215.72		0.339334	0.31434	0.539716	0.42715	1.01326	1.0996	1.06955	1.01428	1.18606	0.905293	1.33364	1.35906	1.46135	1.01391	1.91434	1.38272		0.926345	1.08522	0.763278	0.693816	0.791436	0.948325	1.01906	0.722297
469	P78348	ASIC1	Acid-sensing ion channel 1 OS=Homo sapiens OX=9606 GN=ASIC1 PE=1 SV=3			2	145.753	104.466	574.048	853.746	370.041	543.85	1027.53	672.578	2010.7	1178.6	2048.78	4174.89	426.546	925.268	2066.26	2166.09		0.197428	0.141503	0.777569	1.15643	0.501234	0.736665	1.39183	0.911031	2.72357	1.59646	2.77515	5.65504	0.577772	1.25331	2.79882	2.93405		0.716733	1.4697	0.586164	2.16921	1.48724	0.654558	2.03774	1.04831
470	P04424	ASL	Argininosuccinate lyase OS=Homo sapiens OX=9606 GN=ASL PE=1 SV=4			1	6.22626	7.15185	11.1955	13.0299	18.9104	15.5182	21.4377	22.5897	21.4505	17.56	23.467	31.3063	24.9611	13.6147	25.3249	16.7778		0.348087	0.399834	0.625899	0.728454	1.05721	0.867565	1.1985	1.26291	1.19922	0.981715	1.31195	1.75022	1.39548	0.761148	1.41582	0.937985		1.14866	0.820617	0.818629	0.545437	1.16385	1.05374	1.33406	0.662502
471	O43681	ASNA1	ATPase ASNA1 OS=Homo sapiens OX=9606 GN=ASNA1 PE=1 SV=2			5	177.816	139.161	230.059	212.472	411.439	458.252	434.842	355.109	624.88	491.392	521.124	589.641	522.508	431.179	535.389	482.562		0.409563	0.320529	0.529894	0.489386	0.947665	1.05549	1.00157	0.817921	1.43928	1.13182	1.2003	1.35812	1.20349	0.993132	1.23316	1.11148		0.782612	1.11378	0.786378	0.82521	0.923554	0.816639	1.13148	0.90133
472	P08243	ASNS	Asparagine synthetase [glutamine-hydrolyzing] OS=Homo sapiens OX=9606 GN=ASNS PE=1 SV=4			16	851.353	583.755	1281.17	1028.72	3709.46	3459.45	3454.13	3381.21	3966.45	3202.69	3879.64	4048.44	3919.86	2801.08	5188.78	4629.17		0.27359	0.187595	0.411716	0.330589	1.19207	1.11173	1.11002	1.08658	1.27466	1.02921	1.24676	1.301	1.25968	0.900153	1.66746	1.48763		0.685679	0.932602	0.807445	0.714587	0.802954	0.978889	1.04351	0.89215
473	Q9NWL6	ASNSD1	Asparagine synthetase domain-containing protein 1 OS=Homo sapiens OX=9606 GN=ASNSD1 PE=2 SV=2			2	114.115	78.7387	143.867	116.35	414.354	416.287	338.871	346.199	371.154	334.964	406.174	508.166	429.811	320.878	443.182	537.822		0.343349	0.236909	0.432867	0.350074	1.24671	1.25252	1.01959	1.04164	1.11673	1.00784	1.2221	1.52897	1.29322	0.965457	1.33345	1.6182		0.689994	1.00467	0.902493	0.746556	0.808733	1.02162	1.2511	1.21355
474	Q12797	ASPH	Aspartyl/asparaginyl beta-hydroxylase OS=Homo sapiens OX=9606 GN=ASPH PE=1 SV=3			8	601.937	561.396	964.551	866.32	1376.22	1624.85	1649.51	1633.52	1830.87	1516.96	1931.3	2225.58	2009.89	1536.52	2453.12	2214.9		0.413779	0.385911	0.663045	0.59552	0.946032	1.11694	1.13389	1.1229	1.25856	1.04278	1.3276	1.52989	1.38162	1.05622	1.68631	1.52255		0.932649	1.18066	0.828546	0.76448	0.898159	0.990306	1.15237	0.902891
475	Q6ICH7	ASPHD2	Aspartate beta-hydroxylase domain-containing protein 2 OS=Homo sapiens OX=9606 GN=ASPHD2 PE=2 SV=1			1	4.80543	0	5.52335	5.31603	10.2076	14.1439	9.53838	12.5493	17.3276	11.2063	15.7065	19.5726	12.1511	10.8809	15.0458	16.711		0.432029	0	0.496573	0.477934	0.917708	1.2716	0.857542	1.12824	1.55783	1.0075	1.41208	1.75966	1.09244	0.97824	1.35268	1.50239		0	1.38562	0.646731	0.895466	0.962465	1.31566	1.24615	1.11068
476	Q8IZT6	ASPM	Abnormal spindle-like microcephaly-associated protein OS=Homo sapiens OX=9606 GN=ASPM PE=1 SV=2			15	644.428	417.902	645.283	510.805	1448.64	1568.08	1027.36	983.768	1256.26	1311.41	1028.67	1249.62	1563.15	1102.65	1226.14	1280.59		0.524727	0.340278	0.525424	0.415925	1.17956	1.27681	0.836531	0.801036	1.02291	1.06782	0.837598	1.01751	1.2728	0.897836	0.998388	1.04272		0.648485	1.08245	1.0439	0.705403	0.791598	0.957569	1.21479	1.04441
477	Q9BZE9	ASPSCR1	Tether containing UBX domain for GLUT4 OS=Homo sapiens OX=9606 GN=ASPSCR1 PE=1 SV=1			3	218.501	179.578	294.032	284.915	764.904	888.653	706.858	670.604	1041.13	883.871	946.643	1120.82	962.649	767.641	1073.73	989.016		0.292585	0.240465	0.393725	0.381517	1.02425	1.18995	0.946521	0.897975	1.39413	1.18355	1.26761	1.50084	1.28904	1.02791	1.43778	1.32435		0.821864	1.16178	0.848954	0.797426	0.968993	0.948711	1.18399	0.921103
478	P00966	ASS1	Argininosuccinate synthase OS=Homo sapiens OX=9606 GN=ASS1 PE=1 SV=2			3	158.396	130.562	294.033	245.473	373.636	432.621	566.395	429.559	632.745	430.496	534.823	778.19	457	304.164	481.648	498.301		0.390673	0.322022	0.725212	0.605442	0.921547	1.06703	1.39697	1.05948	1.56062	1.06179	1.3191	1.91935	1.12716	0.750199	1.18795	1.22902		0.824276	1.15787	0.680363	0.665567	0.834848	0.758409	1.45504	1.03458
479	Q2TB18	ASTE1	Protein asteroid homolog 1 OS=Homo sapiens OX=9606 GN=ASTE1 PE=1 SV=1			10	772.649	621.865	1191.32	1061.84	1741.72	1987.68	1753.9	1690.32	1679.6	1554.16	1683.51	2139.16	2108.12	1635.45	2281.67	2341.34		0.490408	0.394704	0.756143	0.673961	1.10549	1.2616	1.11322	1.07286	1.06606	0.986441	1.06854	1.35775	1.33805	1.03804	1.4482	1.48607		0.804848	1.14122	0.925316	0.775786	0.891314	0.963749	1.27065	1.02615
480	O14525	ASTN1	Astrotactin-1 OS=Homo sapiens OX=9606 GN=ASTN1 PE=2 SV=3			1	21.6373	22.5586	34.8962	27.2211	78.359	68.9967	62.4868	59.617	72.8739	64.2097	80.8913	88.2188	70.478	61.1251	101.832	60.7964		0.35566	0.370804	0.573601	0.447443	1.28801	1.13412	1.02712	0.979946	1.19785	1.05544	1.32964	1.45008	1.15847	1.00473	1.67385	0.999332		1.04258	0.88052	0.881107	0.867293	0.780059	0.954074	1.09058	0.597026
481	Q8IXJ9	ASXL1	Putative Polycomb group protein ASXL1 OS=Homo sapiens OX=9606 GN=ASXL1 PE=1 SV=4			9	292.907	224.205	424.625	324.835	596.503	578.621	580.925	510.728	602.4	433.502	651.865	636.204	904.709	582.16	918.791	716.743		0.488887	0.374218	0.708736	0.542178	0.995616	0.965769	0.969615	0.85245	1.00546	0.723553	1.08802	1.06188	1.51004	0.971676	1.53354	1.19631		0.765448	0.970022	0.719625	0.643478	0.764993	0.879163	0.975975	0.780094
482	Q76L83	ASXL2	Putative Polycomb group protein ASXL2 OS=Homo sapiens OX=9606 GN=ASXL2 PE=1 SV=1			4	261.369	159.072	354.386	232.513	506.963	430.07	460.26	391.072	547.106	351.031	561.112	496.47	824.249	490.818	809.337	558.759		0.488612	0.297374	0.662501	0.434667	0.947733	0.803987	0.860425	0.731083	1.02278	0.656229	1.04896	0.928117	1.54088	0.917551	1.513	1.04456		0.608611	0.848326	0.641614	0.595473	0.656101	0.849676	0.884797	0.690391
483	Q9C0F0	ASXL3	Putative Polycomb group protein ASXL3 OS=Homo sapiens OX=9606 GN=ASXL3 PE=2 SV=3			1	8.62376	6.70635	12.7355	11.124	17.081	22.9073	20.2631	27.3015	19.6139	15.565	27.0832	31.9985	32.6409	21.9043	35.9699	31.5325		0.442474	0.344094	0.653441	0.570757	0.876403	1.17534	1.03967	1.4008	1.00636	0.798619	1.3896	1.6418	1.67476	1.12388	1.84557	1.61789		0.77766	1.3411	0.79357	0.671069	0.873464	1.34735	1.18149	0.876636
484	Q8NBU5	ATAD1	ATPase family AAA domain-containing protein 1 OS=Homo sapiens OX=9606 GN=ATAD1 PE=1 SV=1			3	71.3264	77.346	144.944	468.341	212.924	526.986	1321.79	377.542	1107.99	550.134	1025.42	1800.58	1566.35	1804.65	937.729	1273.29		0.0964329	0.104571	0.195964	0.633195	0.287872	0.712483	1.78705	0.510435	1.498	0.743779	1.38636	2.43438	2.1177	2.43988	1.26781	1.72148		1.0844	2.475	0.496515	1.15214	3.23119	0.285629	1.75594	1.35784
485	Q6PL18	ATAD2	ATPase family AAA domain-containing protein 2 OS=Homo sapiens OX=9606 GN=ATAD2 PE=1 SV=1			5	438.97	307.666	586.068	427.272	1344.47	1290.91	1084.54	852.249	1588.98	1256.57	1210.94	1217.75	1798.2	1116.78	1381.12	1134.22		0.339588	0.238011	0.453383	0.330538	1.04008	0.99865	0.839002	0.659301	1.22924	0.972085	0.936785	0.942053	1.39109	0.863943	1.06844	0.877434		0.700882	0.960163	0.790803	0.621054	0.729049	0.785816	1.00562	0.821232
486	Q9NVI7	ATAD3A	ATPase family AAA domain-containing protein 3A OS=Homo sapiens OX=9606 GN=ATAD3A PE=1 SV=2			7	84.3978	87.0754	212.459	952.495	241.516	521.04	2106.23	493.693	998.322	438.477	1863.49	2566.23	1681.38	2494.63	1981.34	1824.77		0.11232	0.115884	0.282749	1.26762	0.32142	0.693422	2.80306	0.657027	1.32861	0.583544	2.48001	3.41525	2.23765	3.31996	2.63685	2.42848		1.03173	2.15737	0.439214	1.48368	4.48319	0.234397	1.37711	0.920978
487	Q5T9A4	ATAD3B	ATPase family AAA domain-containing protein 3B OS=Homo sapiens OX=9606 GN=ATAD3B PE=1 SV=1			12	91.3484	100.725	207.95	878.288	271.54	606.268	2068.13	470.575	1035.47	484.176	1870.43	2627	1943.3	2872.87	1892.97	1813.47		0.109345	0.120569	0.248918	1.05132	0.325036	0.725709	2.47557	0.563283	1.23947	0.579564	2.23892	3.14455	2.32615	3.43886	2.2659	2.17074		1.10265	2.2327	0.467591	1.47835	4.22355	0.227536	1.40449	0.958003
488	Q96QE3	ATAD5	ATPase family AAA domain-containing protein 5 OS=Homo sapiens OX=9606 GN=ATAD5 PE=1 SV=4			7	502.15	481.653	1218.39	994.515	954.717	1084.75	1592.82	1150.66	1009.28	810.192	1456.96	1637.26	2341.3	1398.54	2547.23	1910.12		0.41781	0.400756	1.01375	0.827479	0.794365	0.902558	1.32529	0.957398	0.839764	0.674114	1.21225	1.36227	1.94806	1.16364	2.1194	1.5893		0.959182	1.1362	0.802743	0.597335	0.816253	0.722404	1.12375	0.749881
489	Q5SQI0	ATAT1	Alpha-tubulin N-acetyltransferase 1 OS=Homo sapiens OX=9606 GN=ATAT1 PE=1 SV=1			1	7.20476	4.222	6.23493	5.79808	26.9304	33.2354	16.6138	17.0637	32.9122	26.355	13.1064	24.7317	24.7448	21.7107	20.5104	19.2449		0.31396	0.183981	0.271698	0.252661	1.17354	1.44829	0.723975	0.74358	1.43421	1.14846	0.571134	1.07773	1.0783	0.946081	0.893776	0.838629		0.586001	1.23412	0.800767	0.877384	0.929935	1.02708	1.88699	0.9383
490	P18846	ATF1	Cyclic AMP-dependent transcription factor ATF-1 OS=Homo sapiens OX=9606 GN=ATF1 PE=1 SV=2			1	14.035	14.3889	14.0117	17.9677	27.7139	37.7428	33.7399	31.2914	39.9137	31.9421	42.3953	52.5635	41.6966	30.5159	37.7119	40.8011		0.455094	0.466569	0.454338	0.582614	0.898641	1.22383	1.09404	1.01464	1.29423	1.03574	1.37469	1.7044	1.35204	0.989497	1.22283	1.323		1.02522	1.36187	0.800279	0.731856	1.28234	0.92743	1.23984	1.08192
491	P18847	ATF3	Cyclic AMP-dependent transcription factor ATF-3 OS=Homo sapiens OX=9606 GN=ATF3 PE=1 SV=2			1	44.8039	34.8464	65.9514	55.2912	116.943	127.288	129.048	118.116	171.207	116.313	177.381	176.285	162.56	124.293	212.1	154.249		0.361676	0.281295	0.532388	0.446334	0.944014	1.02752	1.04173	0.953483	1.38206	0.938928	1.4319	1.42305	1.31225	1.00335	1.71216	1.24516		0.777754	1.08846	0.679371	0.764598	0.838363	0.915287	0.993821	0.727247
492	P18850	ATF6	Cyclic AMP-dependent transcription factor ATF-6 alpha OS=Homo sapiens OX=9606 GN=ATF6 PE=1 SV=3			3	119.495	101.064	156.708	113.8	288.467	295.209	252.554	186.684	239.965	199.933	297.742	317.434	405.527	286.942	372.669	268.364		0.453727	0.383743	0.595026	0.432102	1.09532	1.12092	0.958956	0.708845	0.911155	0.759152	1.13054	1.20531	1.5398	1.08953	1.41504	1.01899		0.845759	1.02337	0.833176	0.707578	0.726191	0.739184	1.06614	0.720114
493	Q99941	ATF6B	Cyclic AMP-dependent transcription factor ATF-6 beta OS=Homo sapiens OX=9606 GN=ATF6B PE=1 SV=2			2	73.388	62.0303	74.6173	71.5182	202.643	199.76	187.717	125.877	222.671	150.751	217.241	269.898	313.657	200.096	228.071	192.772		0.361357	0.305433	0.36741	0.352151	0.9978	0.983605	0.924306	0.61981	1.09642	0.742288	1.06968	1.32896	1.54443	0.985259	1.12301	0.949196		0.845238	0.985773	0.677012	0.637945	0.958467	0.670568	1.24239	0.845228
494	P17544	ATF7	Cyclic AMP-dependent transcription factor ATF-7 OS=Homo sapiens OX=9606 GN=ATF7 PE=1 SV=2			1	11.096	8.33469	11.8615	13.3592	26.4232	35.2276	23.0721	22.7999	57.6869	39.2217	35.6746	50.0658	38.3049	34.6688	30.266	36.0635		0.332437	0.249708	0.355371	0.400243	0.791641	1.05542	0.691242	0.683087	1.7283	1.17509	1.06881	1.49998	1.14762	1.03868	0.906772	1.08047		0.751144	1.33321	0.679907	0.905075	1.12627	0.988202	1.4034	1.19155
495	Q6VMQ6	ATF7IP	Activating transcription factor 7-interacting protein 1 OS=Homo sapiens OX=9606 GN=ATF7IP PE=1 SV=3			2	52.5649	54.3183	71.1189	70.8791	156.975	149.332	146.892	116.425	166.834	136.956	160.537	164.043	194.363	122.333	177.143	146.234		0.3684	0.380689	0.498436	0.496755	1.10016	1.04659	1.02949	0.815963	1.16925	0.959854	1.12512	1.14969	1.36219	0.857369	1.2415	1.02488		1.03336	0.951311	0.820912	0.629405	0.996628	0.792589	1.02184	0.825514
496	Q5U623	ATF7IP2	Activating transcription factor 7-interacting protein 2 OS=Homo sapiens OX=9606 GN=ATF7IP2 PE=1 SV=2			1	10.6956	9.53419	16.7407	10.1729	36.4522	32.8961	31.0604	30.4461	43.2855	35.594	43.8421	58.089	35.4685	26.0791	59.0395	44.9859		0.339808	0.302909	0.531865	0.323201	1.15812	1.04514	0.986814	0.967297	1.37521	1.13085	1.3929	1.84553	1.12686	0.828554	1.87573	1.42924		0.891412	0.902445	0.822308	0.735275	0.607675	0.980222	1.32496	0.761963
497	Q9BSB4	ATG101	Autophagy-related protein 101 OS=Homo sapiens OX=9606 GN=ATG101 PE=1 SV=1			1	5.73058	4.51273	4.75539	3.48839	10.8375	9.54753	13.2045	11.7331	15.9931	12.3884	17.9632	15.6521	14.3628	13.414	21.1048	16.3508		0.488499	0.384684	0.40537	0.297365	0.923835	0.813872	1.12561	1.00018	1.36332	1.05604	1.53126	1.33425	1.22435	1.14347	1.79906	1.39381		0.787482	0.880972	0.774609	0.93394	0.733565	0.888568	0.871343	0.774743
498	O75143	ATG13	Autophagy-related protein 13 OS=Homo sapiens OX=9606 GN=ATG13 PE=1 SV=1			3	35.6595	32.3994	56.0604	40.2177	130.856	120.044	110.123	129.072	115.942	109.745	161.444	185.723	122.823	100.474	173.646	151.21		0.351949	0.319773	0.5533	0.396937	1.29151	1.1848	1.08688	1.2739	1.14431	1.08315	1.59341	1.83303	1.21223	0.991649	1.71384	1.4924		0.908577	0.917375	0.946551	0.818039	0.717399	1.17207	1.15039	0.870795
499	Q6ZNE5	ATG14	Beclin 1-associated autophagy-related key regulator OS=Homo sapiens OX=9606 GN=ATG14 PE=1 SV=1			1	15.6343	12.7528	25.6006	28.0983	63.6331	69.523	53.0748	53.3057	73.2148	60.3824	64.5468	64.7444	75.6825	69.1309	90.278	67.492		0.274088	0.223572	0.448809	0.492597	1.11556	1.21882	0.930465	0.934513	1.28354	1.05858	1.13158	1.13505	1.3268	1.21195	1.58268	1.18322		0.815694	1.09256	0.824729	0.913433	1.09756	1.00435	1.00306	0.747602
500	Q676U5	ATG16L1	Autophagy-related protein 16-1 OS=Homo sapiens OX=9606 GN=ATG16L1 PE=1 SV=2			5	215.225	148.534	214.129	183.558	723.422	709.239	508.496	543.693	728.315	656.158	614.007	676.32	834.277	634.526	893.857	769.668		0.344189	0.237537	0.342437	0.293547	1.1569	1.13422	0.813191	0.869478	1.16473	1.04933	0.981925	1.08158	1.33418	1.01474	1.42946	1.23086		0.690134	0.980395	0.900926	0.76057	0.857231	1.06922	1.10149	0.861064
501	Q2TAZ0	ATG2A	Autophagy-related protein 2 homolog A OS=Homo sapiens OX=9606 GN=ATG2A PE=1 SV=3			6	206.147	148.257	283.915	224.825	714.028	713.86	592.162	617.802	708.592	670.767	691.406	783.627	772.011	597.12	832.464	792.97		0.343467	0.247015	0.473038	0.374587	1.18966	1.18938	0.986617	1.02934	1.1806	1.11758	1.15197	1.30562	1.28627	0.994877	1.38699	1.32119		0.719181	0.999765	0.946619	0.77346	0.791874	1.0433	1.13338	0.952558
502	Q96BY7	ATG2B	Autophagy-related protein 2 homolog B OS=Homo sapiens OX=9606 GN=ATG2B PE=1 SV=5			13	574.461	384.846	725.628	556.805	2093.94	1943.81	1646.26	1612.5	1804.51	1687.56	1872.46	2187.03	1942.72	1482.74	2271.28	2218.57		0.358163	0.239943	0.452413	0.347155	1.30552	1.21192	1.02641	1.00536	1.12507	1.05216	1.16744	1.36356	1.21124	0.924455	1.41609	1.38323		0.669925	0.928303	0.93519	0.763229	0.767342	0.979493	1.168	0.976793
503	Q9NT62	ATG3	Ubiquitin-like-conjugating enzyme ATG3 OS=Homo sapiens OX=9606 GN=ATG3 PE=1 SV=1			2	57.0662	58.1458	97.6295	75.8944	94.8326	133.19	150.822	118.85	167.33	121.21	172.978	259.36	144.887	142.467	170.267	166.926		0.491827	0.501132	0.841424	0.654099	0.817318	1.1479	1.29987	1.02431	1.44214	1.04465	1.49082	2.2353	1.24871	1.22786	1.46745	1.43866		1.01892	1.40447	0.724377	0.983297	0.777372	0.788015	1.49938	0.980378
504	Q9Y4P1	ATG4B	Cysteine protease ATG4B OS=Homo sapiens OX=9606 GN=ATG4B PE=1 SV=2			4	330.631	344.634	613.016	452.64	1272.75	1408.95	1315.5	1210.53	791.597	853.229	1102.73	1428.96	1489.06	1047.59	1779.69	1508.65		0.340502	0.354923	0.631318	0.466154	1.31075	1.45102	1.35478	1.24667	0.815231	0.878703	1.13565	1.47162	1.53352	1.07887	1.83282	1.55369		1.04235	1.10701	1.07786	0.703524	0.738382	0.920205	1.29584	0.847704
505	Q96DT6	ATG4C	Cysteine protease ATG4C OS=Homo sapiens OX=9606 GN=ATG4C PE=1 SV=1			3	130.256	122.912	188.199	172.286	603.639	639.122	506.18	512.41	704.082	588.083	570.741	751.828	619.903	430.483	708.777	598.658		0.253185	0.23891	0.365811	0.334881	1.17332	1.24229	0.983886	0.995996	1.36856	1.14309	1.10938	1.46136	1.20494	0.83675	1.37768	1.16364		0.943619	1.05878	0.835248	0.694436	0.915446	1.01231	1.31728	0.844635
506	Q86TL0	ATG4D	Cysteine protease ATG4D OS=Homo sapiens OX=9606 GN=ATG4D PE=1 SV=1			2	26.9127	17.4875	32.7053	21.3164	53.4223	50.9279	46.5905	52.4178	62.5964	52.8651	58.2315	72.5643	54.5491	48.923	81.4559	64.6325		0.545121	0.354212	0.662451	0.431767	1.08208	1.03155	0.943698	1.06173	1.2679	1.07079	1.17949	1.4698	1.1049	0.990943	1.6499	1.30914		0.649786	0.953308	0.844539	0.896862	0.651772	1.12507	1.24613	0.793466
507	Q9H1Y0	ATG5	Autophagy protein 5 OS=Homo sapiens OX=9606 GN=ATG5 PE=1 SV=2			3	61.7963	54.0816	81.9792	88.5311	231.465	270.931	193.559	223.646	331.629	274.047	257.478	304.426	285.815	273.101	415.964	304.368		0.271422	0.237537	0.360069	0.388846	1.01664	1.18998	0.85015	0.982298	1.45658	1.20367	1.13089	1.3371	1.25536	1.19951	1.827	1.33685		0.875159	1.17051	0.826366	0.955517	1.07992	1.15544	1.18234	0.731717
508	O95352	ATG7	Ubiquitin-like modifier-activating enzyme ATG7 OS=Homo sapiens OX=9606 GN=ATG7 PE=1 SV=1			1	8.55105	10.2082	14.2721	10.5312	41.12	44.1347	42.3079	34.8554	43.8287	36.9318	44.9153	55.9876	40.8119	31.5774	48.3691	54.1996		0.254663	0.304015	0.425044	0.313635	1.22461	1.3144	1.25999	1.03805	1.30528	1.09988	1.33764	1.66739	1.21544	0.940422	1.4405	1.61414		1.19379	1.07331	0.84264	0.77373	0.737887	0.823851	1.24652	1.12054
509	Q7Z3C6	ATG9A	Autophagy-related protein 9A OS=Homo sapiens OX=9606 GN=ATG9A PE=1 SV=3			6	213.27	194.628	257.192	232.257	724.294	793.098	521.495	534.391	937.029	751.004	700.661	898.298	789.852	630.586	803.638	719.135		0.320172	0.292185	0.38611	0.348676	1.08735	1.19064	0.782895	0.802255	1.40672	1.12745	1.05187	1.34857	1.18577	0.946668	1.20646	1.0796		0.91259	1.09499	0.801474	0.79836	0.903049	1.02473	1.28207	0.894849
510	P31939	ATIC	Bifunctional purine biosynthesis protein PURH OS=Homo sapiens OX=9606 GN=ATIC PE=1 SV=3			9	473.887	380.937	673.755	626.399	959.815	1208.51	1266.54	1089.04	1775.35	1158.17	1553.78	2111.8	1184.6	976.271	1249.79	1314.42		0.431429	0.346807	0.613389	0.570276	0.87382	1.10023	1.15306	0.991467	1.61629	1.0544	1.41457	1.92259	1.07847	0.888801	1.13781	1.19665		0.803856	1.25911	0.652362	0.824136	0.929713	0.859854	1.35914	1.05171
511	Q8WXF7	ATL1	Atlastin-1 OS=Homo sapiens OX=9606 GN=ATL1 PE=1 SV=1			2	91.5104	69.6765	129.687	127.273	240.518	281.14	304.21	260.007	372.51	282.81	350.475	469.354	362.851	212.304	389.95	387.006		0.342932	0.26111	0.485997	0.476951	0.901332	1.05356	1.14002	0.974366	1.39597	1.05982	1.31339	1.75889	1.35977	0.795601	1.46132	1.45029		0.761405	1.16889	0.759201	0.5851	0.981386	0.854696	1.33919	0.99245
512	Q8NHH9	ATL2	Atlastin-2 OS=Homo sapiens OX=9606 GN=ATL2 PE=1 SV=2			1	13.4403	9.6635	18.5412	20.5067	42.3549	40.3879	38.4532	31.1173	24.7749	29.0653	28.6871	40.8803	46.8038	43.6847	32.0569	35.289		0.422074	0.303469	0.582261	0.643984	1.3301	1.26833	1.20757	0.977195	0.778021	0.912755	0.900878	1.28379	1.46981	1.37186	1.0067	1.1082		0.718994	0.953559	1.17318	0.933358	1.10601	0.809225	1.42504	1.10082
513	Q13315	ATM	Serine-protein kinase ATM OS=Homo sapiens OX=9606 GN=ATM PE=1 SV=4			19	1118.96	913.99	1460.17	1206.65	4471.22	4526.26	3730.22	3827.71	4399.03	4316.28	4354.4	5589.34	3710.76	2996.23	4773.85	5020.4		0.326704	0.266859	0.426328	0.352307	1.30547	1.32154	1.08912	1.11758	1.28439	1.26023	1.27136	1.63193	1.08344	0.874814	1.39383	1.46581		0.816821	1.01231	0.981189	0.807444	0.826376	1.02614	1.28361	1.05165
514	P54259	ATN1	Atrophin-1 OS=Homo sapiens OX=9606 GN=ATN1 PE=1 SV=3			2	27.9516	31.3916	36.694	34.7797	98.5669	112.827	99.9754	101.216	110.371	110.789	125.471	137.682	133.355	110.005	167.03	124.831		0.30198	0.339145	0.39643	0.375748	1.06488	1.21895	1.0801	1.0935	1.19241	1.19693	1.35555	1.48747	1.44072	1.18846	1.80454	1.34863		1.12307	1.14467	1.00379	0.824903	0.947831	1.01241	1.09732	0.747357
515	P98196	ATP11A	Probable phospholipid-transporting ATPase IH OS=Homo sapiens OX=9606 GN=ATP11A PE=1 SV=3			4	237.906	130.003	590.526	750.405	692.414	983.425	1362.95	924.731	2209.34	1336.69	1751.31	3038.18	1990	1272.37	1662.74	2019.93		0.185514	0.101374	0.46048	0.58515	0.53993	0.766854	1.0628	0.721086	1.7228	1.04232	1.36563	2.36911	1.55176	0.992167	1.29657	1.5751		0.546447	1.42028	0.605018	0.639382	1.27074	0.678478	1.7348	1.21482
516	Q9Y2G3	ATP11B	Probable phospholipid-transporting ATPase IF OS=Homo sapiens OX=9606 GN=ATP11B PE=1 SV=2			8	135.287	83.0952	364.068	367.897	350.113	522.097	719.12	521.341	761.431	602.238	689.051	1151.53	670.798	473.048	696.405	931.82		0.282196	0.173329	0.759413	0.7674	0.730304	1.08905	1.50002	1.08747	1.58828	1.25621	1.4373	2.40199	1.39922	0.986735	1.45264	1.94369		0.614214	1.49122	0.790929	0.705202	1.01052	0.724971	1.67118	1.33804
517	Q8NB49	ATP11C	Phospholipid-transporting ATPase IG OS=Homo sapiens OX=9606 GN=ATP11C PE=1 SV=3			10	496.991	355.696	924.201	1376.59	1490.02	2580.91	2285.57	1708.31	4619.13	3078.56	2691.31	5835.36	4566.11	3138.36	2775.63	3703.3		0.177938	0.12735	0.330892	0.49286	0.533472	0.924043	0.818302	0.611626	1.65379	1.10222	0.963569	2.08923	1.6348	1.12363	0.993759	1.32589		0.715699	1.73213	0.66648	0.687316	1.48949	0.747433	2.16822	1.33422
518	Q9HD20	ATP13A1	Manganese-transporting ATPase 13A1 OS=Homo sapiens OX=9606 GN=ATP13A1 PE=1 SV=2			11	420.281	286.506	461.351	456.057	1200.29	1762.9	1449.6	1018.16	2876.21	1858.58	1656.93	3184.29	2583.93	1852.73	1540.42	2084.74		0.237423	0.161852	0.260624	0.257633	0.678062	0.995889	0.818901	0.575174	1.62481	1.04994	0.936025	1.79885	1.4597	1.04664	0.870206	1.1777		0.681701	1.46873	0.646191	0.71702	0.988525	0.702373	1.9218	1.35336
519	Q9NQ11	ATP13A2	Cation-transporting ATPase 13A2 OS=Homo sapiens OX=9606 GN=ATP13A2 PE=1 SV=2			6	161.515	88.4347	264.759	275.103	472.636	677.992	663.387	471.165	1529.49	889.727	736.023	1385.31	1155.16	760.318	767.763	929.133		0.194667	0.106586	0.319102	0.331569	0.569647	0.817153	0.79955	0.567874	1.84342	1.07235	0.887095	1.66965	1.39226	0.916377	0.92535	1.11984		0.547532	1.43449	0.581715	0.658193	1.03907	0.710242	1.88216	1.21018
520	Q9H7F0	ATP13A3	Probable cation-transporting ATPase 13A3 OS=Homo sapiens OX=9606 GN=ATP13A3 PE=1 SV=4			7	166.791	131.156	885.481	829.684	507.137	738.494	1007.77	767.402	1182.53	730.494	1136	2191.37	1478.38	927.301	1288.24	1541.38		0.200059	0.157316	1.0621	0.995172	0.60829	0.885793	1.20878	0.920467	1.4184	0.876197	1.36258	2.62846	1.77326	1.11226	1.54519	1.84882		0.786349	1.4562	0.617738	0.627241	0.936987	0.761485	1.92902	1.1965
521	P05023	ATP1A1	Sodium/potassium-transporting ATPase subunit alpha-1 OS=Homo sapiens OX=9606 GN=ATP1A1 PE=1 SV=1			33	755.959	498.628	1745.69	4258.6	1932.67	3788.83	5628.34	3102.89	10904.2	6451.92	9061.82	14388.3	12856	10412.7	11135.5	10326.6		0.114328	0.0754102	0.26401	0.644051	0.292288	0.573005	0.851204	0.469267	1.6491	0.975759	1.37047	2.17602	1.94428	1.57477	1.68408	1.56175		0.659597	1.96041	0.591691	0.809949	2.43949	0.551298	1.58779	0.927358
522	P13637	ATP1A3	Sodium/potassium-transporting ATPase subunit alpha-3 OS=Homo sapiens OX=9606 GN=ATP1A3 PE=1 SV=3			3	46.0318	24.6928	175.313	414.012	123.783	228.476	458.349	274.519	783.038	436.943	621.348	1343.34	890.813	557.625	659.335	912.332		0.0998702	0.0535733	0.380357	0.898237	0.268558	0.495699	0.99443	0.595594	1.69887	0.947987	1.34807	2.9145	1.9327	1.20982	1.43049	1.97939		0.536429	1.84578	0.55801	0.625973	2.36156	0.59893	2.16198	1.38372
523	P05026	ATP1B1	Sodium/potassium-transporting ATPase subunit beta-1 OS=Homo sapiens OX=9606 GN=ATP1B1 PE=1 SV=1			2	64.1519	38.0475	129.884	275.6	112.551	262.709	404.082	271.362	856.469	537.13	721.401	1481.81	995.199	857.441	865.085	692.774		0.126509	0.0750307	0.256135	0.54349	0.221953	0.518069	0.79686	0.535133	1.68898	1.05923	1.42262	2.92217	1.96256	1.6909	1.70597	1.36617		0.593085	2.33413	0.627145	0.861577	2.12189	0.671552	2.05407	0.800816
524	P54709	ATP1B3	Sodium/potassium-transporting ATPase subunit beta-3 OS=Homo sapiens OX=9606 GN=ATP1B3 PE=1 SV=1			10	114.34	94.8572	214.804	473.995	273.877	495.394	604.458	384.248	1285.6	734.519	853.895	1653.69	1516.25	1113.87	1048.9	1186.55		0.14337	0.118941	0.269341	0.594339	0.343412	0.621171	0.757925	0.481806	1.612	0.921008	1.07069	2.07355	1.90121	1.39667	1.31521	1.48781		0.829606	1.80882	0.571343	0.734622	2.20664	0.63569	1.93664	1.13123
525	Q9Y6H3	ATP23	Mitochondrial inner membrane protease ATP23 homolog OS=Homo sapiens OX=9606 GN=ATP23 PE=1 SV=3			1	46.8005	38.5844	83.3817	70.7871	136.356	165.317	170.867	182.014	157.027	144.472	215.263	265.63	156.15	114.914	219.226	260.746		0.37717	0.310955	0.671981	0.57048	1.09891	1.33231	1.37703	1.46687	1.2655	1.16431	1.73483	2.14074	1.25843	0.926103	1.76676	2.10138		0.824444	1.21239	0.920046	0.735921	0.848952	1.06524	1.23398	1.18939
526	P16615	ATP2A2	Sarcoplasmic/endoplasmic reticulum calcium ATPase 2 OS=Homo sapiens OX=9606 GN=ATP2A2 PE=1 SV=1			23	1107.47	889.487	1798.29	1966.53	3684.85	4651.32	5454.15	3203.91	11542.1	5761.16	6444.62	15715.3	13140.9	7181.17	6897.39	8323.32		0.150291	0.120709	0.24404	0.266871	0.500059	0.631216	0.740165	0.434792	1.56634	0.781828	0.874578	2.13267	1.78331	0.974533	0.936022	1.12953		0.80317	1.26228	0.499143	0.546475	1.09356	0.587426	2.43851	1.20673
527	P20020	ATP2B1	Plasma membrane calcium-transporting ATPase 1 OS=Homo sapiens OX=9606 GN=ATP2B1 PE=1 SV=4			19	161.331	93.9645	521.885	1387.64	304.869	633.903	1533.65	600.886	4182.64	2261.98	3411.26	6334.23	5276.06	3832.08	3733.65	4048.83		0.0650207	0.0378702	0.210334	0.559256	0.12287	0.25548	0.618102	0.242173	1.68572	0.911638	1.37483	2.55286	2.12639	1.54443	1.50476	1.63179		0.582433	2.07926	0.540802	0.726315	2.6589	0.391801	1.85686	1.08442
528	P23634	ATP2B4	Plasma membrane calcium-transporting ATPase 4 OS=Homo sapiens OX=9606 GN=ATP2B4 PE=1 SV=2			9	123.551	97.2586	525.326	1142.86	306.142	511.303	1209.97	553.353	2872.93	1718.76	2354.57	4172.24	4244.93	3160.69	2821.5	3200.45		0.0654787	0.0515444	0.278409	0.605685	0.162247	0.270977	0.641252	0.293262	1.52258	0.910897	1.24786	2.21117	2.2497	1.67508	1.49532	1.69615		0.787194	1.67015	0.59826	0.74458	2.17553	0.457328	1.77198	1.13431
529	P98194	ATP2C1	Calcium-transporting ATPase type 2C member 1 OS=Homo sapiens OX=9606 GN=ATP2C1 PE=1 SV=3			13	784.465	449.092	2074.12	2044.6	1814.13	3212.08	3709.07	2333.78	5876.7	3533.57	4353.59	9939.21	4203.59	4204.66	4125.82	5811.27		0.247487	0.141682	0.654354	0.645041	0.572331	1.01336	1.17016	0.736273	1.85401	1.11479	1.37349	3.13567	1.32617	1.32651	1.30163	1.83337		0.572482	1.77059	0.601285	1.00025	0.985767	0.629209	2.28299	1.40851
530	Q5VTU8	ATP5EP2	ATP synthase subunit epsilon-like protein, mitochondrial OS=Homo sapiens OX=9606 GN=ATP5EP2 PE=3 SV=1			2	3.43864	5.40394	12.6396	11.5663	9.59495	25.8716	58.2048	27.4958	57.4049	31.4403	106.273	324.799	74.7994	89.4301	101.018	67.9183		0.0947037	0.14883	0.348108	0.318548	0.264255	0.71253	1.60302	0.757262	1.58099	0.865898	2.92687	8.9453	2.06005	2.463	2.78214	1.87054		1.57153	2.69638	0.547694	1.1956	0.915084	0.472397	3.05627	0.672339
531	P25705	ATP5F1A	ATP synthase subunit alpha, mitochondrial OS=Homo sapiens OX=9606 GN=ATP5F1A PE=1 SV=1			20	232.373	198.173	585.19	1112.31	534.095	1394.64	4852.58	1447.04	4011.55	1519.63	6912.93	10005.4	4753.04	4795.39	4565.6	5778.42		0.0975224	0.0831694	0.245593	0.466815	0.224149	0.585303	2.03653	0.607295	1.68357	0.637759	2.90122	4.19907	1.99476	2.01253	1.91609	2.42509		0.852823	2.61122	0.378814	1.00891	1.90077	0.2982	1.44735	1.26564
532	P06576	ATP5F1B	ATP synthase subunit beta, mitochondrial OS=Homo sapiens OX=9606 GN=ATP5F1B PE=1 SV=3			22	245.514	172.788	645.084	1264.68	585.927	1470.24	5518.52	1425.54	3362.93	1446.23	6596.93	10385.9	5440.52	4429.88	4178.3	5788.92		0.101927	0.0717343	0.267812	0.525042	0.243252	0.610382	2.29106	0.591824	1.39615	0.600414	2.73877	4.31179	2.25867	1.8391	1.73465	2.40332		0.703781	2.50925	0.430051	0.814238	1.96049	0.258319	1.57435	1.38547
533	P36542	ATP5F1C	ATP synthase subunit gamma, mitochondrial OS=Homo sapiens OX=9606 GN=ATP5F1C PE=1 SV=1			12	204.869	166.477	322.596	583.107	460.988	962.346	2512.88	745.509	2496.39	910.368	3453.46	8901.46	2181.59	2877.67	2999.41	3189.93		0.15335	0.124612	0.241471	0.436471	0.345061	0.720341	1.88096	0.558033	1.86861	0.681434	2.585	6.66297	1.63298	2.15401	2.24514	2.38774		0.812602	2.08757	0.364674	1.31907	1.80755	0.296675	2.57755	1.06352
534	P30049	ATP5F1D	ATP synthase subunit delta, mitochondrial OS=Homo sapiens OX=9606 GN=ATP5F1D PE=1 SV=2			2	1.99165	0	11.5393	13.6738	6.10134	15.7098	57.9215	12.576	31.9261	15.4419	64.3402	101.012	56.9092	39.6868	47.6052	56.7243		0.0821907	0	0.476199	0.564285	0.251788	0.648306	2.39028	0.518982	1.31751	0.63725	2.65517	4.16852	2.34851	1.63778	1.96455	2.34088		0	2.57481	0.483676	0.697371	1.18498	0.217121	1.56997	1.19156
535	Q9UII2	ATP5IF1	ATPase inhibitor, mitochondrial OS=Homo sapiens OX=9606 GN=ATP5IF1 PE=1 SV=1			1	32.9114	28.2409	43.6491	79.2514	42.9853	104.997	284.403	79.008	235.963	94.4517	429.085	743.35	231.062	257.344	301.067	291.565		0.242476	0.208066	0.321587	0.583888	0.316696	0.77357	2.09535	0.582095	1.73847	0.695877	3.1613	5.47666	1.70236	1.89599	2.21812	2.14812		0.858089	2.44263	0.400282	1.11374	1.81565	0.277803	1.73241	0.968439
536	P56385	ATP5ME	ATP synthase subunit e, mitochondrial OS=Homo sapiens OX=9606 GN=ATP5ME PE=1 SV=2			2	10.2985	9.51341	35.2998	46.8366	38.7056	114.961	318.049	85.371	457.402	149.23	422.381	1772.21	263.685	280.712	339.902	365.284		0.0534924	0.0494145	0.183354	0.243278	0.201044	0.597129	1.65201	0.443433	2.37583	0.775129	2.19393	9.2052	1.36963	1.45807	1.76552	1.89735		0.923767	2.97014	0.326256	1.06457	1.32682	0.268421	4.19576	1.07467
537	P56134	ATP5MF	ATP synthase subunit f, mitochondrial OS=Homo sapiens OX=9606 GN=ATP5MF PE=1 SV=3			2	6.18094	3.63846	25.8063	33.8182	18.6089	56.9482	163.399	44.2562	182.917	53.2225	179.245	525.575	147.624	133.612	153.571	171.387		0.0695796	0.0409586	0.290504	0.380695	0.209483	0.641072	1.8394	0.498197	2.05912	0.599132	2.01778	5.91646	1.66182	1.50409	1.72877	1.92932		0.588658	3.06027	0.290965	0.905083	1.31046	0.270847	2.93216	1.11601
538	O75964	ATP5MG	ATP synthase subunit g, mitochondrial OS=Homo sapiens OX=9606 GN=ATP5MG PE=1 SV=3			5	34.361	26.695	59.3556	110.668	57.9749	184.584	541.469	189.69	781.983	270.12	973.719	1865.65	532.89	687.237	922.77	621.066		0.0976714	0.0758807	0.168719	0.314574	0.164794	0.524681	1.53913	0.539195	2.22279	0.767818	2.7678	5.30312	1.51474	1.95348	2.62298	1.76538		0.776898	3.18386	0.34543	1.28964	1.86449	0.350325	1.916	0.673045
539	P24539	ATP5PB	ATP synthase F(0) complex subunit B1, mitochondrial OS=Homo sapiens OX=9606 GN=ATP5PB PE=1 SV=2			8	96.3041	108.928	147.936	430.936	240.729	536.003	1854.77	382.825	3859.92	876.754	5204.28	12101.6	971.556	3612.31	3427.58	3669.01		0.0745314	0.0843013	0.11449	0.333509	0.186304	0.414822	1.43544	0.296275	2.98726	0.678535	4.02768	9.36564	0.751904	2.79563	2.65266	2.83951		1.13108	2.22658	0.227143	3.71807	2.91299	0.2064	2.32532	1.07044
540	O75947	ATP5PD	ATP synthase subunit d, mitochondrial OS=Homo sapiens OX=9606 GN=ATP5PD PE=1 SV=3			9	82.2859	135.121	216.205	541.603	219.08	519.177	2293.68	418.487	2895	813.179	4732.17	9997.81	1131.91	3322.6	4491.04	3275.35		0.076045	0.124873	0.199807	0.500525	0.202464	0.4798	2.11972	0.386747	2.67543	0.751504	4.37326	9.23953	1.04606	3.0706	4.15042	3.02693		1.64209	2.36981	0.280891	2.93539	2.50504	0.182452	2.11273	0.729308
541	P18859	ATP5PF	ATP synthase-coupling factor 6, mitochondrial OS=Homo sapiens OX=9606 GN=ATP5PF PE=1 SV=1			6	41.4456	40.3688	100.891	158.213	145.586	269.715	960.623	232.479	951.783	391.339	1527.48	2562.32	1027.63	976.015	1009.27	1135.4		0.0765228	0.0745347	0.186279	0.292115	0.268802	0.497986	1.77364	0.429236	1.75732	0.722546	2.82025	4.73092	1.89736	1.80206	1.86346	2.09634		0.974019	1.85262	0.411164	0.949773	1.56816	0.242009	1.67748	1.12497
542	P48047	ATP5PO	ATP synthase subunit O, mitochondrial OS=Homo sapiens OX=9606 GN=ATP5PO PE=1 SV=1			11	75.7956	70.0999	160.542	372.885	192.625	427.981	1680.67	403.387	1685.42	627.2	2774.18	5416.4	1589.7	2029.92	2266.46	2110.83		0.0855592	0.0791298	0.181222	0.420918	0.217438	0.483111	1.89716	0.455349	1.90253	0.707992	3.13153	6.11411	1.79448	2.2914	2.55841	2.38274		0.924854	2.22184	0.372133	1.27692	2.32266	0.240016	1.95243	0.931333
543	Q15904	ATP6AP1	V-type proton ATPase subunit S1 OS=Homo sapiens OX=9606 GN=ATP6AP1 PE=1 SV=2			9	492.983	417.227	773.18	755.043	1522.98	1972.48	1829.38	1337.4	2101.04	1631.95	1715.77	3057.18	2905.46	1957.36	1837.15	2497.52		0.280803	0.237653	0.440404	0.430073	0.867491	1.12353	1.04202	0.761784	1.19675	0.92956	0.977304	1.74137	1.65495	1.11491	1.04644	1.42259		0.846331	1.29515	0.776734	0.673683	0.976542	0.731067	1.78181	1.35945
544	O75787	ATP6AP2	Renin receptor OS=Homo sapiens OX=9606 GN=ATP6AP2 PE=1 SV=2			3	65.247	53.1416	80.0009	84.1974	223.244	307.887	266.515	177.833	540.733	277.136	284.825	524.691	587.602	384.202	334.016	349.304		0.184206	0.15003	0.225859	0.237707	0.630265	0.86923	0.752428	0.50206	1.5266	0.782414	0.804121	1.48131	1.65892	1.08468	0.942998	0.986159		0.814468	1.37915	0.512519	0.653847	1.05246	0.667253	1.84215	1.04577
545	Q93050	ATP6V0A1	V-type proton ATPase 116 kDa subunit a isoform 1 OS=Homo sapiens OX=9606 GN=ATP6V0A1 PE=1 SV=3			16	493.465	339.366	651.687	591.686	1288.11	1737.4	1513.88	1215.01	2061.05	1508.58	1773.58	2362.4	2062.88	1812.15	1787.87	2023.61		0.334241	0.229864	0.44141	0.400769	0.872481	1.1768	1.0254	0.822968	1.39602	1.02181	1.20131	1.60013	1.39726	1.22743	1.21099	1.37066		0.687721	1.3488	0.731947	0.878456	0.90793	0.80258	1.332	1.13186
546	Q9Y487	ATP6V0A2	V-type proton ATPase 116 kDa subunit a isoform 2 OS=Homo sapiens OX=9606 GN=ATP6V0A2 PE=1 SV=2			14	1345.66	1001.67	1873.32	1747.44	3220.24	4333.65	3664.4	3225.68	4467.72	3713.92	3796.52	6343.05	4298.6	3915.07	3906.26	5513.57		0.403732	0.300526	0.562043	0.524276	0.966153	1.3002	1.09941	0.967785	1.34043	1.11427	1.13905	1.90307	1.28969	1.17462	1.17198	1.65421		0.744371	1.34575	0.831279	0.910778	0.932804	0.880275	1.67075	1.41147
547	P27449	ATP6V0C	V-type proton ATPase 16 kDa proteolipid subunit OS=Homo sapiens OX=9606 GN=ATP6V0C PE=1 SV=1			4	180.393	135.192	261.839	197.977	453.423	668.413	528.499	472.903	1155.77	693.971	597.047	1117.75	678.495	646.055	627.865	778.985		0.292362	0.219105	0.42436	0.32086	0.734859	1.08329	0.856534	0.76643	1.87315	1.12471	0.96763	1.81153	1.09963	1.04706	1.01758	1.2625		0.74943	1.47415	0.60044	0.952188	0.756102	0.894804	1.87213	1.24069
548	P61421	ATP6V0D1	V-type proton ATPase subunit d 1 OS=Homo sapiens OX=9606 GN=ATP6V0D1 PE=1 SV=1			6	311.632	337.712	300.55	300.322	651.936	1001.94	762.592	654.035	2809.44	1333.91	1667.04	3800.6	907.668	1873.12	2617.01	1673.44		0.266314	0.288601	0.256843	0.256648	0.55713	0.856235	0.651694	0.558924	2.40088	1.13993	1.42461	3.24791	0.775673	1.60073	2.23644	1.43008		1.08369	1.53687	0.474796	2.06366	0.999241	0.857647	2.27985	0.639447
549	P38606	ATP6V1A	V-type proton ATPase catalytic subunit A OS=Homo sapiens OX=9606 GN=ATP6V1A PE=1 SV=2			24	1242.55	1272.39	2900.58	2760.99	3625.12	5094.35	5490.28	4740.45	4311.41	3995.22	4954.5	7947.26	5291.41	5201.38	5476.67	7056.49		0.343471	0.35172	0.801792	0.763206	1.00207	1.4082	1.51765	1.31038	1.19178	1.10438	1.36955	2.19682	1.46268	1.43779	1.51389	1.95059		1.02402	1.40529	0.926662	0.982986	0.951875	0.863426	1.60405	1.28846
550	P21281	ATP6V1B2	V-type proton ATPase subunit B, brain isoform OS=Homo sapiens OX=9606 GN=ATP6V1B2 PE=1 SV=3			10	139.72	148.333	275.838	255.851	394.59	565.968	523.555	490.619	523.291	454.323	619.67	867.997	585.907	574.229	660.725	770.907		0.340053	0.361016	0.67134	0.622695	0.96036	1.37746	1.27424	1.19408	1.2736	1.10574	1.50816	2.11255	1.42599	1.39757	1.60808	1.87625		1.06164	1.43432	0.868203	0.980069	0.927541	0.937092	1.40074	1.16676
551	P21283	ATP6V1C1	V-type proton ATPase subunit C 1 OS=Homo sapiens OX=9606 GN=ATP6V1C1 PE=1 SV=4			6	106.429	130.234	227.298	252.059	323.068	400.555	461.027	340.984	491.057	420.293	510.92	983.694	443.499	684.525	789.921	738.165		0.312096	0.381903	0.666537	0.739147	0.947377	1.1746	1.35193	0.999914	1.43999	1.23248	1.49824	2.88462	1.30053	2.00733	2.31639	2.16462		1.22367	1.23985	0.855895	1.54346	1.10894	0.739618	1.92534	0.93448
552	Q8NEY4	ATP6V1C2	V-type proton ATPase subunit C 2 OS=Homo sapiens OX=9606 GN=ATP6V1C2 PE=1 SV=2			1	11.5879	13.0993	11.5309	15.5181	31.0112	47.4326	45.8801	26.5304	70.476	53.4422	52.3932	93.2384	33.9962	51.8963	59.183	56.2588		0.315164	0.356271	0.313614	0.422057	0.843433	1.29006	1.24783	0.721566	1.91678	1.4535	1.42497	2.53587	0.924618	1.41146	1.60964	1.53011		1.13043	1.52953	0.758304	1.52653	1.34578	0.578255	1.77959	0.950591
553	Q9Y5K8	ATP6V1D	V-type proton ATPase subunit D OS=Homo sapiens OX=9606 GN=ATP6V1D PE=1 SV=1			4	123.151	247.513	212.061	185.894	199.241	286.056	282.798	206.301	715.326	320.073	743.168	1178.86	296.062	615.688	1220.02	637.717		0.369329	0.74229	0.63597	0.557495	0.597523	0.857881	0.84811	0.618696	2.14526	0.959897	2.22876	3.5354	0.887889	1.84645	3.65883	1.91251		2.00983	1.43573	0.447451	2.07959	0.876606	0.7295	1.58626	0.52271
554	P36543	ATP6V1E1	V-type proton ATPase subunit E 1 OS=Homo sapiens OX=9606 GN=ATP6V1E1 PE=1 SV=1			1	13.9014	17.3358	25.893	24.3049	39.2892	48.9962	55.0768	45.3541	85.3944	66.1663	77.5359	119.27	62.0355	69.6741	93.0863	98.625		0.277168	0.345644	0.516258	0.484595	0.783354	0.976893	1.09813	0.904276	1.70261	1.31923	1.54592	2.37802	1.23687	1.38917	1.85597	1.9664		1.24705	1.24707	0.774832	1.12313	0.938667	0.82347	1.53826	1.0595
555	Q96A05	ATP6V1E2	V-type proton ATPase subunit E 2 OS=Homo sapiens OX=9606 GN=ATP6V1E2 PE=1 SV=1			3	205.239	274.225	302	418.183	498.131	798.955	743.05	691.675	989.464	886.798	982.399	1824.18	763.544	1373.74	1300.47	1406.44		0.334214	0.446552	0.491781	0.680975	0.811163	1.30103	1.20999	1.12633	1.61126	1.44407	1.59975	2.97052	1.24337	2.23702	2.1177	2.29027		1.33613	1.60391	0.896241	1.79916	1.38471	0.930859	1.85686	1.08149
556	O75348	ATP6V1G1	V-type proton ATPase subunit G 1 OS=Homo sapiens OX=9606 GN=ATP6V1G1 PE=1 SV=3			3	31.1613	34.8312	46.3488	61.2999	75.2672	95.3776	116.388	80.7221	159.712	116.337	161.525	262.405	101.726	177.117	226.576	172.408		0.338833	0.378737	0.503974	0.666545	0.818419	1.03709	1.26555	0.877733	1.73663	1.26499	1.75634	2.85326	1.10612	1.92588	2.46368	1.87468		1.11777	1.26719	0.728417	1.74112	1.32258	0.69356	1.62455	0.760928
557	O95670	ATP6V1G2	V-type proton ATPase subunit G 2 OS=Homo sapiens OX=9606 GN=ATP6V1G2 PE=1 SV=1			1	6.17144	12.0048	19.1616	20.2059	33.7244	48.4345	60.9754	44.8096	84.3168	75.8882	78.59	110.302	45.1602	59.9861	79.384	78.3097		0.145748	0.283512	0.452531	0.477193	0.796454	1.14386	1.44003	1.05825	1.99127	1.79222	1.85602	2.60495	1.06653	1.41666	1.87478	1.8494		1.94522	1.43619	0.900037	1.3283	1.0545	0.73488	1.40351	0.986467
558	Q9UI12	ATP6V1H	V-type proton ATPase subunit H OS=Homo sapiens OX=9606 GN=ATP6V1H PE=1 SV=1			7	399.033	298.528	454.367	436.396	1422.06	1414.96	1248.09	1241.03	2098.13	1609.75	1866.59	2375.41	1563.02	1374.81	2306.73	1748		0.291146	0.217814	0.331519	0.318407	1.03758	1.03239	0.910642	0.905491	1.53086	1.17452	1.36192	1.73317	1.14042	1.0031	1.68306	1.27539		0.748129	0.995007	0.767231	0.879586	0.960448	0.994343	1.27259	0.757783
559	Q04656	ATP7A	Copper-transporting ATPase 1 OS=Homo sapiens OX=9606 GN=ATP7A PE=1 SV=4			7	285.605	187.792	599.111	639.846	811.939	1094.95	987.907	770.479	2053.07	1418.07	1305.72	2279.47	1626.72	1187.58	1318.16	1528.04		0.239133	0.157236	0.501628	0.535735	0.679826	0.916787	0.827162	0.645112	1.71901	1.18733	1.09326	1.90857	1.36203	0.994345	1.10368	1.27941		0.657524	1.34856	0.690707	0.730046	1.06799	0.77991	1.74576	1.15922
560	P35670	ATP7B	Copper-transporting ATPase 2 OS=Homo sapiens OX=9606 GN=ATP7B PE=1 SV=4			15	594.454	423.182	1294.31	1086.65	1839.81	2203.04	2492.27	2100.52	3126.19	2291.93	3270.91	5133.61	2406.96	1723.24	2950.22	3449.22		0.298443	0.212456	0.649802	0.545547	0.923667	1.10603	1.25123	1.05456	1.56949	1.15065	1.64214	2.5773	1.2084	0.865144	1.48114	1.73166		0.711884	1.19743	0.733138	0.71594	0.839559	0.842814	1.56947	1.16914
561	Q9Y2Q0	ATP8A1	Phospholipid-transporting ATPase IA OS=Homo sapiens OX=9606 GN=ATP8A1 PE=1 SV=1			7	282.384	206.348	449.98	568.333	905.244	1262.07	1438.62	987.393	3069.34	1561.92	1706.28	4241.47	1766.86	1441.43	1547.16	2159.65		0.187511	0.137021	0.2988	0.37739	0.601109	0.838052	0.955286	0.655658	2.03813	1.03716	1.13302	2.81646	1.17325	0.957152	1.02736	1.43407		0.730735	1.39418	0.508878	0.815814	1.26302	0.686347	2.4858	1.39588
562	O43520	ATP8B1	Phospholipid-transporting ATPase IC OS=Homo sapiens OX=9606 GN=ATP8B1 PE=1 SV=3			2	22.2841	20.2067	99.3789	90.4981	78.4556	109.482	141.081	92.5326	213.01	156.396	178.647	308.058	195.238	122.825	170.095	217.135		0.175125	0.158799	0.780993	0.711201	0.616562	0.86039	1.10872	0.727189	1.67399	1.22907	1.40394	2.42095	1.53432	0.965249	1.33673	1.70641		0.906777	1.39546	0.734219	0.629104	0.910637	0.655883	1.7244	1.27655
563	P98198	ATP8B2	Phospholipid-transporting ATPase ID OS=Homo sapiens OX=9606 GN=ATP8B2 PE=1 SV=2			3	13.2357	9.15671	53.7353	75.9492	50.9946	70.8568	84.396	58.8911	151.397	87.3252	102.766	197.939	159.182	112.309	114.338	150.07		0.141253	0.0977213	0.573468	0.810537	0.544219	0.75619	0.900682	0.628491	1.61572	0.931943	1.09673	2.11242	1.69881	1.19857	1.22023	1.60156		0.691819	1.3895	0.576796	0.705538	1.41339	0.697795	1.92611	1.31251
564	O75110	ATP9A	Probable phospholipid-transporting ATPase IIA OS=Homo sapiens OX=9606 GN=ATP9A PE=1 SV=3			8	235.087	138.963	520.353	515.765	640.194	1016.86	1324.54	860.521	1845.13	1102.49	1538.72	2951.59	1767.55	1083.99	1326.27	2036.4		0.209527	0.123854	0.463777	0.459688	0.570588	0.9063	1.18053	0.766959	1.64452	0.98262	1.37142	2.63067	1.57537	0.966131	1.18207	1.81499		0.591113	1.58836	0.597513	0.613273	0.991183	0.649675	1.91821	1.53543
565	O43861	ATP9B	Probable phospholipid-transporting ATPase IIB OS=Homo sapiens OX=9606 GN=ATP9B PE=2 SV=4			3	223.323	132.889	564.171	467.456	550.609	780.365	1305.46	734.084	1793.06	870.633	1626.48	2704.5	756.571	867.46	1479.51	1748.59		0.268775	0.159936	0.678995	0.562596	0.662673	0.939191	1.57116	0.88349	2.158	1.04783	1.95751	3.25494	0.910554	1.04401	1.78063	2.10448		0.595053	1.41728	0.485557	1.14657	0.828571	0.562318	1.66279	1.18187
566	Q5TC12	ATPAF1	ATP synthase mitochondrial F1 complex assembly factor 1 OS=Homo sapiens OX=9606 GN=ATPAF1 PE=1 SV=1			2	20.341	19.5143	43.686	36.6329	80.5818	91.5828	111.344	117.265	126.311	119.717	133.267	174.314	85.9137	92.4742	178.433	142.597		0.259826	0.249267	0.558025	0.467932	1.02931	1.16984	1.42226	1.49789	1.61344	1.52921	1.70229	2.22661	1.09742	1.18122	2.27922	1.82147		0.959358	1.13652	0.947796	1.07636	0.83855	1.05318	1.30801	0.799163
567	Q13535	ATR	Serine/threonine-protein kinase ATR OS=Homo sapiens OX=9606 GN=ATR PE=1 SV=3			14	1002.63	727.89	1163.07	1036.95	3443.15	3439.58	2923.04	3090.64	3965.3	3630.03	3846.7	4367.16	3168.06	2652.96	4108.35	3652.48		0.346357	0.251449	0.401781	0.358213	1.18943	1.1882	1.00976	1.06766	1.36981	1.25399	1.32884	1.50863	1.0944	0.916462	1.41922	1.26174		0.725981	0.998963	0.915449	0.837408	0.891563	1.05734	1.1353	0.889038
568	Q6UW56	ATRAID	All-trans retinoic acid-induced differentiation factor OS=Homo sapiens OX=9606 GN=ATRAID PE=1 SV=2			1	55.9741	36.9266	95.5561	121.687	166.136	224.917	355.807	182.82	379.186	232.224	329.596	709.233	557.18	334.693	341.127	457.508		0.193268	0.127501	0.329937	0.420162	0.573636	0.776596	1.22853	0.631243	1.30926	0.801826	1.13803	2.44885	1.92384	1.15563	1.17785	1.57969		0.659709	1.35381	0.612428	0.600691	1.27346	0.513818	2.15183	1.34117
569	Q8WXE1	ATRIP	ATR-interacting protein OS=Homo sapiens OX=9606 GN=ATRIP PE=1 SV=1			1	45.7899	45.1719	65.7291	53.301	250.552	276.272	225.506	242.279	382.571	299.846	374.526	395.111	241.291	212.494	390.451	285.113		0.199042	0.196356	0.285715	0.231692	1.08912	1.20092	0.980244	1.05315	1.66298	1.30339	1.62801	1.71749	1.04886	0.923682	1.69724	1.23935		0.986504	1.10265	0.783766	0.880654	0.810919	1.07438	1.05496	0.730215
570	O75882	ATRN	Attractin OS=Homo sapiens OX=9606 GN=ATRN PE=1 SV=2			2	18.125	10.8688	71.9734	62.283	27.4609	37.6751	58.627	50.2717	105.335	50.2359	75.4999	135.402	95.4108	70.217	80.5836	97.8744		0.294319	0.17649	1.16872	1.01137	0.445917	0.611778	0.952001	0.816325	1.71046	0.815744	1.22599	2.19869	1.54931	1.1402	1.30854	1.58931		0.599658	1.37195	0.476916	0.735944	0.865361	0.857484	1.79341	1.21457
571	P46100	ATRX	Transcriptional regulator ATRX OS=Homo sapiens OX=9606 GN=ATRX PE=1 SV=5			11	466.067	338.713	873.935	756.2	1299.76	1415.64	1691.64	1544.26	1291.47	1224.49	1676.38	2036.4	1680.03	1285.41	2355.75	2518.02		0.393527	0.285995	0.737914	0.638504	1.09746	1.19531	1.42835	1.30391	1.09046	1.03391	1.41546	1.71945	1.41855	1.08535	1.9891	2.12611		0.726747	1.08915	0.948137	0.765111	0.865282	0.912877	1.21476	1.06888
572	Q9UBB4	ATXN10	Ataxin-10 OS=Homo sapiens OX=9606 GN=ATXN10 PE=1 SV=1			7	184.249	179.601	211.682	239.75	658.545	695.264	659.202	534.928	1277.01	977.887	999.624	1540.99	731.191	859.938	1368.51	1061.89		0.258505	0.251984	0.296994	0.336374	0.923951	0.975469	0.924873	0.750514	1.79167	1.37199	1.40249	2.16204	1.02587	1.20651	1.92005	1.48985		0.974773	1.05576	0.765763	1.17608	1.1326	0.811478	1.54157	0.775946
573	Q99700	ATXN2	Ataxin-2 OS=Homo sapiens OX=9606 GN=ATXN2 PE=1 SV=2			15	1119.22	1061.08	1191.38	1036.6	2208.51	3153.11	1803.94	1863.6	2941.28	2928.58	2079.29	2643.21	2966.25	2462.85	2408.69	2367.44		0.484759	0.459578	0.516014	0.448975	0.956556	1.36568	0.781327	0.807167	1.27393	1.26843	0.900588	1.14483	1.28475	1.06672	1.04326	1.02539		0.948053	1.42771	0.995682	0.830291	0.870083	1.03307	1.27121	0.982875
574	Q8WWM7	ATXN2L	Ataxin-2-like protein OS=Homo sapiens OX=9606 GN=ATXN2L PE=1 SV=2			15	1246.56	1591.75	1698.85	1718.76	2180.5	3542.01	2219.8	2422.41	2316.16	2532.68	2181.56	3016.99	3436.94	3059.38	2950.24	3047.72		0.543154	0.693561	0.740227	0.748902	0.950092	1.54333	0.967216	1.0555	1.0092	1.10355	0.950554	1.31457	1.49755	1.33304	1.28549	1.32796		1.27691	1.6244	1.09348	0.890146	1.01172	1.09127	1.38295	1.03304
575	P54252	ATXN3	Ataxin-3 OS=Homo sapiens OX=9606 GN=ATXN3 PE=1 SV=5			2	105.583	137.719	176.209	194.825	579.603	743.994	519.334	645.665	772.444	770.621	684.514	961.544	552.241	645.904	879.211	705.843		0.210129	0.274085	0.350687	0.387736	1.15351	1.48068	1.03357	1.28499	1.5373	1.53367	1.3623	1.91364	1.09906	1.28546	1.74979	1.40475		1.30437	1.28363	0.99764	1.16961	1.10565	1.24326	1.40471	0.802814
576	O15265	ATXN7	Ataxin-7 OS=Homo sapiens OX=9606 GN=ATXN7 PE=1 SV=1			3	99.7234	69.6344	131.286	110.817	166.171	158.515	183.987	139.142	217.311	145.738	244.817	224.826	307.423	197.797	333.072	251.2		0.504527	0.352299	0.664211	0.560653	0.840703	0.80197	0.930839	0.703956	1.09943	0.737327	1.23859	1.13745	1.55533	1.00071	1.6851	1.27089		0.698275	0.953927	0.670643	0.643403	0.844088	0.75626	0.918343	0.754191
577	Q9ULK2	ATXN7L1	Ataxin-7-like protein 1 OS=Homo sapiens OX=9606 GN=ATXN7L1 PE=1 SV=3			2	63.6282	33.501	82.4575	60.6459	89.7113	91.6914	115.96	91.163	128.432	84.4282	141.304	115.451	199.381	109.955	212.089	143.472		0.528965	0.278506	0.6855	0.504172	0.745803	0.762265	0.964019	0.757872	1.0677	0.701883	1.17471	0.959787	1.65753	0.914097	1.76317	1.19274		0.526512	1.02207	0.657377	0.551482	0.735481	0.786159	0.81704	0.676471
578	Q96GX2	ATXN7L3B	Ataxin-7-like protein 3B OS=Homo sapiens OX=9606 GN=ATXN7L3B PE=1 SV=2			1	12.4601	13.4814	19.0421	21.1143	47.1652	71.5453	40.1656	65.2098	71.9913	66.1644	60.4589	112.801	60.1859	68.9291	81.2937	90.4187		0.259853	0.281152	0.397119	0.440334	0.98362	1.49206	0.837645	1.35994	1.50136	1.37984	1.26086	2.35244	1.25516	1.4375	1.69536	1.88566		1.08197	1.51691	0.919061	1.14527	1.10882	1.62352	1.86575	1.11225
579	Q9H7T9	AUNIP	Aurora kinase A and ninein-interacting protein OS=Homo sapiens OX=9606 GN=AUNIP PE=1 SV=1			2	62.7954	43.495	49.5007	41.3223	174.332	160.793	103.431	98.3033	181.673	150.167	131.357	147.327	213.806	165.336	172.221	132.279		0.397058	0.275021	0.312995	0.261283	1.10231	1.0167	0.653999	0.621576	1.14873	0.949513	0.830576	0.931556	1.35191	1.04543	1.08896	0.836406		0.692646	0.922338	0.826579	0.773299	0.834782	0.950424	1.12158	0.768077
580	Q9Y679	AUP1	Ancient ubiquitous protein 1 OS=Homo sapiens OX=9606 GN=AUP1 PE=1 SV=2			3	234.064	184.485	223.432	246.755	789.59	908.868	617.316	625.569	1076.94	926.495	823.669	979.828	867.872	846.947	1006.61	754.598		0.315401	0.248593	0.301074	0.332502	1.06397	1.2247	0.831832	0.842953	1.45117	1.24845	1.10989	1.32032	1.16946	1.14126	1.3564	1.01682		0.788182	1.15106	0.860303	0.975889	1.10439	1.01337	1.18959	0.749643
581	O14965	AURKA	Aurora kinase A OS=Homo sapiens OX=9606 GN=AURKA PE=1 SV=2			4	150.383	166.055	185.934	206.963	474.905	1162.38	411.878	608.154	1078.25	1149.34	681.089	1145	964.549	1221.44	862.461	1038.25		0.225454	0.24895	0.278753	0.310279	0.711978	1.74264	0.617488	0.911745	1.61651	1.72309	1.02109	1.71659	1.44605	1.83118	1.293	1.55655		1.10421	2.44761	1.06593	1.26633	1.1131	1.47654	1.68113	1.20382
582	Q96GD4	AURKB	Aurora kinase B OS=Homo sapiens OX=9606 GN=AURKB PE=1 SV=3			3	28.7501	24.0275	42.961	42.4225	79.4163	94.2789	74.086	65.634	104.577	90.8668	95.5255	104	114.563	92.2114	120.003	93.5811		0.351354	0.293639	0.525025	0.518444	0.970544	1.15218	0.905402	0.802111	1.27803	1.11048	1.16741	1.27098	1.40007	1.12691	1.46655	1.14365		0.835736	1.18715	0.868899	0.804897	0.987465	0.885916	1.08871	0.779823
583	Q9NQS1	AVEN	Cell death regulator Aven OS=Homo sapiens OX=9606 GN=AVEN PE=1 SV=1			1	26.0802	17.3404	35.6363	26.4251	71.5311	63.5424	79.1288	56.3019	89.1711	70.3529	97.6335	92.8937	106.821	58.0486	123.062	86.847		0.355312	0.236242	0.485503	0.360011	0.974527	0.86569	1.07804	0.767047	1.21485	0.958475	1.33014	1.26557	1.45531	0.790844	1.67657	1.18319		0.664888	0.888319	0.788965	0.543419	0.741522	0.711522	0.951453	0.705717
584	Q8NBF6	AVL9	Late secretory pathway protein AVL9 homolog OS=Homo sapiens OX=9606 GN=AVL9 PE=1 SV=1			1	13.9775	11.8624	14.0319	16.1886	53.607	45.4786	47.8893	49.7232	64.2289	51.8472	59.0906	59.8865	62.8376	44.5579	81.4044	60.943		0.287232	0.243768	0.28835	0.332669	1.1016	0.934567	0.984106	1.02179	1.31988	1.06544	1.21429	1.23064	1.29129	0.915647	1.67283	1.25235		0.848678	0.848371	0.807225	0.709096	1.1537	1.03829	1.01347	0.748645
585	O15169	AXIN1	Axin-1 OS=Homo sapiens OX=9606 GN=AXIN1 PE=1 SV=2			1	15.2909	13.4568	47.0908	25.9566	46.6176	44.1789	48.0063	53.4956	42.4516	39.1882	45.0152	54.8895	44.5252	38.3785	59.8886	57.9964		0.41081	0.361535	1.26516	0.697358	1.25244	1.18692	1.28975	1.43723	1.14052	1.05284	1.20939	1.47468	1.19623	1.03109	1.60899	1.55815		0.880053	0.947687	0.923127	0.86195	0.551203	1.11435	1.21935	0.968405
586	Q9H6S1	AZI2	5-azacytidine-induced protein 2 OS=Homo sapiens OX=9606 GN=AZI2 PE=1 SV=1			2	16.8986	8.13327	31.2767	35.7972	58.796	79.3204	69.8623	78.5927	53.6354	53.14	83.3597	108.805	65.5603	72.1992	90.3717	100.352		0.346833	0.16693	0.641934	0.734715	1.20675	1.628	1.43388	1.61307	1.10083	1.09066	1.71091	2.23315	1.34558	1.48184	1.85482	2.05966		0.481298	1.34908	0.990764	1.10126	1.14453	1.12497	1.30525	1.11044
587	P61769	B2M	Beta-2-microglobulin OS=Homo sapiens OX=9606 GN=B2M PE=1 SV=1			2	69.1176	42.1831	147.672	251.871	136.138	280.603	396.014	166.586	1322.39	683.283	763.02	1914.4	965.336	771.994	735.476	969.265		0.110899	0.067683	0.23694	0.404128	0.218434	0.450229	0.635406	0.267288	2.12178	1.09633	1.22427	3.07166	1.54889	1.23867	1.18007	1.55519		0.610309	2.06117	0.516703	0.799715	1.70561	0.420657	2.50898	1.31787
588	Q96L58	B3GALT6	Beta-1,3-galactosyltransferase 6 OS=Homo sapiens OX=9606 GN=B3GALT6 PE=1 SV=2			3	103.056	100.761	110.013	101.33	230.147	289.771	193.459	163.697	258.655	254.413	194.35	301.301	329.945	250.681	235.149	252.955		0.447193	0.437234	0.477382	0.439703	0.998682	1.25741	0.839481	0.710334	1.12239	1.10398	0.843347	1.30744	1.43174	1.08779	1.02039	1.09765		0.977731	1.25907	0.9836	0.759766	0.921073	0.846159	1.5503	1.07572
589	O94766	B3GAT3	Galactosylgalactosylxylosylprotein 3-beta-glucuronosyltransferase 3 OS=Homo sapiens OX=9606 GN=B3GAT3 PE=1 SV=2			3	193.244	211.351	260.9	295.851	408.54	571.813	576.448	439.063	836.423	509.128	700.394	1334.24	1065.2	583.394	727.497	701.909		0.30877	0.337701	0.416872	0.472717	0.652774	0.913656	0.921062	0.701545	1.33646	0.813496	1.11911	2.13188	1.702	0.93216	1.16241	1.12153		1.0937	1.39965	0.608697	0.547685	1.13396	0.76167	1.90498	0.964827
590	Q9NY97	B3GNT2	N-acetyllactosaminide beta-1,3-N-acetylglucosaminyltransferase 2 OS=Homo sapiens OX=9606 GN=B3GNT2 PE=1 SV=2			1	28.4517	17.3614	58.6178	64.1222	67.4406	76.8627	91.8446	65.676	134.12	82.1321	124.338	149.644	154.362	92.9546	108.339	110.492		0.296083	0.180672	0.610007	0.667289	0.701822	0.799873	0.955783	0.683459	1.39572	0.85471	1.29393	1.55727	1.60637	0.967334	1.12743	1.14984		0.610206	1.13971	0.612378	0.602186	1.0939	0.715077	1.20353	1.01987
591	Q6L9W6	B4GALNT3	Beta-1,4-N-acetylgalactosaminyltransferase 3 OS=Homo sapiens OX=9606 GN=B4GALNT3 PE=1 SV=2			1	41.0406	44.253	74.9856	60.3605	139.39	138.228	135.1	137.597	137.595	124.967	157.958	177.309	167.463	123.72	187.063	169.934		0.338139	0.364606	0.617816	0.497318	1.14845	1.13888	1.11311	1.13368	1.13366	1.02962	1.30144	1.46087	1.37975	1.01934	1.54123	1.40011		1.07827	0.991664	0.908223	0.73879	0.804961	1.01848	1.12251	0.908432
592	P15291	B4GALT1	Beta-1,4-galactosyltransferase 1 OS=Homo sapiens OX=9606 GN=B4GALT1 PE=1 SV=5			1	7.12343	4.53903	5.17826	6.19005	9.40143	19.0194	22.951	8.16451	44.6529	13.494	17.9493	51.4634	72.1395	25.4407	22.0948	23.4618		0.213729	0.136187	0.155367	0.185724	0.282077	0.570651	0.688613	0.244965	1.33975	0.404869	0.538544	1.54409	2.16445	0.763313	0.662924	0.703939		0.637197	2.02303	0.302198	0.35266	1.19539	0.355737	2.86715	1.06187
593	O60512	B4GALT3	Beta-1,4-galactosyltransferase 3 OS=Homo sapiens OX=9606 GN=B4GALT3 PE=1 SV=2			1	7.87093	9.5652	16.0981	18.6504	23.1227	26.9081	33.0493	19.6062	49.4998	24.5939	38.3827	68.8746	64.2079	31.9549	39.4213	30.8358		0.217577	0.264412	0.445002	0.515556	0.639184	0.743825	0.913587	0.541977	1.36833	0.679853	1.06102	1.90391	1.77491	0.883334	1.08973	0.852399		1.21526	1.16371	0.496848	0.497679	1.15855	0.593241	1.79442	0.782212
594	O43286	B4GALT5	Beta-1,4-galactosyltransferase 5 OS=Homo sapiens OX=9606 GN=B4GALT5 PE=1 SV=1			1	16.0128	15.4861	80.6259	55.0687	57.6794	59.8695	66.4199	57.3627	71.0147	58.0543	85.3354	83.3331	81.6442	55.115	80.9883	73.0745		0.282973	0.273665	1.42479	0.973155	1.01929	1.05799	1.17375	1.01369	1.25495	1.02592	1.50802	1.47263	1.44279	0.973974	1.4312	1.29135		0.967108	1.03797	0.817497	0.675063	0.683015	0.863637	0.976536	0.902285
595	Q9UBV7	B4GALT7	Beta-1,4-galactosyltransferase 7 OS=Homo sapiens OX=9606 GN=B4GALT7 PE=1 SV=1			2	135.97	135.931	236.078	215.862	340.52	405.238	392.031	319.847	511.08	379.476	430.223	683.181	622.741	410.073	544.135	493.835		0.337748	0.337652	0.586416	0.5362	0.845849	1.00661	0.973802	0.794497	1.26952	0.942615	1.06867	1.69702	1.54688	1.01862	1.35163	1.22668		0.999713	1.19006	0.742498	0.658497	0.914367	0.815872	1.58797	0.90756
596	O43505	B4GAT1	Beta-1,4-glucuronyltransferase 1 OS=Homo sapiens OX=9606 GN=B4GAT1 PE=1 SV=1			1	5.61283	4.86026	8.7067	5.08984	17.7817	21.4362	17.9563	16.8285	37.607	24.0903	27.7352	47.1274	34.6507	23.6092	27.1694	26.83		0.234718	0.203247	0.364098	0.212848	0.743598	0.896422	0.750899	0.703737	1.57266	1.00741	1.15983	1.97078	1.44903	0.987293	1.13617	1.12198		0.86592	1.20552	0.64058	0.681348	0.584589	0.937192	1.69919	0.987508
597	Q9UPM9	B9D1	B9 domain-containing protein 1 OS=Homo sapiens OX=9606 GN=B9D1 PE=1 SV=1			3	166.229	118.528	290.599	319.89	464.131	620.346	674.133	623.031	854.069	661.782	811.812	1166.39	762.887	660.578	909.942	867.437		0.295871	0.210968	0.517237	0.569373	0.826107	1.10415	1.19989	1.10893	1.52016	1.17791	1.44494	2.07606	1.35786	1.17576	1.61961	1.54395		0.71304	1.33658	0.774858	0.865892	1.1008	0.924196	1.43677	0.953288
598	Q9BPU9	B9D2	B9 domain-containing protein 2 OS=Homo sapiens OX=9606 GN=B9D2 PE=1 SV=2			1	31.3727	27.7481	55.9149	61.9829	96.8412	129.306	143.328	128.033	180.926	127.431	142.47	256.021	156.078	126.541	166.435	172.961		0.269746	0.238582	0.480763	0.532937	0.832652	1.11179	1.23235	1.10084	1.55562	1.09567	1.22497	2.2013	1.34198	1.08801	1.43103	1.48714		0.884466	1.33524	0.704327	0.810755	1.10852	0.893287	1.79702	1.03921
599	Q9NWV8	BABAM1	BRISC and BRCA1-A complex member 1 OS=Homo sapiens OX=9606 GN=BABAM1 PE=1 SV=1			1	5.5385	3.30421	5.9268	4.79161	19.2837	16.1888	14.0412	12.826	21.1563	20.4769	17.552	18.4537	18.3297	14.4503	23.3054	18.5051		0.344497	0.205523	0.36865	0.29804	1.19946	1.00695	0.873369	0.797783	1.31593	1.27367	1.09174	1.14783	1.14012	0.898815	1.44961	1.15103		0.596589	0.839507	0.967887	0.788354	0.808465	0.913455	1.05137	0.794026
600	Q9NXR7	BABAM2	BRISC and BRCA1-A complex member 2 OS=Homo sapiens OX=9606 GN=BABAM2 PE=1 SV=2			1	51.7404	52.9743	79.9383	84.014	240.049	246.54	241.458	257.848	311.572	254.257	345.456	378.034	272.977	255.051	392.618	346.386		0.236166	0.241798	0.364874	0.383477	1.09569	1.12532	1.10212	1.17693	1.42215	1.16054	1.57682	1.72552	1.24599	1.16417	1.79208	1.58106		1.02385	1.02704	0.816046	0.934331	1.05099	1.06788	1.0943	0.882247
601	P56817	BACE1	Beta-secretase 1 OS=Homo sapiens OX=9606 GN=BACE1 PE=1 SV=3			1	7.79414	10.5184	40.4013	23.2871	16.9693	24.505	29.9135	26.2176	41.3332	24.6454	43.2024	55.3266	40.1528	30.9202	68.434	47.2471		0.293428	0.395989	1.521	0.876695	0.638848	0.922546	1.12616	0.987021	1.55608	0.927832	1.62645	2.08289	1.51164	1.16406	2.57635	1.77872		1.34953	1.44408	0.596262	0.770063	0.576395	0.876447	1.28064	0.690404
602	O14867	BACH1	Transcription regulator protein BACH1 OS=Homo sapiens OX=9606 GN=BACH1 PE=1 SV=2			1	28.3924	27.6756	35.4911	24.2286	100.609	106.636	81.627	80.1041	93.7833	87.0548	117.087	117.126	124.244	90.6305	131.998	103.121		0.327263	0.319001	0.409085	0.279269	1.15966	1.22913	0.940867	0.923314	1.08099	1.00343	1.34959	1.35004	1.43209	1.04465	1.52146	1.18862		0.974754	1.05991	0.928255	0.729456	0.682667	0.981343	1.00033	0.781232
603	Q9BYV9	BACH2	Transcription regulator protein BACH2 OS=Homo sapiens OX=9606 GN=BACH2 PE=1 SV=1			1	70.288	73.8345	86.9121	75.3262	223.861	234.629	171.032	156.281	212.065	185.299	206.014	203.994	265.801	199.451	248.271	205.1		0.364179	0.382555	0.450313	0.390284	1.15988	1.21567	0.886159	0.80973	1.09876	0.96008	1.06741	1.05694	1.37718	1.0334	1.28635	1.06267		1.05046	1.0481	0.873784	0.750377	0.866694	0.913753	0.990195	0.826113
604	O95816	BAG2	BAG family molecular chaperone regulator 2 OS=Homo sapiens OX=9606 GN=BAG2 PE=1 SV=1			10	277.798	276.928	258.142	373.142	1026.87	1337.18	858.495	1013.85	1431.19	1543.92	1004.09	1680.38	916.089	1221.49	1258.26	1437		0.304274	0.303321	0.282745	0.408705	1.12474	1.46462	0.940315	1.11048	1.56759	1.69107	1.09979	1.84053	1.0034	1.33791	1.37818	1.57395		0.996868	1.30219	1.07877	1.33337	1.44549	1.18096	1.67354	1.14205
605	O95817	BAG3	BAG family molecular chaperone regulator 3 OS=Homo sapiens OX=9606 GN=BAG3 PE=1 SV=3			2	61.923	70.1823	120.152	107.712	131.454	175.422	143.993	102.156	322.865	217.409	162.687	224.349	235.679	199.829	160.572	160.627		0.329412	0.373349	0.639174	0.572996	0.699297	0.933194	0.766001	0.54344	1.71755	1.15655	0.865447	1.19347	1.25374	1.06303	0.854196	0.854489		1.13338	1.33447	0.673374	0.847886	0.896464	0.709451	1.37902	1.00034
606	O95429	BAG4	BAG family molecular chaperone regulator 4 OS=Homo sapiens OX=9606 GN=BAG4 PE=1 SV=1			3	16.7938	11.7014	23.9324	17.0694	58.7028	54.4466	41.9631	43.2449	131.971	78.4276	76.6849	86.8622	90.2685	66.4724	90.5031	62.6577		0.22562	0.157205	0.321525	0.229323	0.788655	0.731475	0.563762	0.580983	1.77299	1.05365	1.03024	1.16697	1.21273	0.893038	1.21588	0.841788		0.696769	0.927496	0.594279	0.736385	0.713234	1.03055	1.13272	0.692327
607	P46379	BAG6	Large proline-rich protein BAG6 OS=Homo sapiens OX=9606 GN=BAG6 PE=1 SV=2			6	216.348	217.202	389.9	314.783	624.268	694.775	677.426	545.755	780.302	696.154	789.815	714.22	757.14	648.83	913.836	670.561		0.363907	0.365343	0.655829	0.529479	1.05005	1.16864	1.13946	0.917984	1.3125	1.17096	1.3285	1.20135	1.27354	1.09136	1.53711	1.12791		1.00395	1.11294	0.89216	0.856949	0.807343	0.80563	0.904288	0.733787
608	Q9P281	BAHCC1	BAH and coiled-coil domain-containing protein 1 OS=Homo sapiens OX=9606 GN=BAHCC1 PE=1 SV=4			2	53.6922	40.2762	87.7171	67.2056	94.1128	110.405	109.073	81.2068	161.928	101.196	129.23	118.26	183.128	115.642	178.81	141.218		0.435759	0.326877	0.711901	0.545432	0.763808	0.896034	0.885223	0.659065	1.31419	0.821294	1.04881	0.959784	1.48624	0.938536	1.4512	1.14611		0.750131	1.17311	0.624944	0.631482	0.766163	0.744518	0.915113	0.789766
609	Q8TBE0	BAHD1	Bromo adjacent homology domain-containing 1 protein OS=Homo sapiens OX=9606 GN=BAHD1 PE=1 SV=2			2	29.3757	22.1952	34.6265	34.3547	70.0277	57.5981	54.7842	50.2765	64.3052	53.0195	52.7266	68.682	108.097	75.8854	82.9028	74.1116		0.432305	0.326633	0.509577	0.505578	1.03056	0.847637	0.806226	0.739889	0.946341	0.780256	0.775946	1.01075	1.5908	1.11676	1.22003	1.09066		0.755563	0.822505	0.824498	0.702012	0.992151	0.917719	1.30261	0.893958
610	Q9UQB8	BAIAP2	Brain-specific angiogenesis inhibitor 1-associated protein 2 OS=Homo sapiens OX=9606 GN=BAIAP2 PE=1 SV=1			3	214.69	243.779	305.09	308.997	603.092	1050.43	604.889	578.091	1320.77	1312.74	725.7	1076.51	928.337	962.181	752.551	898.183		0.28001	0.31795	0.397915	0.40301	0.786585	1.37003	0.788928	0.753977	1.72262	1.71215	0.946497	1.40404	1.21079	1.25493	0.981517	1.17146		1.13549	1.74174	0.99392	1.03646	1.01281	0.955698	1.48341	1.19352
611	Q9UHR4	BAIAP2L1	Brain-specific angiogenesis inhibitor 1-associated protein 2-like protein 1 OS=Homo sapiens OX=9606 GN=BAIAP2L1 PE=1 SV=2			8	122.265	101.91	156.465	135.456	487.069	487.744	415.246	409.623	508.9	420.858	475.371	521.115	584.793	455.105	629.133	568.623		0.287171	0.239362	0.367499	0.318153	1.14401	1.14559	0.975313	0.962106	1.19528	0.988494	1.11653	1.22397	1.37354	1.06893	1.47768	1.33556		0.833517	1.00139	0.826995	0.778233	0.865727	0.986459	1.09623	0.90382
612	Q16611	BAK1	Bcl-2 homologous antagonist/killer OS=Homo sapiens OX=9606 GN=BAK1 PE=1 SV=1			2	4.67227	3.35286	16.4641	40.7716	24.0723	53.3143	102.031	29.847	138.501	65.8274	147.099	259.546	133.006	142.162	138.136	114.026		0.0622447	0.0446673	0.219337	0.543166	0.320695	0.710262	1.35927	0.397627	1.84513	0.876963	1.95968	3.45771	1.77193	1.89391	1.84027	1.51907		0.717608	2.21476	0.475285	1.06884	2.47639	0.292529	1.76443	0.825462
613	Q8N9N5	BANP	Protein BANP OS=Homo sapiens OX=9606 GN=BANP PE=1 SV=3			2	147.591	117.975	207.702	155.925	386.898	414.036	370.912	325.649	472.751	395.657	461.294	496.043	449.856	341.491	491.692	414.356		0.405165	0.323863	0.570181	0.428043	1.06211	1.13661	1.01822	0.893967	1.29779	1.08615	1.26634	1.36173	1.23494	0.937456	1.34979	1.13748		0.799337	1.07014	0.836925	0.759112	0.750715	0.877968	1.07533	0.842715
614	Q92560	BAP1	Ubiquitin carboxyl-terminal hydrolase BAP1 OS=Homo sapiens OX=9606 GN=BAP1 PE=1 SV=2			4	395.633	319.968	596.344	453.373	835.2	859.317	832.306	695.655	893.214	682.11	931.969	924	1220.78	878.466	1339.13	1046.99		0.473128	0.382642	0.713154	0.542178	0.998796	1.02764	0.995335	0.831917	1.06817	0.815719	1.11452	1.10499	1.4599	1.05054	1.60143	1.25207		0.80875	1.02888	0.763658	0.719594	0.760254	0.835816	0.991449	0.781843
615	Q8IXM2	BAP18	Chromatin complexes subunit BAP18 OS=Homo sapiens OX=9606 GN=BAP18 PE=1 SV=1			5	142.787	98.3204	200.995	166.563	347.709	286.335	349.466	280.431	447.658	216.13	392.253	360.532	515.541	307.72	577.428	398.259		0.392894	0.270539	0.55306	0.458316	0.956759	0.787882	0.961594	0.771636	1.23178	0.594705	1.07933	0.992043	1.41857	0.846725	1.58886	1.09585		0.688581	0.82349	0.482802	0.596888	0.828692	0.802456	0.919131	0.689712
616	Q99728	BARD1	BRCA1-associated RING domain protein 1 OS=Homo sapiens OX=9606 GN=BARD1 PE=1 SV=2			4	280.232	207.75	445.358	385.108	598.716	655.578	701.247	605.955	693.407	509.377	684.084	892.897	926.999	633.641	880.787	925.809		0.448487	0.332486	0.712757	0.616332	0.958193	1.0492	1.12229	0.969779	1.10974	0.815214	1.09482	1.429	1.48358	1.01409	1.40962	1.48168		0.74135	1.09497	0.7346	0.68354	0.864716	0.864111	1.30524	1.05112
617	P80723	BASP1	Brain acid soluble protein 1 OS=Homo sapiens OX=9606 GN=BASP1 PE=1 SV=2			2	32.0834	47.4651	13.5633	31.1486	139.177	335.138	129.144	78.2452	526.761	376.068	181.339	252.006	454.832	462.926	192.06	176.376		0.111318	0.164687	0.0470599	0.108075	0.482896	1.16281	0.448085	0.271484	1.82768	1.30483	0.629183	0.874373	1.57811	1.60619	0.666381	0.611963		1.47943	2.408	0.713925	1.0178	2.29654	0.605876	1.3897	0.918338
618	Q07812	BAX	Apoptosis regulator BAX OS=Homo sapiens OX=9606 GN=BAX PE=1 SV=1			2	71.3027	104.806	184.331	181.521	173.706	242.27	427.882	286.827	433.302	249.92	573.499	827.626	340.359	314.095	675.9	553.571		0.279984	0.411541	0.723811	0.712777	0.68209	0.951319	1.68016	1.12628	1.70144	0.981358	2.25195	3.24983	1.33648	1.23335	2.65405	2.1737		1.46987	1.39471	0.57678	0.922834	0.984756	0.670341	1.44312	0.819013
619	Q9NRL2	BAZ1A	Bromodomain adjacent to zinc finger domain protein 1A OS=Homo sapiens OX=9606 GN=BAZ1A PE=1 SV=2			6	316.523	167.128	385.726	265.895	612.017	526.326	609.026	388.201	495.443	388.244	552.097	469.406	1194.66	567.736	851.104	622.78		0.483492	0.255289	0.5892	0.406157	0.934861	0.803968	0.930293	0.59298	0.756793	0.593046	0.843333	0.717022	1.82485	0.867222	1.30007	0.951302		0.528012	0.859986	0.78363	0.475228	0.689336	0.637413	0.850224	0.731732
620	Q9UIG0	BAZ1B	Tyrosine-protein kinase BAZ1B OS=Homo sapiens OX=9606 GN=BAZ1B PE=1 SV=2			7	298.052	172.769	416.728	304.981	529.968	449.983	659.848	458.411	514.618	364.544	626.46	645.101	884.747	446.227	834.028	699.104		0.53525	0.310263	0.748372	0.547693	0.951731	0.808092	1.18497	0.823227	0.924165	0.654658	1.12501	1.15849	1.58885	0.801347	1.49777	1.25547		0.579661	0.849076	0.708378	0.504355	0.731847	0.694722	1.02976	0.838226
621	Q9UIF9	BAZ2A	Bromodomain adjacent to zinc finger domain protein 2A OS=Homo sapiens OX=9606 GN=BAZ2A PE=1 SV=4			3	59.0269	34.9824	85.8417	57.3892	144.397	122.237	134.009	84.3997	134.981	86.2392	152.414	116.52	259.034	106.539	235.088	111.389		0.3952	0.234216	0.574731	0.384235	0.966773	0.818407	0.897223	0.565077	0.903731	0.577393	1.02045	0.78013	1.7343	0.713305	1.57397	0.745777		0.592652	0.846534	0.638899	0.411293	0.668547	0.629806	0.764497	0.473818
622	Q9BXH1	BBC3	Bcl-2-binding component 3 OS=Homo sapiens OX=9606 GN=BBC3 PE=1 SV=1			1	15.4974	18.3378	34.7465	51.7098	62.5314	82.891	151.419	83.3433	200.297	113.017	251.255	390.843	186.813	146.743	247.507	194.037		0.133271	0.157697	0.298805	0.444683	0.537744	0.712828	1.30214	0.716718	1.72247	0.971899	2.16069	3.36109	1.60651	1.26193	2.12846	1.66864		1.18328	1.32559	0.564247	0.785507	1.4882	0.550415	1.55556	0.783966
623	Q8NFJ9	BBS1	Bardet-Biedl syndrome 1 protein OS=Homo sapiens OX=9606 GN=BBS1 PE=1 SV=1			5	159.205	116.627	277.662	224.097	540.784	536.071	638.394	559.348	584.362	489.305	757.579	915.254	593.411	462.906	846.08	881.207		0.339138	0.248438	0.591474	0.47737	1.15198	1.14194	1.3599	1.19152	1.24481	1.04232	1.61379	1.94967	1.26408	0.98608	1.80232	1.87714		0.732559	0.991285	0.837332	0.780077	0.807086	0.87618	1.20813	1.04152
624	Q9BXC9	BBS2	Bardet-Biedl syndrome 2 protein OS=Homo sapiens OX=9606 GN=BBS2 PE=1 SV=1			4	140.634	118.545	243.336	203.02	398.946	380.571	446.882	426.691	392.768	301.501	458.712	511.057	452.521	317.582	625.715	551.398		0.406202	0.342401	0.702842	0.586395	1.1523	1.09923	1.29076	1.23244	1.13446	0.870843	1.32493	1.47612	1.30704	0.917291	1.80729	1.59264		0.842933	0.953941	0.767631	0.701806	0.83432	0.954818	1.11411	0.881229
625	Q96RK4	BBS4	Bardet-Biedl syndrome 4 protein OS=Homo sapiens OX=9606 GN=BBS4 PE=1 SV=2			4	111.28	105.831	182.797	169.327	307.079	363.959	379.899	360.654	327.052	316.829	410.849	528.308	337.673	310.843	530.279	492.123		0.410975	0.390851	0.675098	0.625351	1.13409	1.34416	1.40303	1.33195	1.20785	1.1701	1.51733	1.95112	1.24708	1.14799	1.9584	1.81749		0.951033	1.18523	0.968742	0.920544	0.926312	0.949342	1.28589	0.928045
626	Q8N3I7	BBS5	Bardet-Biedl syndrome 5 protein OS=Homo sapiens OX=9606 GN=BBS5 PE=1 SV=1			2	23.1353	16.4758	34.1173	30.9537	73.4531	74.021	86.7107	88.0797	86.754	70.6842	81.087	99.5061	84.6549	65.7624	109.898	126.946		0.345306	0.24591	0.509219	0.462	1.09633	1.1048	1.2942	1.31464	1.29485	1.055	1.21027	1.48518	1.26352	0.981538	1.64029	1.89474		0.71215	1.00773	0.814766	0.776829	0.907273	1.01579	1.22715	1.15513
627	Q8IWZ6	BBS7	Bardet-Biedl syndrome 7 protein OS=Homo sapiens OX=9606 GN=BBS7 PE=1 SV=2			2	39.4304	23.3267	67.0431	47.9901	103.441	114.89	91.1055	102.171	117.631	106.439	109.713	145.607	113.223	68.3919	128.043	159.296		0.422025	0.249667	0.717565	0.51364	1.10713	1.22967	0.975106	1.09354	1.25901	1.13922	1.17426	1.55844	1.21183	0.732002	1.37045	1.70495		0.591592	1.11068	0.904855	0.604046	0.71581	1.12146	1.32716	1.24408
628	Q3SYG4	BBS9	Protein PTHB1 OS=Homo sapiens OX=9606 GN=BBS9 PE=1 SV=1			3	105.42	91.9292	99.9123	99.644	202.979	245.797	184.912	201.553	323.977	289.645	298.746	343.177	319.957	275.572	377.062	289.203		0.442786	0.386122	0.419653	0.418526	0.852555	1.0324	0.77667	0.846565	1.36077	1.21657	1.2548	1.44142	1.34389	1.15746	1.58374	1.21471		0.872028	1.21095	0.89403	0.861278	0.997315	1.08999	1.14873	0.766991
629	Q8WY36	BBX	HMG box transcription factor BBX OS=Homo sapiens OX=9606 GN=BBX PE=1 SV=1			4	395.506	286.691	632.27	465.07	674.126	735.369	809.844	652.225	821.464	662.571	904.124	868.635	1193.86	714.716	1242.4	1016		0.512819	0.371728	0.819811	0.603017	0.874082	0.95349	1.05006	0.845685	1.06512	0.859099	1.1723	1.12629	1.54798	0.926711	1.61091	1.31736		0.724871	1.09085	0.806573	0.59866	0.735556	0.805371	0.960748	0.817772
630	P50895	BCAM	Basal cell adhesion molecule OS=Homo sapiens OX=9606 GN=BCAM PE=1 SV=2			2	16.1034	12.5164	41.8408	83.4867	45.9059	84.2553	142.684	71.3019	263.859	160.156	263.418	427.101	276.829	218.826	252.441	242.022		0.106876	0.0830692	0.27769	0.554087	0.30467	0.559188	0.94697	0.473219	1.75119	1.06293	1.74826	2.8346	1.83727	1.45231	1.67541	1.60626		0.777252	1.83539	0.606976	0.790474	1.99534	0.499719	1.62138	0.958727
631	P51572	BCAP31	B-cell receptor-associated protein 31 OS=Homo sapiens OX=9606 GN=BCAP31 PE=1 SV=3			5	621.144	665.785	424.385	528.68	1122.81	1281.34	1094.15	938.718	5194.63	2716.7	2663.52	4851.54	1240.36	2338.58	3526.23	2163.16		0.303777	0.325609	0.20755	0.258557	0.549122	0.626653	0.535106	0.45909	2.54049	1.32863	1.30262	2.3727	0.606611	1.14371	1.72454	1.05792		1.07187	1.14119	0.522982	1.8854	1.24576	0.857943	1.82148	0.613448
632	P56945	BCAR1	Breast cancer anti-estrogen resistance protein 1 OS=Homo sapiens OX=9606 GN=BCAR1 PE=1 SV=2			7	190.411	186.366	305.721	307.814	746.582	813.275	787.734	790.924	875.271	714.632	1101.89	1249.59	844.387	708.72	1177.43	988.275		0.286693	0.280603	0.46031	0.463462	1.12409	1.22451	1.18606	1.19086	1.31786	1.07599	1.65907	1.88145	1.27136	1.06709	1.7728	1.488		0.978756	1.08933	0.816469	0.839331	1.00685	1.00405	1.13404	0.839349
633	O75934	BCAS2	Pre-mRNA-splicing factor SPF27 OS=Homo sapiens OX=9606 GN=BCAS2 PE=1 SV=1			7	1400.65	1431.9	1905.63	1824.21	2863.42	3801.15	3043.54	2796.06	3576.21	3838.29	3360.2	4306.18	4202.23	3945.89	4813.43	4256.5		0.465235	0.475615	0.632968	0.605924	0.951104	1.26258	1.01093	0.92873	1.18786	1.27491	1.11611	1.43033	1.3958	1.31065	1.59881	1.41382		1.02231	1.32749	1.07328	0.938999	0.957274	0.918687	1.28152	0.884297
634	Q9H6U6	BCAS3	Breast carcinoma-amplified sequence 3 OS=Homo sapiens OX=9606 GN=BCAS3 PE=1 SV=3			3	25.8949	30.76	34.4469	42.6081	78.9522	111.163	69.6605	74.8998	81.2205	92.2901	85.1389	106.43	70.8432	64.4008	94.7231	100.086		0.403173	0.478921	0.536325	0.663391	1.22925	1.73076	1.08459	1.16616	1.26457	1.43692	1.32558	1.65707	1.103	1.0027	1.4748	1.5583		1.18788	1.40798	1.13629	0.909061	1.23692	1.07521	1.25007	1.05662
635	P54687	BCAT1	Branched-chain-amino-acid aminotransferase, cytosolic OS=Homo sapiens OX=9606 GN=BCAT1 PE=1 SV=3			2	90.504	77.3669	143.309	110.856	216.101	229.37	233.231	191.562	246.541	200.484	286.075	386.096	237.299	191.161	223.736	241.325		0.45799	0.391511	0.725207	0.56098	1.09357	1.16071	1.18025	0.969388	1.24761	1.01454	1.44767	1.95382	1.20084	0.967359	1.1322	1.22121		0.854845	1.0614	0.813187	0.80557	0.773545	0.82134	1.34963	1.07861
636	O15382	BCAT2	Branched-chain-amino-acid aminotransferase, mitochondrial OS=Homo sapiens OX=9606 GN=BCAT2 PE=1 SV=2			3	257.842	198.639	359.402	307.325	592.756	626.745	653.923	455.308	815.966	583.122	667.191	926.255	670.086	524.763	604.458	595.731		0.441387	0.340041	0.615243	0.526095	1.01471	1.07289	1.11942	0.77942	1.39681	0.998219	1.14213	1.58561	1.14709	0.898317	1.03474	1.0198		0.77039	1.05734	0.71464	0.783128	0.855101	0.696272	1.38829	0.985562
637	Q9P287	BCCIP	BRCA2 and CDKN1A-interacting protein OS=Homo sapiens OX=9606 GN=BCCIP PE=1 SV=1			2	327.751	292.396	252.603	268.886	1155.39	1324.48	581.275	654.761	1446.23	1361.1	767.153	1061.21	1357.61	1273.2	896.658	982.384		0.305811	0.272822	0.235693	0.250886	1.07805	1.23582	0.542363	0.61093	1.34942	1.26998	0.715798	0.99017	1.26673	1.18797	0.836634	0.916621		0.892128	1.14635	0.941137	0.937825	1.06446	1.12642	1.38331	1.09561
638	P12694	BCKDHA	2-oxoisovalerate dehydrogenase subunit alpha, mitochondrial OS=Homo sapiens OX=9606 GN=BCKDHA PE=1 SV=2			3	137.874	95.3051	181.16	154.613	465.101	494.744	680.691	460.466	662.373	470.835	807.174	1070.09	602.599	384.822	696.321	720.53		0.295242	0.204085	0.387934	0.331086	0.995962	1.05944	1.45762	0.986037	1.4184	1.00824	1.72847	2.29148	1.2904	0.824053	1.49109	1.54293		0.691248	1.06373	0.710831	0.638604	0.853461	0.676468	1.32572	1.03477
639	O14874	BCKDK	[3-methyl-2-oxobutanoate dehydrogenase [lipoamide]] kinase, mitochondrial OS=Homo sapiens OX=9606 GN=BCKDK PE=1 SV=2			2	26.1686	40.5479	28.4379	34.2547	68.7012	136.16	50.424	92.8038	98.1113	134.907	105.144	106.959	88.7649	97.2713	126.919	85.7773		0.37152	0.575666	0.403738	0.48632	0.975364	1.93309	0.715879	1.31755	1.3929	1.9153	1.49275	1.51852	1.26021	1.38098	1.80189	1.2178		1.54949	1.98192	1.37504	1.09583	1.20454	1.84047	1.01726	0.675843
640	O95999	BCL10	B-cell lymphoma/leukemia 10 OS=Homo sapiens OX=9606 GN=BCL10 PE=1 SV=1			1	28.2314	32.5863	51.2763	41.8136	85.024	92.9135	93.886	91.9803	114.759	78.4065	112.336	147.316	104.233	87.0568	103.491	109.194		0.339884	0.392314	0.617327	0.503403	1.02362	1.11861	1.13031	1.10737	1.38161	0.943953	1.35244	1.77357	1.25488	1.0481	1.24595	1.31461		1.15426	1.09279	0.683227	0.835213	0.815457	0.979702	1.31139	1.05511
641	Q9H165	BCL11A	B-cell lymphoma/leukemia 11A OS=Homo sapiens OX=9606 GN=BCL11A PE=1 SV=2			1	13.2835	11.4976	16.9554	12.3204	24.6991	32.4763	26.12	31.5776	30.479	32.3387	32.2709	43.9912	44.8299	23.6089	48.8887	44.378		0.469003	0.405947	0.598647	0.434998	0.872055	1.14665	0.922223	1.11492	1.07613	1.14179	1.13939	1.5532	1.58282	0.833563	1.72612	1.56686		0.865555	1.31488	1.06102	0.526633	0.726636	1.20894	1.36318	0.907735
642	Q9C0K0	BCL11B	B-cell lymphoma/leukemia 11B OS=Homo sapiens OX=9606 GN=BCL11B PE=1 SV=1			1	37.7893	24.9955	30.0548	32.6133	93.8245	87.914	73.1129	59.6379	129.837	101.301	85.3728	101.558	101.038	75.8066	82.3274	88.5896		0.416998	0.275821	0.331649	0.359882	1.03534	0.970115	0.806788	0.658094	1.43273	1.11784	0.942074	1.12067	1.11494	0.836512	0.908468	0.977571		0.661444	0.937005	0.780217	0.750278	1.08513	0.815696	1.18958	1.07606
643	Q9HB09	BCL2L12	Bcl-2-like protein 12 OS=Homo sapiens OX=9606 GN=BCL2L12 PE=1 SV=1			1	4.78918	3.83293	24.0706	21.7809	23.6664	29.9722	33.2798	21.5085	38.9394	26.3733	43.1855	61.9716	43.0302	32.3681	44.9656	48.7205		0.173481	0.138843	0.871924	0.788983	0.857283	1.0857	1.20551	0.779116	1.41053	0.955336	1.56434	2.24484	1.55871	1.17249	1.62882	1.76483		0.800331	1.26645	0.677291	0.752218	0.904876	0.646293	1.43501	1.08351
644	Q9BXK5	BCL2L13	Bcl-2-like protein 13 OS=Homo sapiens OX=9606 GN=BCL2L13 PE=1 SV=1			5	59.4244	54.2949	123.367	210.304	142.595	234.682	601.097	221.439	591.593	268.378	783.421	1238.09	778.699	531.758	559.687	612.26		0.151177	0.138128	0.313849	0.535019	0.362765	0.597037	1.52921	0.563346	1.50503	0.68276	1.99304	3.14973	1.98103	1.35281	1.42386	1.5576		0.91368	1.64579	0.453653	0.68288	1.7047	0.368391	1.58036	1.09393
645	Q4VC05	BCL7A	B-cell CLL/lymphoma 7 protein family member A OS=Homo sapiens OX=9606 GN=BCL7A PE=1 SV=1			3	483.065	367.621	564.35	421.805	1442.33	1401.36	1005.33	964.646	1543.41	1200.02	1036.38	1149.01	1875.61	1298.82	1432.44	1286.36		0.361548	0.275144	0.422385	0.315698	1.0795	1.04884	0.752434	0.721984	1.15516	0.898149	0.775673	0.859971	1.40379	0.972095	1.0721	0.96277		0.761018	0.971595	0.777512	0.692479	0.747417	0.959532	1.10868	0.89802
646	Q9BQE9	BCL7B	B-cell CLL/lymphoma 7 protein family member B OS=Homo sapiens OX=9606 GN=BCL7B PE=1 SV=1			4	187.27	187.272	271.167	223.019	490.916	472.007	412.074	347.811	408.898	318.561	419.626	407.475	758.585	519.672	717.526	479.937		0.405858	0.405863	0.587683	0.483335	1.06393	1.02295	0.893062	0.753788	0.886178	0.690397	0.909429	0.883094	1.64403	1.12625	1.55505	1.04014		1.00001	0.961482	0.779072	0.685054	0.822442	0.84405	0.971043	0.668878
647	Q8WUZ0	BCL7C	B-cell CLL/lymphoma 7 protein family member C OS=Homo sapiens OX=9606 GN=BCL7C PE=1 SV=3			2	57.3672	46.3034	83.0005	58.8247	144.342	184.838	149.313	136.854	186.458	140.273	161.344	200.316	181.073	148.609	213.886	198.594		0.403114	0.32537	0.583237	0.413356	1.01428	1.29884	1.04921	0.961661	1.31022	0.985686	1.13375	1.4076	1.27238	1.04426	1.50296	1.3955		0.807141	1.28056	0.752303	0.820713	0.708727	0.916558	1.24155	0.928504
648	Q9NYF8	BCLAF1	Bcl-2-associated transcription factor 1 OS=Homo sapiens OX=9606 GN=BCLAF1 PE=1 SV=2			5	190.204	146.662	235.552	182.317	192.989	285.964	222.071	238.758	272.782	328.511	328.735	450.968	389.527	281.976	335.953	361.047		0.727704	0.561116	0.901202	0.697529	0.738359	1.09407	0.849624	0.913467	1.04364	1.25685	1.25771	1.72536	1.4903	1.07882	1.28533	1.38133		0.771077	1.48176	1.2043	0.723893	0.773999	1.07514	1.37183	1.07469
649	A2AJT9	BCLAF3	BCLAF1 and THRAP3 family member 3 OS=Homo sapiens OX=9606 GN=BCLAF3 PE=1 SV=1			1	42.523	24.403	71.4286	53.817	52.793	63.9053	85.4962	68.3175	46.2735	53.8765	84.4748	101.135	69.7072	36.5755	83.1411	91.7113		0.804991	0.461967	1.3522	1.01879	0.99941	1.20977	1.61851	1.2933	0.875991	1.01992	1.59917	1.91456	1.31961	0.692401	1.57392	1.73616		0.573878	1.21049	1.16431	0.524702	0.753438	0.799071	1.19722	1.10308
650	Q6W2J9	BCOR	BCL-6 corepressor OS=Homo sapiens OX=9606 GN=BCOR PE=1 SV=1			7	765.869	571.125	933.07	796.13	1644.61	1584.89	1594.3	1415.16	1484.52	1193.64	1722.37	1815.84	2421.56	1709.59	2391.66	1988.94		0.484991	0.361668	0.590872	0.504154	1.04146	1.00364	1.0096	0.896159	0.940081	0.75588	1.0907	1.14989	1.53347	1.08261	1.51453	1.25951		0.745722	0.963687	0.804058	0.705987	0.853237	0.887637	1.05427	0.831615
651	Q5H9F3	BCORL1	BCL-6 corepressor-like protein 1 OS=Homo sapiens OX=9606 GN=BCORL1 PE=1 SV=1			5	128.189	115.744	199.58	158.995	275.931	321.493	315.354	236.4	325.862	249.45	327.591	424.451	437.883	313.378	399.546	328.638		0.439054	0.396429	0.683572	0.544566	0.945078	1.10113	1.0801	0.809683	1.11609	0.85438	1.12202	1.45377	1.49977	1.07334	1.36847	1.1256		0.902917	1.16512	0.765508	0.715666	0.796648	0.749634	1.29567	0.822529
652	P11274	BCR	Breakpoint cluster region protein OS=Homo sapiens OX=9606 GN=BCR PE=1 SV=2			11	909.596	732.873	1129.45	1036.58	2475.5	2739.21	2144.26	2087.49	2638.46	2417.56	2331.9	2887.96	2857.39	2257.26	2872.33	2703.11		0.409684	0.330088	0.508707	0.466878	1.11497	1.23375	0.96578	0.940211	1.18837	1.08887	1.05029	1.30074	1.28698	1.01668	1.2937	1.21749		0.805713	1.10653	0.916277	0.789973	0.917774	0.973525	1.23846	0.941086
653	Q9Y276	BCS1L	Mitochondrial chaperone BCS1 OS=Homo sapiens OX=9606 GN=BCS1L PE=1 SV=1			4	65.8399	44.0631	137.736	123.374	165.636	211.271	371.733	168.226	510.967	174.157	467.778	1080.98	665.881	397.015	386.542	514.369		0.187002	0.12515	0.391205	0.350414	0.470449	0.600064	1.05582	0.477805	1.45128	0.49465	1.32861	3.07026	1.89127	1.12762	1.09788	1.46094		0.669246	1.27551	0.340838	0.596225	0.895728	0.452545	2.31088	1.33069
654	Q9BUT1	BDH2	3-hydroxybutyrate dehydrogenase type 2 OS=Homo sapiens OX=9606 GN=BDH2 PE=1 SV=2			1	11.0709	10.8679	13.9358	12.2998	26.5699	28.9882	33.5726	24.3762	43.7261	34.3296	38.189	65.8501	33.7514	41.1576	58.456	34.5504		0.384679	0.377625	0.484225	0.427379	0.923221	1.00725	1.16654	0.846997	1.51934	1.19285	1.32695	2.28808	1.17276	1.4301	2.03116	1.20052		0.981664	1.09102	0.785105	1.21943	0.882605	0.726074	1.72432	0.59105
655	A6H8Y1	BDP1	Transcription factor TFIIIB component B'' homolog OS=Homo sapiens OX=9606 GN=BDP1 PE=1 SV=3			8	573.52	758.897	760.293	635.016	1137.78	1037.65	1109.37	869.119	1429.62	967.243	1285.51	1331.62	1740.35	1016.76	1594.49	1235.34		0.469976	0.621885	0.623029	0.520369	0.932364	0.850311	0.909083	0.712207	1.17151	0.792616	1.05342	1.09121	1.42615	0.833193	1.30662	1.01231		1.32323	0.911995	0.676573	0.584227	0.835225	0.783435	1.03587	0.774756
656	Q14457	BECN1	Beclin-1 OS=Homo sapiens OX=9606 GN=BECN1 PE=1 SV=2			1	109.251	89.9191	142.096	121.275	395.934	385.412	339.321	357.665	388.985	339.169	411.601	384.535	468.659	361.099	577.085	453.261		0.320659	0.263919	0.417062	0.355951	1.16209	1.13121	0.995931	1.04977	1.1417	0.995485	1.20808	1.12864	1.37555	1.05985	1.69379	1.33035		0.823051	0.973425	0.871933	0.770494	0.853472	1.05406	0.934242	0.785432
657	Q5T5X7	BEND3	BEN domain-containing protein 3 OS=Homo sapiens OX=9606 GN=BEND3 PE=1 SV=1			5	178.162	124.898	205.682	201.56	341.841	425.46	319.915	308.43	354.96	412.568	312.54	444.966	405.89	336.888	377.889	472.461		0.556385	0.390046	0.642328	0.629456	1.06754	1.32868	0.999069	0.963202	1.10851	1.28842	0.976037	1.38959	1.26756	1.05207	1.18012	1.47546		0.701036	1.24461	1.16229	0.829998	0.979959	0.9641	1.42371	1.25026
658	Q7L4P6	BEND5	BEN domain-containing protein 5 OS=Homo sapiens OX=9606 GN=BEND5 PE=1 SV=1			1	34.2428	112.189	58.301	46.9702	132.12	227.28	145.206	152.661	293.677	252.253	210.176	416.111	251.461	198.023	206.25	270.014		0.19251	0.630717	0.327764	0.264063	0.742768	1.27775	0.816336	0.858248	1.65103	1.41815	1.18159	2.33934	1.41369	1.11327	1.15952	1.518		3.27628	1.72025	0.858947	0.78749	0.80565	1.05134	1.97982	1.30916
659	Q8N7W2	BEND7	BEN domain-containing protein 7 OS=Homo sapiens OX=9606 GN=BEND7 PE=1 SV=2			2	23.5394	22.0224	33.678	29.7227	52.8896	68.4863	49.2235	41.8733	71.6803	67.2688	66.4777	72.2094	80.1733	54.5576	67.1736	58.1153		0.412461	0.38588	0.590111	0.520805	0.926739	1.20003	0.862501	0.73371	1.25599	1.17869	1.16483	1.26526	1.40481	0.955966	1.17703	1.0183		0.935555	1.29489	0.938456	0.680496	0.882555	0.850677	1.08622	0.865151
660	O15155	BET1	BET1 homolog OS=Homo sapiens OX=9606 GN=BET1 PE=1 SV=1			2	72.0758	68.8931	88.5146	92.8575	156.791	243.02	242.593	167.522	796.097	402.759	407.722	923.093	319.296	334.948	573.951	362.785		0.21447	0.204999	0.263385	0.276308	0.46655	0.723134	0.721863	0.498481	2.36888	1.19846	1.21322	2.74677	0.950102	0.996676	1.70786	1.07951		0.955842	1.54996	0.505917	1.04902	1.04906	0.690548	2.26403	0.632084
661	Q9NYM9	BET1L	BET1-like protein OS=Homo sapiens OX=9606 GN=BET1L PE=1 SV=1			3	16.3342	12.9961	26.4876	16.0823	42.9285	93.5109	54.6219	47.9551	292.885	130.472	101.925	337.512	75.3291	116.883	148.164	87.9935		0.152843	0.121608	0.247851	0.150486	0.401692	0.875003	0.51111	0.448727	2.74059	1.22086	0.953736	3.15818	0.704872	1.0937	1.38641	0.823376		0.795637	2.17829	0.445472	1.55163	0.607163	0.877946	3.31138	0.593893
662	Q9H694	BICC1	Protein bicaudal C homolog 1 OS=Homo sapiens OX=9606 GN=BICC1 PE=1 SV=2			4	334.194	301.915	309.467	267.345	818.959	916.486	556.131	500.758	906.195	840.398	614.48	718.72	901.713	719.997	715.886	672.67		0.451452	0.407847	0.418049	0.361148	1.1063	1.23805	0.751259	0.676458	1.22415	1.13527	0.830081	0.970895	1.21809	0.97262	0.967067	0.908688		0.903412	1.11909	0.927392	0.798477	0.863889	0.900432	1.16964	0.939633
663	Q96G01	BICD1	Protein bicaudal D homolog 1 OS=Homo sapiens OX=9606 GN=BICD1 PE=1 SV=3			6	441.168	467.419	562.291	617.136	1121.9	1487.02	1032.68	1056.08	2231.45	1582.4	1364.06	2512.15	1524.05	1411.7	1622.44	1522.9		0.331795	0.351537	0.422889	0.464137	0.843761	1.11836	0.77666	0.794259	1.67823	1.19009	1.02589	1.88934	1.14621	1.06171	1.22021	1.14535		1.0595	1.32545	0.709135	0.926282	1.09754	1.02266	1.84167	0.938648
664	Q8TD16	BICD2	Protein bicaudal D homolog 2 OS=Homo sapiens OX=9606 GN=BICD2 PE=1 SV=1			4	150.105	163.096	227.9	213.981	471.847	587.263	400.498	382.643	1081.94	652.721	629.872	983.464	635.217	528.696	729.851	560.747		0.256687	0.278903	0.389721	0.365919	0.806883	1.00425	0.684873	0.65434	1.85017	1.11619	1.07711	1.68178	1.08625	0.904098	1.24808	0.958907		1.08655	1.2446	0.603288	0.832308	0.938925	0.955418	1.56137	0.768303
665	Q9NZM4	BICRA	BRD4-interacting chromatin-remodeling complex-associated protein OS=Homo sapiens OX=9606 GN=BICRA PE=1 SV=2			5	1106.7	819.681	1375.45	1133.46	2366.86	2202.37	1756.31	1889.15	2194.52	1421.42	2018.09	2067.36	3107.27	2202.81	2654.68	2393.89		0.504459	0.373629	0.626961	0.516656	1.07887	1.00389	0.800565	0.861117	1.00031	0.647915	0.91989	0.942349	1.41636	1.00409	1.21006	1.09119		0.740653	0.930503	0.647713	0.708921	0.824065	1.07564	1.02441	0.901762
666	Q6AI39	BICRAL	BRD4-interacting chromatin-remodeling complex-associated protein-like OS=Homo sapiens OX=9606 GN=BICRAL PE=1 SV=2			2	211.409	180.973	318.953	233.177	415.82	406.833	367.481	334.149	414.759	262.084	380.941	379.01	627.653	379.55	561.123	432.515		0.506478	0.433561	0.764124	0.558628	0.99619	0.97466	0.880383	0.800529	0.993648	0.627881	0.91263	0.908004	1.50368	0.909297	1.3443	1.03619		0.856033	0.978387	0.631895	0.604713	0.73107	0.909296	0.994931	0.770802
667	Q9NQY0	BIN3	Bridging integrator 3 OS=Homo sapiens OX=9606 GN=BIN3 PE=1 SV=1			1	10.7254	7.38307	14.5095	13.8052	27.1808	35.2848	33.6355	26.3822	44.1365	36.0395	33.7143	54.2755	36.76	37.5531	57.296	44.7429		0.361116	0.248583	0.488524	0.464811	0.915158	1.18801	1.13248	0.888269	1.48604	1.21342	1.13514	1.82742	1.23768	1.26439	1.92911	1.50646		0.688372	1.29815	0.816546	1.02158	0.951459	0.784356	1.60987	0.780908
668	Q13490	BIRC2	Baculoviral IAP repeat-containing protein 2 OS=Homo sapiens OX=9606 GN=BIRC2 PE=1 SV=2			3	54.0461	56.5146	66.8914	63.694	223.188	250.234	158.232	166.988	237.548	211.353	208.517	224.593	257.479	214.644	232.686	210.853		0.279937	0.292723	0.34647	0.329909	1.15602	1.29611	0.819578	0.86493	1.2304	1.09472	1.08003	1.1633	1.33364	1.11177	1.20522	1.09213		1.04567	1.12118	0.889728	0.833637	0.9522	1.05534	1.0771	0.90617
669	O15392	BIRC5	Baculoviral IAP repeat-containing protein 5 OS=Homo sapiens OX=9606 GN=BIRC5 PE=1 SV=3			1	69.8403	78.2072	106.237	98.044	170.315	139.93	193.609	127.651	144.332	98.247	226.452	197.013	208.199	204.489	367.909	213.932		0.471347	0.527815	0.716986	0.661692	1.14944	0.944378	1.30665	0.861508	0.974087	0.663062	1.52831	1.32963	1.40512	1.38008	2.48299	1.44381		1.1198	0.821595	0.680701	0.982181	0.92288	0.659324	0.869999	0.581481
670	Q9NR09	BIRC6	Baculoviral IAP repeat-containing protein 6 OS=Homo sapiens OX=9606 GN=BIRC6 PE=1 SV=2			20	1278.66	1110.38	1509.32	1284.35	5028.68	4864.87	3465.99	3620.59	4904.78	4680.14	4318.89	4746.9	4653.32	3684.57	5191.99	4328.93		0.322376	0.279949	0.38053	0.323811	1.26783	1.22653	0.873847	0.912824	1.23659	1.17996	1.08888	1.19679	1.1732	0.928955	1.30901	1.09141		0.868393	0.967425	0.9542	0.791815	0.850946	1.0446	1.0991	0.833771
671	P54132	BLM	Bloom syndrome protein OS=Homo sapiens OX=9606 GN=BLM PE=1 SV=1			10	905.151	509.473	874.694	700.524	1615.2	1750.5	1361.08	1025.21	2206.37	1571.78	1365.49	1666.3	2962.86	1618	1658.16	1795.57		0.470845	0.26502	0.455002	0.364402	0.840202	0.910583	0.708013	0.533298	1.14772	0.817615	0.710307	0.866783	1.54123	0.841658	0.862549	0.934027		0.56286	1.08377	0.712383	0.546094	0.800879	0.753233	1.22029	1.08287
672	Q13867	BLMH	Bleomycin hydrolase OS=Homo sapiens OX=9606 GN=BLMH PE=1 SV=1			3	461.41	424.916	774.172	698.283	822.11	1173.89	1128.54	1021.53	1086.22	981.448	996.135	1647.08	817.502	764.294	944.853	1012.46		0.579071	0.533271	0.971589	0.876348	1.03175	1.47324	1.41632	1.28202	1.36321	1.23172	1.25015	2.06709	1.02597	0.959192	1.18579	1.27064		0.920908	1.4279	0.903544	0.934914	0.901974	0.905178	1.65347	1.07155
673	Q6QNY0	BLOC1S3	Biogenesis of lysosome-related organelles complex 1 subunit 3 OS=Homo sapiens OX=9606 GN=BLOC1S3 PE=1 SV=1			1	33.8941	24.9439	45.971	32.2087	60.5996	87.9845	67.4597	83.797	104.933	78.8662	127.132	149.3	73.8752	61.6631	99.9238	94.8538		0.496068	0.365075	0.672824	0.471401	0.886925	1.28773	0.987329	1.22644	1.53578	1.15427	1.86068	2.18513	1.08122	0.902491	1.46247	1.38826		0.735936	1.4519	0.751586	0.834693	0.700631	1.24218	1.17437	0.949261
674	P53004	BLVRA	Biliverdin reductase A OS=Homo sapiens OX=9606 GN=BLVRA PE=1 SV=2			3	147.15	145.128	301.595	207.054	437.488	423.77	455.12	405.905	540.262	403.351	523.291	776.251	453.817	358.444	579.206	554.785		0.372834	0.367711	0.764152	0.524613	1.10846	1.07371	1.15314	1.02844	1.36886	1.02197	1.32586	1.96679	1.14984	0.908191	1.46754	1.40566		0.986259	0.968644	0.746584	0.789843	0.68653	0.891864	1.4834	0.957837
675	Q9H2G9	BLZF1	Golgin-45 OS=Homo sapiens OX=9606 GN=BLZF1 PE=1 SV=2			1	29.6442	21.0351	33.081	39.2955	65.3658	75.1115	69.4609	63.4903	99.4763	69.1804	84.5578	98.7955	124.939	67.5723	110.608	76.1285		0.371219	0.263412	0.414256	0.492077	0.818543	0.940583	0.869823	0.795057	1.24569	0.866311	1.05887	1.23717	1.56455	0.846173	1.38509	0.953318		0.709586	1.14909	0.695446	0.540842	1.18786	0.914044	1.16838	0.688273
676	P35226	BMI1	Polycomb complex protein BMI-1 OS=Homo sapiens OX=9606 GN=BMI1 PE=1 SV=2			2	302.183	229.084	385.066	349.167	699.295	818.646	593.412	485.66	640.182	539.43	547.221	630.912	1001.56	755.161	777.534	770.96		0.457295	0.346674	0.582723	0.528396	1.05825	1.23886	0.898014	0.734952	0.968791	0.816323	0.828113	0.954763	1.51567	1.14279	1.17665	1.1667		0.758097	1.17067	0.84262	0.753985	0.906772	0.81842	1.15294	0.991545
677	Q9NSY1	BMP2K	BMP-2-inducible protein kinase OS=Homo sapiens OX=9606 GN=BMP2K PE=1 SV=2			6	242.608	268.498	391.403	425.696	509.169	781.654	625.36	624.233	784.736	651.332	591.721	887.58	988.754	674.526	713.42	760.581		0.384289	0.425298	0.619979	0.674299	0.806519	1.23813	0.990565	0.988779	1.24301	1.0317	0.937281	1.40592	1.56618	1.06844	1.13005	1.20475		1.10672	1.53516	0.830001	0.682198	1.08762	0.998198	1.5	1.06611
678	P18075	BMP7	Bone morphogenetic protein 7 OS=Homo sapiens OX=9606 GN=BMP7 PE=1 SV=1			1	84.7718	52.6952	80.8704	62.1914	209.125	199.785	182.096	119.059	204.214	145.686	184.627	201.144	263.858	171.911	219.813	180.169		0.445015	0.276627	0.424534	0.326477	1.09781	1.04878	0.955924	0.625007	1.07203	0.764787	0.96921	1.05592	1.38514	0.902457	1.15392	0.945808		0.621612	0.955338	0.713399	0.651528	0.769026	0.653825	1.08946	0.819647
679	P36894	BMPR1A	Bone morphogenetic protein receptor type-1A OS=Homo sapiens OX=9606 GN=BMPR1A PE=1 SV=2			2	133.615	125.613	836.29	718.458	242.085	413.128	466.746	420.145	432.122	377.718	380.143	656.873	603.034	473.269	594.813	750.355		0.37882	0.356133	2.37101	2.03694	0.686349	1.17128	1.3233	1.19118	1.22513	1.07089	1.07777	1.86234	1.7097	1.34179	1.68639	2.12738		0.940112	1.70654	0.8741	0.784813	0.859102	0.900158	1.72796	1.2615
680	O00238	BMPR1B	Bone morphogenetic protein receptor type-1B OS=Homo sapiens OX=9606 GN=BMPR1B PE=1 SV=1			1	30.5438	22.2539	166.049	145.766	79.1571	88.244	155.474	122.475	112.194	91.9733	150.879	264.159	141.221	135.036	196.432	226.729		0.336463	0.245144	1.82916	1.60572	0.871976	0.972075	1.71267	1.34916	1.2359	1.01316	1.66205	2.90991	1.55566	1.48753	2.16385	2.49759		0.72859	1.1148	0.81977	0.956203	0.877849	0.787752	1.7508	1.15424
681	Q13873	BMPR2	Bone morphogenetic protein receptor type-2 OS=Homo sapiens OX=9606 GN=BMPR2 PE=1 SV=2			2	19.5414	18.2213	165.299	120.341	34.1994	33.5653	66.5567	64.6589	42.3297	34.6131	51.6678	71.7418	66.5408	52.0632	106.14	97.5602		0.48069	0.448217	4.06611	2.96021	0.841255	0.825657	1.6372	1.59051	1.04125	0.851432	1.27095	1.76474	1.63681	1.28068	2.61089	2.39984		0.932446	0.981459	0.817702	0.782425	0.72802	0.971486	1.38852	0.919165
682	Q14692	BMS1	Ribosome biogenesis protein BMS1 homolog OS=Homo sapiens OX=9606 GN=BMS1 PE=1 SV=1			12	1115.62	536.792	779.338	563.709	2253.87	1992.52	1194.96	814.118	2311.32	1364.35	1112.63	1164.35	3055.38	1600.07	1348.09	1313.05		0.510804	0.245779	0.356832	0.258103	1.03197	0.912306	0.547131	0.372757	1.05827	0.624689	0.509435	0.533116	1.39895	0.732617	0.617244	0.6012		0.48116	0.884044	0.59029	0.523689	0.723318	0.681293	1.04648	0.974008
683	Q1RMZ1	BMT2	S-adenosylmethionine sensor upstream of mTORC1 OS=Homo sapiens OX=9606 GN=BMT2 PE=1 SV=1			2	85.3589	64.4664	151.352	119.115	252.563	244.416	288.272	253.641	255.52	238.71	315.213	393.814	274.889	218.332	366.181	369.435		0.393209	0.296967	0.697209	0.548708	1.16344	1.12591	1.32794	1.16841	1.17706	1.09963	1.45204	1.81412	1.26629	1.00575	1.68683	1.70182		0.755239	0.967743	0.934213	0.794255	0.787006	0.879867	1.24936	1.00889
684	P51813	BMX	Cytoplasmic tyrosine-protein kinase BMX OS=Homo sapiens OX=9606 GN=BMX PE=1 SV=1			1	7.50024	11.6427	16.2323	22.7739	72.5159	136.776	88.2977	70.8521	96.1589	71.4576	83.5041	129.685	105.01	101.462	53.4521	67.2991		0.106695	0.165623	0.230913	0.32397	1.03158	1.94571	1.25608	1.00791	1.36791	1.01652	1.18789	1.84483	1.49382	1.44335	0.760383	0.957364		1.55231	1.88615	0.74312	0.966213	1.403	0.802423	1.55304	1.25905
685	Q12981	BNIP1	Vesicle transport protein SEC20 OS=Homo sapiens OX=9606 GN=BNIP1 PE=1 SV=3			5	63.4635	88.8508	60.5365	63.7928	172.141	196.298	130.294	112.973	808.01	317.942	361.573	909.642	207.95	394.155	609.947	272.271		0.202829	0.283967	0.193475	0.203882	0.550163	0.627368	0.41642	0.361062	2.5824	1.01614	1.15559	2.90722	0.664608	1.25972	1.94939	0.870178		1.40003	1.14033	0.393488	1.89543	1.05379	0.867062	2.51579	0.446385
686	Q12982	BNIP2	BCL2/adenovirus E1B 19 kDa protein-interacting protein 2 OS=Homo sapiens OX=9606 GN=BNIP2 PE=1 SV=1			2	68.3233	77.0407	96.4002	96.3083	237.17	276.608	207.348	235.877	246.6	228.354	261.755	360.487	291.237	253.466	362.044	315.296		0.324064	0.365412	0.457236	0.4568	1.12492	1.31198	0.983472	1.11879	1.16965	1.08311	1.24153	1.70983	1.38137	1.20221	1.71721	1.49548		1.12759	1.16629	0.92601	0.870308	0.999047	1.13759	1.37719	0.870878
687	Q12983	BNIP3	BCL2/adenovirus E1B 19 kDa protein-interacting protein 3 OS=Homo sapiens OX=9606 GN=BNIP3 PE=1 SV=3			1	8.23913	6.45478	10.4861	11.6321	31.3185	28.6906	25.4264	18.4763	38.353	22.4235	23.0271	38.3799	50.8478	37.7994	23.8489	23.2784		0.255956	0.200524	0.32576	0.361362	0.972938	0.8913	0.789895	0.573983	1.19147	0.696607	0.715358	1.19231	1.57963	1.17427	0.740888	0.723165		0.78343	0.916091	0.584661	0.743383	1.10929	0.726658	1.66673	0.976079
688	Q8NFC6	BOD1L1	Biorientation of chromosomes in cell division protein 1-like 1 OS=Homo sapiens OX=9606 GN=BOD1L1 PE=1 SV=2			8	517.965	529.023	744.83	799.522	1216.82	1898.02	1403.37	1667.49	1878.65	1771.99	1877.25	2534.04	1808.38	1810.5	2122.15	2152.22		0.382134	0.390292	0.549506	0.589856	0.897722	1.40028	1.03535	1.23021	1.38599	1.3073	1.38496	1.86951	1.33415	1.33572	1.56564	1.58782		1.02135	1.55982	0.943225	1.00117	1.07343	1.1882	1.34987	1.01417
689	Q9H3K6	BOLA2	BolA-like protein 2 OS=Homo sapiens OX=9606 GN=BOLA2 PE=1 SV=1			1	10.7421	9.36506	16.1036	9.42728	26.9496	26.6925	23.1579	23.3246	48.3214	25.5974	30.4688	54.4085	32.1998	25.8386	33.2601	31.2821		0.363483	0.316888	0.544902	0.318993	0.9119	0.903201	0.7836	0.78924	1.63506	0.866146	1.03098	1.84103	1.08955	0.874307	1.12543	1.0585		0.871809	0.99046	0.529732	0.802446	0.585414	1.0072	1.78571	0.940529
690	Q14137	BOP1	Ribosome biogenesis protein BOP1 OS=Homo sapiens OX=9606 GN=BOP1 PE=1 SV=2			3	251.607	208.922	337.81	283.672	480.14	571.435	459.201	394.289	525.075	461.761	528.037	608.99	652.683	450.4	562.012	481.586		0.527062	0.437646	0.707639	0.594231	1.00579	1.19703	0.961927	0.82595	1.09992	0.967289	1.10612	1.2757	1.36723	0.943491	1.17729	1.00882		0.830351	1.19014	0.879419	0.690075	0.839738	0.858641	1.15331	0.856896
691	Q6PGQ7	BORA	Protein aurora borealis OS=Homo sapiens OX=9606 GN=BORA PE=1 SV=2			1	8.2035	8.69258	14.485	9.5033	27.7521	31.5875	35.941	32.9539	31.8765	21.6231	45.1699	40.0521	36.5262	25.7669	48.9613	40.6604		0.314436	0.333182	0.555203	0.364257	1.06372	1.21073	1.3776	1.26311	1.22181	0.828802	1.73134	1.53518	1.40003	0.987632	1.87666	1.55849		1.05962	1.1382	0.67834	0.705436	0.656079	0.916889	0.886699	0.83046
692	Q969J3	BORCS5	BLOC-1-related complex subunit 5 OS=Homo sapiens OX=9606 GN=BORCS5 PE=1 SV=1			1	8.60275	8.14869	7.67384	8.99881	14.1145	21.0781	23.6852	17.6017	31.6545	16.1626	30.7121	50.1711	25.7123	21.1165	27.5039	28.0918		0.429686	0.407007	0.383289	0.449468	0.704984	1.0528	1.18302	0.879161	1.58106	0.807282	1.53399	2.50592	1.28427	1.05472	1.37375	1.40312		0.947219	1.49336	0.510594	0.821261	1.17266	0.743152	1.63359	1.02138
693	Q86WA6	BPHL	Valacyclovir hydrolase OS=Homo sapiens OX=9606 GN=BPHL PE=1 SV=1			1	68.0791	51.544	113.456	89.8491	293.456	298.278	280.635	256.149	397.154	324.427	388.728	420.425	317.644	229.38	411.035	395.377		0.253004	0.191554	0.421639	0.333908	1.09058	1.1085	1.04293	0.951932	1.47595	1.20568	1.44464	1.56243	1.18047	0.85245	1.52754	1.46935		0.757119	1.01643	0.81688	0.722129	0.791929	0.912748	1.08154	0.961906
694	O95861	BPNT1	3'(2'),5'-bisphosphate nucleotidase 1 OS=Homo sapiens OX=9606 GN=BPNT1 PE=1 SV=1			2	81.3628	82.4053	137.816	110.924	142.077	175.326	220.024	138.878	274.742	167.542	226.893	438.603	179.558	156.777	159.501	204.665		0.480201	0.486354	0.813386	0.65467	0.838534	1.03477	1.29858	0.819654	1.62152	0.988828	1.33912	2.58862	1.05975	0.925293	0.94137	1.20793		1.01281	1.23402	0.609816	0.873127	0.80487	0.631195	1.93308	1.28316
695	Q12830	BPTF	Nucleosome-remodeling factor subunit BPTF OS=Homo sapiens OX=9606 GN=BPTF PE=1 SV=3			20	1663.08	1148.83	2313.92	1886.43	3723.48	3081.21	3764.37	2979.31	3416.26	1887.15	3623.4	3356.78	5665.39	3183.17	5160.33	4250.81		0.459789	0.317615	0.639725	0.521538	1.02942	0.851857	1.04073	0.823684	0.944487	0.521737	1.00175	0.928043	1.5663	0.880045	1.42667	1.17521		0.690785	0.827508	0.552402	0.561862	0.815253	0.79145	0.926417	0.823748
696	P15056	BRAF	Serine/threonine-protein kinase B-raf OS=Homo sapiens OX=9606 GN=BRAF PE=1 SV=4			4	369.815	271.755	397.763	308.088	1298.21	1291.73	895.727	865.783	1286.45	1089.57	948.851	1202.1	1442.17	1045.44	1154.84	1265.25		0.336452	0.247239	0.361879	0.280294	1.18109	1.1752	0.814919	0.787676	1.17039	0.991274	0.86325	1.09365	1.31206	0.951125	1.05066	1.1511		0.73484	0.995009	0.846959	0.724908	0.774552	0.96657	1.2669	1.09561
697	Q7Z569	BRAP	BRCA1-associated protein OS=Homo sapiens OX=9606 GN=BRAP PE=1 SV=2			2	205.848	159.202	275.53	245.002	499.869	546.313	546.533	438.624	834.605	515.902	664.156	748.134	659.396	499.643	771.89	610.015		0.374317	0.289495	0.501028	0.445515	0.908969	0.993424	0.993824	0.7976	1.51766	0.938124	1.20771	1.36042	1.19906	0.908558	1.40362	1.10926		0.773396	1.09291	0.618139	0.757728	0.889203	0.802557	1.12644	0.790287
698	Q6PJG6	BRAT1	BRCA1-associated ATM activator 1 OS=Homo sapiens OX=9606 GN=BRAT1 PE=1 SV=2			2	56.1959	51.7133	92.8115	70.24	317.135	306.795	250.062	252.34	388.578	306.658	346.909	394.343	298.318	273.188	431.527	274.934		0.212015	0.195103	0.350157	0.265	1.19648	1.15747	0.943428	0.952023	1.46602	1.15695	1.30881	1.48777	1.12549	1.03068	1.62806	1.03726		0.920233	0.967396	0.78918	0.915761	0.756803	1.00911	1.13673	0.637119
699	P38398	BRCA1	Breast cancer type 1 susceptibility protein OS=Homo sapiens OX=9606 GN=BRCA1 PE=1 SV=2			8	212.767	171.242	304.507	253.971	513.626	573.909	530.726	504.315	650.279	503.085	718.705	771.225	813.821	583.745	958.315	772.14		0.388528	0.3127	0.556052	0.46377	0.937919	1.048	0.969144	0.920916	1.18746	0.91867	1.31241	1.40831	1.4861	1.06596	1.74995	1.40998		0.804833	1.11737	0.773645	0.717289	0.83404	0.950236	1.07308	0.805727
700	P51587	BRCA2	Breast cancer type 2 susceptibility protein OS=Homo sapiens OX=9606 GN=BRCA2 PE=1 SV=3			14	554.784	431.639	675.123	571.232	1432.28	1567.58	1263.8	1139.83	1491.91	1325.71	1415.07	1641.9	1873.82	1354.15	1783.23	1657.82		0.414575	0.322552	0.504501	0.426866	1.0703	1.17141	0.944404	0.851765	1.11486	0.990668	1.05744	1.22695	1.40026	1.01192	1.33256	1.23884		0.778031	1.09446	0.888599	0.722668	0.846115	0.901907	1.1603	0.929673
701	P46736	BRCC3	Lys-63-specific deubiquitinase BRCC36 OS=Homo sapiens OX=9606 GN=BRCC3 PE=1 SV=2			1	16.3481	18.08	24.1647	18.105	59.6814	77.6853	61.3613	58.7945	97.1902	68.5808	89.4767	109.104	66.8828	74.405	148.202	93.8904		0.272352	0.301205	0.402573	0.301621	0.994265	1.2942	1.02225	0.97949	1.61915	1.14253	1.49064	1.81762	1.11424	1.23955	2.46898	1.56417		1.10594	1.30167	0.705635	1.11247	0.749233	0.958169	1.21936	0.63353
702	O95696	BRD1	Bromodomain-containing protein 1 OS=Homo sapiens OX=9606 GN=BRD1 PE=1 SV=1			3	282.022	167.765	476.503	395.29	526.504	520.442	669.6	432.734	562.496	350.019	619.006	684.373	1228.92	620.757	980.693	813.782		0.43389	0.258106	0.733098	0.608152	0.810024	0.800698	1.03018	0.665759	0.865398	0.538503	0.952338	1.05291	1.89069	0.955032	1.50879	1.252		0.594865	0.988486	0.62226	0.505124	0.829565	0.646257	1.1056	0.829803
703	P25440	BRD2	Bromodomain-containing protein 2 OS=Homo sapiens OX=9606 GN=BRD2 PE=1 SV=2			7	814.674	971.685	1142.67	933.596	2469.8	3488.98	1509.7	2003.58	3387.07	4254.49	2180.74	2411.04	2441.77	2808.28	3012.74	2528.78		0.357575	0.42649	0.501539	0.409772	1.08404	1.53138	0.662635	0.879408	1.48665	1.86737	0.957167	1.05825	1.07174	1.23261	1.32235	1.10993		1.19273	1.41266	1.2561	1.1501	0.81703	1.32714	1.10561	0.839362
704	Q15059	BRD3	Bromodomain-containing protein 3 OS=Homo sapiens OX=9606 GN=BRD3 PE=1 SV=1			4	275.355	331.5	457.437	377.531	868.823	1052.2	602.027	765.947	936.773	1199.51	895.421	1082.46	915.298	1092.28	1156.45	1043.86		0.3676	0.442553	0.61068	0.504005	1.15988	1.40469	0.803708	1.02254	1.25059	1.60135	1.19539	1.44509	1.22193	1.4582	1.54386	1.39356		1.2039	1.21106	1.28047	1.19336	0.825318	1.27228	1.20888	0.902642
705	O60885	BRD4	Bromodomain-containing protein 4 OS=Homo sapiens OX=9606 GN=BRD4 PE=1 SV=2			3	66.8356	65.4405	94.9239	85.4531	213.312	267.02	175.623	166.048	381.711	324.569	272.569	341.799	292.879	257.003	335.341	256.484		0.280017	0.274172	0.397696	0.358017	0.893699	1.11872	0.735796	0.69568	1.59923	1.35982	1.14196	1.43201	1.22706	1.07675	1.40496	1.07457		0.979126	1.25178	0.8503	0.877506	0.900227	0.94548	1.25399	0.764845
706	Q9NPI1	BRD7	Bromodomain-containing protein 7 OS=Homo sapiens OX=9606 GN=BRD7 PE=1 SV=1			7	360.229	253.905	605.652	415.959	805.526	692.511	856.771	624.708	778.957	426.357	851.99	745.265	1503.93	794.163	1377.61	968.442		0.417821	0.294499	0.702482	0.482461	0.934311	0.803227	0.993749	0.724584	0.903494	0.494522	0.988203	0.864416	1.74437	0.921131	1.59786	1.12327		0.704843	0.8597	0.547343	0.528058	0.686795	0.729142	0.874734	0.702987
707	Q9H0E9	BRD8	Bromodomain-containing protein 8 OS=Homo sapiens OX=9606 GN=BRD8 PE=1 SV=2			8	631.262	566.325	1124.68	838.561	1647.05	1572.35	1640.2	1465.8	1332.71	978.964	1793.46	1626.92	2286.58	1629.16	2522.79	1771		0.428148	0.384105	0.762805	0.568747	1.1171	1.06643	1.11245	0.994167	0.9039	0.663974	1.2164	1.10345	1.55085	1.10496	1.71106	1.20117		0.897131	0.954646	0.734566	0.712488	0.7456	0.893672	0.90714	0.702001
708	Q9H8M2	BRD9	Bromodomain-containing protein 9 OS=Homo sapiens OX=9606 GN=BRD9 PE=1 SV=2			5	186.632	151.177	262.362	205.875	370.13	377.42	335.741	315.399	374.204	270.931	380.725	391.59	526.349	372.231	495.062	424.234		0.512263	0.414947	0.720124	0.56508	1.01592	1.03593	0.921533	0.865699	1.02711	0.743644	1.045	1.07483	1.44471	1.02169	1.35883	1.16443		0.810027	1.0197	0.72402	0.707194	0.784698	0.939412	1.02854	0.856931
709	Q92994	BRF1	Transcription factor IIIB 90 kDa subunit OS=Homo sapiens OX=9606 GN=BRF1 PE=1 SV=1			3	103.095	115.83	162.505	120.024	423.167	444.718	382.695	413	480.641	425.995	620.175	638.323	473.108	367.916	678.402	516.88		0.278633	0.313052	0.439199	0.324387	1.14369	1.20193	1.0343	1.11621	1.29902	1.15133	1.67614	1.72518	1.27866	0.99436	1.83351	1.39696		1.12353	1.05093	0.886306	0.777658	0.738587	1.07919	1.02926	0.761908
710	Q9HAW0	BRF2	Transcription factor IIIB 50 kDa subunit OS=Homo sapiens OX=9606 GN=BRF2 PE=1 SV=1			2	89.0143	68.1519	143.02	117.786	261.555	223.626	276.833	236.287	231.089	183.396	290.252	309.183	302.298	194.114	372.697	311.898		0.4028	0.308395	0.647181	0.532995	1.18357	1.01193	1.2527	1.06922	1.0457	0.829887	1.31342	1.39909	1.36793	0.878387	1.6865	1.41137		0.765629	0.854987	0.793616	0.642128	0.823563	0.853536	1.06522	0.836867
711	Q8WY22	BRI3BP	BRI3-binding protein OS=Homo sapiens OX=9606 GN=BRI3BP PE=1 SV=1			1	10.3933	15.7296	25.7237	20.6747	41.9591	44.377	37.0217	35.3011	57.0399	43.5214	33.4816	51.481	39.3419	30.8667	58.1791	47.6281		0.279513	0.423026	0.691803	0.556017	1.12843	1.19346	0.995647	0.949374	1.53401	1.17045	0.900441	1.38451	1.05805	0.830117	1.56465	1.28089		1.51344	1.05763	0.762999	0.784576	0.803722	0.953525	1.53759	0.818646
712	Q9BX63	BRIP1	Fanconi anemia group J protein OS=Homo sapiens OX=9606 GN=BRIP1 PE=1 SV=2			9	303.334	218.909	349.672	286.727	940.567	1005.75	695.203	695.828	1091.8	919.754	981.084	1094.19	1128.62	860.499	1160.39	1021.78		0.350238	0.252758	0.403741	0.331063	1.086	1.16127	0.8027	0.803422	1.26062	1.06197	1.13279	1.26338	1.30314	0.993556	1.33982	1.17978		0.721676	1.0693	0.84242	0.762435	0.819988	1.0009	1.11529	0.880549
713	Q8TDN6	BRIX1	Ribosome biogenesis protein BRX1 homolog OS=Homo sapiens OX=9606 GN=BRIX1 PE=1 SV=2			2	124.495	66.0652	134.966	101.621	279.908	236.974	193.047	139.937	265.056	144.085	168.422	202.368	447.147	245.521	247.371	267.372		0.445976	0.236664	0.483487	0.364035	1.00271	0.848908	0.691549	0.501294	0.949506	0.516153	0.603335	0.72494	1.60181	0.879526	0.886153	0.957802		0.530665	0.846614	0.543602	0.549083	0.752938	0.724886	1.20155	1.08085
714	Q5VW32	BROX	BRO1 domain-containing protein BROX OS=Homo sapiens OX=9606 GN=BROX PE=1 SV=1			1	24.0878	23.7869	107.726	95.643	59.5548	70.567	89.3914	78.5295	99.0926	64.4526	89.2361	165.479	80.9007	85.7399	131.898	122.818		0.365471	0.360905	1.63447	1.45114	0.903592	1.07067	1.35629	1.19148	1.50348	0.977903	1.35393	2.51072	1.22746	1.30088	2.00121	1.86345		0.987508	1.18491	0.650428	1.05982	0.887836	0.878491	1.8544	0.931159
715	Q9ULD4	BRPF3	Bromodomain and PHD finger-containing protein 3 OS=Homo sapiens OX=9606 GN=BRPF3 PE=1 SV=2			3	315.65	212.545	599.782	505.452	702.204	717.665	896.353	694.606	692.701	436.862	825.993	947.576	1181.79	749.6	1090.65	1070.13		0.436532	0.293941	0.829475	0.69902	0.971121	0.992503	1.23962	0.960613	0.957978	0.604163	1.14232	1.31046	1.63437	1.03667	1.50833	1.47995		0.673357	1.02202	0.630665	0.634292	0.842726	0.774925	1.1472	0.981186
716	Q8TDC3	BRSK1	Serine/threonine-protein kinase BRSK1 OS=Homo sapiens OX=9606 GN=BRSK1 PE=1 SV=2			2	65.6485	62.9559	99.6839	80.7088	226.034	231.635	206.425	201.933	361.553	301.545	291.772	333.016	281.966	205.303	396.631	300.302		0.280789	0.269272	0.426363	0.345204	0.966782	0.990738	0.882911	0.863698	1.54642	1.28975	1.24795	1.42436	1.20601	0.878112	1.69645	1.28444		0.958985	1.02478	0.834027	0.728113	0.809647	0.978239	1.14136	0.757132
717	Q8IWQ3	BRSK2	Serine/threonine-protein kinase BRSK2 OS=Homo sapiens OX=9606 GN=BRSK2 PE=1 SV=3			2	103.615	79.817	212.175	189.063	390.581	411.674	471.544	355.588	660.751	592.163	622.055	752.018	484.744	322.339	637.265	578.047		0.252767	0.194712	0.517598	0.461216	0.952816	1.00427	1.15032	0.867451	1.61189	1.44457	1.51749	1.83454	1.18253	0.786341	1.5546	1.41014		0.770323	1.054	0.896197	0.664967	0.891071	0.754093	1.20893	0.907075
718	Q9NSI6	BRWD1	Bromodomain and WD repeat-containing protein 1 OS=Homo sapiens OX=9606 GN=BRWD1 PE=1 SV=4			3	56.7427	57.2069	87.9554	87.7233	152.673	270.899	181.944	172.303	151.27	189.125	168.267	267.127	206.299	209.621	194.726	265.884		0.400312	0.403587	0.620513	0.618876	1.07709	1.91116	1.28359	1.21557	1.06719	1.33425	1.1871	1.88454	1.45541	1.47885	1.37377	1.87578		1.00818	1.77437	1.25025	1.0161	0.997361	0.947011	1.58752	1.36543
719	Q6RI45	BRWD3	Bromodomain and WD repeat-containing protein 3 OS=Homo sapiens OX=9606 GN=BRWD3 PE=1 SV=2			3	35.5006	32.426	63.6486	59.3436	124.361	134.737	140.632	143.181	138.343	109.439	151.344	200.591	155.266	106.286	202.873	167.014		0.313146	0.286025	0.561435	0.523461	1.09697	1.1885	1.24049	1.26298	1.2203	0.965346	1.33498	1.76938	1.36958	0.937534	1.78951	1.47321		0.913393	1.08343	0.79107	0.684541	0.932363	1.01813	1.3254	0.823244
720	Q9NW68	BSDC1	BSD domain-containing protein 1 OS=Homo sapiens OX=9606 GN=BSDC1 PE=1 SV=1			2	145.923	143.993	266.109	201.545	345.915	468.383	441.517	357.997	832.285	540.383	562.358	751.567	589.412	540.324	617.412	568.16		0.305033	0.300999	0.556267	0.421304	0.723091	0.979095	0.922935	0.748347	1.73979	1.1296	1.17554	1.57105	1.23209	1.12948	1.29062	1.18767		0.986774	1.35404	0.649276	0.916717	0.757378	0.810834	1.33646	0.920228
721	P35613	BSG	Basigin OS=Homo sapiens OX=9606 GN=BSG PE=1 SV=2			4	57.0159	36.5839	104.925	253.487	146.23	268.972	379.069	208.013	776.611	441.338	574.582	967.482	829.464	645.784	582.392	709.298		0.126049	0.0808787	0.231965	0.560403	0.323282	0.594636	0.838036	0.45987	1.71691	0.975699	1.27027	2.13888	1.83376	1.42768	1.28754	1.5681		0.641644	1.83938	0.568287	0.778556	2.41589	0.548747	1.6838	1.2179
722	Q9UPA5	BSN	Protein bassoon OS=Homo sapiens OX=9606 GN=BSN PE=1 SV=4			1	15.641	9.64762	41.1682	35.4326	47.8347	53.2734	65.1505	94.623	57.3647	58.1448	122.598	127.847	42.4431	47.7596	143.595	113.72		0.383162	0.23634	1.00851	0.868002	1.17182	1.30505	1.59601	2.31801	1.40528	1.42439	3.00332	3.1319	1.03974	1.16998	3.51769	2.78583		0.616816	1.1137	1.0136	1.12526	0.860679	1.45238	1.04281	0.79195
723	Q10589	BST2	Bone marrow stromal antigen 2 OS=Homo sapiens OX=9606 GN=BST2 PE=1 SV=1			1	28.65	20.5511	21.7074	24.4154	108.792	188.501	85.6178	88.1486	505.741	442.058	107.56	144.762	125.12	149.526	100.373	126.101		0.14916	0.106995	0.113015	0.127113	0.566402	0.981389	0.44575	0.458926	2.63303	2.30148	0.559987	0.753671	0.65141	0.778474	0.52257	0.656517		0.717316	1.73267	0.87408	1.19506	1.12475	1.02956	1.34587	1.25632
724	O14981	BTAF1	TATA-binding protein-associated factor 172 OS=Homo sapiens OX=9606 GN=BTAF1 PE=1 SV=2			9	318.243	291.539	308.446	242.242	1123.01	1157.47	638.476	631.145	1056.97	1029.12	681.863	828.886	1140.37	956.952	910.917	826.716		0.349853	0.320496	0.339083	0.266303	1.23455	1.27244	0.701893	0.693834	1.16195	1.13134	0.74959	0.911216	1.25364	1.052	1.00139	0.90883		0.916089	1.03069	0.973651	0.839159	0.785363	0.988518	1.21562	0.907565
725	Q9H0C5	BTBD1	BTB/POZ domain-containing protein 1 OS=Homo sapiens OX=9606 GN=BTBD1 PE=1 SV=1			1	57.5689	45.0786	60.7124	47.6612	115.971	123.988	94.6742	81.8391	84.3797	71.0409	90.466	116.848	145.957	106.725	109.669	116.268		0.570163	0.446459	0.601297	0.472037	1.14858	1.22798	0.937655	0.810536	0.835698	0.70359	0.895977	1.15726	1.44556	1.05701	1.08616	1.15152		0.783037	1.06913	0.841919	0.731209	0.785032	0.864429	1.29162	1.06017
726	Q9BSF8	BTBD10	BTB/POZ domain-containing protein 10 OS=Homo sapiens OX=9606 GN=BTBD10 PE=1 SV=2			2	32.2685	18.3123	41.6226	28.5459	48.0431	64.3489	63.8291	51.3137	55.1329	56.8912	73.578	85.6573	88.2769	48.1265	81.8257	78.2729		0.576941	0.327413	0.744186	0.510383	0.858981	1.15052	1.14122	0.917457	0.985742	1.01718	1.31553	1.5315	1.57834	0.860472	1.46299	1.39947		0.567498	1.3394	1.03189	0.545177	0.685827	0.803923	1.16417	0.956581
727	A6QL63	BTBD11	Ankyrin repeat and BTB/POZ domain-containing protein BTBD11 OS=Homo sapiens OX=9606 GN=BTBD11 PE=2 SV=3			2	10.9434	13.6736	15.0069	14.991	36.9798	56.7971	34.8134	32.5629	48.7292	56.1708	45.8726	57.834	50.4919	45.547	45.8202	48.1488		0.297488	0.371706	0.407951	0.407518	1.00527	1.54398	0.946374	0.885196	1.32466	1.52696	1.24701	1.57217	1.37258	1.23816	1.24559	1.30889		1.24948	1.5359	1.15271	0.902065	0.99894	0.935355	1.26075	1.05082
728	Q9BX70	BTBD2	BTB/POZ domain-containing protein 2 OS=Homo sapiens OX=9606 GN=BTBD2 PE=1 SV=1			3	31.8362	26.8243	48.2499	41.639	65.0973	62.5129	77.1991	66.3684	36.4178	34.7228	56.842	81.4946	68.331	54.3403	89.2458	84.9078		0.631413	0.532011	0.956949	0.825834	1.29109	1.23983	1.5311	1.3163	0.722281	0.688663	1.12736	1.6163	1.35522	1.07774	1.77003	1.68399		0.842572	0.960299	0.953457	0.795251	0.862986	0.859704	1.4337	0.951393
729	Q9Y2F9	BTBD3	BTB/POZ domain-containing protein 3 OS=Homo sapiens OX=9606 GN=BTBD3 PE=2 SV=1			2	54.27	33.2416	70.2255	53.7304	80.7888	92.3737	101.29	95.0664	72.4947	75.811	82.8841	116.779	113.542	77.6997	114.058	149.236		0.676061	0.414102	0.874824	0.669339	1.00641	1.15073	1.26181	1.18428	0.903092	0.944404	1.03252	1.45476	1.41443	0.967933	1.42086	1.85909		0.612523	1.1434	1.04575	0.684326	0.765112	0.938557	1.40894	1.30842
730	Q9P203	BTBD7	BTB/POZ domain-containing protein 7 OS=Homo sapiens OX=9606 GN=BTBD7 PE=1 SV=3			5	137.147	121.12	216.415	170.763	394.292	450.385	399.856	379.182	460.912	394.358	550.881	550.811	506.894	369.001	610.78	532.536		0.36591	0.323149	0.577397	0.455597	1.05197	1.20163	1.06682	1.01166	1.22972	1.05215	1.46976	1.46957	1.3524	0.984498	1.62957	1.42081		0.88314	1.14226	0.855604	0.727965	0.789053	0.948296	0.999873	0.871895
731	Q5XKL5	BTBD8	BTB/POZ domain-containing protein 8 OS=Homo sapiens OX=9606 GN=BTBD8 PE=2 SV=2			1	313.992	281.257	369.378	292.193	961.433	1031.44	756.375	659.788	1524.26	1025.45	847.435	911.343	1380.94	901.711	1009.52	880.255		0.300426	0.269105	0.353419	0.279569	0.919894	0.986876	0.723696	0.631282	1.4584	0.981145	0.810821	0.871968	1.32128	0.862752	0.965903	0.842223		0.895746	1.07282	0.672753	0.652969	0.791041	0.872303	1.07541	0.871954
732	Q96Q07	BTBD9	BTB/POZ domain-containing protein 9 OS=Homo sapiens OX=9606 GN=BTBD9 PE=1 SV=2			1	58.2651	53.3122	57.2435	49.8717	111.338	138.724	107.845	105.177	103.693	100.775	118.105	147.479	134.126	99.5214	172.203	133.355		0.572037	0.52341	0.562007	0.489632	1.0931	1.36197	1.0588	1.03261	1.01804	0.989392	1.15953	1.44792	1.31683	0.977084	1.69066	1.30926		0.914994	1.24597	0.971859	0.741999	0.87122	0.975261	1.24871	0.774406
733	P35070	BTC	Probetacellulin OS=Homo sapiens OX=9606 GN=BTC PE=1 SV=1			1	0	2.24387	5.77122	12.5371	3.43016	6.19681	13.0398	7.35862	14.5212	5.20862	27.1443	39.0447	20.7517	17.2388	21.7279	28.6815		0	0.231906	0.596461	1.29572	0.35451	0.640447	1.34768	0.760521	1.50078	0.538316	2.80539	4.03531	2.14471	1.78165	2.2456	2.96426		NaN	1.80657	0.358691	0.830717	2.17235	0.56432	1.43841	1.32003
734	P43251	BTD	Biotinidase OS=Homo sapiens OX=9606 GN=BTD PE=1 SV=2			1	11.4368	10.4241	18.881	8.66996	27.854	24.0001	19.9849	20.6007	35.7299	23.9356	29.5619	38.9397	35.5317	27.2939	36.7296	32.4839		0.413806	0.377164	0.683151	0.313696	1.00781	0.86837	0.723092	0.745373	1.29278	0.866036	1.06961	1.40891	1.28561	0.987546	1.32895	1.17533		0.911453	0.861639	0.669904	0.768156	0.45919	1.03081	1.31723	0.884407
735	P20290	BTF3	Transcription factor BTF3 OS=Homo sapiens OX=9606 GN=BTF3 PE=1 SV=1			23	700.001	1118.01	719.915	1003.41	1496.04	4529.61	1256.17	2583.74	2804.53	4574.08	1776.36	4245.53	2185.74	3447.32	1925.98	3536.29		0.38963	0.6223	0.400715	0.558512	0.832717	2.52124	0.699202	1.43815	1.56104	2.546	0.988747	2.36312	1.21661	1.91883	1.07203	1.96835		1.59715	3.02773	1.63096	1.57719	1.39379	2.05684	2.39002	1.8361
736	Q96K17	BTF3L4	Transcription factor BTF3 homolog 4 OS=Homo sapiens OX=9606 GN=BTF3L4 PE=1 SV=1			9	647.257	853.256	705.358	787.863	1522.03	3712.85	1189.39	1934.7	2539.4	4555.03	1536.06	3432.07	1750.85	2491.13	1591.47	2572.31		0.400807	0.52837	0.436785	0.487876	0.942501	2.29914	0.736517	1.19804	1.5725	2.82065	0.951189	2.12527	1.0842	1.54261	0.985501	1.59288		1.31826	2.43941	1.79374	1.42281	1.11697	1.62663	2.23433	1.61631
737	Q14201	BTG3	Protein BTG3 OS=Homo sapiens OX=9606 GN=BTG3 PE=1 SV=3			1	151.39	97.2506	241.515	150.067	392.152	351.856	450.064	304.564	453.424	324.257	461.17	405.111	461.716	265.005	566.26	374.944		0.415142	0.266681	0.662283	0.411514	1.07536	0.96486	1.23417	0.835176	1.24338	0.889178	1.26462	1.1109	1.26612	0.726697	1.5528	1.02817		0.642385	0.897244	0.71513	0.573957	0.621357	0.676713	0.878442	0.662141
738	Q7KYR7	BTN2A1	Butyrophilin subfamily 2 member A1 OS=Homo sapiens OX=9606 GN=BTN2A1 PE=1 SV=3			1	92.909	72.4499	205.971	360.093	205.093	329.953	473.862	277.458	824.427	488.667	704.008	1261.92	1013.67	708.204	734.552	804.452		0.173979	0.135668	0.385696	0.6743	0.384051	0.617861	0.887341	0.51956	1.5438	0.915064	1.31831	2.36304	1.89817	1.32616	1.3755	1.50639		0.779794	1.6088	0.592735	0.698653	1.74827	0.585525	1.79248	1.09516
739	O00478	BTN3A3	Butyrophilin subfamily 3 member A3 OS=Homo sapiens OX=9606 GN=BTN3A3 PE=1 SV=1			1	8.89067	9.22107	15.9614	19.7022	25.4109	43.886	42.6069	21.3093	114.457	63.8547	61.8792	114.269	85.4265	54.1583	60.9436	70.8654		0.151857	0.157501	0.272629	0.336524	0.434031	0.749595	0.727748	0.363974	1.95498	1.09067	1.05693	1.95177	1.45913	0.925051	1.04095	1.21042		1.03716	1.72705	0.557892	0.633975	1.23437	0.500137	1.84665	1.1628
740	Q9Y297	BTRC	F-box/WD repeat-containing protein 1A OS=Homo sapiens OX=9606 GN=BTRC PE=1 SV=1			2	54.6546	42.9685	81.6258	63.1669	113.269	143.993	112.238	94.2925	102.554	111.307	116.548	150.896	148.947	105.957	144.444	146		0.521234	0.409785	0.778455	0.602415	1.08023	1.37324	1.0704	0.899256	0.978045	1.06152	1.1115	1.43908	1.42049	1.0105	1.37754	1.39238		0.786183	1.27125	1.08535	0.711374	0.773859	0.840112	1.29471	1.01077
741	O43683	BUB1	Mitotic checkpoint serine/threonine-protein kinase BUB1 OS=Homo sapiens OX=9606 GN=BUB1 PE=1 SV=1			2	63.9456	62.11	101.727	79.0592	235.724	251.246	231.565	210.517	251.114	193.261	260.419	265.544	318.567	241.322	318.754	259.829		0.294222	0.285777	0.46806	0.363762	1.0846	1.15602	1.06546	0.968617	1.15541	0.88922	1.19822	1.2218	1.46577	1.11036	1.46663	1.19551		0.971294	1.06585	0.769615	0.757524	0.77717	0.909105	1.01968	0.81514
742	O60566	BUB1B	Mitotic checkpoint serine/threonine-protein kinase BUB1 beta OS=Homo sapiens OX=9606 GN=BUB1B PE=1 SV=3			17	422.772	373.391	535.769	461.472	1472.84	1523.94	1083.62	1201.88	1651.4	1551.89	1425.43	1544.56	1761.97	1369.2	1913.1	1510.84		0.318533	0.281328	0.40367	0.347692	1.1097	1.1482	0.816443	0.905545	1.24423	1.16926	1.07398	1.16373	1.32754	1.03161	1.44141	1.13833		0.883197	1.03469	0.939742	0.777085	0.861326	1.10913	1.08357	0.789734
743	O43684	BUB3	Mitotic checkpoint protein BUB3 OS=Homo sapiens OX=9606 GN=BUB3 PE=1 SV=1			3	44.8871	23.0466	46.1259	32.1812	140.223	134.662	81.3452	85.2204	147.523	121.896	109.57	123.648	156.119	103.396	122.127	116.361		0.367361	0.188616	0.377499	0.263374	1.1476	1.10209	0.665738	0.697453	1.20734	0.99761	0.896733	1.01195	1.27769	0.846204	0.999501	0.952311		0.513435	0.960342	0.826285	0.66229	0.697682	1.04764	1.12848	0.952787
744	Q9BRD0	BUD13	BUD13 homolog OS=Homo sapiens OX=9606 GN=BUD13 PE=1 SV=1			3	37.1487	36.2535	54.4831	43.1126	62.35	86.9617	65.1481	68.6144	66.5522	73.7799	68.3785	77.1553	88.7188	65.9574	82.02	85.1189		0.583251	0.569196	0.855409	0.676887	0.978923	1.36534	1.02285	1.07728	1.0449	1.15838	1.07357	1.21137	1.39293	1.03556	1.28775	1.33641		0.975902	1.39473	1.1086	0.743443	0.791302	1.05321	1.12836	1.03778
745	O43709	BUD23	Probable 18S rRNA (guanine-N(7))-methyltransferase OS=Homo sapiens OX=9606 GN=BUD23 PE=1 SV=2			1	23.2694	22.2172	44.1352	30.2505	64.1145	70.4678	59.5871	71.4313	61.5024	61.2591	60.7371	83.4191	85.798	72.0165	85.6259	82.5414		0.396608	0.378674	0.752248	0.515595	1.09278	1.20107	1.01561	1.21749	1.04826	1.04411	1.03521	1.42181	1.46236	1.22746	1.45942	1.40685		0.954782	1.09909	0.996044	0.839373	0.685405	1.19877	1.37345	0.963977
746	Q13895	BYSL	Bystin OS=Homo sapiens OX=9606 GN=BYSL PE=1 SV=3			11	458.415	384.42	487.634	519.196	1279.64	1659.57	1074.83	1182.57	1766.75	1575.72	1225.14	1717.09	1500.41	1468.53	1632.09	1681.51		0.36635	0.307216	0.389701	0.414924	1.02265	1.32627	0.858968	0.94507	1.41193	1.25926	0.979091	1.37224	1.19908	1.1736	1.30431	1.34381		0.838585	1.2969	0.891875	0.978752	1.06472	1.10024	1.40155	1.03028
747	Q7L1Q6	BZW1	Basic leucine zipper and W2 domain-containing protein 1 OS=Homo sapiens OX=9606 GN=BZW1 PE=1 SV=1			8	529.033	535	973.895	888.923	1862.21	2299.88	2039.17	1761.46	3041.88	2245.52	2260.73	3493.85	2186.8	2217.74	2859.74	2248.91		0.27771	0.280843	0.511236	0.466631	0.977548	1.2073	1.07044	0.92466	1.5968	1.17876	1.18675	1.83406	1.14794	1.16418	1.50119	1.18054		1.01128	1.23503	0.738201	1.01415	0.91275	0.863812	1.54545	0.786404
748	Q9Y6E2	BZW2	Basic leucine zipper and W2 domain-containing protein 2 OS=Homo sapiens OX=9606 GN=BZW2 PE=1 SV=1			3	170.816	217.249	301.731	281.916	508.999	700.761	581.422	524.261	992.165	784.89	690.313	1071.56	767.57	751.7	808.654	678.348		0.280078	0.356212	0.494732	0.462243	0.834579	1.149	0.953327	0.859603	1.6268	1.28694	1.13187	1.75698	1.25854	1.23252	1.32591	1.11225		1.27183	1.37674	0.791088	0.979324	0.934329	0.901688	1.55228	0.838861
749	Q9H8K7	C10orf88	Uncharacterized protein C10orf88 OS=Homo sapiens OX=9606 GN=C10orf88 PE=1 SV=2			3	72.6245	65.035	62.8211	49.3557	185.658	213.011	127.146	116.211	227.37	210.177	127.939	168.095	236	185.896	162.249	154.048		0.402546	0.360478	0.348207	0.27357	1.02907	1.18068	0.704749	0.644138	1.26027	1.16498	0.709145	0.931723	1.30811	1.03039	0.899319	0.853862		0.895497	1.14733	0.924383	0.787695	0.785655	0.913997	1.31387	0.949454
750	C9JLR9	C11orf95	Uncharacterized protein C11orf95 OS=Homo sapiens OX=9606 GN=C11orf95 PE=1 SV=1			1	7.77295	9.24335	13.8458	11.4114	22.8164	34.6759	30.0492	16.0677	25.4637	21.3635	26.1438	30.0475	27.9674	26.5064	22.939	27.2886		0.37005	0.440052	0.659163	0.543268	1.08623	1.65083	1.43057	0.764942	1.21226	1.01706	1.24464	1.43049	1.33146	1.2619	1.09207	1.29914		1.18917	1.51978	0.838979	0.947761	0.824178	0.534713	1.14932	1.18962
751	E9PRG8	C11orf98	Uncharacterized protein C11orf98 OS=Homo sapiens OX=9606 GN=C11orf98 PE=4 SV=1			1	25.628	23.3756	33.6645	32.1494	60.4146	69.9123	62.8038	46.373	96.697	54.5667	56.4146	72.8966	69.7332	76.4572	93.7439	72.903		0.406032	0.370346	0.533356	0.509352	0.957166	1.10764	0.995019	0.734701	1.532	0.864516	0.893793	1.15492	1.1048	1.21133	1.48521	1.15502		0.912112	1.15721	0.564306	1.09642	0.954994	0.738379	1.29216	0.777683
752	Q9HB07	C12orf10	UPF0160 protein MYG1, mitochondrial OS=Homo sapiens OX=9606 GN=C12orf10 PE=1 SV=2			3	136.677	134.867	201.163	190.264	228.47	300.794	344.699	273.315	396.959	289.487	393.318	584.126	305.299	264.714	282.33	278.152		0.512184	0.505401	0.753839	0.712996	0.85617	1.1272	1.29173	1.02422	1.48757	1.08483	1.47392	2.18896	1.14408	0.991991	1.05801	1.04235		0.986757	1.31656	0.729262	0.867065	0.94582	0.792909	1.48512	0.985202
753	Q8N999	C12orf29	Uncharacterized protein C12orf29 OS=Homo sapiens OX=9606 GN=C12orf29 PE=1 SV=2			1	39.0037	43.2501	58.4639	44.3455	82.3539	158.329	90.9709	83.1669	84.9747	87.6091	74.8624	107.539	117.202	106.628	84.2163	112.536		0.48222	0.53472	0.722815	0.548263	1.01818	1.95749	1.12471	1.02823	1.05058	1.08315	0.925558	1.32955	1.44902	1.31829	1.0412	1.39133		1.10887	1.92254	1.031	0.90978	0.758511	0.914214	1.43649	1.33627
754	Q8N5I9	C12orf45	Uncharacterized protein C12orf45 OS=Homo sapiens OX=9606 GN=C12orf45 PE=1 SV=2			3	94.7409	71.6875	126.692	87.654	201.69	201.356	220.381	197.349	230.367	162.744	287.881	310.416	265.71	201.253	356.012	242.039		0.478183	0.361826	0.639449	0.442413	1.01798	1.0163	1.11232	0.996073	1.16272	0.821413	1.45301	1.56675	1.34111	1.01578	1.79689	1.22164		0.756669	0.998344	0.706455	0.757416	0.691867	0.89549	1.07828	0.679862
755	Q9H3J6	C12orf65	Probable peptide chain release factor C12orf65, mitochondrial OS=Homo sapiens OX=9606 GN=C12orf65 PE=2 SV=1			1	32.9882	36.2528	28.0635	45.0581	85.504	109.008	78.8762	89.1332	103.029	88.5598	95.3849	123.498	104.326	95.0968	121.698	116.433		0.404953	0.445028	0.344499	0.553119	1.04962	1.33815	0.96826	1.09417	1.26475	1.08713	1.17092	1.51602	1.28067	1.16738	1.49393	1.4293		1.09896	1.27489	0.859562	0.911535	1.60558	1.13004	1.29473	0.956737
756	Q96MD2	C12orf66	KICSTOR complex protein C12orf66 OS=Homo sapiens OX=9606 GN=C12orf66 PE=1 SV=4			1	49.1479	38.0385	92.9259	85.1549	186.807	194.872	210.031	208.899	204.236	198.86	227.72	353.273	177.457	159.663	355.651	296.27		0.318291	0.246344	0.601805	0.551479	1.2098	1.26203	1.3602	1.35287	1.32267	1.28785	1.47476	2.28786	1.14924	1.03401	2.30326	1.9187		0.77396	1.04317	0.973678	0.899728	0.916374	0.99461	1.55135	0.833036
757	Q6ZRI6	C15orf39	Uncharacterized protein C15orf39 OS=Homo sapiens OX=9606 GN=C15orf39 PE=1 SV=3			3	74.3021	51.8515	77.3968	56.318	224.966	237.298	172.822	176.603	254.983	219.734	260.107	254.312	247.829	196.44	294.519	223.037		0.370547	0.258585	0.38598	0.28086	1.12191	1.18341	0.861869	0.880725	1.27161	1.09582	1.29716	1.26826	1.23593	0.979653	1.46878	1.11229		0.697847	1.05482	0.861759	0.792643	0.727653	1.02188	0.977721	0.757292
758	Q8WUR7	C15orf40	UPF0235 protein C15orf40 OS=Homo sapiens OX=9606 GN=C15orf40 PE=1 SV=2			1	108.856	123.909	232.765	183.166	160.48	282.284	295.585	223.079	373.786	250.327	341.87	728.215	266.496	255.047	216.947	291.599		0.478689	0.544884	1.02357	0.805463	0.705703	1.24133	1.29982	0.980979	1.64371	1.1008	1.50336	3.20229	1.1719	1.12156	0.954014	1.28229		1.13828	1.759	0.669707	0.957039	0.786914	0.754703	2.13009	1.3441
759	A6NNL5	C15orf61	Uncharacterized protein C15orf61 OS=Homo sapiens OX=9606 GN=C15orf61 PE=2 SV=2			1	10.3359	8.88225	17.4769	10.461	33.2012	42.1561	59.569	36.6822	61.765	36.3178	75.1224	143.237	60.376	61.1367	79.5008	67.9072		0.249542	0.214446	0.421948	0.252562	0.801583	1.01778	1.43819	0.885626	1.4912	0.876828	1.8137	3.4582	1.45767	1.47604	1.9194	1.6395		0.859359	1.26972	0.588	1.0126	0.598562	0.615793	1.90671	0.85417
760	Q96GQ5	C16orf58	RUS1 family protein C16orf58 OS=Homo sapiens OX=9606 GN=C16orf58 PE=1 SV=2			1	75.9122	66.2918	145.275	138.876	315.178	349.372	440.101	358.999	553.277	377.002	558.891	802.056	502.692	326.744	554.695	565.406		0.209839	0.183246	0.401573	0.383885	0.871224	0.965743	1.21654	0.992355	1.52938	1.04212	1.5449	2.21706	1.38955	0.903195	1.5333	1.56291		0.873269	1.10849	0.681398	0.649988	0.955953	0.81572	1.43508	1.01931
761	Q7Z3J2	C16orf62	UPF0505 protein C16orf62 OS=Homo sapiens OX=9606 GN=C16orf62 PE=1 SV=2			8	254.845	229.864	380.907	312.618	921.994	945.247	764.23	832.236	953.085	858.962	1010.47	1159.63	936.908	776.716	1256.43	1082.2		0.332389	0.299806	0.496808	0.407741	1.20254	1.23286	0.996768	1.08547	1.24309	1.12032	1.31793	1.51248	1.22199	1.01305	1.63873	1.41149		0.901976	1.02522	0.901244	0.829021	0.82072	1.08899	1.14761	0.861329
762	Q9BSU1	C16orf70	UPF0183 protein C16orf70 OS=Homo sapiens OX=9606 GN=C16orf70 PE=1 SV=1			2	64.6643	44.8364	87.068	78.3303	247.357	191.465	204.053	213.559	228.521	177.145	287.574	295.011	223.317	183.62	357.62	277.369		0.338619	0.234789	0.455937	0.410182	1.2953	1.00262	1.06854	1.11832	1.19667	0.927632	1.5059	1.54484	1.16941	0.961538	1.8727	1.45246		0.693372	0.774043	0.77518	0.822239	0.899645	1.04659	1.02586	0.775597
763	A8MU93	C17orf100	Uncharacterized protein C17orf100 OS=Homo sapiens OX=9606 GN=C17orf100 PE=4 SV=2			1	4.55595	7.2695	12.1728	3.23435	14.7349	16.6339	19.383	13.2428	24.3756	14.6547	21.1752	23.9754	26.9467	15.1433	28.1527	21.2054		0.258079	0.411793	0.689549	0.183215	0.834683	0.942255	1.09798	0.750161	1.3808	0.83014	1.1995	1.35813	1.52644	0.857818	1.59476	1.20122		1.59561	1.12888	0.601204	0.561972	0.265703	0.683217	1.13224	0.753228
764	Q8N3J3	C17orf53	Uncharacterized protein C17orf53 OS=Homo sapiens OX=9606 GN=C17orf53 PE=1 SV=1			2	21.0807	15.3227	27.3017	18.1759	62.8499	56.2408	60.8874	43.0766	66.4569	60.0102	70.6494	67.5461	65.5451	55.9723	74.3497	64.3438		0.390505	0.283842	0.505745	0.336696	1.16425	1.04182	1.1279	0.797964	1.23107	1.11165	1.30873	1.25124	1.21418	1.03685	1.37728	1.19192		0.726859	0.894843	0.902994	0.853951	0.665742	0.70748	0.956075	0.865421
765	Q9HAS0	C17orf75	Protein Njmu-R1 OS=Homo sapiens OX=9606 GN=C17orf75 PE=1 SV=2			3	123.043	109.02	158.462	155.199	422.212	419.707	380.888	381.539	320.22	365.884	350.884	377.457	405.622	330.278	459.946	466.209		0.387203	0.343074	0.498662	0.488394	1.32865	1.32077	1.19861	1.20066	1.0077	1.1514	1.10419	1.18781	1.27645	1.03935	1.4474	1.46711		0.886032	0.994067	1.1426	0.814251	0.979408	1.00171	1.07573	1.01362
766	Q9BSJ5	C17orf80	Uncharacterized protein C17orf80 OS=Homo sapiens OX=9606 GN=C17orf80 PE=2 SV=2			3	196.653	170.294	332.969	324.545	585.254	629.741	879.813	504.506	691.68	540.382	1062.9	1166.7	1094.87	816.758	1151.38	869.492		0.306259	0.265208	0.518551	0.505432	0.911448	0.98073	1.37018	0.785695	1.07719	0.841567	1.65531	1.81697	1.7051	1.27198	1.79311	1.35411		0.865962	1.07601	0.78126	0.745986	0.9747	0.573424	1.09766	0.755174
767	Q32NC0	C18orf21	UPF0711 protein C18orf21 OS=Homo sapiens OX=9606 GN=C18orf21 PE=1 SV=1			2	85.378	73.6874	97.838	70.513	180.511	212.321	138.79	123.842	204.031	157.872	125.08	167.588	224.247	147.016	198.645	175.498		0.491974	0.424609	0.563772	0.406317	1.04016	1.22346	0.79975	0.713615	1.17569	0.909706	0.720749	0.965693	1.29218	0.847151	1.14465	1.01127		0.863072	1.17622	0.773765	0.655599	0.720712	0.892298	1.33985	0.883476
768	Q96B23	C18orf25	Uncharacterized protein C18orf25 OS=Homo sapiens OX=9606 GN=C18orf25 PE=1 SV=3			2	32.9911	26.7279	60.1226	49.0535	97.077	95.4421	112.934	107.818	100.627	77.7712	157.824	160.918	112.133	86.7059	177.363	140.659		0.384929	0.311852	0.70149	0.572339	1.13266	1.11359	1.31767	1.25798	1.17408	0.907408	1.84144	1.87754	1.30833	1.01165	2.06941	1.64116		0.810155	0.983159	0.772866	0.773242	0.815891	0.954699	1.0196	0.793057
769	Q9UFG5	C19orf25	UPF0449 protein C19orf25 OS=Homo sapiens OX=9606 GN=C19orf25 PE=1 SV=2			1	18.1043	18.4935	21.3622	19.516	89.7354	92.1033	65.8723	62.5946	92.2348	85.6868	95.1851	100.673	81.0843	83.8362	118.091	71.014		0.257567	0.263104	0.303917	0.277651	1.27665	1.31034	0.937154	0.890523	1.31221	1.21905	1.35418	1.43226	1.15357	1.19272	1.68006	1.0103		1.0215	1.02639	0.929007	1.03394	0.913576	0.950242	1.05766	0.60135
770	Q9H6X5	C19orf44	Uncharacterized protein C19orf44 OS=Homo sapiens OX=9606 GN=C19orf44 PE=1 SV=1			2	54.5543	59.6739	96.7913	94.988	288.7	285.583	270.28	252.545	462.356	354.024	406.717	461.38	356.814	279.421	462.677	352.94		0.187726	0.205343	0.333067	0.326862	0.993441	0.982715	0.930056	0.869029	1.59101	1.21823	1.39955	1.58765	1.22783	0.961511	1.59211	1.2145		1.09384	0.989203	0.765696	0.7831	0.981369	0.934383	1.1344	0.762822
771	Q8N9M1	C19orf47	Uncharacterized protein C19orf47 OS=Homo sapiens OX=9606 GN=C19orf47 PE=1 SV=1			8	1106.17	901.847	1259.39	1241.13	1831.3	2952.03	1977.79	2121.48	2064.32	2584.18	2203.5	3267.79	2397.51	1982.62	2143.97	2989.03		0.597986	0.487531	0.680816	0.670945	0.989986	1.59584	1.06918	1.14685	1.11595	1.39699	1.19119	1.76654	1.29607	1.07179	1.15901	1.61584		0.815288	1.61199	1.25183	0.82695	0.985501	1.07265	1.483	1.39416
772	Q9UNZ5	C19orf53	Leydig cell tumor 10 kDa protein homolog OS=Homo sapiens OX=9606 GN=C19orf53 PE=1 SV=1			1	398.278	408.866	576.71	515.239	888.332	1023.29	799.263	695.515	1064.42	800.469	813.059	955.123	1534.08	1213.62	1167.78	1090.74		0.410056	0.420957	0.593764	0.530476	0.914602	1.05355	0.822899	0.716083	1.0959	0.82414	0.837103	0.983368	1.57945	1.24951	1.20231	1.123		1.02658	1.15192	0.752024	0.791106	0.893411	0.870195	1.17473	0.934029
773	Q5BKX5	C19orf54	UPF0692 protein C19orf54 OS=Homo sapiens OX=9606 GN=C19orf54 PE=1 SV=2			1	2.9401	6.06357	4.93637	4.00605	13.0995	11.2168	12.9401	9.79333	15.1582	11.4721	15.8497	27.6524	17.2903	11.4525	16.2993	14.8358		0.242542	0.500211	0.407223	0.330477	1.08064	0.925324	1.06749	0.807896	1.25047	0.946385	1.30751	2.28117	1.42635	0.944768	1.3446	1.22387		2.06237	0.856277	0.756825	0.662366	0.811538	0.75682	1.74466	0.910211
774	Q13901	C1D	Nuclear nucleic acid-binding protein C1D OS=Homo sapiens OX=9606 GN=C1D PE=1 SV=1			1	13.6744	10.5863	9.22584	11.3756	24.5671	22.1422	28.8168	15.7674	51.7889	33.2905	30.2946	45.1102	33.1029	31.1115	56.4452	36.6238		0.444215	0.343897	0.299703	0.369538	0.798065	0.719292	0.936117	0.512206	1.68237	1.08145	0.984124	1.46541	1.07535	1.01066	1.83363	1.18973		0.774169	0.901295	0.642811	0.939842	1.23302	0.54716	1.48905	0.648838
775	Q96EU7	C1GALT1C1	C1GALT1-specific chaperone 1 OS=Homo sapiens OX=9606 GN=C1GALT1C1 PE=1 SV=1			1	42.0244	37.5085	93.3841	115.813	127.397	107.856	223.83	112.389	89.0237	57.9877	136.483	206.856	315.412	189.819	200.687	203.23		0.292926	0.261448	0.650922	0.80726	0.888005	0.751797	1.56018	0.783394	0.620529	0.404196	0.951338	1.44186	2.19854	1.32311	1.39886	1.41659		0.892541	0.846613	0.651374	0.601813	1.24018	0.502118	1.51562	1.01267
776	Q9NSG2	C1orf112	Uncharacterized protein C1orf112 OS=Homo sapiens OX=9606 GN=C1orf112 PE=1 SV=1			3	46.5276	62.342	75.9133	60.7072	218.108	212.262	182.339	142.547	278.884	256.26	202.194	310.893	207.565	181.388	324.059	201.323		0.247789	0.332011	0.404286	0.323304	1.16156	1.13043	0.97107	0.759153	1.48523	1.36475	1.07681	1.6557	1.10541	0.966006	1.72582	1.07217		1.33989	0.973197	0.918877	0.873885	0.799691	0.781769	1.5376	0.621254
777	Q8NDD1	C1orf131	Uncharacterized protein C1orf131 OS=Homo sapiens OX=9606 GN=C1orf131 PE=1 SV=4			5	208.8	250.143	312.737	326.696	415.704	551.671	466.69	435.759	458.781	339.252	461.398	549.446	645.465	536.475	652.514	550.284		0.483124	0.578784	0.723614	0.755913	0.96186	1.27646	1.07983	1.00826	1.06153	0.784965	1.06759	1.27131	1.49348	1.2413	1.50979	1.27325		1.198	1.32708	0.739464	0.831145	1.04463	0.933723	1.19083	0.843329
778	Q5SNV9	C1orf167	Uncharacterized protein C1orf167 OS=Homo sapiens OX=9606 GN=C1orf167 PE=2 SV=2			1	317.437	321.553	429.243	395.599	578.349	720.589	556.228	515.445	302.623	343.276	371.078	517.741	677.955	498.593	545.093	695.642		0.676707	0.685481	0.915053	0.843331	1.23291	1.53614	1.18576	1.09882	0.645126	0.73179	0.791058	1.10371	1.44525	1.06289	1.16202	1.48296		1.01297	1.24594	1.13434	0.735437	0.92162	0.926679	1.39523	1.27619
779	Q8IYL3	C1orf174	UPF0688 protein C1orf174 OS=Homo sapiens OX=9606 GN=C1orf174 PE=1 SV=2			1	103.516	126.364	119.323	122.224	190.94	543.619	216.918	228.326	508.708	785.277	293.775	512.569	425.468	506.584	274.163	350.486		0.337012	0.411397	0.388474	0.397919	0.621634	1.76984	0.70621	0.74335	1.65618	2.55659	0.95643	1.66875	1.38518	1.64926	0.89258	1.14106		1.22072	2.84707	1.54367	1.19065	1.02431	1.05259	1.74477	1.27839
780	B1AJZ1	C1orf196	Putative uncharacterized protein C1orf196 OS=Homo sapiens OX=9606 GN=C1orf196 PE=5 SV=2			1	29.4667	23.7938	40.6265	40.3672	87.8258	81.2688	96.8586	95.5719	68.3668	65.6058	93.9756	112.834	81.9825	61.2601	104.385	116.127		0.44039	0.355607	0.607177	0.603302	1.31259	1.21459	1.44759	1.42836	1.02177	0.980502	1.4045	1.68634	1.22526	0.915554	1.56007	1.73556		0.807481	0.925341	0.959615	0.747234	0.993617	0.986716	1.20067	1.11249
781	Q9H425	C1orf198	Uncharacterized protein C1orf198 OS=Homo sapiens OX=9606 GN=C1orf198 PE=1 SV=1			2	79.8809	72.0087	180.557	162.896	357.024	343.512	369.78	373.538	449.247	360.416	486.367	582.78	428.883	337.951	597.616	493.526		0.242977	0.219032	0.549208	0.495488	1.08598	1.04488	1.12478	1.13621	1.36649	1.09629	1.4794	1.77267	1.30455	1.02796	1.8178	1.50118		0.901451	0.962154	0.802267	0.787979	0.902186	1.01016	1.19823	0.825825
782	Q9H246	C1orf21	Uncharacterized protein C1orf21 OS=Homo sapiens OX=9606 GN=C1orf21 PE=1 SV=1			1	0	2.68868	0	4.69128	7.65326	14.7581	12.1485	9.04114	19.9566	16.5829	16.121	30.0235	11.8248	17.3845	20.1903	14.4735		0	0.272723	0	0.475853	0.776298	1.49697	1.23227	0.917075	2.02427	1.68206	1.63521	3.04539	1.19943	1.76337	2.04798	1.4681		NaN	1.92834	0.830948	1.47017	NaN	0.744219	1.86238	0.716854
783	Q9BWL3	C1orf43	Uncharacterized protein C1orf43 OS=Homo sapiens OX=9606 GN=C1orf43 PE=2 SV=1			2	71.0133	67.2634	127.184	119.436	240.491	235.553	250.65	215.862	256.939	225.228	272.745	328.011	308.334	255.234	391.279	285.941		0.323974	0.306867	0.580234	0.544886	1.09716	1.07463	1.14351	0.984797	1.1722	1.02753	1.24431	1.49644	1.40667	1.16442	1.78508	1.30451		0.947194	0.979467	0.876582	0.827784	0.93908	0.861209	1.20263	0.730785
784	Q9BV19	C1orf50	Uncharacterized protein C1orf50 OS=Homo sapiens OX=9606 GN=C1orf50 PE=1 SV=2			1	5.87799	5.89637	9.67564	8.2421	17.8016	16.8638	13.7862	17.5881	18.987	15.0957	18.3827	31.6523	19.9227	19.8739	17.5989	20.3821		0.375655	0.376829	0.618358	0.526742	1.13768	1.07774	0.881058	1.12403	1.21343	0.964747	1.17481	2.02286	1.27323	1.27012	1.12472	1.30259		1.00313	0.947319	0.795055	0.997551	0.85184	1.27578	1.72185	1.15815
785	Q07021	C1QBP	Complement component 1 Q subcomponent-binding protein, mitochondrial OS=Homo sapiens OX=9606 GN=C1QBP PE=1 SV=1			9	209.881	196.737	262.99	292.703	369.745	578.298	463.349	404.07	488.658	475.137	495.382	658.665	582.673	542.972	556.945	601.467		0.508507	0.476662	0.637182	0.709172	0.895832	1.40112	1.12262	0.978996	1.18394	1.15118	1.20023	1.59584	1.41172	1.31553	1.34939	1.45726		0.937374	1.56405	0.97233	0.931864	1.11298	0.872064	1.32961	1.07994
786	P06681	C2	Complement C2 OS=Homo sapiens OX=9606 GN=C2 PE=1 SV=2			1	27.7635	31.2483	55.8909	31.5808	97.8257	103.717	62.6287	61.9738	131.226	113.674	66.81	85.2232	107.264	72.143	75.4037	103.388		0.305027	0.343313	0.614052	0.346966	1.07477	1.1395	0.688078	0.680883	1.44173	1.24889	0.734016	0.936315	1.17847	0.792608	0.828432	1.13588		1.12552	1.06022	0.866246	0.672574	0.565044	0.989543	1.27561	1.37113
787	Q6P5X5	C22orf39	UPF0545 protein C22orf39 OS=Homo sapiens OX=9606 GN=C22orf39 PE=1 SV=2			1	5.0332	4.20308	3.95992	6.71624	13.4573	13.2162	14.3672	10.6518	30.6632	14.5971	25.1245	37.9095	11.8384	12.4239	34.2008	22.7937		0.330089	0.275648	0.259701	0.440466	0.88256	0.866748	0.942234	0.698569	2.01096	0.957311	1.64772	2.48619	0.776389	0.814787	2.24297	1.49486		0.835071	0.982084	0.476046	1.04946	1.69605	0.741397	1.50887	0.666467
788	O14523	C2CD2L	Phospholipid transfer protein C2CD2L OS=Homo sapiens OX=9606 GN=C2CD2L PE=1 SV=3			1	51.1842	44.411	90.2619	82.4532	139.463	170.544	200.922	157.994	242.024	162.103	248.338	340.01	275.68	190.778	279.127	233.96		0.289033	0.250785	0.509701	0.465606	0.787536	0.963048	1.13459	0.892179	1.36669	0.915382	1.40234	1.92001	1.55674	1.07731	1.57621	1.32115		0.86767	1.22286	0.669781	0.692027	0.913488	0.786345	1.36914	0.838185
789	Q4AC94	C2CD3	C2 domain-containing protein 3 OS=Homo sapiens OX=9606 GN=C2CD3 PE=1 SV=4			6	553.024	473.988	687.862	639.289	860.179	1198.46	747.382	765.928	821.596	992.084	756.198	1085.41	1206.09	1002.73	941.115	1259.2		0.642885	0.551006	0.799633	0.743167	0.99995	1.3932	0.868824	0.890384	0.955097	1.15329	0.879073	1.26178	1.40207	1.16566	1.09404	1.46381		0.857084	1.39327	1.20751	0.831389	0.929386	1.02481	1.43535	1.33799
790	Q8TF44	C2CD4C	C2 calcium-dependent domain-containing protein 4C OS=Homo sapiens OX=9606 GN=C2CD4C PE=1 SV=2			1	7.59498	5.29941	8.81736	5.77658	30.8783	29.0114	20.4832	21.3462	40.5428	31.0034	33.0741	37.736	33.8002	34.427	35.4049	31.1178		0.269287	0.187895	0.312627	0.204814	1.09482	1.02862	0.72625	0.756848	1.43748	1.09925	1.17267	1.33796	1.19842	1.22064	1.25531	1.10331		0.697752	0.93954	0.764708	1.01854	0.655137	1.04213	1.14095	0.878912
791	Q86YS7	C2CD5	C2 domain-containing protein 5 OS=Homo sapiens OX=9606 GN=C2CD5 PE=1 SV=1			5	356.081	248.485	470.823	580.134	1159.28	1338.52	1224.75	1005.96	2117.84	1612.02	1664.55	2618.84	1686.44	1332.09	1589.7	1891.76		0.267748	0.186843	0.354026	0.43622	0.871698	1.00647	0.920927	0.756412	1.59247	1.21213	1.25163	1.96919	1.26809	1.00164	1.19534	1.42247		0.697833	1.15461	0.761162	0.789883	1.23217	0.821359	1.5733	1.19001
792	Q9NWW7	C2orf42	Uncharacterized protein C2orf42 OS=Homo sapiens OX=9606 GN=C2orf42 PE=1 SV=1			1	8.05548	5.28336	9.1209	6.65323	14.3188	17.5725	11.5224	10.8563	15.2336	15.3884	11.1582	18.3267	19.1605	14.8617	18.9349	15.3857		0.567603	0.372275	0.642675	0.468798	1.00893	1.23819	0.811889	0.764954	1.07339	1.08429	0.786226	1.29133	1.35008	1.04718	1.33419	1.0841		0.655872	1.22723	1.01016	0.775643	0.729449	0.942191	1.64244	0.812558
793	Q9BVC5	C2orf49	Ashwin OS=Homo sapiens OX=9606 GN=C2orf49 PE=1 SV=1			3	461.545	532.725	626.798	683.85	938.912	1342.8	1010.96	1124.44	944.12	1014.8	1055.99	1351.66	1280.03	1142.85	1381.82	1465.13		0.509346	0.587898	0.691714	0.754675	1.03615	1.48187	1.11566	1.2409	1.0419	1.1199	1.16536	1.49165	1.4126	1.26121	1.52493	1.61687		1.15422	1.43017	1.07486	0.892831	1.09102	1.11225	1.27999	1.06029
794	P01024	C3	Complement C3 OS=Homo sapiens OX=9606 GN=C3 PE=1 SV=2			3	339.08	273.525	408.872	321.799	694.093	751.67	669.458	519.571	556.975	448.678	585.441	773.434	924.745	582.919	696.778	768.223		0.539315	0.435048	0.650321	0.511829	1.10397	1.19555	1.06479	0.826391	0.885883	0.713634	0.931159	1.23017	1.47083	0.927147	1.10824	1.22188		0.806668	1.08295	0.805562	0.630356	0.787041	0.776107	1.32111	1.10254
795	Q9HBI5	C3orf14	Uncharacterized protein C3orf14 OS=Homo sapiens OX=9606 GN=C3orf14 PE=2 SV=1			1	34.2089	33.6034	51.4432	54.6456	81.0606	100.408	101.264	74.7209	107.49	84.8304	125.213	167.784	103.416	121.434	197.877	141.587		0.419515	0.41209	0.630865	0.670137	0.994073	1.23134	1.24183	0.916328	1.31819	1.0403	1.53553	2.05759	1.26823	1.48919	2.42663	1.73633		0.9823	1.23868	0.789193	1.17423	1.06225	0.737882	1.33999	0.71553
796	Q5JPI3	C3orf38	Uncharacterized protein C3orf38 OS=Homo sapiens OX=9606 GN=C3orf38 PE=1 SV=1			2	97.4587	73.9361	127.457	105.538	283.709	325.807	253.076	290.796	284.958	256.658	289.217	383.354	363.12	283.201	438.286	385.796		0.378758	0.287341	0.495341	0.410157	1.10259	1.2662	0.98354	1.13013	1.10744	0.997461	1.124	1.48984	1.41121	1.10062	1.70333	1.49933		0.75864	1.14838	0.900687	0.77991	0.828028	1.14905	1.32549	0.880238
797	F5H4A9	C3orf80	Uncharacterized membrane protein C3orf80 OS=Homo sapiens OX=9606 GN=C3orf80 PE=2 SV=1			2	18.8395	22.7747	140.048	130.172	45.7665	60.1437	100.012	77.6921	113.879	71.9297	128.446	183.285	148.747	108.066	158.379	142.141		0.230289	0.278392	1.71191	1.59119	0.559438	0.735181	1.22252	0.949688	1.39203	0.87925	1.57009	2.24043	1.81825	1.32097	1.93598	1.7375		1.20888	1.31414	0.631633	0.726509	0.929481	0.776828	1.42694	0.897474
798	P0C0L5	C4B	Complement C4-B OS=Homo sapiens OX=9606 GN=C4B PE=1 SV=2			1	25.614	21.6432	122.751	120.87	53.4098	64.9289	114.217	90.9175	50.5009	59.4767	88.804	125.433	74.7203	51.6205	92.8662	115.803		0.501633	0.423867	2.404	2.36716	1.04599	1.27159	2.23686	1.78056	0.989026	1.16481	1.73917	2.45652	1.46335	1.01095	1.81872	2.26792		0.844975	1.21567	1.17774	0.69085	0.984676	0.796007	1.41247	1.24699
799	Q96GV9	C5orf30	UNC119-binding protein C5orf30 OS=Homo sapiens OX=9606 GN=C5orf30 PE=1 SV=1			1	26.675	27.4938	44.1549	41.3239	67.7223	72.8159	63.4855	65.9829	73.2131	74.158	91.5474	98.4448	79.6824	65.9752	96.2249	86.6124		0.431472	0.444717	0.714212	0.668421	1.09542	1.17781	1.02689	1.06728	1.18423	1.19952	1.48079	1.59236	1.28888	1.06716	1.55645	1.40097		1.0307	1.07521	1.01291	0.827977	0.935885	1.03934	1.07534	0.900104
800	Q96MH7	C5orf34	Uncharacterized protein C5orf34 OS=Homo sapiens OX=9606 GN=C5orf34 PE=2 SV=2			2	80.4307	44.237	86.5421	66.6099	273.869	255.831	189.602	177.947	234.302	223.385	194.973	242.891	292.596	176.064	217.407	253.724		0.365097	0.200804	0.392839	0.302361	1.24317	1.16129	0.860656	0.807751	1.06356	1.01401	0.885036	1.10255	1.32817	0.799203	0.98687	1.15172		0.550001	0.934136	0.953406	0.601731	0.769682	0.938529	1.24577	1.16705
801	A6NDU8	C5orf51	UPF0600 protein C5orf51 OS=Homo sapiens OX=9606 GN=C5orf51 PE=1 SV=1			2	29.9764	36.0919	49.7374	49.8166	99.9476	129.337	103.34	105.402	164.274	121.217	136.377	193.915	127.679	125.484	154.463	126.608		0.284219	0.342203	0.471582	0.472333	0.947647	1.2263	0.979812	0.999362	1.55755	1.14931	1.29305	1.83859	1.21058	1.18977	1.46453	1.20043		1.20401	1.29405	0.737895	0.982808	1.00159	1.01995	1.4219	0.819666
802	Q9H6K1	C6orf106	Uncharacterized protein C6orf106 OS=Homo sapiens OX=9606 GN=C6orf106 PE=1 SV=2			1	15.9001	15.5195	30.5227	22.2759	60.9906	65.208	73.7903	64.5442	94.4334	67.0053	93.9266	108.389	76.1137	51.7681	106.712	71.5646		0.257036	0.250883	0.49342	0.360105	0.985954	1.05413	1.19287	1.0434	1.52658	1.08319	1.51839	1.75218	1.23043	0.836866	1.72507	1.15689		0.976063	1.06915	0.709551	0.680142	0.729814	0.874698	1.15398	0.670633
803	Q7Z4R8	C6orf120	UPF0669 protein C6orf120 OS=Homo sapiens OX=9606 GN=C6orf120 PE=1 SV=1			1	156.786	139.242	146.544	152.509	355.408	468.623	296.126	276.032	524.286	471.158	372.397	542.254	502.328	505.467	404.11	457.286		0.407552	0.361948	0.380929	0.396434	0.923853	1.21815	0.769754	0.717522	1.36284	1.22473	0.968014	1.40954	1.30576	1.31392	1.05045	1.18868		0.888102	1.31855	0.898666	1.00625	1.0407	0.932144	1.45612	1.13159
804	Q8WVR3	C7orf43	Uncharacterized protein C7orf43 OS=Homo sapiens OX=9606 GN=C7orf43 PE=1 SV=2			2	98.8405	66.1699	123.122	106.235	268.366	306.688	229.953	226.792	255.87	258.493	268.721	322.32	296.732	199.978	277.748	338.908		0.429831	0.287755	0.535424	0.461987	1.16705	1.3337	1	0.986257	1.11271	1.12412	1.1686	1.40168	1.29041	0.869651	1.20785	1.47382		0.669461	1.1428	1.01025	0.673935	0.862843	0.986254	1.19946	1.2202
805	Q9BRJ6	C7orf50	Uncharacterized protein C7orf50 OS=Homo sapiens OX=9606 GN=C7orf50 PE=1 SV=1			5	405.194	357.577	804.435	634.482	1076.93	978.486	1188.77	1007.54	1316.3	683.533	1296.76	1136.4	1734.64	1159.43	2043.3	1300.4		0.357545	0.315528	0.709838	0.55987	0.950289	0.863421	1.04898	0.889059	1.16151	0.603153	1.14427	1.00277	1.53066	1.02309	1.80302	1.14748		0.882483	0.908588	0.519284	0.668398	0.78873	0.847548	0.876338	0.636421
806	Q9H7E9	C8orf33	UPF0488 protein C8orf33 OS=Homo sapiens OX=9606 GN=C8orf33 PE=1 SV=1			4	185.365	170.57	306.785	244.755	576.244	609.449	557.368	512.685	761.013	537.39	575.728	608.408	790.095	599.626	905.518	637.016		0.320601	0.295012	0.530605	0.42332	0.996653	1.05408	0.964006	0.886723	1.31622	0.929452	0.99576	1.05228	1.36652	1.03709	1.56615	1.10176		0.920185	1.05762	0.706151	0.758929	0.797806	0.919832	1.05676	0.703482
807	Q8N0T1	C8orf59	Uncharacterized protein C8orf59 OS=Homo sapiens OX=9606 GN=C8orf59 PE=1 SV=4			3	341.588	339.321	378.771	422.455	708.696	848.6	709.407	611.442	663.338	536.883	652.889	815.126	986.23	827.104	1056.13	846.691		0.506084	0.502725	0.561173	0.625894	1.04998	1.25725	1.05103	0.90589	0.982777	0.795426	0.967296	1.20766	1.46116	1.22541	1.56472	1.25443		0.993363	1.19741	0.809366	0.838652	1.11533	0.861906	1.24849	0.801692
808	Q96K31	C8orf76	Uncharacterized protein C8orf76 OS=Homo sapiens OX=9606 GN=C8orf76 PE=2 SV=1			1	7.68339	6.07886	11.2459	7.12664	28.2478	21.3723	34.6103	29.8208	23.8835	18.0619	41.2528	38.1913	35.7128	24.7865	39.2559	32.4915		0.321725	0.254539	0.470897	0.298412	1.18281	0.894917	1.44923	1.24868	1.00007	0.756302	1.72737	1.59918	1.49539	1.03788	1.64375	1.36051		0.791169	0.756601	0.75625	0.694051	0.63371	0.861616	0.925787	0.827685
809	P02748	C9	Complement component C9 OS=Homo sapiens OX=9606 GN=C9 PE=1 SV=2			2	33.5694	38.5246	88.8656	85.4339	133.484	146.509	234.726	265.14	44.8303	39.4854	176.044	197.546	132.143	120.39	211.894	196.815		0.390312	0.447926	1.03324	0.99334	1.55202	1.70346	2.72916	3.08278	0.521242	0.459097	2.04686	2.29687	1.53643	1.39978	2.46369	2.28837		1.14761	1.09758	0.880775	0.911058	0.961383	1.12957	1.12214	0.928837
810	Q8IXQ3	C9orf40	Uncharacterized protein C9orf40 OS=Homo sapiens OX=9606 GN=C9orf40 PE=1 SV=1			1	2.59932	2.81536	4.68331	2.37119	10.6777	14.0724	10.2193	9.15847	13.5924	12.6913	15.1986	15.605	14.6528	11.7755	21.8305	15.9151		0.250403	0.271215	0.451162	0.228426	1.02863	1.35565	0.984466	0.882272	1.30941	1.2226	1.46414	1.50329	1.41156	1.13438	2.10302	1.53316		1.08311	1.31792	0.933706	0.803635	0.506306	0.896193	1.02674	0.72903
811	Q5T6V5	C9orf64	Queuosine salvage protein OS=Homo sapiens OX=9606 GN=C9orf64 PE=1 SV=1			2	111.787	108.357	132.833	114.09	502.723	510.543	482.714	457.994	681.816	528.053	542.237	790.724	494.699	413.205	909.599	649.011		0.24966	0.242	0.296664	0.254804	1.12276	1.14023	1.07807	1.02286	1.52274	1.17933	1.21101	1.76597	1.10484	0.922835	2.03146	1.44947		0.969317	1.01556	0.77448	0.835265	0.858898	0.94879	1.45826	0.713513
812	Q96LT7	C9orf72	Guanine nucleotide exchange C9orf72 OS=Homo sapiens OX=9606 GN=C9orf72 PE=1 SV=2			3	395.288	311.165	611.925	596.752	1389.38	1625.99	1612.39	1470.5	2240.65	1659.52	2013.02	2883.57	1685.43	1499.39	2266.12	2226.3		0.276873	0.21795	0.428613	0.417985	0.973168	1.1389	1.12937	1.02999	1.56943	1.16238	1.40999	2.01975	1.18053	1.05022	1.58727	1.55938		0.787186	1.1703	0.740642	0.889619	0.975204	0.912	1.43246	0.982428
813	Q9NZ63	C9orf78	Telomere length and silencing protein 1 homolog OS=Homo sapiens OX=9606 GN=C9orf78 PE=1 SV=1			2	30.6531	54.9239	55.1968	37.6954	71.4814	101.188	56.7837	60.0223	79.4438	96.4419	80.8361	95.7669	108.03	84.7285	137.852	82.0034		0.423373	0.758596	0.762365	0.52064	0.987284	1.39758	0.784283	0.829014	1.09726	1.33203	1.11649	1.32271	1.49208	1.17025	1.90398	1.13261		1.79179	1.41559	1.21396	0.784305	0.682927	1.05703	1.1847	0.594866
814	P00918	CA2	Carbonic anhydrase 2 OS=Homo sapiens OX=9606 GN=CA2 PE=1 SV=2			2	32.678	40.2448	88.6064	66.947	52.4211	76.9799	106.424	73.2781	101.513	67.3581	106.442	198.65	75.7545	60.7672	81.1582	86.877		0.498204	0.613566	1.35088	1.02066	0.799204	1.17362	1.62252	1.11719	1.54765	1.02693	1.6228	3.02859	1.15494	0.926447	1.23733	1.32451		1.23156	1.46849	0.663542	0.80216	0.755555	0.688549	1.86627	1.07046
815	Q9H8G2	CAAP1	Caspase activity and apoptosis inhibitor 1 OS=Homo sapiens OX=9606 GN=CAAP1 PE=1 SV=2			5	382.904	340.043	629.515	584.033	767.063	897.659	943.744	861.569	723.885	609.728	805.333	949.211	1083.11	715.922	1047.85	1066.37		0.517969	0.45999	0.85157	0.790045	1.03764	1.2143	1.27664	1.16548	0.979228	0.824803	1.08941	1.28404	1.46517	0.968456	1.41747	1.44252		0.888063	1.17025	0.8423	0.660987	0.927751	0.912927	1.17866	1.01767
816	Q9Y6J0	CABIN1	Calcineurin-binding protein cabin-1 OS=Homo sapiens OX=9606 GN=CABIN1 PE=1 SV=1			13	307.683	209.751	449.552	382.362	1384.9	1233.75	1158.79	1137.4	1798.53	1307.32	1631.43	1738.85	1465.63	1060.89	1824	1445.71		0.248294	0.169265	0.36278	0.308559	1.11759	0.995613	0.935122	0.917861	1.45138	1.05498	1.31653	1.40322	1.18274	0.856119	1.47193	1.16666		0.681711	0.890859	0.726883	0.723846	0.85054	0.981541	1.06584	0.792604
817	Q8TDN4	CABLES1	CDK5 and ABL1 enzyme substrate 1 OS=Homo sapiens OX=9606 GN=CABLES1 PE=1 SV=2			1	27.7809	24.2036	33.094	29.8821	77.0995	93.8214	63.8434	54.3551	99.5172	72.3229	76.7871	88.3536	101.896	64.4584	97.6983	83.661		0.362801	0.316084	0.432187	0.390241	1.00687	1.22525	0.833754	0.709843	1.29963	0.944491	1.00279	1.15384	1.3307	0.841786	1.27588	1.09256		0.871232	1.21689	0.726738	0.63259	0.902946	0.851382	1.15063	0.85632
818	Q9BTV7	CABLES2	CDK5 and ABL1 enzyme substrate 2 OS=Homo sapiens OX=9606 GN=CABLES2 PE=1 SV=3			1	85.035	52.2992	138.366	165.034	226.594	249.01	326.379	276.608	333.924	265.66	474.202	547.43	346.686	256.468	524.891	449.917		0.3428	0.210833	0.557793	0.665299	0.913465	1.00383	1.31573	1.11509	1.34614	1.07095	1.91164	2.20685	1.39759	1.0339	2.11599	1.81374		0.615031	1.09893	0.79557	0.73977	1.19274	0.847506	1.15442	0.857163
819	Q5VU97	CACHD1	VWFA and cache domain-containing protein 1 OS=Homo sapiens OX=9606 GN=CACHD1 PE=2 SV=2			4	84.8553	54.7599	177.318	147.594	280.677	301.12	282.652	288.699	307.513	238.553	348.302	392.454	362.107	285.75	455.129	362.198		0.327895	0.211601	0.685186	0.570328	1.08458	1.16358	1.09221	1.11558	1.18828	0.921808	1.3459	1.51651	1.39924	1.10419	1.75869	1.39959		0.645333	1.07283	0.775749	0.789131	0.832369	1.02139	1.12676	0.795814
820	P54289	CACNA2D1	Voltage-dependent calcium channel subunit alpha-2/delta-1 OS=Homo sapiens OX=9606 GN=CACNA2D1 PE=1 SV=3			10	421.45	362.504	777.551	867.537	1505.82	2772.45	2150.37	1882.56	3467.46	2865.55	2392.04	3766.95	2688.92	3172.58	2464.74	3196.09		0.208544	0.179376	0.384752	0.42928	0.745119	1.37188	1.06406	0.93154	1.71579	1.41795	1.18364	1.86398	1.33055	1.56987	1.21962	1.58151		0.860135	1.84116	0.826412	1.17987	1.11573	0.875459	1.57479	1.29673
821	Q9NY47	CACNA2D2	Voltage-dependent calcium channel subunit alpha-2/delta-2 OS=Homo sapiens OX=9606 GN=CACNA2D2 PE=1 SV=2			2	21.2297	27.214	59.223	63.9129	102.953	169.273	166.139	149.418	217.111	180.838	169.412	274.404	182.544	190.293	177.532	223.321		0.162109	0.207805	0.452224	0.488036	0.786144	1.29256	1.26863	1.14095	1.65785	1.38087	1.29362	2.09534	1.3939	1.45307	1.35563	1.70527		1.28188	1.64418	0.832929	1.04245	1.07919	0.899355	1.61974	1.25792
822	Q8WUQ7	CACTIN	Cactin OS=Homo sapiens OX=9606 GN=CACTIN PE=1 SV=3			6	610.022	548.938	787.911	618.945	1088.35	1324.62	931.563	926.082	881.544	1053.99	924.937	1056.81	1161.08	828.345	1060.29	1086.24		0.652256	0.586943	0.842461	0.661797	1.1637	1.41633	0.996059	0.990198	0.942577	1.12696	0.988974	1.12998	1.24147	0.885695	1.1337	1.16144		0.899866	1.21709	1.19562	0.713426	0.785552	0.994116	1.14258	1.02447
823	Q86Y37	CACUL1	CDK2-associated and cullin domain-containing protein 1 OS=Homo sapiens OX=9606 GN=CACUL1 PE=1 SV=1			1	53.8217	58.3826	54.8179	51.0568	142.176	173.676	114.699	88.7926	264.678	196.411	163.158	176.871	211.464	171.93	156.778	138.175		0.320301	0.347443	0.326229	0.303846	0.84611	1.03357	0.68259	0.528418	1.57514	1.16887	0.970977	1.05258	1.25845	1.02318	0.933008	0.822299		1.08474	1.22156	0.742075	0.813046	0.931389	0.774136	1.08405	0.881342
824	Q9HB71	CACYBP	Calcyclin-binding protein OS=Homo sapiens OX=9606 GN=CACYBP PE=1 SV=2			9	334.815	321.9	480.143	349.537	939.212	942.831	845.611	695.915	1150.04	773.855	1018.64	1000.86	1111.27	857.092	1273.73	870.109		0.378821	0.364209	0.54325	0.395478	1.06266	1.06675	0.956753	0.787382	1.30119	0.875566	1.15252	1.13241	1.25733	0.969743	1.44114	0.984471		0.961426	1.00385	0.672894	0.771273	0.727985	0.822973	0.982545	0.683119
825	P27708	CAD	CAD protein OS=Homo sapiens OX=9606 GN=CAD PE=1 SV=3			17	1172.52	725.694	997.044	797.153	3844.32	3702.64	2561.82	2773.02	4423.15	3939.01	3862.9	3958.45	4120.14	3041.85	4716.61	3738.38		0.345873	0.214067	0.29411	0.235146	1.13401	1.09221	0.755692	0.817992	1.30475	1.16194	1.13949	1.16767	1.21537	0.897292	1.39132	1.10276		0.618918	0.963146	0.890544	0.738288	0.799516	1.08244	1.02474	0.792599
826	Q9BY67	CADM1	Cell adhesion molecule 1 OS=Homo sapiens OX=9606 GN=CADM1 PE=1 SV=2			2	10.6712	3.7737	17.9394	36.2929	20.5958	42.9248	61.8277	34.836	142.138	91.5113	113.525	267.562	188.122	171.196	117.428	127.292		0.118068	0.0417529	0.198485	0.401551	0.227876	0.474928	0.684073	0.385432	1.57264	1.0125	1.25606	2.96035	2.08142	1.89414	1.29924	1.40838		0.353634	2.08415	0.64382	0.910026	2.02308	0.563437	2.35686	1.084
827	Q8NFZ8	CADM4	Cell adhesion molecule 4 OS=Homo sapiens OX=9606 GN=CADM4 PE=1 SV=1			1	5.71284	3.26323	19.2238	21.5395	12.2864	27.9889	42.2097	25.7173	66.2354	37.586	72.8178	101.614	61.931	50.4338	89.9683	63.0245		0.156339	0.0893022	0.526083	0.589455	0.336232	0.76595	1.15512	0.703785	1.81261	1.02859	1.99275	2.78079	1.69482	1.38018	2.46209	1.72474		0.57121	2.27804	0.567461	0.814355	1.12046	0.609275	1.39546	0.700519
828	Q86UW7	CADPS2	Calcium-dependent secretion activator 2 OS=Homo sapiens OX=9606 GN=CADPS2 PE=1 SV=2			6	187.374	146.23	224.278	190.628	748.371	658.957	544.814	565.576	791.191	663.069	772.583	744.747	813.168	614.669	1015.17	814.47		0.295065	0.230274	0.353179	0.300189	1.17849	1.03769	0.85794	0.890634	1.24592	1.04416	1.21662	1.17278	1.28053	0.967943	1.59863	1.28258		0.780418	0.880522	0.838064	0.755894	0.849963	1.03811	0.96397	0.802299
829	Q9P1Z2	CALCOCO1	Calcium-binding and coiled-coil domain-containing protein 1 OS=Homo sapiens OX=9606 GN=CALCOCO1 PE=1 SV=2			4	90.952	90.2132	155.739	164.155	223.607	280.989	290.758	264.755	235.331	195.373	325.634	418.645	316.255	312.191	393.683	356.719		0.420031	0.416619	0.719228	0.758095	1.03265	1.29765	1.34277	1.22268	1.0868	0.902265	1.50383	1.93337	1.46052	1.44175	1.81809	1.64739		0.991877	1.25662	0.830205	0.98715	1.05404	0.910568	1.28563	0.906107
830	Q13137	CALCOCO2	Calcium-binding and coiled-coil domain-containing protein 2 OS=Homo sapiens OX=9606 GN=CALCOCO2 PE=1 SV=1			6	226.182	211.834	1453.38	1246.22	530.218	834.264	1133.69	1054.6	706.621	589.435	1251.31	1886.92	963.442	1082.13	1718.79	1792		0.372859	0.349206	2.39588	2.05438	0.874059	1.37528	1.86888	1.7385	1.16486	0.971678	2.06277	3.11057	1.58822	1.78388	2.83341	2.95409		0.936564	1.57344	0.83416	1.12319	0.857463	0.930237	1.50796	1.04259
831	Q05682	CALD1	Caldesmon OS=Homo sapiens OX=9606 GN=CALD1 PE=1 SV=3			7	452.419	639.523	875.034	806.207	746.822	1136.21	1184.34	1036.94	1226.86	949.944	1455.21	2148.19	961.544	948.767	1043.52	1065.33		0.534199	0.755124	1.03321	0.951938	0.881818	1.34159	1.39842	1.22438	1.44863	1.12166	1.71826	2.5365	1.13535	1.12027	1.23215	1.2579		1.41356	1.52139	0.774289	0.986712	0.921344	0.875542	1.47621	1.0209
832	Q8N5C1	CALHM5	Calcium homeostasis modulator protein 5 OS=Homo sapiens OX=9606 GN=CALHM5 PE=2 SV=1			4	26.7149	17.1557	34.83	34.002	65.2878	98.9952	82.6952	55.7568	164.268	140.921	96.7406	128.939	121.439	125.612	100.919	90.2475		0.282915	0.181681	0.368855	0.360086	0.691407	1.04837	0.875754	0.590473	1.73962	1.49237	1.0245	1.36548	1.28606	1.33025	1.06875	0.955734		0.642177	1.51629	0.857873	1.03436	0.976227	0.674245	1.33283	0.894257
833	P0DP23	CALM1	Calmodulin-1 OS=Homo sapiens OX=9606 GN=CALM1 PE=1 SV=1			5	60.5128	37.2427	50.9093	48.2868	125.685	185.229	114.751	119.92	707.394	378.879	297.193	584.046	194.269	222.887	303.598	232.434		0.222502	0.136939	0.18719	0.177548	0.462136	0.681076	0.421933	0.440939	2.60105	1.39312	1.09276	2.1475	0.714316	0.819542	1.11631	0.854646		0.615452	1.47376	0.535598	1.14731	0.948487	1.04505	1.96521	0.765598
834	P27797	CALR	Calreticulin OS=Homo sapiens OX=9606 GN=CALR PE=1 SV=1			9	677.115	585.999	857.299	776.378	1193.53	1774.98	1751.25	1194.9	2672.91	1716.77	1925.77	3356.6	2032.71	1578.15	1347.15	1872.85		0.411854	0.356433	0.52145	0.47223	0.725962	1.07963	1.06519	0.726796	1.62579	1.04422	1.17135	2.04165	1.23639	0.959907	0.819401	1.13916		0.865435	1.48717	0.642285	0.776377	0.905609	0.682313	1.74299	1.39023
835	O43852	CALU	Calumenin OS=Homo sapiens OX=9606 GN=CALU PE=1 SV=2			7	214.213	241.771	365.067	348.402	428.455	644.048	675.022	538.593	873.854	567.498	856.817	1438.87	696.454	668.193	677.052	763.546		0.387194	0.437006	0.659866	0.629744	0.774441	1.16413	1.22012	0.973518	1.57951	1.02576	1.54871	2.60079	1.25886	1.20777	1.22379	1.38013		1.12865	1.50319	0.64942	0.959422	0.954351	0.79789	1.67932	1.12775
836	Q14012	CAMK1	Calcium/calmodulin-dependent protein kinase type 1 OS=Homo sapiens OX=9606 GN=CAMK1 PE=1 SV=1			4	160.852	138.837	224.431	216.831	749.808	783.381	778.512	716.721	1357.54	997.71	1261.3	1501.33	842.946	752.729	1424.64	1080.8		0.206807	0.178503	0.288551	0.27878	0.964028	1.00719	1.00093	0.921488	1.74539	1.28276	1.62165	1.93026	1.08378	0.967784	1.83166	1.38958		0.863135	1.04478	0.73494	0.892974	0.966137	0.920629	1.1903	0.758648
837	Q8IU85	CAMK1D	Calcium/calmodulin-dependent protein kinase type 1D OS=Homo sapiens OX=9606 GN=CAMK1D PE=1 SV=1			2	30.7551	23.5224	19.8154	19.0177	138.485	140.492	69.789	49.8162	198.173	143.672	76.2472	102.523	161.015	123.634	76.3146	75.465		0.232804	0.178056	0.149995	0.143957	1.04828	1.06347	0.528276	0.37709	1.50009	1.08754	0.577162	0.77606	1.21882	0.935862	0.577673	0.571241		0.764829	1.01449	0.724983	0.767842	0.959743	0.713812	1.34461	0.988867
838	Q13554	CAMK2B	Calcium/calmodulin-dependent protein kinase type II subunit beta OS=Homo sapiens OX=9606 GN=CAMK2B PE=1 SV=3			4	33.6587	31.5015	54.067	54.976	98.1822	125.724	122.398	138.27	173.193	141.987	158.751	220.088	129.159	119.926	224.672	176.595		0.310081	0.290207	0.498092	0.506466	0.904503	1.15823	1.12759	1.27381	1.59554	1.30805	1.46249	2.02756	1.18988	1.10482	2.06979	1.62688		0.93591	1.28052	0.81982	0.928514	1.01681	1.12968	1.38637	0.786012
839	Q13557	CAMK2D	Calcium/calmodulin-dependent protein kinase type II subunit delta OS=Homo sapiens OX=9606 GN=CAMK2D PE=1 SV=3			4	344.383	271.661	351.352	376.807	1151.96	1314.79	917.016	995.926	1607.25	1448.78	1153.16	1561.99	1366.46	1213.52	1484.44	1406.58		0.308169	0.243094	0.314405	0.337183	1.03082	1.17653	0.820586	0.891198	1.43824	1.29643	1.0319	1.39774	1.22277	1.08591	1.32834	1.25867		0.788834	1.14135	0.901403	0.888076	1.07245	1.08605	1.35453	0.947549
840	Q13555	CAMK2G	Calcium/calmodulin-dependent protein kinase type II subunit gamma OS=Homo sapiens OX=9606 GN=CAMK2G PE=1 SV=4			4	126.143	108.651	132.612	133.313	386.355	443.936	289.469	266.89	525.534	503.968	341.598	452.782	442.944	358.064	379.555	386.629		0.340702	0.293458	0.358175	0.360068	1.04351	1.19904	0.781833	0.720849	1.41943	1.36118	0.922629	1.22293	1.19636	0.967103	1.02515	1.04425		0.861332	1.14904	0.958964	0.808373	1.00529	0.921999	1.32548	1.01864
841	Q16566	CAMK4	Calcium/calmodulin-dependent protein kinase type IV OS=Homo sapiens OX=9606 GN=CAMK4 PE=1 SV=1			3	71.2053	110.547	133.305	98.7559	186.519	246.199	193.089	155.056	205.65	190.041	168.763	203.987	258.54	198.288	248.965	209.786		0.394536	0.612521	0.73862	0.547189	1.03347	1.36415	1.06987	0.859138	1.13947	1.05298	0.935086	1.13026	1.43252	1.09868	1.37947	1.16239		1.55251	1.31997	0.924099	0.766953	0.740827	0.803029	1.20872	0.842632
842	Q8N5S9	CAMKK1	Calcium/calmodulin-dependent protein kinase kinase 1 OS=Homo sapiens OX=9606 GN=CAMKK1 PE=1 SV=2			2	19.5717	25.0842	36.7452	30.5008	50.0491	60.7719	64.3687	60.1036	62.6379	54.5713	66.4227	100.684	58.8429	42.6858	63.7935	55.382		0.409661	0.525044	0.769124	0.638421	1.04759	1.27203	1.34732	1.25804	1.31109	1.14225	1.39031	2.10744	1.23166	0.893468	1.33528	1.15922		1.28166	1.21425	0.871219	0.72542	0.830062	0.93374	1.51581	0.868145
843	Q96RR4	CAMKK2	Calcium/calmodulin-dependent protein kinase kinase 2 OS=Homo sapiens OX=9606 GN=CAMKK2 PE=1 SV=2			6	115.594	80.3031	158.877	132.909	434.356	382.797	380.964	366.536	502.678	403.856	495.427	556.674	435.532	357.159	585.125	482.38		0.310703	0.215845	0.427043	0.357244	1.1675	1.02891	1.02399	0.985206	1.35114	1.08552	1.33165	1.49627	1.17066	0.960002	1.57275	1.29658		0.6947	0.881298	0.803409	0.820052	0.836553	0.962128	1.12362	0.824405
844	Q7Z624	CAMKMT	Calmodulin-lysine N-methyltransferase OS=Homo sapiens OX=9606 GN=CAMKMT PE=1 SV=2			1	10.8768	11.4435	16.2084	14.0314	29.9567	35.1491	32.7928	30.061	38.5444	36.807	46.018	47.5511	38.425	30.3691	63.9339	41.1635		0.369322	0.388564	0.550357	0.476436	1.01718	1.19349	1.11348	1.02072	1.30878	1.24978	1.56254	1.6146	1.30472	1.03118	2.17088	1.39771		1.0521	1.17333	0.954925	0.790347	0.865687	0.916695	1.03332	0.643845
845	Q5T5Y3	CAMSAP1	Calmodulin-regulated spectrin-associated protein 1 OS=Homo sapiens OX=9606 GN=CAMSAP1 PE=1 SV=2			6	175.616	252.26	262.239	213.546	516.088	583.608	422.325	420.646	502.002	491.84	500.941	570.955	678.767	534.687	667.663	518.522		0.375153	0.538881	0.560198	0.45618	1.10247	1.24671	0.902176	0.898589	1.07238	1.05067	1.07012	1.21968	1.44999	1.1422	1.42627	1.10767		1.43643	1.13083	0.979757	0.787733	0.814318	0.996024	1.13976	0.776622
846	Q08AD1	CAMSAP2	Calmodulin-regulated spectrin-associated protein 2 OS=Homo sapiens OX=9606 GN=CAMSAP2 PE=1 SV=3			6	91.4743	157.203	236.598	159.681	267.966	362.191	256.512	236.732	340.91	379.088	254.693	348.127	420.089	334.556	330.327	323.943		0.326566	0.561219	0.844662	0.570066	0.956646	1.29303	0.915755	0.84514	1.21706	1.35335	0.909261	1.24282	1.49973	1.19437	1.17928	1.15649		1.71855	1.35163	1.11199	0.796393	0.674904	0.922889	1.36685	0.980674
847	Q9P1Y5	CAMSAP3	Calmodulin-regulated spectrin-associated protein 3 OS=Homo sapiens OX=9606 GN=CAMSAP3 PE=1 SV=2			4	60.8747	63.9001	107.033	92.3469	251.629	294.662	216.472	239.436	374.413	376.945	334.672	354.649	268.365	250.637	346.772	323.848		0.254897	0.267565	0.448174	0.386679	1.05363	1.23382	0.906422	1.00258	1.56776	1.57836	1.40135	1.485	1.12371	1.04948	1.45202	1.35603		1.0497	1.17102	1.00676	0.933941	0.862789	1.10608	1.05969	0.933893
848	Q86VP6	CAND1	Cullin-associated NEDD8-dissociated protein 1 OS=Homo sapiens OX=9606 GN=CAND1 PE=1 SV=2			19	594.883	482.878	837.536	733.742	2676.87	2889.92	2190.85	2431.16	4369.89	3558.45	3065.1	3971.53	2638.72	2459.83	3704.29	3150.02		0.231464	0.187884	0.325878	0.285493	1.04155	1.12444	0.852441	0.945943	1.70029	1.38456	1.1926	1.54529	1.0267	0.957098	1.44131	1.22565		0.811719	1.07959	0.814311	0.932206	0.876072	1.10969	1.29573	0.850371
849	O75155	CAND2	Cullin-associated NEDD8-dissociated protein 2 OS=Homo sapiens OX=9606 GN=CAND2 PE=1 SV=3			10	559.648	480.11	763.357	713.253	2543.57	2601.26	2188.59	2448.95	3446.97	2992.76	2987.48	3487.31	2408.65	2073.93	3659.13	2818.24		0.249875	0.214363	0.340829	0.318458	1.13567	1.16143	0.977176	1.09342	1.53903	1.33623	1.33387	1.55704	1.07543	0.925982	1.63375	1.25831		0.857879	1.02268	0.868229	0.861034	0.934364	1.11896	1.16731	0.770194
850	Q8WVQ1	CANT1	Soluble calcium-activated nucleotidase 1 OS=Homo sapiens OX=9606 GN=CANT1 PE=1 SV=1			3	51.4512	37.3843	96.4361	90.4769	150.208	179.059	197.202	124.756	374.457	161.182	223.804	488.184	536.651	238.076	246.684	250.754		0.184949	0.134383	0.346653	0.325232	0.539944	0.643653	0.708871	0.448453	1.34604	0.579392	0.804495	1.75485	1.92907	0.855798	0.886741	0.901371		0.726597	1.19207	0.430442	0.443633	0.938206	0.632631	2.1813	1.0165
851	P27824	CANX	Calnexin OS=Homo sapiens OX=9606 GN=CANX PE=1 SV=2			6	66.6836	43.8112	89.7001	88.877	168.907	246.981	287.154	190.152	649.694	259.12	386.879	697.094	580.377	346.418	380.368	388.421		0.181989	0.119567	0.244804	0.242558	0.460971	0.674046	0.783684	0.518952	1.77311	0.707176	1.05585	1.90247	1.58393	0.945424	1.03808	1.06006		0.657001	1.46223	0.398834	0.596884	0.990824	0.662195	1.80184	1.02117
852	Q01518	CAP1	Adenylyl cyclase-associated protein 1 OS=Homo sapiens OX=9606 GN=CAP1 PE=1 SV=5			6	455.459	388.132	529.899	532.52	851.009	1173.99	971.859	805.12	1255.89	1117.61	968.893	1428.46	962.845	829.096	791.304	905.377		0.516803	0.440408	0.601269	0.604243	0.965628	1.33211	1.10276	0.913559	1.42504	1.26814	1.09939	1.62085	1.09253	0.940764	0.897882	1.02732		0.852178	1.37953	0.889895	0.86109	1.00495	0.828433	1.47432	1.14416
853	P07384	CAPN1	Calpain-1 catalytic subunit OS=Homo sapiens OX=9606 GN=CAPN1 PE=1 SV=1			9	345.629	252.436	521.035	465.308	1273.77	1341.91	1299.19	1403.89	1654.76	1556.76	1648.8	2051.19	1298.58	1092.08	1752.69	1802.35		0.302339	0.220818	0.455775	0.407028	1.11423	1.17383	1.13647	1.22805	1.4475	1.36177	1.44229	1.79428	1.13593	0.955296	1.53316	1.5766		0.730367	1.05349	0.940777	0.84098	0.893046	1.08059	1.24405	1.02833
854	O75808	CAPN15	Calpain-15 OS=Homo sapiens OX=9606 GN=CAPN15 PE=1 SV=1			1	25.4751	33.0802	39.4987	37.7252	77.0053	99.6758	74.8163	99.6914	176.801	130.256	197.493	123.3	146.49	143.81	284.292	122.357		0.239331	0.310779	0.371079	0.354417	0.723443	0.936426	0.702878	0.936572	1.66099	1.22372	1.85539	1.15837	1.37623	1.35105	2.67084	1.14951		1.29853	1.2944	0.736738	0.981705	0.9551	1.33248	0.624326	0.430392
855	P17655	CAPN2	Calpain-2 catalytic subunit OS=Homo sapiens OX=9606 GN=CAPN2 PE=1 SV=6			8	191.449	152.288	277.521	295.16	856.127	805.933	800.951	861.09	810.419	788.412	846.307	957.586	1008.58	708.251	1187.01	1064.84		0.267147	0.212502	0.387251	0.411864	1.19463	1.12459	1.11764	1.20156	1.13085	1.10014	1.18093	1.33621	1.40737	0.988289	1.65635	1.48587		0.795449	0.941371	0.972845	0.702226	1.06356	1.07508	1.13149	0.897078
856	Q9Y6W3	CAPN7	Calpain-7 OS=Homo sapiens OX=9606 GN=CAPN7 PE=1 SV=1			6	163.567	126.055	269.448	233.206	678.619	628.473	571.715	558.802	738.902	597.27	884.955	944.712	807.215	564.047	1037.61	881.106		0.273947	0.211121	0.451279	0.39058	1.13657	1.05259	0.957525	0.935898	1.23753	1.00033	1.48215	1.58223	1.35195	0.944682	1.73782	1.4757		0.770663	0.926106	0.808321	0.698757	0.865495	0.977414	1.06753	0.849169
857	P04632	CAPNS1	Calpain small subunit 1 OS=Homo sapiens OX=9606 GN=CAPNS1 PE=1 SV=1			4	132.281	113.371	217.454	219.807	579.344	592.798	626.295	702.922	719.196	694.454	678.683	842.333	692.268	553.382	841.057	897.308		0.249224	0.213596	0.409694	0.414127	1.09151	1.11686	1.17997	1.32434	1.355	1.30838	1.27867	1.587	1.30427	1.0426	1.58459	1.69057		0.857047	1.02322	0.965598	0.799375	1.01082	1.12235	1.24113	1.06688
858	Q14444	CAPRIN1	Caprin-1 OS=Homo sapiens OX=9606 GN=CAPRIN1 PE=1 SV=2			18	1302.01	1726.5	1934.13	1899	2560.57	5177.86	2602	3381.34	2983.05	3889.27	2766.29	4482.29	4235.08	4550.21	3482.68	4434.74		0.47001	0.623245	0.698197	0.685516	0.924334	1.86914	0.93929	1.22062	1.07684	1.40398	0.998597	1.61805	1.52881	1.64257	1.2572	1.60089		1.32603	2.02215	1.30379	1.07441	0.981837	1.29952	1.62033	1.27337
859	Q6IMN6	CAPRIN2	Caprin-2 OS=Homo sapiens OX=9606 GN=CAPRIN2 PE=1 SV=1			9	706.221	829.314	710.465	670.489	1212.61	2137.39	906.943	1010.31	1685.87	1870.77	1027.51	1416.3	1804.49	1769.25	1264.11	1341.03		0.522238	0.613263	0.525376	0.495815	0.896703	1.58056	0.670668	0.747106	1.24667	1.3834	0.759825	1.04733	1.33439	1.30833	0.934787	0.991668		1.1743	1.76264	1.10968	0.980471	0.943733	1.11397	1.37838	1.06085
860	P52907	CAPZA1	F-actin-capping protein subunit alpha-1 OS=Homo sapiens OX=9606 GN=CAPZA1 PE=1 SV=3			5	330.18	263.341	313.303	291.952	899.995	1152.43	712.649	660.791	1161.62	1076.06	806.914	1160.81	989.436	894.54	953.675	1001.36		0.390603	0.311533	0.370638	0.34538	1.0647	1.36333	0.843065	0.781716	1.3742	1.27298	0.95458	1.37324	1.1705	1.05824	1.1282	1.18461		0.797568	1.28048	0.926344	0.904091	0.931852	0.927232	1.43858	1.05
861	P47755	CAPZA2	F-actin-capping protein subunit alpha-2 OS=Homo sapiens OX=9606 GN=CAPZA2 PE=1 SV=3			3	70.6122	68.79	76.8656	89.4118	209.5	241.296	184.278	173.976	297.33	264.456	220.743	289.941	234.294	214.158	267.863	253.297		0.347956	0.338977	0.378771	0.440595	1.03236	1.18904	0.908068	0.857303	1.46516	1.30316	1.08776	1.42874	1.15453	1.05531	1.31995	1.24817		0.974194	1.15177	0.889436	0.914057	1.16322	0.944095	1.31348	0.945621
862	P47756	CAPZB	F-actin-capping protein subunit beta OS=Homo sapiens OX=9606 GN=CAPZB PE=1 SV=4			5	256.342	273.311	273.674	272.851	679.951	849.831	554.544	492.727	1098.55	975.313	729.588	990.07	814.311	784.35	920.41	800.745		0.359885	0.383708	0.384218	0.383062	0.954601	1.1931	0.778538	0.691752	1.54228	1.36927	1.02429	1.38998	1.14323	1.10117	1.29219	1.12419		1.0662	1.24984	0.887818	0.963207	0.996993	0.888526	1.35703	0.869987
863	Q9BWT7	CARD10	Caspase recruitment domain-containing protein 10 OS=Homo sapiens OX=9606 GN=CARD10 PE=1 SV=2			7	252.079	232.286	257.035	252.318	609.121	702.623	486.591	440.968	666.544	652.363	551.358	682.251	877.841	646.146	604.74	603.465		0.419156	0.386245	0.427397	0.419554	1.01284	1.16832	0.809102	0.73324	1.10833	1.08475	0.916797	1.13445	1.45967	1.07441	1.00556	1.00344		0.921481	1.1535	0.978725	0.736063	0.981648	0.90624	1.2374	0.997892
864	Q9BX69	CARD6	Caspase recruitment domain-containing protein 6 OS=Homo sapiens OX=9606 GN=CARD6 PE=1 SV=2			1	101.996	93.2733	143.456	100.996	273.518	291.559	220.411	236.622	256.51	241.314	279.277	294.098	377.888	276.629	322.359	297.133		0.40398	0.369431	0.568192	0.400019	1.08333	1.15479	0.872991	0.937198	1.01597	0.955782	1.10614	1.16485	1.49672	1.09566	1.27678	1.17687		0.91448	1.06596	0.940759	0.73204	0.704021	1.07355	1.05307	0.921746
865	Q9Y2G2	CARD8	Caspase recruitment domain-containing protein 8 OS=Homo sapiens OX=9606 GN=CARD8 PE=1 SV=1			1	9.7555	11.3649	18.7906	24.6262	42.1907	48.0714	47.9971	59.1459	39.3663	35.6706	67.0844	79.6307	52.0105	43.0875	64.6658	59.8391		0.272266	0.317183	0.524427	0.687292	1.1775	1.34162	1.33955	1.6507	1.09867	0.99553	1.87226	2.22241	1.45156	1.20253	1.80476	1.67005		1.16497	1.13938	0.90612	0.828438	1.31056	1.23228	1.18702	0.925359
866	Q9Y2V2	CARHSP1	Calcium-regulated heat-stable protein 1 OS=Homo sapiens OX=9606 GN=CARHSP1 PE=1 SV=2			1	10.7229	6.11795	16.033	10.839	19.5852	22.4857	25.4864	16.9919	30.5254	22.8329	33.1804	50.0331	20.7911	22.5933	25.1963	27.3476		0.525474	0.299809	0.785695	0.531163	0.959769	1.10191	1.24896	0.832685	1.49589	1.11892	1.626	2.45186	1.01886	1.10718	1.23474	1.34016		0.57055	1.1481	0.747997	1.08668	0.676043	0.666705	1.50791	1.08538
867	Q86X55	CARM1	Histone-arginine methyltransferase CARM1 OS=Homo sapiens OX=9606 GN=CARM1 PE=1 SV=3			6	277.069	166.036	253.045	216.841	1067.73	1001	710.059	772.951	1483	1203.07	1080.39	1252.16	1036.38	844.103	1134.91	1104.51		0.286808	0.171872	0.261939	0.224463	1.10526	1.03618	0.735017	0.800119	1.53513	1.24536	1.11836	1.29617	1.07281	0.873772	1.1748	1.14333		0.599259	0.937503	0.811241	0.814472	0.856927	1.08857	1.15899	0.973214
868	Q5VZK9	CARMIL1	F-actin-uncapping protein LRRC16A OS=Homo sapiens OX=9606 GN=CARMIL1 PE=1 SV=1			9	394.562	299.284	334.784	282.914	1353.13	1324.14	761.727	794.805	1689.73	1395.49	1055.64	1104.75	1555.44	1107.58	1262.41	1108.83		0.316101	0.239769	0.26821	0.226655	1.08405	1.06083	0.610253	0.636753	1.35372	1.11799	0.845719	0.885064	1.24613	0.887331	1.01137	0.888332		0.758522	0.978576	0.825866	0.712069	0.845064	1.04343	1.04652	0.878344
869	Q6F5E8	CARMIL2	Capping protein, Arp2/3 and myosin-I linker protein 2 OS=Homo sapiens OX=9606 GN=CARMIL2 PE=1 SV=2			5	70.5125	79.0789	151.685	140.253	175.395	206.556	283.304	242.708	216.111	194.581	333.591	413.656	187.508	164.669	347.108	288.709		0.434239	0.486994	0.934127	0.863725	1.08014	1.27204	1.74468	1.49468	1.33088	1.19829	2.05436	2.54743	1.15474	1.01409	2.13761	1.77797		1.12149	1.17766	0.900375	0.878197	0.924633	0.856705	1.24001	0.831756
870	Q8N4J0	CARNMT1	Carnosine N-methyltransferase OS=Homo sapiens OX=9606 GN=CARNMT1 PE=1 SV=1			2	83.7436	80.2998	118.788	111.841	223.082	214.509	213.418	179.697	194.647	178.99	206.236	271.951	243.779	177.447	224.041	219.827		0.449478	0.430994	0.637573	0.600286	1.19735	1.15134	1.14548	0.96449	1.04473	0.960696	1.10693	1.45965	1.30844	0.952414	1.2025	1.17988		0.958877	0.96157	0.919562	0.727901	0.941518	0.841996	1.31864	0.981191
871	P49589	CARS	Cysteine--tRNA ligase, cytoplasmic OS=Homo sapiens OX=9606 GN=CARS PE=1 SV=3			4	452.704	447.37	703.187	694.62	961.24	1314.61	1225.12	1116.68	1549.18	1259.69	1424.12	1943.02	1218.01	1093.49	1359.49	1273.74		0.433092	0.427989	0.672724	0.664528	0.919597	1.25766	1.17205	1.0683	1.48207	1.20512	1.36242	1.85884	1.16524	1.04612	1.30059	1.21856		0.988217	1.36762	0.813133	0.897768	0.987817	0.911486	1.36437	0.936925
872	Q9HA77	CARS2	Probable cysteine--tRNA ligase, mitochondrial OS=Homo sapiens OX=9606 GN=CARS2 PE=1 SV=1			5	131.44	101.495	173.455	157.86	604.217	664.897	507.119	588.654	763.922	651.172	758.956	825.685	569.539	526.562	936.461	794.127		0.254099	0.196209	0.335322	0.305174	1.16807	1.28537	0.980358	1.13798	1.47681	1.25884	1.46721	1.59621	1.10103	1.01794	1.81036	1.5352		0.772177	1.10043	0.852406	0.924541	0.910092	1.16078	1.08792	0.848009
873	Q6P4E1	CASC4	Protein CASC4 OS=Homo sapiens OX=9606 GN=CASC4 PE=1 SV=1			3	46.7404	36.5794	73.2328	104.953	93.9305	139.792	186.228	91.2098	410.482	169.627	234.477	455.672	570.894	286.555	203.083	250.817		0.166625	0.130402	0.261069	0.374148	0.334854	0.498346	0.663887	0.325155	1.46333	0.604706	0.83589	1.62443	2.03519	1.02154	0.723973	0.894141		0.782608	1.48825	0.413239	0.501941	1.43314	0.489775	1.94335	1.23505
874	O14936	CASK	Peripheral plasma membrane protein CASK OS=Homo sapiens OX=9606 GN=CASK PE=1 SV=3			4	299.21	207.872	535.444	968.537	755.884	1162.37	1299.96	953.723	2340.82	1625.33	2038.69	3736.45	1226.87	1888.69	2075.08	2279.8		0.2589	0.179867	0.463309	0.838055	0.654051	1.00577	1.12483	0.825237	2.02546	1.40636	1.76404	3.23307	1.06159	1.63424	1.79552	1.97266		0.694736	1.53776	0.694342	1.53944	1.80885	0.733656	1.83277	1.09866
875	Q8WXD9	CASKIN1	Caskin-1 OS=Homo sapiens OX=9606 GN=CASKIN1 PE=1 SV=1			1	0	3.96034	7.24259	5.51011	11.5504	20.2019	17.7896	14.4434	28.5825	22.6738	24.7551	29.0244	15.6366	13.2687	25.5796	15.7531		0	0.284051	0.519466	0.395206	0.828438	1.44896	1.27594	1.03594	2.05005	1.62625	1.77553	2.08174	1.12152	0.951681	1.83467	1.12987		NaN	1.74902	0.793276	0.848567	0.760793	0.811901	1.17246	0.615846
876	Q8WXE0	CASKIN2	Caskin-2 OS=Homo sapiens OX=9606 GN=CASKIN2 PE=1 SV=2			2	53.1103	39.7363	85.8429	67.963	170.387	176.644	185.704	171.023	211.534	178.502	224.527	282.338	221.203	151.828	291.311	239.353		0.323728	0.242208	0.523245	0.414261	1.03857	1.07671	1.13194	1.04245	1.28938	1.08804	1.36858	1.72096	1.34832	0.92545	1.77565	1.45895		0.748184	1.03672	0.843845	0.686374	0.791714	0.920944	1.25748	0.821641
877	P55212	CASP6	Caspase-6 OS=Homo sapiens OX=9606 GN=CASP6 PE=1 SV=2			1	25.3628	19.0286	25.4035	22.7459	59.7294	69.7213	56.5849	52.1596	73.191	59.2049	67.6414	90.9614	64.878	41.7595	65.2308	66.9406		0.454609	0.341074	0.455339	0.407703	1.07061	1.2497	1.01424	0.934922	1.31189	1.0612	1.21242	1.63042	1.16289	0.748508	1.16921	1.19986		0.750256	1.16729	0.80891	0.643662	0.895384	0.921794	1.34476	1.02621
878	P55210	CASP7	Caspase-7 OS=Homo sapiens OX=9606 GN=CASP7 PE=1 SV=1			1	7.86577	12.4117	14.8054	10.3086	57.325	55.4846	33.9447	34.9292	60.4425	50.6686	45.6967	47.2675	65.4832	53.356	64.4996	46.9652		0.164628	0.259772	0.309872	0.215755	1.19979	1.16127	0.710451	0.731056	1.26504	1.06048	0.956416	0.989292	1.37054	1.11672	1.34995	0.982965		1.57794	0.967895	0.838294	0.814804	0.696273	1.029	1.03437	0.728147
879	Q14790	CASP8	Caspase-8 OS=Homo sapiens OX=9606 GN=CASP8 PE=1 SV=1			6	234.044	202.555	235.306	172.498	833.103	976.361	515.891	578.46	959.379	875.21	604.927	713.108	927.348	830.078	892.113	679.351		0.316932	0.274291	0.318641	0.233589	1.12815	1.32214	0.698596	0.783324	1.29915	1.18517	0.819164	0.965658	1.25577	1.12405	1.20806	0.919946		0.865457	1.17196	0.912267	0.895109	0.733079	1.12128	1.17883	0.761508
880	Q9UKL3	CASP8AP2	CASP8-associated protein 2 OS=Homo sapiens OX=9606 GN=CASP8AP2 PE=1 SV=1			2	38.0889	19.764	71.1628	46.9715	76.1449	70.7719	107.086	72.4329	88.6838	52.8211	107.94	100.18	130.214	69.028	169.767	95.0758		0.457344	0.237312	0.854471	0.563999	0.914292	0.849777	1.28581	0.869721	1.06485	0.634237	1.29606	1.20289	1.56351	0.828838	2.03844	1.1416		0.518891	0.929437	0.595612	0.530112	0.660057	0.676399	0.928108	0.560037
881	P55211	CASP9	Caspase-9 OS=Homo sapiens OX=9606 GN=CASP9 PE=1 SV=3			1	3.90795	0	3.15351	6.87504	14.1358	15.9263	12.6165	12.2298	19.9914	17.1775	11.9152	21.6099	18.7716	14.9181	19.8973	19.2852		0.275175	0	0.222052	0.4841	0.995361	1.12144	0.88838	0.861151	1.40768	1.20954	0.838999	1.52164	1.32179	1.05045	1.40105	1.35795		0	1.12666	0.859244	0.794716	2.18012	0.96935	1.81364	0.969237
882	P20810	CAST	Calpastatin OS=Homo sapiens OX=9606 GN=CAST PE=1 SV=4			1	11.0757	10.4707	17.1329	11.9993	16.0517	22.2185	22.9183	23.1179	26.2261	21.425	25.3092	39.5641	19.3532	19.406	23.7831	20.888		0.609336	0.576051	0.942576	0.660148	0.883093	1.22236	1.26086	1.27184	1.44284	1.17871	1.3924	2.17664	1.06473	1.06763	1.30844	1.14917		0.945376	1.38418	0.816934	1.00273	0.700366	1.00871	1.56323	0.878271
883	A6NHX0	CASTOR2	Cytosolic arginine sensor for mTORC1 subunit 2 OS=Homo sapiens OX=9606 GN=CASTOR2 PE=1 SV=3			1	43.7976	36.8307	50.1794	41.151	124.392	135.681	100.16	93.6983	145.104	97.7141	117.14	151.708	149.602	102.535	139.146	140.762		0.378466	0.318264	0.433613	0.355596	1.0749	1.17245	0.865508	0.809671	1.25388	0.844373	1.01224	1.31095	1.29275	0.886031	1.2024	1.21636		0.84093	1.09075	0.673407	0.685385	0.820078	0.935486	1.2951	1.01161
884	Q86V15	CASZ1	Zinc finger protein castor homolog 1 OS=Homo sapiens OX=9606 GN=CASZ1 PE=1 SV=4			1	13.1192	16.6046	12.0088	7.44781	52.6324	82.6041	27.8795	26.3837	58.0941	61.5977	28.13	30.2199	53.5182	29.8357	21.9402	22.5554		0.295871	0.374475	0.270829	0.167967	1.18699	1.86293	0.628753	0.595018	1.31017	1.38918	0.634402	0.681534	1.20697	0.67287	0.494806	0.508681		1.26567	1.56945	1.06031	0.557487	0.620196	0.946348	1.07429	1.02804
885	P04040	CAT	Catalase OS=Homo sapiens OX=9606 GN=CAT PE=1 SV=3			2	74.0106	82.2912	148.216	112.484	172.43	217.591	175.726	143.516	210.466	204.511	150.532	259.246	191.741	141.67	182.474	186.835		0.456399	0.507463	0.914	0.693652	1.06332	1.34181	1.08365	0.885017	1.29788	1.26115	0.928282	1.59869	1.1824	0.873633	1.12526	1.15215		1.11188	1.26191	0.971706	0.738861	0.758919	0.816703	1.7222	1.0239
886	Q03135	CAV1	Caveolin-1 OS=Homo sapiens OX=9606 GN=CAV1 PE=1 SV=4			3	246.851	176.275	241.773	249.36	627.858	1015.73	581.017	554.304	1275.55	1038.37	683.973	1035.3	822.018	1020.07	921.138	813.096		0.332205	0.237226	0.325371	0.335581	0.844952	1.36694	0.781915	0.745965	1.7166	1.39741	0.92047	1.39328	1.10625	1.37278	1.23964	1.09424		0.714095	1.61777	0.814057	1.24093	1.03138	0.954024	1.51366	0.882708
887	P51636	CAV2	Caveolin-2 OS=Homo sapiens OX=9606 GN=CAV2 PE=1 SV=2			1	9.33058	6.60577	12.8112	7.0828	20.1409	22.758	15.9419	17.3852	21.6213	18.9109	17.1697	26.4125	25.6558	20.3764	25.963	26.3022		0.486293	0.344281	0.667697	0.369143	1.04971	1.18611	0.830864	0.906086	1.12686	0.985603	0.894854	1.37657	1.33713	1.06198	1.35315	1.37082		0.70797	1.12994	0.874642	0.794222	0.55286	1.09054	1.53832	1.01306
888	Q6NZI2	CAVIN1	Caveolae-associated protein 1 OS=Homo sapiens OX=9606 GN=CAVIN1 PE=1 SV=1			11	1398.9	1266.38	1390.38	1391.09	3790.24	5268.44	2660.25	2440.36	4766	4473.65	2919.03	4059.56	5075.93	4445.12	3298.63	3171.21		0.372269	0.337003	0.370002	0.370191	1.00864	1.40201	0.707934	0.649418	1.26831	1.19051	0.776799	1.08031	1.35078	1.18292	0.877816	0.843908		0.905268	1.39	0.938659	0.875725	1.00051	0.917342	1.39072	0.961372
889	Q8N350	CBARP	Voltage-dependent calcium channel beta subunit-associated regulatory protein OS=Homo sapiens OX=9606 GN=CBARP PE=1 SV=3			1	17.8792	8.83401	19.1865	23.3313	36.078	48.4347	26.8783	28.6163	87.475	57.6509	39.7544	60.7414	76.9154	50.327	50.8397	45.3908		0.327536	0.161834	0.351485	0.427416	0.660928	0.887295	0.492395	0.524234	1.60249	1.05613	0.728277	1.11275	1.40905	0.921961	0.931353	0.831533		0.494094	1.3425	0.659056	0.654316	1.21603	1.06466	1.52792	0.892822
890	O43439	CBFA2T2	Protein CBFA2T2 OS=Homo sapiens OX=9606 GN=CBFA2T2 PE=1 SV=1			1	74.4443	43.14	96.7189	72.5472	306.311	291.191	243.179	231.721	455.548	322.86	382.74	346.807	367.546	265.356	468.037	318.001		0.247354	0.14334	0.321365	0.241051	1.01777	0.967533	0.808005	0.769934	1.51364	1.07276	1.27172	1.15233	1.22124	0.881692	1.55513	1.05661		0.579494	0.950638	0.708729	0.721967	0.750083	0.952882	0.906116	0.679436
891	Q13951	CBFB	Core-binding factor subunit beta OS=Homo sapiens OX=9606 GN=CBFB PE=1 SV=2			2	38.8521	53.3949	65.7399	67.8547	129.724	173.038	158.013	155.649	200.861	171.389	232.026	302.819	170.156	175.435	357.875	225.646		0.28801	0.395816	0.487329	0.503006	0.961643	1.28273	1.17135	1.15382	1.48898	1.27051	1.72001	2.2448	1.26137	1.3005	2.65292	1.67271		1.37431	1.33389	0.853272	1.03102	1.03217	0.985039	1.30511	0.630516
892	Q13191	CBLB	E3 ubiquitin-protein ligase CBL-B OS=Homo sapiens OX=9606 GN=CBLB PE=1 SV=2			1	13.992	12.9503	24.1232	20.6163	55.3747	59.605	48.0346	46.2985	50.2054	45.5901	57.4497	72.2344	59.1378	55.4785	66.5421	84.2936		0.313178	0.289862	0.539941	0.461447	1.23943	1.33412	1.07514	1.03628	1.12373	1.02043	1.28588	1.6168	1.32366	1.24176	1.48939	1.88671		0.92555	1.07639	0.908072	0.938122	0.854625	0.963857	1.25735	1.26677
893	Q75N03	CBLL1	E3 ubiquitin-protein ligase Hakai OS=Homo sapiens OX=9606 GN=CBLL1 PE=1 SV=1			2	174.531	156.201	230.637	213.159	393.128	510.753	378.155	396.783	390.081	427.804	371.566	477.524	506.262	400.753	410.76	481.547		0.47686	0.426778	0.630155	0.582401	1.07412	1.3955	1.03321	1.08411	1.06579	1.16886	1.01521	1.30471	1.38323	1.09495	1.12229	1.3157		0.894976	1.2992	1.09671	0.791592	0.924219	1.04926	1.28517	1.17233
894	P16152	CBR1	Carbonyl reductase [NADPH] 1 OS=Homo sapiens OX=9606 GN=CBR1 PE=1 SV=3			4	112.093	81.7997	174.751	147.675	347	364.525	350.905	311.339	414.861	340.002	420.28	534.33	452.986	334.161	445.005	443.768		0.337899	0.246581	0.526779	0.44516	1.04602	1.09884	1.05779	0.938517	1.25058	1.02492	1.26691	1.61071	1.36551	1.00731	1.34145	1.33772		0.729749	1.0505	0.819556	0.737685	0.84506	0.887246	1.27137	0.99722
895	O75828	CBR3	Carbonyl reductase [NADPH] 3 OS=Homo sapiens OX=9606 GN=CBR3 PE=1 SV=3			2	54.3313	53.2236	62.9769	57.8123	227.295	240.621	170.704	169.969	317.604	250.21	243.972	265.139	249.173	237.183	333.578	247.019		0.256158	0.250935	0.29692	0.27257	1.07164	1.13447	0.804825	0.801359	1.49742	1.17967	1.15026	1.25006	1.17479	1.11826	1.57273	1.16463		0.979612	1.05863	0.787805	0.951881	0.917992	0.995694	1.08676	0.740513
896	Q5RIA9	CBWD5	COBW domain-containing protein 5 OS=Homo sapiens OX=9606 GN=CBWD5 PE=2 SV=1			1	36.6673	28.8536	40.9179	34.524	100.909	115.964	90.7482	83.3297	150.849	128.628	121.31	155.841	131.231	103.459	168.911	119.627		0.349498	0.275021	0.390013	0.329069	0.961825	1.10532	0.864976	0.794266	1.43783	1.22603	1.15628	1.48542	1.25084	0.986131	1.60999	1.14024		0.786903	1.14919	0.852694	0.788373	0.843738	0.918252	1.28465	0.708225
897	P83916	CBX1	Chromobox protein homolog 1 OS=Homo sapiens OX=9606 GN=CBX1 PE=1 SV=1			5	191.969	190.922	327.788	277.293	610.475	670.114	578.822	569.623	749.184	621.958	898.428	821.587	755.969	715.048	1294.65	764.436		0.33276	0.330945	0.568189	0.480661	1.0582	1.16158	1.00333	0.987387	1.29864	1.07811	1.55734	1.42414	1.3104	1.23947	2.24415	1.32508		0.994546	1.09769	0.830181	0.945869	0.845952	0.984107	0.914472	0.590458
898	Q14781	CBX2	Chromobox protein homolog 2 OS=Homo sapiens OX=9606 GN=CBX2 PE=1 SV=2			1	9.26654	10.1504	22.753	19.4096	29.3608	26.1459	27.6215	19.3488	26.851	22.3595	28.0359	29.6043	52.1434	23.6873	43.8931	29.748		0.31513	0.345188	0.773769	0.660068	0.998482	0.889152	0.939333	0.658001	0.913131	0.760387	0.953426	1.00676	1.77326	0.805542	1.49269	1.01165		1.09538	0.890504	0.832725	0.454272	0.853057	0.700498	1.05594	0.677738
899	Q13185	CBX3	Chromobox protein homolog 3 OS=Homo sapiens OX=9606 GN=CBX3 PE=1 SV=4			1	32.8238	32.5593	41.4059	40.6069	122.066	123.376	89.2951	97.1729	145.466	123.827	110.6	148.201	134.531	125.226	154.907	137.751		0.301907	0.299474	0.380843	0.373494	1.12274	1.13479	0.821318	0.893776	1.33797	1.13894	1.01728	1.36312	1.23739	1.1518	1.4248	1.26701		0.991942	1.01073	0.851244	0.930834	0.980703	1.08822	1.33997	0.88925
900	O00257	CBX4	E3 SUMO-protein ligase CBX4 OS=Homo sapiens OX=9606 GN=CBX4 PE=1 SV=3			1	11.0659	8.84987	23.8564	23.9308	27.1229	26.6158	24.2113	26.7411	27.5384	19.4281	28.8105	31.321	40.2899	30.755	44.9669	35.3556		0.417514	0.333903	0.900096	0.902903	1.02334	1.00421	0.913487	1.00894	1.03902	0.733018	1.08701	1.18173	1.52013	1.16038	1.69659	1.33396		0.799742	0.981304	0.705491	0.763343	1.00312	1.10449	1.08714	0.786258
901	P45973	CBX5	Chromobox protein homolog 5 OS=Homo sapiens OX=9606 GN=CBX5 PE=1 SV=1			2	68.0396	56.7539	100.585	84.9186	150.375	203.958	192.241	204.018	199.598	203.108	258.051	358.473	207.676	202.639	294.704	283.172		0.434974	0.362825	0.643036	0.542881	0.961341	1.30389	1.22899	1.30428	1.27602	1.29846	1.64971	2.2917	1.32766	1.29546	1.88403	1.81031		0.83413	1.35633	1.01759	0.975746	0.844247	1.06126	1.38916	0.960869
902	O95503	CBX6	Chromobox protein homolog 6 OS=Homo sapiens OX=9606 GN=CBX6 PE=1 SV=1			2	118.594	80.3723	174.142	115.093	269.234	246.11	217.073	179.573	172.55	149.173	201.91	243.918	360.03	252.625	284.713	257.078		0.515398	0.34929	0.756804	0.500183	1.17006	1.06957	0.943377	0.780406	0.749885	0.648291	0.87748	1.06004	1.56465	1.09788	1.23733	1.11723		0.67771	0.914112	0.86452	0.701678	0.660915	0.827247	1.20805	0.902937
903	Q9HC52	CBX8	Chromobox protein homolog 8 OS=Homo sapiens OX=9606 GN=CBX8 PE=1 SV=3			2	367.699	321.284	526.547	509.542	960.957	1105.18	915.162	830.031	890.739	768.831	873.833	1149.99	1373.22	1086.24	1199.17	1207.52		0.409394	0.357716	0.586255	0.567322	1.06992	1.2305	1.01894	0.924152	0.991744	0.856013	0.972921	1.28039	1.52894	1.20941	1.33515	1.34445		0.873769	1.15008	0.863138	0.791017	0.967705	0.906977	1.31603	1.00696
904	Q9Y3M2	CBY1	Protein chibby homolog 1 OS=Homo sapiens OX=9606 GN=CBY1 PE=1 SV=1			1	34.5321	35.3907	53.8725	55.8758	65.957	104.169	89.6793	96.3132	112.304	93.8595	102.115	163.745	86.9912	75.271	171.849	128.489		0.460759	0.472216	0.718817	0.745547	0.880059	1.38992	1.19658	1.2851	1.49846	1.25236	1.36251	2.18484	1.16072	1.00434	2.29297	1.71442		1.02486	1.57935	0.835763	0.865271	1.03719	1.07397	1.60354	0.747685
905	Q6P1N0	CC2D1A	Coiled-coil and C2 domain-containing protein 1A OS=Homo sapiens OX=9606 GN=CC2D1A PE=1 SV=1			5	128.827	104.636	195.698	204.507	363.226	467.152	330.055	361.693	486.378	482.368	447.244	549.399	467.004	421.883	539.472	509.962		0.356507	0.289563	0.541562	0.565939	1.00517	1.29277	0.913372	1.00092	1.34597	1.33487	1.23767	1.52037	1.29236	1.16749	1.4929	1.41123		0.812221	1.28612	0.991755	0.903382	1.04501	1.09586	1.22841	0.945298
906	Q5T0F9	CC2D1B	Coiled-coil and C2 domain-containing protein 1B OS=Homo sapiens OX=9606 GN=CC2D1B PE=1 SV=1			8	492.633	412.555	661.878	571.14	1720.53	1823.81	1509.19	1645.24	2076.98	1854.07	1918.76	2354.27	1855.14	1485.34	2270.93	1999.81		0.320658	0.268534	0.43082	0.371758	1.1199	1.18713	0.98234	1.0709	1.35192	1.20682	1.24893	1.53241	1.20752	0.966816	1.47816	1.30169		0.837449	1.06003	0.892676	0.800662	0.862908	1.09015	1.22697	0.880613
907	Q9P2K1	CC2D2A	Coiled-coil and C2 domain-containing protein 2A OS=Homo sapiens OX=9606 GN=CC2D2A PE=1 SV=3			5	224.904	177.745	462.727	420.077	602.751	752.479	879.142	689.561	743.142	608.182	889.785	1225.61	909.207	645.293	929.018	1010.6		0.362748	0.286685	0.746333	0.677542	0.972177	1.21367	1.41797	1.11219	1.19861	0.980937	1.43513	1.97679	1.46646	1.04079	1.49841	1.63		0.790315	1.24841	0.818393	0.709732	0.907829	0.784357	1.37742	1.08782
908	Q8IX12	CCAR1	Cell division cycle and apoptosis regulator protein 1 OS=Homo sapiens OX=9606 GN=CCAR1 PE=1 SV=2			10	849.082	562.303	936.209	660.718	2245.25	2556.11	2535.55	1850.6	1756.78	1336.55	2045.82	1954.39	2346.43	1736.79	2566.35	1964.29		0.471873	0.312497	0.520294	0.367191	1.24779	1.42055	1.40912	1.02846	0.976322	0.742781	1.13695	1.08614	1.30402	0.965213	1.42624	1.09164		0.662248	1.13845	0.760795	0.740184	0.705738	0.729861	0.955309	0.765402
909	Q8N163	CCAR2	Cell cycle and apoptosis regulator protein 2 OS=Homo sapiens OX=9606 GN=CCAR2 PE=1 SV=2			11	698.586	744.746	969.192	927.319	2872.75	3462.24	2389.55	2896.29	3538.8	3070.44	3680.13	4195.29	2922.98	2666.68	4192.68	3281.33		0.278512	0.296915	0.386397	0.369703	1.14531	1.38032	0.952665	1.15469	1.41085	1.22412	1.46719	1.67258	1.16533	1.06315	1.67154	1.3082		1.06608	1.2052	0.86765	0.912316	0.956796	1.21207	1.13998	0.782633
910	Q96A19	CCDC102A	Coiled-coil domain-containing protein 102A OS=Homo sapiens OX=9606 GN=CCDC102A PE=1 SV=2			2	19.8841	27.371	33.6388	36.3129	52.6632	85.4908	73.7271	69.0006	60.1665	82.4129	86.9027	115.665	72.695	66.354	92.0322	91.628		0.38721	0.533005	0.655061	0.707134	1.02553	1.66479	1.43571	1.34367	1.17164	1.60486	1.69229	2.25239	1.41562	1.29214	1.79218	1.78431		1.37653	1.62335	1.36975	0.912773	1.07949	0.935892	1.33097	0.995608
911	Q9BWC9	CCDC106	Coiled-coil domain-containing protein 106 OS=Homo sapiens OX=9606 GN=CCDC106 PE=1 SV=1			3	83.2144	73.2153	81.3121	85.5014	157.716	259.178	133.917	176.062	223.797	203.218	184.506	255.024	214.115	214.105	199.721	248.682		0.490331	0.431413	0.479122	0.503807	0.929323	1.52718	0.78909	1.03742	1.3187	1.19744	1.08718	1.5027	1.26165	1.26159	1.17683	1.46533		0.879839	1.64332	0.908046	0.999953	1.05152	1.31471	1.3822	1.24515
912	Q8NEF3	CCDC112	Coiled-coil domain-containing protein 112 OS=Homo sapiens OX=9606 GN=CCDC112 PE=1 SV=2			2	137.567	108.685	208.347	233.678	247.301	281.625	290.661	228.35	304.054	237.492	301.702	323.896	359.337	258.767	362.463	330.41		0.524935	0.414726	0.795021	0.89168	0.943664	1.07464	1.10912	0.87135	1.16022	0.906234	1.15125	1.23594	1.37118	0.987416	1.3831	1.2608		0.790051	1.13879	0.781085	0.720123	1.12158	0.785623	1.07356	0.911569
913	Q8IWD4	CCDC117	Coiled-coil domain-containing protein 117 OS=Homo sapiens OX=9606 GN=CCDC117 PE=1 SV=1			1	14.7603	11.5675	23.4238	24.3907	23.1879	33.4815	43.6938	30.6425	39.5406	23.7214	51.6537	76.597	31.5671	29.2909	48.1679	44.3229		0.541385	0.424278	0.859148	0.894613	0.850496	1.22805	1.60262	1.12392	1.45029	0.870064	1.89458	2.80946	1.15783	1.07434	1.76672	1.62569		0.78369	1.44392	0.599925	0.927893	1.04128	0.701301	1.48289	0.920175
914	Q8WUD4	CCDC12	Coiled-coil domain-containing protein 12 OS=Homo sapiens OX=9606 GN=CCDC12 PE=1 SV=1			1	83.9976	116.008	119.074	113.424	170.093	225.933	176.497	173.948	173.29	209.309	135.049	203.193	202.311	232.779	249.793	223.478		0.533579	0.736919	0.756396	0.720505	1.08048	1.4352	1.12116	1.10497	1.10079	1.3296	0.857874	1.29075	1.28514	1.47869	1.58676	1.4196		1.38109	1.32829	1.20785	1.1506	0.952551	0.985558	1.50459	0.894653
915	Q96HB5	CCDC120	Coiled-coil domain-containing protein 120 OS=Homo sapiens OX=9606 GN=CCDC120 PE=1 SV=1			3	106.31	81.2377	162.706	154.169	408.697	429.116	380.111	398.999	513.628	422.553	555.74	616.681	463.527	411.47	636.794	527.217		0.284982	0.217772	0.436162	0.413277	1.09558	1.15032	1.01895	1.06959	1.37687	1.13273	1.48976	1.65312	1.24256	1.10302	1.70704	1.4133		0.764159	1.04996	0.822683	0.887694	0.947531	1.04969	1.10966	0.827924
[truncated: 6,694 more rows]

## Sheet: Heavy polysome
Pooled sucrose gradient fractions (heavy polysome) analysis with or without low-dose emetine treatment. 16plex TMT-MS3 analysis of HEK293 Flp-In T-REx cells (WT vs ∆EDF1). Analyzed with Comet (2018.01 rev. 2)
Related to Fig6B-6C and Fig6-figure supplement1A-1D
[truncated: 6,913 more rows]
